# Supplementary material for: Iridium-catalysed regioselective borylation of carboranes via direct B–H activation
Source: PubMed Central journal article supplement (PMC5357313; doi:10.1038/ncomms14827), 2017-03-16
Supplement: ncomms14827-s1.pdf [file ncomms14827-s1.pdf]

# Supplementary Information

## Supplementary Methods

**General Procedures.** All reactions were carried out in oven-dried glassware under an atmosphere of dry N<sub>2</sub> with the rigid exclusion of air and moisture using standard Schlenk techniques or in a glovebox. Organic solvents were freshly distilled from sodium benzophenone ketyl immediately prior to use. Compounds **1b**,<sup>1</sup> **1c**,<sup>2,3</sup> **1e**,<sup>2,3,4</sup> **1g**,<sup>4</sup> **1i**,<sup>4</sup> **1j**,<sup>4</sup> **1k**,<sup>5</sup> **1l**,<sup>2</sup> **1m**,<sup>2,3</sup> **1n**,<sup>6</sup> **1o**,<sup>2,3</sup> **1p**,<sup>7</sup> **1q**,<sup>6</sup> **1r**,<sup>8</sup> **6a**,<sup>9</sup> and ( $\eta^6$ -MesH)Ir(Bpin)<sub>3</sub><sup>10</sup> were prepared according to literature procedures. All other chemicals were purchased from either Aldrich or J&K Chemical Co. and used as received unless otherwise specified. <sup>1</sup>H and <sup>19</sup>F NMR spectra were recorded on a Varian Inova 300 spectrometer at 300 MHz and 282 MHz, respectively. <sup>13</sup>C{<sup>1</sup>H} NMR spectra were recorded on either a Varian Inova 300 spectrometer at 75 Hz or a Bruker 400 spectrometer at 100 Hz. <sup>11</sup>B{<sup>1</sup>H} NMR spectra were recorded on a Bruker 400 spectrometer at 128 MHz. All signals were reported in ppm unit with references to the residual solvent resonances of the deuterated solvents for proton and carbon chemical shifts, to external BF<sub>3</sub> OEt<sub>2</sub> (0.00) for boron chemical shifts and to external CFC<sub>3</sub> (0.00) for fluorine chemical shifts. Mass spectra were obtained on a Thermo Finnigan MAT 95 XL spectrometer. Elemental analyses were performed with an elementary VARIO EL III elemental analyzer, Shanghai Institute of Organic Chemistry, CAS.

## Preparation of Starting Materials.

### (1) Preparation of **1d**, **1f**, **1h**. A representative procedure.

To a THF (15 mL) solution of 9-iodo-*o*-carborane (2.700 g, 10.0 mmol) and [(PPh<sub>3</sub>)<sub>2</sub>PdCl<sub>2</sub>] (280 mg,

0.4 mmol) was added RMgBr (1.0 M in THF, 50.0 mL, 50.0 mmol) and CuI (76 mg, 0.4 mmol), respectively, under an atmosphere of dry nitrogen at 0 °C. The resulting mixture was stirred at 45 °C till the completion of the reaction as monitored by GC-MS. The reaction was slowly quenched with water at 0 °C and extracted with diethyl ether (20 mL x 3). The ether solutions were combined and concentrated to dryness in vacuo. The residue was subjected to flash column chromatography on silica gel (230-400 mesh) using *n*-hexane as eluent to give product **1**.

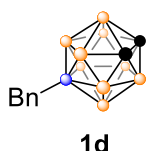

**1d**: Yield: 81%. White solid.  $^1\text{H}$  NMR ( $\text{CDCl}_3$ , 300 MHz):  $\delta$  7.21 (m, 2H), 7.04 (m, 3H) (aromatic CH), 3.44 (s, 1H), 3.39 (s, 1H) (cage CH), 3.21 (s, 2H) ( $\text{B}_{\text{cage}}\text{-CH}_2$ );  $^{13}\text{C}\{^1\text{H}\}$  NMR ( $\text{CDCl}_3$ , 75 MHz):  $\delta$  144.7, 128.5, 128.0, 124.1 (aromatic C), 53.3, 48.5 (cage CH), the  $\text{B}_{\text{cage}}\text{-CH}_2$  was not observed;  $^{11}\text{B}$  NMR ( $\text{CDCl}_3$ , 128 MHz):  $\delta$  8.4 (s, 1B) ( $\text{B}_{\text{cage}}\text{-CH}_2$ ), -1.9 (d,  $J_{\text{BH}} = 148$  Hz, 2B), -8.7 (d,  $J_{\text{BH}} = 149$  Hz, 2B), -13.7 (d,  $J_{\text{BH}} = 76$  Hz, 2B), -14.3 (m, 2B), -15.4 (d,  $J_{\text{BH}} = 163$  Hz, 2B) ( $\text{B}_{\text{cage}}\text{H}$ ); analysis (calcd., found for  $\text{C}_9\text{H}_{18}\text{B}_{10}$ ): C (46.13, 46.37), H (7.74, 7.69).

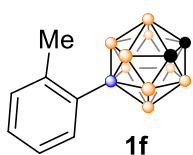

**1f**: Yield: 70%. White solid.  $^1\text{H}$  NMR ( $\text{CDCl}_3$ , 300 MHz):  $\delta$  7.50 (m, 1H), 7.08 (m, 3H) (aromatic CH), 3.58 (s, 1H), 3.55 (s, 1H) (cage CH), 2.49 (s, 3H) ( $\text{CH}_3$ ).  $^{13}\text{C}\{^1\text{H}\}$  NMR ( $\text{CDCl}_3$ , 75 MHz):  $\delta$  141.7, 136.0, 130.4, 127.5, 125.0 (aromatic C), 53.1, 50.5 (cage CH), 24.1 ( $\text{CH}_3$ ), the  $\text{B}_{\text{cage}}\text{-C}$  was not observed.  $^{11}\text{B}$  NMR ( $\text{CDCl}_3$ , 128 MHz):  $\delta$  7.7 (s, 1B) ( $\text{B}_{\text{cage}}\text{-C}$ ), -1.7 (d,  $J_{\text{BH}} = 149$  Hz, 2B), -8.4 (d,  $J_{\text{BH}} = 149$  Hz, 2B), -13.5 (d,  $J_{\text{BH}} = 91$  Hz, 2B), -14.2 (d,  $J_{\text{BH}} = 75$  Hz, 2B), -15.4 (d,  $J_{\text{BH}} = 163$  Hz, 2B) ( $\text{B}_{\text{cage}}\text{H}$ ); analysis (calcd., found for  $\text{C}_9\text{H}_{18}\text{B}_{10}$ ): C (46.13, 46.25), H (7.74, 7.46).

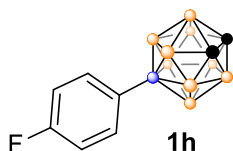

**1h**: White solid, Yield: 83%.  $^1\text{H}$  NMR ( $\text{CDCl}_3$ , 300 MHz):  $\delta$  7.33 (m, 2H), 6.92

(m, 2H) (aromatic CH), 3.64 (s, 1H), 3.53 (s, 1H) (cage CH).  $^{13}\text{C}\{^1\text{H}\}$  NMR

( $\text{CDCl}_3$ , 75 MHz):  $\delta$  162.9 (d,  $^1J_{\text{CF}} = 244$  Hz), 134.1 (d,  $^3J_{\text{CF}} = 7.4$  Hz), 114.4 (d,  $^2J_{\text{CF}} = 19.7$  Hz)

(aromatic C) 53.3, 50.0 (cage CH), the  $\text{B}_{\text{cage}}\text{-C}$  was not observed.  $^{11}\text{B}$  NMR ( $\text{CDCl}_3$ , 128 MHz):  $\delta$  7.6

(s, 1B) ( $\text{B}_{\text{cage}}\text{-C}$ ), -1.9 (d,  $J_{\text{BH}} = 149$  Hz, 2B), -8.4 (d,  $J_{\text{BH}} = 149$  Hz, 2B), -13.5 (d,  $J_{\text{BH}} = 52$  Hz, 2B),

-14.0 (m, 2B), -15.1 (d,  $J_{\text{BH}} = 174$  Hz, 2B) ( $\text{B}_{\text{cage}}\text{H}$ ); analysis (calcd., found for  $\text{C}_8\text{H}_{15}\text{FB}_{10}$ ): C (40.32,

40.16), H (6.34, 6.20).

## (2) Preparation of 1-Silyl-*o*-carboranes (**6b**, **6c**). A Representative Procedure.

To a diethyl ether solution (8 mL) of *o*-carborane (2.0 mmol) was added  $^n\text{BuLi}$  (1.6 M in ether, 1.3 mL) under an atmosphere of dry nitrogen at  $0^\circ\text{C}$ . After stirring for 2 h at  $0^\circ\text{C}$ , TBDMSCl (452 mg,

3.0 mmol) was added at  $0^\circ\text{C}$  and the resulting mixture was stirred overnight at room temperature.

After hydrolysis with water (10 mL) and extraction with diethyl ether (10 mL x 3), the ether

solutions were combined and concentrated to dryness in vacuo. The residue was subjected to flash

column chromatography on silica gel (230-400 mesh) using *n*-hexane as eluent to give the product **6**.

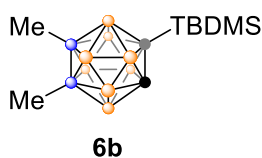

**6b**: Yield 81%. White solid.  $^1\text{H}$  NMR ( $\text{CDCl}_3$ , 300 MHz):  $\delta$  3.24 (s, 1H)

(cage CH), 1.01 (s, 9H) ( $\text{C}(\text{CH}_3)_3$ ), 0.21 (s, 6H) ( $\text{SiCH}_3$ ), 0.18 (s, 6H) ( $\text{B}_{\text{cage}}\text{-}$

$\text{CH}_3$ ).  $^{13}\text{C}\{^1\text{H}\}$  NMR ( $\text{CDCl}_3$ , 75 MHz):  $\delta$  57.1 (cage C), 53.6 (cage CH),

27.2 ( $\text{C}(\text{CH}_3)_3$ ), 19.5 ( $\text{C}(\text{CH}_3)_3$ ), -4.3 ( $\text{SiCH}_3$ ), the two  $\text{B}_{\text{cage}}\text{-CH}_3$  were not observed.  $^{11}\text{B}$  NMR

( $\text{CDCl}_3$ , 128 MHz):  $\delta$  9.9 (s, 1B), 7.9 (s, 1B) ( $\text{B}_{\text{cage}}\text{-CH}_3$ ), -5.2 (d,  $J_{\text{BH}} = 145$  Hz, 2B) ( $\text{B}_{\text{cage}}\text{H}$ ), -10.7

(d,  $J_{\text{BH}} = 177$  Hz, 2B) ( $\text{B}_{\text{cage}}\text{H}$ ), -12.4 (d,  $J_{\text{BH}} = 195$  Hz, 2B) ( $\text{B}_{\text{cage}}\text{H}$ ), -14.7 (d,  $J_{\text{BH}} = 172$  Hz, 2B)

( $B_{\text{cageH}}$ ); analysis (calcd., found for  $C_{10}H_{30}B_{10}Si$ ): C (41.92, 42.32), H (10.55, 10.56).

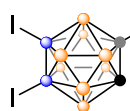

**6c**

**6c:** Yield 81%. White solid.  $^1H$  NMR ( $CDCl_3$ , 300 MHz):  $\delta$  3.83 (s, 1H) (cage CH), 1.03 (s, 9H) ( $C(CH_3)_3$ ), 0.25 (s, 6H) ( $SiCH_3$ ).  $^{13}C\{^1H\}$  NMR ( $CDCl_3$ , 75 MHz):  $\delta$  62.2 (cage C), 57.3 (cage CH), 27.0 ( $C(CH_3)_3$ ), 19.4 ( $C(CH_3)_3$ ), -4.3 ( $SiCH_3$ ).  $^{11}B$  NMR ( $CDCl_3$ , 128 MHz):  $\delta$  -2.7 (d,  $J_{BH} = 156$  Hz, 2B), -9.0 (m, 2B), -10.6 (m, 2B), -11.6 (m, 2B) ( $B_{\text{cageH}}$ ), -12.4 (s, 2B) ( $B_{\text{cage-I}}$ ); analysis (calcd., found for  $C_8H_{24}B_{10}I_2Si$ ): C (18.83, 19.07), H (4.74, 4.74).

### B(3,6)- or B(3)-borylation of *o*-carboranes.

Supplementary Table 1. Optimization of reaction conditions.\*

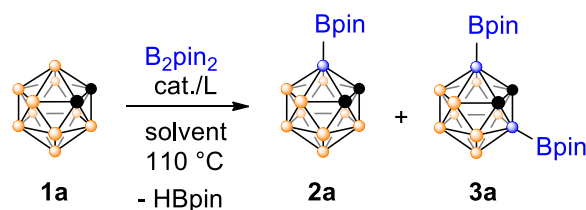

| entry          | cat. (mol%)                                 | L (mol%)                      | B <sub>2</sub> pin <sub>2</sub> (eq.) | solvent     | yield (%) <sup>†</sup> |    |    |
|----------------|---------------------------------------------|-------------------------------|---------------------------------------|-------------|------------------------|----|----|
|                |                                             |                               |                                       |             | 1a                     | 2a | 3a |
| 1              | [(cod)IrCl] <sub>2</sub> (3.5)              | -                             | 4                                     | THF         | 40                     | 60 | -  |
| 2              | [(cod)IrCl] <sub>2</sub> (3.5)              | Py (21)                       | 4                                     | THF         | 10                     | 23 | 67 |
| 3              | [(cod)IrCl] <sub>2</sub> (5.0)              | 2-MePy (20)                   | 4                                     | THF         | -                      | 10 | 90 |
| 4              | [(cod)IrCl] <sub>2</sub> (3.5)              | 2-MePy (14)                   | 4                                     | THF         | -                      | 10 | 90 |
| 5              | [(cod)IrCl] <sub>2</sub> (2.5)              | 2-MePy (10)                   | 4                                     | THF         | -                      | 20 | 80 |
| 6              | [(cod)IrCl] <sub>2</sub> (3.5)              | 2-MePy (21)                   | 4                                     | THF         | -                      | 2  | 98 |
| 7              | [(cod)IrCl] <sub>2</sub> (3.5)              | 2-MePy (21)                   | 2                                     | THF         | 3                      | 35 | 62 |
| 8              | [(cod)IrCl] <sub>2</sub> (3.5)              | 2-MePy (21)                   | 1                                     | THF         | 12                     | 65 | 23 |
| 9 <sup>‡</sup> | [(cod)IrCl] <sub>2</sub> (3.5)              | 2-MePy (21)                   | 4                                     | THF         | -                      | 9  | 91 |
| 10             | [(cod)IrCl] <sub>2</sub> (3.5)              | 2-MePy (32)                   | 4                                     | THF         | -                      | 2  | 98 |
| 11             | [(cod)IrCl] <sub>2</sub> (3.5)              | 2-MePy (21)                   | 4                                     | toluene     | 63                     | 37 | -  |
| 12             | [(cod)IrCl] <sub>2</sub> (3.5)              | 2-MePy (21)                   | 4                                     | DME         | 9                      | 58 | 33 |
| 13             | [(cod)IrCl] <sub>2</sub> (3.5)              | 2-MePy (21)                   | 4                                     | 1,4-dioxane | -                      | 33 | 67 |
| 14             | [(cod)IrCl] <sub>2</sub> (3.5)              | 4-MePy (21)                   | 4                                     | THF         | -                      | 5  | 95 |
| 15             | [(cod)IrCl] <sub>2</sub> (3.5)              | 4- <sup>t</sup> BuPy (21)     | 4                                     | THF         | 6                      | 54 | 40 |
| 16             | [(cod)IrCl] <sub>2</sub> (3.5)              | 2,6-Me <sub>2</sub> Py (21)   | 4                                     | THF         | 18                     | 68 | 14 |
| 17             | [(cod)IrCl] <sub>2</sub> (3.5)              | 2,4,6-Me <sub>3</sub> Py (21) | 4                                     | THF         | 32                     | 61 | 7  |
| 18             | [(cod)IrCl] <sub>2</sub> (3.5)              | 2-PhPy (21)                   | 4                                     | THF         | 8                      | 63 | 29 |
| 19             | [(cod)IrCl] <sub>2</sub> (3.5)              | 4-CF <sub>3</sub> Py (21)     | 4                                     | THF         | 81                     | 9  | -  |
| 20             | [(cod)IrCl] <sub>2</sub> (3.5)              | 2,6-F <sub>2</sub> Py (21)    | 4                                     | THF         | 71                     | 29 | -  |
| 21             | [(cod)Ir(OMe)] <sub>2</sub> (3.5)           | 2-MePy (21)                   | 4                                     | THF         | -                      | 14 | 86 |
| 22             | (cod)Ir(acac) (7.0)                         | 2-MePy (21)                   | 4                                     | THF         | -                      | 3  | 97 |
| 23             | (cod) <sub>2</sub> IrBF <sub>4</sub> (7.0)  | 2-MePy (21)                   | 4                                     | THF         | -                      | 2  | 98 |
| 24             | (cod) <sub>2</sub> IrB <sub>ArF</sub> (7.0) | 2-MePy (21)                   | 4                                     | THF         | -                      | 14 | 86 |
| 25             | [Cp*IrCl <sub>2</sub> ] <sub>2</sub> (3.5)  | 2-MePy (21)                   | 4                                     | THF         | 100                    | -  | -  |
| 26             | IrCl <sub>3</sub> (7.0)                     | 2-MePy (21)                   | 4                                     | THF         | 100                    | -  | -  |
| 27             | [(cod)RhCl] <sub>2</sub> (3.5)              | 2-MePy (21)                   | 4                                     | THF         | 60                     | 40 | -  |
| 28             | Pd(OAc) <sub>2</sub> (7.0)                  | 2-MePy (21)                   | 4                                     | THF         | 100                    | -  | -  |

\*Reaction conditions: **1a** (0.2 mmol), B<sub>2</sub>pin<sub>2</sub>, [M] catalyst, L, 110 °C (bath), 5 h; B<sub>2</sub>pin<sub>2</sub> = [B(OCMe<sub>2</sub>CMe<sub>2</sub>O)]<sub>2</sub>, Bpin = B(OCMe<sub>2</sub>CMe<sub>2</sub>O), cod = 1,5-cyclooctadiene, acac = acetylacetonato, B<sub>ArF</sub> = tetrakis[3,5-bis(trifluoromethyl)phenyl]borate, Py = pyridine. <sup>†</sup>GC yield. <sup>‡</sup>80 °C (bath).

**Supplementary Table 2. Optimization of reaction conditions with bipyridine ligands.\***

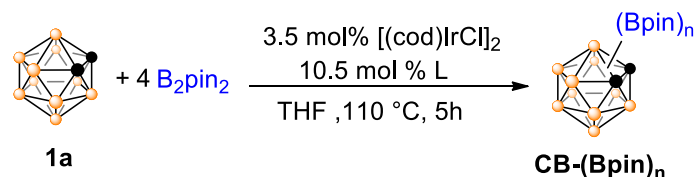

| entry          | L                                       | yield (%) <sup>†</sup> |                    |                          |              |
|----------------|-----------------------------------------|------------------------|--------------------|--------------------------|--------------|
|                |                                         | <b>1a</b>              | <b>n = 1</b>       | <b>n = 2</b>             | <b>n = 3</b> |
| 1              | 2,2'-bipy                               | 2                      | 3( <b>2a</b> ) + 1 | 73( <b>3a</b> ) + 5 + 4  | 8 + 4        |
| 2              | 4,4'-Me <sub>2</sub> bipy               | 2                      | 4( <b>2a</b> ) + 2 | 62( <b>3a</b> ) + 7 + 1  | 17 + 5       |
| 3              | 4,4'- <sup>t</sup> Bu <sub>2</sub> bipy | 3                      | 3( <b>2a</b> ) + 3 | 27( <b>3a</b> ) + 5 + 2  | 42 + 12 + 3  |
| 4              | 1,10-Phen                               | 4                      | 7( <b>2a</b> ) + 4 | 57( <b>3a</b> ) + 8 + 2  | 8 + 10       |
| 5              | 3,4,7,8-Me <sub>4</sub> -1,10-Phen      | 9                      | 8( <b>2a</b> ) + 4 | 35( <b>3a</b> ) + 11 + 2 | 18 + 13      |
| 6 <sup>‡</sup> | Py                                      | 10                     | 23( <b>2a</b> )    | 67( <b>3a</b> )          | -            |
| 7 <sup>‡</sup> | 2-MePy                                  | -                      | 2( <b>2a</b> )     | 98( <b>3a</b> )          | -            |

\*Reaction condition: **1a** (0.1 mmol), 3.5 mol% [(cod)IrCl]<sub>2</sub>, 10.5 mol% L. <sup>†</sup>The ratio and selectivity of borylation products were determined by GC-MS. Noted that there were several geometrical isomers of borylated species with the same MS using bipyridine ligands. <sup>‡</sup>21 mol% L.

### Preparation of B(3,6)-diborylated- or B(3)-borylated-*o*-carboranes (3 or 2). A Representative

**Procedure.** An oven-dried Schlenk flask equipped with a stir bar was charged with *o*-carborane (**1**) (0.5 mmol), B<sub>2</sub>pin<sub>2</sub> (508 mg, 2.0 mmol), [(cod)IrCl]<sub>2</sub> (11.8 mg, 0.0175 mmol), and 2-methylpyridine (9.8 mg, 0.105 mmol), followed by dry THF (5 mL). The flask was closed under an atmosphere of nitrogen and stirred at 110 °C (bath temperature) for 5 h. After hydrolysis with water (10 mL) and extraction with diethyl ether (10 mL x 3), the ether solutions were combined and concentrated to dryness in vacuo. The residue was subjected to flash column chromatography on silica gel (230-400 mesh) using *n*-hexane and ethyl acetate (10/1 in v/v) as eluent to give a mixture of product and B<sub>2</sub>pin<sub>2</sub>. Removal of B<sub>2</sub>pin<sub>2</sub> via sublimation at 90 °C under vacuum (0.1 torr) afforded a pure product **2o-r** or **3a-n**.

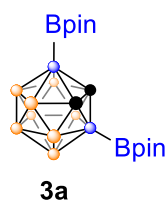

**3a:** Yield 83%. White solid.  $^1\text{H}$  NMR ( $\text{CDCl}_3$ , 300 MHz):  $\delta$  3.53 (s, 2H) (cage CH), 1.24 (s, 24H) ( $\text{CH}_3$ );  $^{13}\text{C}\{^1\text{H}\}$  NMR ( $\text{CDCl}_3$ , 75 MHz):  $\delta$  84.2 (OC), 57.6 (cage CH), 24.9 ( $\text{CH}_3$ );  $^{11}\text{B}$  NMR ( $\text{CDCl}_3$ , 128 MHz):  $\delta$  32.7 (s, 2B) ( $\text{B}-\text{B}_{\text{cage}}$ ), -0.9 (d,  $J_{\text{BH}} = 151$  Hz, 2B), -6.7 (d,  $J_{\text{BH}} = 156$  Hz, 2B) ( $\text{B}_{\text{cage}}\text{H}$ ), -11.8 (m, 6B) ( $\text{B}_{\text{cage}}\text{H}$  &  $\text{B}-\text{B}_{\text{cage}}$ ); analysis (calcd., found for  $\text{C}_{14}\text{H}_{34}\text{B}_{12}\text{O}_4$ ): C (42.45, 42.46), H (8.65, 8.71).

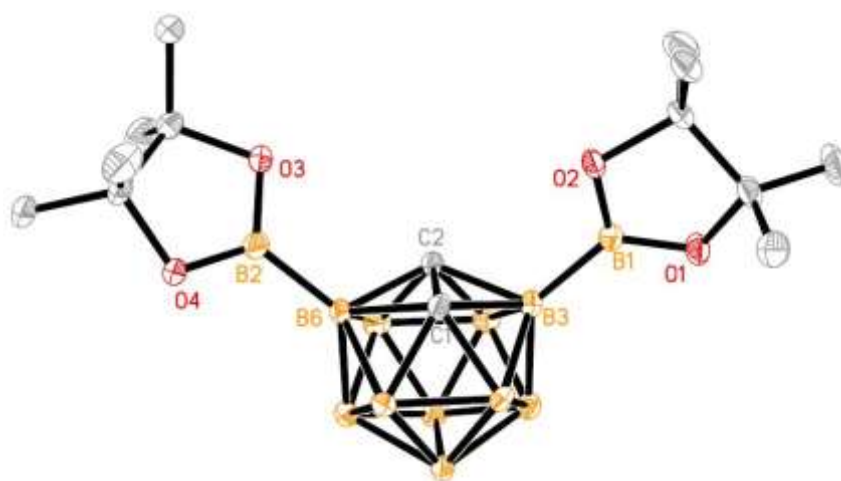

**Supplementary Figure 1.** Molecular structure of **3a** drawn with 30% probability ellipsoids.

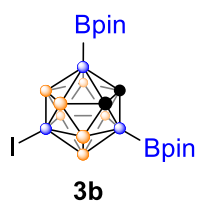

**3b:** Yield 84%. White solid.  $^1\text{H}$  NMR ( $\text{CDCl}_3$ , 300 MHz):  $\delta$  3.86 (s, 1H), 3.64 (s, 1H) (cage CH), 1.26 (s, 24H) ( $\text{CH}_3$ );  $^{13}\text{C}\{^1\text{H}\}$  NMR ( $\text{CDCl}_3$ , 75 MHz):  $\delta$  84.6 (OC), 58.0, 53.8 (cage CH), 25.0 ( $\text{CH}_3$ );  $^{11}\text{B}$  NMR ( $\text{CDCl}_3$ , 128 MHz):  $\delta$  32.4 (s, 2B) ( $\text{B}-\text{B}_{\text{cage}}$ ), 0.8 (d,  $J_{\text{BH}} = 144$  Hz, 1B), -4.9 (d,  $J_{\text{BH}} = 156$  Hz, 2B), -11.2 (m, 5B) ( $\text{B}_{\text{cage}}\text{H}$ ), -14.8 (s, 2B) ( $\text{B}_{\text{cage}}-\text{I}$  &  $\text{B}-\text{B}_{\text{cage}}$ ); analysis (calcd., found for  $\text{C}_{14}\text{H}_{33}\text{B}_{12}\text{O}_4\text{I}$ ): C (32.21, 32.48), H (6.37, 6.34).

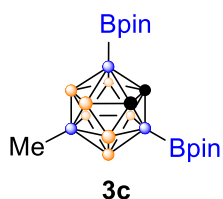

**3c:** Yield 78%. White solid.  $^1\text{H}$  NMR ( $\text{CDCl}_3$ , 300 MHz):  $\delta$  3.47 (s, 1H), 3.39 (s, 1H) (cage CH), 1.25 (s, 27H) ( $\text{CH}_3$ );  $^{13}\text{C}\{^1\text{H}\}$  NMR ( $\text{CDCl}_3$ , 75 MHz):  $\delta$  84.2

(OC), 56.6, 50.4 (cage CH), 25.0 (CCH<sub>3</sub>), the B<sub>cage</sub>-CH<sub>3</sub> was not observed; <sup>11</sup>B NMR (CDCl<sub>3</sub>, 128 MHz): δ 32.9 (s, 2B) (B-B<sub>cage</sub>), 9.1 (s, 1B) (B<sub>cage</sub>Me), 0.6 (d, J<sub>BH</sub> = 42 Hz, 1B) (B<sub>cage</sub>H), -5.5 (d, J<sub>BH</sub> = 132 Hz, 2B) (B<sub>cage</sub>H), -11.8 (m, 6B) (B<sub>cage</sub>H & B-B<sub>cage</sub>); analysis (calcd., found for C<sub>15</sub>H<sub>36</sub>B<sub>12</sub>O<sub>4</sub>): C (43.92, 43.93), H (8.85, 8.91).

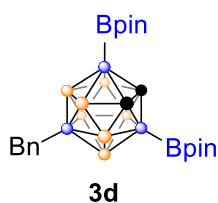

**3d:** Yield 82%. White solid. <sup>1</sup>H NMR (CDCl<sub>3</sub>, 300 MHz): δ 7.19 (m, 2H), 7.04 (m, 3H) (aromatic CH), 3.47 (s, 1H), 3.45 (s, 1H) (cage CH), 2.22 (s, 2H) (CH<sub>2</sub>), 1.29 (s, 24H) (CH<sub>3</sub>); <sup>13</sup>C{<sup>1</sup>H} NMR (CDCl<sub>3</sub>, 75 MHz): δ 144.8, 128.5, 127.8,

123.8 (aromatic C), 84.1 (OC), 56.4, 51.7 (cage CH), 24.9(CH<sub>3</sub>), the B<sub>cage</sub>-CH<sub>2</sub> was not observed; <sup>11</sup>B{<sup>1</sup>H} NMR (CDCl<sub>3</sub>, 128 MHz): δ 33.1 (s, 2B) (B-B<sub>cage</sub>), 10.0 (s, 1B) (B<sub>cage</sub>-Bn), -0.2 (d, J<sub>BH</sub> = 61 Hz, 1B) (BH), -5.9 (d, J<sub>BH</sub> = 113 Hz, 2B) (B<sub>cage</sub>H), -11.9 (m, 6B) (B<sub>cage</sub>H & B-B<sub>cage</sub>); analysis (calcd., found for C<sub>21</sub>H<sub>40</sub>B<sub>12</sub>O<sub>4</sub>): C (51.87, 51.50), H (8.29, 8.34).

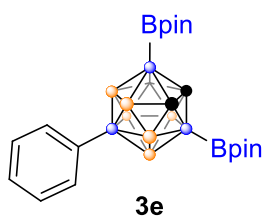

**3e:** Yield 83%. White solid. <sup>1</sup>H NMR (CDCl<sub>3</sub>, 300 MHz): δ 7.40 (m, 2H) 7.20 (m, 3H) (aromatic CH), 3.66 (s, 1H), 3.57 (s, 1H) (cage CH), 1.29 (s, 24H) (CH<sub>3</sub>); <sup>13</sup>C{<sup>1</sup>H} NMR (CDCl<sub>3</sub>, 75 MHz): δ 132.5, 127.3, 127.0 (aromatic C),

84.3 (OC), 56.4, 52.1 (cage CH), 25.0 (CH<sub>3</sub>), the B<sub>cage</sub>-C was not observed; <sup>11</sup>B NMR (CDCl<sub>3</sub>, 128 MHz): δ 33.1 (s, 2B) (B-B<sub>cage</sub>), 9.4 (s, 1B) (B<sub>cage</sub>-Ph), 0.2 (d, J<sub>BH</sub> = 50 Hz, 1B) (B<sub>cage</sub>H), -6.1 (d, J<sub>BH</sub> = 148 Hz, 2B) (B<sub>cage</sub>H), -11.9 (m, 6B) (B<sub>cage</sub>H & B-B<sub>cage</sub>); analysis (calcd., found for C<sub>20</sub>H<sub>38</sub>B<sub>12</sub>O<sub>4</sub>): C (50.87, 51.22), H (8.11, 8.13).

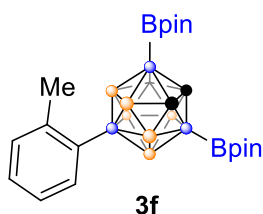

**3f:** Yield 95%. White solid. <sup>1</sup>H NMR (CDCl<sub>3</sub>, 300 MHz): δ 7.52 (m, 1H), 7.03



(m, 3H) (aromatic *CH*), 3.63 (s, 1H), 3.59 (s, 1H) (cage *CH*), 2.48 (s, 3H) ( $C_6H_4-CH_3$ ), 1.28 (s, 24H) ( $OC-CH_3$ );  $^{13}C\{^1H\}$  NMR ( $CDCl_3$ , 75 MHz):  $\delta$  141.6, 136.0, 130.1, 127.2, 124.7 (aromatic C), 84.3 (OC), 56.1, 53.6 (cage CH), 25.0 ( $OC-CH_3$ ), 24.0 ( $C_6H_4-CH_3$ ), the  $B_{cage}-C$  was not observed;  $^{11}B$  NMR ( $CDCl_3$ , 128 MHz):  $\delta$  33.1 (s, 2B) ( $B-B_{cage}$ ), 9.0 (s, 1B) ( $B_{cage}-C$ ), -0.1 (d,  $J_{BH} = 121$  Hz, 1B) ( $B_{cage}H$ ), -6.0 (d,  $J_{BH} = 118$  Hz, 2B) ( $B_{cage}H$ ), -12.2 (m, 6B) ( $B_{cage}H$  &  $B-B_{cage}$ ); analysis (calcd., found for  $C_{21}H_{40}B_{12}O_4$ ): C (51.87, 51.68), H (8.29, 8.29).

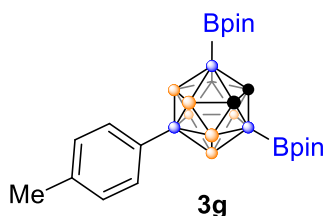

**3g:** Yield 88%. White solid.  $^1H$  NMR ( $CDCl_3$ , 300 MHz):  $\delta$  7.30 (d,  $J = 8.0$  Hz, 2H), 7.03 (d,  $J = 8.0$  Hz, 2H) (aromatic *CH*), 3.64 (s, 1H), 3.54 (s, 1H) (cage *CH*), 2.28 (s, 3H) ( $C_6H_4-CH_3$ ), 1.28 (s, 24H) ( $OC-CH_3$ );

$^{13}C\{^1H\}$  NMR ( $CDCl_3$ , 75 MHz):  $\delta$  136.5, 132.5, 128.1 (aromatic C), 84.3 (OC), 56.4, 51.9 (cage CH), 24.9, 21.3 ( $CH_3$ ), the  $B_{cage}-C$  was not observed;  $^{11}B$  NMR ( $CDCl_3$ , 128 MHz):  $\delta$  36.3 (s, 2B) ( $B-B_{cage}$ ), 12.5 (s, 1B) ( $B_{cage}-C$ ), 2.8 (d,  $J_{BH} = 110$  Hz, 1B) ( $B_{cage}H$ ), -2.9 (d,  $J_{BH} = 113$  Hz, 2B) ( $B_{cage}H$ ), -8.1 (m, 6B) ( $B_{cage}H$  &  $B-B_{cage}$ ); analysis (calcd., found for  $C_{21}H_{40}B_{12}O_4$ ): C (51.87, 51.76), H (8.29, 8.41).

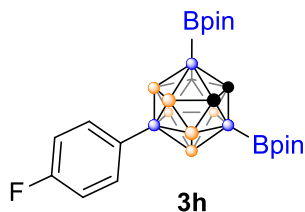

**3h:** Yield 94%. White solid.  $^1H$  NMR ( $CDCl_3$ , 300 MHz):  $\delta$  7.33 (m, 2H), 6.88 (m, 2H) (aromatic *CH*), 3.65 (s, 1H), 3.55 (s, 1H) (cage *CH*), 1.28 (s, 24H) ( $CH_3$ );  $^{13}C\{^1H\}$  NMR ( $CDCl_3$ , 75 MHz):  $\delta$  162.7 (d,  $^1J_{CF} = 263$  Hz),

134.1 (d,  $^3J_{CF} = 7.3$  Hz), 114.1 (d,  $^2J_{CF} = 19.6$  Hz) (aromatic C), 84.3 (OC), 56.5, 52.1 (cage CH), 25.0 ( $CH_3$ ), the  $B_{cage}-C$  was not observed;  $^{11}B$  NMR ( $CDCl_3$ , 128 MHz):  $\delta$  32.5 (s, 2B) ( $B-B_{cage}$ ), 8.9 (s, 1B) ( $B_{cage}-C$ ), -0.3 (d,  $J_{BH} = 116$  Hz, 1B) ( $B_{cage}H$ ), -6.0 (d,  $J_{BH} = 108$  Hz, 2B) ( $B_{cage}H$ ), -11.9 (m,

6B) ( $B_{\text{cage}}\text{H}$  &  $\text{B}-B_{\text{cage}}$ );  $^{19}\text{F}$  NMR ( $\text{CDCl}_3$ , 282 MHz):  $\delta$  -116.7 (m, 1F); analysis (calcd., found for  $\text{C}_{20}\text{H}_{37}\text{B}_{12}\text{O}_4\text{F}$ ): C (49.00, 48.98), H (7.61, 7.50).

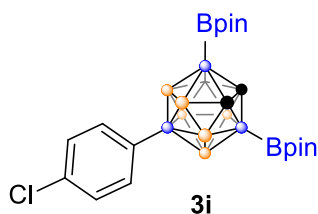

**3i:** Yield 89%. White solid.  $^1\text{H}$  NMR ( $\text{CDCl}_3$ , 300 MHz):  $\delta$  7.30 (d,  $J$  = 7.8 Hz, 2H), 7.15 (d,  $J$  = 7.8 Hz, 2H) (aromatic  $\text{CH}$ ), 3.65 (s, 1H), 3.55 (s, 1H) (cage  $\text{CH}$ ), 1.28 (s, 24H) ( $\text{CH}_3$ );  $^{13}\text{C}\{^1\text{H}\}$  NMR ( $\text{CDCl}_3$ , 75 MHz):  $\delta$  133.9, 133.2, 127.4 (aromatic C), 84.4 (OC), 56.6, 52.4 (cage  $\text{CH}$ ), 25.0 ( $\text{CH}_3$ ), the  $\text{B}_{\text{cage}}-\text{C}$  was not observed;  $^{11}\text{B}$  NMR ( $\text{CDCl}_3$ , 128 MHz):  $\delta$  33.1 (s, 2B) ( $\text{B}-\text{B}_{\text{cage}}$ ), 8.8 (s, 1B) ( $\text{B}_{\text{cage}}-\text{C}$ ), -0.3 (d,  $J_{\text{BH}}$  = 137 Hz, 1B) ( $\text{B}_{\text{cage}}\text{H}$ ), -6.0 (d,  $J_{\text{BH}}$  = 133 Hz, 2B) ( $\text{B}_{\text{cage}}\text{H}$ ), -12.0 (m, 6B) ( $\text{B}_{\text{cage}}\text{H}$  &  $\text{B}-\text{B}_{\text{cage}}$ ); analysis (calcd., found for  $\text{C}_{20}\text{H}_{37}\text{B}_{12}\text{O}_4\text{Cl}$ ): C (47.41, 47.15), H (7.36, 7.24).

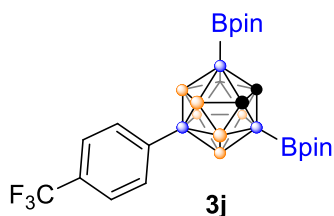

**3j:** Yield 89%. White solid.  $^1\text{H}$  NMR ( $\text{CDCl}_3$ , 300 MHz):  $\delta$  7.49 (d,  $J$  = 7.5 Hz, 2H), 7.42 (d,  $J$  = 7.5 Hz, 2H) (aromatic  $\text{CH}$ ), 3.68 (s, 1H), 3.58 (s, 1H) (cage  $\text{CH}$ ), 1.28 (s, 24H) ( $\text{CH}_3$ );  $^{13}\text{C}\{^1\text{H}\}$  NMR ( $\text{CDCl}_3$ , 75 MHz):  $\delta$  132.8, 124.0, 107.8 (aromatic C), 84.5 (OC), 56.7, 52.9 (cage  $\text{CH}$ ), 25.0 ( $\text{CH}_3$ ), the  $\text{B}_{\text{cage}}-\text{C}$  was not observed; and the  $\text{CF}_3$  was not observed due to the poor solubility of **3j**;  $^{11}\text{B}$  NMR ( $\text{CDCl}_3$ , 128 MHz):  $\delta$  32.4 (s, 2B) ( $\text{B}-\text{B}_{\text{cage}}$ ), 8.4 (s, 1B) ( $\text{B}_{\text{cage}}-\text{C}$ ), -0.6 (d,  $J_{\text{BH}}$  = 131 Hz, 1B) ( $\text{B}_{\text{cage}}\text{H}$ ), -6.1 (d,  $J_{\text{BH}}$  = 115 Hz, 2B) ( $\text{B}_{\text{cage}}\text{H}$ ), -12.1 (m, 6B) ( $\text{B}_{\text{cage}}\text{H}$  &  $\text{B}-\text{B}_{\text{cage}}$ );  $^{19}\text{F}$  NMR ( $\text{CDCl}_3$ , 282 MHz):  $\delta$  -62.5 (s, 3F); analysis (calcd., found for  $\text{C}_{21}\text{H}_{37}\text{B}_{12}\text{O}_4\text{F}_3$ ): C (46.69, 46.67), H (6.90, 6.79).

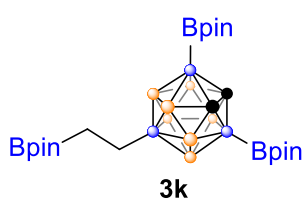

**3k:** Yield 91%. White solid.  $^1\text{H}$  NMR ( $\text{CDCl}_3$ , 300 MHz):  $\delta$  3.48 (s, 1H), 3.41 (s, 1H) (cage  $\text{CH}$ ), 1.25 (s, 24H), 1.22 (s, 12H) ( $\text{CH}_3$ ), 0.78 (m, 2H),

0.75 (m, 2H) ( $CH_2$ );  $^{13}C\{^1H\}$  NMR ( $CDCl_3$ , 75 MHz):  $\delta$  84.1, 82.7 (OC), 56.2, 50.9 (cage CH), 24.9 ( $CH_3$ ), the two B- $CH_2$  was not observed;  $^{11}B$  NMR ( $CDCl_3$ , 128 MHz):  $\delta$  33.0 (s, 3B) (*B*pin), 11.5 (s, 1B) ( $B_{cage-CH_2}$ ), -0.6 (d,  $J_{BH}$  = 125 Hz, 1B) ( $B_{cageH}$ ), -6.3 (d,  $J_{BH}$  = 134 Hz, 2B) ( $B_{cageH}$ ), -12.3 (m, 6B) ( $B_{cageH}$  & B- $B_{cage}$ ); analysis (calcd., found for  $C_{22}H_{49}B_{13}O_6$ ): C (48.03, 48.01), H (8.98, 8.94).

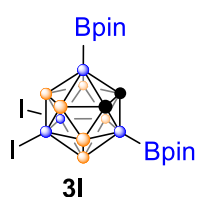

**31:** Yield 88%. White solid.  $^1H$  NMR ( $CDCl_3$ , 300 MHz):  $\delta$  3.96 (s, 2H) (cage CH), 1.25 (s, 24H) ( $CH_3$ );  $^{13}C\{^1H\}$  NMR ( $CDCl_3$ , 75 MHz):  $\delta$  84.8 (OC), 54.6 (cage CH), 25.0 ( $CH_3$ );  $^{11}B$  NMR ( $CDCl_3$ , 128 MHz):  $\delta$  32.4 (s, 2B) (B- $B_{cage}$ ), -3.3 (d,  $J_{BH}$  = 152 Hz, 2B) ( $B_{cageH}$ ), -11.0 (m, 4B) ( $B_{cageH}$ ), -12.6 (s, 4B) ( $B_{cage-I}$  & B- $B_{cage}$ ); analysis (calcd., found for  $C_{14}H_{32}B_{12}O_4I_2$ ): C (25.95, 26.07), H (4.98, 4.79).

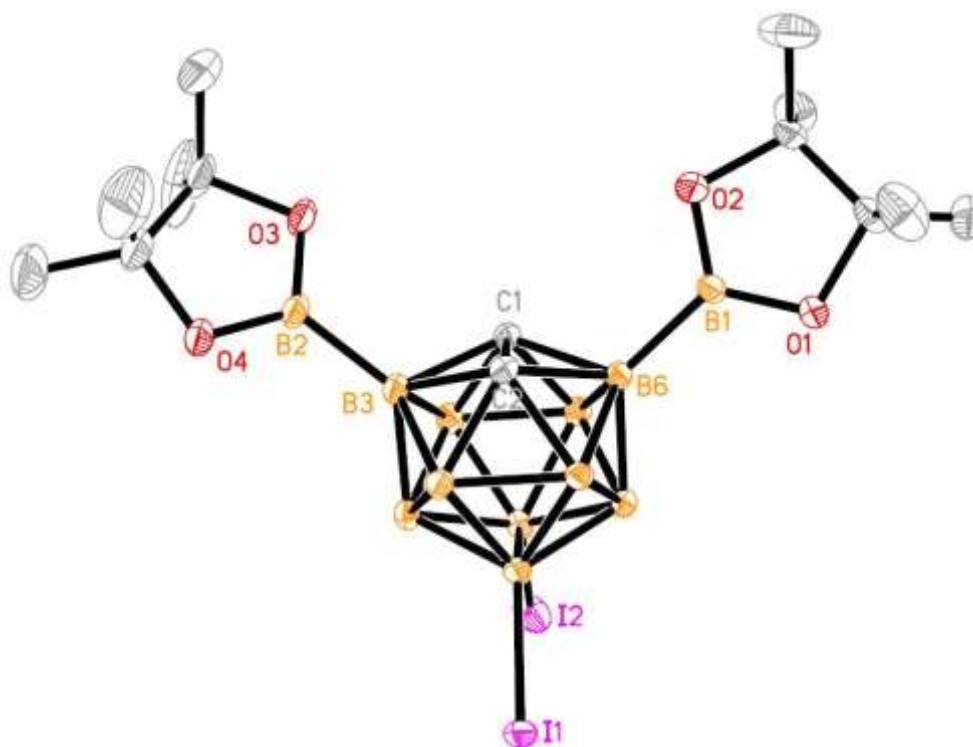

**Supplementary Figure 2.** Molecular structure of **31** drawn with 30% probability ellipsoids.

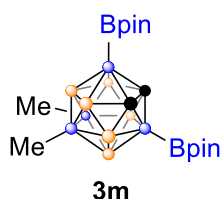

**3m:** Yield 85%. White solid.  $^1\text{H}$  NMR ( $\text{CDCl}_3$ , 300 MHz):  $\delta$  3.37 (s, 2H) (cage CH), 1.26 (s, 30H) ( $\text{CH}_3$ );  $^{13}\text{C}\{^1\text{H}\}$  NMR ( $\text{CDCl}_3$ , 75 MHz):  $\delta$  84.1 (OC), 50.5 (cage CH), 25.0 ( $\text{CCH}_3$ ), the two  $\text{B}_{\text{cage}}\text{-CH}_3$  were not observed;  $^{11}\text{B}$  NMR ( $\text{CDCl}_3$ , 128 MHz):  $\delta$  33.0 (s, 2B) ( $\text{B-B}_{\text{cage}}$ ), 9.0 (s, 2B) ( $\text{B}_{\text{cage}}\text{-CH}_3$ ), -4.6 (d,  $J_{\text{BH}} = 131$  Hz, 2B) ( $\text{B}_{\text{cage}}\text{H}$ ), -11.8 (d,  $J_{\text{BH}} = 138$  Hz, 4B) ( $\text{B}_{\text{cage}}\text{H}$ ), -15.1 (s, 2B) ( $\text{B-B}_{\text{cage}}$ ); analysis (calcd., found for  $\text{C}_{16}\text{H}_{38}\text{B}_{12}\text{O}_4$ ): C (45.30, 45.02), H (9.03, 8.70).

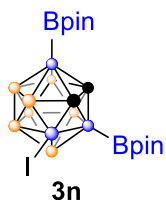

**3n:** Yield 63%. White solid.  $^1\text{H}$  NMR ( $\text{CDCl}_3$ , 300 MHz):  $\delta$  3.96 (s, 1H), 3.72 (s, 1H) (cage CH), 1.30 (s, 12H), 1.28 (s, 12H) ( $\text{CH}_3$ );  $^{13}\text{C}\{^1\text{H}\}$  NMR ( $\text{CDCl}_3$ , 75 MHz):  $\delta$  84.7, 84.5 (OC), 59.8 (cage CH), 25.1, 25.0 ( $\text{CH}_3$ );  $^{11}\text{B}$  NMR ( $\text{CDCl}_3$ , 128 MHz):  $\delta$  32.9 (s, 2B) ( $\text{B-B}_{\text{cage}}$ ), 1.1 (d,  $J_{\text{BH}} = 123$  Hz, 1B), 0.4 (d,  $J_{\text{BH}} = 96$  Hz, 1B), -4.6 (d,  $J_{\text{BH}} = 179$  Hz, 1B), -5.9 (d,  $J_{\text{BH}} = 148$  Hz, 1B), -8.9 (d,  $J_{\text{BH}} = 161$  Hz, 1B) ( $\text{B}_{\text{cage}}\text{H}$ ), -11.6 (m, 3B) ( $\text{B}_{\text{cage}}\text{H}$  &  $\text{B-B}_{\text{cage}}$ ), -25.1 (s, 2B) ( $\text{B}_{\text{cage}}\text{-I}$  &  $\text{B-B}_{\text{cage}}$ ); analysis (calcd., found for  $\text{C}_{14}\text{H}_{33}\text{B}_{12}\text{O}_4\text{I}$ ): C (32.21, 32.13), H (6.37, 6.40).

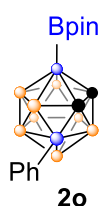

**2o:** Yield 76%. White solid.  $^1\text{H}$  NMR ( $\text{CDCl}_3$ , 300 MHz):  $\delta$  7.57 (m, 2H) 7.32 (m, 3H) (aromatic CH), 3.80 (s, 1H), 3.72 (s, 1H) (cage CH), 1.26 (s, 12H) ( $\text{CH}_3$ );  $^{13}\text{C}\{^1\text{H}\}$  NMR ( $\text{CDCl}_3$ , 75 MHz):  $\delta$  133.4, 128.6, 127.9 (aromatic C), 84.4 (OC), 57.0, 56.6 (cage CH), 25.0 ( $\text{CH}_3$ ), the  $\text{B}_{\text{cage}}\text{-C}$  were not observed;  $^{11}\text{B}$  NMR ( $\text{CDCl}_3$ , 128 MHz):  $\delta$  32.9 (s, 1B) ( $\text{B-B}_{\text{cage}}$ ), -1.4 (m, 4B) ( $\text{B}_{\text{cage}}\text{H}$  &  $\text{B}_{\text{cage}}\text{-Ph}$ ), -6.8 (d,  $J_{\text{BH}} = 168$  Hz, 1B) ( $\text{B}_{\text{cage}}\text{H}$ ), -8.4 (d,  $J_{\text{BH}} = 154$  Hz, 1B) ( $\text{B}_{\text{cage}}\text{H}$ ), -11.6 (d,  $J_{\text{BH}} = 158$  Hz, 1B) ( $\text{B}_{\text{cage}}\text{H}$ ), -13.7 (m, 3B) ( $\text{B}_{\text{cage}}\text{H}$  &  $\text{B-B}_{\text{cage}}$ ); analysis (calcd., found for  $\text{C}_{14}\text{H}_{27}\text{B}_{11}\text{O}_2$ ): C (48.56, 48.37), H (7.86, 7.82).

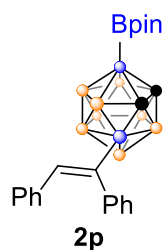

**2p**: Yield 89%. White solid.  $^1\text{H}$  NMR ( $\text{CDCl}_3$ , 300 MHz):  $\delta$  7.37 (m, 2H), 7.27 (m, 1H), 7.10 (m, 5H), 6.93 (m, 3H) (aromatic *CH* & olefinic *CH*), 3.53 (s, 1H), 3.36 (s, 1H) (cage *CH*), 1.26 (s, 12H) ( $\text{CH}_3$ );  $^{13}\text{C}\{^1\text{H}\}$  NMR ( $\text{CDCl}_3$ , 75 MHz):  $\delta$  142.9, 138.0, 137.4, 129.4, 129.0, 128.0, 127.8, 127.0, 126.4 (aromatic and olefinic *C*), 84.3 (OC), 55.8, 55.5 (cage *CH*), 24.9 ( $\text{CH}_3$ ), the  $\text{B}_{\text{cage}}\text{-C}$  was not observed;  $^{11}\text{B}$  NMR ( $\text{CDCl}_3$ , 128 MHz):  $\delta$  32.9 (s, 1B) ( $\text{B-B}_{\text{cage}}$ ), -1.6 (m, 3B) ( $\text{B}_{\text{cage}}\text{H}$  &  $\text{B}_{\text{cage}}\text{-C}$ ), -6.7 (d,  $J_{\text{BH}} = 190$  Hz, 1B), -8.3 (d,  $J_{\text{BH}} = 152$  Hz, 1B) ( $\text{B}_{\text{cage}}\text{H}$ ), -11.6 (m, 5B) ( $\text{B}_{\text{cage}}\text{H}$  &  $\text{B-B}_{\text{cage}}$ ); analysis (calcd., found for  $\text{C}_{22}\text{H}_{33}\text{B}_{11}\text{O}_2$ ): C (58.93, 59.05), H (7.42, 7.38).

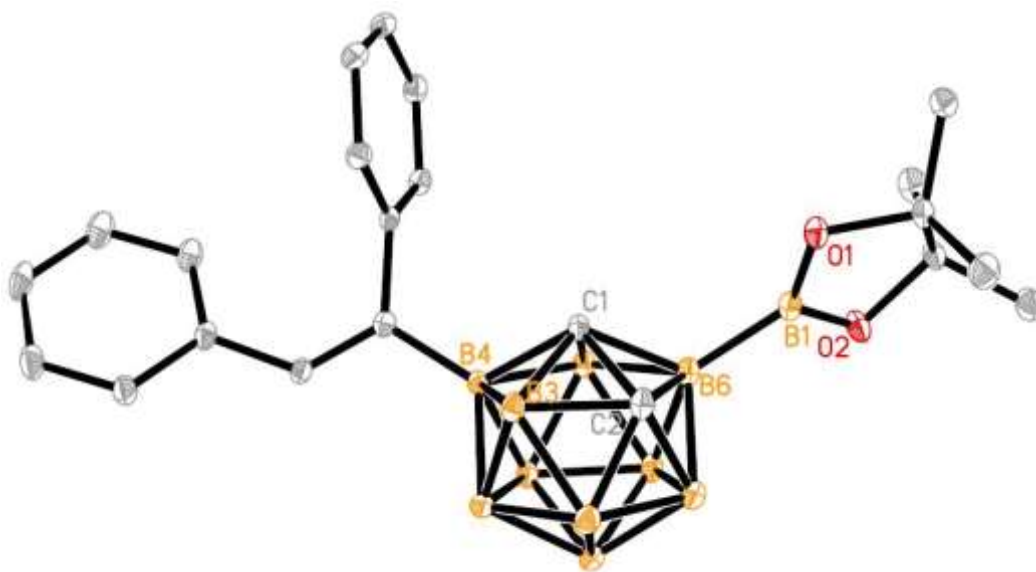

**Supplementary Figure 3.** Molecular structure of **2p** drawn with 30% probability ellipsoids.

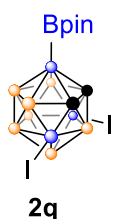

**2q**: Yield 83%. White solid.  $^1\text{H}$  NMR ( $\text{CDCl}_3$ , 300 MHz):  $\delta$  4.11 (s, 2H), (cage *CH*), 1.27 (s, 12H) ( $\text{CH}_3$ );  $^{13}\text{C}\{^1\text{H}\}$  NMR ( $\text{CDCl}_3$ , 75 MHz):  $\delta$  84.9 (OC), 60.6 (cage *CH*), 25.0 ( $\text{CH}_3$ );  $^{11}\text{B}$  NMR ( $\text{CDCl}_3$ , 128 MHz):  $\delta$  32.6 (s, 1B) ( $\text{B-B}_{\text{cage}}$ ), 1.3 (d,  $J_{\text{BH}} = 149$  Hz, 2B), -3.7 (d,  $J_{\text{BH}} = 124$  Hz, 1B), -6.7 (d,  $J_{\text{BH}} = 151$  Hz, 1B), -10.4 (d,  $J_{\text{BH}} = 169$  Hz, 1B), -11.8 (d,  $J_{\text{BH}} =$

161 Hz, 2B) ( $B_{\text{cageH}}$ ), -26.0 (s, 3B) ( $B_{\text{cage-I}}$  &  $B-B_{\text{cage}}$ ); analysis (calcd., found for  $\text{C}_8\text{H}_{21}\text{B}_{11}\text{O}_2\text{I}_2$ ): C (18.41, 18.64), H (4.06, 4.04).

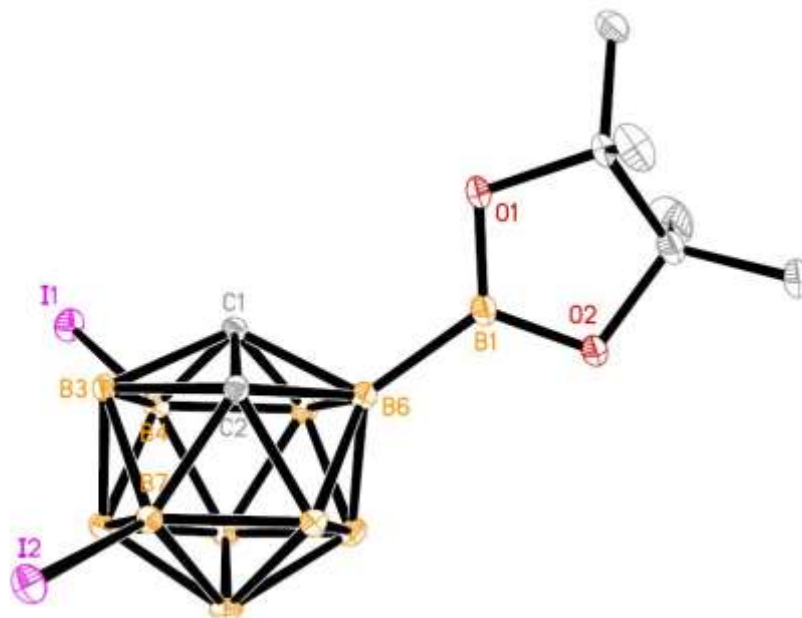

**Supplementary Figure 4.** Molecular structure of **2q** drawn with 30% probability ellipsoids.

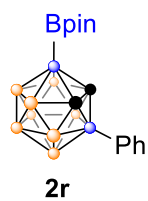

**2r:** Yield 89%. White solid.  $^1\text{H}$  NMR ( $\text{CDCl}_3$ , 300 MHz):  $\delta$  7.65 (m, 2H), 7.41 (m, 3H) (aromatic CH), 3.71 (s, 2H) (cage CH), 1.27 (s, 12H) ( $\text{CH}_3$ );  $^{13}\text{C}\{^1\text{H}\}$  NMR ( $\text{CDCl}_3$ , 75 MHz):  $\delta$  133.4, 129.8, 128.3 (aromatic C), 84.4 (OC), 58.5 (cage CH), 25.0 ( $\text{CH}_3$ ), the  $B_{\text{cage-C}}$  was not observed;  $^{11}\text{B}$  NMR ( $\text{CDCl}_3$ , 128 MHz):  $\delta$  32.8 (s, 1B) ( $B-B_{\text{cage}}$ ), -1.4 (d,  $J_{\text{BH}} = 145$  Hz, 2B) ( $B_{\text{cageH}}$ ), -4.5 (s, 1B) ( $B_{\text{cage-Ph}}$ ), -6.7 (d,  $J_{\text{BH}} = 142$  Hz, 1B) ( $B_{\text{cageH}}$ ), -12.3 (m, 6B) ( $B_{\text{cageH}}$  &  $B-B_{\text{cage}}$ ); analysis (calcd., found for  $\text{C}_{14}\text{H}_{27}\text{B}_{11}\text{O}_2$ ): C (48.56, 48.93), H (7.86, 8.00).

### Gram scale synthesis of **3a**.

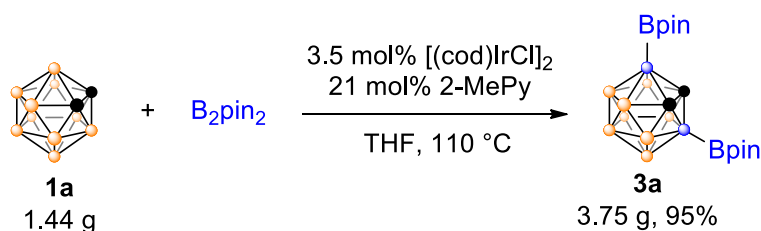

An oven-dried Schlenk flask equipped with a stir bar was charged with *o*-carborane (**1**) (1.44 g, 10 mmol),  $B_2pin_2$  (10.16 g, 40 mmol), [(cod)IrCl]<sub>2</sub> (236 mg, 0.35 mmol), and 2-methylpyridine (195 mg, 2.1 mmol), followed by dry THF (80 mL). The flask was closed under an atmosphere of nitrogen and stirred at 110 °C (bath temperature) for 5 h. After hydrolysis with water (80 mL) and extraction with diethyl ether (80 mL x 3), the ether solutions were combined and concentrated to dryness in vacuo. The residue was subjected to flash column chromatography on silica gel (230-400 mesh) using *n*-hexane and ethyl acetate (10/1 in v/v) as eluent to give a mixture of product and  $B_2pin_2$ . Removal of  $B_2pin_2$  via sublimation at 90 °C under vacuum (0.1 torr) afforded a pure product **3a** (3.75 g, 95%).

### Preparation of 3-Bpin-*o*-C<sub>2</sub>B<sub>10</sub>H<sub>11</sub> (**2a**).

An oven-dried Schlenk flask equipped with a stir bar was charged with *o*-carborane (**1**) (72 mg, 0.50 mmol),  $B_2pin_2$  (152 mg, 0.60 mmol), [(cod)IrCl]<sub>2</sub> (11.8 mg, 0.0175 mmol), and 2,6-dimethylpyridine (9.8 mg, 0.105 mmol), followed by dry THF (5 mL). The flask was closed under an atmosphere of nitrogen and stirred at 80 °C for 12 h. After hydrolysis with water (10 mL) and extraction with diethyl ether (10 mL x 3), the ether solutions were combined and concentrated to dryness in vacuo. The residue was subjected to flash column chromatography on silica gel (230-400 mesh) using *n*-hexane and ethyl acetate (10/1 in v/v) as eluent to give **2a** as a white solid (60 mg, 44%).

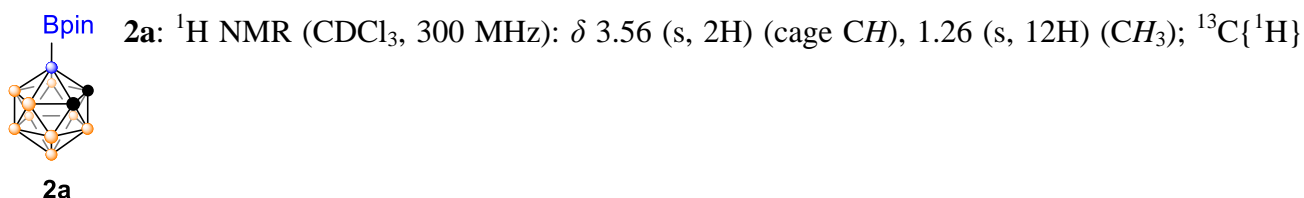

NMR (CDCl<sub>3</sub>, 75 MHz):  $\delta$  84.4 (OC), 56.3 (cage CH), 25.0 (CH<sub>3</sub>); <sup>11</sup>B NMR (CDCl<sub>3</sub>, 128 MHz):  $\delta$  32.9 (s, 1B) (*B*-B<sub>cage</sub>), -1.4 (d, *J*<sub>BH</sub> = 147 Hz, 2B), -7.5 (d, *J*<sub>BH</sub> = 157 Hz, 1B), -8.0 (d, *J*<sub>BH</sub> = 80 Hz, 1B) (*B*<sub>cage</sub>H), -12.5 (d, *J*<sub>BH</sub> = 164 Hz, 5B) (*B*<sub>cage</sub>H & *B*-B<sub>cage</sub>), -11.8 (d, *J*<sub>BH</sub> = 173 Hz, 1B) (*B*<sub>cage</sub>H); analysis (calcd., found for C<sub>8</sub>H<sub>23</sub>B<sub>11</sub>O<sub>2</sub>): C (35.56, 35.41), H (8.58, 8.55).

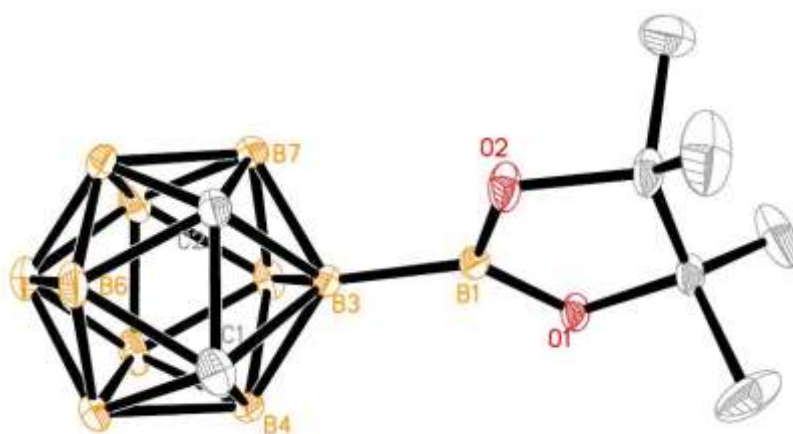

**Supplementary Figure 5.** Molecular structure of **2a** drawn with 30% probability ellipsoids.

### B(2)-borylation of *m*-carborane.

**Supplementary Table 3.** Optimization of conditions for B(2)-borylation of *m*-carborane <sup>a</sup>

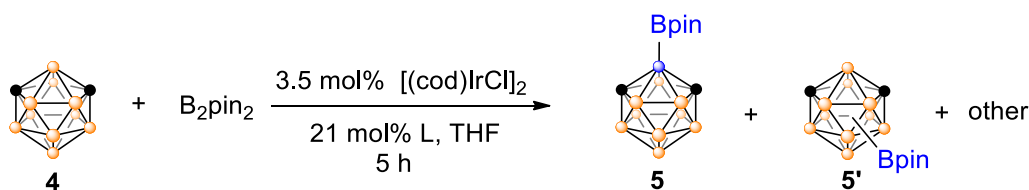

| Entry | L (mol %)              | T / °C | B <sub>2</sub> pin <sub>2</sub><br>(equiv) | Yield (%) <sup>b</sup> |    |    |                    |
|-------|------------------------|--------|--------------------------------------------|------------------------|----|----|--------------------|
|       |                        |        |                                            | 4                      | 5  | 5' | other <sup>c</sup> |
| 1     | 2-MePy                 | 110    | 4                                          | -                      | 77 | -  | 23                 |
| 2     | 2-MePy                 | 110    | 10                                         | -                      | 63 | -  | 37                 |
| 3     | 2-MePy                 | 80     | 4                                          | -                      | 70 | -  | 30                 |
| 4     | 2-MePy                 | 80     | 2                                          | 5                      | 84 | 4  | 7                  |
| 5     | 2-MePy                 | 80     | 1.5                                        | 6                      | 85 | 4  | 5                  |
| 6     | 2,6-Me <sub>2</sub> Py | 80     | 2                                          | 6                      | 85 | 4  | 5                  |
| 7     | 4- <i>t</i> BuPy       | 80     | 2                                          | 25                     | 63 | 8  | 3                  |



|                 |                           |    |   |    |    |    |    |
|-----------------|---------------------------|----|---|----|----|----|----|
| 8               | 2-PhPy                    | 80 | 2 | 46 | 50 | 4  | -  |
| 9               | 2,6-F <sub>2</sub> Py     | 80 | 2 | 39 | 60 | 1  | -  |
| 10 <sup>d</sup> | 2,2'-bipy                 | 80 | 2 | 20 | 29 | 31 | 20 |
| 11 <sup>d</sup> | 4,4'-Me <sub>2</sub> bipy | 80 | 2 | 10 | 47 | 19 | 24 |

<sup>a</sup>Reaction condition: **4** (0.2 mmol), 3.5 mol% [(cod)IrCl]<sub>2</sub>, 21 mol% L. <sup>b</sup>GC yield. <sup>c</sup>Other: geometrical isomers of diborylated *o*-carboranes. <sup>d</sup>14 mol% L.

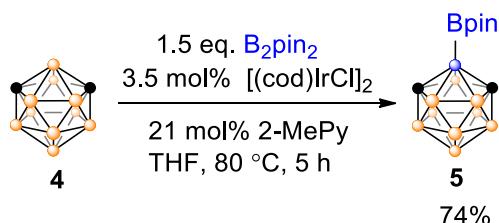

**Supplementary Figure 6.** Regioselective synthesis of 2-Bpin-*m*-carborane.

**Preparation of 2-Bpin-*m*-C<sub>2</sub>B<sub>10</sub>H<sub>11</sub> (**5**).** An oven-dried Schlenk flask equipped with a stir bar was charged with *m*-carborane (72 mg, 0.50 mmol), B<sub>2</sub>pin<sub>2</sub> (191 mg, 0.75 mmol), [(cod)IrCl]<sub>2</sub> (11.8 mg, 0.0175 mmol), and 2-methylpyridine (9.8 mg, 0.105 mmol), followed by dry THF (5 mL). The flask was closed under an atmosphere of nitrogen and stirred at 80 °C for 5 h. After hydrolysis with water (10 mL) and extraction with diethyl ether (10 mL x 3), the ether solutions were combined and concentrated to dryness in vacuo. The residue was subjected to flash column chromatography on silica gel (230-400 mesh) using *n*-hexane and ethyl acetate (30/1 in v/v) as eluent to give **5** as a white solid (100 mg, 74%).

**5**: Yield 74%. White solid. <sup>1</sup>H NMR (CDCl<sub>3</sub>, 300 MHz): δ 2.92 (s, 2H) (cage CH), 1.27 (s, 12H) (CH<sub>3</sub>); <sup>13</sup>C{<sup>1</sup>H} NMR (CDCl<sub>3</sub>, 75 MHz): δ 84.2 (OC), 57.0 (cage CH), 24.9 (CH<sub>3</sub>); <sup>11</sup>B NMR (CDCl<sub>3</sub>, 128 MHz): δ 34.8 (s, 1B) (B-B<sub>cage</sub>), -5.0 (d, J<sub>BH</sub> = 162 Hz, 2B) (B<sub>cage</sub>H), -8.0 (m, 2B) (B<sub>cage</sub>H), -11.1 (d, J<sub>BH</sub> = 163 Hz, 4B) (B<sub>cage</sub>H), -15.2 (m, 2B) (B<sub>cage</sub>H & B-B<sub>cage</sub>); analysis (calcd., found for C<sub>8</sub>H<sub>23</sub>B<sub>11</sub>O<sub>2</sub>): C (35.56, 35.43), H (8.58, 8.74).

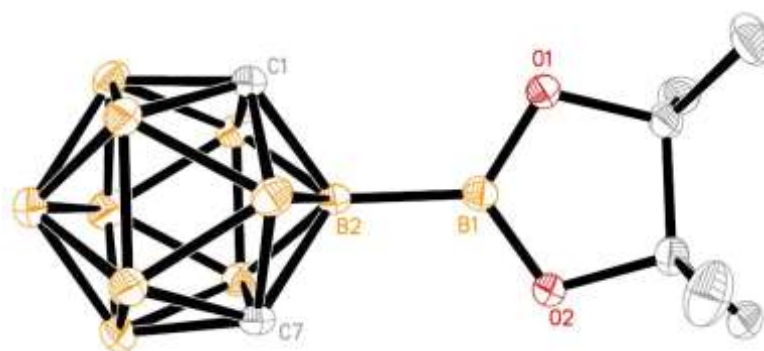

**Supplementary Figure 7.** Molecular structure of **5** drawn with 30% probability ellipsoids.

### B(4)-borylation of *o*-carboranes.

**Supplementary Table 4.** Optimization of B(4)-H borylation reaction.\*

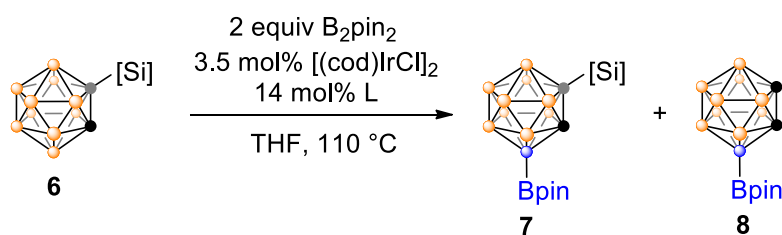

| Entry | [Si]  | L                         | Time (h) | Yield (%) <sup>†</sup> |          |          |                    |
|-------|-------|---------------------------|----------|------------------------|----------|----------|--------------------|
|       |       |                           |          | <b>6</b>               | <b>7</b> | <b>8</b> | other <sup>‡</sup> |
| 1     | TMS   | 4,4'-Me <sub>2</sub> bipy | 1        | 5                      | 54       | 5        | 36                 |
| 2     | TMS   | 4,4'-dtbpy                | 1        | 4                      | 43       | 12       | 41                 |
| 3     | TMS   | 2,2'-bipy                 | 1        | 8                      | 69       | 8        | 15                 |
| 4     | TES   | 2,2'-bipy                 | 1        | 5                      | 80       | 1        | 11                 |
| 5     | TBDMS | 2,2'-bipy                 | 1        | 10                     | 86       | -        | 4                  |
| 6     | TBDMS | 2,2'-bipy                 | 3        | 4                      | 90       | -        | 6                  |
| 7     | TBDMS | 2,2'-bipy                 | 5        | -                      | 88       | -        | 12                 |

\*Reactions were conducted on 0.2 mmol scale in a closed flask. TMS = trimethylsilyl, TES = triethylsilyl, TBDMS = tert-butyldimethylsilyl; 4,4'-Me<sub>2</sub>bipy = 4,4'-dimethyl-2,2'-bipyridine, 4,4'-dtbpy = 4,4'-di-tert-butyl-2,2'-bipyridine, 2,2'-bipy = 2,2'-bipyridine. <sup>†</sup>GC yield. <sup>‡</sup>Other: geometrical isomers of diborylated *o*-carboranes.

### Preparation of B(4)-borylated *o*-Carboranes (**8**). A Representative Procedure.

An oven-dried Schlenk flask equipped with a stir bar was charged with 1-TBDMS-*o*-carboranes (0.5

mmol), B<sub>2</sub>pin<sub>2</sub> (254 mg, 1.0 mmol), [(cod)IrCl]<sub>2</sub> (11.8 mg, 0.0175 mmol), and 2,2'-bipyridine (10.9 mg, 0.07 mmol), followed by dry THF (5 mL). The flask was closed under an atmosphere of nitrogen and stirred at 110 °C (bath temperature) for 3 h. After hydrolysis with water (10 mL) and extraction with diethyl ether (10 mL x 3), the ether solutions were combined and concentrated to dryness in vacuo. The residue was subjected to flash column chromatography on silica gel (230-400 mesh) using *n*-hexane and ethyl acetate (10/1 in v/v) as eluent to give a mixture of product and B<sub>2</sub>pin<sub>2</sub>. Removal of B<sub>2</sub>pin<sub>2</sub> by sublimation at 90 °C under vacuum (0.1 torr) afforded the pure product **7**.

To a solution (2 mL) of **7** (0.3 mmol) (acetone for **7a** and **7b**; MeOH/DCM (2/1 in v/v) for **7c**) was added CsF (182 mg, 1.2 mmol). The mixture was stirred at room temperature for 1 h for **7a,7b** and 20 min for **7c**. After filtration, the filtrate was concentrated to dryness in vacuo. The residue was subjected to flash column chromatography on silica gel (230–400 mesh) using *n*-hexane and ethyl acetate (10/1 in v/v) as eluent to give product **8**.

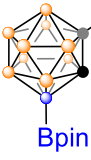
**7a**

**7a**: Yield 92%. White solid. <sup>1</sup>H NMR (CDCl<sub>3</sub>, 300 MHz): δ 3.46 (s, 1H) (cage CH), 1.24 (s, 6H), 1.23 (s, 6H) (OC(CH<sub>3</sub>)<sub>2</sub>), 1.01 (s, 9H) (C(CH<sub>3</sub>)<sub>3</sub>), 0.23 (s, 3H), 0.22 (s, 3H) (SiCH<sub>3</sub>); <sup>13</sup>C{<sup>1</sup>H} NMR (CDCl<sub>3</sub>, 75 MHz): δ 83.6 (OC), 67.6 (cage C), 61.9 (cage CH), 27.1 (C(CH<sub>3</sub>)<sub>3</sub>), 25.0, 24.8 (OC(CH<sub>3</sub>)<sub>2</sub>), 19.4 (SiC(CH<sub>3</sub>)<sub>3</sub>), -4.2 (SiCH<sub>3</sub>); <sup>11</sup>B NMR (CDCl<sub>3</sub>, 128 MHz): δ 34.3 (s, 1B) (B–B<sub>cage</sub>), -0.7 (d, J<sub>BH</sub> = 152 Hz, 1B), -1.0 (d, J<sub>BH</sub> = 143 Hz, 1B), -5.9 (d, J<sub>BH</sub> = 144 Hz, 2B), -9.8 (m, 2B), -10.9 (m, 2B) (B<sub>cage</sub>H), -12.4 (m, 2B) (B<sub>cage</sub>H & B–B<sub>cage</sub>); analysis (calcd., found for C<sub>14</sub>H<sub>37</sub>B<sub>11</sub>O<sub>2</sub>Si): C (43.74, 43.73), H (9.70, 9.73).

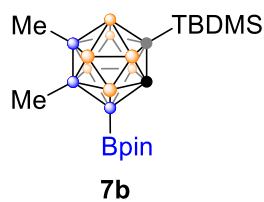

**7b:** Yield 92%. White solid.  $^1\text{H}$  NMR ( $\text{CDCl}_3$ , 300 MHz):  $\delta$  3.27 (s, 1H) (cage CH), 1.24 (s, 6H), 1.23 (s, 6H) ( $\text{OC}(\text{CH}_3)_2$ ), 1.0 (s, 9H) ( $\text{C}(\text{CH}_3)_3$ ), 0.21 (s, 3H), 0.20 (s, 3H) ( $\text{SiCH}_3$ ), 0.20 (s, 3H), 0.16 (s, 3H) ( $\text{B}_{\text{cage}}\text{-CH}_3$ );  $^{13}\text{C}\{^1\text{H}\}$  NMR ( $\text{CDCl}_3$ , 75 MHz):  $\delta$  83.3 (OC), 58.9 (cage C), 55.1 (cage CH), 27.1 ( $\text{C}(\text{CH}_3)_3$ ), 25.2, 24.7 ( $\text{OC}(\text{CH}_3)_2$ ), 19.4 ( $\text{SiC}(\text{CH}_3)_3$ ), -4.3 ( $\text{SiCH}_3$ ), the two  $\text{B}_{\text{cage}}\text{-CH}_3$  were not observed;  $^{11}\text{B}$  NMR ( $\text{CDCl}_3$ , 128 MHz):  $\delta$  33.8 (s, 1B) ( $\text{B-B}_{\text{cage}}$ ), 10.9 (s, 1B), 8.6 (s, 1B) ( $\text{B}_{\text{cage}}\text{-C}$ ), -4.1 (d,  $J_{\text{BH}} = 134$  Hz, 2B), -9.8 (d,  $J_{\text{BH}} = 143$  Hz, 2B), -11.1 (d,  $J_{\text{BH}} = 179$  Hz, 2B) ( $\text{B}_{\text{cage}}\text{H}$ ), -14.0 (m, 2B) ( $\text{B}_{\text{cage}}\text{H}$  &  $\text{B-B}_{\text{cage}}$ ); analysis (calcd., found for  $\text{C}_{16}\text{H}_{41}\text{B}_{11}\text{O}_2\text{Si}$ ): C (46.59, 47.11), H (10.02, 10.02).

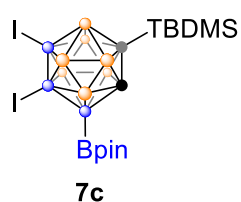

**7c:** Yield 89%. White solid.  $^1\text{H}$  NMR ( $\text{CDCl}_3$ , 300 MHz):  $\delta$  3.84 (s, 1H) (cage CH), 1.27 (s, 6H), 1.26 (s, 6H) ( $\text{OC}(\text{CH}_3)_2$ ), 1.01 (s, 9H) ( $\text{C}(\text{CH}_3)_3$ ), 0.24 (s, 6H) ( $\text{SiCH}_3$ );  $^{13}\text{C}\{^1\text{H}\}$  NMR ( $\text{CDCl}_3$ , 75 MHz):  $\delta$  84.2 (OC), 63.9 (cage C), 58.6 (cage CH), 27.0 ( $\text{C}(\text{CH}_3)_3$ ), 25.2, 24.7 ( $\text{OC}(\text{CH}_3)_2$ ), 19.4 ( $\text{SiC}(\text{CH}_3)_3$ ), -4.4 ( $\text{SiCH}_3$ );  $^{11}\text{B}$  NMR ( $\text{CDCl}_3$ , 128 MHz):  $\delta$  33.4 (s, 1B) ( $\text{B-B}_{\text{cage}}$ ), -2.8 (d,  $J_{\text{BH}} = 163$  Hz, 2B), -9.1 (m, 2B), -10.5 (m, 1B) ( $\text{B}_{\text{cage}}\text{H}$ ), -11.6 (m, 3B) ( $\text{B}_{\text{cage}}\text{H}$  &  $\text{B-B}_{\text{cage}}$ ), -12.9 (s, 2B) ( $\text{B}_{\text{cage}}\text{-I}$ ); analysis (calcd., found for  $\text{C}_{14}\text{H}_{35}\text{B}_{11}\text{I}_2\text{O}_2\text{Si}$ ): C (26.43, 26.47), H (5.54, 5.82).

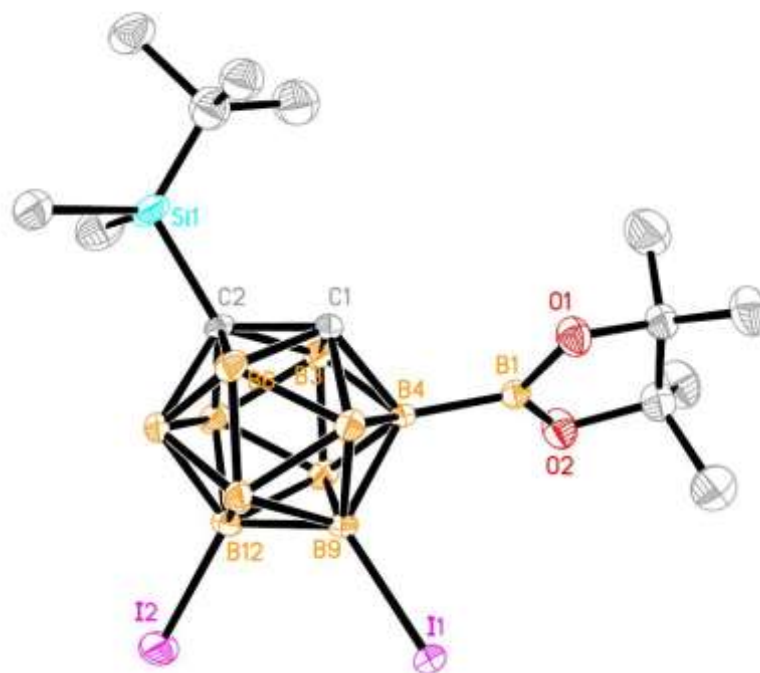

**Supplementary Figure 8.** Molecular structure of **7c** drawn with 30% probability ellipsoids.

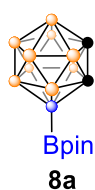

**8a:** Yield 95%. White solid.  $^1\text{H}$  NMR ( $\text{CDCl}_3$ , 300 MHz):  $\delta$  3.60 (s, 2H) (cage CH), 1.24 (s, 12H) ( $\text{CH}_3$ );  $^{13}\text{C}\{^1\text{H}\}$  NMR ( $\text{CDCl}_3$ , 75 MHz):  $\delta$  83.7 (OC), 56.1, 55.9 (cage CH), 24.9 ( $\text{CH}_3$ );  $^{11}\text{B}$  NMR ( $\text{CDCl}_3$ , 128 MHz):  $\delta$  33.9 (s, 1B) ( $\text{B}-\text{B}_{\text{cage}}$ ), -1.5 (d,  $J_{\text{BH}} = 168$  Hz, 2B) ( $\text{B}_{\text{cage}}\text{H}$ ), -8.1 (d,  $J_{\text{BH}} = 137$  Hz, 2B) ( $\text{B}_{\text{cage}}\text{H}$ ), -12.1 (m, 3B) ( $\text{B}_{\text{cage}}\text{H}$  &  $\text{B}-\text{B}_{\text{cage}}$ ), -13.9 (d,  $J_{\text{BH}} = 182$  Hz, 3B) ( $\text{B}_{\text{cage}}\text{H}$ ); analysis (calcd., found for  $\text{C}_8\text{H}_{23}\text{B}_{11}\text{O}_2$ ): C (35.56, 35.65), H (8.58, 8.62).

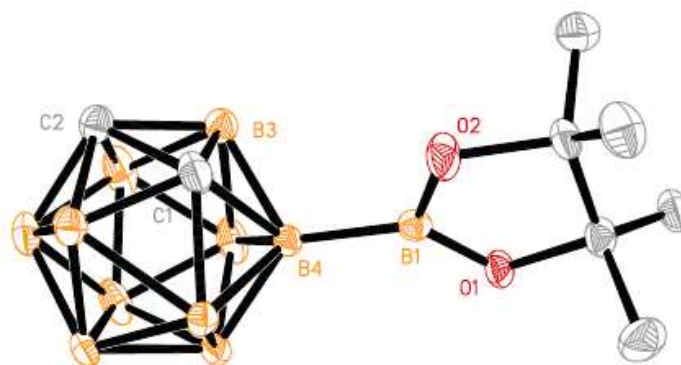

**Supplementary Figure 9.** Molecular structure of **8a** drawn with 30% probability ellipsoids.

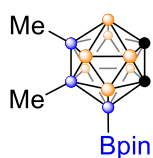

**8b**: Yield 94%. White solid.  $^1\text{H}$  NMR ( $\text{CDCl}_3$ , 300 MHz):  $\delta$  3.40 (s, 2H) (cage CH), 1.24 (s, 6H), 1.22 (s, 6H) ( $\text{OC}(\text{CH}_3)_2$ ), 0.21 (s, 3H), 0.19 (s, 3H) ( $\text{BCH}_3$ );  $^{13}\text{C}\{^1\text{H}\}$  NMR ( $\text{CDCl}_3$ , 75 MHz):  $\delta$  83.4 (OC), 49.2, 49.0 (cage CH), 25.1, 24.8 ( $\text{OC}(\text{CH}_3)_2$ ),

the two  $\text{B}_{\text{cage}}\text{-CH}_3$  were not observed;  $^{11}\text{B}$  NMR ( $\text{CDCl}_3$ , 128 MHz):  $\delta$  35.1 (s, 1B) ( $\text{B-B}_{\text{cage}}$ ), 9.6 (s, 2B) ( $\text{B}_{\text{cage}}\text{-CH}_3$ ), -5.0 (d,  $J_{\text{BH}} = 145$  Hz, 2B) ( $\text{B}_{\text{cage}}\text{H}$ ), -11.5 (m, 4B) ( $\text{B}_{\text{cage}}\text{H}$  &  $\text{B-B}_{\text{cage}}$ ), -14.3 (d,  $J_{\text{BH}} = 169$  Hz, 2B) ( $\text{B}_{\text{cage}}\text{H}$ ); analysis (calcd., found for  $\text{C}_{10}\text{H}_{27}\text{B}_{11}\text{O}_2$ ): C (40.27, 40.58), H (9.12, 9.19).

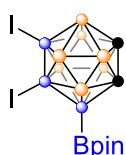

**8c**: Yield 95%. White solid.  $^1\text{H}$  NMR ( $\text{CDCl}_3$ , 300 MHz):  $\delta$  4.06 (s, 2H) (cage CH), 1.32 (s, 12H) ( $\text{CH}_3$ );  $^{13}\text{C}\{^1\text{H}\}$  NMR ( $\text{CDCl}_3$ , 75 MHz):  $\delta$  84.4 (OC), 53.4, 53.1 (cage CH), 25.2, 24.8 ( $\text{CH}_3$ );  $^{11}\text{B}$  NMR ( $\text{CDCl}_3$ , 128 MHz):  $\delta$  35.1 (s, 1B) ( $\text{B-B}_{\text{cage}}$ ), -4.6 (d,  $J_{\text{BH}} =$

161 Hz, 2B), -11.7 (m, 2B) ( $\text{B}_{\text{cage}}\text{H}$ ), -13.1 (m, 6B) ( $\text{B}_{\text{cage}}\text{H}$ ,  $\text{B}_{\text{cage}}\text{-I}$  &  $\text{B-B}_{\text{cage}}$ ); analysis (calcd., found for  $\text{C}_8\text{H}_{21}\text{B}_{11}\text{I}_2\text{O}_2$ ): C (18.41, 18.33), H (4.06, 3.94).

### Transformation of 3,6-(Bpin) $_2$ -*o*-carborane (3a)

#### Preparation of 3,6-Diphenyl-*o*-carborane (9)

An oven-dried Schlenk flask equipped with a stir bar was charged with **3a** (198 mg, 0.5 mmol), bromobenzene (236 mg, 1.5 mmol),  $\text{Pd}(\text{PPh}_3)_4$  (115 mg, 0.1 mmol) and  $\text{Cs}_2\text{CO}_3$  (490 mg, 1.5 mmol), followed by dry cyclohexane (5 mL). The flask was closed under an atmosphere of nitrogen and stirred at 150 °C (bath temperature) for 8 h. After cooled to room temperature, water (10 mL) and 30%  $\text{H}_2\text{O}_2$  (5 mL) aqueous solution were successively added and the mixture was stirred at room temperature for 15 min. After extraction with diethyl ether (10 mL x 3), the ether solutions were

combined and concentrated to dryness in vacuo. The residue was subjected to flash column chromatography on silica gel (230-400 mesh) using *n*-hexane and ethyl acetate (100/1 in v/v) as eluent to give a white solid. Removal of biphenyl byproduct via sublimation at 90 °C under vacuum (0.1 torr) gave the pure 3,6-diphenyl-*o*-carborane (**9**) as a white solid (120 mg, 81%).

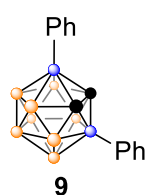

**9**:  $^1\text{H}$  NMR ( $\text{CDCl}_3$ , 300 MHz):  $\delta$  7.62 (m, 4H) 7.40 (m, 6H) (aromatic CH), 3.85 (s, 2H) (cage CH);  $^{13}\text{C}\{^1\text{H}\}$  NMR ( $\text{CDCl}_3$ , 75 MHz):  $\delta$  133.3, 130.0, 128.4 (aromatic C), 59.2 (cage CH), the two  $\text{B}_{\text{cage}}\text{-C}$  were not observed;  $^{11}\text{B}$  NMR ( $\text{CDCl}_3$ , 128 MHz):  $\delta$  -2.2 (d,  $J_{\text{BH}} = 149$  Hz, 2B) ( $\text{B}_{\text{cage}}\text{H}$ ), -3.7 (s, 2B) ( $\text{B}_{\text{cage}}\text{-Ph}$ ), -11.2 (d,  $J_{\text{BH}} = 182$  Hz, 2B) ( $\text{B}_{\text{cage}}\text{H}$ ), -12.8 (d,  $J_{\text{BH}} = 173$  Hz, 4B) ( $\text{B}_{\text{cage}}\text{H}$ ); analysis (calcd., found for  $\text{C}_{14}\text{H}_{20}\text{B}_{10}$ ): C (56.73, 56.18), H (6.80, 6.71).

### Preparation of 3,6-Diallyl-*o*-carborane (**10**)

Compound **3a** (198 mg, 0.5 mmol), allyl chloride (230 mg, 3.0 mmol),  $\text{Pd}(\text{dba})_2$  (58 mg, 0.1 mmol) and  $\text{Cs}_2\text{CO}_3$  (490 mg, 1.5 mmol) were mixed in toluene (6 mL). The resulting mixture was stirred at room temperature under nitrogen atmosphere for 8 h. After hydrolysis with water (10 mL) and extraction with diethyl ether (10 mL x 3), the ether solutions were combined and concentrated to dryness in vacuo. The residue was subjected to flash column chromatography on silica gel (230-400 mesh) using *n*-hexane as eluent to give **10** as a colorless liquid (97 mg, 87%).

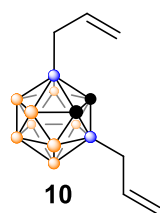

**10**:  $^1\text{H}$  NMR ( $\text{CDCl}_3$ , 300 MHz):  $\delta$  5.80 (m, 2H) ( $\text{CH}=\text{CH}_2$ ), 4.96 (m, 4H) ( $\text{CH}_2=\text{CH}$ ), 3.25 (s, 2H) (cage CH), 2.01 (d,  $J = 6.9$ , 4H) ( $\text{B}_{\text{cage}}\text{-CH}_2$ );  $^{13}\text{C}\{^1\text{H}\}$  NMR ( $\text{CDCl}_3$ , 75 MHz):  $\delta$  135.9, 115.7 (olefinic C), 57.6 (cage CH), the two  $\text{B}_{\text{cage}}\text{-CH}_2$  were not observed;  $^{11}\text{B}$  NMR ( $\text{CDCl}_3$ , 128 MHz):  $\delta$  -2.3 (d,  $J_{\text{BH}} = 145$  Hz, 2B) ( $\text{B}_{\text{cage}}\text{H}$ ), -4.0 (s, 2B) ( $\text{B}_{\text{cage}}\text{-C}$ ),

-12.4 (m, 6B) ( $B_{\text{cageH}}$ ); analysis (calcd., found for  $\text{C}_8\text{H}_{20}\text{B}_{10}$ ): C (42.83, 43.31), H (8.99, 8.94).

### Preparation of 3,6-Dihalogen-*o*-carborane (**11**). A Representative Procedure.

An oven-dried Schlenk flask equipped with a stir bar was charged with **3a** (198 mg, 0.5 mmol), PhX (X = Br or I; 1.5 mmol),  $\text{Pd}(\text{PPh}_3)_4$  (58 mg, 0.05 mmol) and  $t\text{BuOK}$  (168 mg, 1.5 mmol), followed by dry THF (7 mL). The flask was closed under an atmosphere of nitrogen and stirred at 80 °C for 24 h. After cooling to room temperature, water (10 mL) and 30%  $\text{H}_2\text{O}_2$  (5 mL) aqueous solution were successively added and the mixture was stirred at room temperature for 15 min.. After extraction with diethyl ether (10 mL x 3), the ether solutions were combined and concentrated to dryness in vacuo. The residue was subjected to flash column chromatography on silica gel (230-400 mesh) using *n*-hexane as eluent to give **11**.

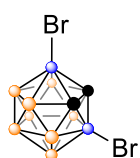

**11a**

**11a**: Yield 73%. White solid.  $^1\text{H}$  NMR ( $\text{CDCl}_3$ , 300 MHz):  $\delta$  4.14 (s, 2H) (cage CH);  $^{13}\text{C}\{^1\text{H}\}$  NMR ( $\text{CDCl}_3$ , 100 MHz):  $\delta$  63.4 (cage CH);  $^{11}\text{B}\{^1\text{H}\}$  NMR ( $\text{CDCl}_3$ , 128 MHz):  $\delta$  -1.8 (d,  $J_{\text{BH}} = 145$  Hz, 2B) ( $B_{\text{cageH}}$ ), -11.4 (m, 6B) ( $B_{\text{cage-Br}}$  &  $B_{\text{cageH}}$ ), 12.3 (d,  $J_{\text{BH}} =$

96 Hz, 2B) ( $B_{\text{cageH}}$ ); analysis (calcd., found for  $\text{C}_2\text{H}_{10}\text{B}_{10}\text{Br}_2$ ): C (7.95, 8.21), H (3.34, 3.33).

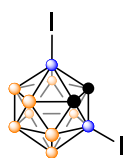

**11b**

**11b**: Yield 78%. White solid.  $^1\text{H}$  NMR ( $\text{CDCl}_3$ , 300 MHz):  $\delta$  4.13 (s, 2H) (cage CH);  $^{13}\text{C}\{^1\text{H}\}$  NMR ( $\text{CDCl}_3$ , 100 MHz):  $\delta$  64.3 (cage CH);  $^{11}\text{B}$  NMR ( $\text{CDCl}_3$ , 128 MHz):  $\delta$  -0.1 (d,  $J_{\text{BH}} = 151$  Hz, 2B), -8.7 (d,  $J_{\text{BH}} = 134$  Hz, 2B), -9.9 (d,  $J_{\text{BH}} = 162$  Hz, 4B)

( $B_{\text{cageH}}$ ), -27.8 (s, 2B) ( $B_{\text{cage-I}}$ ); analysis (calcd., found for  $\text{C}_2\text{H}_{10}\text{B}_{10}\text{I}_2$ ): C (6.07, 6.10), H (2.55, 2.53).



### Preparation of 3,6-Diacetoxy-*o*-carborane (**12**).

Compound **3a** (198 mg, 0.5 mmol), Cu(OAc)<sub>2</sub> (545 mg, 3 mmol), KF (175 mg, 3 mmol) and 4 Å molecular sieve (150 mg) were mixed in CH<sub>3</sub>CN (2.5 mL) in a 25 mL Schlenk flask. The mixture was heated at 80 °C under O<sub>2</sub> atmosphere (1 atm) for 12 h. After hydrolysis with water (10 mL) and extraction with diethyl ether (10 mL x 3), the ether solutions were combined and concentrated to dryness in vacuo. The residue was subjected to flash column chromatography on silica gel (230-400 mesh) using *n*-hexane/ethyl acetate (10/1 in v/v) as eluent to give **12** as a white solid (104 mg, 80%).

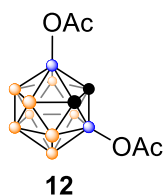

**12**: <sup>1</sup>H NMR (CDCl<sub>3</sub>, 300 MHz): δ 4.79 (s, 2H) (cage CH), 2.17 (s, 6H) (COCH<sub>3</sub>);

<sup>13</sup>C{<sup>1</sup>H} NMR (CDCl<sub>3</sub>, 100 MHz): δ 170.0 (C=O), 55.7 (cage CH), 22.5 (CH<sub>3</sub>); <sup>11</sup>B

NMR (CDCl<sub>3</sub>, 128 MHz): δ -4.3 (s, 2B) (*B*<sub>cage</sub>-O), -7.4 (d, *J*<sub>BH</sub> = 150 Hz, 2B) (*B*<sub>cage</sub>H),

-15.7 (d, *J*<sub>BH</sub> = 164 Hz, 4B) (*B*<sub>cage</sub>H), -18.1 (d, *J*<sub>BH</sub> = 156 Hz, 2B) (*B*<sub>cage</sub>H); analysis (calcd., found for C<sub>6</sub>H<sub>16</sub>B<sub>10</sub>O<sub>4</sub>): C (27.69, 27.66), H (6.20, 6.15).

### Preparation of 3,6-Diamino-*o*-carborane (**13**).

To a THF solution of MeONH<sub>2</sub> (6.0 mL, 3.0 mmol), prepared in situ from the reaction of MeONH<sub>2</sub> HCl (251 mg, 3.0 mmol) with NaH (85 mg, 3.5 mmol) at room temperature for 12 h, was slowly added <sup>n</sup>BuLi (1.6 M, 1.9 mL, 3.0 mmol) at -78 °C under an atmosphere of dry nitrogen. After stirring at room temperature for 30 min, a THF solution (4 mL) of **3a** (198 mg, 0.5 mmol) was added. The resulting mixture was heated in a closed flask at 80 °C for 8 h. After hydrolysis with water (10 mL) and extraction with diethyl ether (10 mL x 3), the ether solutions were combined and concentrated to dryness in vacuo. The residue was subjected to flash column chromatography on

silica gel (230-400 mesh) using *n*-hexane/ethyl acetate (4/1 in v/v) as eluent to give **13** as a white solid (78 mg, 90%).

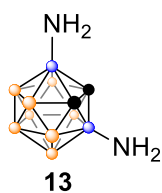

**13:**  $^1\text{H}$  NMR ( $\text{CDCl}_3$ , 400 MHz):  $\delta$  3.58 (s, 2H) (cage CH), 1.45 (s, 4H) ( $\text{NH}_2$ );

$^{13}\text{C}\{^1\text{H}\}$  NMR ( $\text{CDCl}_3$ , 125 MHz):  $\delta$  62.5 (cage CH);  $^{11}\text{B}$  NMR ( $\text{CDCl}_3$ , 128 MHz):  $\delta$

1.1 (s, 2B) ( $B_{\text{cage-N}}$ ), -6.4 (d,  $J_{\text{BH}} = 147$  Hz, 2B) ( $B_{\text{cageH}}$ ), -16.3 (d,  $J_{\text{BH}} = 158$  Hz, 4B)

( $B_{\text{cageH}}$ ), -19.1 (d,  $J_{\text{BH}} = 150$  Hz, 2B) ( $B_{\text{cageH}}$ ); analysis (calcd., found for  $\text{C}_2\text{H}_{14}\text{B}_{10}\text{N}_2$ ): C (13.79, 13.98), H (8.10, 8.07), N (16.08, 15.77).

#### Preparation of 3,6-Diazido-*o*-carborane (**14**).

To a THF suspension (3 mL) of **3a** (198 mg, 0.5 mmol), CuCl (104 mg, 1.05 mmol) and KF (70 mg, 1.2 mmol) was added  $\text{TMSN}_3$  (138 mg, 1.2 mmol). The resulting mixture was stirred at 60 °C for 24 h. After hydrolysis with water (10 mL) and extraction with diethyl ether (10 mL x 3), the ether solutions were combined and concentrated to dryness in vacuo. The residue was subjected to flash column chromatography on silica gel (230-400 mesh) using *n*-hexane/ethyl acetate (100/1 in v/v) as eluent to give the product **14** as a white solid (94 mg, 83%).

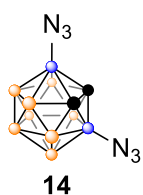

**14:**  $^1\text{H}$  NMR ( $\text{CDCl}_3$ , 300 MHz):  $\delta$  3.67 (s, 2H) (cage CH);  $^{13}\text{C}\{^1\text{H}\}$  NMR ( $\text{CDCl}_3$ , 75

MHz):  $\delta$  57.2 (cage CH);  $^{11}\text{B}$  NMR ( $\text{CDCl}_3$ , 128 MHz):  $\delta$  -4.2 (s, 2B) ( $B_{\text{cage-N}}$ ), -4.6 (d,

$J_{\text{BH}} = 117$  Hz, 2B) ( $B_{\text{cageH}}$ ), -14.6 (d,  $J_{\text{BH}} = 166$  Hz, 4B) ( $B_{\text{cageH}}$ ), -17.0 (d,  $J_{\text{BH}} = 153$  Hz,

2B) ( $B_{\text{cageH}}$ ); analysis (calcd., found for  $\text{C}_2\text{H}_{10}\text{B}_{10}\text{N}_6$ ): C (10.62, 10.46), H (4.45, 4.45), N (37.14, 37.05).

### Preparation of 3,6-Ditriazolyl-*o*-carborane by Click Reaction.

Compound **14** (68 mg, 0.3 mmol) and diethyl but-2-ynedioate (123 mg, 0.72 mmol) were dissolved in toluene (1 mL). The resulting mixture was stirred at 95 °C for 5 h. After removal of the solvent in vacuo, the residue recrystallized from *n*-hexane/diethyl ether (5/1 in v/v) to give **15** as a white solid (141 mg, 83%).

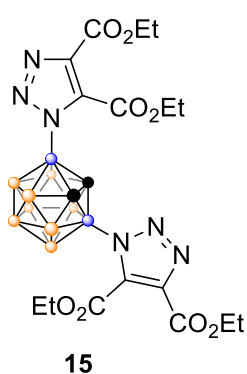

**15**:  $^1\text{H}$  NMR ( $\text{CDCl}_3$ , 300 MHz):  $\delta$  5.33 (s, 2H) (cage CH), 4.52 (q,  $J = 7.2$  Hz, 4H), 4.43 (q,  $J = 6.9$  Hz, 4H) ( $\text{CH}_2$ ), 1.45 (t,  $J = 7.2$  Hz, 6H), 1.39 (t,  $J = 7.2$  Hz, 6H) ( $\text{CH}_3$ ),  $^{13}\text{C}\{^1\text{H}\}$  NMR ( $\text{CDCl}_3$ , 75 MHz):  $\delta$  159.6, 159.2 (C=O), 139.2, 138.8 (olefinic C), 64.0, 62.1 (OCH<sub>2</sub>), 60.6 (cage CH), 14.2, 13.9 ( $\text{CH}_3$ ),  $^{11}\text{B}$  NMR ( $\text{CDCl}_3$ , 128 MHz):  $\delta$  -2.8 (m, 2B) ( $B_{\text{cageH}}$ ), -7.1 (s, 2B) ( $B_{\text{cage-N}}$ ), -12.9

(m, 6B) ( $B_{\text{cageH}}$ ); analysis (calcd., found for  $\text{C}_{18}\text{H}_{30}\text{B}_{10}\text{N}_6\text{O}_8$ ): C (38.16, 37.95), H (5.34, 5.31), N (14.83, 14.79).

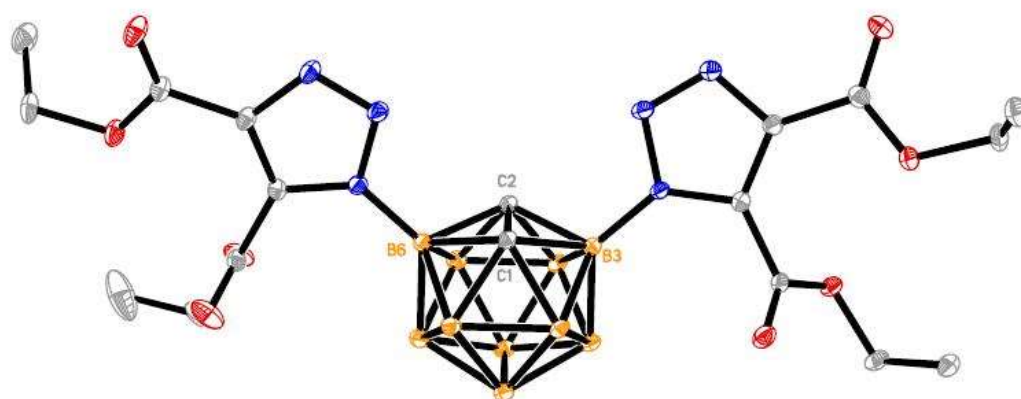

**Supplementary Figure 10.** Molecular structure of **15** drawn with 30% probability ellipsoids.

### Preparation of 3,6-[B(OH)<sub>2</sub>]<sub>2</sub>-*o*-Carborane (**16**).

To a solution of **3a** (396 mg, 1.0 mmol) in ether (15 mL) was added diethanolamine (260 mg, 2.5

mmol). After a few minutes, a white precipitate was formed, and the reaction was allowed to continue until the starting material was completely consumed as monitored by TLC (~18 h). The precipitate was then filtered off, washed with ether, and dried to afford a white solid. The solid was dispersed in ether (20 mL), to which was added HCl (0.5 M, 16 mL). The mixture was stirred till it became homogeneous. The resulting solution was extracted with ether (10 mL x 3), and the organic portions were combined and concentrated to dryness in vacuo to give the pure product **16** as a white solid (198 mg, 85%).

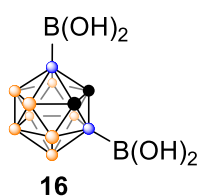

**16**: <sup>1</sup>H NMR (DMSO-*d*<sub>6</sub>, 300 MHz): δ 8.11 (s, 4H) (OH), 4.32 (s, 2H) (cage CH);

<sup>13</sup>C{<sup>1</sup>H} NMR (DMSO-*d*<sub>6</sub>, 100 MHz): δ 58.9 (cage CH); <sup>11</sup>B{<sup>1</sup>H} NMR (DMSO-*d*<sub>6</sub>,

128 MHz): δ 31.5 (s, 2B) (B–O), -2.0 (m, 2B), -6.9 (m, 2B), -11.3 (m, 6B) (B<sub>cage</sub>H);

analysis (calcd., found for C<sub>2</sub>H<sub>14</sub>B<sub>12</sub>O<sub>4</sub>): C (10.36, 10.24), H (6.09, 5.89).

## Supplementary Discussion

### Mechanistic Study (Control Experiments). NMR Tube Reactions

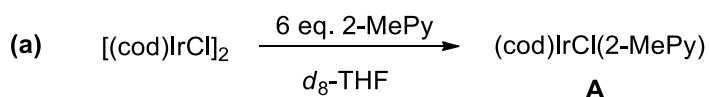

[(cod)IrCl]<sub>2</sub> (13.3 mg, 0.04 mmol) and 2-methylpyridine (2-MePy, 11.4 mg, 0.12 mmol) were mixed in *d*<sub>8</sub>-THF (0.5 mL) in a J. Young valve NMR tube in glovebox. The reaction was monitored by <sup>1</sup>H NMR at room temperature. After the solvent and excess 2-MePy were removed in vacuo, a clean <sup>1</sup>H NMR spectra of (cod)IrCl(2-MePy) (**A**) was obtained in *d*<sub>8</sub>-THF. Orange single crystals of complex **A** was obtained after this solution stood at room temperature for 1 day.

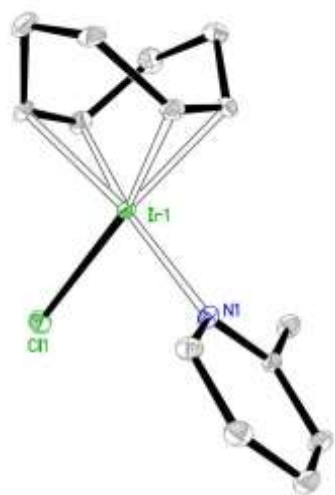

Supplementary Figure 11. Molecular structure of A drawn with 30% probability ellipsoids.

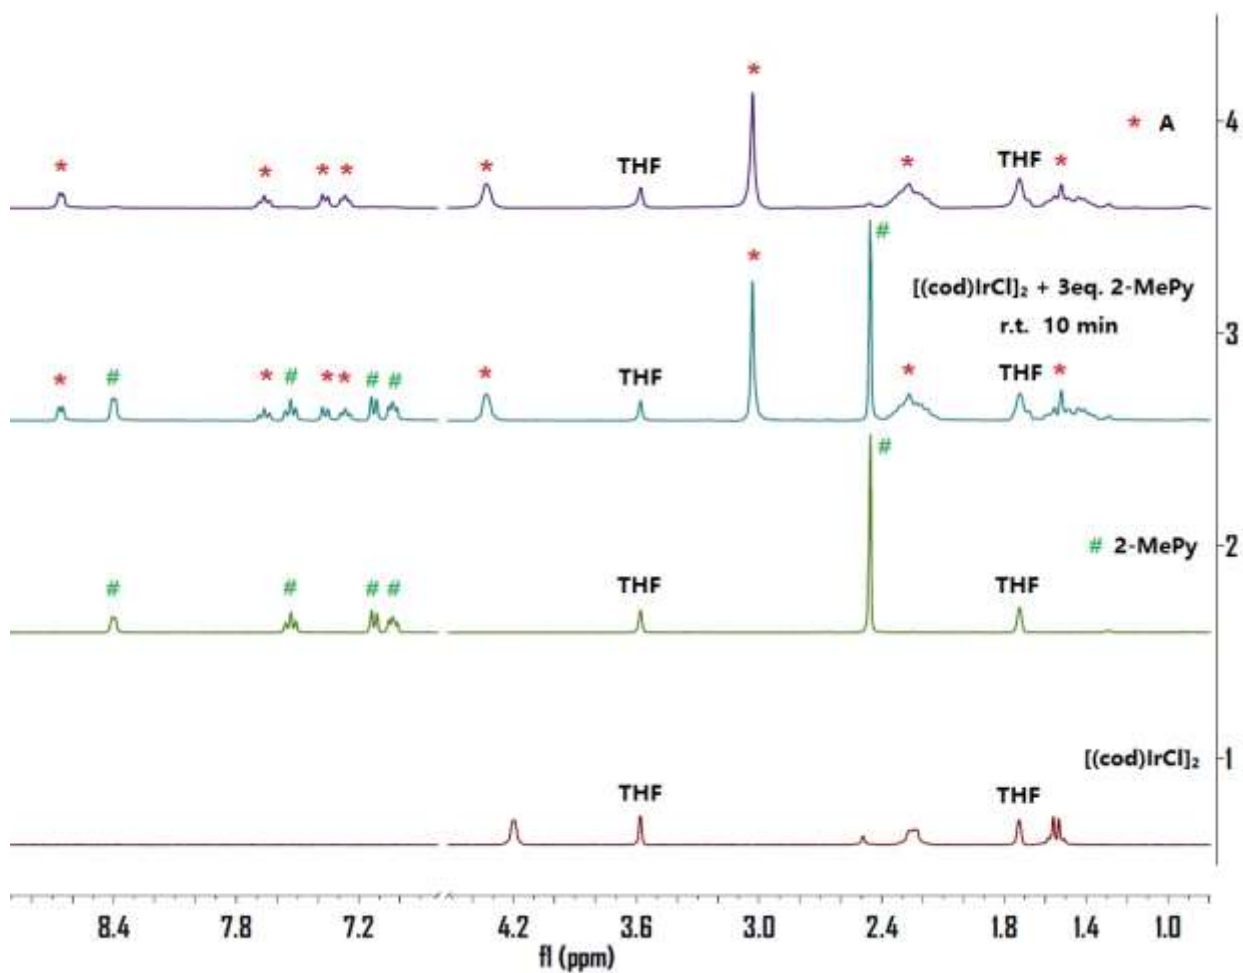

Supplementary Figure 12. <sup>1</sup>H NMR spectrum of experiment (a)

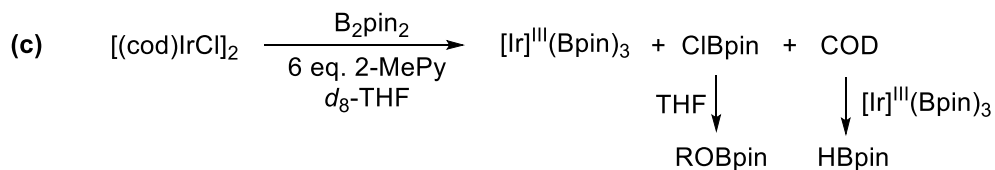

$\text{B}_2\text{pin}_2$  (10.1 mg, 0.04 mmol),  $[(\text{cod})\text{IrCl}]_2$  (13.3 mg, 0.04 mmol), and 2-methylpyridine (11.4 mg, 0.12 mmol) were mixed in  $d_8$ -THF (0.5 mL) in a J. Young valve NMR tube. The tube was closed and heated at 110 °C (bath temperature). The reaction was monitored by  $^{11}\text{B}$  NMR.

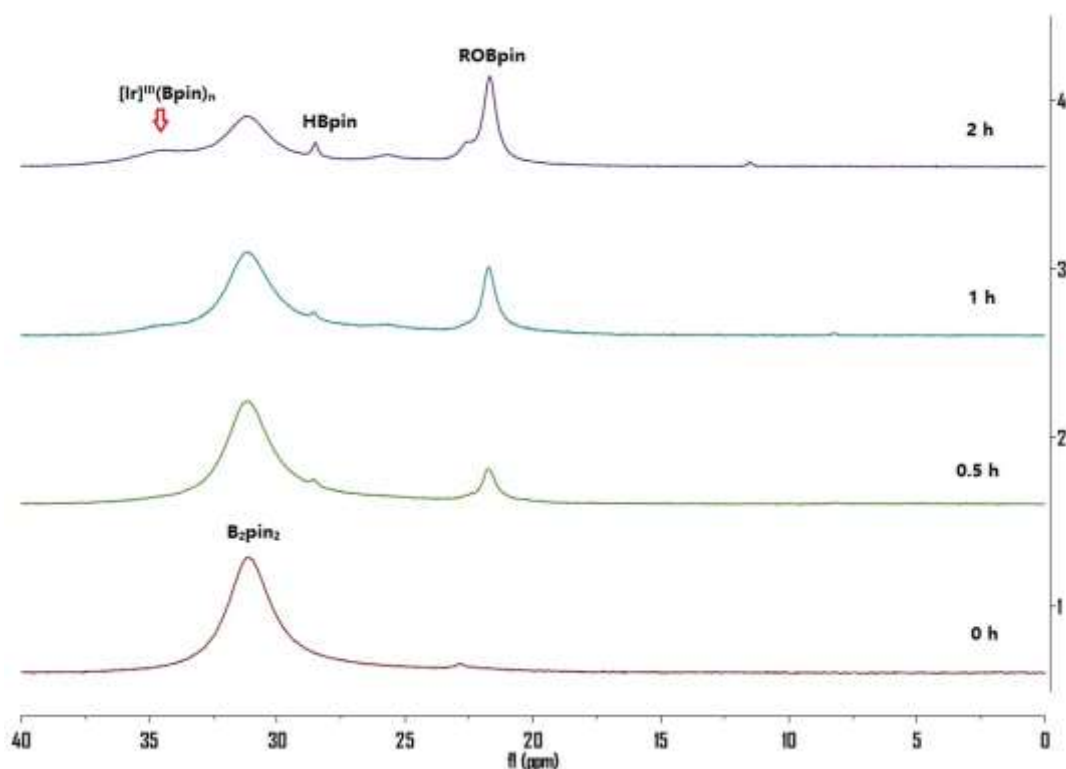

**Supplementary Figure 13.** Time-dependent  $^{11}\text{B}\{^1\text{H}\}$  NMR spectra of experiment (c)

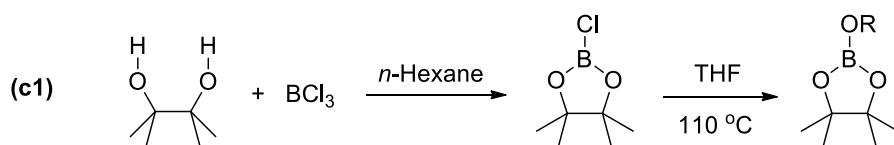

To a *n*-hexane solution (10 mL) of dry pinacol (60 mg, 0.50 mmol) was added dropwise  $\text{BCl}_3$  solution (0.75 mL, 1 M in hexane, 0.75 mmol) via syringe at 0 °C. The reaction mixture was stirred for 1 h at room temperature. The solution was condensed under vacuum to about 0.5 mL giving a

crude ClBpin solution.<sup>11</sup> The residue was dissolved in THF, which was monitored by <sup>11</sup>B NMR. The signal at 22 ppm corresponding to ROBpin resulted from the reaction of ClBpin with THF is in accordance with that observed in experiment (c).

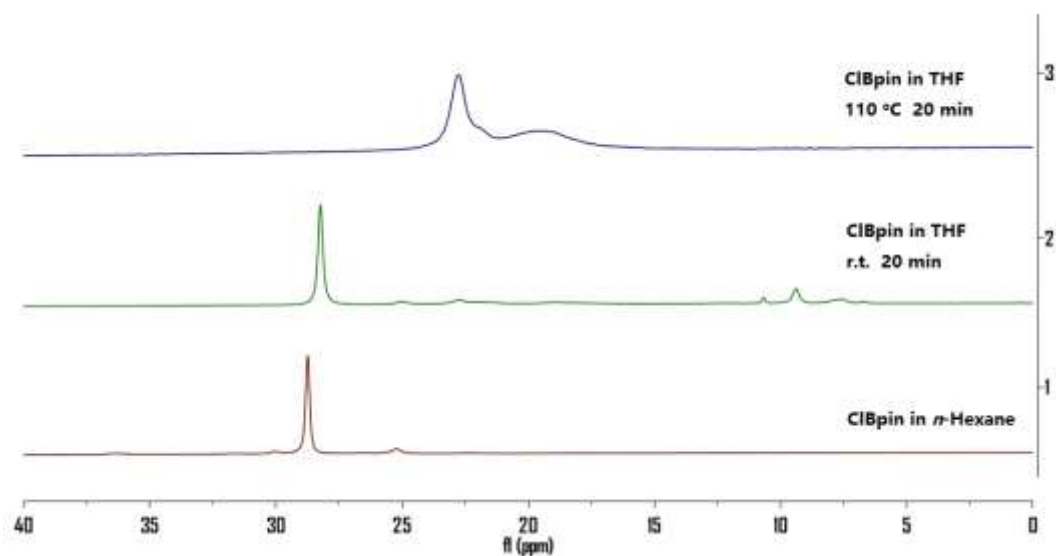

**Supplementary Figure 14.** Time-dependent <sup>11</sup>B{<sup>1</sup>H} NMR spectra of reaction (c1)

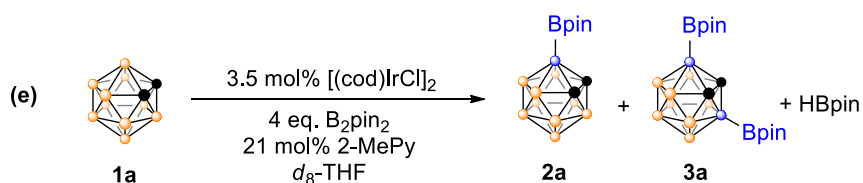

The reaction was conducted under standard conditions (4 equiv B<sub>2</sub>pin<sub>2</sub>, 3.5 mol% [(cod)IrCl]<sub>2</sub>, 21 mol% 2-methylpyridine) in d<sub>8</sub>-THF (0.5 mL) in a J. Young valve NMR tube and monitored by <sup>1</sup>H and <sup>11</sup>B NMR.

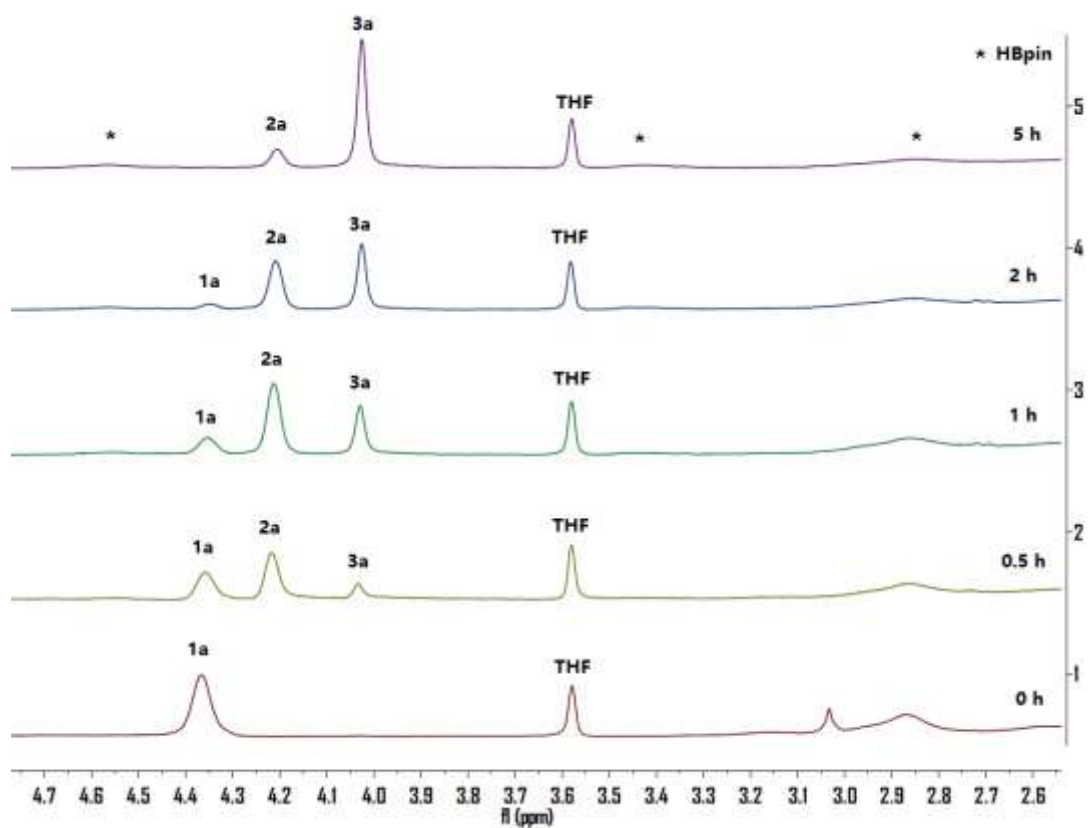

**Supplementary Figure 15.** Time-dependent  $^1\text{H}$  NMR spectra of experiment (e)

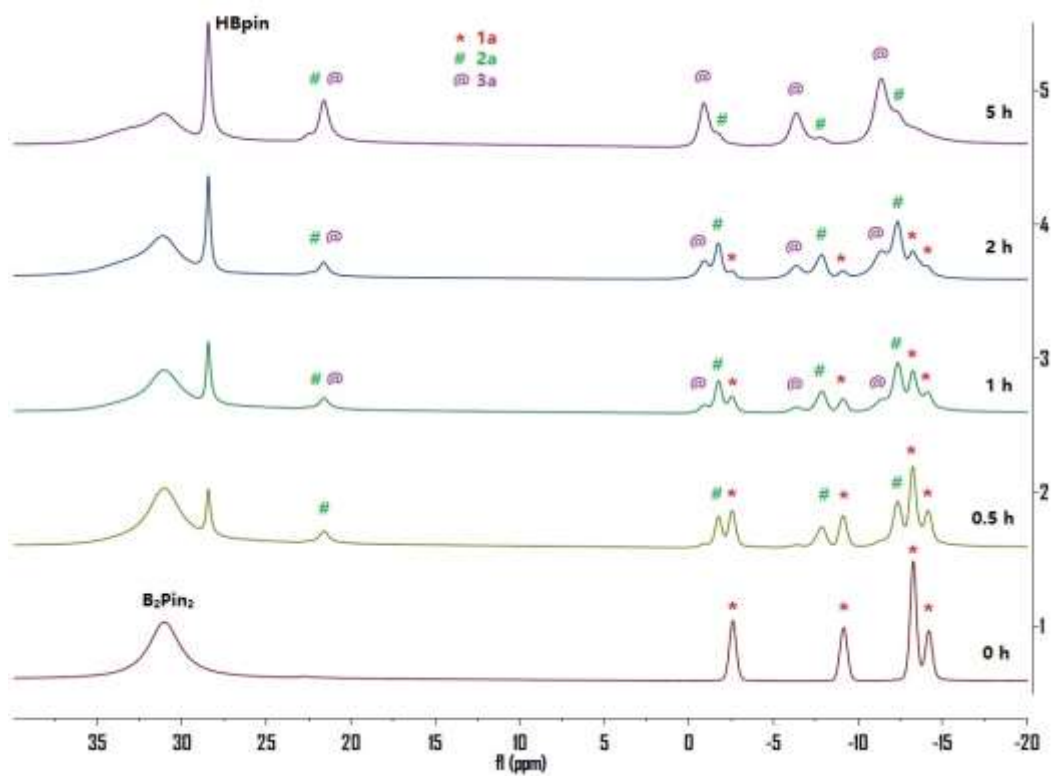

**Supplementary Figure 16.** Time-dependent  $^{11}\text{B}\{^1\text{H}\}$  NMR spectra of experiment (e)



### Borylation Reaction of **1a** Catalyzed by ( $\eta^6$ -MesH)Ir(Bpin)<sub>3</sub>

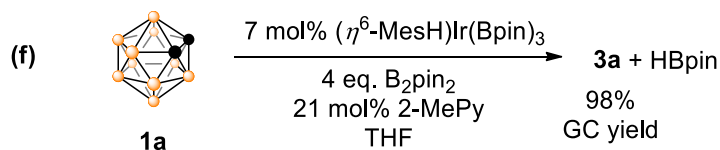

An oven-dried Schlenk flask equipped with a stir bar was charged with *o*-carborane **1a** (14.4 mg, 0.1 mmol), B<sub>2</sub>pin<sub>2</sub> (101.6 mg, 0.4 mmol), ( $\eta^6$ -MesH)Ir(Bpin)<sub>3</sub> (4.9 mg, 0.007 mmol), and 2-methylpyridine (2.0 mg, 0.021 mmol), followed by dry THF (1 mL). The flask was closed under an atmosphere of nitrogen and stirred at 110 °C (bath temperature) for 5 h. The reaction was then quenched with wet hexane. The hexane solution was subjected to GC-MS analyses, showing that **3a** was formed in 98% GC yield.

**X-ray Structure Determination.** All data were collected at 293K on a Bruker SMART 1000 CCD diffractometer using Mo-K $\alpha$  radiation. An empirical absorption correction was applied using the SADABS program.<sup>12</sup> All structures were solved by direct methods and subsequent Fourier difference techniques and refined anisotropically for all non-hydrogen atoms by full-matrix least squares calculations on F<sup>2</sup> using the SHELXTL program package.<sup>13</sup> All hydrogen atoms were geometrically fixed using the riding model. Crystal data and details of data collection and structure refinements are given in Table S5.

CCDC 1500326-1500335 (**2a**, **2p**, **2q**, **3a**, **3l**, **5**, **7c**, **8a**, **15** and complexes **A**) contains the supplementary crystallographic data for this paper. These data can be obtained free of charge from The Cambridge Crystallographic Data Centre via [www.ccdc.cam.ac.uk/data\\_request/cif](http://www.ccdc.cam.ac.uk/data_request/cif).

**Supplementary Table 5.** Crystal Data and Summary of Data Collection and Refinement.

| compound                                      | <b>3a</b>                                                      | <b>3l</b>                                                                     | <b>2p</b>                                                      | <b>2q</b>                                                                    | <b>2a</b>                                                     |
|-----------------------------------------------|----------------------------------------------------------------|-------------------------------------------------------------------------------|----------------------------------------------------------------|------------------------------------------------------------------------------|---------------------------------------------------------------|
| formula                                       | C <sub>14</sub> H <sub>34</sub> B <sub>12</sub> O <sub>4</sub> | C <sub>14</sub> H <sub>32</sub> B <sub>12</sub> I <sub>2</sub> O <sub>4</sub> | C <sub>22</sub> H <sub>33</sub> B <sub>11</sub> O <sub>2</sub> | C <sub>8</sub> H <sub>21</sub> B <sub>11</sub> I <sub>2</sub> O <sub>2</sub> | C <sub>8</sub> H <sub>23</sub> B <sub>11</sub> O <sub>2</sub> |
| crystal size (mm)                             | 0.25x0.22x0.15                                                 | 0.25x0.15x0.05                                                                | 0.15x0.1x0.02                                                  | 0.12x0.1x0.08                                                                | 0.28x0.25x0.20                                                |
| fw                                            | 396.13                                                         | 647.91                                                                        | 448.39                                                         | 521.96                                                                       | 270.17                                                        |
| crystal system                                | triclinic                                                      | monoclinic                                                                    | triclinic                                                      | monoclinic                                                                   | monoclinic                                                    |
| space group                                   | <i>P</i> -1                                                    | <i>P</i> 2 <sub>1</sub> / <i>c</i>                                            | <i>P</i> -1                                                    | <i>P</i> 2 <sub>1</sub> / <i>c</i>                                           | <i>P</i> 2 <sub>1</sub> / <i>n</i>                            |
| <i>a</i> , Å                                  | 11.531(6)                                                      | 11.871(1)                                                                     | 9.444(2)                                                       | 11.516(1)                                                                    | 6.734(2)                                                      |
| <i>b</i> , Å                                  | 12.628(7)                                                      | 13.081(1)                                                                     | 11.410(3)                                                      | 13.637(1)                                                                    | 20.302(5)                                                     |
| <i>c</i> , Å                                  | 18.211(10)                                                     | 17.992(1)                                                                     | 13.233(3)                                                      | 12.824(1)                                                                    | 12.248(3)                                                     |
| <i>α</i> , deg                                | 91.95(1)                                                       | 90                                                                            | 68.38(1)                                                       | 90                                                                           | 90                                                            |
| <i>β</i> , deg                                | 91.00(1)                                                       | 101.31(10)                                                                    | 80.64(1)                                                       | 102.71(1)                                                                    | 93.54(1)                                                      |
| <i>γ</i> , deg                                | 116.46(1)                                                      | 90                                                                            | 73.26(1)                                                       | 90                                                                           | 90                                                            |
| <i>V</i> , Å <sup>3</sup>                     | 2371(2)                                                        | 2739.6(3)                                                                     | 1266.8(5)                                                      | 1964.6(3)                                                                    | 1671.4(7)                                                     |
| <i>Z</i>                                      | 4                                                              | 4                                                                             | 2                                                              | 4                                                                            | 4                                                             |
| <i>D</i> <sub>calcd</sub> , Mg/m <sup>3</sup> | 1.110                                                          | 1.571                                                                         | 1.176                                                          | 1.765                                                                        | 1.074                                                         |
| radiation (λ) Å                               | 0.71073                                                        | 0.71073                                                                       | 0.71073                                                        | 0.71073                                                                      | 0.71073                                                       |
| 2θ range, deg                                 | 3.9 to 52.0                                                    | 3.5 to 61.2                                                                   | 4.0 to 60.0                                                    | 3.6 to 61.1                                                                  | 4.0 to 55.0                                                   |
| μ, mm <sup>-1</sup>                           | 0.066                                                          | 2.314                                                                         | 0.065                                                          | 3.197                                                                        | 0.058                                                         |
| <i>F</i> (000)                                | 840                                                            | 1256                                                                          | 472                                                            | 984                                                                          | 568                                                           |
| no. of obsd reflns                            | 9252                                                           | 8418                                                                          | 7243                                                           | 6019                                                                         | 3709                                                          |
| no. of params refnd                           | 558                                                            | 297                                                                           | 320                                                            | 212                                                                          | 194                                                           |
| goodness of fit                               | 1.026                                                          | 1.027                                                                         | 1.045                                                          | 1.034                                                                        | 0.955                                                         |
| R1                                            | 0.0858                                                         | 0.0441                                                                        | 0.0716                                                         | 0.0249                                                                       | 0.0881                                                        |
| wR2                                           | 0.1924                                                         | 0.1121                                                                        | 0.1691                                                         | 0.0548                                                                       | 0.2300                                                        |

| compound                                     | <b>5</b>                                                      | <b>7c</b>                                                                        | <b>8a</b>                                                     | <b>15</b>                                                                     | <b>A</b>                              |
|----------------------------------------------|---------------------------------------------------------------|----------------------------------------------------------------------------------|---------------------------------------------------------------|-------------------------------------------------------------------------------|---------------------------------------|
| formula                                      | C <sub>8</sub> H <sub>23</sub> B <sub>11</sub> O <sub>2</sub> | C <sub>14</sub> H <sub>35</sub> B <sub>11</sub> I <sub>2</sub> O <sub>2</sub> Si | C <sub>8</sub> H <sub>23</sub> B <sub>11</sub> O <sub>2</sub> | C <sub>18</sub> H <sub>30</sub> B <sub>10</sub> N <sub>6</sub> O <sub>8</sub> | C <sub>14</sub> H <sub>19</sub> ClIrN |
| crystal size (mm)                            | 0.25x0.2x0.18                                                 | 0.18x0.165x0.12                                                                  | 0.32x0.28x0.25                                                | 0.25 x 0.22 x 0.2                                                             | 0.15x0.1x0.05                         |
| fw                                           | 270.17                                                        | 636.22                                                                           | 270.17                                                        | 566.58                                                                        | 428.95                                |
| crystal system                               | monoclinic                                                    | orthorhombic                                                                     | monoclinic                                                    | triclinic                                                                     | monoclinic                            |
| space group                                  | <i>P2<sub>1</sub>/c</i>                                       | <i>Pbca</i>                                                                      | <i>P2<sub>1</sub>/n</i>                                       | <i>P-1</i>                                                                    | <i>P2<sub>1</sub>/c</i>               |
| <i>a</i> , Å                                 | 8.374(3)                                                      | 12.192(2)                                                                        | 6.699(1)                                                      | 7.088(1)                                                                      | 10.507(1)                             |
| <i>b</i> , Å                                 | 18.502(7)                                                     | 14.089(2)                                                                        | 20.308(2)                                                     | 13.346(1)                                                                     | 10.840(1)                             |
| <i>c</i> , Å                                 | 10.724(4)                                                     | 33.150(5)                                                                        | 12.120(1)                                                     | 15.578(2)                                                                     | 12.435(1)                             |
| <i>α</i> , deg                               | 90                                                            | 90                                                                               | 90                                                            | 77.22(1)                                                                      | 90                                    |
| <i>β</i> , deg                               | 91.29(1)                                                      | 90                                                                               | 93.87(1)                                                      | 79.09(1)                                                                      | 107.49(1)                             |
| <i>γ</i> , deg                               | 90                                                            | 90                                                                               | 90                                                            | 79.59(1)                                                                      | 90                                    |
| <i>V</i> , Å <sup>3</sup>                    | 1661.1(11)                                                    | 5694.0(15)                                                                       | 1645.1(3)                                                     | 1396.2(3)                                                                     | 1350.6(2)                             |
| <i>Z</i>                                     | 4                                                             | 8                                                                                | 4                                                             | 2                                                                             | 4                                     |
| <i>D<sub>calcd</sub></i> , Mg/m <sup>3</sup> | 1.080                                                         | 1.484                                                                            | 1.091                                                         | 1.348                                                                         | 2.110                                 |
| radiation (λ) Å                              | 0.71073                                                       | 0.71073                                                                          | 0.71073                                                       | 0.71073                                                                       | 0.71073                               |
| 2θ range, deg                                | 2.2 to 55.4                                                   | 4.6 to 39.2                                                                      | 5.2 to 58.5                                                   | 3.2 to 61.2                                                                   | 4.1 to 613                            |
| <i>μ</i> , mm <sup>-1</sup>                  | 0.059                                                         | 2.261                                                                            | 0.059                                                         | 0.096                                                                         | 10.061                                |
| <i>F</i> (000)                               | 568                                                           | 2480                                                                             | 568                                                           | 588                                                                           | 816                                   |
| no. of obsd reflns                           | 3849                                                          | 6601                                                                             | 5052                                                          | 8460                                                                          | 4152                                  |
| no. of params refnd                          | 194                                                           | 280                                                                              | 244                                                           | 383                                                                           | 155                                   |
| goodness of fit                              | 1.007                                                         | 1.169                                                                            | 1.050                                                         | 1.044                                                                         | 1.024                                 |
| R1                                           | 0.0692                                                        | 0.0765                                                                           | 0.0770                                                        | 0.0523                                                                        | 0.0242                                |
| wR2                                          | 0.1721                                                        | 0.2001                                                                           | 0.2009                                                        | 0.1254                                                                        | 0.0559                                |

## Supplementary References

- (1) Andrews, J. S., Zayas, J. & Jones, M. Jr. 9-Iodo-*o*-carborane. *Inorg. Chem.* **24**, 3715–3716 (1985).
- (2) (a) Li, J., Logan, C. F. & Jones, M. Jr. Simple syntheses and alkylation reactions of 3-iodo-*o*-carborane and 9,12-diiodo-*o*-carborane. *Inorg. Chem.* **30**, 4866–4868 (1991).
- (3) Zheng, Z., Jiang, W., Zinn, A. A., Knobler, C. B. & Hawthorne, M. F. Facile electrophilic iodination of icosahedral carboranes. Synthesis of carborane derivatives with boron-carbon bonds via the palladium-catalyzed reaction of diiodocarboranes with grignard reagents. *Inorg. Chem.* **34**, 2095–2100 (1995).
- (4) Spokoyny, A. M., Li, T. C., Farha, O. K., Machan, C. W., She, C., Stern, C. L., Marks, T. J., Hupp, J. T. & Mirkin, C. A. Electronic tuning of nickel-based bis(dicarbollide) redox shuttles in dye-sensitized solar cells. *Angew. Chem. Int. Ed.* **49**, 5339–5343 (2010).
- (5) Kabytaev, K. Z., Safronov, A. V., Jalisatgi, S. S. & Hawthorne, M. F. Synthesis and reactions of B-vinylcarboranes. *J. Organomet. Chem.* **749**, 106–108 (2014).
- (6) Bhaskar, M. R., Carolyn, B. K. & Hawthorne, M. F. Synthesis and structural characterization of symmetrical *closo*-4,7-I<sub>2</sub>-1,2-C<sub>2</sub>B<sub>10</sub>H<sub>10</sub> and [(CH<sub>3</sub>)<sub>3</sub>NH][*nido*-2,4-I<sub>2</sub>-7,8-C<sub>2</sub>B<sub>9</sub>H<sub>10</sub>]. *Inorg. Chem.* **45**, 336–340 (2006).
- (7) Quan, Y. & Xie, Z. Iridium catalyzed regioselective cage boron alkenylation of *o*-carboranes via direct cage B–H activation. *J. Am. Chem. Soc.* **136**, 15513–15516 (2014).

- (8) Zhao, D., Zhang, J. J. & Xie, Z. 1,3-Dehydro-*o*-carborane: generation and reaction with arenes. *Angew. Chem. Int. Ed.* **53**, 8488–8491 (2014).
- (9) Gomezl, F. A. & Hawthorne, M. F. A simple route to C-monosubstituted carborane derivatives. *J. Org. Chem.* **57**, 1384–1390 (1992).
- (10) Li, Q., Liskey, C. W. & Hartwig, J. F. Regioselective borylation of the C–H bonds in alkylamines and alkyl ethers. Observation and origin of high reactivity of primary C–H bonds beta to nitrogen and oxygen. *J. Am. Chem. Soc.* **136**, 8755–8765 (2014).
- (11) Waltz, K. M. & Hartwig, J. F. Functionalization of alkanes by isolated transition metal boryl complexes. *J. Am. Chem. Soc.* **122**, 11358–11369 (2000).
- (12) Sheldrick, G. M. *SADABS: Program for Empirical Absorption Correction of Area Detector Data*. (University of Göttingen: Germany, 1996).
- (13) Sheldrick, G. M. *SHELXTL 5.10 for Windows NT: Structure Determination Software Programs*. (Bruker Analytical X-ray Systems, Inc., Madison, Wisconsin, USA, 1997).

crf-3-67-H-CDCl3

7.260  
7.233  
7.209  
7.184  
7.094  
7.070  
7.039  
7.015

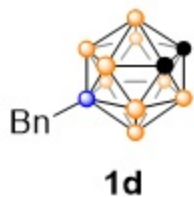

3.444  
3.392

2.211

| Parameter        | Value               |
|------------------|---------------------|
| Title            | crf-3-67-2          |
| Comment          | STANDARD IN CHEMIST |
| Origin           | Varian              |
| Owner            |                     |
| Site             |                     |
| Spectrometer     | mercury             |
| Author           | onc                 |
| Solvent          | CDCl3               |
| Temperature      | 21.0                |
| Pulse Sequence   | sgul                |
| Number of Scans  | 8                   |
| Receiver Gain    | 21                  |
| Relaxation Delay | 1.0000              |
| Pulse Width      | 0.0000              |
| Acquisition Date | 2015-01-28 08:16    |
| Spectrometer     | 300.03              |
| Frequency        |                     |
| Spectral Width   | 5494.5              |
| Lowest Frequency | -70.0               |
| Nucleus          | 1H                  |
| Acquired Size    | 10376               |
| Spectral Size    | 3268                |

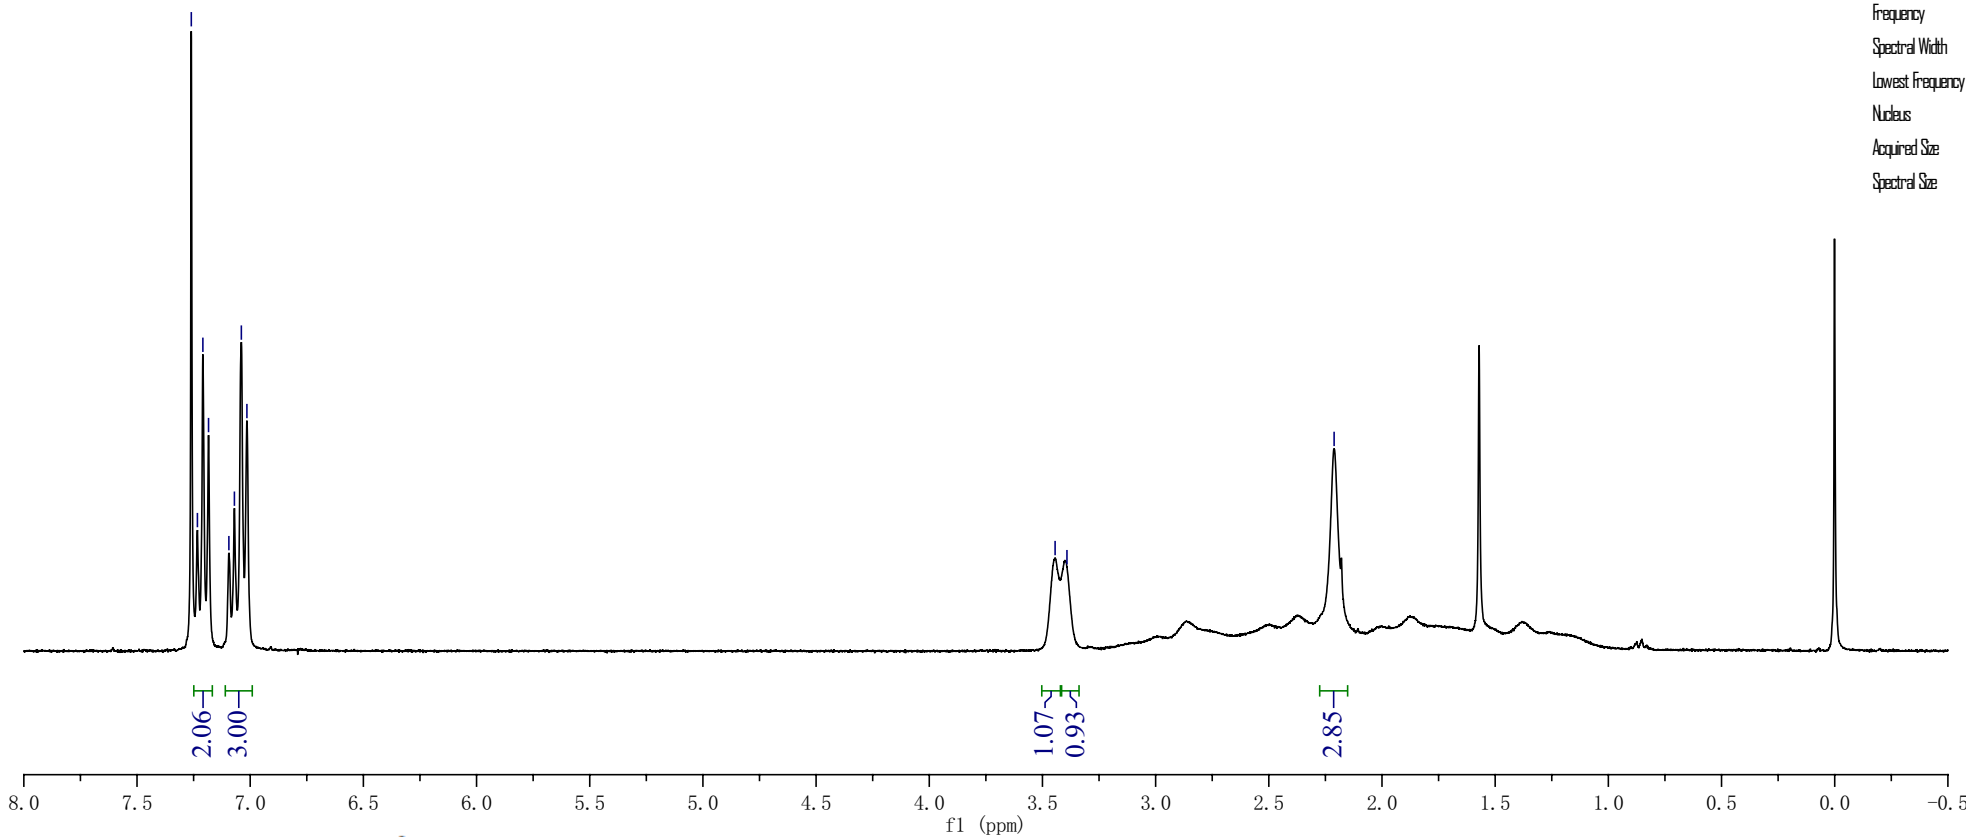

Supplementary Figure 17. <sup>1</sup>H NMR Spectrum of 1d.

crf-3-67-C-CDCl3

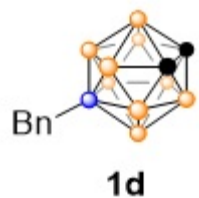

144.688

128.460  
127.964

124.076

77.588  
77.160  
76.750

53.335

48.458

| Parameter              | Value               |
|------------------------|---------------------|
| Title                  | crf-3-67-C-CDCl3    |
| Comment                | 13C OBSERVE         |
| Origin                 | Varian              |
| Owner                  |                     |
| Site                   |                     |
| Spectrometer           | mercury             |
| Author                 | omc                 |
| Solvent                | CDCl3               |
| Temperature            | 29.0                |
| Pulse Sequence         | zgpg30              |
| Number of Scans        | 128                 |
| Receiver Gain          | 34                  |
| Relaxation Delay       | 1.0000              |
| Pulse Width            | 0.0000              |
| Acquisition Date       | 2016-03-28T18:51:17 |
| Spectrometer Frequency | 76.46               |
| Spectral Width         | 1901.4              |
| Lowest Frequency       | 4735.0              |
| Nucleus                | 13C                 |
| Acquired Size          | 2537                |
| Spectral Size          | 65535               |

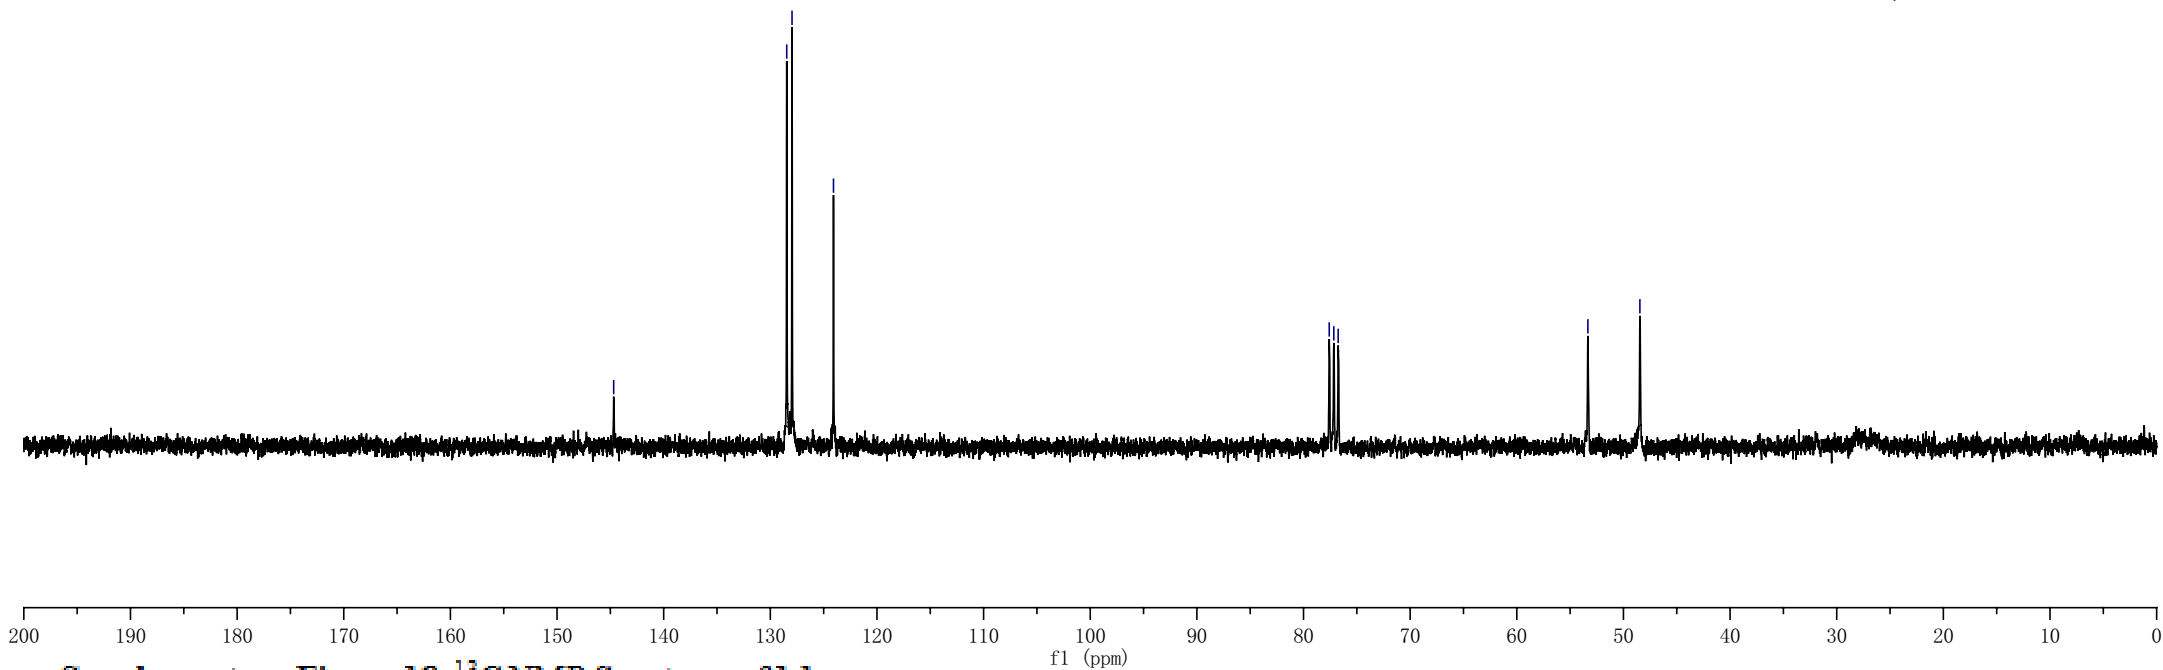

Supplementary Figure 18. <sup>13</sup>C NMR Spectrum of 1d.

crf-3-67-B-coupling-CDC13

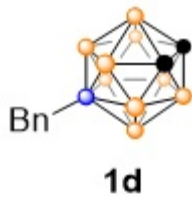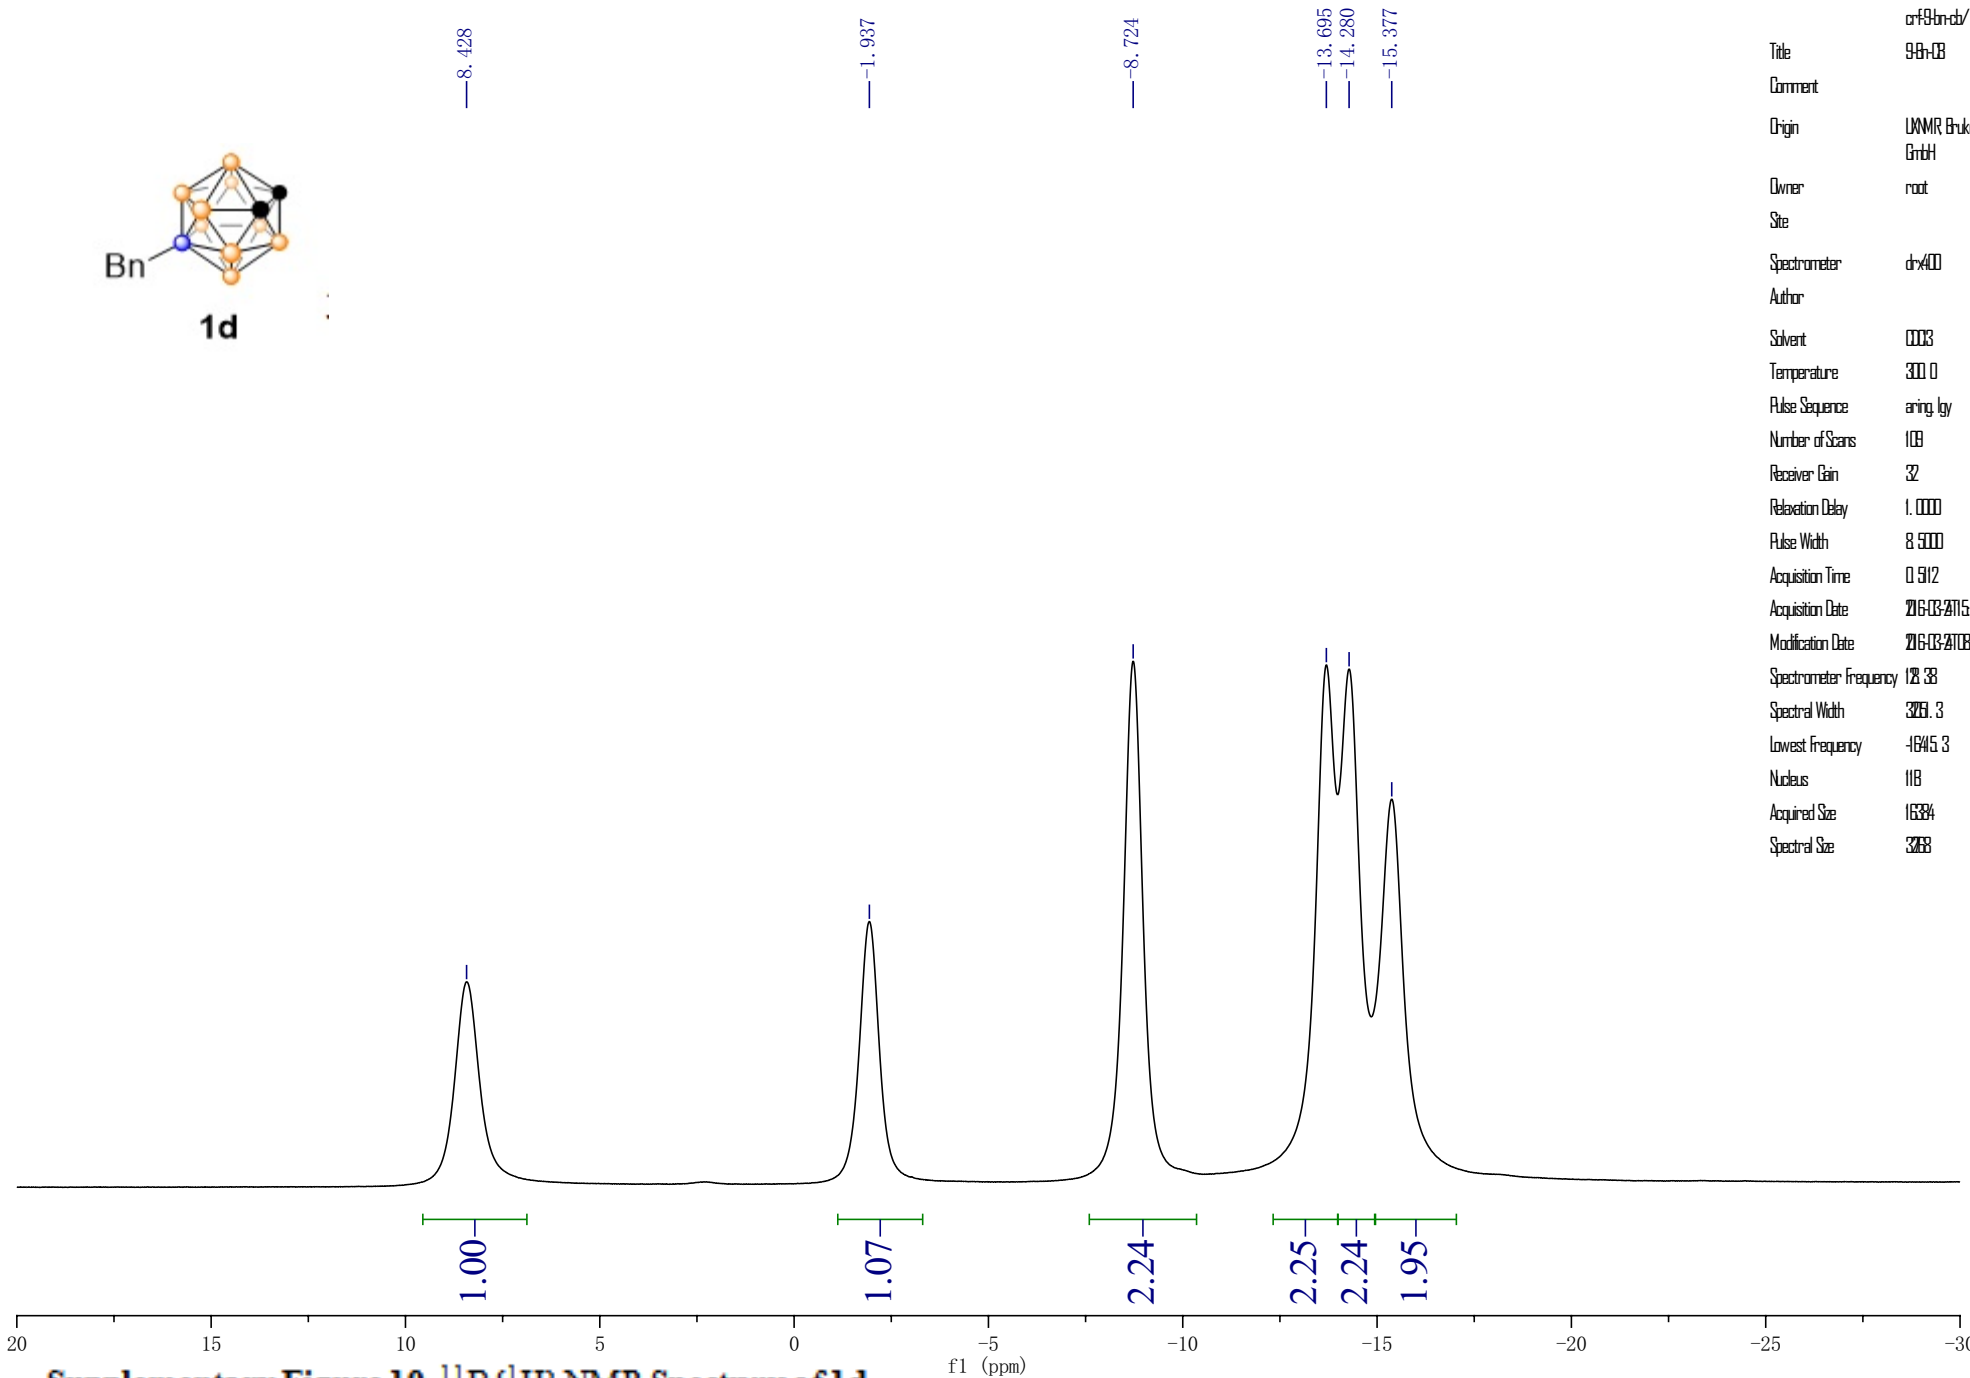

| Parameter              | Value                                           |
|------------------------|-------------------------------------------------|
| Data File Name         | E:/boralation/boralation/98-08/b-crif98bn-cb/1d |
| Title                  | 98-08                                           |
| Comment                |                                                 |
| Origin                 | UNMR Bruker Analytische Messtechnik GmbH        |
| Owner                  | root                                            |
| Site                   |                                                 |
| Spectrometer           | dmx400                                          |
| Author                 |                                                 |
| Solvent                | CDCl3                                           |
| Temperature            | 300.0                                           |
| Pulse Sequence         | aning.tgy                                       |
| Number of Scans        | 100                                             |
| Receiver Gain          | 32                                              |
| Relaxation Delay       | 1.0000                                          |
| Pulse Width            | 8.5000                                          |
| Acquisition Time       | 0.512                                           |
| Acquisition Date       | 2016-03-20 15:28:10                             |
| Modification Date      | 2016-03-21 08:32:00                             |
| Spectrometer Frequency | 128.38                                          |
| Spectral Width         | 3261.3                                          |
| Lowest Frequency       | -1645.3                                         |
| Nucleus                | 11B                                             |
| Acquired Size          | 16384                                           |
| Spectral Size          | 3268                                            |

Supplementary Figure 19.  $^{11}\text{B}\{^1\text{H}\}$  NMR Spectrum of **1d**.



crf-3-67-B-coupling-CDC13

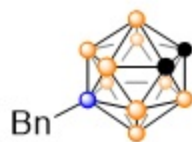

**1d**

8.416

-1.359

-2.514

-8.147

-9.311

-13.071

-13.666

-14.798

-16.069

| Parameter              | Value                                                      |
|------------------------|------------------------------------------------------------|
| Data File Name         | E:/boralation/boralation/98b-OB/b-cr-f9b-cr-cb-coupling/1d |
| Title                  | 98b-OB                                                     |
| Comment                |                                                            |
| Origin                 | UNMR Bruker Analytische Messtechnik GmbH                   |
| Owner                  | root                                                       |
| Site                   |                                                            |
| Spectrometer           | dmx400                                                     |
| Author                 |                                                            |
| Solvent                | CDCl <sub>3</sub>                                          |
| Temperature            | 300.0                                                      |
| Pulse Sequence         | aring-1g                                                   |
| Number of Scans        | 256                                                        |
| Receiver Gain          | 32                                                         |
| Relaxation Delay       | 1.0000                                                     |
| Pulse Width            | 8.5000                                                     |
| Acquisition Time       | 0.512                                                      |
| Acquisition Date       | 2016-03-21T15:33:58                                        |
| Modification Date      | 2016-03-21T18:38:00                                        |
| Spectrometer Frequency | 128.38                                                     |
| Spectral Width         | 3261.3                                                     |
| Lowest Frequency       | -16415.3                                                   |
| Nucleus                | 11B                                                        |
| Acquired Size          | 16384                                                      |
| Spectral Size          | 3268                                                       |

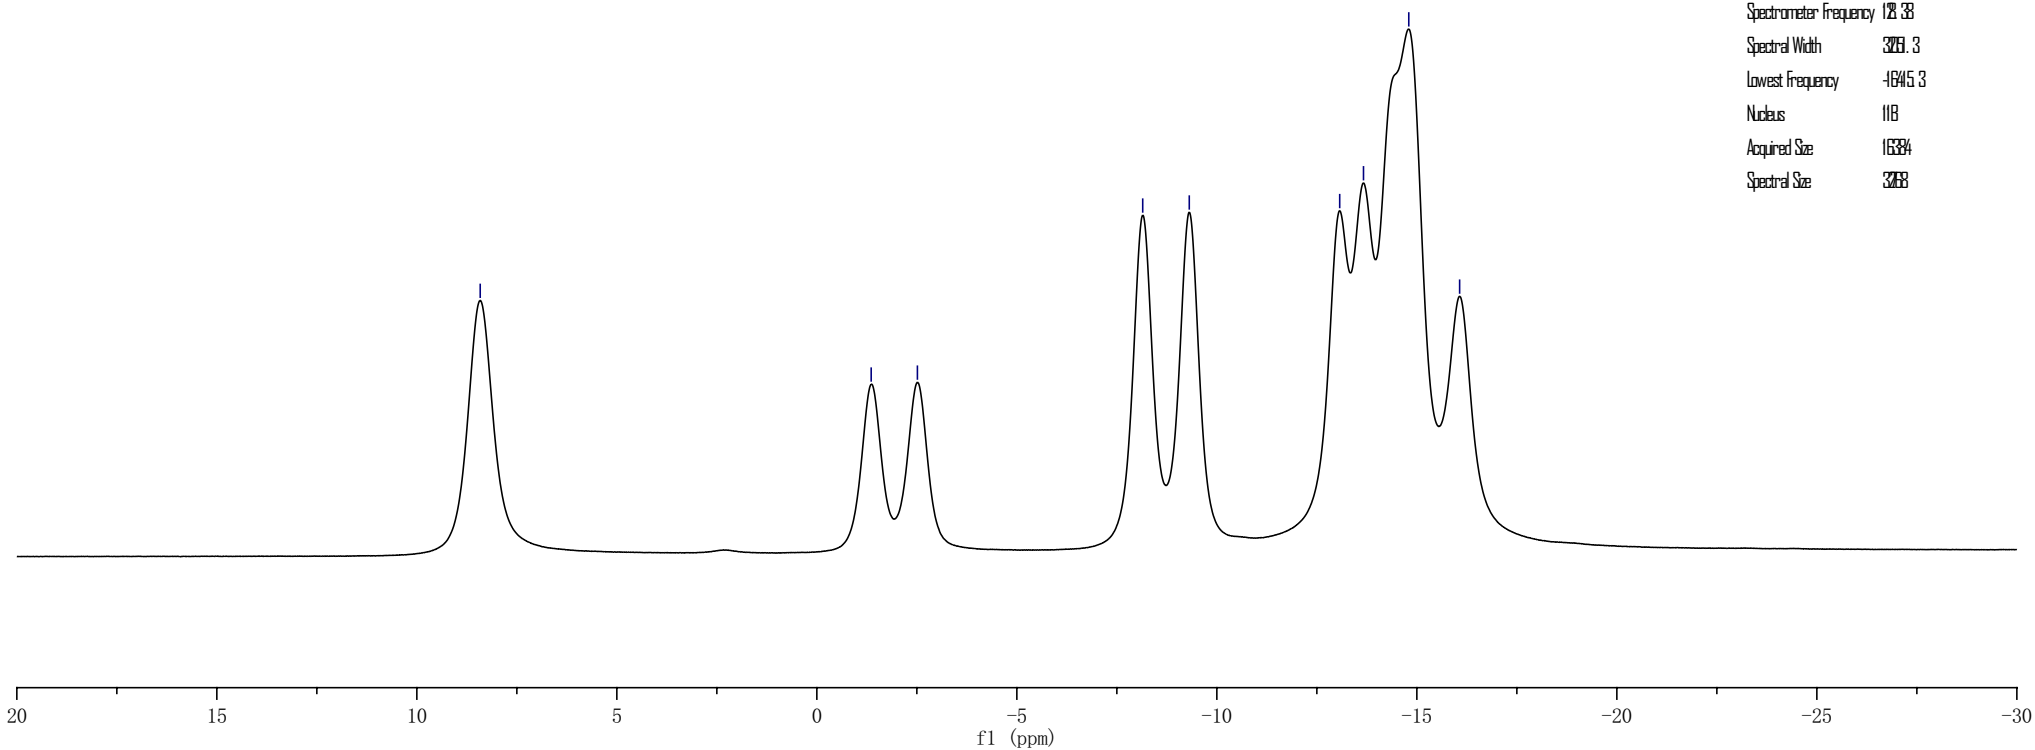

Supplementary Figure 20. <sup>11</sup>B NMR Spectrum of 1d.

crf-4-41-H-CDCl3

7.512  
7.492

7.121  
7.105  
7.101  
7.080  
7.062  
7.035

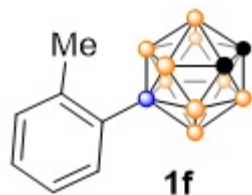

3.584  
3.546

2.490

| Parameter              | Value               |
|------------------------|---------------------|
| Title                  | crf-4-41            |
| Comment                | STANDARD 1H OBSERVE |
| Origin                 | Varian              |
| Owner                  |                     |
| Site                   |                     |
| Spectrometer           | mercury             |
| Author                 | cmc                 |
| Solvent                | CDCl3               |
| Temperature            | 28.0                |
| Pulse Sequence         | zgpg30              |
| Number of Scans        | 8                   |
| Receiver Gain          | 28                  |
| Relaxation Delay       | 1.0000              |
| Pulse Width            | 0.0000              |
| Acquisition Date       | 2015-04-17 15:58:26 |
| Spectrometer Frequency | 300.133             |
| Spectral Width         | 5464.5              |
| Lowest Frequency       | -709.9              |
| Nucleus                | 1H                  |
| Acquired Size          | 10876               |
| Spectral Size          | 3268                |

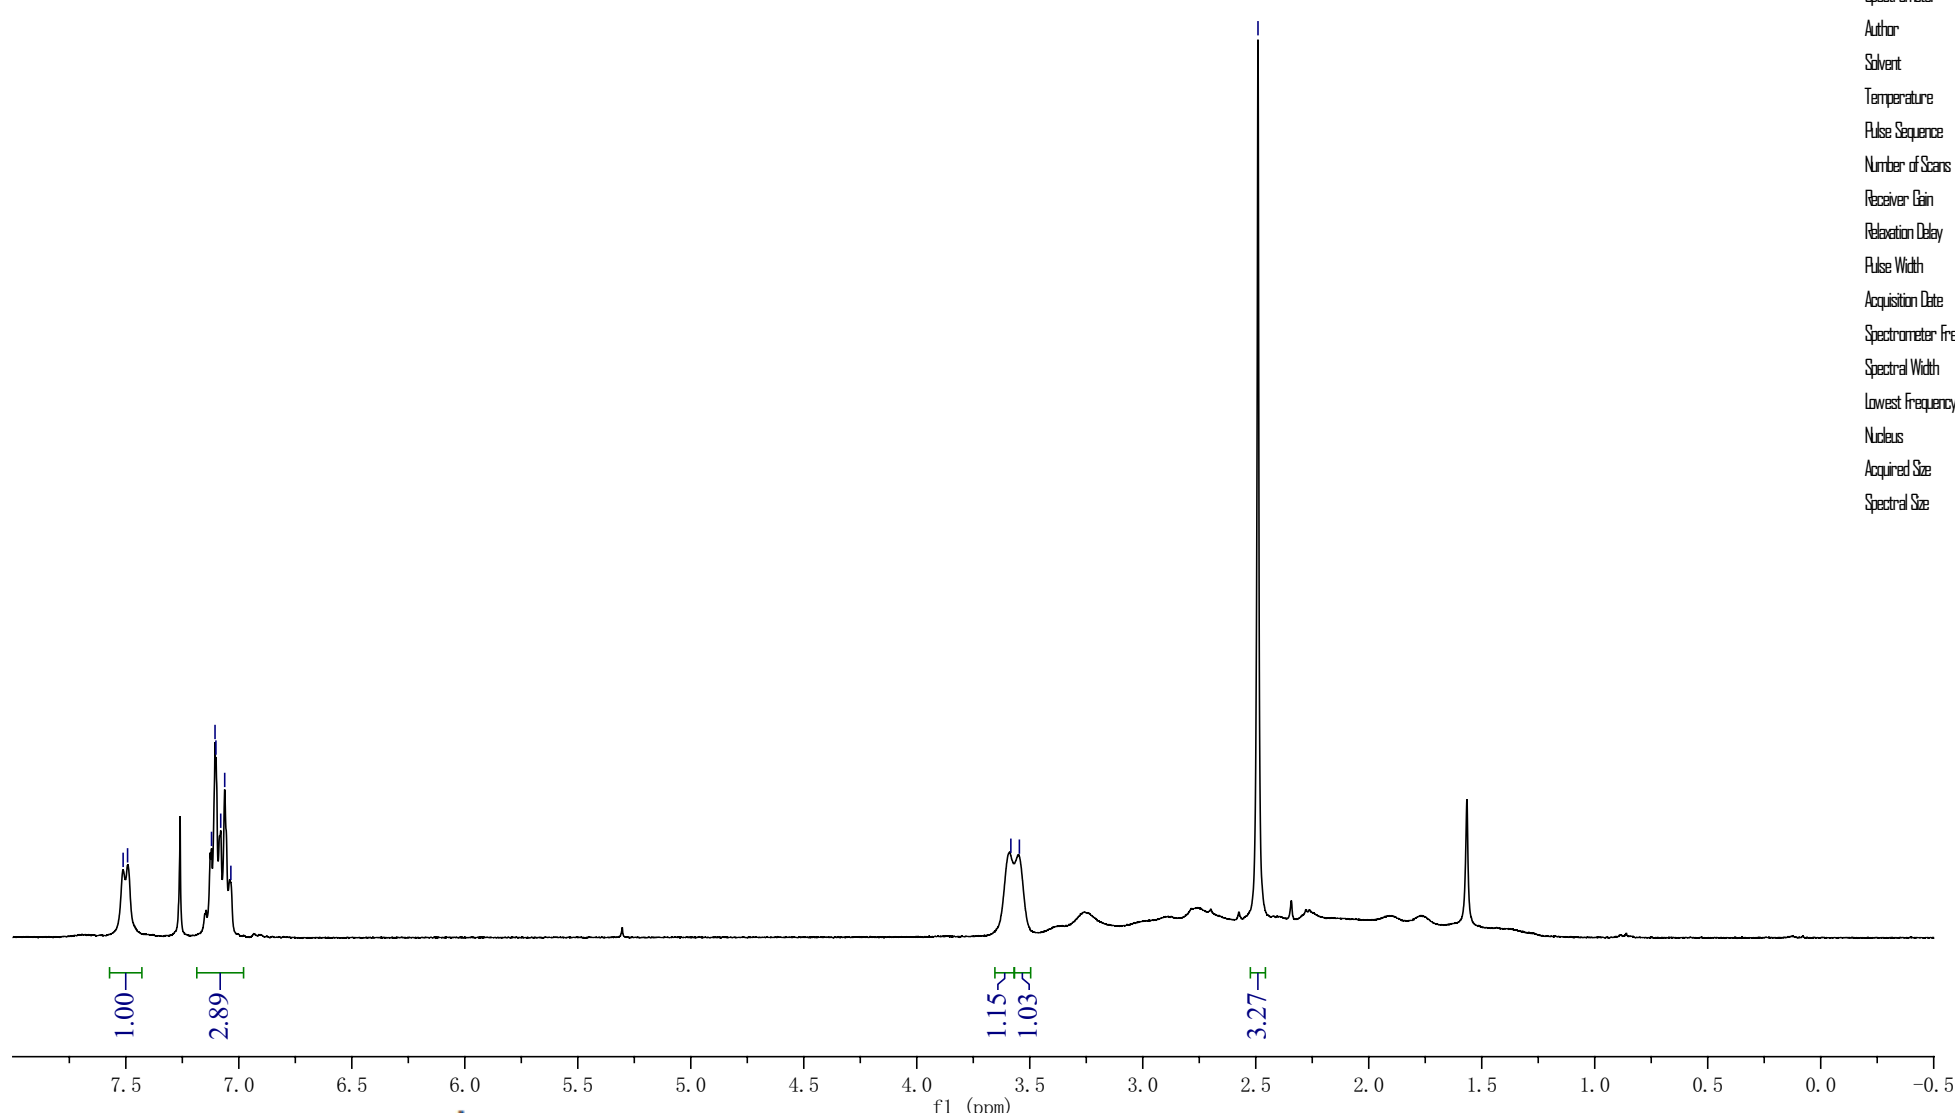

Supplementary Figure 21. <sup>1</sup>H NMR Spectrum of 1f.

crf-4-41-C-CDCl3

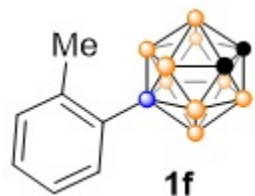

141.686  
135.958  
130.351  
127.524  
124.973

77.585  
77.160  
76.737

53.138  
50.490

24.065

| Parameter              | Value               |
|------------------------|---------------------|
| Title                  | crf34g-C            |
| Comment                | 13C OBSERVE         |
| Origin                 | Varian              |
| Owner                  |                     |
| Site                   |                     |
| Spectrometer           | mercury             |
| Author                 | omc                 |
| Solvent                | CDCl3               |
| Temperature            | 21.0                |
| Pulse Sequence         | zgpg30              |
| Number of Scans        | 120                 |
| Receiver Gain          | 34                  |
| Relaxation Delay       | 1.0000              |
| Pulse Width            | 0.0000              |
| Acquisition Date       | 2016-03-20 12:50:41 |
| Spectrometer Frequency | 76.45               |
| Spectral Width         | 1901.4              |
| Lowest Frequency       | -4735.0             |
| Nucleus                | 13C                 |
| Acquired Size          | 2617                |
| Spectral Size          | 65536               |

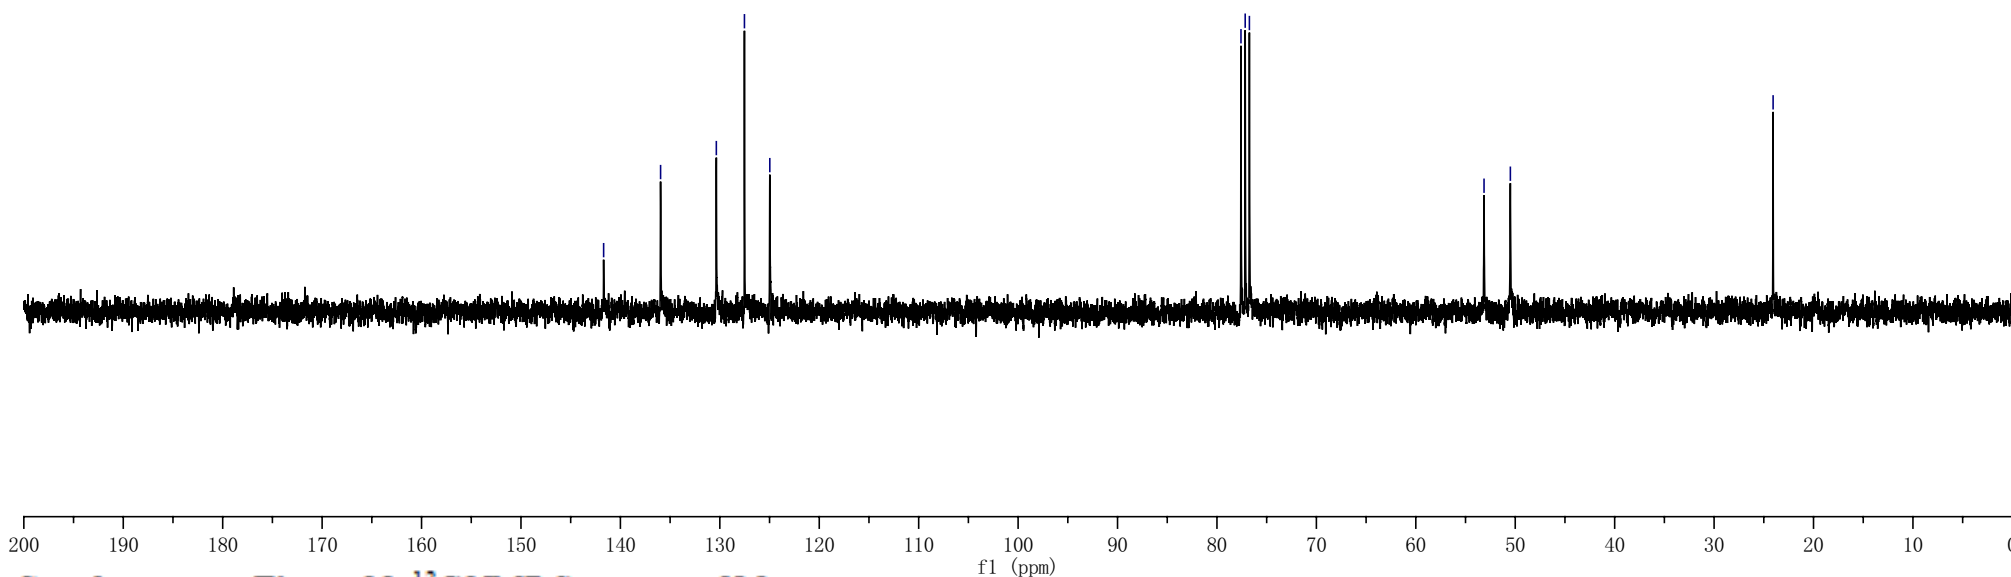

Supplementary Figure 22. <sup>13</sup>C NMR Spectrum of 1f.

crf-4-41-B-decoupling-CDC13

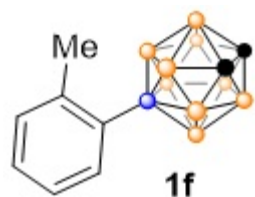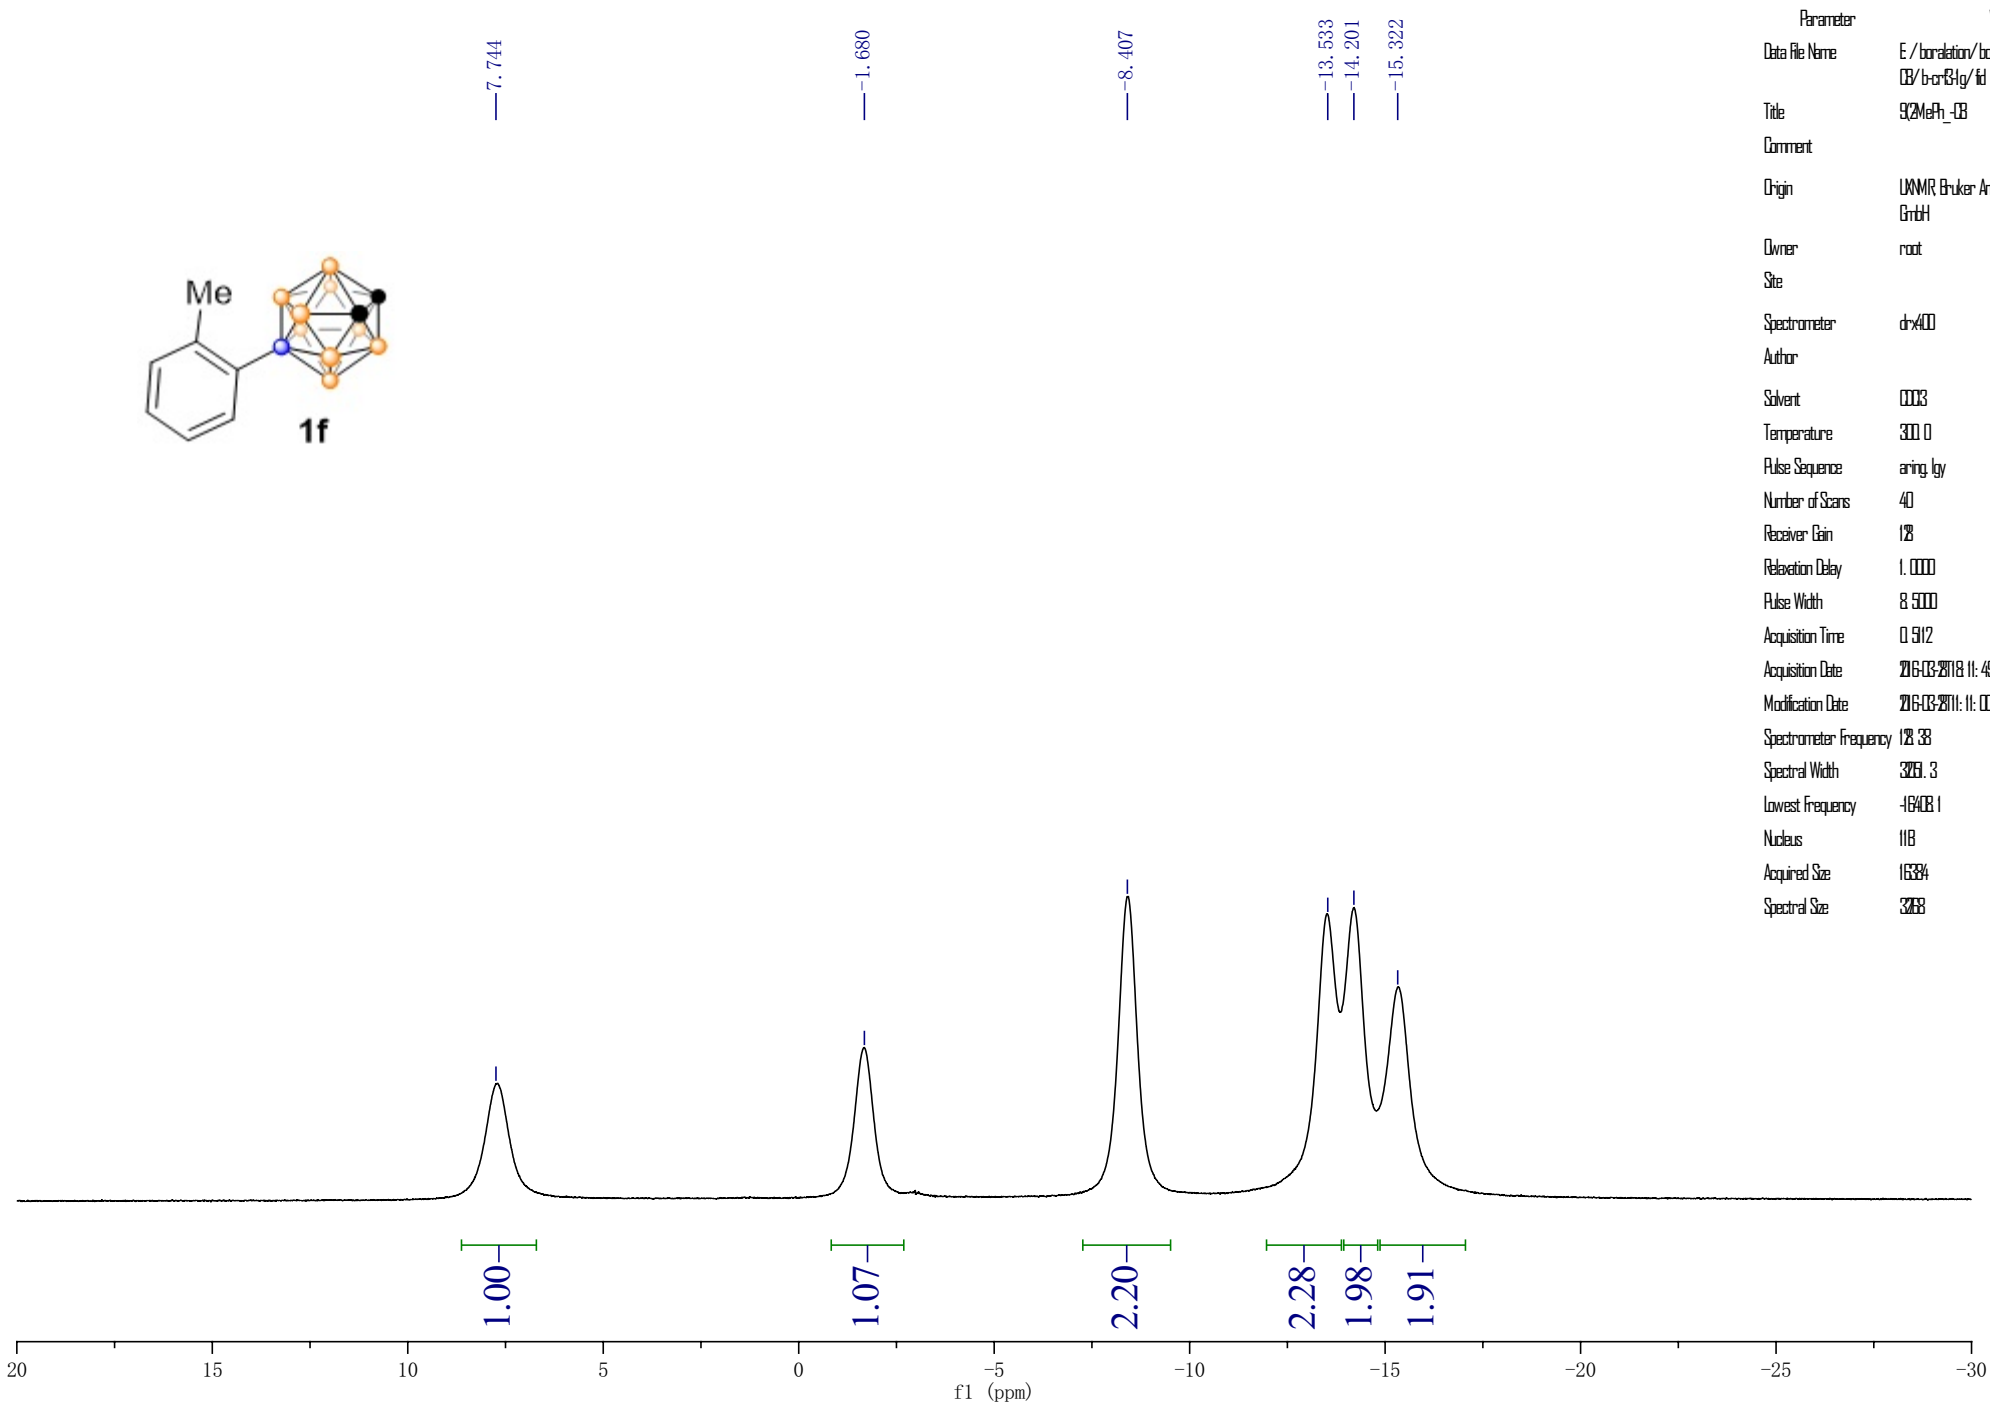

| Parameter              | Value                                       |
|------------------------|---------------------------------------------|
| Data File Name         | E:/boration/boration/3(2MePh)_CB/b-cr3lg/1d |
| Title                  | 3(2MePh)_CB                                 |
| Comment                |                                             |
| Origin                 | LUNMR Bruker Analytische Messtechnik GmbH   |
| Owner                  | root                                        |
| Site                   |                                             |
| Spectrometer           | crx400                                      |
| Author                 |                                             |
| Solvent                | CDCl3                                       |
| Temperature            | 300.0                                       |
| Pulse Sequence         | aning.ty                                    |
| Number of Scans        | 40                                          |
| Receiver Gain          | 128                                         |
| Relaxation Delay       | 1.0000                                      |
| Pulse Width            | 8.5000                                      |
| Acquisition Time       | 0.512                                       |
| Acquisition Date       | 2016-03-28T18:11:49                         |
| Modification Date      | 2016-03-28T11:11:00                         |
| Spectrometer Frequency | 128.38                                      |
| Spectral Width         | 3259.3                                      |
| Lowest Frequency       | -16408.1                                    |
| Nucleus                | 11B                                         |
| Acquired Size          | 16384                                       |
| Spectral Size          | 3268                                        |

Supplementary Figure 23.  $^{11}\text{B}\{^1\text{H}\}$  NMR Spectrum of **1f**.

crf-4-41-B-coupling-CDCl3

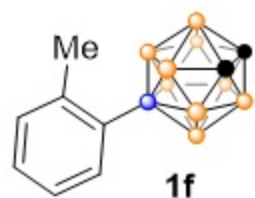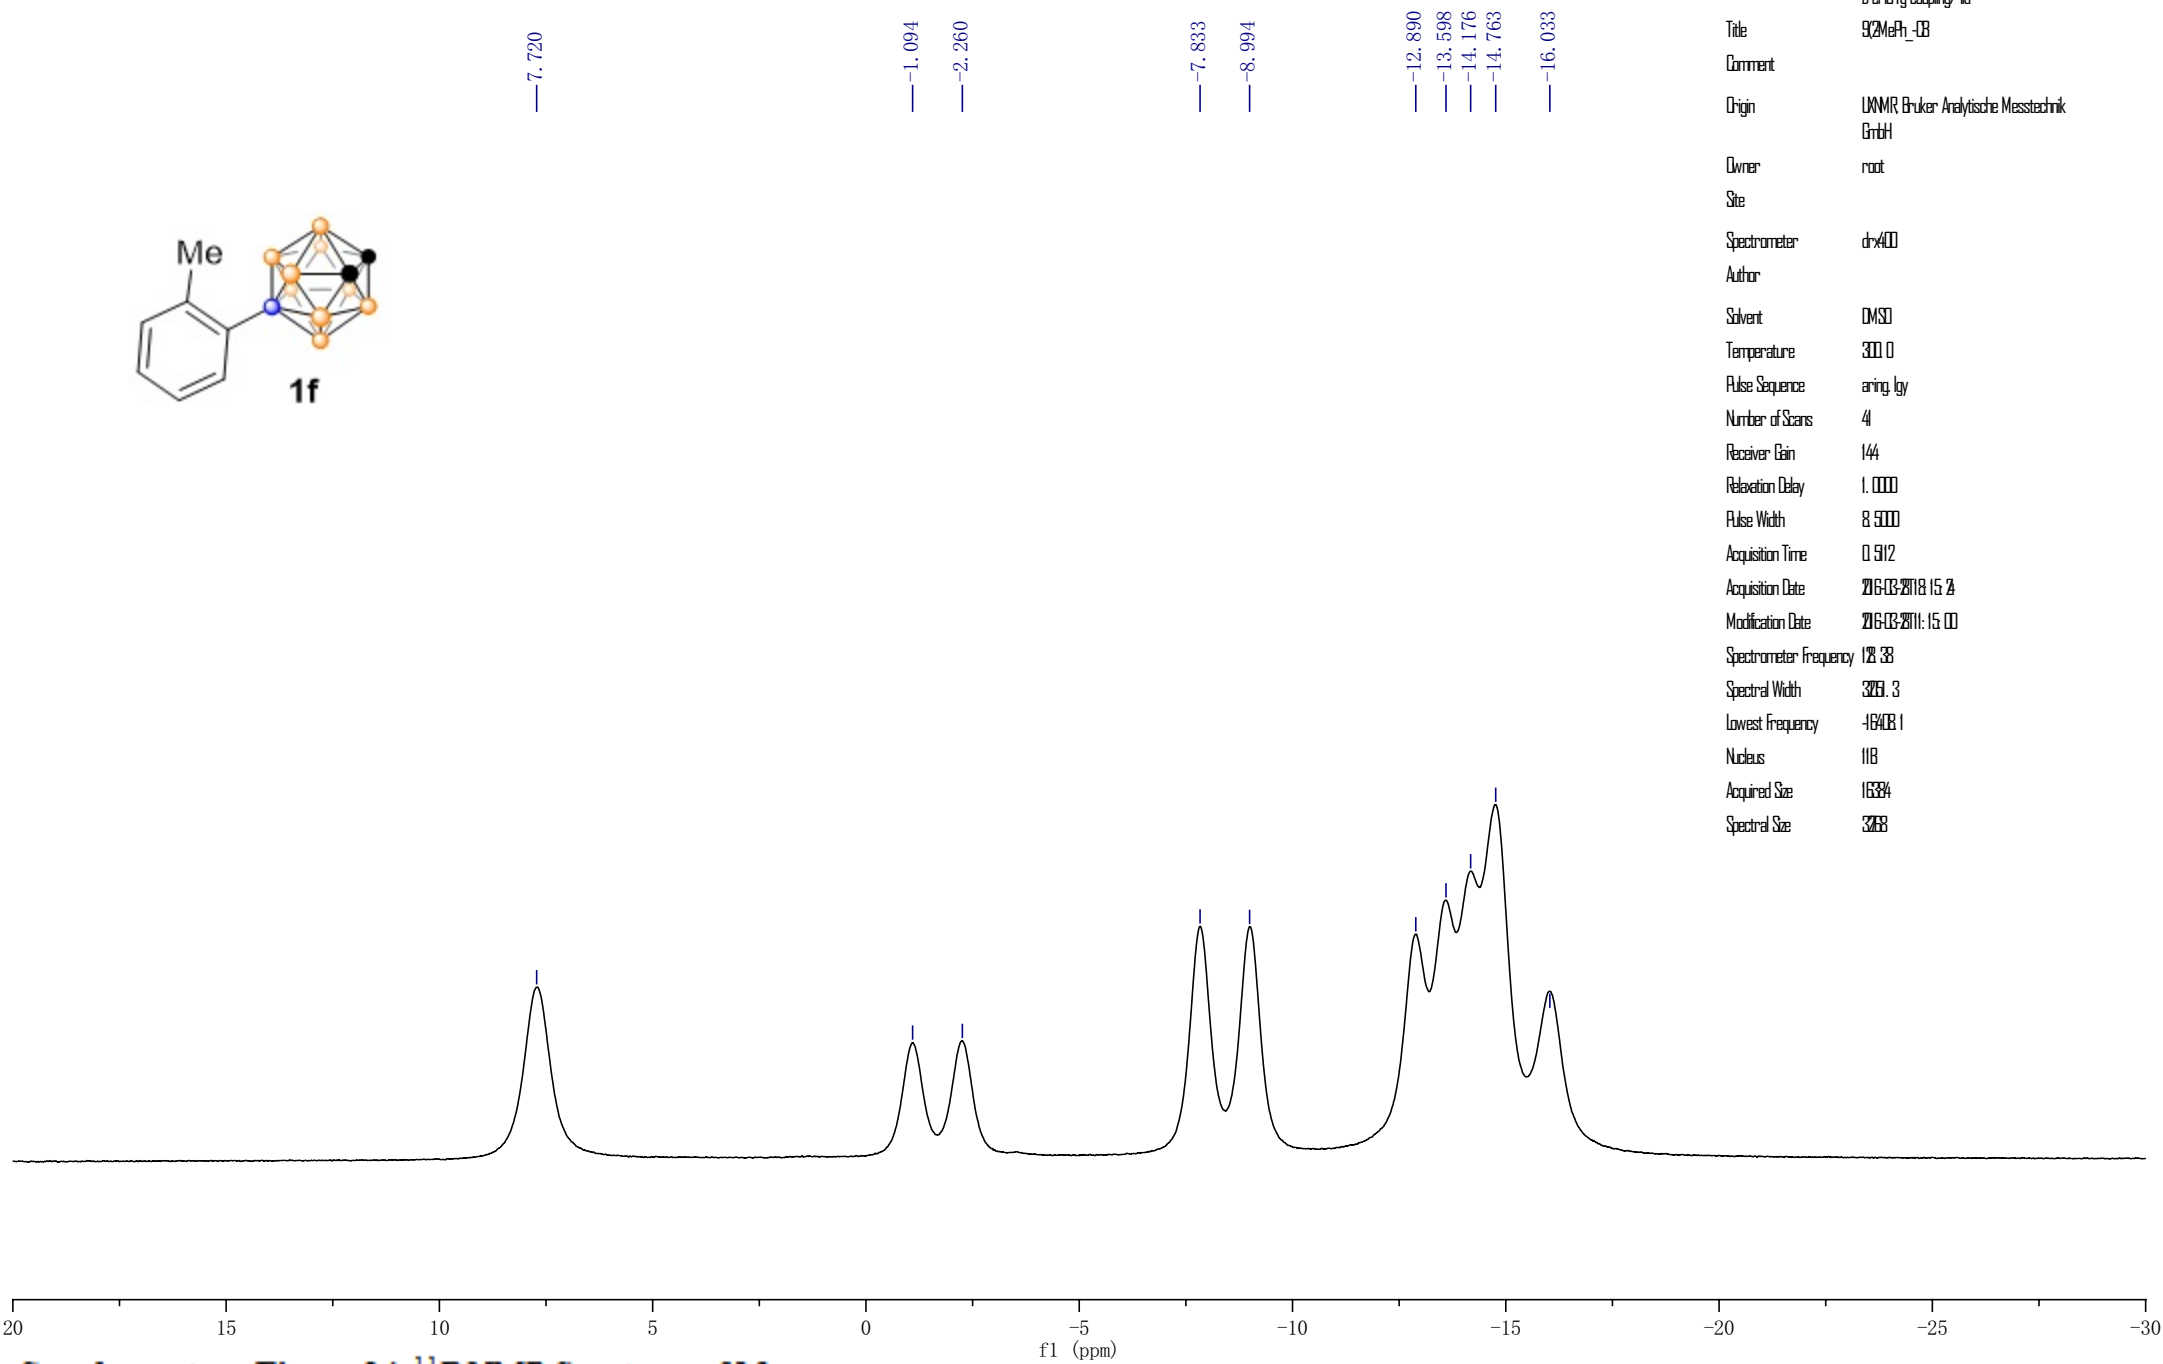

| Parameter              | Value                                                   |
|------------------------|---------------------------------------------------------|
| Data File Name         | E:/boralation/boralation/32MePh_4B/b-cr41g-coupling/fid |
| Title                  | 32MePh_4B                                               |
| Comment                |                                                         |
| Origin                 | UNMR Bruker Analytische Messtechnik GmbH                |
| Owner                  | root                                                    |
| Site                   |                                                         |
| Spectrometer           | dmx400                                                  |
| Author                 |                                                         |
| Solvent                | DMSO                                                    |
| Temperature            | 300.0                                                   |
| Pulse Sequence         | aring1g                                                 |
| Number of Scans        | 41                                                      |
| Receiver Gain          | 144                                                     |
| Relaxation Delay       | 1.0000                                                  |
| Pulse Width            | 8.5000                                                  |
| Acquisition Time       | 0.912                                                   |
| Acquisition Date       | 2016-03-29T18:15:28                                     |
| Modification Date      | 2016-03-29T11:15:00                                     |
| Spectrometer Frequency | 128.38                                                  |
| Spectral Width         | 3061.3                                                  |
| Lowest Frequency       | -16408.1                                                |
| Nucleus                | 11B                                                     |
| Acquired Size          | 16384                                                   |
| Spectral Size          | 3063                                                    |

Supplementary Figure 24. <sup>11</sup>B NMR Spectrum of 1f.

crf-3-94-H-CDCl3

7.355  
7.330  
7.308  
7.260  
6.949  
6.920  
6.889

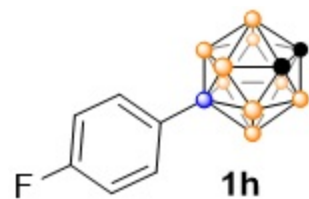

3.624  
3.522

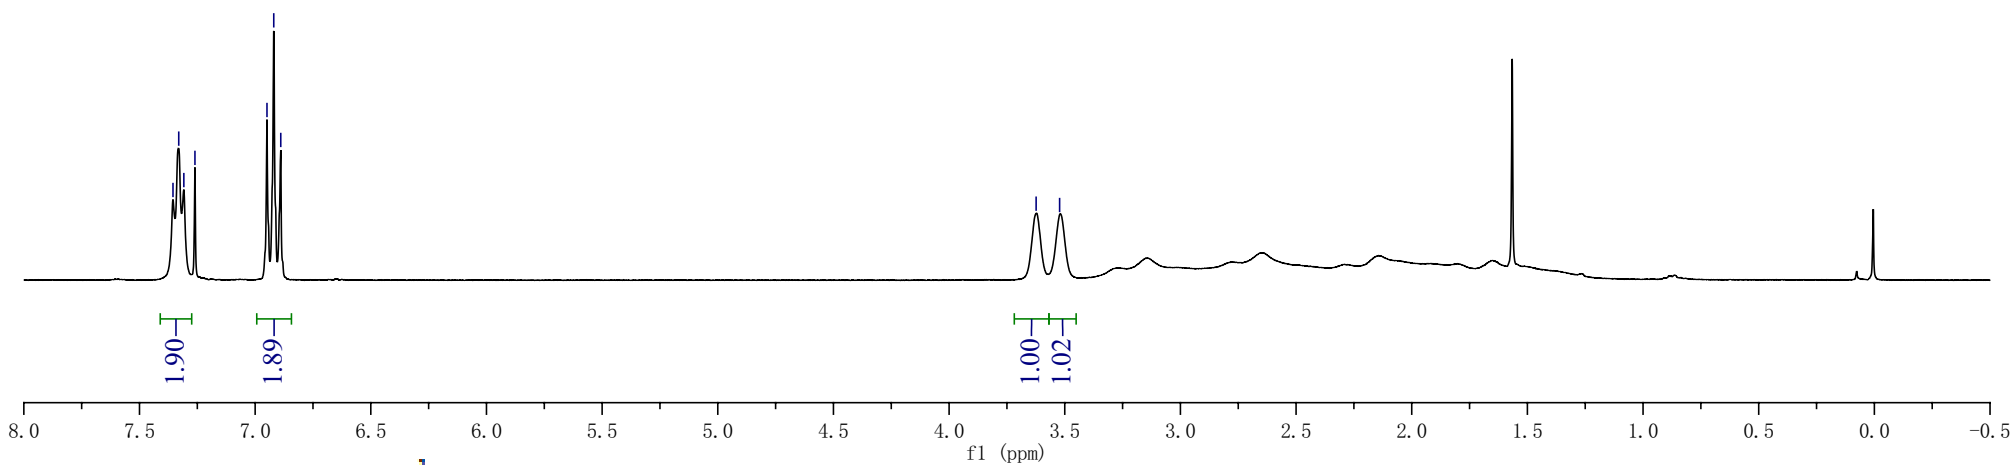

| Parameter              | Value               |
|------------------------|---------------------|
| Title                  | crf3-1h-HClO3       |
| Comment                | STANDARD 1H OBSERVE |
| Origin                 | Varien              |
| Owner                  |                     |
| Site                   |                     |
| Spectrometer           | mercury             |
| Author                 | omc                 |
| Solvent                | CDCl3               |
| Temperature            | 28.0                |
| Pulse Sequence         | s2pul               |
| Number of Scans        | 8                   |
| Receiver Gain          | 28                  |
| Relaxation Delay       | 1.0000              |
| Pulse Width            | 0.0000              |
| Acquisition Date       | 2016-04-08 12:55:05 |
| Spectrometer Frequency | 300.03              |
| Spectral Width         | 5494.5              |
| Lowest Frequency       | -708.9              |
| Nucleus                | 1H                  |
| Acquired Size          | 10000               |
| Spectral Size          | 3200                |

Supplementary Figure 25. <sup>1</sup>H NMR Spectrum of 1h.

crf-3-94-C-CDCl3

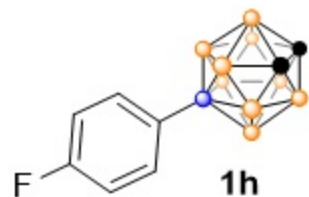

164.544  
161.292

134.117  
134.019

114.503  
114.241

77.583  
77.160  
76.736

53.323  
48.976

| Parameter              | Value              |
|------------------------|--------------------|
| Title                  | crf34h-0408        |
| Comment                | 13C OBSERVE        |
| Origin                 | Varian             |
| Owner                  |                    |
| Site                   |                    |
| Spectrometer           | mercury            |
| Author                 | omc                |
| Solvent                | CDCl3              |
| Temperature            | 28.0               |
| Pulse Sequence         | sgzb               |
| Number of Scans        | 1080               |
| Receiver Gain          | 32                 |
| Relaxation Delay       | 1.0000             |
| Pulse Width            | 0.0000             |
| Acquisition Date       | 2016-04-08T2:58:44 |
| Spectrometer Frequency | 75.45              |
| Spectral Width         | 1901.4             |
| Lowest Frequency       | -1743.8            |
| Nucleus                | 13C                |
| Acquired Size          | 2897               |
| Spectral Size          | 65536              |

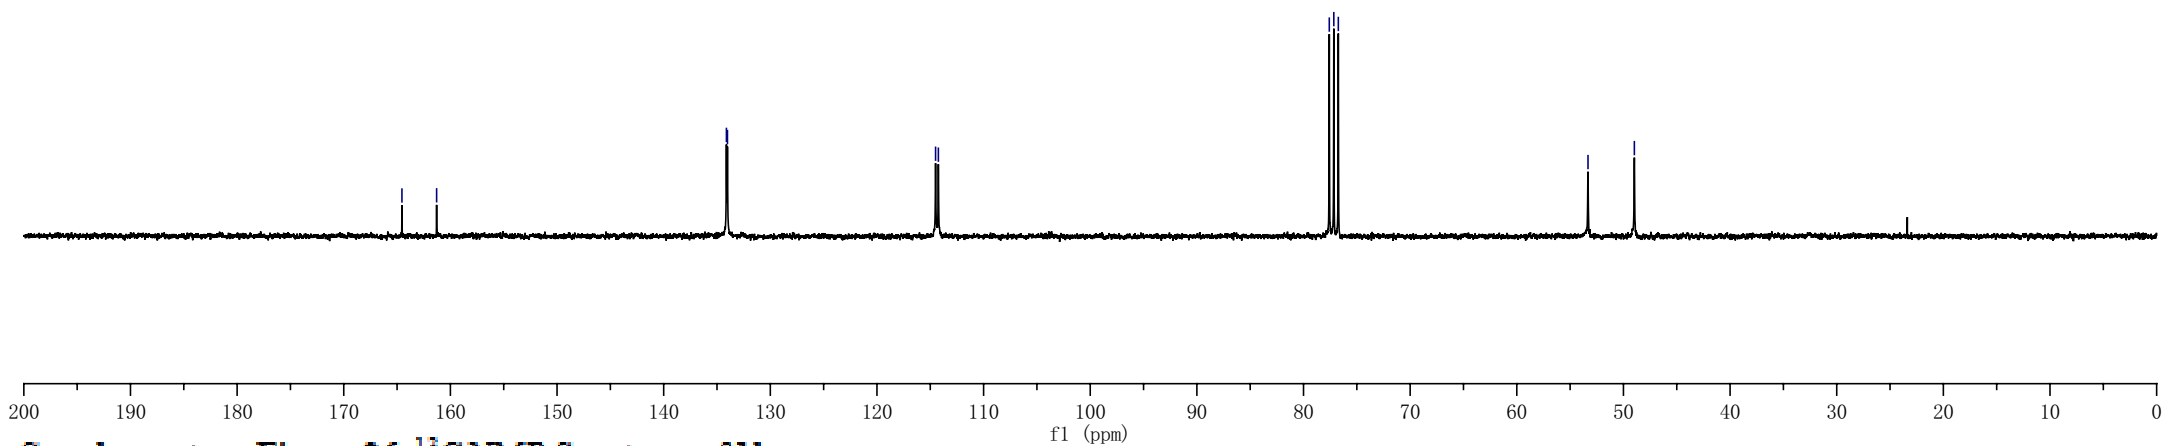

Supplementary Figure 26. <sup>13</sup>C NMR Spectrum of 1h.

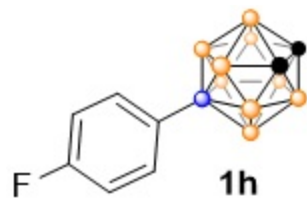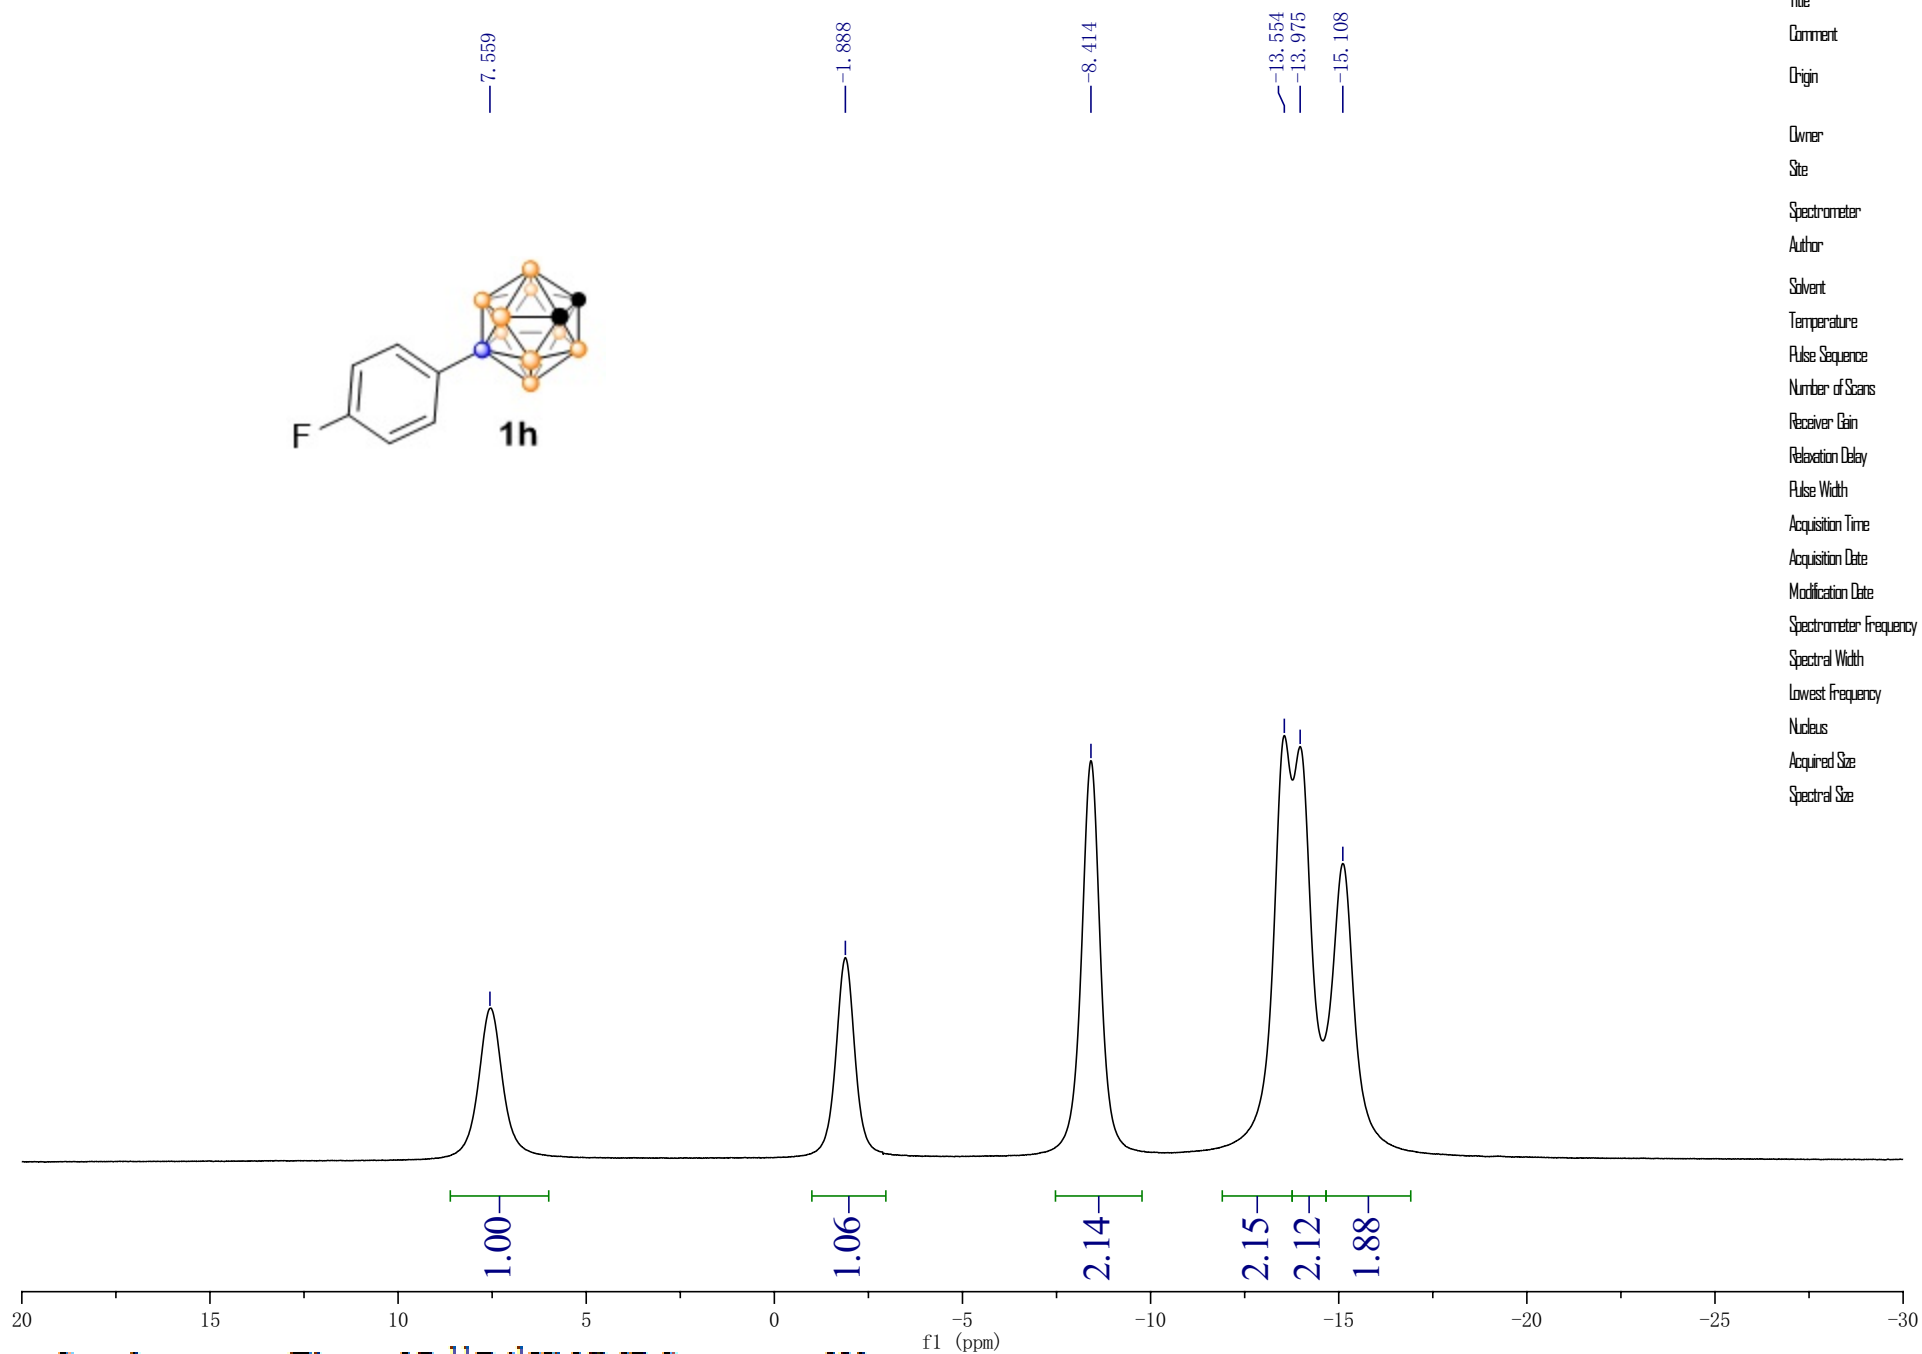

| Parameter              | Value                                        |
|------------------------|----------------------------------------------|
| Data File Name         | G:/Users/Administrator/Desktop/b-cr-f34h/fid |
| Title                  | Desktop                                      |
| Comment                |                                              |
| Origin                 | UNMR Bruker Analytische Messtechnik GmbH     |
| Owner                  | root                                         |
| Site                   |                                              |
| Spectrometer           | dmx400                                       |
| Author                 |                                              |
| Solvent                | DMSO                                         |
| Temperature            | 300.0                                        |
| Pulse Sequence         | aning-1g                                     |
| Number of Scans        | 256                                          |
| Receiver Gain          | 32                                           |
| Relaxation Delay       | 1.0000                                       |
| Pulse Width            | 8.5000                                       |
| Acquisition Time       | 0.512                                        |
| Acquisition Date       | 2016-04-07 15:56:02                          |
| Modification Date      | 2016-04-07 09:02:00                          |
| Spectrometer Frequency | 128.38                                       |
| Spectral Width         | 3261.3                                       |
| Lowest Frequency       | -16386.4                                     |
| Nucleus                | 11B                                          |
| Acquired Size          | 16384                                        |
| Spectral Size          | 3288                                         |

Supplementary Figure 27.  $^{11}\text{B}\{^1\text{H}\}$  NMR Spectrum of **1h**.



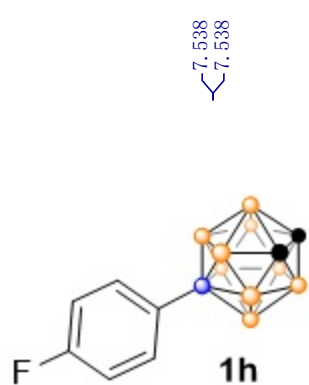

7.538  
7.538

-1.300  
-2.461

-7.828  
-8.992

-12.921  
-13.327  
-14.371  
-15.801

| Parameter              | Value                                                     |
|------------------------|-----------------------------------------------------------|
| Data file Name         | G:/Users/Administrator/Desktop/b-cr-f31h-coupling (1)/fid |
| Title                  | Desktop                                                   |
| Comment                |                                                           |
| Origin                 | UNMR Bruker Analytische Messtechnik GmbH                  |
| Owner                  | root                                                      |
| Site                   |                                                           |
| Spectrometer           | crx400                                                    |
| Author                 |                                                           |
| Solvent                | DMSO                                                      |
| Temperature            | 300.0                                                     |
| Pulse Sequence         | aring_1gy                                                 |
| Number of Scans        | 26                                                        |
| Receiver Gain          | 32                                                        |
| Relaxation Delay       | 1.0000                                                    |
| Pulse Width            | 8.5000                                                    |
| Acquisition Time       | 0.512                                                     |
| Acquisition Date       | 2016-04-07 08:10                                          |
| Modification Date      | 2016-04-07 09:14:00                                       |
| Spectrometer Frequency | 128.38                                                    |
| Spectral Width         | 3261.3                                                    |
| Lowest Frequency       | -16334.6                                                  |
| Nucleus                | 11B                                                       |
| Acquired Size          | 16334                                                     |
| Spectral Size          | 3268                                                      |

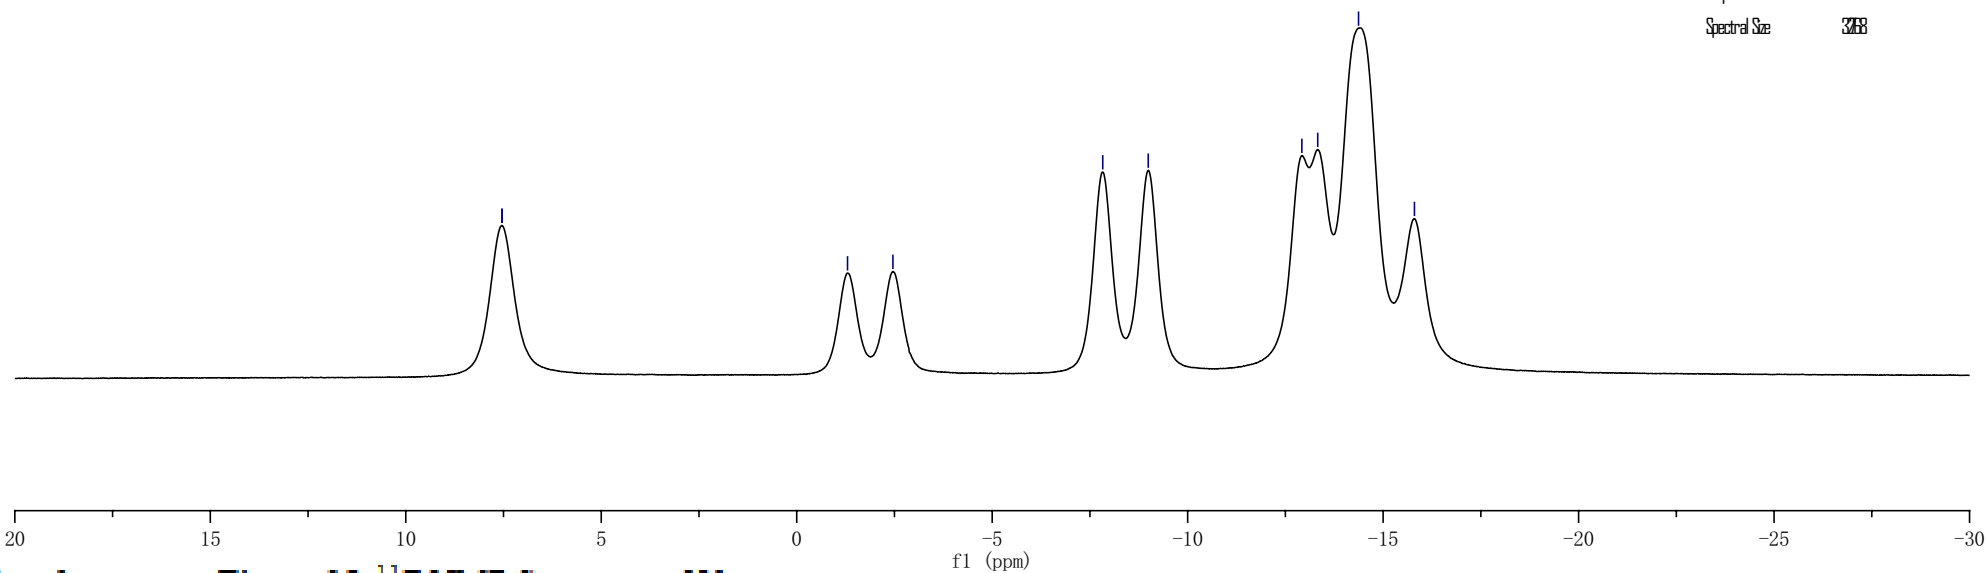

Supplementary Figure 28. <sup>11</sup>B NMR Spectrum of 1h.

crf-3-Bpin-CB-H-CDC13

7.2

3.5

1.255

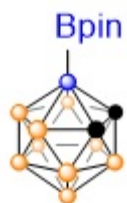

2a

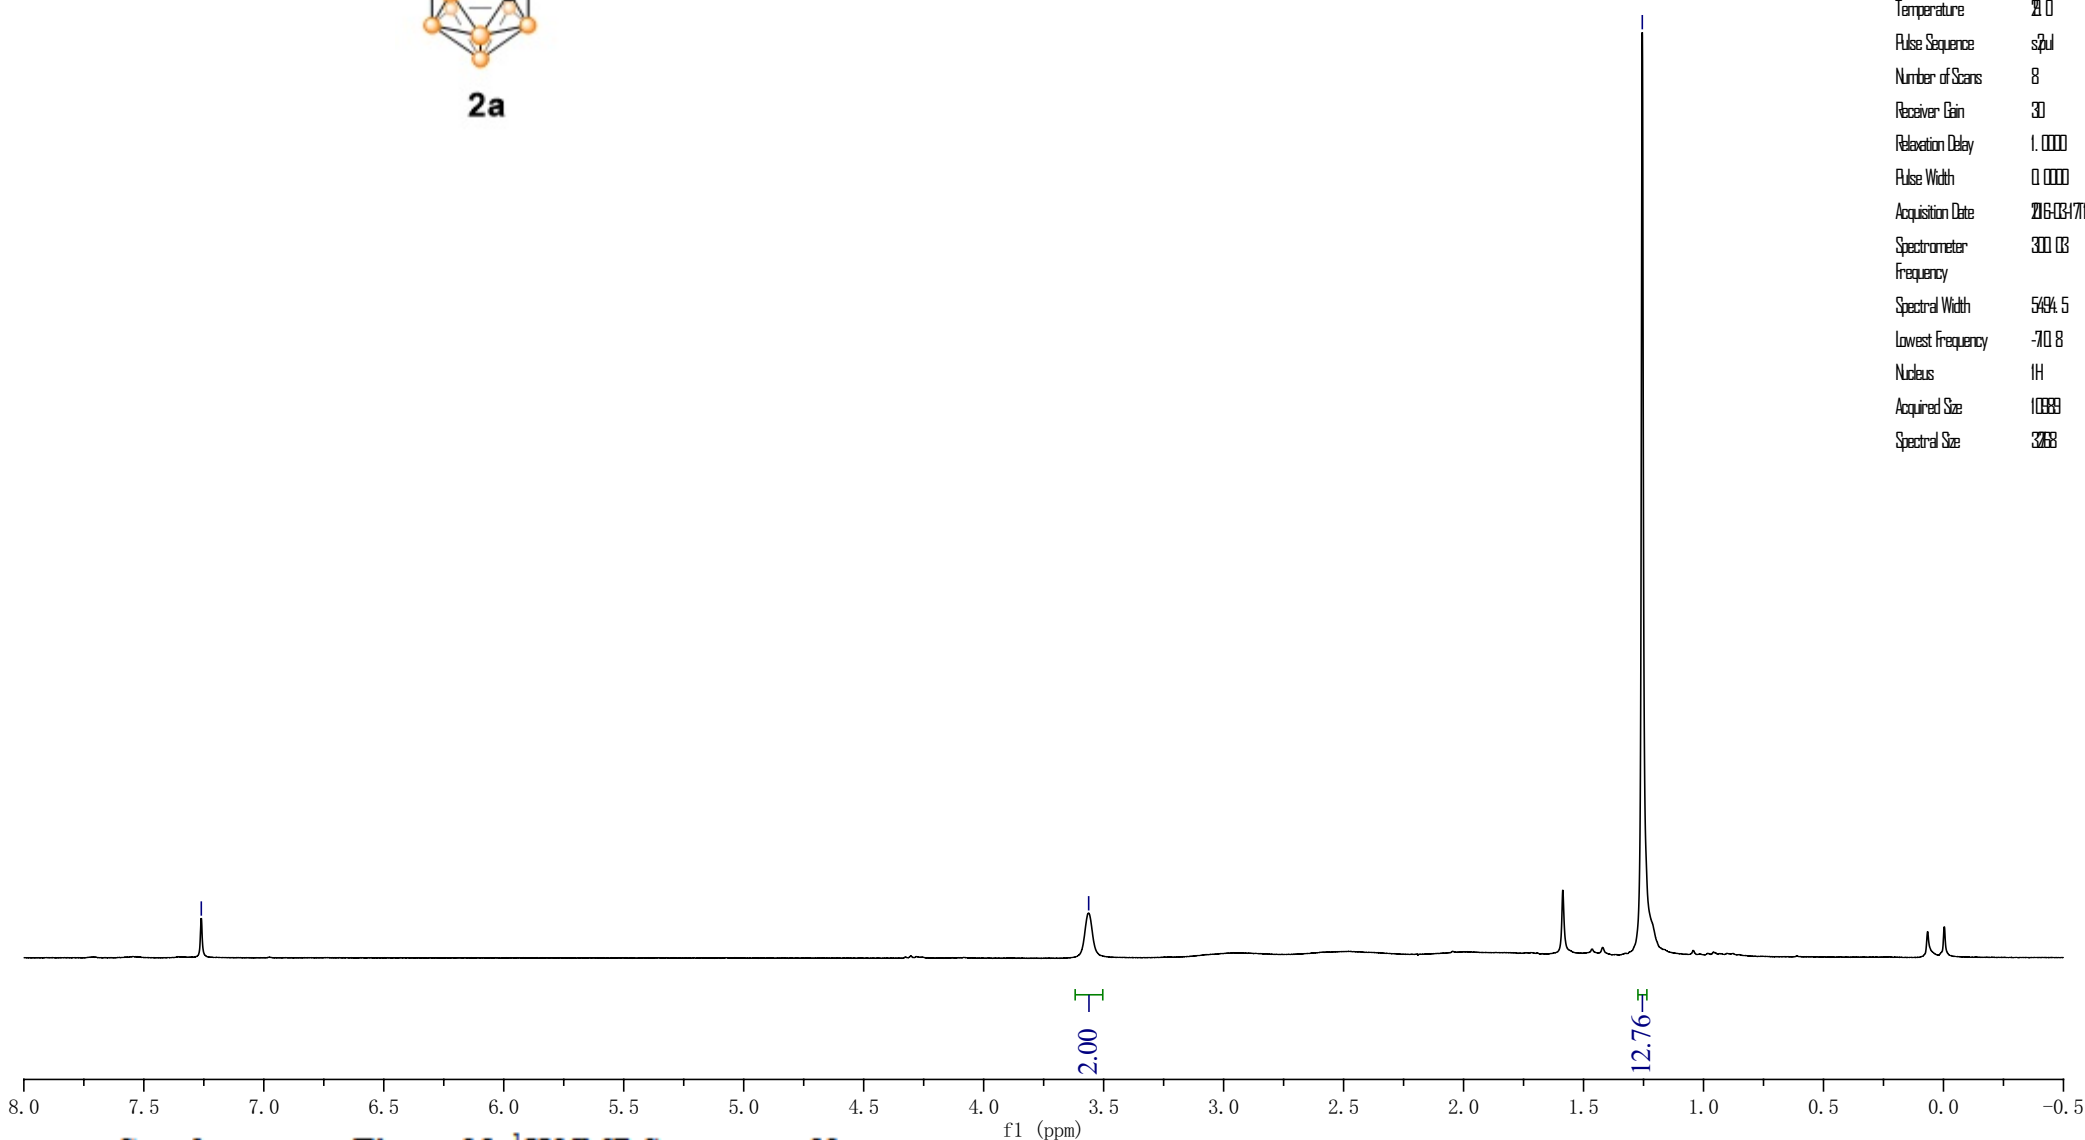

| Parameter              | Value               |
|------------------------|---------------------|
| Title                  | crf3-Bpin-CB-H      |
| Comment                | STANDARD 1H OBSERVE |
| Origin                 | Varien              |
| Owner                  |                     |
| Site                   |                     |
| Spectrometer           | mercury             |
| Author                 | omc                 |
| Solvent                | CDCl3               |
| Temperature            | 20.0                |
| Pulse Sequence         | sgpul               |
| Number of Scans        | 8                   |
| Receiver Gain          | 30                  |
| Relaxation Delay       | 1.0000              |
| Pulse Width            | 0.0000              |
| Acquisition Date       | 2016-03-17 19:51:47 |
| Spectrometer Frequency | 300.03              |
| Spectral Width         | 5494.5              |
| Lowest Frequency       | -70.8               |
| Nucleus                | 1H                  |
| Acquired Size          | 10368               |
| Spectral Size          | 3068                |

Supplementary Figure 29. <sup>1</sup>H NMR Spectrum of 2a.

S50

crf-3-Bpin-CB-C-CDCl3

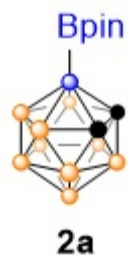

84.400  
77.583  
77.160  
76.736  
56.298  
24.995

| Parameter              | Value               |
|------------------------|---------------------|
| Title                  | crf-3-Bpin-CB-C     |
| Comment                | 13C OBSERVE         |
| Origin                 | Varian              |
| Owner                  |                     |
| Site                   |                     |
| Spectrometer           | mercury             |
| Author                 | omc                 |
| Solvent                | CDCl3               |
| Temperature            | 28.0                |
| Pulse Sequence         | zgpg30              |
| Number of Scans        | 22                  |
| Receiver Gain          | 34                  |
| Relaxation Delay       | 1.0000              |
| Pulse Width            | 0.0000              |
| Acquisition Date       | 2016-03-17 19:58:15 |
| Spectrometer Frequency | 76.45               |
| Spectral Width         | 1901.4              |
| Lowest Frequency       | -1755.0             |
| Nucleus                | 13C                 |
| Acquired Size          | 2937                |
| Spectral Size          | 65536               |

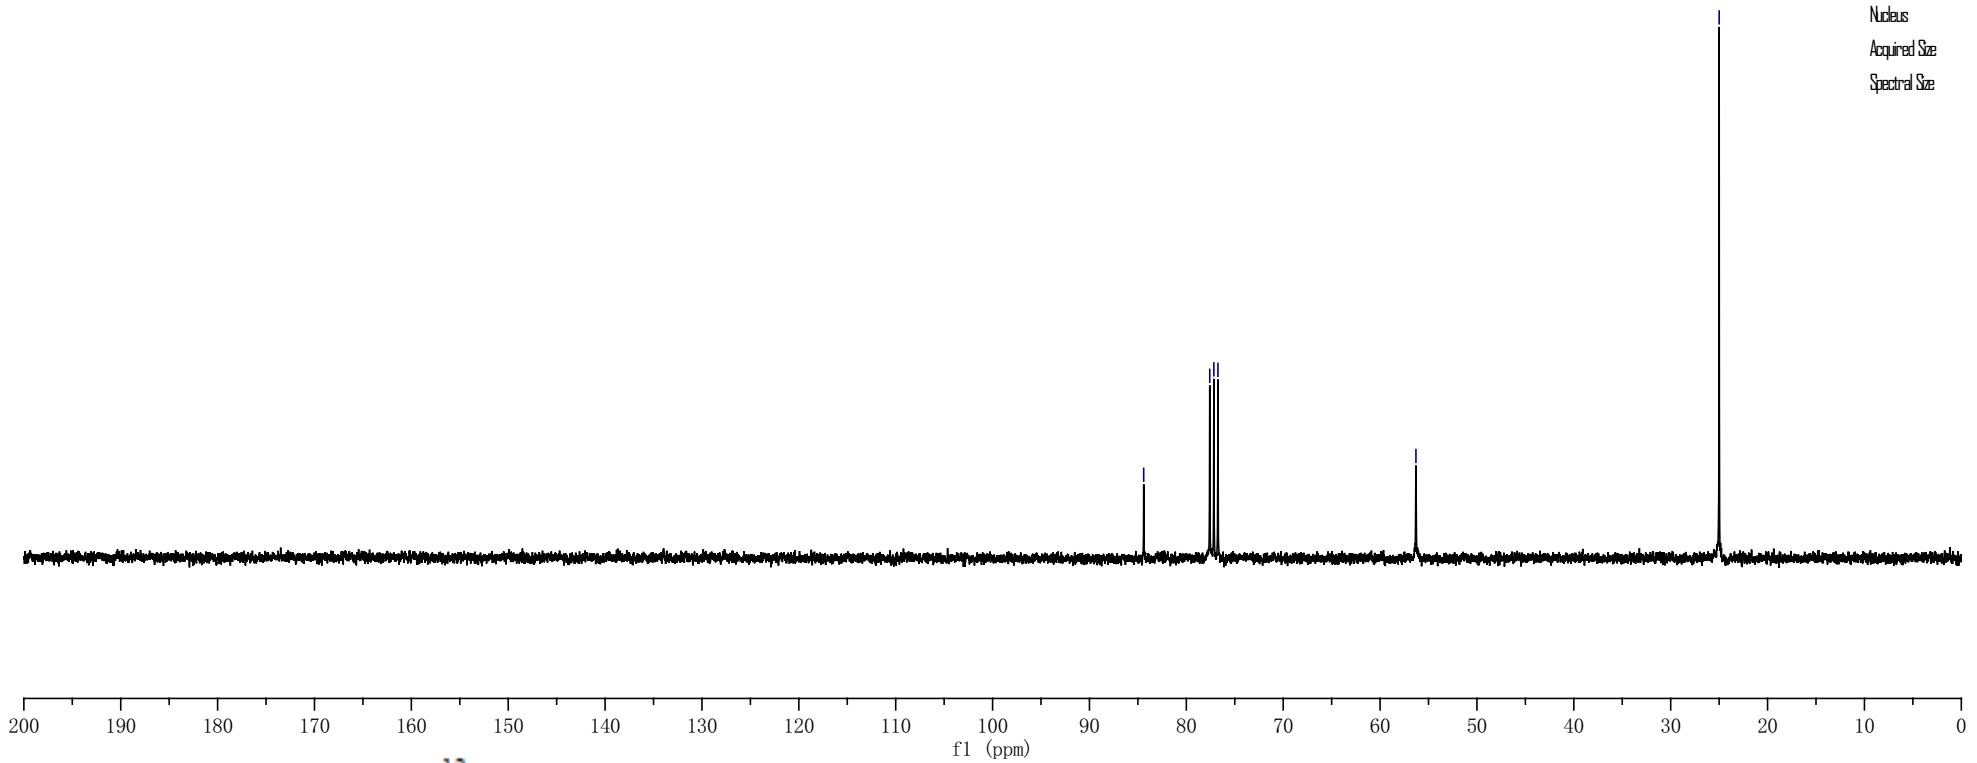

Supplementary Figure 30. <sup>13</sup>C NMR Spectrum of 2a.

crf-3-Bpin-CB-B-decoupling-CDC13

| Parameter              | Value                                                  |
|------------------------|--------------------------------------------------------|
| Data File Name         | E:/boralation/boralation/3-CB-Bpin/b-cr-f3-Bpin-cb/fid |
| Title                  | 3-CB-Bpin                                              |
| Comment                |                                                        |
| Origin                 | UNMR Bruker Analytische Messtechnik GmbH               |
| Owner                  | root                                                   |
| Site                   |                                                        |
| Spectrometer           | dx400                                                  |
| Author                 |                                                        |
| Solvent                | DMSO                                                   |
| Temperature            | 300.0                                                  |
| Pulse Sequence         | aring-1gy                                              |
| Number of Scans        | 148                                                    |
| Receiver Gain          | 26                                                     |
| Relaxation Delay       | 1.0000                                                 |
| Pulse Width            | 8.5000                                                 |
| Acquisition Time       | 0.512                                                  |
| Acquisition Date       | 2016-03-18T16:02:19                                    |
| Modification Date      | 2016-03-18T08:02:00                                    |
| Spectrometer Frequency | 128.38                                                 |
| Spectral Width         | 3269.3                                                 |
| Lowest Frequency       | -1639.5                                                |
| Nucleus                | <sup>11</sup> B                                        |
| Acquired Size          | 16384                                                  |
| Spectral Size          | 3288                                                   |

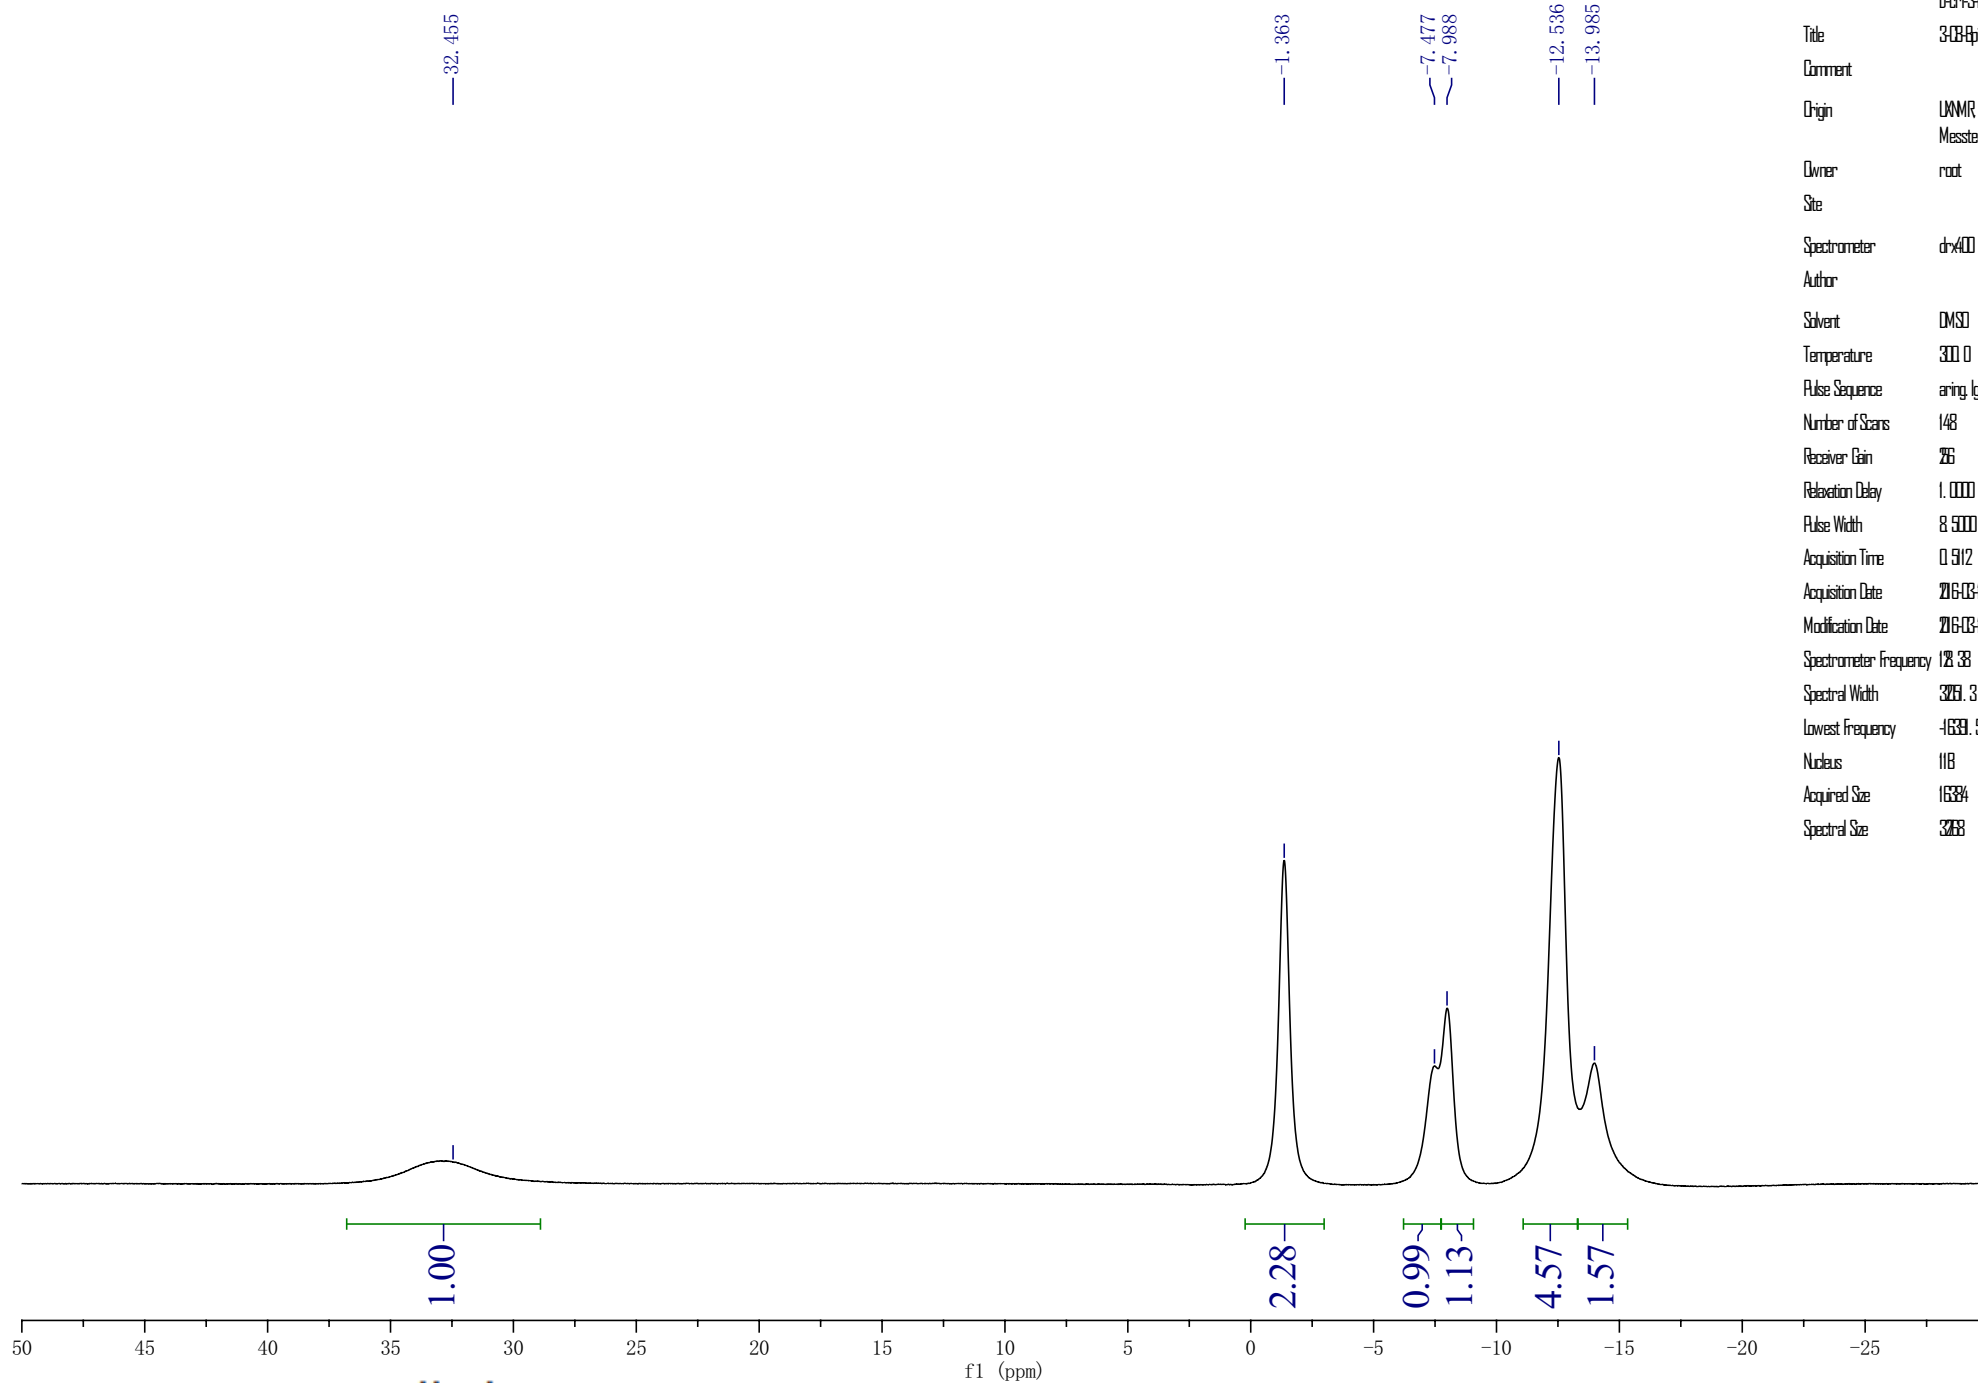

Supplementary Figure 31. <sup>11</sup>B{<sup>1</sup>H} NMR Spectrum of 2a.

crf-3-Bpin-CB-B-coupling-CDC13

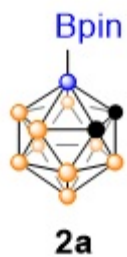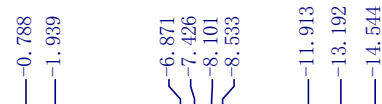

| Parameter              | Value                                                        |
|------------------------|--------------------------------------------------------------|
| Data File Name         | E:/boralation/boralation/3-CB-Bpin/b-cr3-bpin-cb-coupling/1d |
| Title                  | 3-CB-Bpin                                                    |
| Comment                |                                                              |
| Origin                 | LNMNR Bruker Analytische Messtechnik GmbH                    |
| Owner                  | root                                                         |
| Site                   |                                                              |
| Spectrometer           | crx400                                                       |
| Author                 |                                                              |
| Solvent                | DMSO                                                         |
| Temperature            | 300.0                                                        |
| Pulse Sequence         | aring.1gy                                                    |
| Number of Scans        | 128                                                          |
| Receiver Gain          | 286                                                          |
| Relaxation Delay       | 1.0000                                                       |
| Pulse Width            | 8.5000                                                       |
| Acquisition Time       | 0.512                                                        |
| Acquisition Date       | 2016-03-18 16:06:27                                          |
| Modification Date      | 2016-03-18 16:06:00                                          |
| Spectrometer Frequency | 128.38                                                       |
| Spectral Width         | 3269.3                                                       |
| Lowest Frequency       | -1639.5                                                      |
| Nucleus                | 11B                                                          |
| Acquired Size          | 16384                                                        |
| Spectral Size          | 3288                                                         |

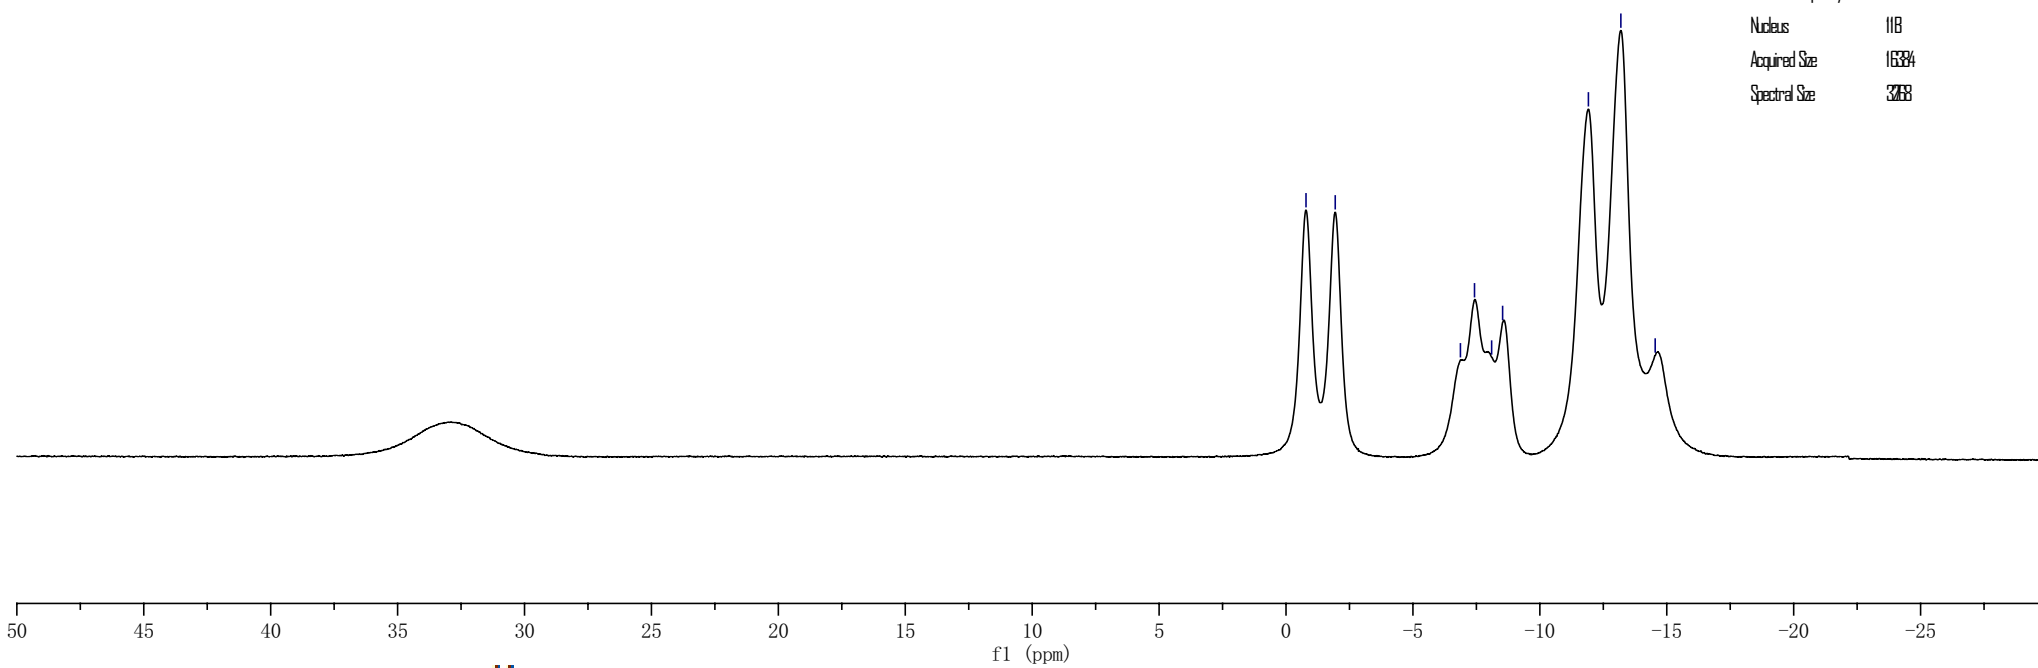

Supplementary Figure 32. <sup>11</sup>B NMR Spectrum of 2a.

crf-4-12-H-CDCl<sub>3</sub>

7.577  
7.555  
7.322  
7.303  
7.260

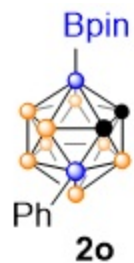

3.795  
3.718

1.260

| Parameter              | Value               |
|------------------------|---------------------|
| Title                  | crf-4-12H           |
| Comment                | STANDARD 1H OBSERVE |
| Origin                 | Varian              |
| Owner                  |                     |
| Site                   |                     |
| Spectrometer           | mercury             |
| Author                 | omc                 |
| Solvent                | CDCl <sub>3</sub>   |
| Temperature            | 28.0                |
| Pulse Sequence         | sgpd                |
| Number of Scans        | 12                  |
| Receiver Gain          | 30                  |
| Relaxation Delay       | 1.000               |
| Pulse Width            | 0.000               |
| Acquisition Date       | 2015-03-27 15:40:36 |
| Spectrometer Frequency | 300.03              |
| Spectral Width         | 5494.5              |
| Lowest Frequency       | -70.5               |
| Nucleus                | 1H                  |
| Acquired Size          | 10376               |
| Spectral Size          | 3268                |

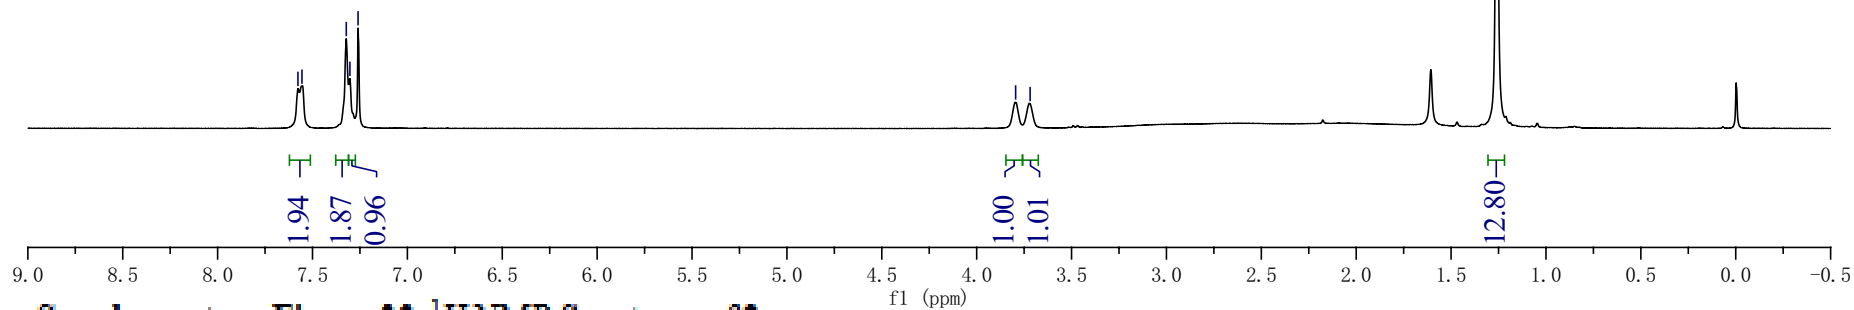

Supplementary Figure 33. <sup>1</sup>H NMR Spectrum of 2o.

crf-4-12-C-CDCl<sub>3</sub>

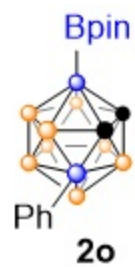

133.120  
128.327  
127.639

84.159  
77.303  
76.880  
76.456

56.698  
56.305

24.734  
24.699

| Parameter              | Value               |
|------------------------|---------------------|
| Title                  | crf-4-12C           |
| Comment                | 13C OBSERVE         |
| Origin                 | Varian              |
| Owner                  |                     |
| Site                   |                     |
| Spectrometer           | mercury             |
| Author                 | omc                 |
| Solvent                | CDCl <sub>3</sub>   |
| Temperature            | 21.0                |
| Pulse Sequence         | zgpg30              |
| Number of Scans        | 52                  |
| Receiver Gain          | 34                  |
| Relaxation Delay       | 1.0000              |
| Pulse Width            | 0.0000              |
| Acquisition Date       | 2015-03-27 16:06:26 |
| Spectrometer Frequency | 75.45               |
| Spectral Width         | 1901.4              |
| Lowest Frequency       | -1766.4             |
| Nucleus                | 13C                 |
| Acquired Size          | 2837                |
| Spectral Size          | 65536               |

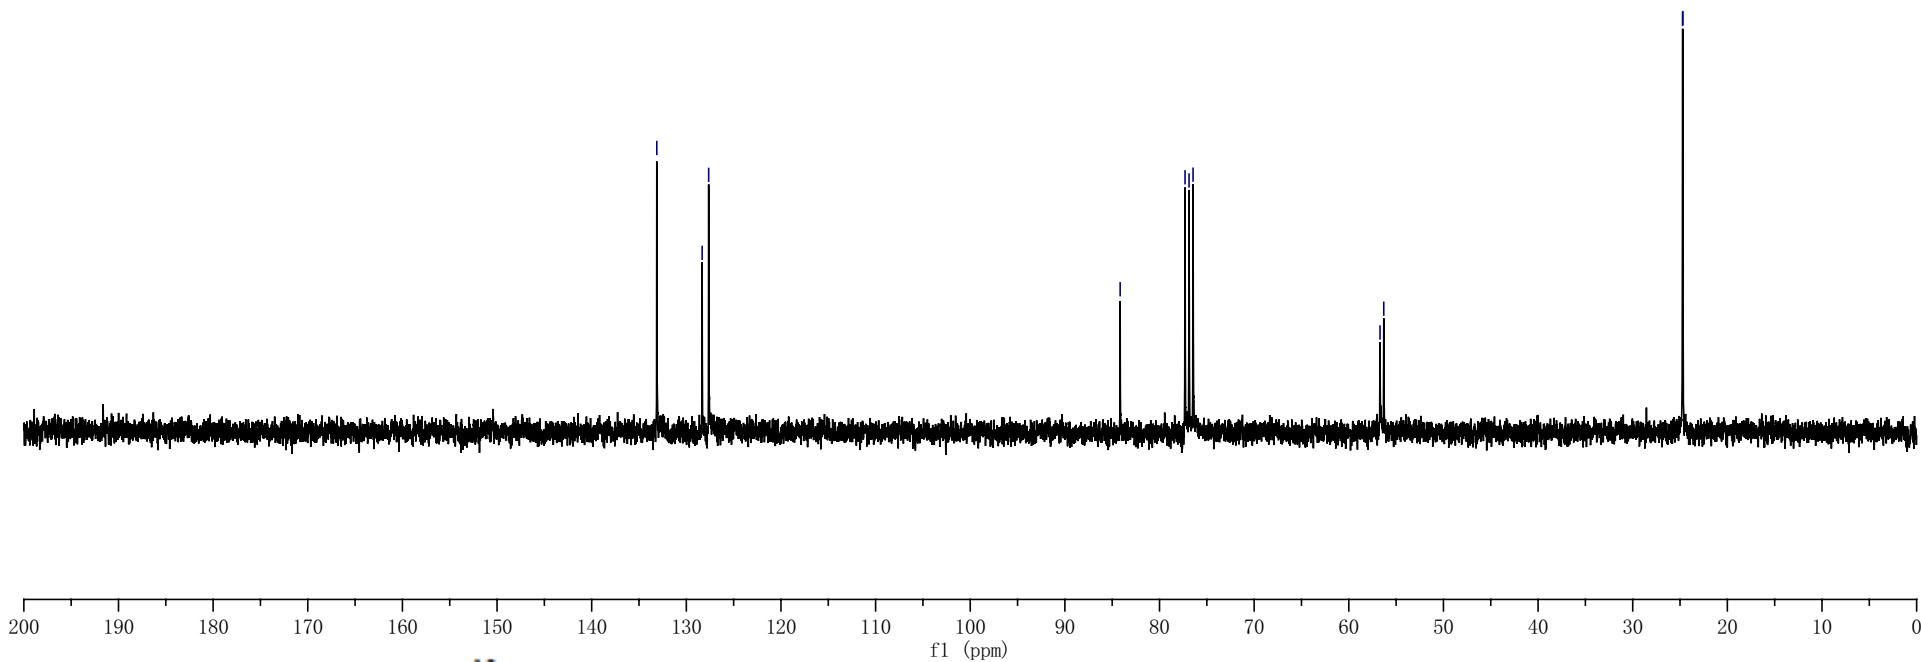

Supplementary Figure 34. <sup>13</sup>C NMR Spectrum of 2o.

crf-4-12-B-decoupling-CDCl<sub>3</sub>

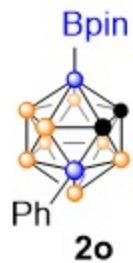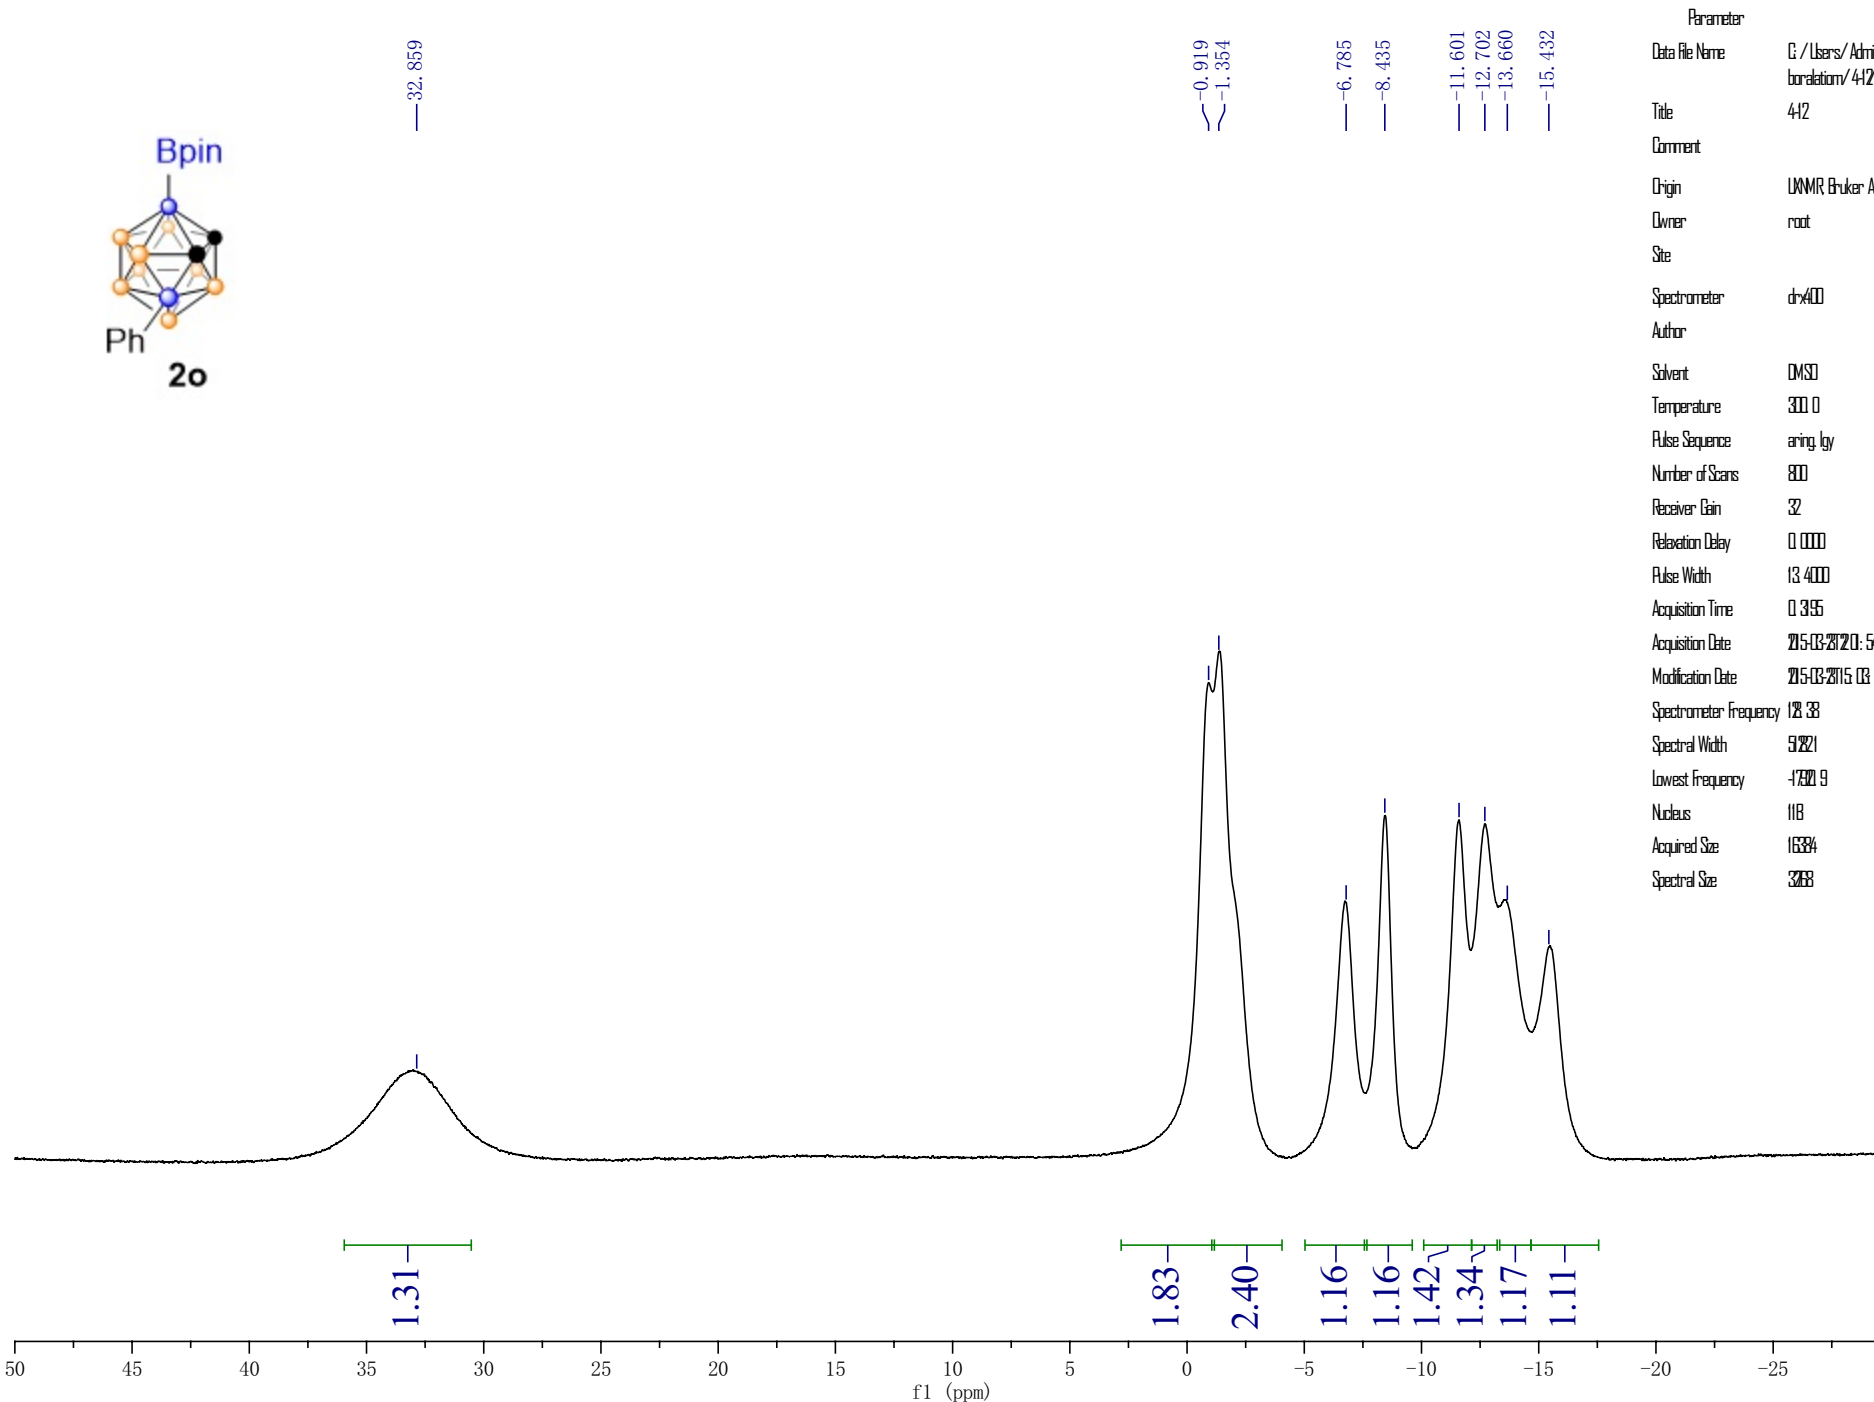

| Parameter              | Value                                                                |
|------------------------|----------------------------------------------------------------------|
| Data File Name         | C:/Users/Administrator/Desktop/work/送样NMR/borulation/412/crf-412.fid |
| Title                  | 412                                                                  |
| Comment                |                                                                      |
| Origin                 | UNMR Bruker Analytische Messtechnik GmbH                             |
| Owner                  | root                                                                 |
| Site                   |                                                                      |
| Spectrometer           | dx400                                                                |
| Author                 |                                                                      |
| Solvent                | DMSO                                                                 |
| Temperature            | 300.0                                                                |
| Pulse Sequence         | aring1gy                                                             |
| Number of Scans        | 800                                                                  |
| Receiver Gain          | 32                                                                   |
| Relaxation Delay       | 0.0000                                                               |
| Pulse Width            | 13.4000                                                              |
| Acquisition Time       | 0.3155                                                               |
| Acquisition Date       | 2015-03-20 12:01:54                                                  |
| Modification Date      | 2015-03-20 15:03:00                                                  |
| Spectrometer Frequency | 128.38                                                               |
| Spectral Width         | 59.821                                                               |
| Lowest Frequency       | -17.8009                                                             |
| Nucleus                | <sup>11</sup> B                                                      |
| Acquired Size          | 16384                                                                |
| Spectral Size          | 3288                                                                 |

Supplementary Figure 35. <sup>11</sup>B{<sup>1</sup>H} NMR Spectrum of 2o.



crf-4-12-B-coupling-CDCl<sub>3</sub>

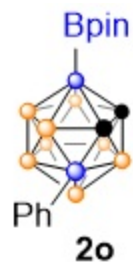

33.209

-0.265  
-0.883  
-1.976  
-6.153  
-7.771  
-8.978  
-10.953  
-12.190  
-13.234  
-14.404  
-16.133

| Parameter              | Value                                                                          |
|------------------------|--------------------------------------------------------------------------------|
| Data File Name         | C:/Users/Administrator/Desktop/work/送样 NMR/borolation/412-b-cr-f412coupling/ld |
| Title                  | 412                                                                            |
| Comment                |                                                                                |
| Origin                 | UWMR Bruker Analytische Messtechnik GmbH                                       |
| Owner                  | root                                                                           |
| Site                   |                                                                                |
| Spectrometer           | dr400                                                                          |
| Author                 |                                                                                |
| Solvent                | DMSO                                                                           |
| Temperature            | 300.0                                                                          |
| Pulse Sequence         | aring1gy                                                                       |
| Number of Scans        | 800                                                                            |
| Receiver Gain          | 32                                                                             |
| Relaxation Delay       | 0.0000                                                                         |
| Pulse Width            | 13.4000                                                                        |
| Acquisition Time       | 0.3155                                                                         |
| Acquisition Date       | 2015-03-20 12:08:22                                                            |
| Modification Date      | 2015-03-20 15:08:00                                                            |
| Spectrometer Frequency | 128.38                                                                         |
| Spectral Width         | 51281                                                                          |
| Lowest Frequency       | -44452.3                                                                       |
| Nucleus                | 11B                                                                            |
| Acquired Size          | 16334                                                                          |
| Spectral Size          | 3288                                                                           |

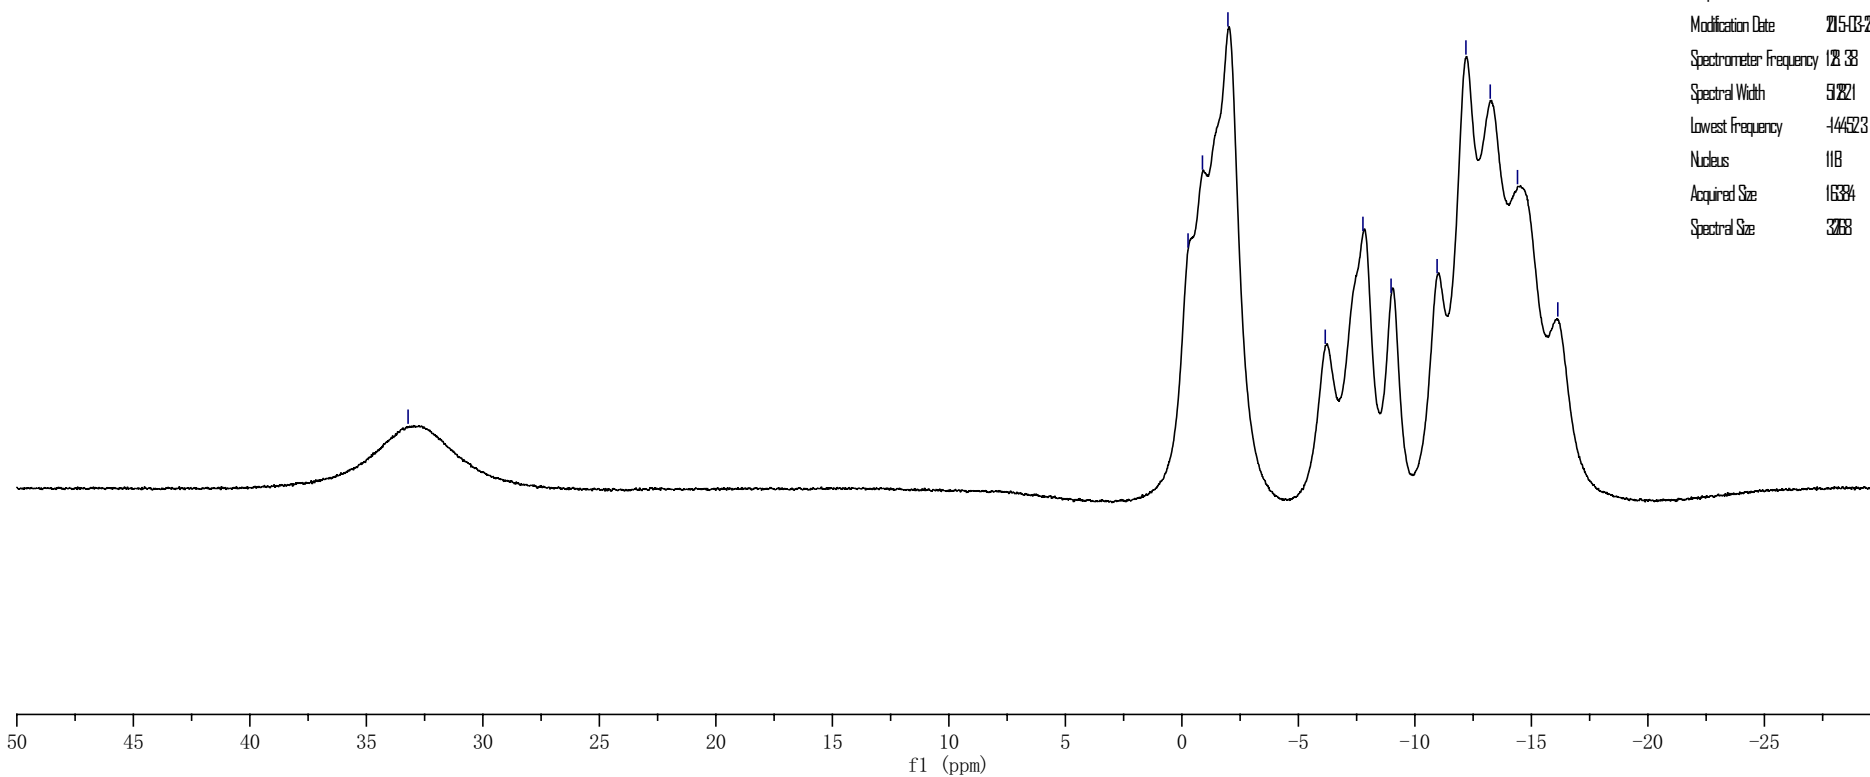

Supplementary Figure 36. <sup>11</sup>B NMR Spectrum of **2o**.

crf-3-83-H-CDCl<sub>3</sub>

7.365  
7.290  
7.101  
6.919

3.537  
3.364

1.260

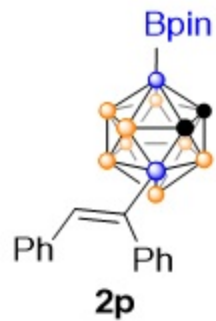

| Parameter              | Value               |
|------------------------|---------------------|
| Title                  | crf-3-83-H-027      |
| Comment                | STANDARD 1H OBSERVE |
| Origin                 | Varian              |
| Owner                  |                     |
| Site                   |                     |
| Spectrometer           | mercury             |
| Author                 | omc                 |
| Solvent                | CDCl <sub>3</sub>   |
| Temperature            | 29.0                |
| Pulse Sequence         | sZul                |
| Number of Scans        | 4                   |
| Receiver Gain          | 12                  |
| Relaxation Delay       | 1.0000              |
| Pulse Width            | 0.0000              |
| Acquisition Date       | 2015-02-07 09:59:11 |
| Spectrometer Frequency | 300.03              |
| Spectral Width         | 5494.5              |
| Lowest Frequency       | -707.9              |
| Nucleus                | <sup>1</sup> H      |
| Acquired Size          | 10376               |
| Spectral Size          | 3268                |

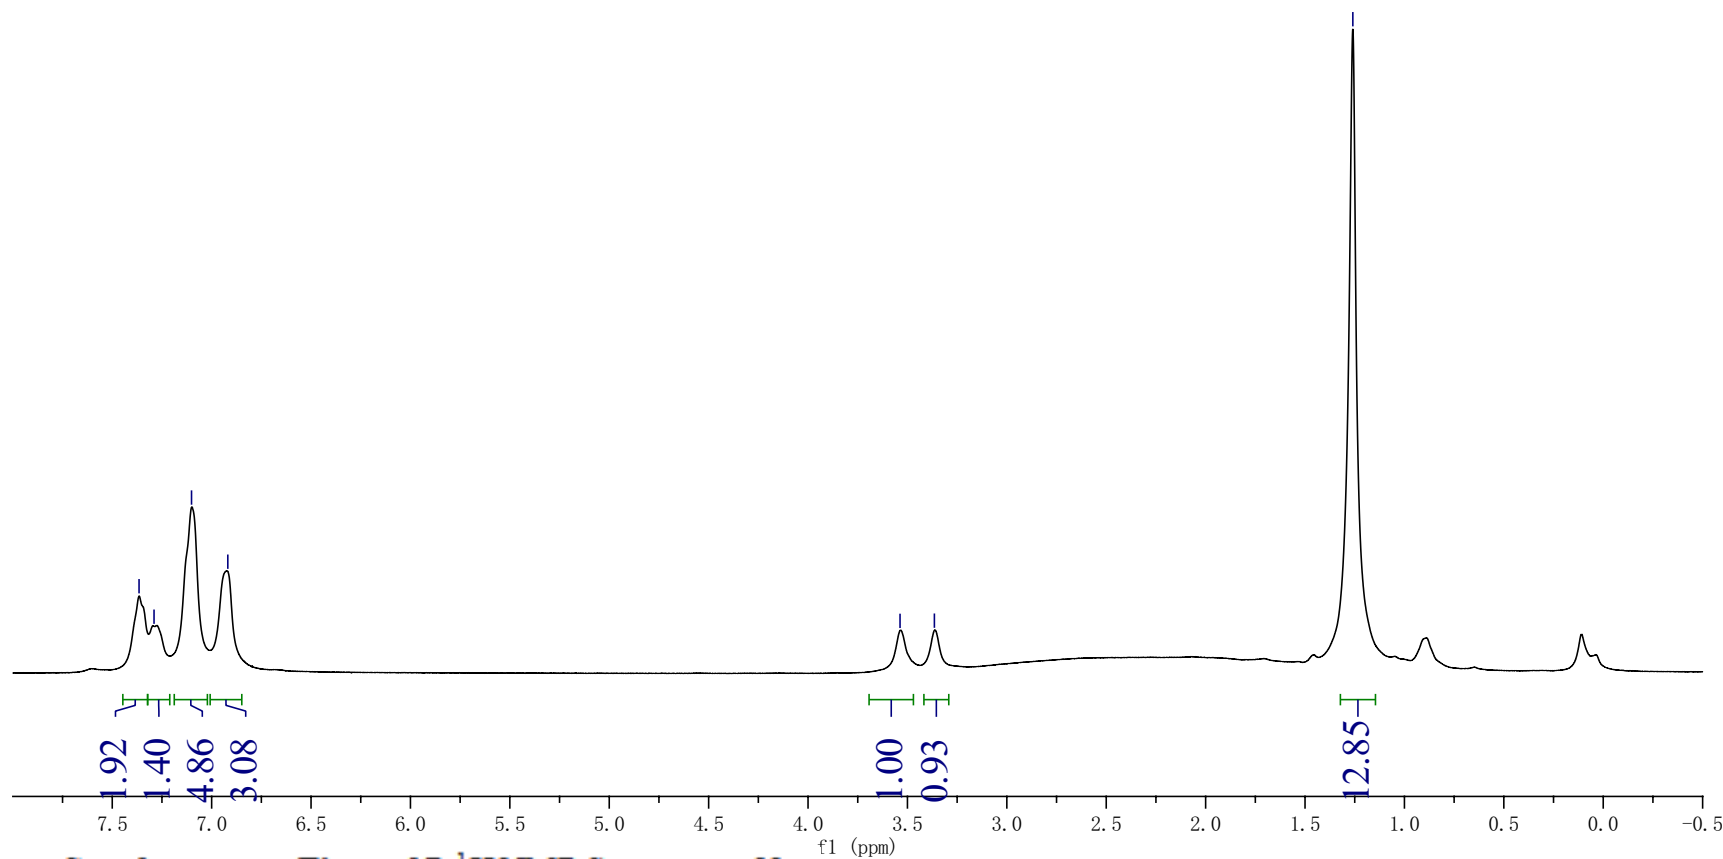

Supplementary Figure 37. <sup>1</sup>H NMR Spectrum of **2p**.

crf-3-83-C-CDCl<sub>3</sub>

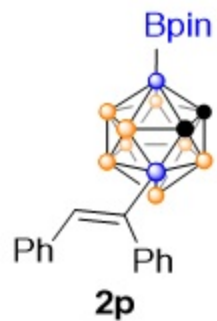

142.635  
137.746  
137.171  
129.196  
128.791  
127.712  
127.560  
126.769  
126.137

84.093  
77.340  
76.918  
76.495

55.582  
55.235

24.696  
24.633

| Parameter              | Value               |
|------------------------|---------------------|
| Title                  | crf-3-83-C          |
| Comment                | 13C OBSERVE         |
| Origin                 | Varian              |
| Owner                  |                     |
| Site                   |                     |
| Spectrometer           | mercury             |
| Author                 | omc                 |
| Solvent                | CDCl <sub>3</sub>   |
| Temperature            | 21.0                |
| Pulse Sequence         | zg30                |
| Number of Scans        | 120                 |
| Receiver Gain          | 34                  |
| Relaxation Delay       | 1.0000              |
| Pulse Width            | 0.0000              |
| Acquisition Date       | 2015-02-07 09:59:55 |
| Spectrometer Frequency | 75.45               |
| Spectral Width         | 19311.4             |
| Lowest Frequency       | 4766.4              |
| Nucleus                | 13C                 |
| Acquired Size          | 2617                |
| Spectral Size          | 65536               |

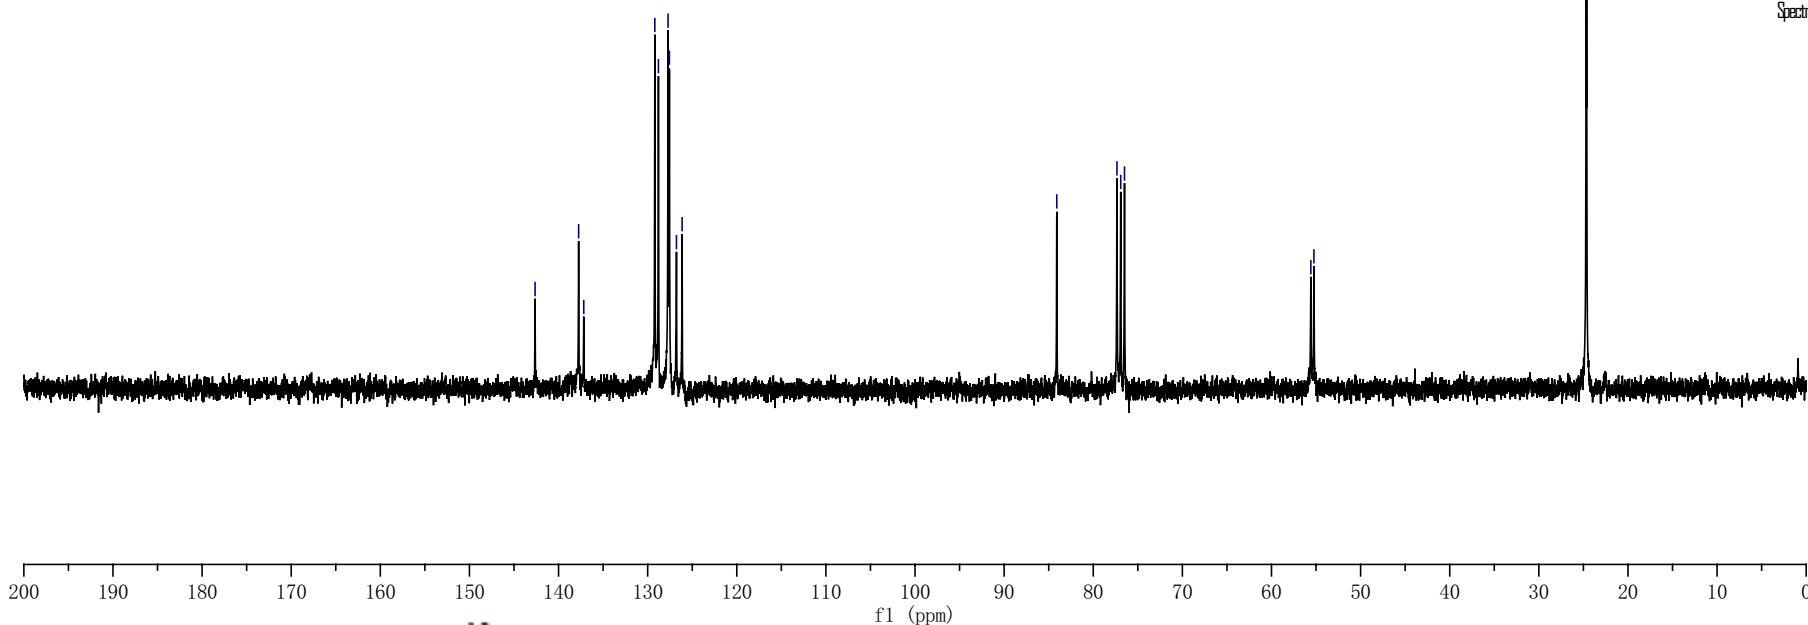

Supplementary Figure 38. <sup>13</sup>C NMR Spectrum of **2p**.

crf-3-83-B-CDCl<sub>3</sub>-decoupling

32.860

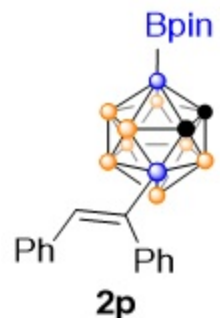

1.048  
2.190  
6.698  
8.341  
11.948  
12.544  
13.865  
15.197

| Parameter              | Value                                      |
|------------------------|--------------------------------------------|
| Data File Name         | C:/Users/Administrator/Desktop/b-cr3-83/ld |
| Title                  | Desktop                                    |
| Comment                |                                            |
| Origin                 | UNMR Bruker Analytische Messtechnik GmbH   |
| Owner                  | root                                       |
| Site                   |                                            |
| Spectrometer           | cr400                                      |
| Author                 |                                            |
| Solvent                | DMSO                                       |
| Temperature            | 300.0                                      |
| Pulse Sequence         | zing_1g                                    |
| Number of Scans        | 800                                        |
| Receiver Gain          | 32                                         |
| Relaxation Delay       | 0.0000                                     |
| Pulse Width            | 13.4000                                    |
| Acquisition Time       | 0.395                                      |
| Acquisition Date       | 2015-02-01 19:05:10                        |
| Modification Date      | 2015-02-01 12:08:00                        |
| Spectrometer Frequency | 128.38                                     |
| Spectral Width         | 51281                                      |
| Lowest Frequency       | -16480.9                                   |
| Nucleus                | 11B                                        |
| Acquired Size          | 16384                                      |
| Spectral Size          | 3268                                       |

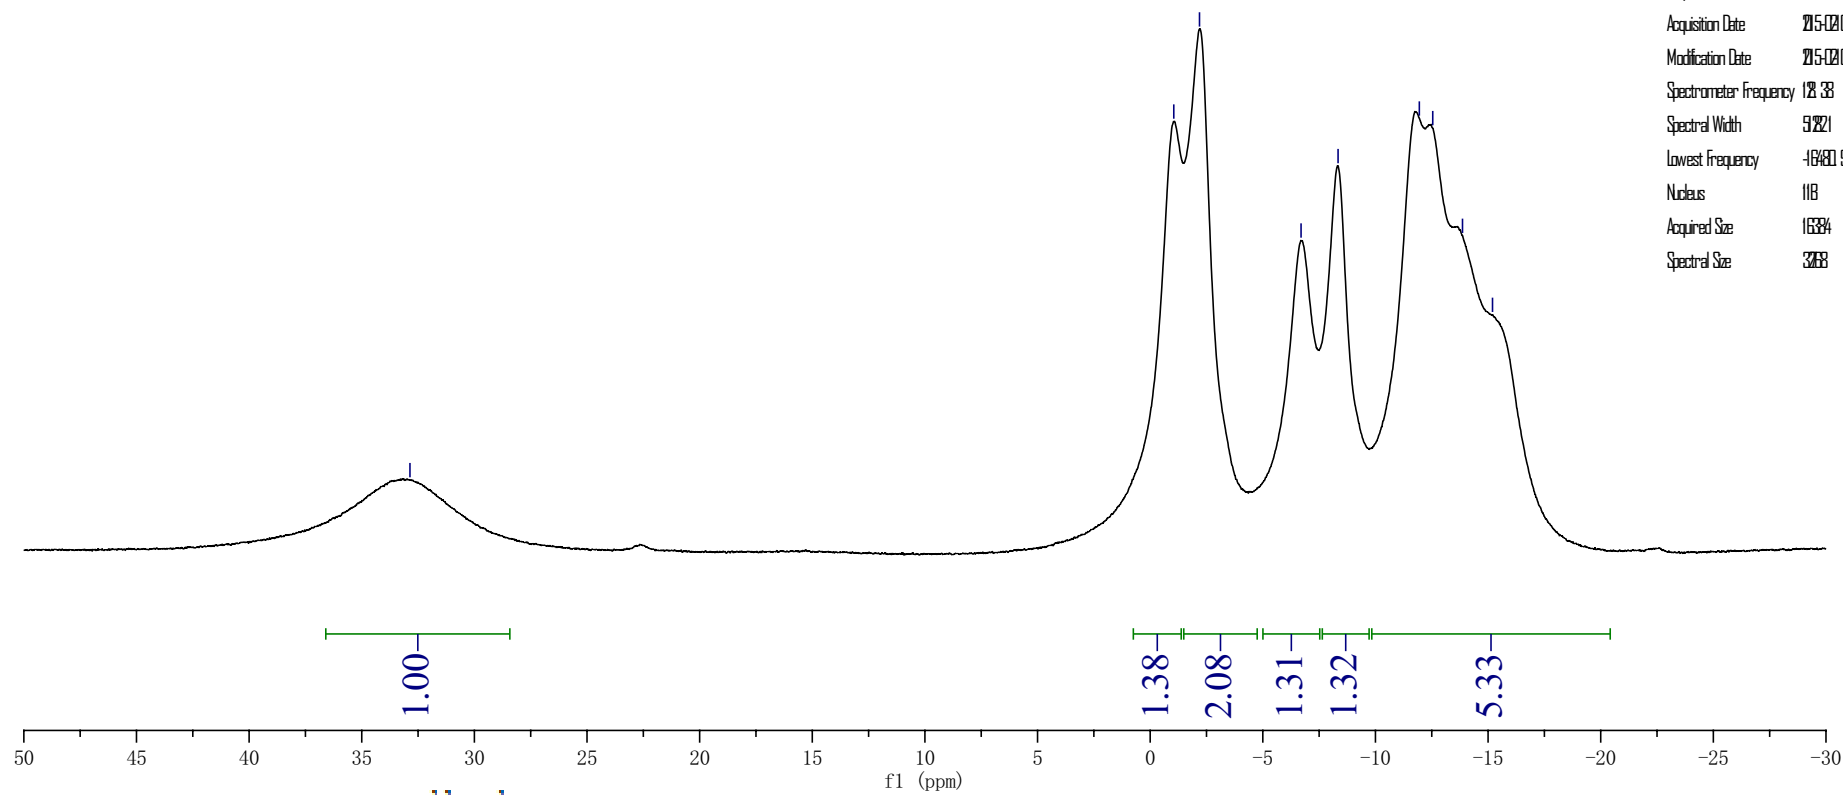

Supplementary Figure 39. <sup>11</sup>B {<sup>1</sup>H} NMR Spectrum of **2p**.

32.757

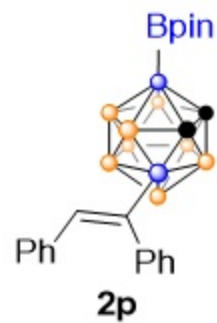

-1.721

-6.213

-7.697

-8.907

-12.212

-13.216

| Parameter              | Value                                                          |
|------------------------|----------------------------------------------------------------|
| Data File Name         | E:/Users/Administrator/Desktop/b-crf3-83-withoutdecoupling/fid |
| Title                  | Desktop                                                        |
| Comment                |                                                                |
| Origin                 | UNMR Bruker Analytische Messtechnik GmbH                       |
| Owner                  | root                                                           |
| Site                   |                                                                |
| Spectrometer           | dx400                                                          |
| Author                 |                                                                |
| Solvent                | DMSO                                                           |
| Temperature            | 300.0                                                          |
| Pulse Sequence         | aring1gy                                                       |
| Number of Scans        | 800                                                            |
| Receiver Gain          | 32                                                             |
| Relaxation Delay       | 0.0000                                                         |
| Pulse Width            | 13.4000                                                        |
| Acquisition Time       | 0.3155                                                         |
| Acquisition Date       | 2015-02-07 19:14:18                                            |
| Modification Date      | 2015-02-07 12:16:00                                            |
| Spectrometer Frequency | 128.38                                                         |
| Spectral Width         | 51221                                                          |
| Lowest Frequency       | -16480.9                                                       |
| Nucleus                | 11B                                                            |
| Acquired Size          | 16384                                                          |
| Spectral Size          | 32768                                                          |

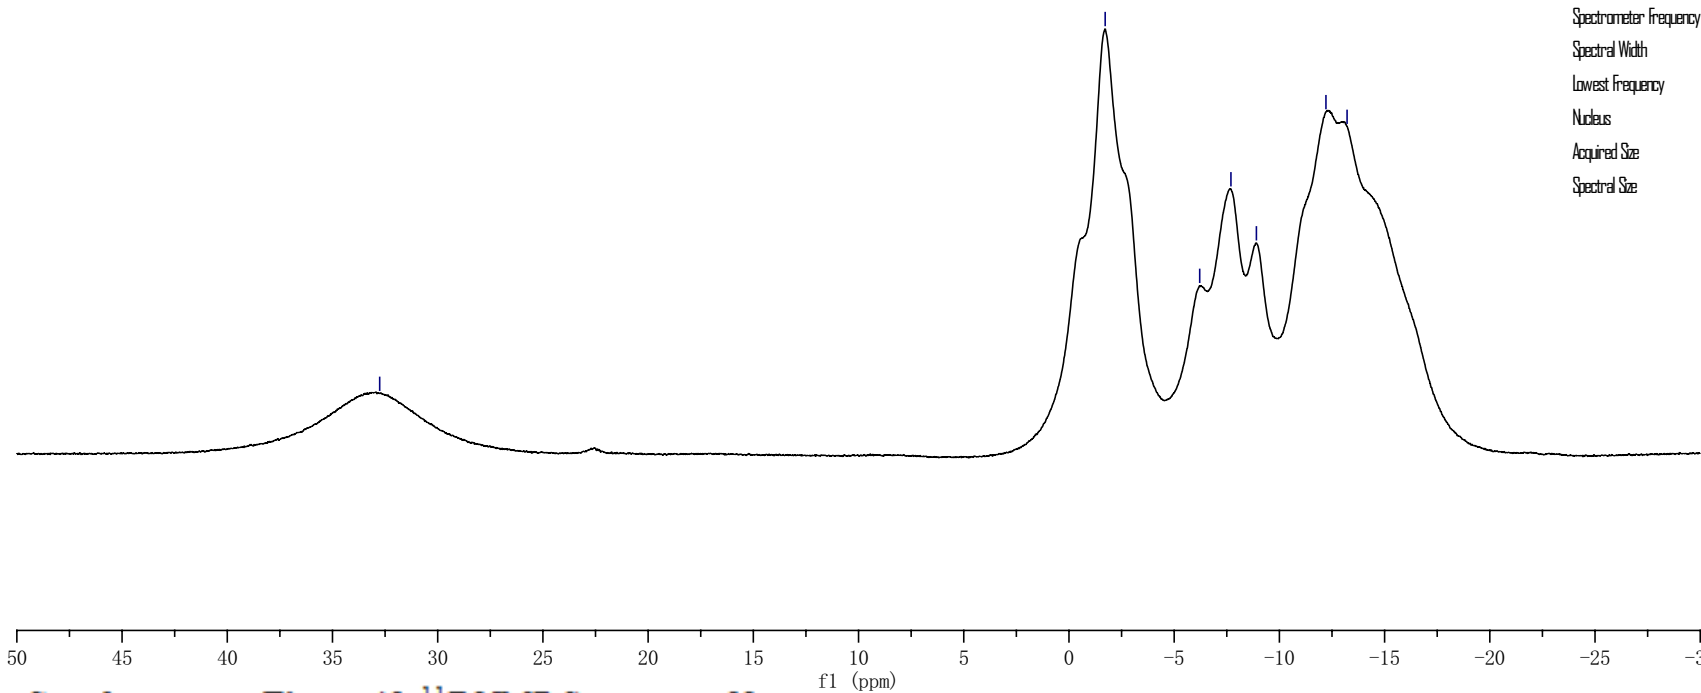

Supplementary Figure 40. <sup>11</sup>B NMR Spectrum of **2p**.

crf-3-95-H -CDCl<sub>3</sub>

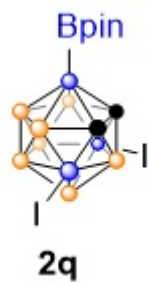

7.260

4.114

1.268

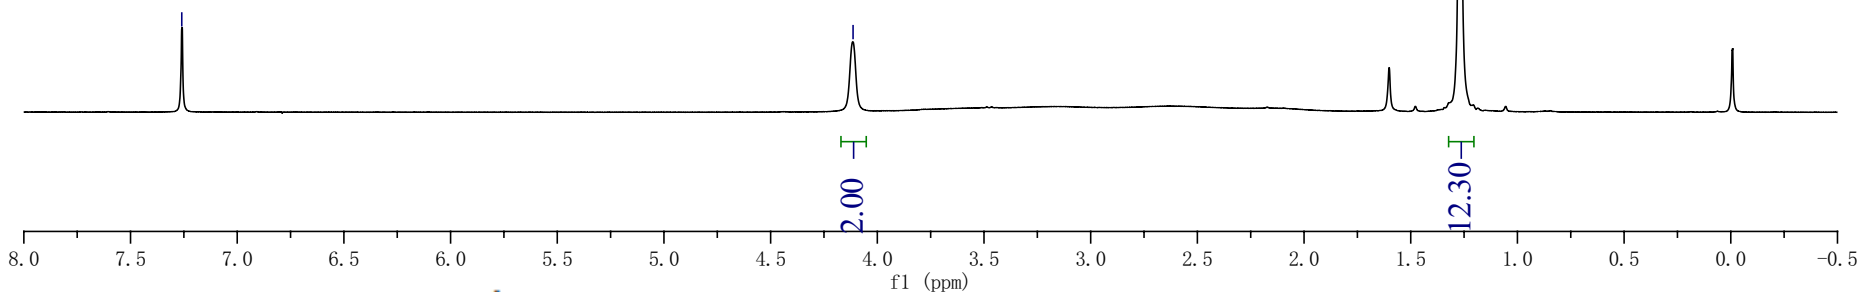

| Parameter              | Value               |
|------------------------|---------------------|
| Title                  | crf-3-95-h          |
| Comment                | STANDARD 1H OBSERVE |
| Origin                 | Varian              |
| Owner                  |                     |
| Site                   |                     |
| Spectrometer           | mercury             |
| Author                 | onc                 |
| Solvent                | CDCl <sub>3</sub>   |
| Temperature            | 29.0                |
| Pulse Sequence         | sgpu                |
| Number of Scans        | 12                  |
| Receiver Gain          | 30                  |
| Relaxation Delay       | 1.0000              |
| Pulse Width            | 0.0000              |
| Acquisition Date       | 2015-03-07 12:49:20 |
| Spectrometer Frequency | 300.03              |
| Spectral Width         | 5494.5              |
| Lowest Frequency       | -70.2               |
| Nucleus                | <sup>1</sup> H      |
| Acquired Size          | 10976               |
| Spectral Size          | 3068                |

Supplementary Figure 41. <sup>1</sup>H NMR Spectrum of **2q**.

crf-3-95-C-CDCl<sub>3</sub>

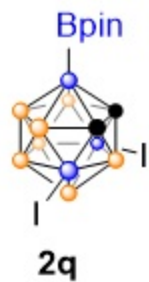

84.672

77.319

76.898

76.473

60.314

24.756

| Parameter              | Value               |
|------------------------|---------------------|
| Title                  | crf-3-95-C          |
| Comment                | 13C OBSRV           |
| Origin                 | Varian              |
| Owner                  |                     |
| Site                   |                     |
| Spectrometer           | mercury             |
| Author                 | omc                 |
| Solvent                | CDCl <sub>3</sub>   |
| Temperature            | 21.0                |
| Pulse Sequence         | sZul                |
| Number of Scans        | 52                  |
| Receiver Gain          | 32                  |
| Relaxation Delay       | 1.0000              |
| Pulse Width            | 0.0000              |
| Acquisition Date       | 2015-03-07 21:32:52 |
| Spectrometer Frequency | 75.45               |
| Spectral Width         | 1901.4              |
| Lowest Frequency       | -4766.4             |
| Nucleus                | 13C                 |
| Acquired Size          | 2817                |
| Spectral Size          | 65536               |

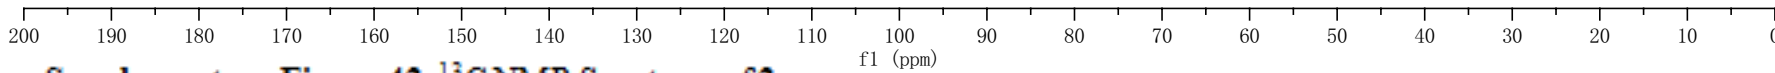

Supplementary Figure 42. <sup>13</sup>C NMR Spectrum of **2q**.

crf-3-95-B-decoupling-CDCl<sub>3</sub>

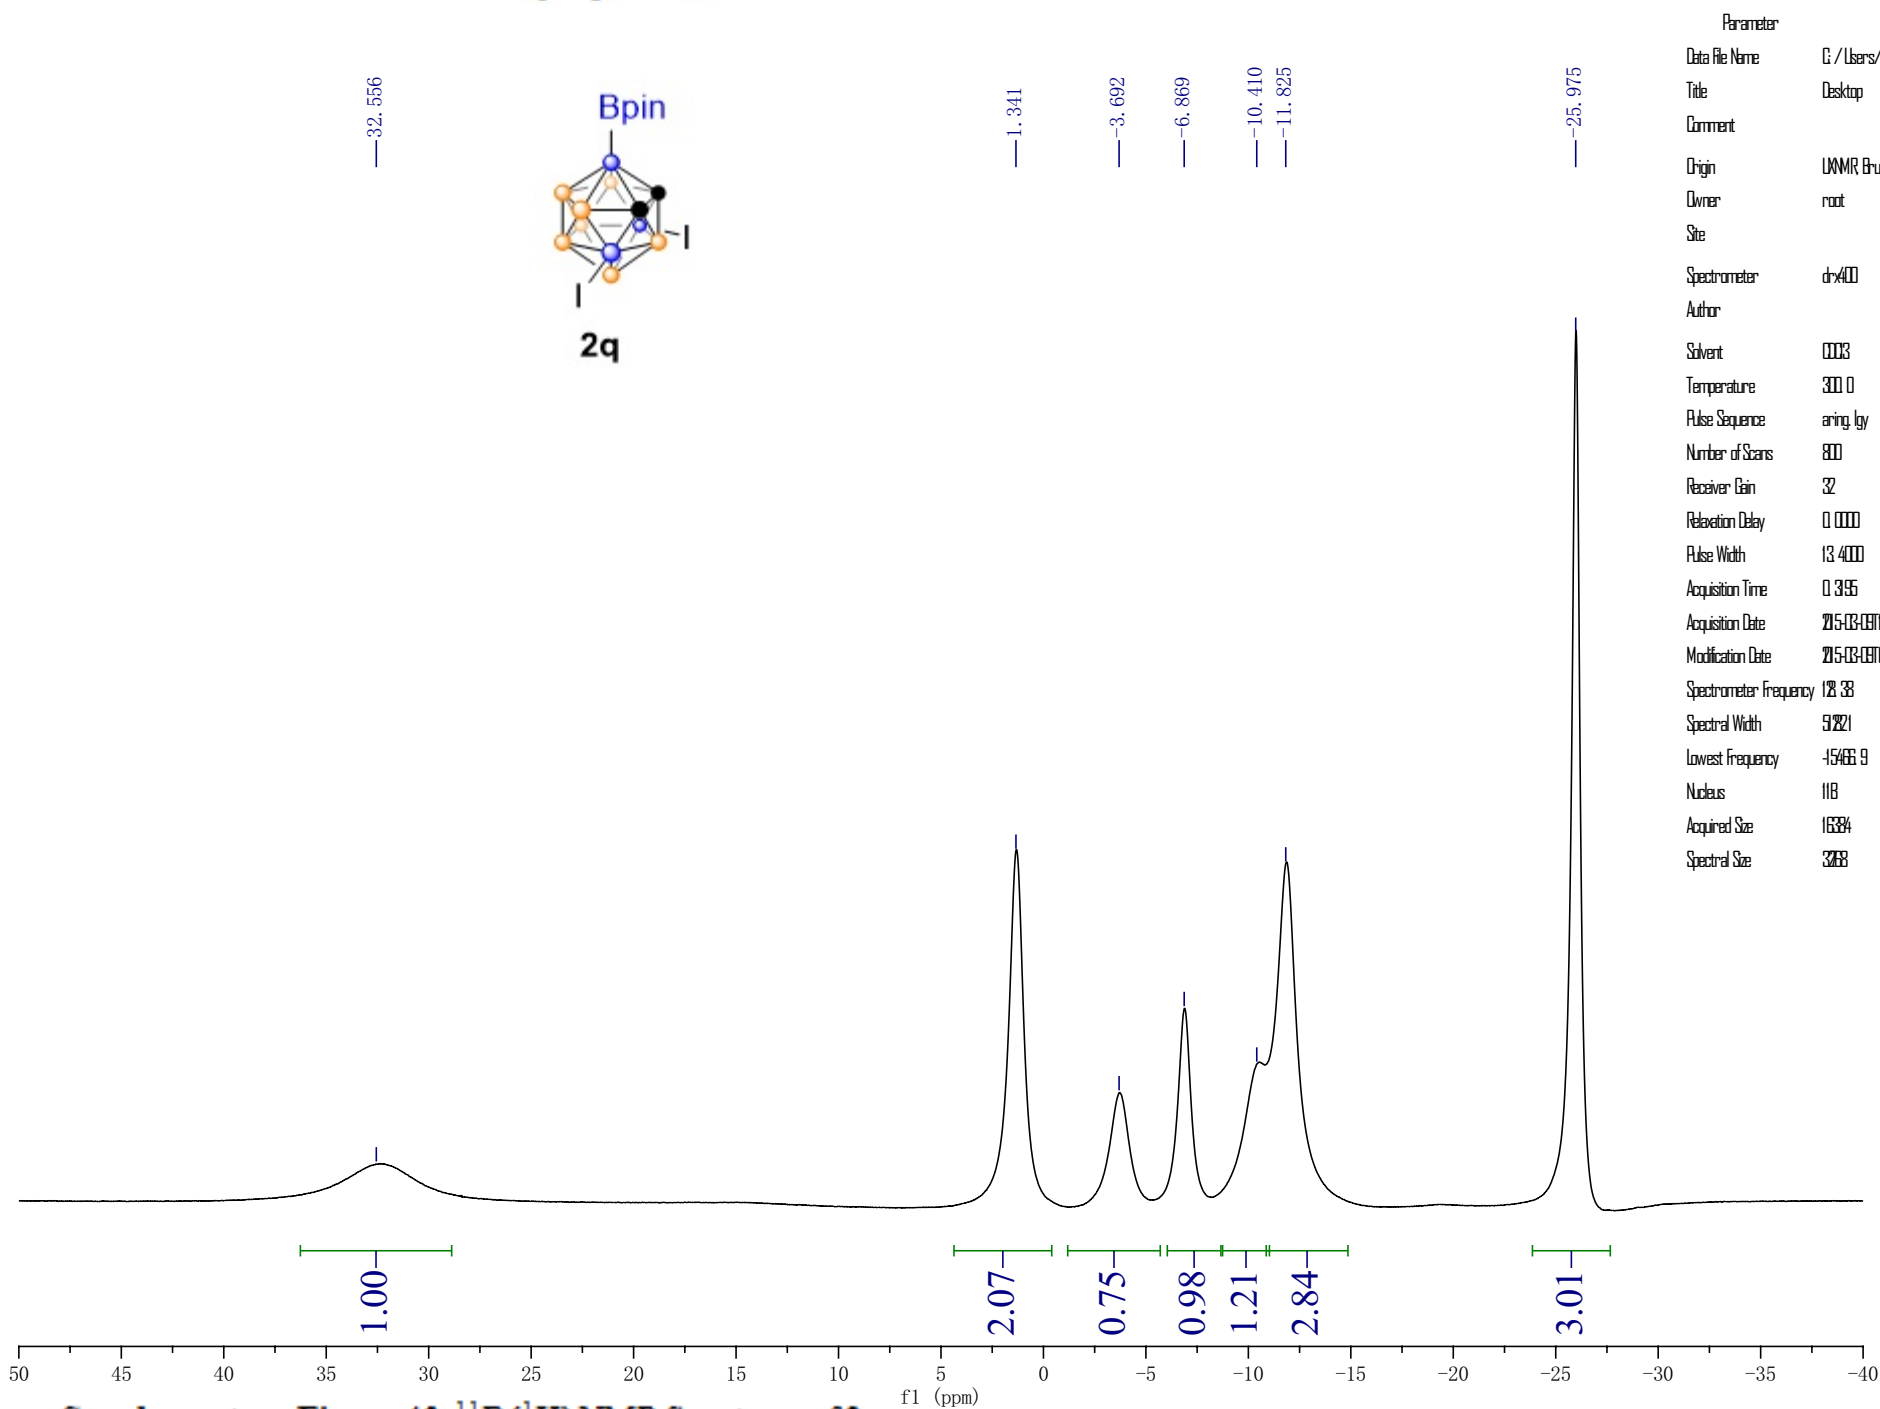

| Parameter              | Value                                       |
|------------------------|---------------------------------------------|
| Data File Name         | G:/Users/Administrator/Desktop/b-crf3-95/td |
| Title                  | Desktop                                     |
| Comment                |                                             |
| Origin                 | UNMR Bruker Analytische Messtechnik GmbH    |
| Owner                  | root                                        |
| Site                   |                                             |
| Spectrometer           | dx400                                       |
| Author                 |                                             |
| Solvent                | CDCl <sub>3</sub>                           |
| Temperature            | 300.0                                       |
| Pulse Sequence         | aring.1g                                    |
| Number of Scans        | 800                                         |
| Receiver Gain          | 32                                          |
| Relaxation Delay       | 0.0000                                      |
| Pulse Width            | 13.4000                                     |
| Acquisition Time       | 0.395                                       |
| Acquisition Date       | 2015-03-09 04: 3                            |
| Modification Date      | 2015-03-09 04: 00                           |
| Spectrometer Frequency | 128.38                                      |
| Spectral Width         | 91221                                       |
| Lowest Frequency       | -15466.9                                    |
| Nucleus                | <sup>11</sup> B                             |
| Acquired Size          | 16384                                       |
| Spectral Size          | 3268                                        |

Supplementary Figure 43. <sup>11</sup>B{<sup>1</sup>H} NMR Spectrum of **2q**.



crf-3-95-B-coupling-CDCl<sub>3</sub>

— 32.258

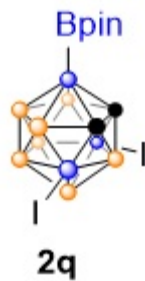

— 1.862  
— 0.699

— 3.199  
— 4.170

— 6.320  
— 7.507

— 9.928  
— 11.245  
— 12.506

— 25.995

| Parameter              | Value                                                |
|------------------------|------------------------------------------------------|
| Data File Name         | C:/Users/Administrator/Desktop/b-cr3-95-coupling/fid |
| Title                  | Desktop                                              |
| Comment                |                                                      |
| Origin                 | UNMR Bruker Analytische Messtechnik GmbH             |
| Owner                  | root                                                 |
| Site                   |                                                      |
| Spectrometer           | drx400                                               |
| Author                 |                                                      |
| Solvent                | CDCl <sub>3</sub>                                    |
| Temperature            | 300.0                                                |
| Pulse Sequence         | aring1g                                              |
| Number of Scans        | 800                                                  |
| Receiver Gain          | 32                                                   |
| Relaxation Delay       | 0.0000                                               |
| Pulse Width            | 13.4000                                              |
| Acquisition Time       | 0.395                                                |
| Acquisition Date       | 2015-03-09 16:08:28                                  |
| Modification Date      | 2015-03-09 16:08:00                                  |
| Spectrometer Frequency | 128.38                                               |
| Spectral Width         | 51221                                                |
| Lowest Frequency       | -15466.9                                             |
| Nucleus                | 11B                                                  |
| Acquired Size          | 16384                                                |
| Spectral Size          | 3068                                                 |

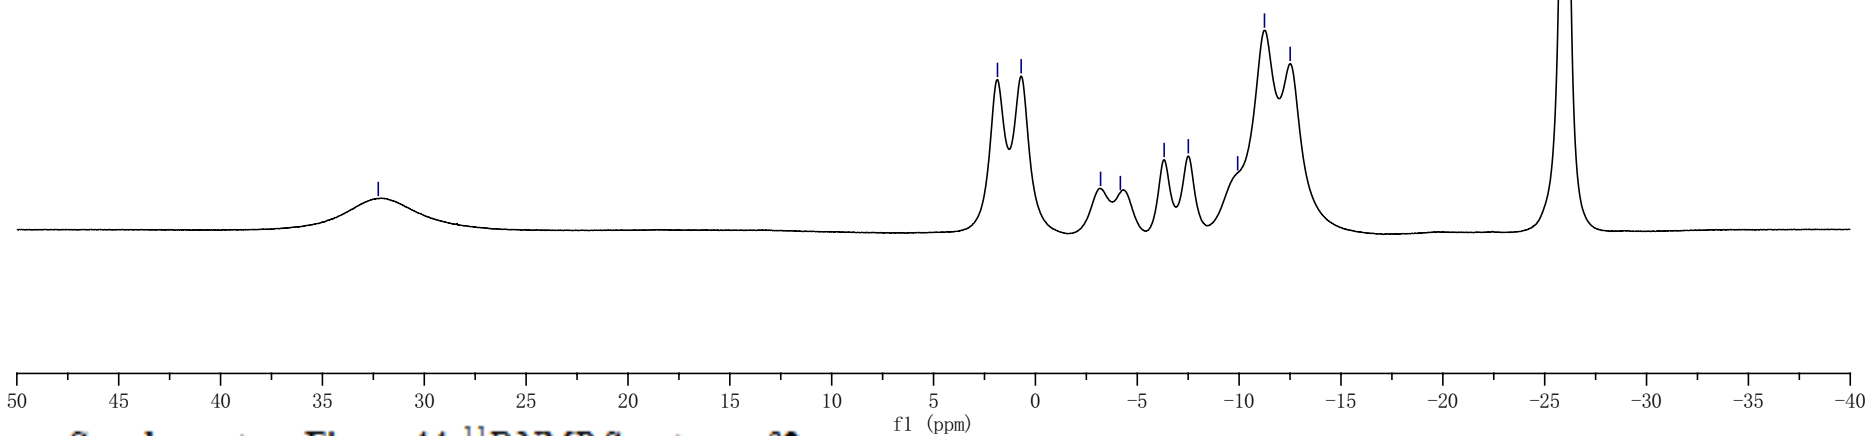

Supplementary Figure 44. <sup>11</sup>B NMR Spectrum of **2q**.

crf-3-64-H-CDCl<sub>3</sub>

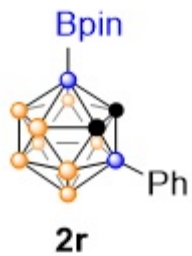

7.645  
7.412  
7.260

3.713

1.270

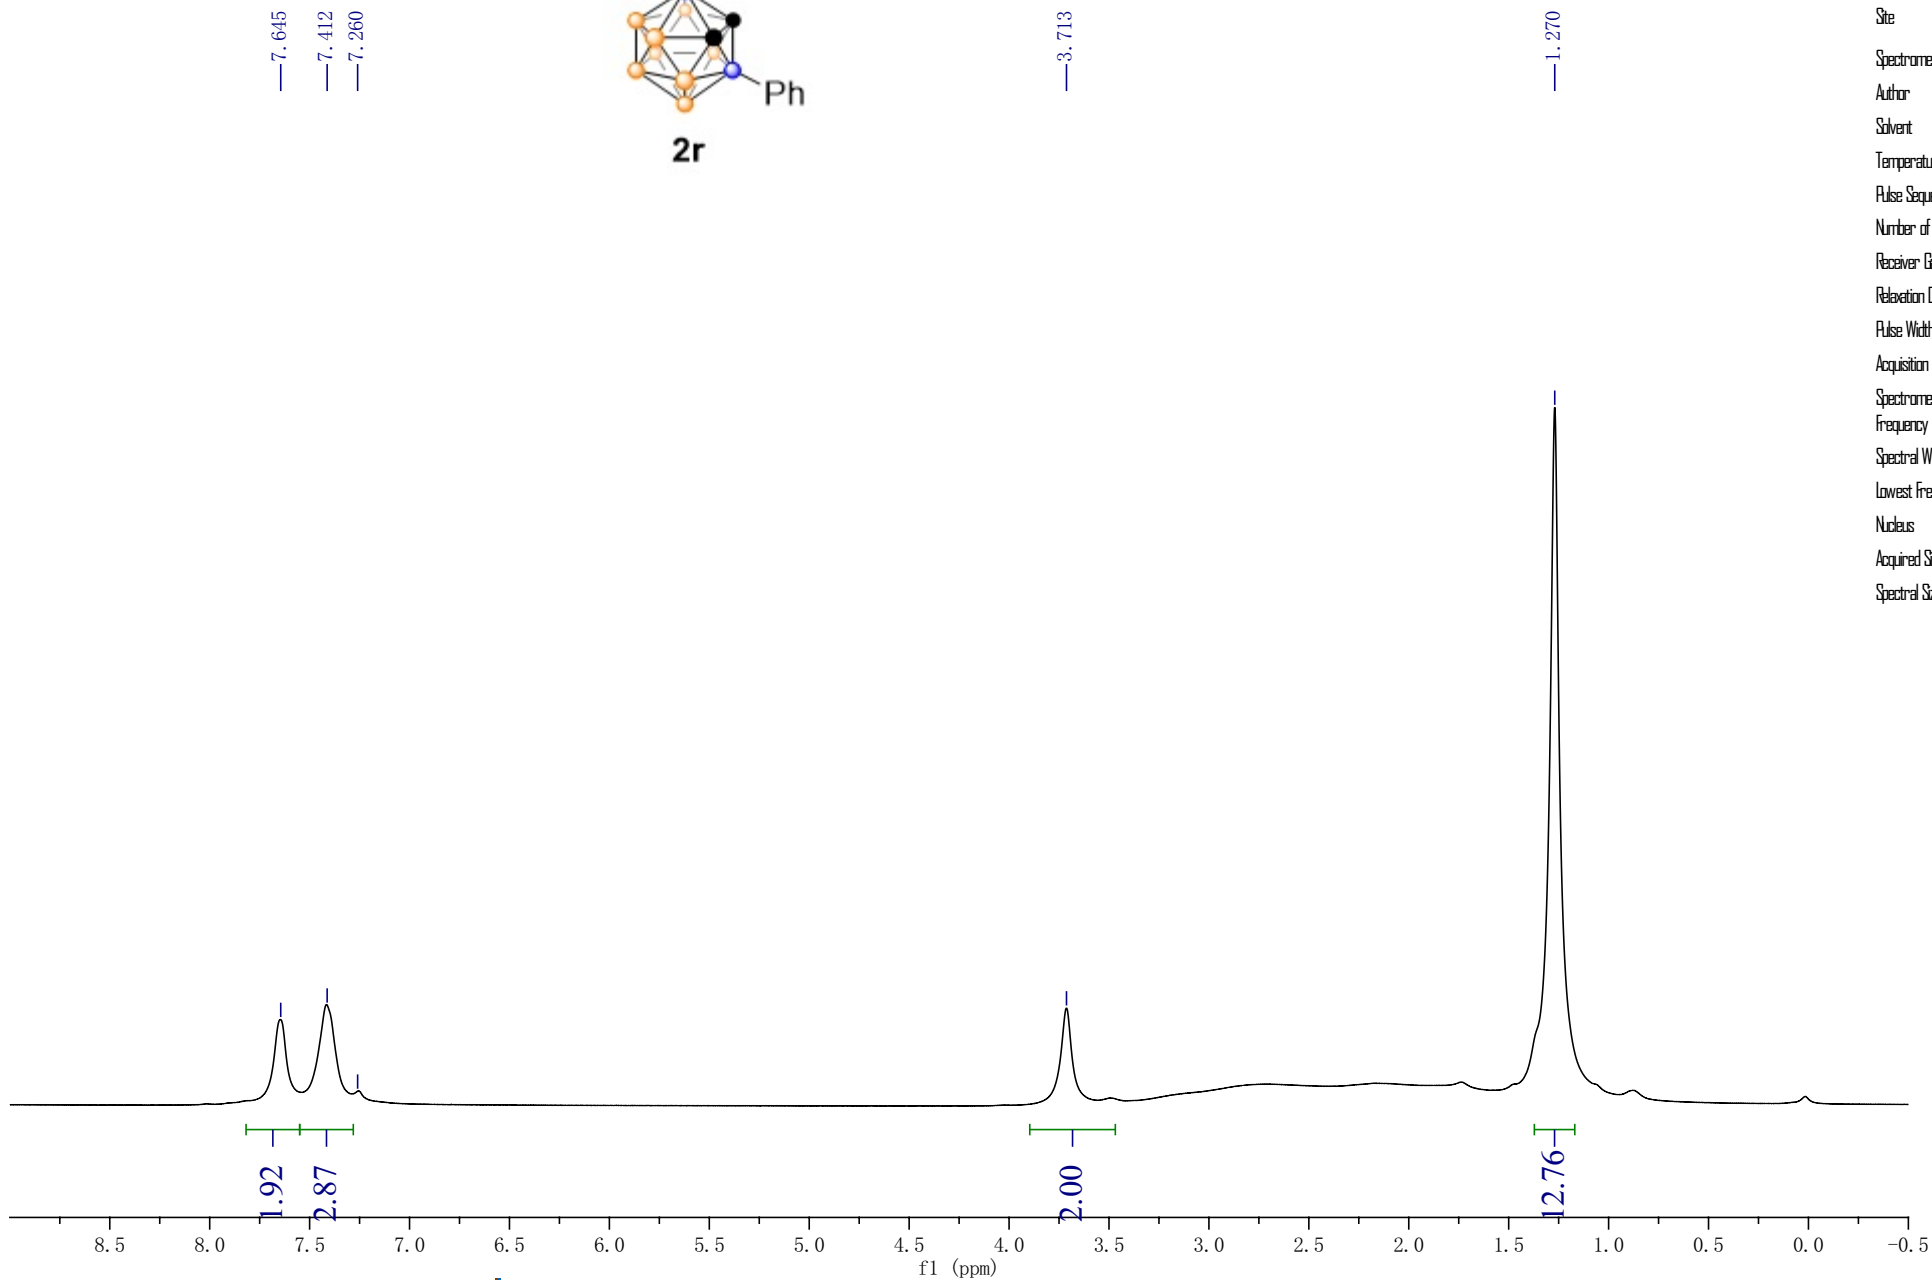

| Parameter              | Value               |
|------------------------|---------------------|
| Title                  | crf3-64-H           |
| Comment                | STANDARD 1H CDSERVE |
| Origin                 | Varian              |
| Owner                  |                     |
| Site                   |                     |
| Spectrometer           | mercury             |
| Author                 | onc                 |
| Solvent                | CDCl3               |
| Temperature            | 28.0                |
| Pulse Sequence         | sgul                |
| Number of Scans        | 12                  |
| Receiver Gain          | 16                  |
| Relaxation Delay       | 1.0000              |
| Pulse Width            | 0.0000              |
| Acquisition Date       | 2015-01-28 12:03:48 |
| Spectrometer Frequency | 300.03              |
| Spectral Width         | 5494.5              |
| Lowest Frequency       | -708.1              |
| Nucleus                | 1H                  |
| Acquired Size          | 10376               |
| Spectral Size          | 3268                |

Supplementary Figure 45. <sup>1</sup>H NMR Spectrum of **2r**.

crf-3-64-C-CDCl<sub>3</sub>

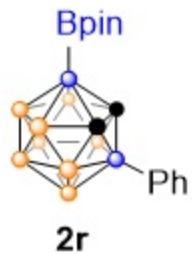

133.540  
129.926  
128.466

84.567  
77.716  
77.300  
76.870

58.676

25.113

| Parameter              | Value             |
|------------------------|-------------------|
| Title                  | crf-3-64-C        |
| Comment                | 13C OBSRV         |
| Origin                 | Varian            |
| Owner                  |                   |
| Site                   |                   |
| Spectrometer           | mercury           |
| Author                 | onc               |
| Solvent                | CDCl <sub>3</sub> |
| Temperature            | 29.0              |
| Pulse Sequence         | sgpul             |
| Number of Scans        | 120               |
| Receiver Gain          | 30                |
| Relaxation Delay       | 1.0000            |
| Pulse Width            | 0.0000            |
| Acquisition Date       | 2015-01-27 10:50  |
| Spectrometer Frequency | 75.45             |
| Spectral Width         | 18897.0           |
| Lowest Frequency       | -162.8            |
| Nucleus                | 13C               |
| Acquired Size          | 2895              |
| Spectral Size          | 65536             |

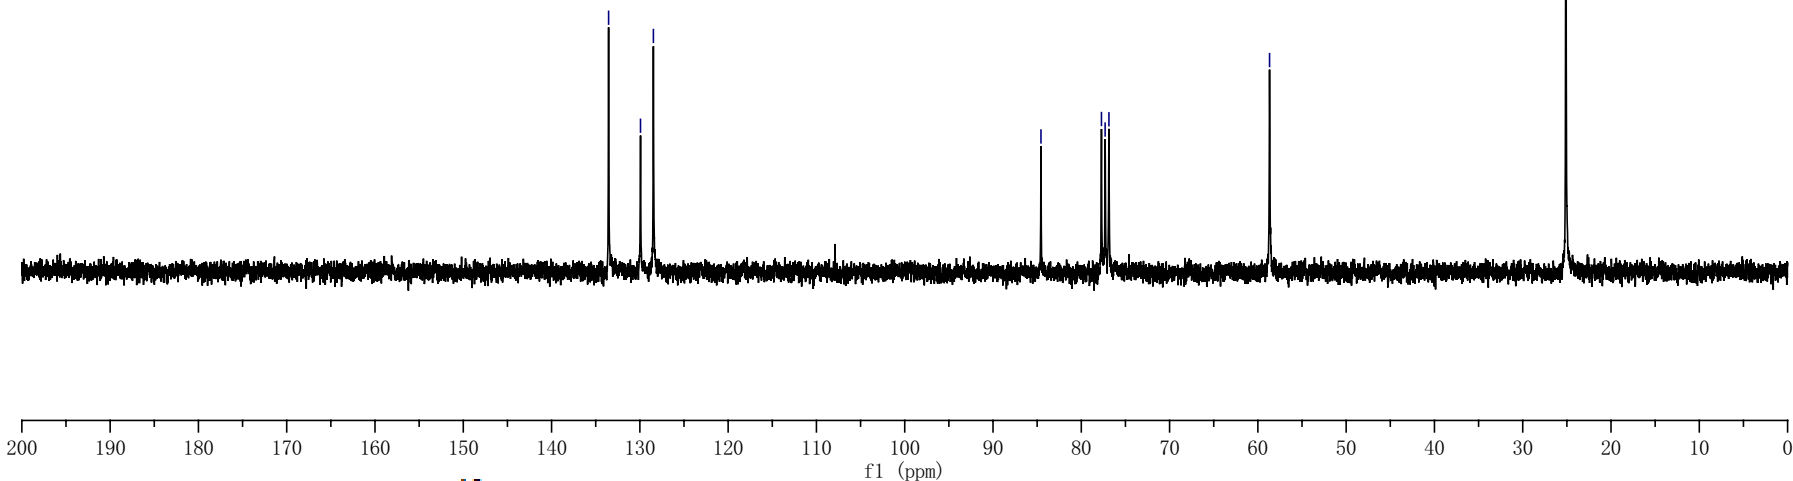

Supplementary Figure 46. <sup>13</sup>C NMR Spectrum of 2r.

crf-3-64-B- decoupling -CDCl<sub>3</sub>

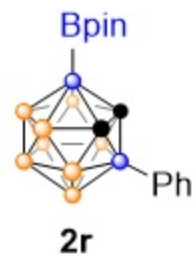

—32.849

—1.429

—4.501

—6.696

—11.878  
—12.695

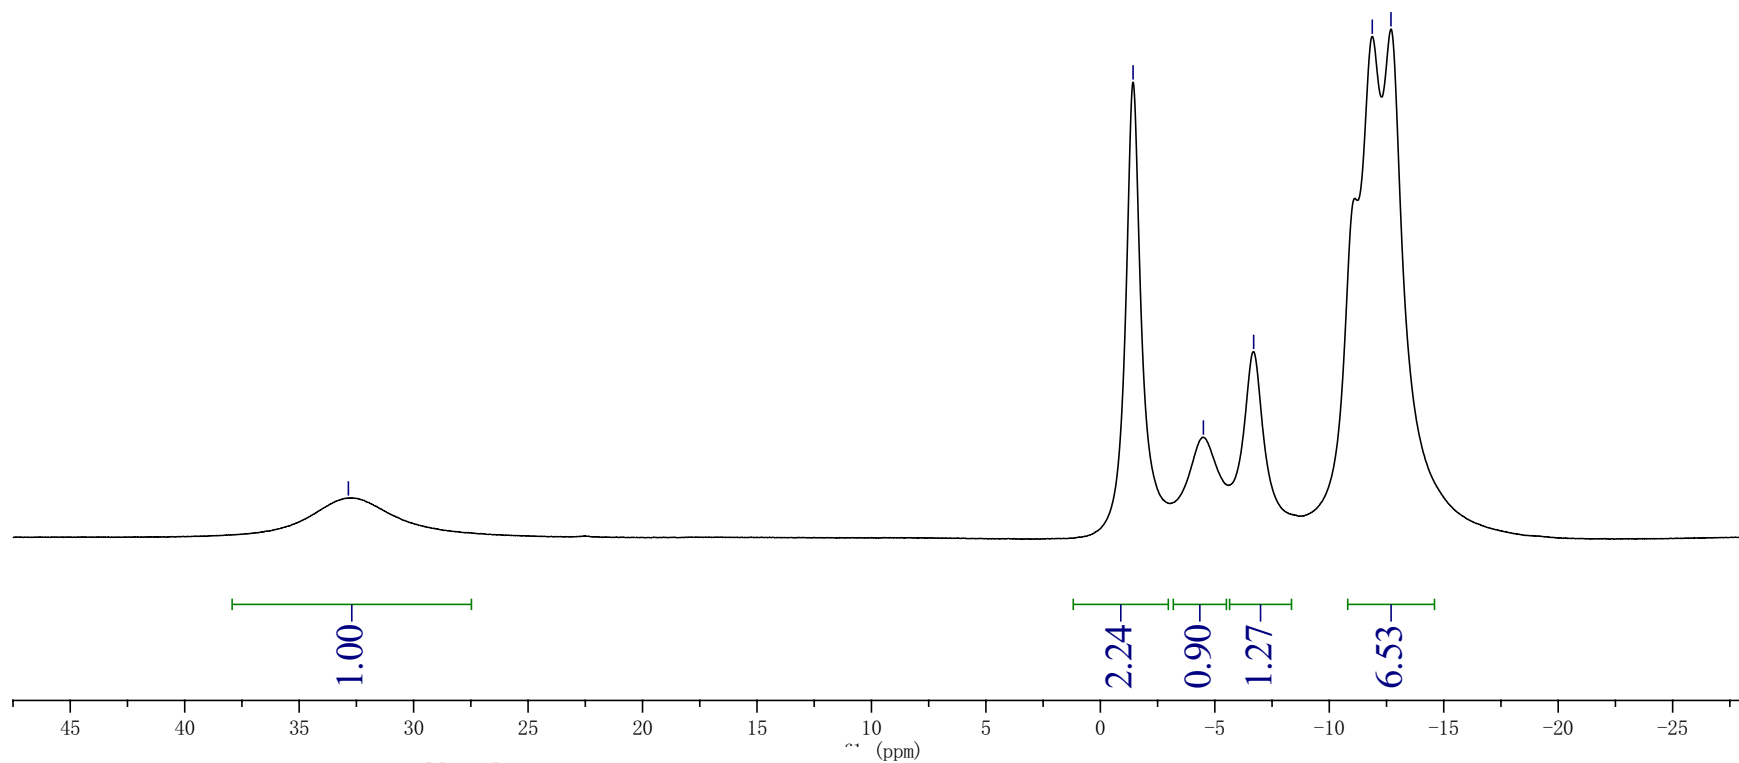

| Parameter              | Value                                        |
|------------------------|----------------------------------------------|
| Data File Name         | G:/Users/Administrator/Desktop/b-crf3-64/fid |
| Title                  | Desktop                                      |
| Comment                |                                              |
| Origin                 | UNMR Bruker Analytische Messtechnik GmbH     |
| Owner                  | root                                         |
| Site                   |                                              |
| Spectrometer           | chr400                                       |
| Author                 |                                              |
| Solvent                | DMSO                                         |
| Temperature            | 300.0                                        |
| Pulse Sequence         | aring.ty                                     |
| Number of Scans        | 168                                          |
| Receiver Gain          | 32                                           |
| Relaxation Delay       | 0.0000                                       |
| Pulse Width            | 13.4000                                      |
| Acquisition Time       | 0.395                                        |
| Acquisition Date       | 2015-01-26 18:03:14                          |
| Modification Date      | 2015-01-26 11:11:00                          |
| Spectrometer Frequency | 128.38                                       |
| Spectral Width         | 59221                                        |
| Lowest Frequency       | -14649.0                                     |
| Nucleus                | 11B                                          |
| Acquired Size          | 16394                                        |
| Spectral Size          | 3268                                         |

Supplementary Figure 47. <sup>11</sup>B{<sup>1</sup>H} NMR Spectrum of **2r**.

— 32.854

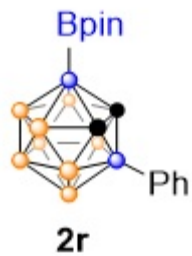

— 0.814

— 1.976

— 4.568

— 6.099

— 7.206

— 12.145

— 13.214

| Parameter              | Value                                                          |
|------------------------|----------------------------------------------------------------|
| Data File Name         | C:/Users/Administrator/Desktop/b-cr-3-64-withoutdecoupling/fid |
| Title                  | Desktop                                                        |
| Comment                |                                                                |
| Origin                 | UNMR Bruker Analytische Messtechnik GmbH                       |
| Owner                  | root                                                           |
| Site                   |                                                                |
| Spectrometer           | chr400                                                         |
| Author                 |                                                                |
| Solvent                | DMSO                                                           |
| Temperature            | 300.0                                                          |
| Pulse Sequence         | aring.tgy                                                      |
| Number of Scans        | 1115                                                           |
| Receiver Gain          | 32                                                             |
| Relaxation Delay       | 0.0000                                                         |
| Pulse Width            | 13.4000                                                        |
| Acquisition Time       | 0.395                                                          |
| Acquisition Date       | 2015-01-26T18:17:02                                            |
| Modification Date      | 2015-01-26T11:17:00                                            |
| Spectrometer Frequency | 128.38                                                         |
| Spectral Width         | 51221                                                          |
| Lowest Frequency       | -44649.0                                                       |
| Nucleus                | <sup>11</sup> B                                                |
| Acquired Size          | 16394                                                          |
| Spectral Size          | 3268                                                           |

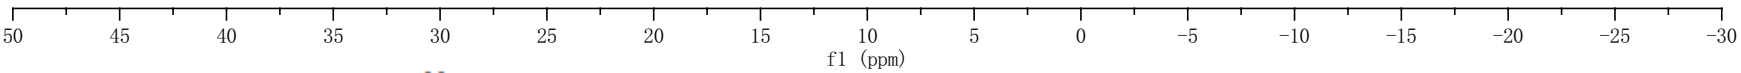

Supplementary Figure 48. <sup>11</sup>B NMR Spectrum of **2r**.

crf-CB-Bpin<sub>2</sub>-H-CDCl<sub>3</sub>

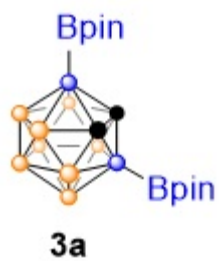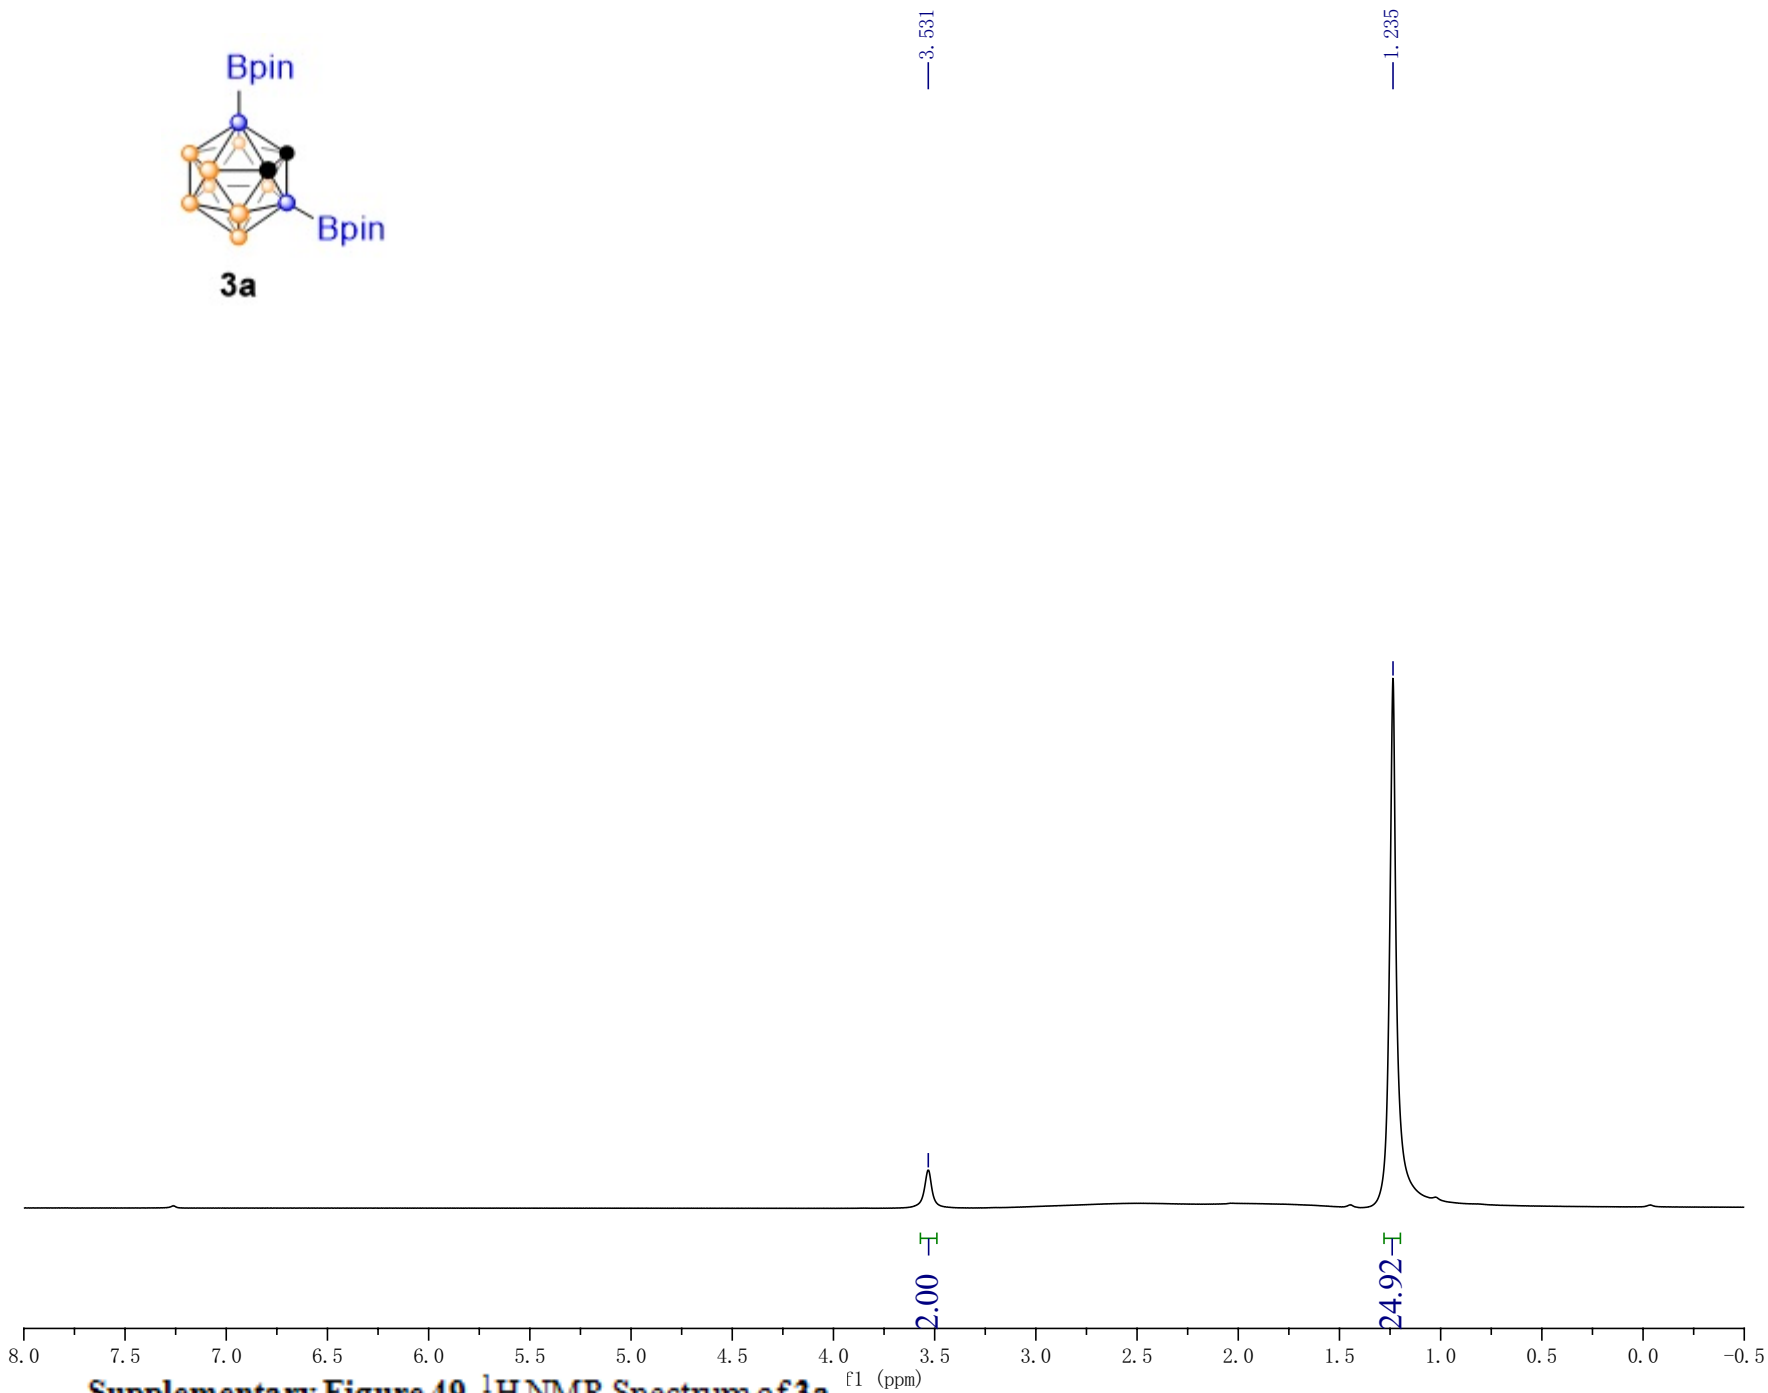

| Parameter              | Value               |
|------------------------|---------------------|
| Title                  | crfCB@pin2          |
| Comment                | STANDARD 1H OBSERVE |
| Origin                 | Varian              |
| Owner                  |                     |
| Site                   |                     |
| Spectrometer           | mercury             |
| Author                 | omc                 |
| Solvent                | CDCl3               |
| Temperature            | 29.0                |
| Pulse Sequence         | sZul                |
| Number of Scans        | 21                  |
| Receiver Gain          | 10                  |
| Relaxation Delay       | 1.0000              |
| Pulse Width            | 0.0000              |
| Acquisition Date       | 2015-04-17 15:28:22 |
| Spectrometer Frequency | 300.03              |
| Spectral Width         | 5494.5              |
| Lowest Frequency       | -707.4              |
| Nucleus                | 1H                  |
| Acquired Size          | 10976               |
| Spectral Size          | 3268                |

Supplementary Figure 49. <sup>1</sup>H NMR Spectrum of 3a.

crf-CB-Bpin<sub>2</sub>-C-CDCl<sub>3</sub>

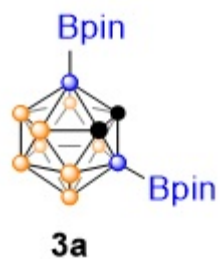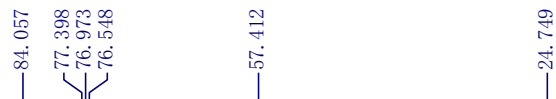

| Parameter              | Value               |
|------------------------|---------------------|
| Title                  | crf-CB-Bpin2C       |
| Comment                | 13C OBSERVE         |
| Origin                 | Varian              |
| Owner                  |                     |
| Site                   |                     |
| Spectrometer           | mercury             |
| Author                 | omc                 |
| Solvent                | CDCl3               |
| Temperature            | 28.0                |
| Pulse Sequence         | sgpl                |
| Number of Scans        | 40                  |
| Receiver Gain          | 32                  |
| Relaxation Delay       | 1.0000              |
| Pulse Width            | 0.0000              |
| Acquisition Date       | 2015-04-17 15:24:47 |
| Spectrometer Frequency | 75.45               |
| Spectral Width         | 18887.0             |
| Lowest Frequency       | -1681.2             |
| Nucleus                | 13C                 |
| Acquired Size          | 3006                |
| Spectral Size          | 65536               |

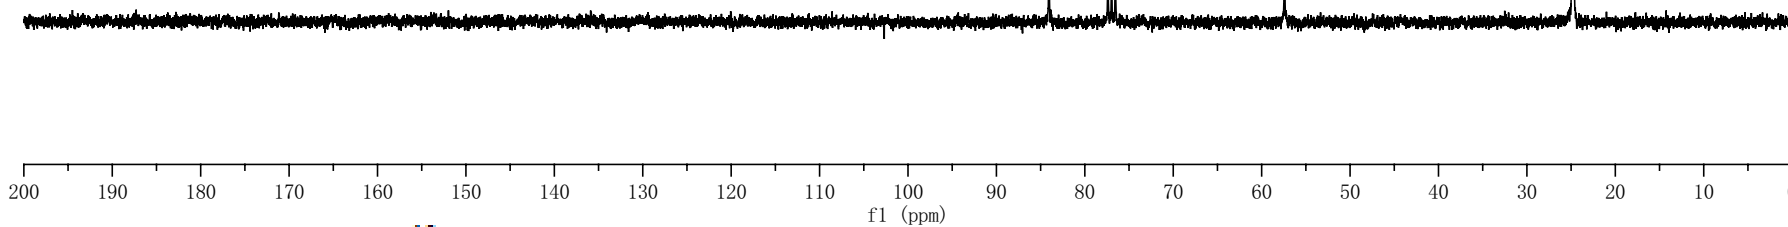

Supplementary Figure 50. <sup>13</sup>C NMR Spectrum of 3a.

crf-CB-Bpin<sub>2</sub>-B-decoupling-CDCl<sub>3</sub>

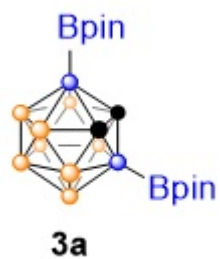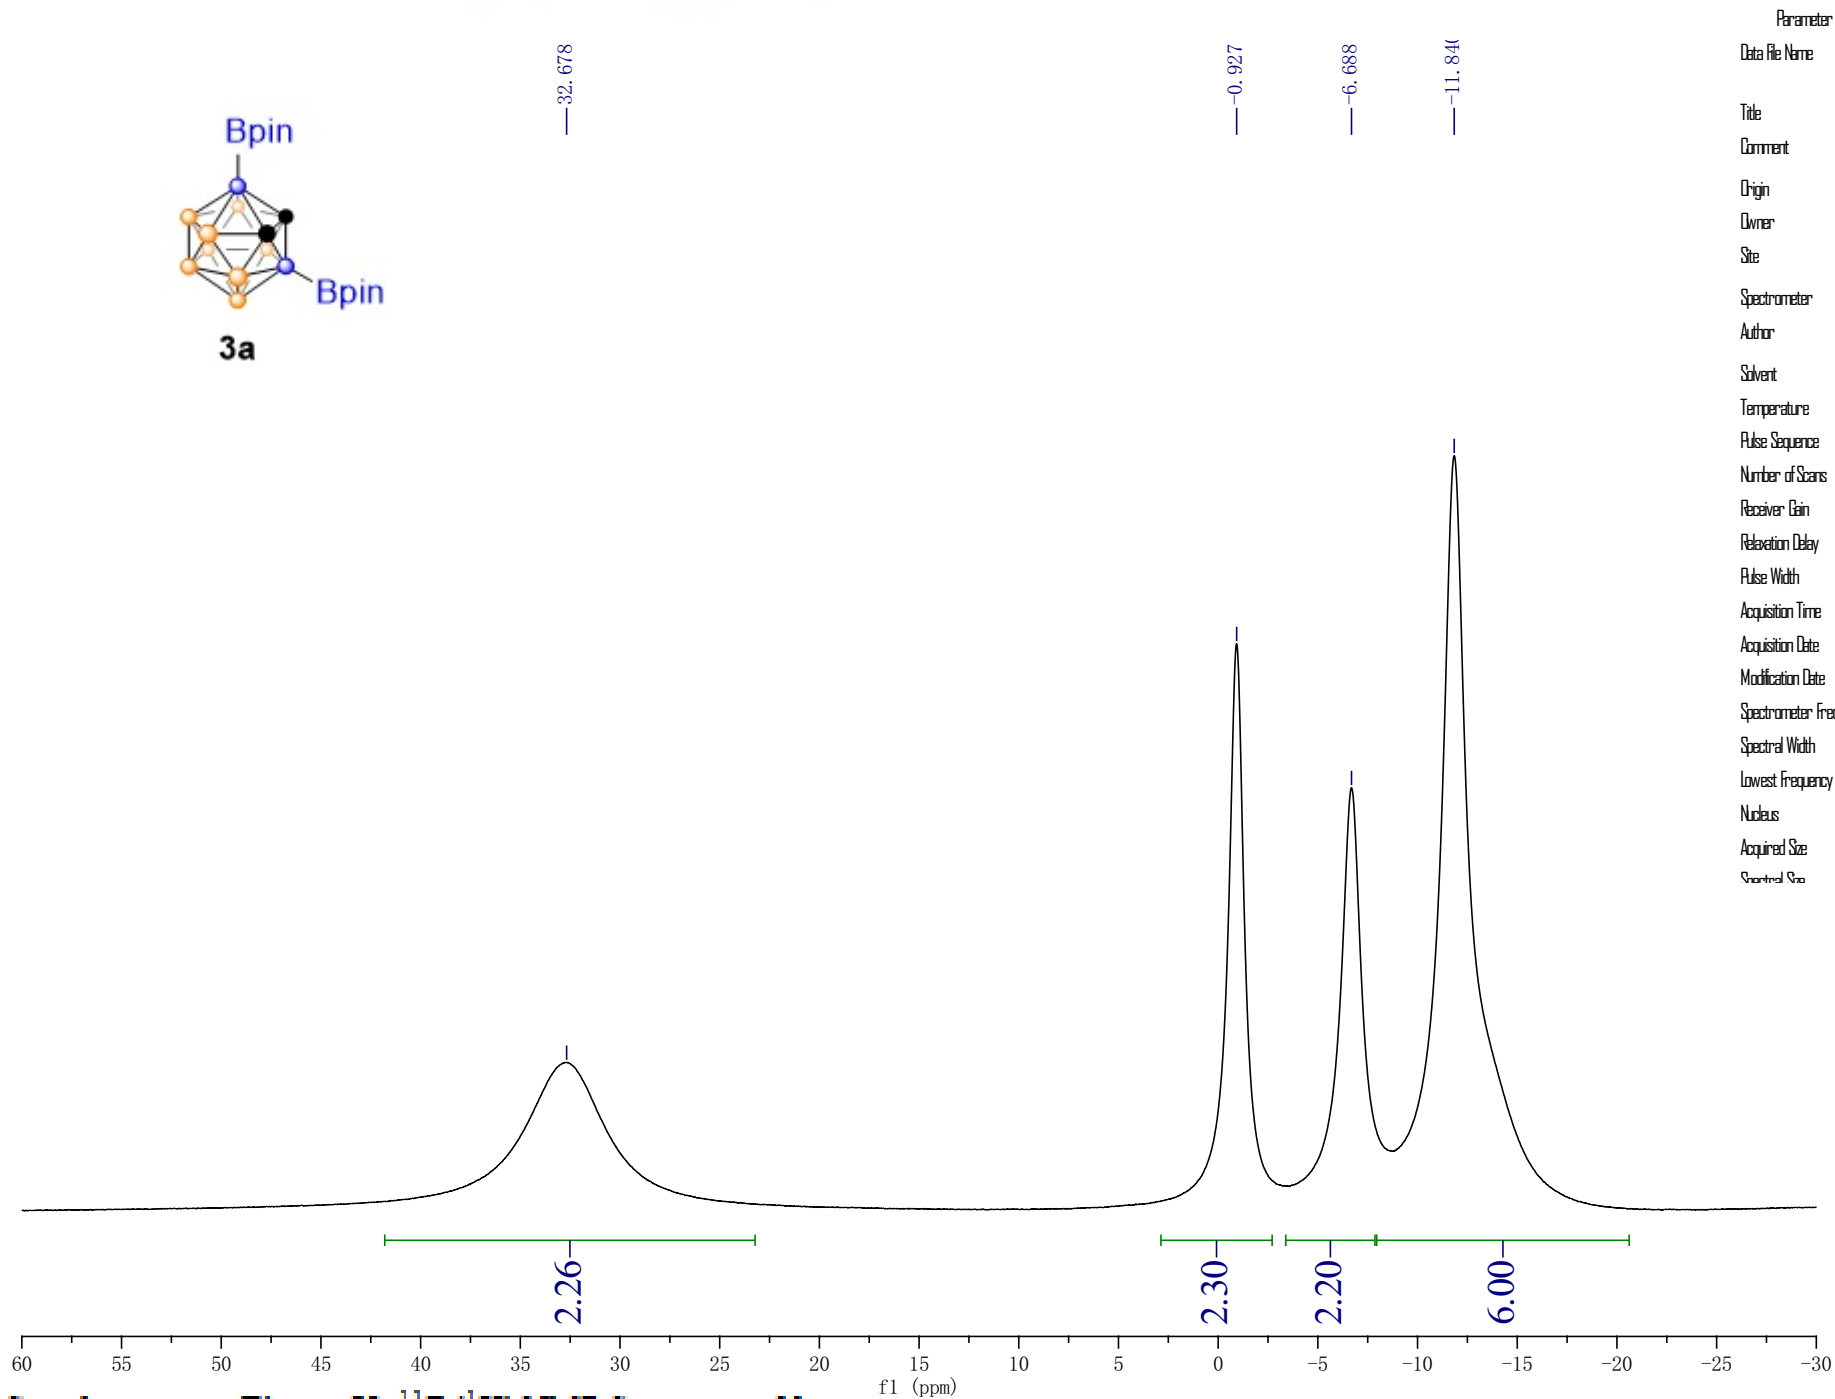

| Parameter              | Value                                                        |
|------------------------|--------------------------------------------------------------|
| Data File Name         | C:/Users/Administrator/Desktop/work/送样NMR/b-cr/crb-bpin-2/1d |
| Title                  | 送样NMR                                                        |
| Comment                |                                                              |
| Origin                 | UNMR Bruker Analytische Messtechnik GmbH                     |
| Owner                  | root                                                         |
| Site                   |                                                              |
| Spectrometer           | dx400                                                        |
| Author                 |                                                              |
| Solvent                | CDCl <sub>3</sub>                                            |
| Temperature            | 300.0                                                        |
| Pulse Sequence         | aring.tgy                                                    |
| Number of Scans        | 739                                                          |
| Receiver Gain          | 32                                                           |
| Relaxation Delay       | 0.0000                                                       |
| Pulse Width            | 13.4000                                                      |
| Acquisition Time       | 0.3155                                                       |
| Acquisition Date       | 215-04-30 12:00:19                                           |
| Modification Date      | 215-04-30 13:01:00                                           |
| Spectrometer Frequency | 128.38                                                       |
| Spectral Width         | 9.2821                                                       |
| Lowest Frequency       | -17849.0                                                     |
| Nucleus                | <sup>11</sup> B                                              |
| Acquired Size          | 16384                                                        |
| Scanned Size           | 2048                                                         |

Supplementary Figure 51. <sup>11</sup>B {<sup>1</sup>H} NMR Spectrum of 3a.



crf-CB-Bpin<sub>2</sub>-B-coupling-CDCl<sub>3</sub>

33.073

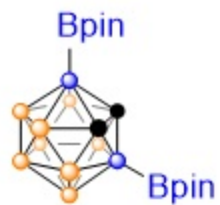

3a

-0.009

-1.188

-5.785

-7.003

-10.981

-12.268

| Parameter              | Value                                                                                   |
|------------------------|-----------------------------------------------------------------------------------------|
| Data File Name         | G:/Users/Administrator/Desktop/work/送样NMR/loralatom/cb-Bpin2/b-crf-cb-bpin2coupling/fid |
| Title                  | cb-Bpin2                                                                                |
| Comment                |                                                                                         |
| Origin                 | UNMR Bruker Analytische Messtechnik GmbH                                                |
| Owner                  | root                                                                                    |
| Site                   |                                                                                         |
| Spectrometer           | dx400                                                                                   |
| Author                 |                                                                                         |
| Solvent                | DMSO                                                                                    |
| Temperature            | 300.0                                                                                   |
| Pulse Sequence         | aring 1gy                                                                               |
| Number of Scans        | 800                                                                                     |
| Receiver Gain          | 32                                                                                      |
| Relaxation Delay       | 0.0000                                                                                  |
| Pulse Width            | 13.4000                                                                                 |
| Acquisition Time       | 0.395                                                                                   |
| Acquisition Date       | 2015-06-01 19:08:28                                                                     |
| Modification Date      | 2015-06-01 13:08:00                                                                     |
| Spectrometer Frequency | 128.38                                                                                  |
| Spectral Width         | 51.821                                                                                  |
| Lowest Frequency       | -14486.9                                                                                |
| Nucleus                | <sup>11</sup> B                                                                         |
| Acquired Size          | 16384                                                                                   |
| Spectral Size          | 3288                                                                                    |

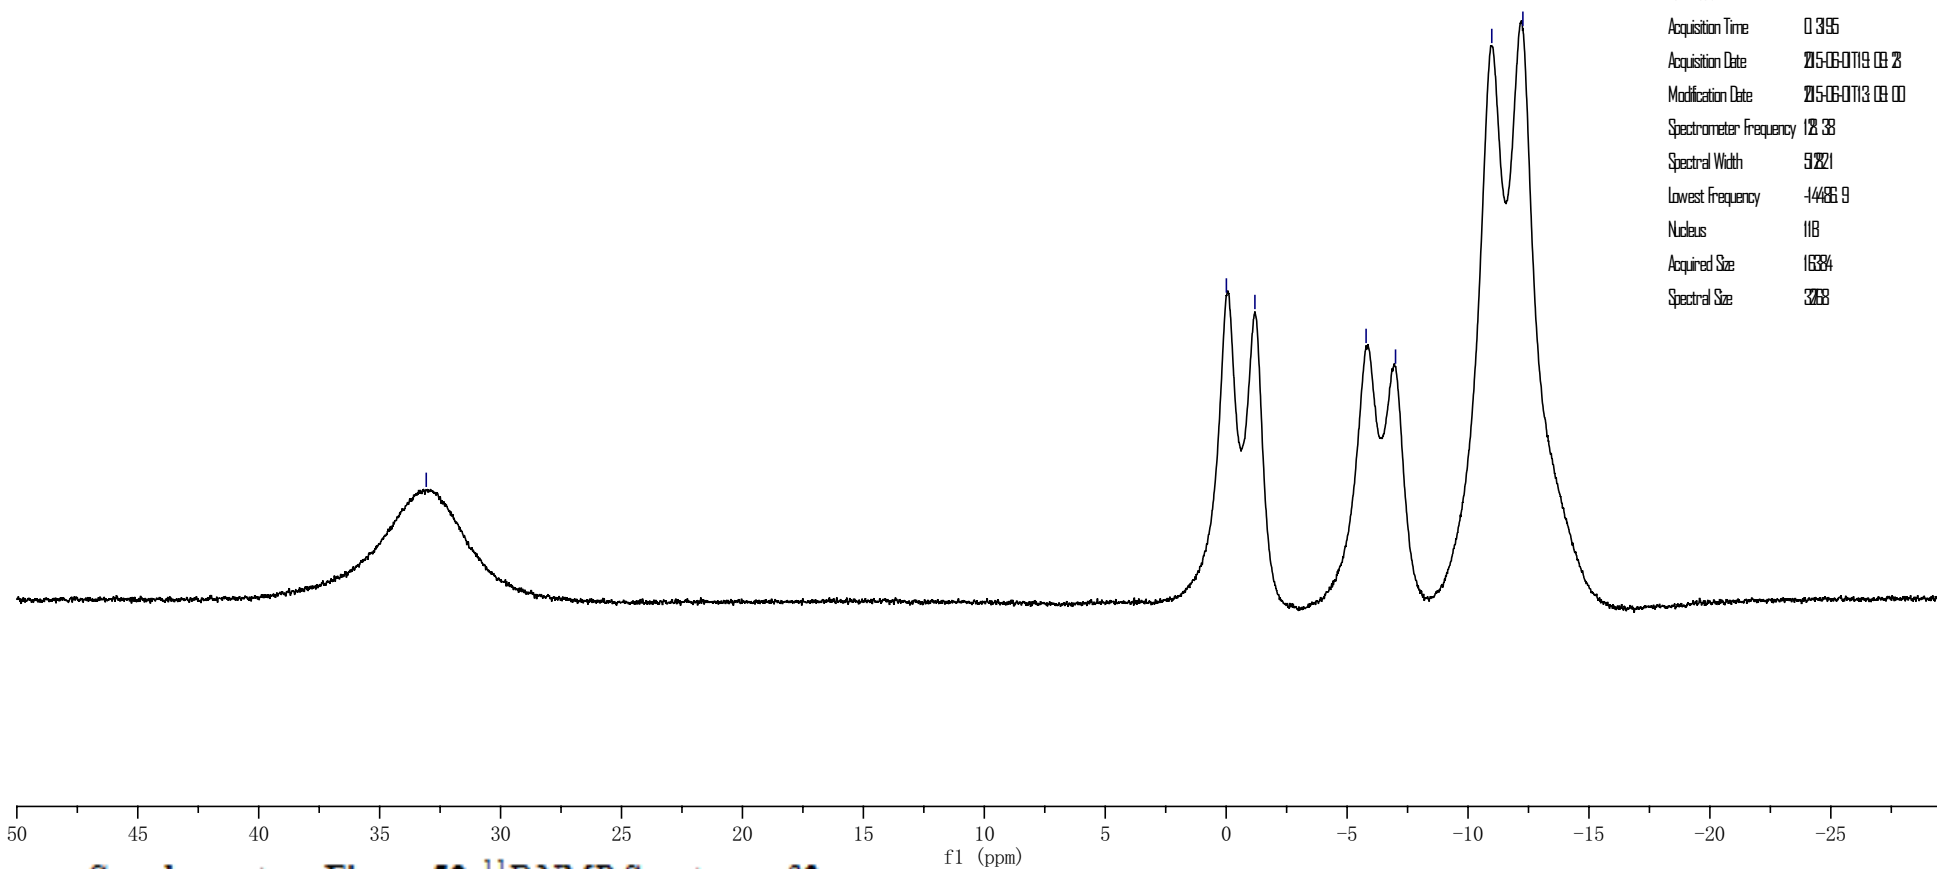

Supplementary Figure 52. <sup>11</sup>B NMR Spectrum of 3a.

crf-3-85-H-CDCl<sub>3</sub>

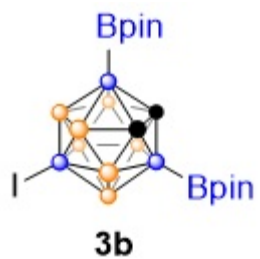

7.260

3.860

3.638

1.265

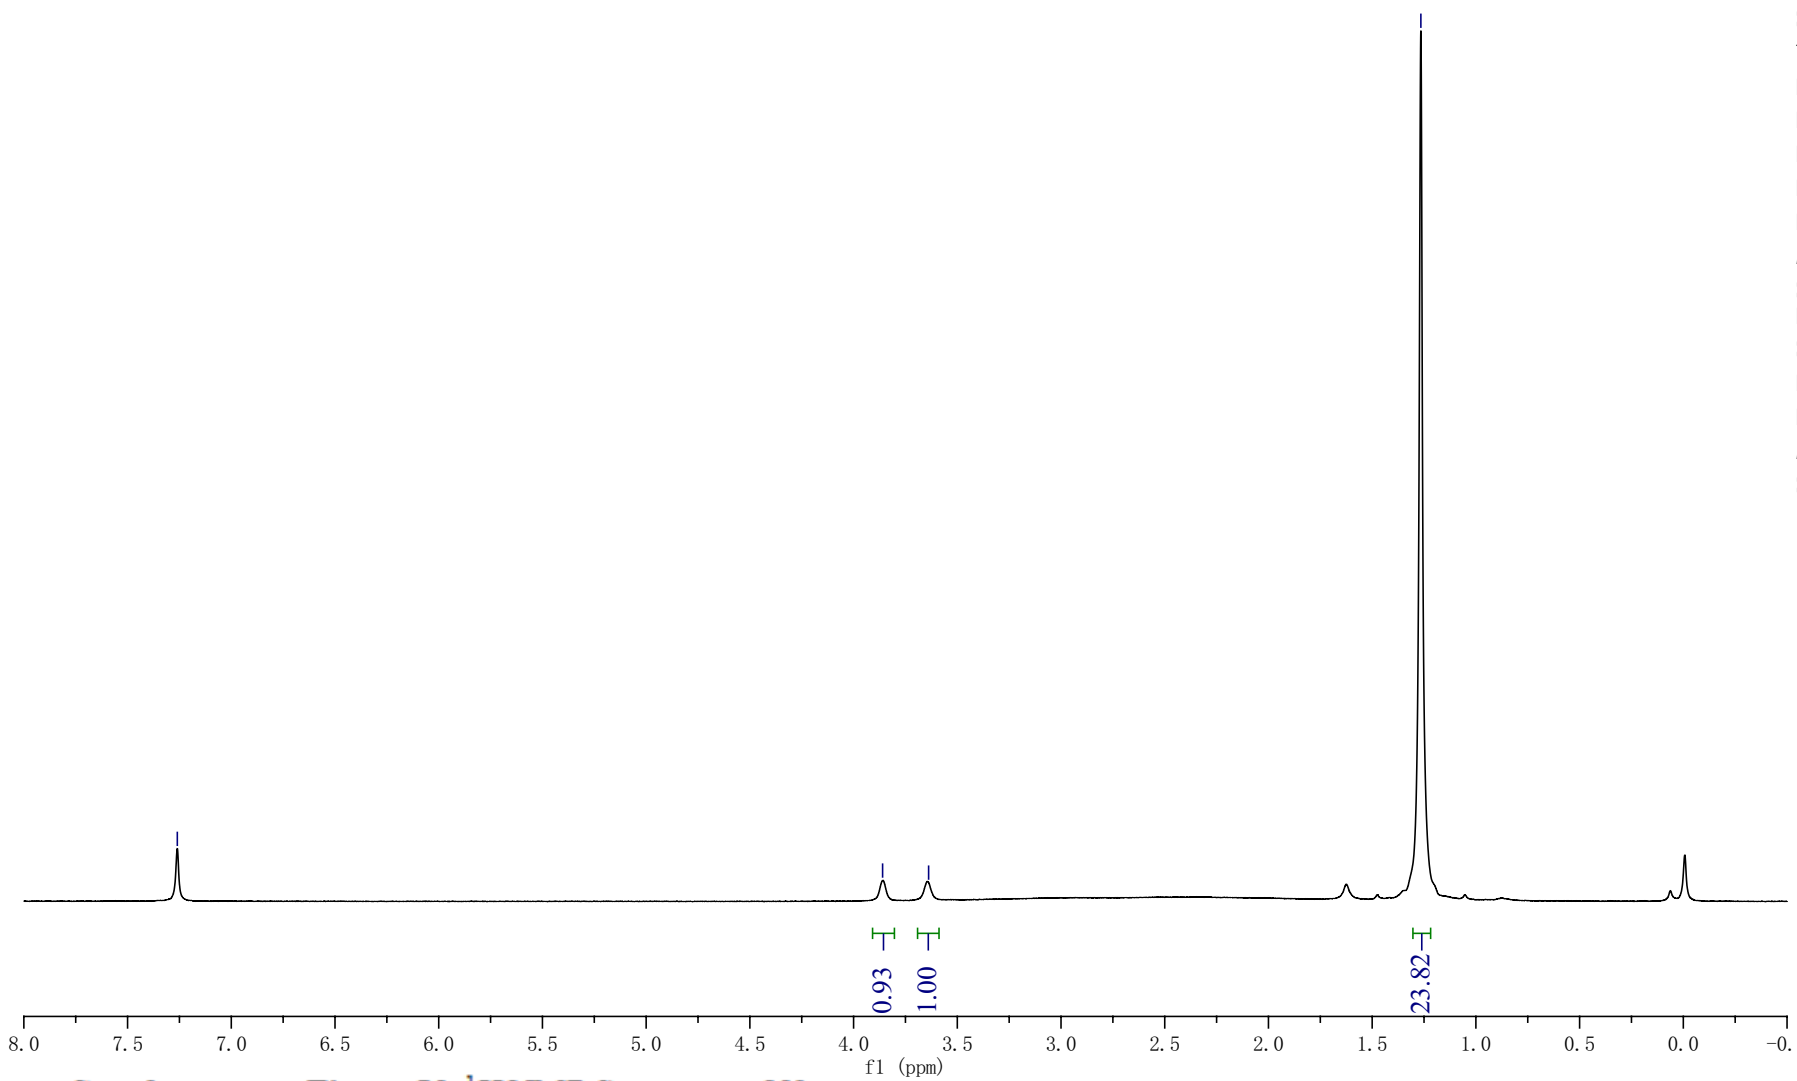

| Parameter              | Value               |
|------------------------|---------------------|
| Title                  | crf3-85-HH          |
| Comment                | STANDARD 1H OBSERVE |
| Origin                 | Varien              |
| Owner                  |                     |
| Site                   |                     |
| Spectrometer           | mercury             |
| Author                 | omc                 |
| Solvent                | CDCl3               |
| Temperature            | 29.0                |
| Pulse Sequence         | sZgD                |
| Number of Scans        | 4                   |
| Receiver Gain          | 30                  |
| Relaxation Delay       | 1.0000              |
| Pulse Width            | 0.0000              |
| Acquisition Date       | 2015-02-11 10:42:54 |
| Spectrometer Frequency | 300.03              |
| Spectral Width         | 5494.5              |
| Lowest Frequency       | -789.4              |
| Nucleus                | 1H                  |
| Acquired Size          | 10376               |
| Spectral Size          | 3268                |

Supplementary Figure 53. <sup>1</sup>H NMR Spectrum of **3b**.

crf-3-85-C-CDCl3

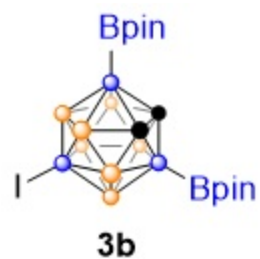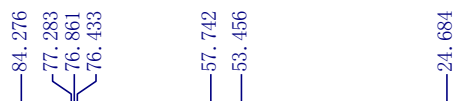

| Parameter              | Value            |
|------------------------|------------------|
| Title                  | crf-3-85-C-001-I |
| Comment                | 13C OBSERVE      |
| Origin                 | Varien           |
| Owner                  |                  |
| Site                   |                  |
| Spectrometer           | mercury          |
| Author                 | omc              |
| Solvent                | CDCl3            |
| Temperature            | 20.0             |
| Pulse Sequence         | zgpg30           |
| Number of Scans        | 48               |
| Receiver Gain          | 34               |
| Relaxation Delay       | 1.0000           |
| Pulse Width            | 0.0000           |
| Acquisition Date       | 2015-02-11 17:53 |
| Spectrometer Frequency | 75.45            |
| Spectral Width         | 1901.4           |
| Lowest Frequency       | -1735.4          |
| Nucleus                | 13C              |
| Acquired Size          | 2817             |
| Spectral Size          | 65536            |

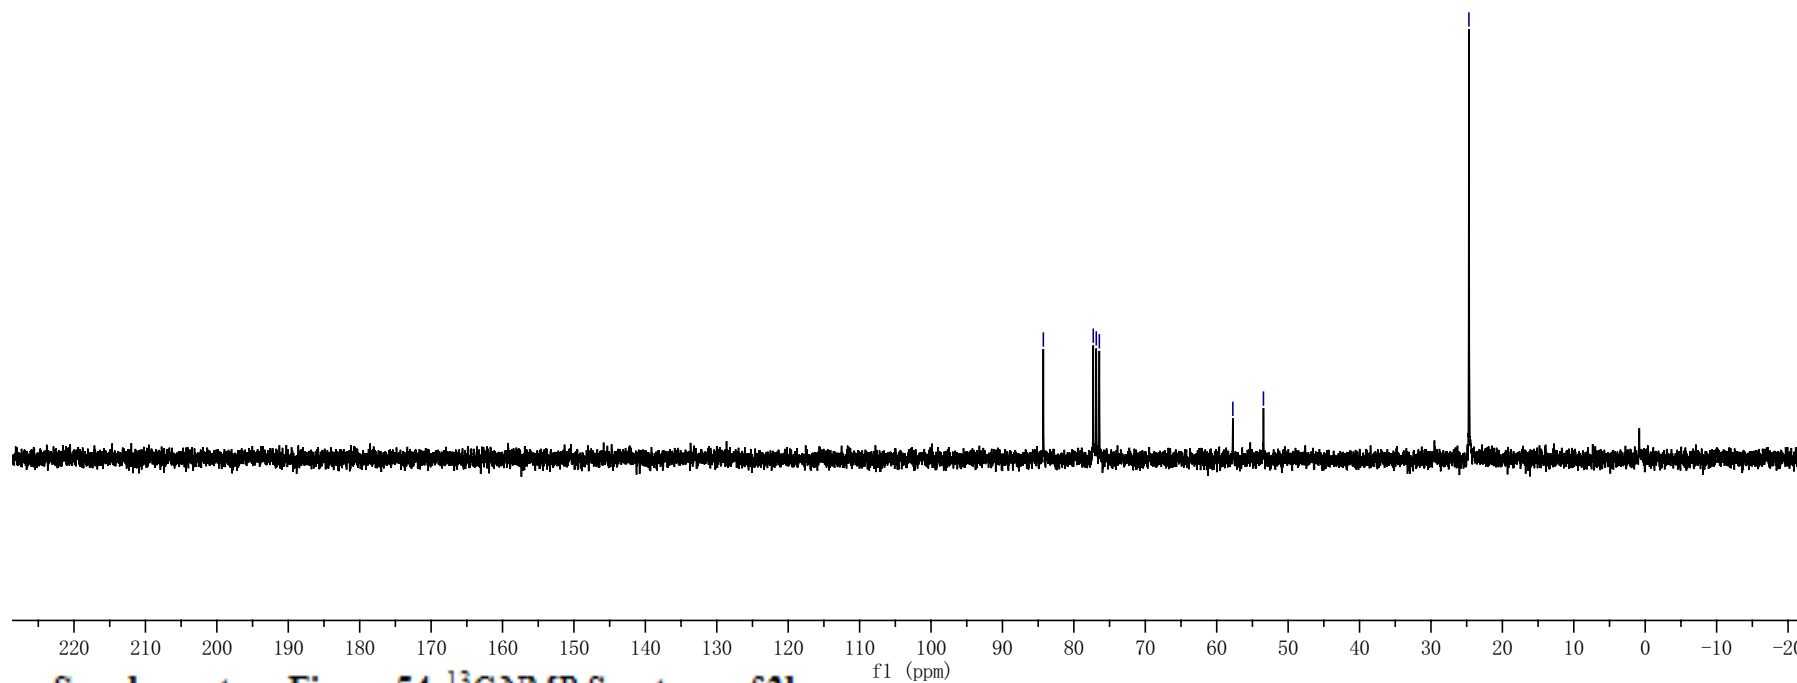

Supplementary Figure 54. <sup>13</sup>C NMR Spectrum of 3b.

crf-3-85-B-decoupling-CDCl<sub>3</sub>

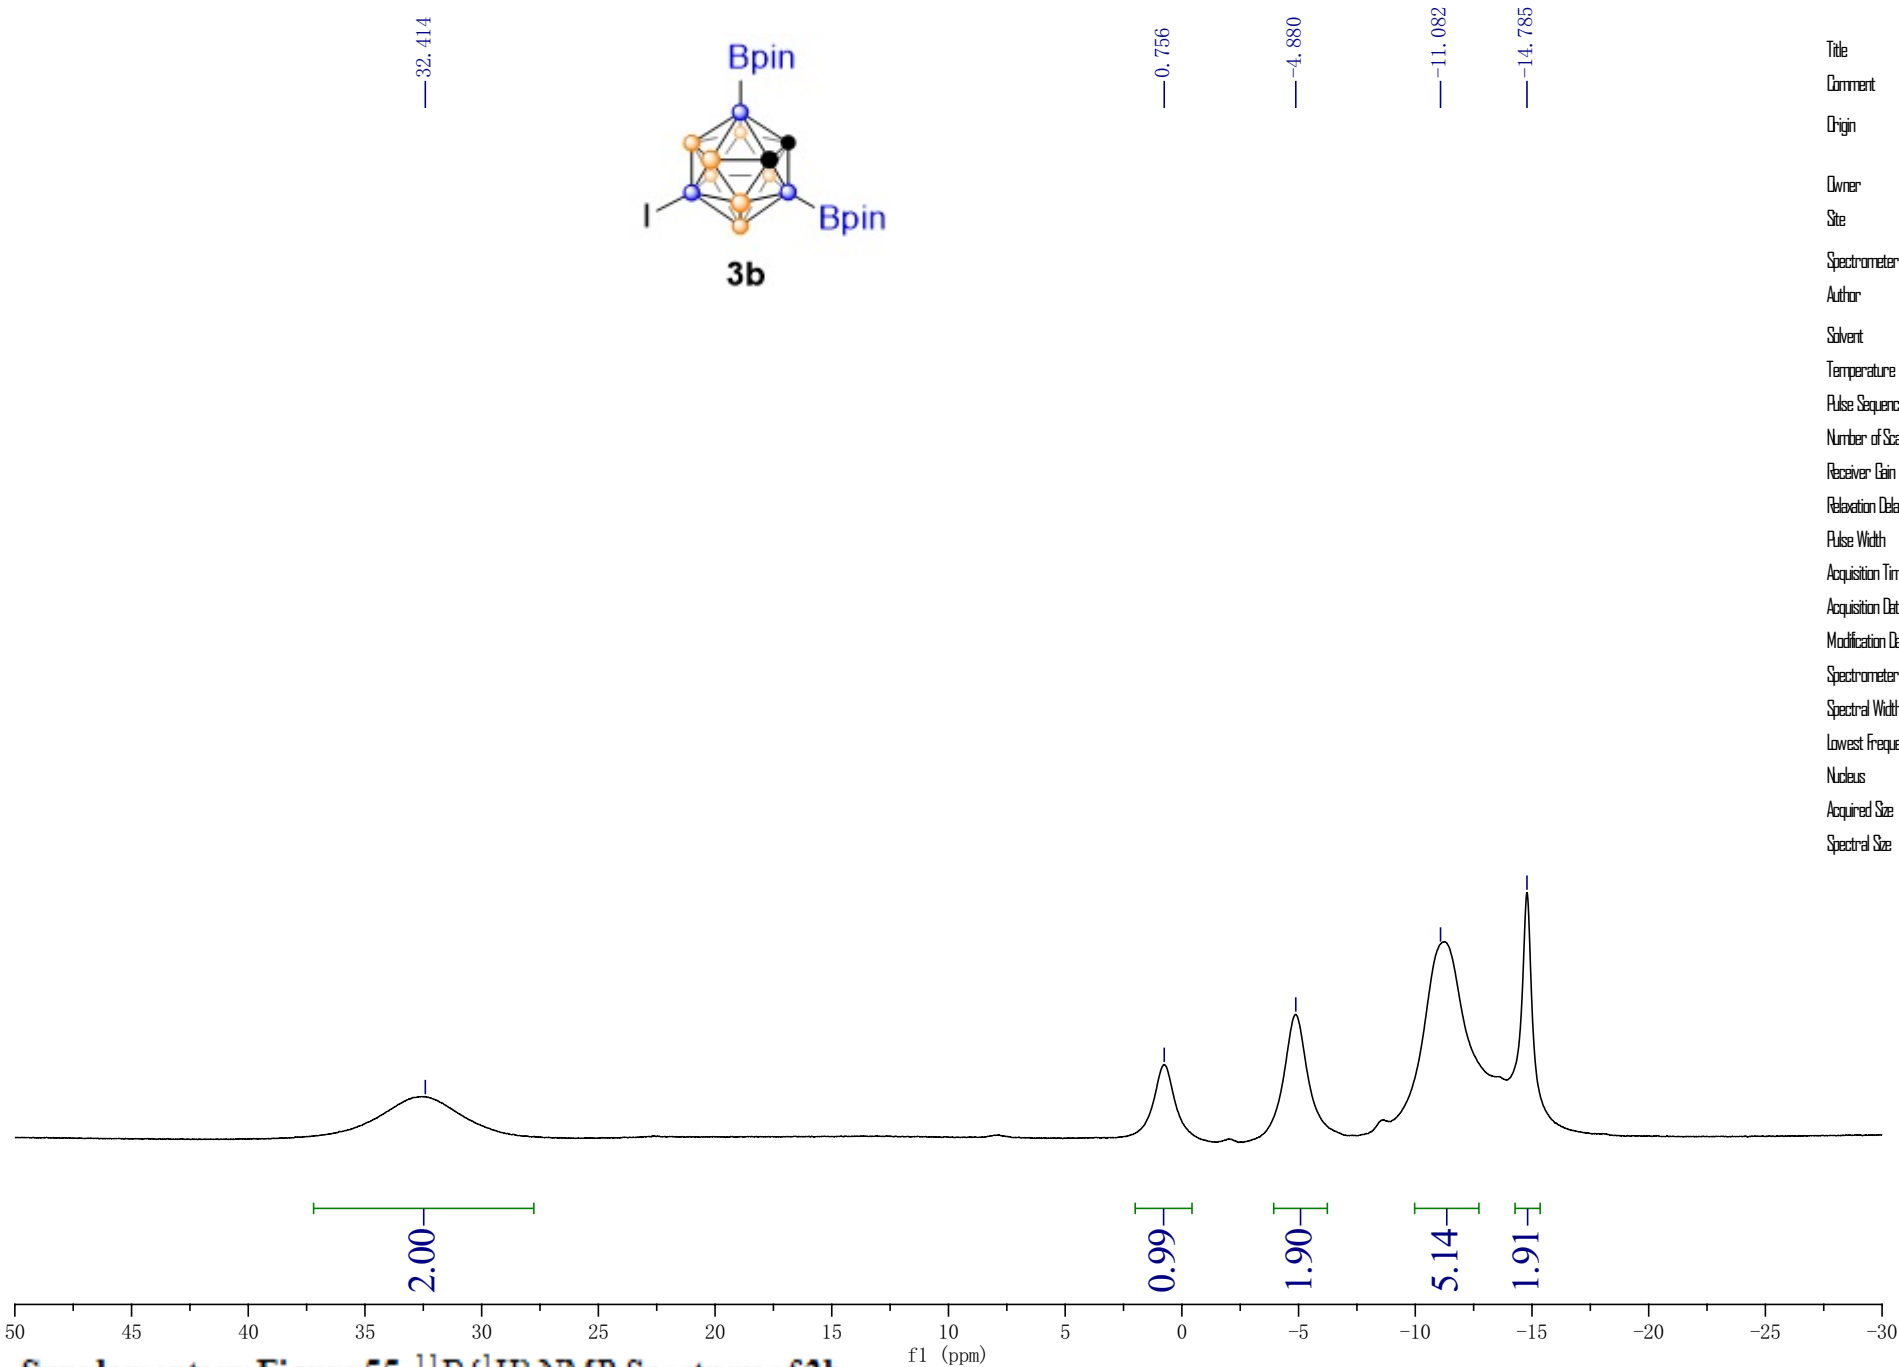

| Parameter              | Value                                                        |
|------------------------|--------------------------------------------------------------|
| Data File Name         | G:/Users/Administrator/Desktop/work/送样NMR/3-85/b-cr-f3-85/td |
| Title                  | 3-85                                                         |
| Comment                |                                                              |
| Origin                 | UNMR Bruker Analytische Messtechnik GmbH                     |
| Owner                  | root                                                         |
| Site                   |                                                              |
| Spectrometer           | dx400                                                        |
| Author                 |                                                              |
| Solvent                | DMSO                                                         |
| Temperature            | 300.0                                                        |
| Pulse Sequence         | aring-1gy                                                    |
| Number of Scans        | 800                                                          |
| Receiver Gain          | 32                                                           |
| Relaxation Delay       | 0.0000                                                       |
| Pulse Width            | 13.4000                                                      |
| Acquisition Time       | 0.3155                                                       |
| Acquisition Date       | 2015-02-11 21:39:13                                          |
| Modification Date      | 2015-02-11 21:39:10                                          |
| Spectrometer Frequency | 128.38                                                       |
| Spectral Width         | 51821                                                        |
| Lowest Frequency       | -16480.9                                                     |
| Nucleus                | 11B                                                          |
| Acquired Size          | 16384                                                        |
| Spectral Size          | 3288                                                         |

Supplementary Figure 55. <sup>11</sup>B{<sup>1</sup>H} NMR Spectrum of **3b**.

crf-3-85-B-coupling-CDCl<sub>3</sub>

32.666

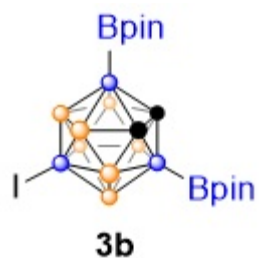

-1.372

-0.249

-4.276

-5.487

-11.260

-14.769

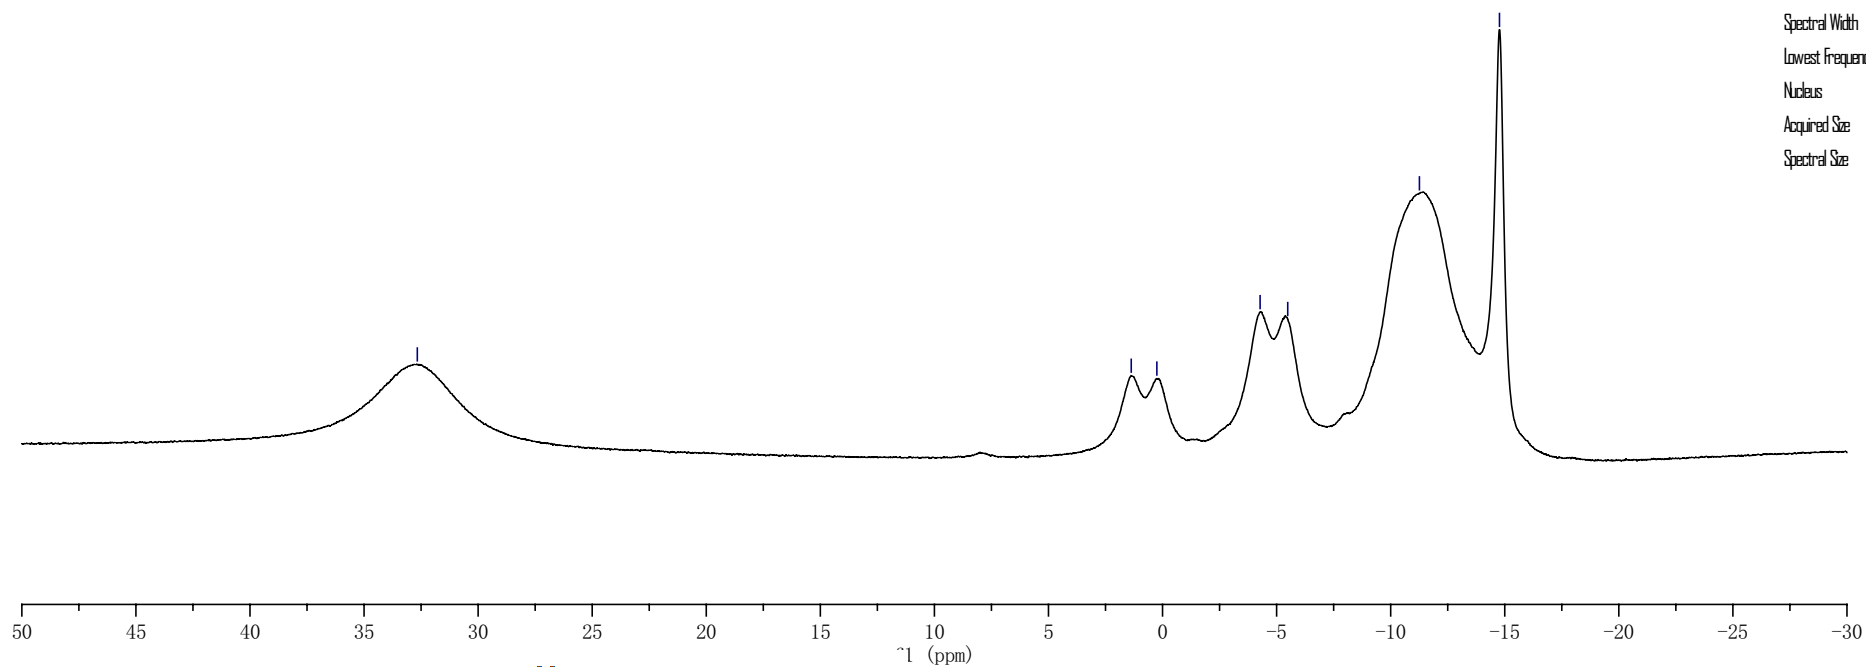

| Parameter              | Value                                                                                  |
|------------------------|----------------------------------------------------------------------------------------|
| Data File Name         | C:/Users/Administrator/Desktop/work/送样NMR/borabatom/3-85/b-cr3-85-withoutdecoupling/1d |
| Title                  | 3-85                                                                                   |
| Comment                |                                                                                        |
| Origin                 | UNMR Bruker Analytische Messtechnik GmbH                                               |
| Owner                  | root                                                                                   |
| Site                   |                                                                                        |
| Spectrometer           | dx400                                                                                  |
| Author                 |                                                                                        |
| Solvent                | DMSO                                                                                   |
| Temperature            | 300.0                                                                                  |
| Pulse Sequence         | aring.ty                                                                               |
| Number of Scans        | 800                                                                                    |
| Receiver Gain          | 32                                                                                     |
| Relaxation Delay       | 0.0000                                                                                 |
| Pulse Width            | 13.4000                                                                                |
| Acquisition Time       | 0.395                                                                                  |
| Acquisition Date       | 2015-02-17 20:45:08                                                                    |
| Modification Date      | 2015-02-17 13:47:00                                                                    |
| Spectrometer Frequency | 128.38                                                                                 |
| Spectral Width         | 51221                                                                                  |
| Lowest Frequency       | -16480.9                                                                               |
| Nucleus                | 11B                                                                                    |
| Acquired Size          | 16384                                                                                  |
| Spectral Size          | 3268                                                                                   |

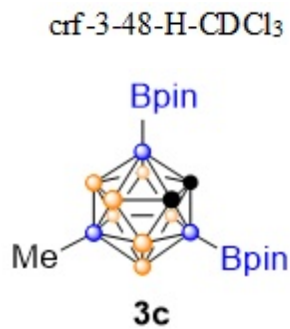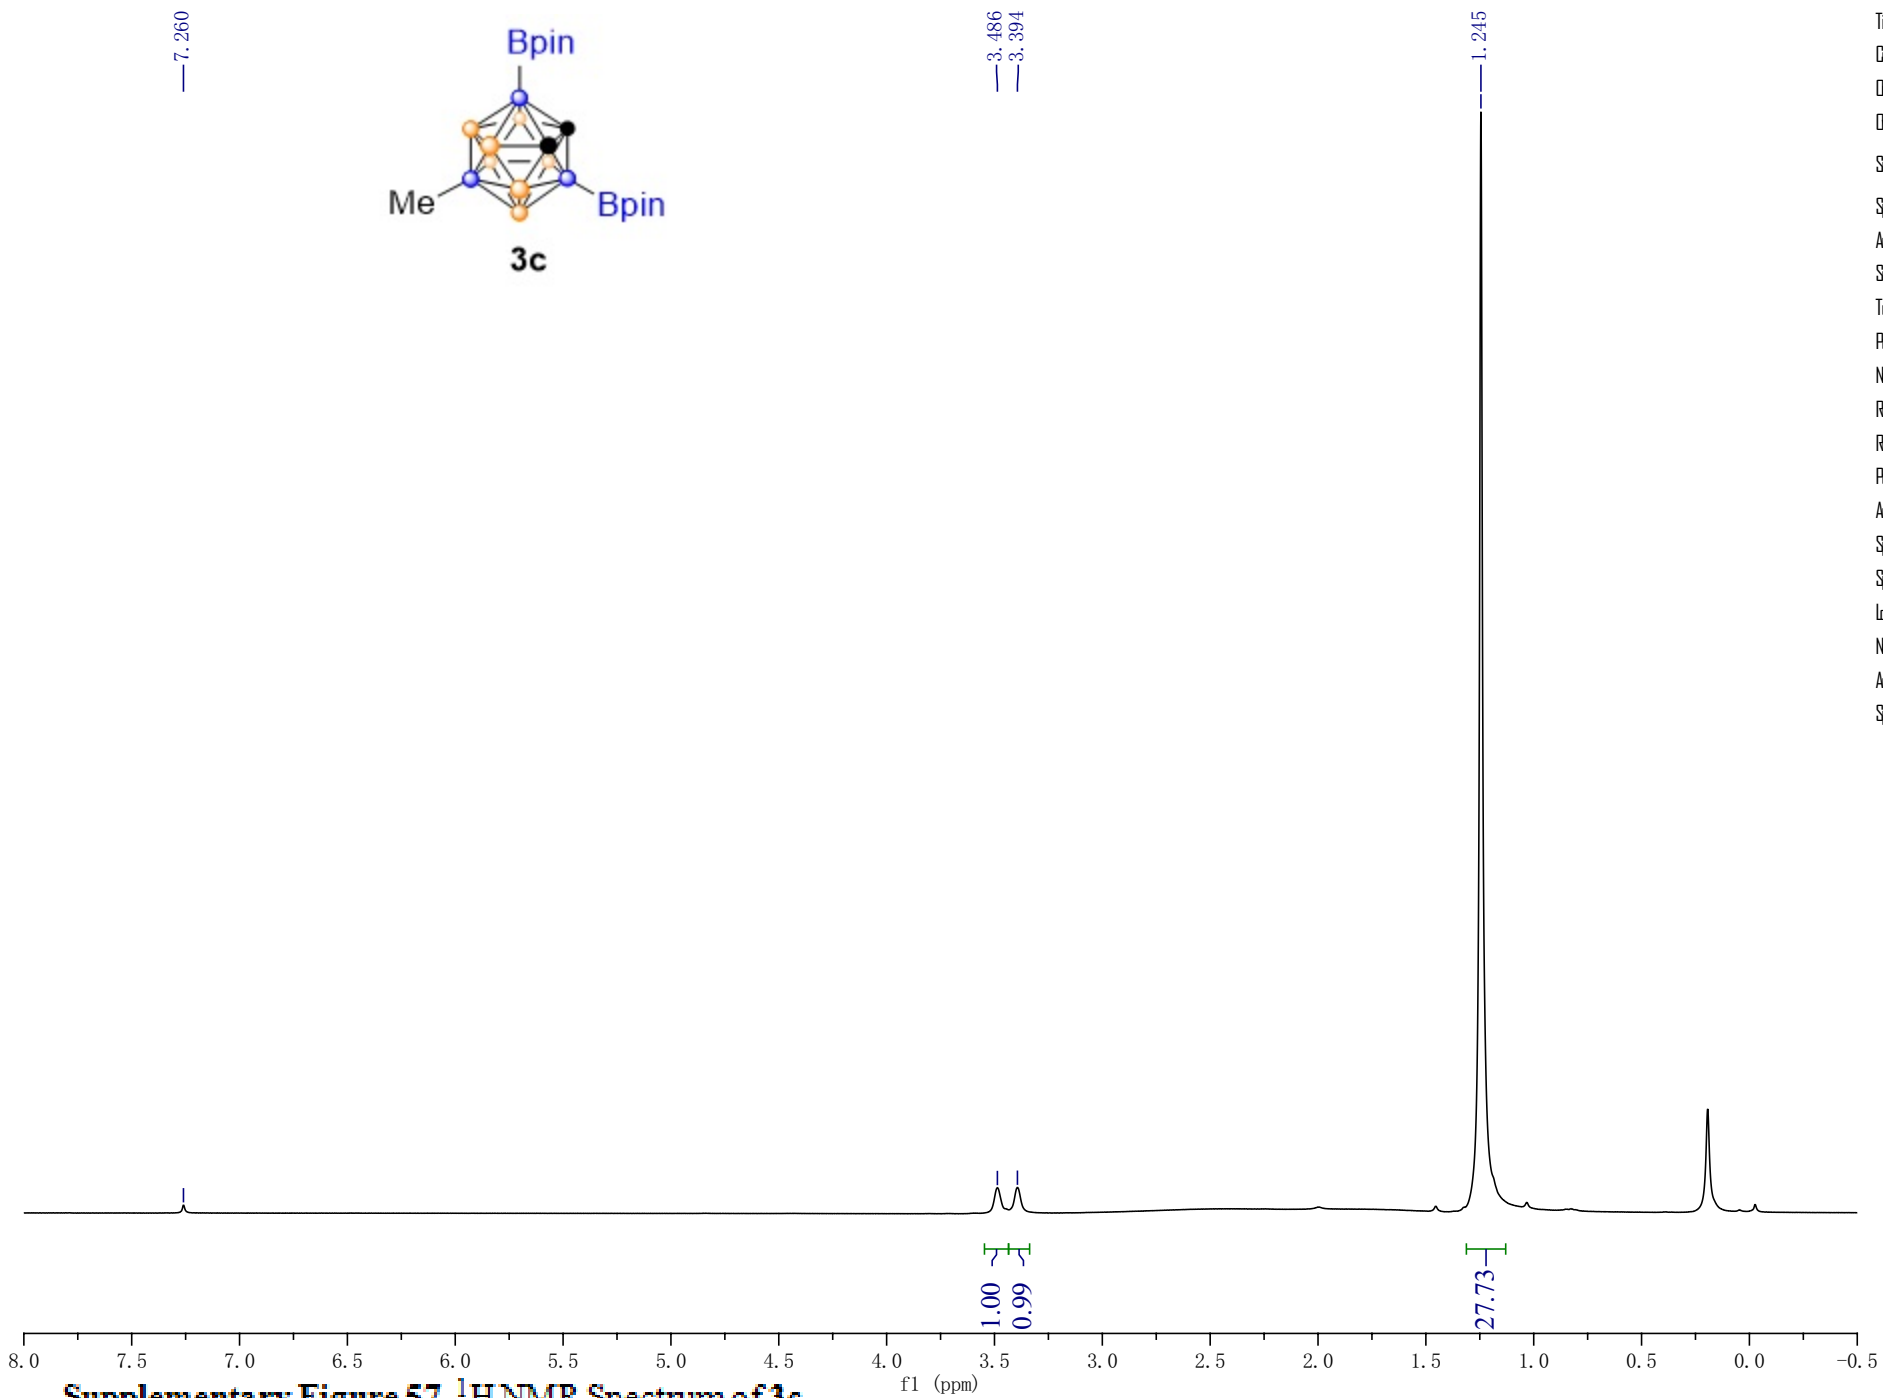

| Parameter              | Value               |
|------------------------|---------------------|
| Title                  | crf-3-48H           |
| Comment                | STANDARD 1H OBSERVE |
| Origin                 | Varian              |
| Owner                  |                     |
| Site                   |                     |
| Spectrometer           | mercury             |
| Author                 | omc                 |
| Solvent                | CDCl <sub>3</sub>   |
| Temperature            | 28.0                |
| Pulse Sequence         | zgpg30              |
| Number of Scans        | 12                  |
| Receiver Gain          | 10                  |
| Relaxation Delay       | 1.0000              |
| Pulse Width            | 0.0000              |
| Acquisition Date       | 2015-01-17 17:03:49 |
| Spectrometer Frequency | 300.03              |
| Spectral Width         | 5494.5              |
| Lowest Frequency       | -708.8              |
| Nucleus                | <sup>1</sup> H      |
| Acquired Size          | 10895               |
| Spectral Size          | 3268                |

Supplementary Figure 57. <sup>1</sup>H NMR Spectrum of 3c.

crf-3-48-C-CDCl<sub>3</sub>

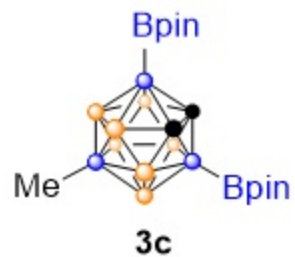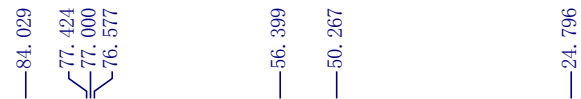

| Parameter                 | Value              |
|---------------------------|--------------------|
| 1 Title                   | crf-3-48-C         |
| 2 Comment                 | 13C OBSERVE        |
| 3 Origin                  | Varian             |
| 4 Owner                   |                    |
| 5 Site                    |                    |
| 6 Spectrometer            | mercury            |
| 7 Author                  | omc                |
| 8 Solvent                 | CDCl <sub>3</sub>  |
| 9 Temperature             | 29.0               |
| 10 Pulse Sequence         | s2pul              |
| 11 Number of Scans        | 124                |
| 12 Receiver Gain          | 34                 |
| 13 Relaxation Delay       | 1.0000             |
| 14 Pulse Width            | 0.0000             |
| 15 Acquisition Date       | 2015-01-17T17:09:5 |
| 16 Spectrometer Frequency | 75.45              |
| 17 Spectral Width         | 18797.0            |
| 18 Lowest Frequency       | -1649.4            |
| 19 Nucleus                | 13C                |
| 20 Acquired Size          | 30075              |
| 21 Spectral Size          | 65536              |

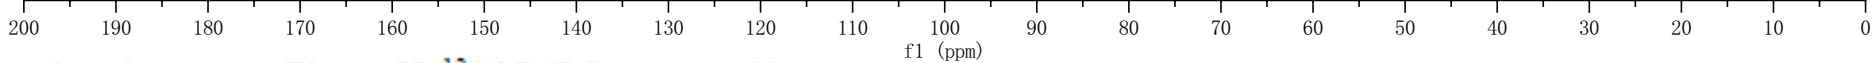

Supplementary Figure 58. <sup>13</sup>C NMR Spectrum of 3c.

crf-3-48-B-decoupling-CDCl<sub>3</sub>

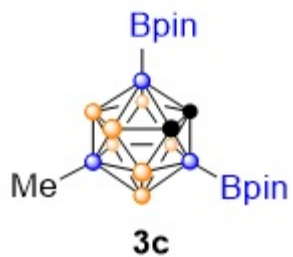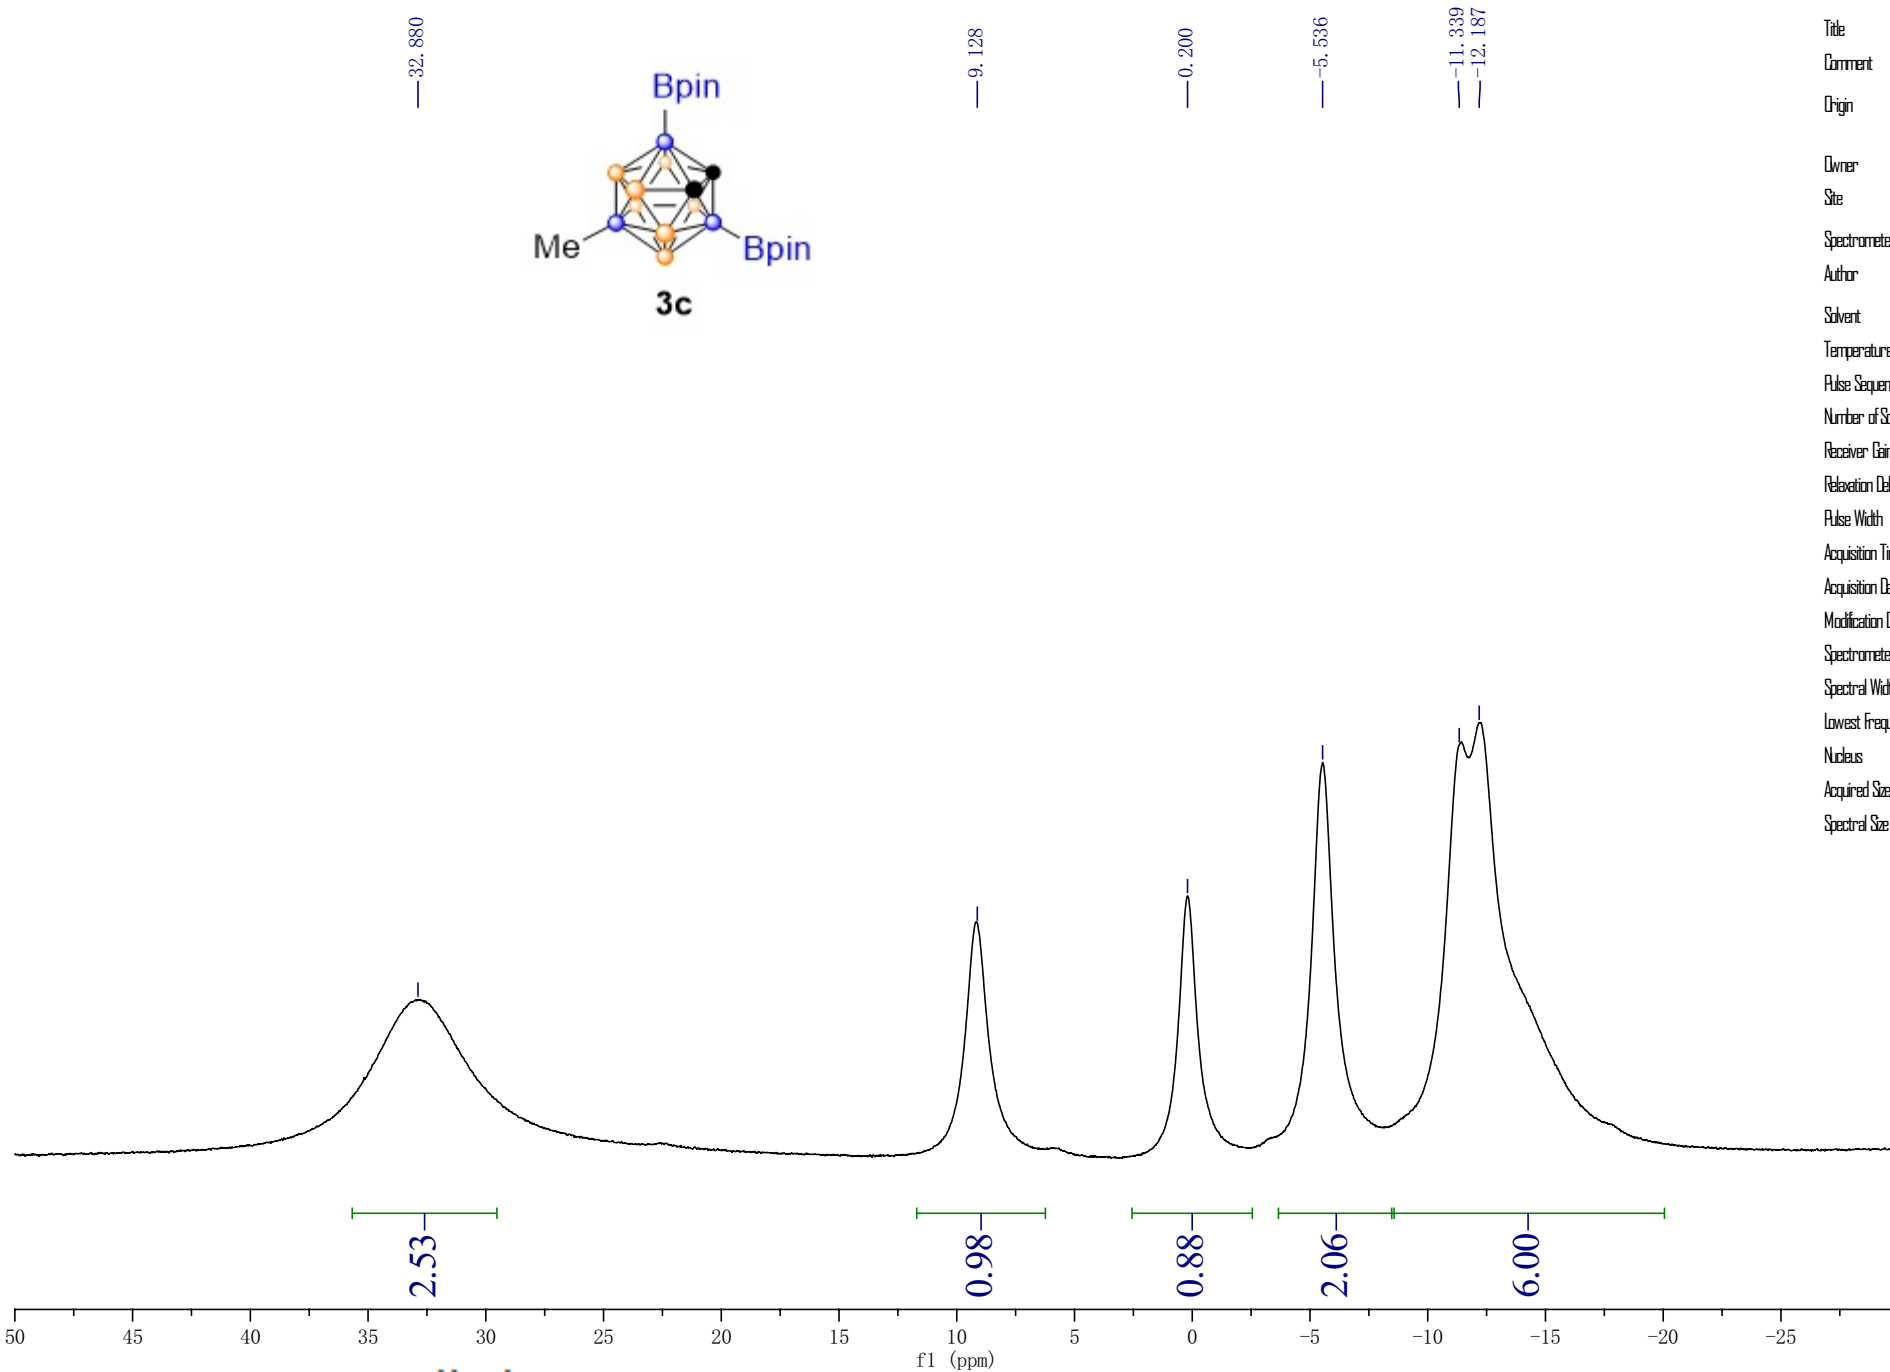

| Parameter              | Value                                            |
|------------------------|--------------------------------------------------|
| Data File Name         | C:/Users/Administrator/Desktop/b-crf-3-48 (1)/f1 |
| Title                  | Desktop                                          |
| Comment                |                                                  |
| Origin                 | UNMR Bruker Analytische Messtechnik GmbH         |
| Owner                  | root                                             |
| Site                   |                                                  |
| Spectrometer           | dx400                                            |
| Author                 |                                                  |
| Solvent                | DMSO                                             |
| Temperature            | 300.0                                            |
| Pulse Sequence         | aning.tg                                         |
| Number of Scans        | 364                                              |
| Receiver Gain          | 32                                               |
| Relaxation Delay       | 0.0000                                           |
| Pulse Width            | 13.4000                                          |
| Acquisition Time       | 0.395                                            |
| Acquisition Date       | 2015-01-27 19:00:31                              |
| Modification Date      | 2015-01-27 12:00:00                              |
| Spectrometer Frequency | 128.38                                           |
| Spectral Width         | 91821                                            |
| Lowest Frequency       | -17920.9                                         |
| Nucleus                | 11B                                              |
| Acquired Size          | 16384                                            |
| Spectral Size          | 3068                                             |

Supplementary Figure 59. <sup>11</sup>B {<sup>1</sup>H} NMR Spectrum of **3c**.



crf-3-48-B-coupling-CDCl<sub>3</sub>

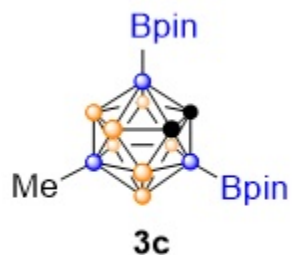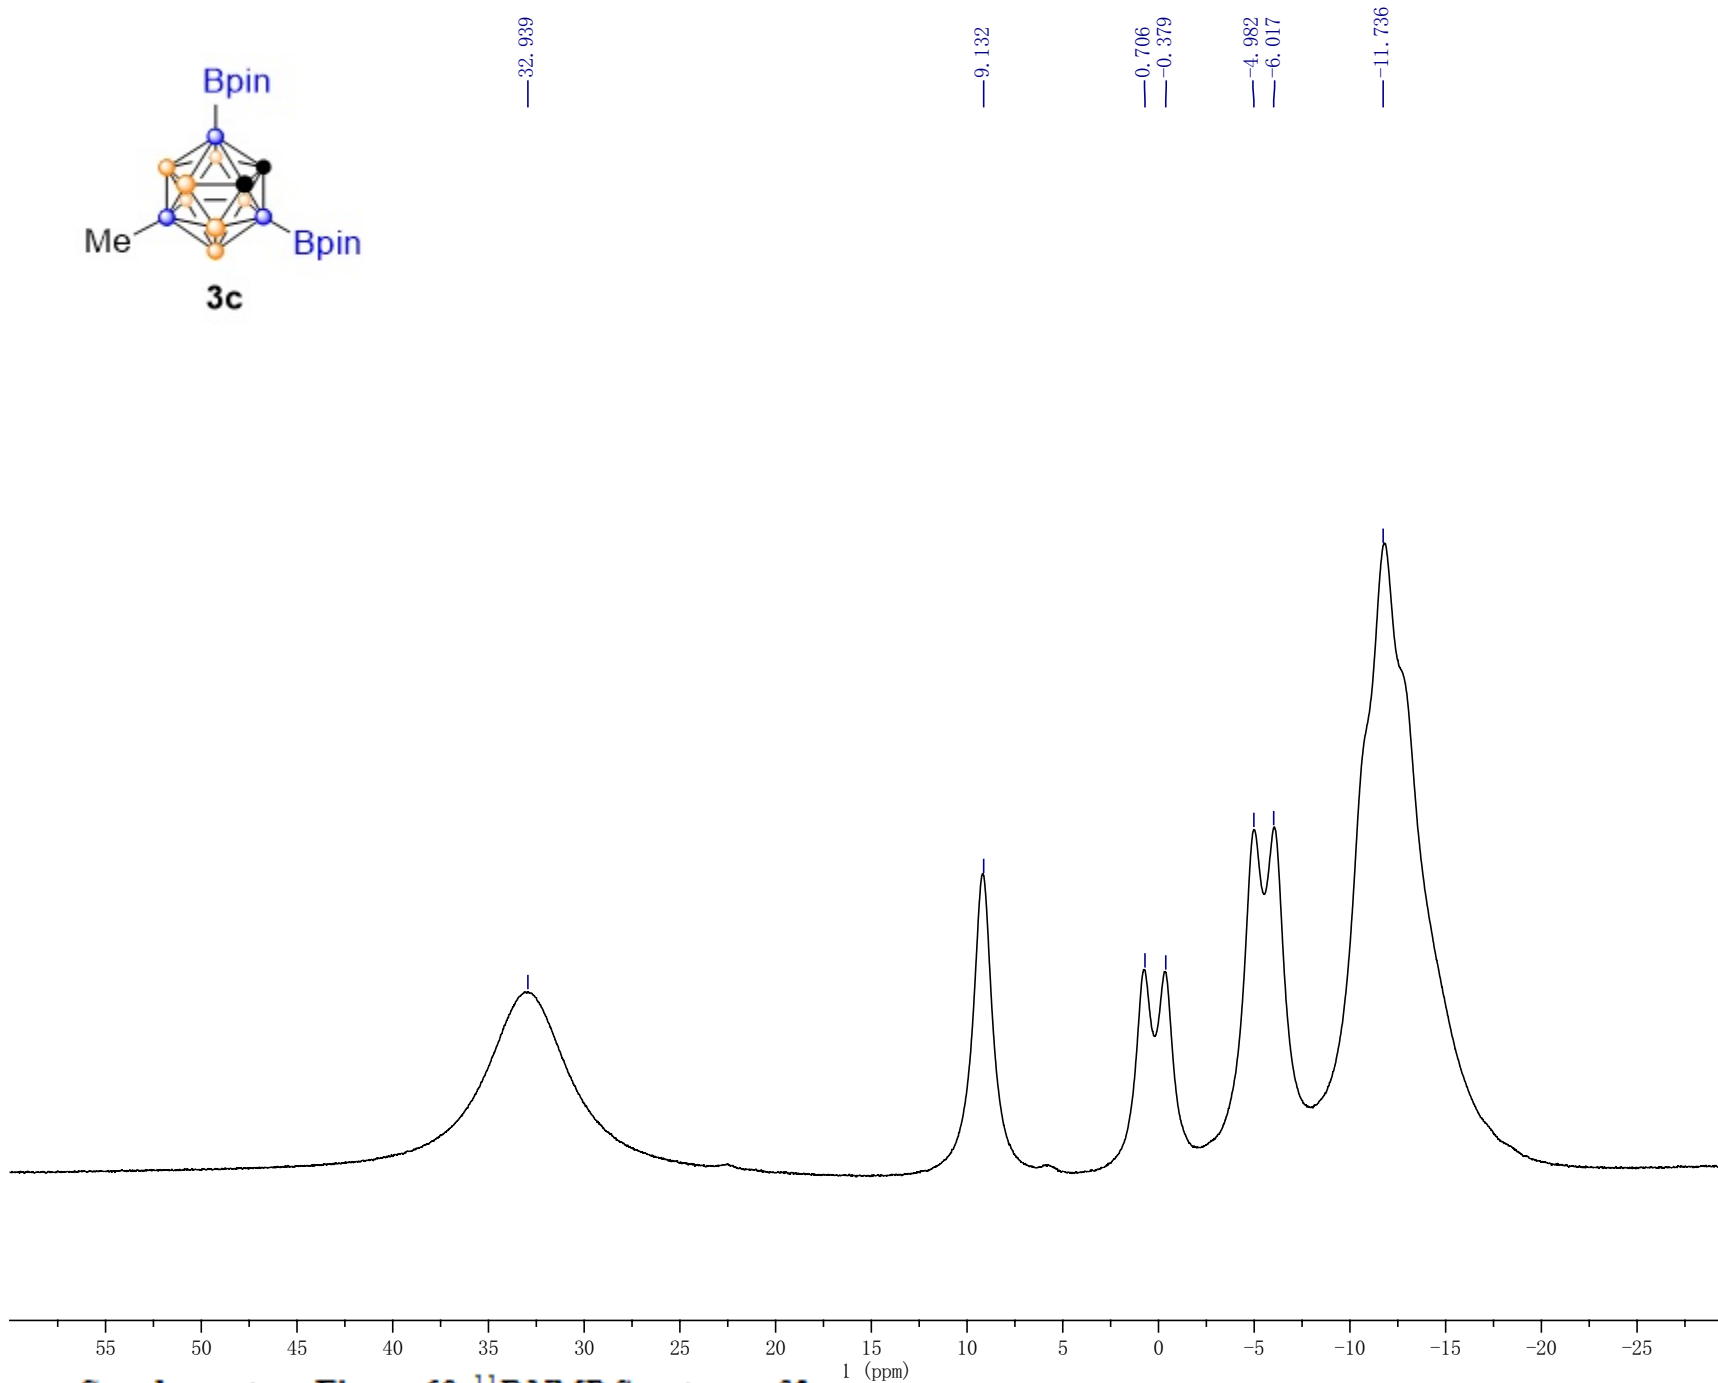

| Parameter              | Value                                                           |
|------------------------|-----------------------------------------------------------------|
| Data file Name         | C:/Users/Administrator/Desktop/b-crf-3-48-withoutdecoupling/fid |
| Title                  | Desktop                                                         |
| Comment                |                                                                 |
| Origin                 | UNMR Bruker Analytische Messtechnik GmbH                        |
| Owner                  | root                                                            |
| Site                   |                                                                 |
| Spectrometer           | dr400                                                           |
| Author                 |                                                                 |
| Solvent                | DMSO                                                            |
| Temperature            | 300.0                                                           |
| Pulse Sequence         | aring_tgy                                                       |
| Number of Scans        | 540                                                             |
| Receiver Gain          | 32                                                              |
| Relaxation Delay       | 0.0000                                                          |
| Pulse Width            | 13.4000                                                         |
| Acquisition Time       | 0.395                                                           |
| Acquisition Date       | 2015-01-21 23:37                                                |
| Modification Date      | 2015-01-21 15:34:00                                             |
| Spectrometer Frequency | 128.38                                                          |
| Spectral Width         | 51821                                                           |
| Lowest Frequency       | -16526.9                                                        |
| Nucleus                | 11B                                                             |
| Acquired Size          | 16384                                                           |
| Spectral Size          | 3268                                                            |

Supplementary Figure 60. <sup>11</sup>B NMR Spectrum of **3c**.

crf-3-72-H-CDCl<sub>3</sub>

7.260  
7.207  
7.185  
7.162  
7.047  
7.024

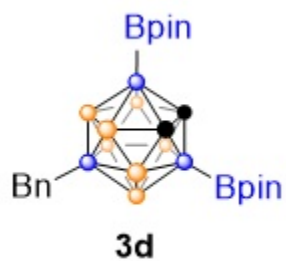

3.468  
3.450

2.220

1.262

| Parameter              | Value               |
|------------------------|---------------------|
| Title                  | crf-3-72H           |
| Comment                | STANDARD OBSERVE    |
| Origin                 | Varien              |
| Owner                  |                     |
| Site                   |                     |
| Spectrometer           | mercury             |
| Author                 | onc                 |
| Solvent                | CDCl <sub>3</sub>   |
| Temperature            | 20.0                |
| Pulse Sequence         | sgpd                |
| Number of Scans        | 20                  |
| Receiver Gain          | 10                  |
| Relaxation Delay       | 1.0000              |
| Pulse Width            | 0.0000              |
| Acquisition Date       | 2015-02-27 11:25:03 |
| Spectrometer Frequency | 300.03              |
| Spectral Width         | 5494.5              |
| Lowest Frequency       | -708.8              |
| Nucleus                | <sup>1</sup> H      |
| Acquired Size          | 10376               |
| Spectral Size          | 3268                |

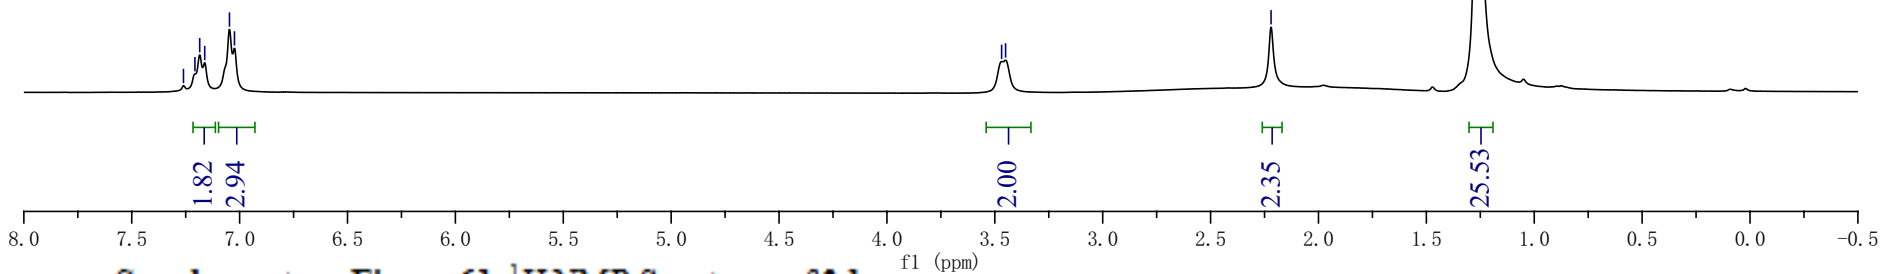

Supplementary Figure 61. <sup>1</sup>H NMR Spectrum of 3d.

crf-3-72-C-CDCl<sub>3</sub>

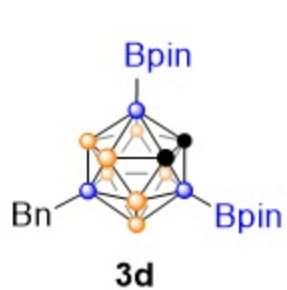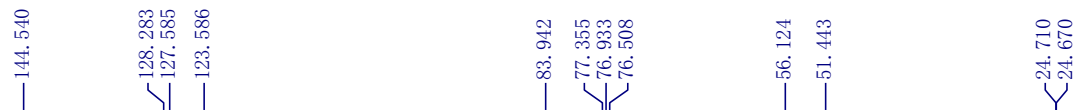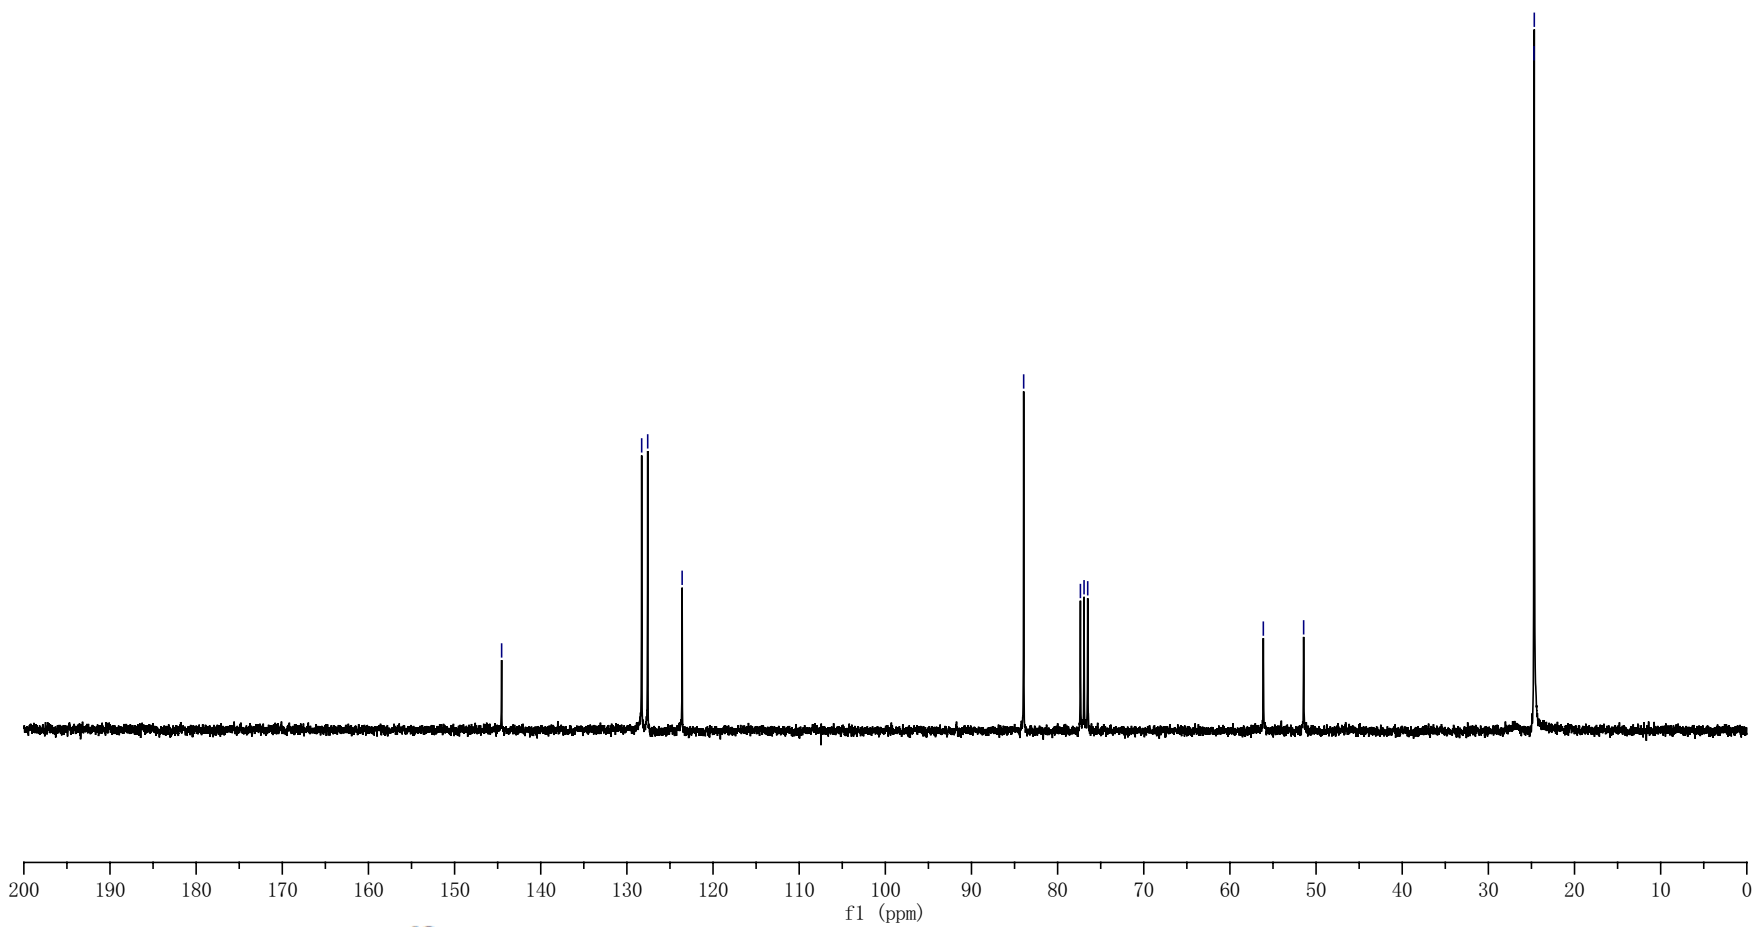

| Parameter              | Value                   |
|------------------------|-------------------------|
| Title                  | crf-3-72-C              |
| Comment                | <sup>13</sup> C OBSERVE |
| Origin                 | Varian                  |
| Owner                  |                         |
| Site                   |                         |
| Spectrometer           | mercury                 |
| Author                 | omc                     |
| Solvent                | CDCl <sub>3</sub>       |
| Temperature            | 28.0                    |
| Pulse Sequence         | sgpd                    |
| Number of Scans        | 132                     |
| Receiver Gain          | 34                      |
| Relaxation Delay       | 1.0000                  |
| Pulse Width            | 0.0000                  |
| Acquisition Date       | 2015-02-27 11:28:2      |
| Spectrometer Frequency | 75.45                   |
| Spectral Width         | 18387.0                 |
| Lowest Frequency       | -16331.2                |
| Nucleus                | <sup>13</sup> C         |
| Acquired Size          | 2895                    |
| Spectral Size          | 65536                   |

Supplementary Figure 62. <sup>13</sup>C NMR Spectrum of 3d.

crf-3-72-B-decoupling-CDCl<sub>3</sub>

—33.156

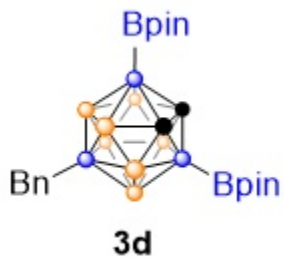

—9.987

—-0.254

—-5.898

—-11.831

| Parameter              | Value                                         |
|------------------------|-----------------------------------------------|
| Data File Name         | G:/Users/Administrator/Desktop/b-crf-3-72.fid |
| Title                  | Desktop                                       |
| Comment                |                                               |
| Origin                 | UNMR Bruker Analytische Messtechnik GmbH      |
| Owner                  | root                                          |
| Site                   |                                               |
| Spectrometer           | dx400                                         |
| Author                 |                                               |
| Solvent                | DMSO                                          |
| Temperature            | 300.0                                         |
| Pulse Sequence         | aring.tgy                                     |
| Number of Scans        | 126                                           |
| Receiver Gain          | 32                                            |
| Relaxation Delay       | 0.0000                                        |
| Pulse Width            | 13.4000                                       |
| Acquisition Time       | 0.3195                                        |
| Acquisition Date       | 215-02/07/15 12:40                            |
| Modification Date      | 215-02/04/08 30:00                            |
| Spectrometer Frequency | 128.38                                        |
| Spectral Width         | 5.2821                                        |
| Lowest Frequency       | -18555.1                                      |
| Nucleus                | <sup>11</sup> B                               |
| Acquired Size          | 16384                                         |
| Spectral Size          | 3268                                          |

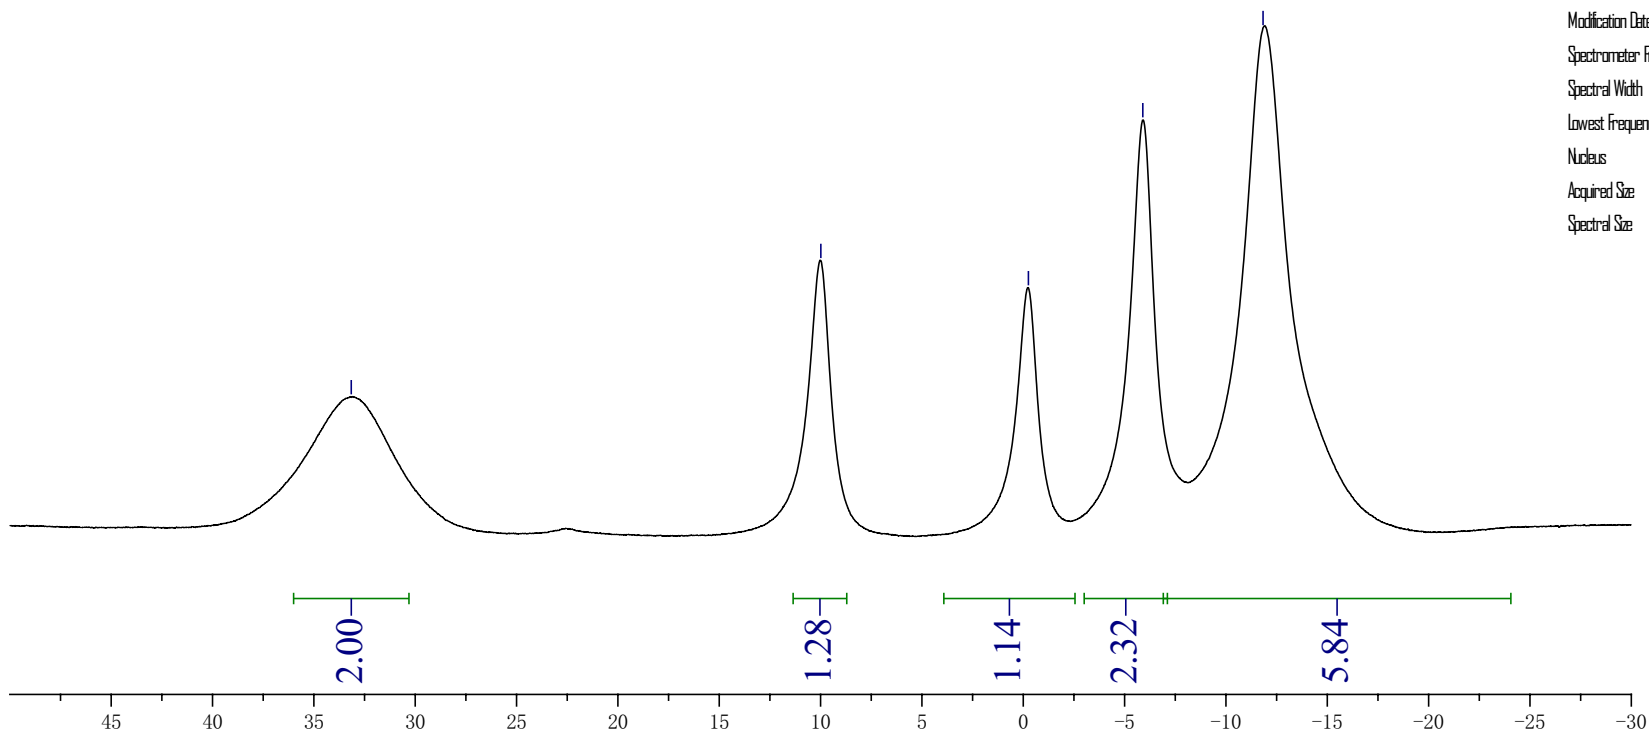

Supplementary Figure 63. <sup>11</sup>B{<sup>1</sup>H} NMR Spectrum of **3d**.

crf-3-72-B-coupling-CDCl<sub>3</sub>

33.407

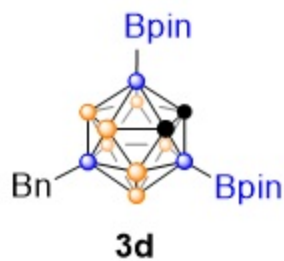

10.063

0.237  
-0.717

-5.380  
-6.272

-11.641

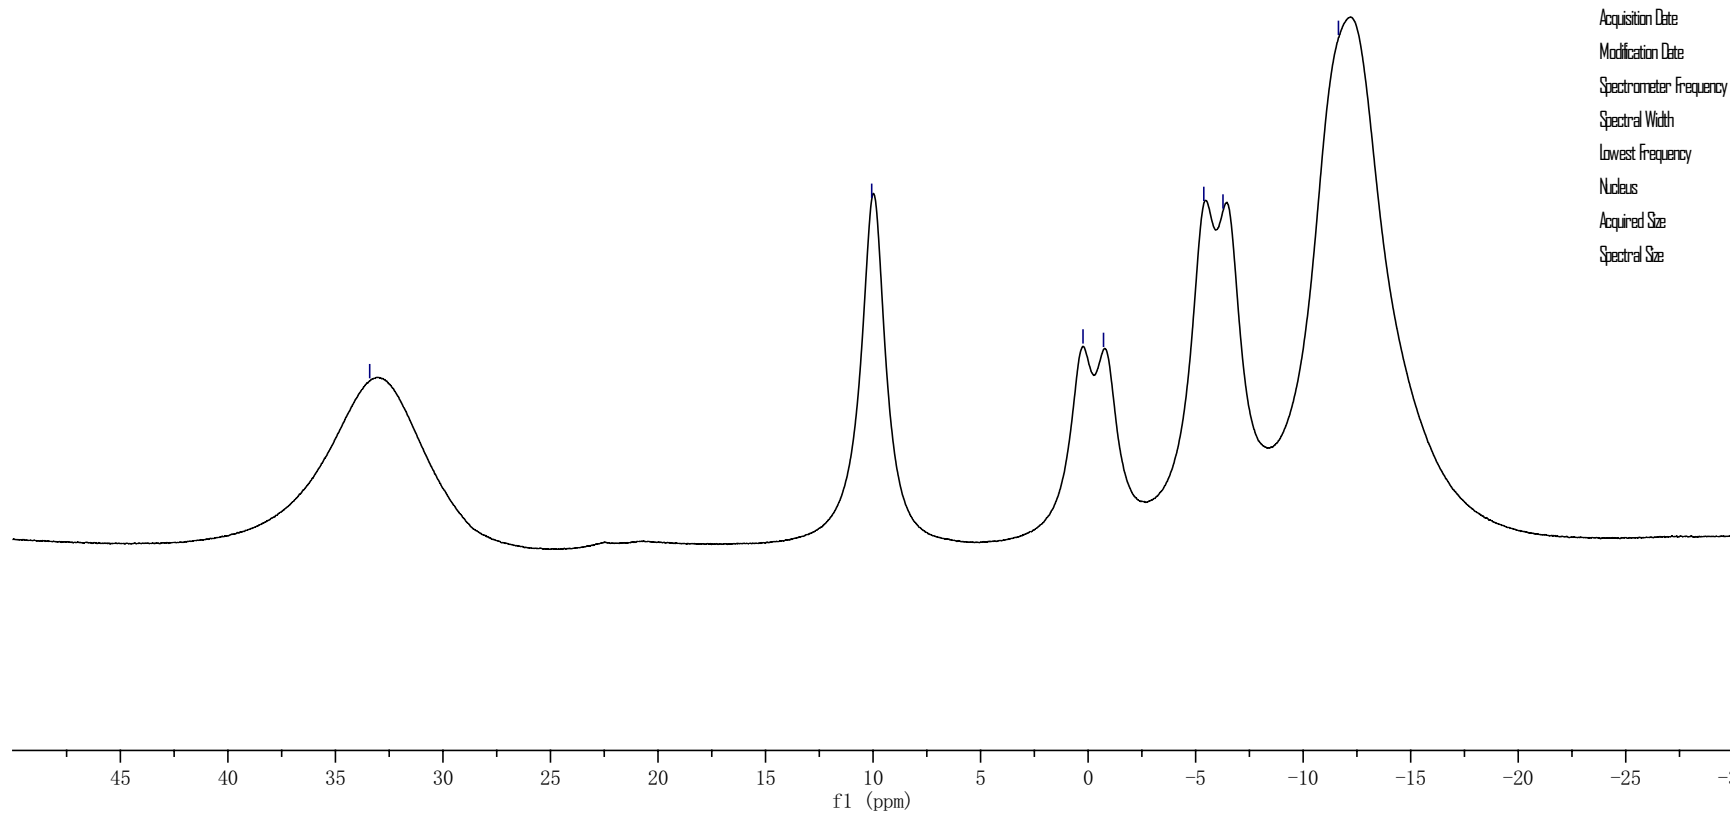

| Parameter              | Value                                                          |
|------------------------|----------------------------------------------------------------|
| Data File Name         | C:/Users/Administrator/Desktop/b-cr-f3-72withoutdecoupling/fid |
| Title                  | Desktop                                                        |
| Comment                |                                                                |
| Origin                 | UNMR Bruker Analytische Messtechnik GmbH                       |
| Owner                  | root                                                           |
| Site                   |                                                                |
| Spectrometer           | dx400                                                          |
| Author                 |                                                                |
| Solvent                | DMSO                                                           |
| Temperature            | 300.0                                                          |
| Pulse Sequence         | aring.ty                                                       |
| Number of Scans        | 1996                                                           |
| Receiver Gain          | 32                                                             |
| Relaxation Delay       | 0.0000                                                         |
| Pulse Width            | 13.4000                                                        |
| Acquisition Time       | 0.395                                                          |
| Acquisition Date       | 2015-02-04 15:40:48                                            |
| Modification Date      | 2015-02-04 15:40:00                                            |
| Spectrometer Frequency | 128.38                                                         |
| Spectral Width         | 59.821                                                         |
| Lowest Frequency       | -18565.1                                                       |
| Nucleus                | 11B                                                            |
| Acquired Size          | 16384                                                          |
| Spectral Size          | 3888                                                           |

Supplementary Figure 64. <sup>11</sup>B NMR Spectrum of 3d.

crf-3-45-H-CDCl<sub>3</sub>

7.400  
7.260  
7.195

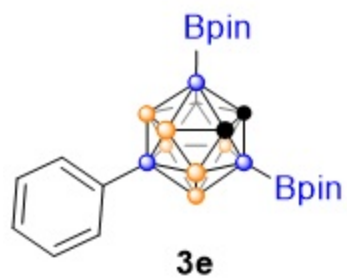

3.664  
3.565

1.287

| Parameter              | Value               |
|------------------------|---------------------|
| Title                  | crf-3-45-H          |
| Comment                | STANDARD 1H OBSERVE |
| Origin                 | Varian              |
| Owner                  |                     |
| Site                   |                     |
| Spectrometer           | mercury             |
| Author                 | omc                 |
| Solvent                | CDCl <sub>3</sub>   |
| Temperature            | 28.0                |
| Pulse Sequence         | sgpd                |
| Number of Scans        | 8                   |
| Receiver Gain          | 16                  |
| Relaxation Delay       | 1.000               |
| Pulse Width            | 0.000               |
| Acquisition Date       | 2015-04-01 15:51:46 |
| Spectrometer Frequency | 300.03              |
| Spectral Width         | 5494.5              |
| Lowest Frequency       | -709.8              |
| Nucleus                | <sup>1</sup> H      |
| Acquired Size          | 10076               |
| Spectral Size          | 3268                |

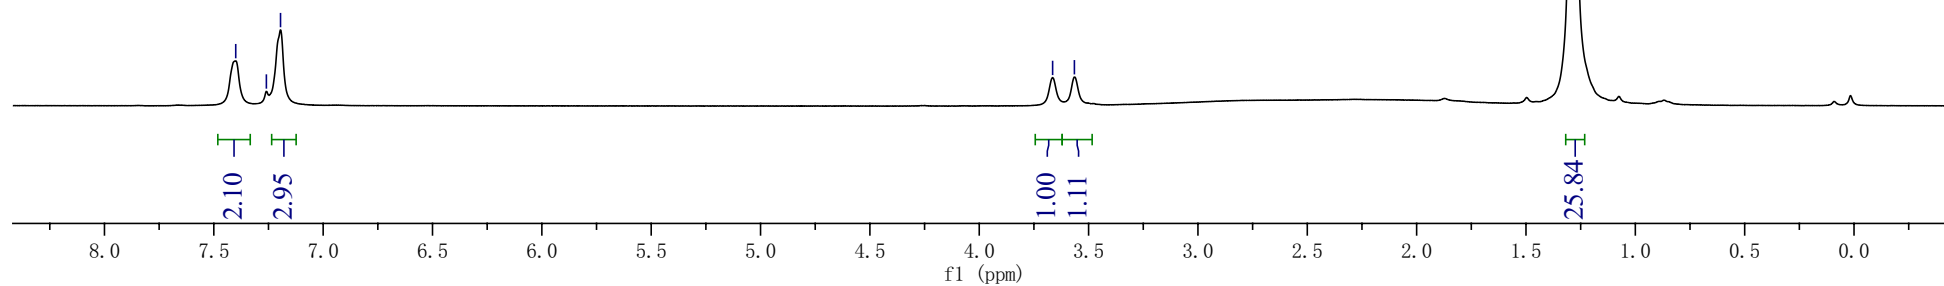

Supplementary Figure 65. <sup>1</sup>H NMR Spectrum of 3e.

crf-3-45-C-CDCl<sub>3</sub>

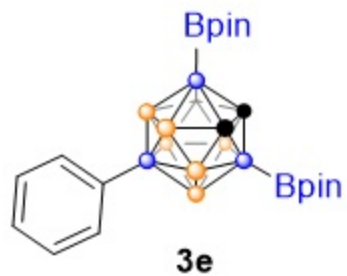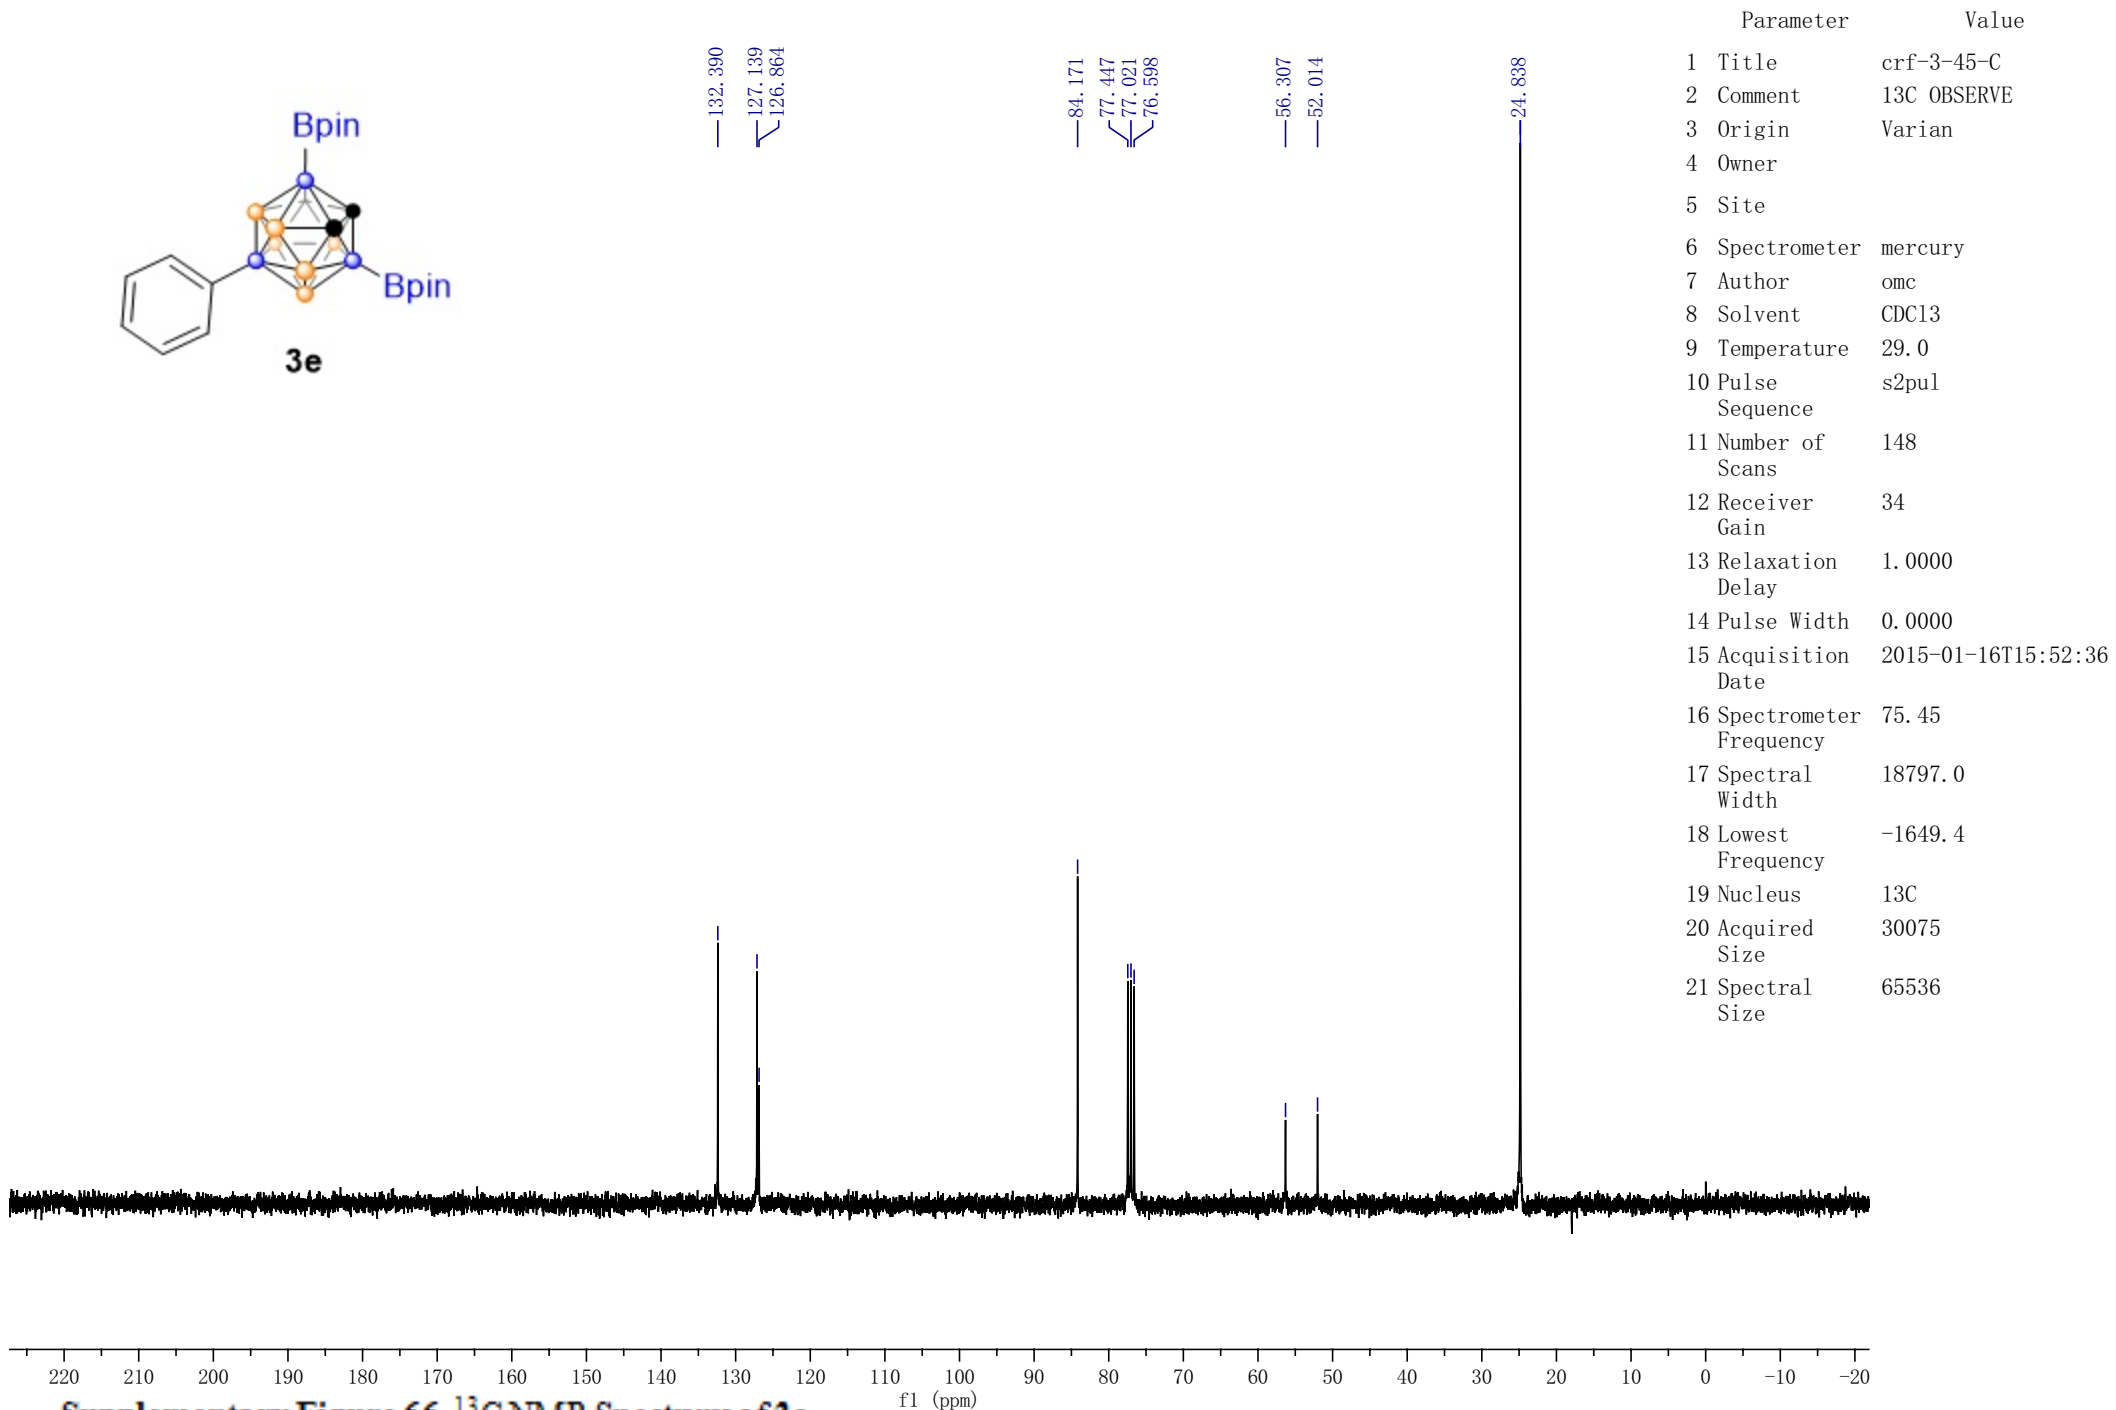

Supplementary Figure 66. <sup>13</sup>C NMR Spectrum of 3e.

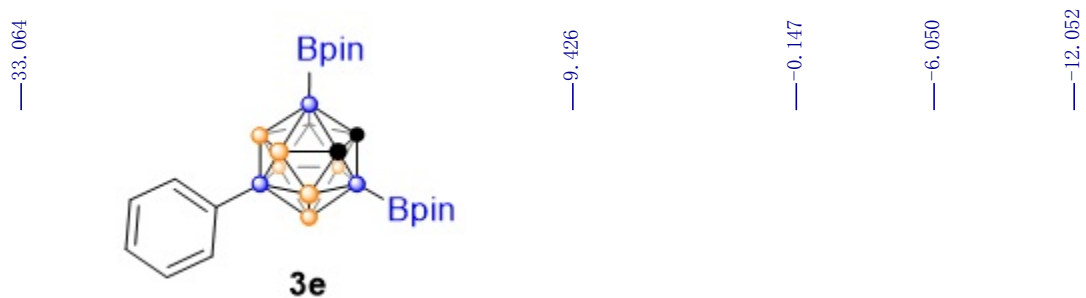

| Parameter              | Value                                             |
|------------------------|---------------------------------------------------|
| Data File Name         | C:/Users/Administrator/Desktop/b-crf-3-45 (1)/fid |
| Title                  | Desktop                                           |
| Comment                |                                                   |
| Origin                 | LWMR Bruker Analytische Messtechnik GmbH          |
| Owner                  | root                                              |
| Site                   |                                                   |
| Spectrometer           | dmx400                                            |
| Author                 |                                                   |
| Solvent                | DMSO                                              |
| Temperature            | 300.0                                             |
| Pulse Sequence         | aring.1gy                                         |
| Number of Scans        | 62                                                |
| Receiver Gain          | 32                                                |
| Relaxation Delay       | 0.0000                                            |
| Pulse Width            | 13.4000                                           |
| Acquisition Time       | 0.3135                                            |
| Acquisition Date       | 2015-01-21 18:58:06                               |
| Modification Date      | 2015-01-21 11:57:00                               |
| Spectrometer Frequency | 128.38                                            |
| Spectral Width         | 9.221                                             |
| Lowest Frequency       | -17.8019                                          |
| Nucleus                | <sup>11</sup> B                                   |
| Acquired Size          | 16384                                             |
| Spectral Size          | 3268                                              |

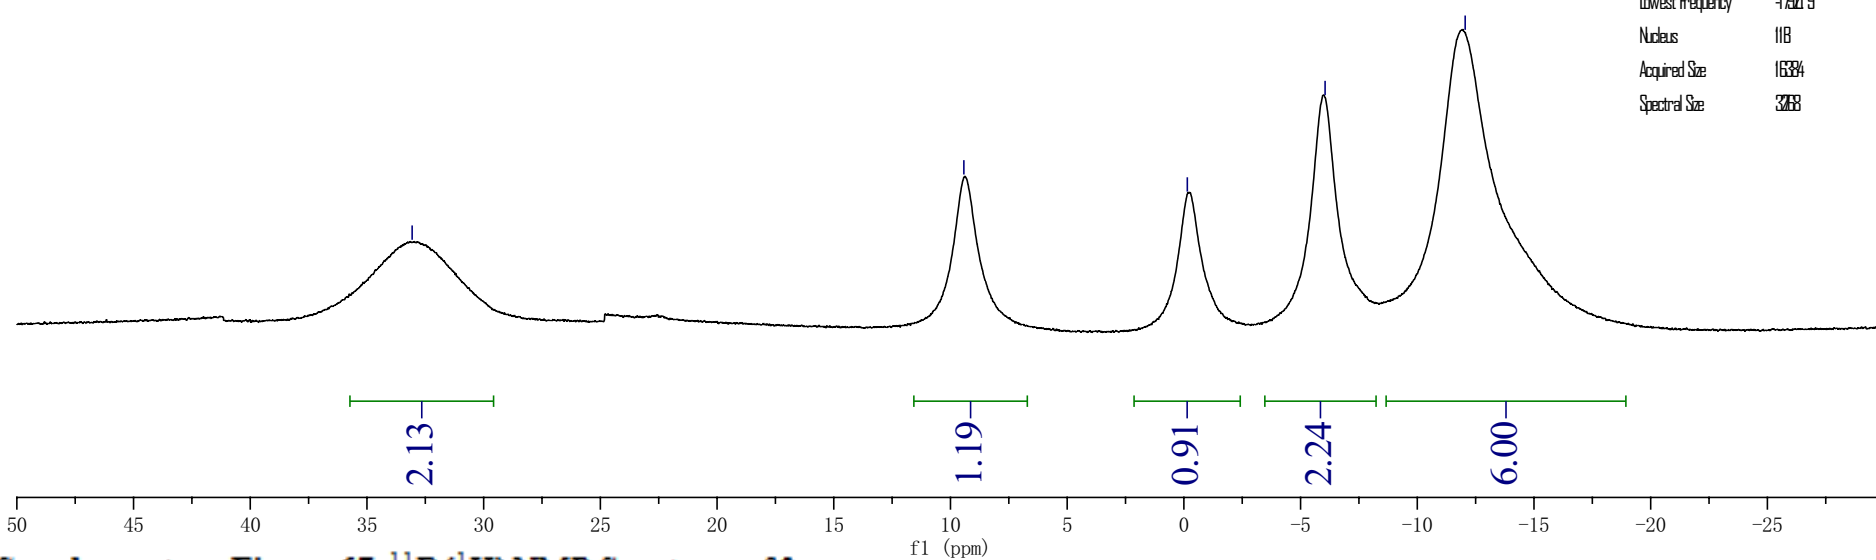

Supplementary Figure 67. <sup>11</sup>B{<sup>1</sup>H} NMR Spectrum of **3e**.



crf-3-45-B-coupling-CDCl<sub>3</sub>

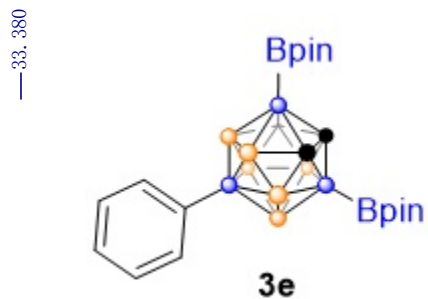

33.380

9.468

0.314

-0.706

-5.339

-6.493

-11.994

| Parameter                 | Value                                         |
|---------------------------|-----------------------------------------------|
| 1 Data File Name          | C:/Users/Administrator/Desktop/b-crf-3-45/fid |
| 2 Title                   | crf-3-45-B-coupling-CDCl <sub>3</sub>         |
| 3 Comment                 |                                               |
| 4 Origin                  | UXNMR, Bruker Analytische Messtechnik GmbH    |
| 5 Owner                   | root                                          |
| 6 Site                    |                                               |
| 7 Spectrometer            | drx400                                        |
| 8 Author                  |                                               |
| 9 Solvent                 | CDCl <sub>3</sub>                             |
| 10 Temperature            | 300.0                                         |
| 11 Pulse Sequence         | aring.lgy                                     |
| 12 Number of Scans        | 1600                                          |
| 13 Receiver Gain          | 32                                            |
| 14 Relaxation Delay       | 0.0000                                        |
| 15 Pulse Width            | 13.4000                                       |
| 16 Acquisition Time       | 0.3195                                        |
| 17 Acquisition Date       | 2015-03-09T15:57:45                           |
| 18 Modification Date      | 2015-03-09T08:57:00                           |
| 19 Spectrometer Frequency | 128.38                                        |
| 20 Spectral Width         | 51282.1                                       |
| 21 Lowest Frequency       | -15466.9                                      |
| 22 Nucleus                | 11B                                           |
| 23 Acquired Size          | 16384                                         |
| 24 Spectral Size          | 32768                                         |

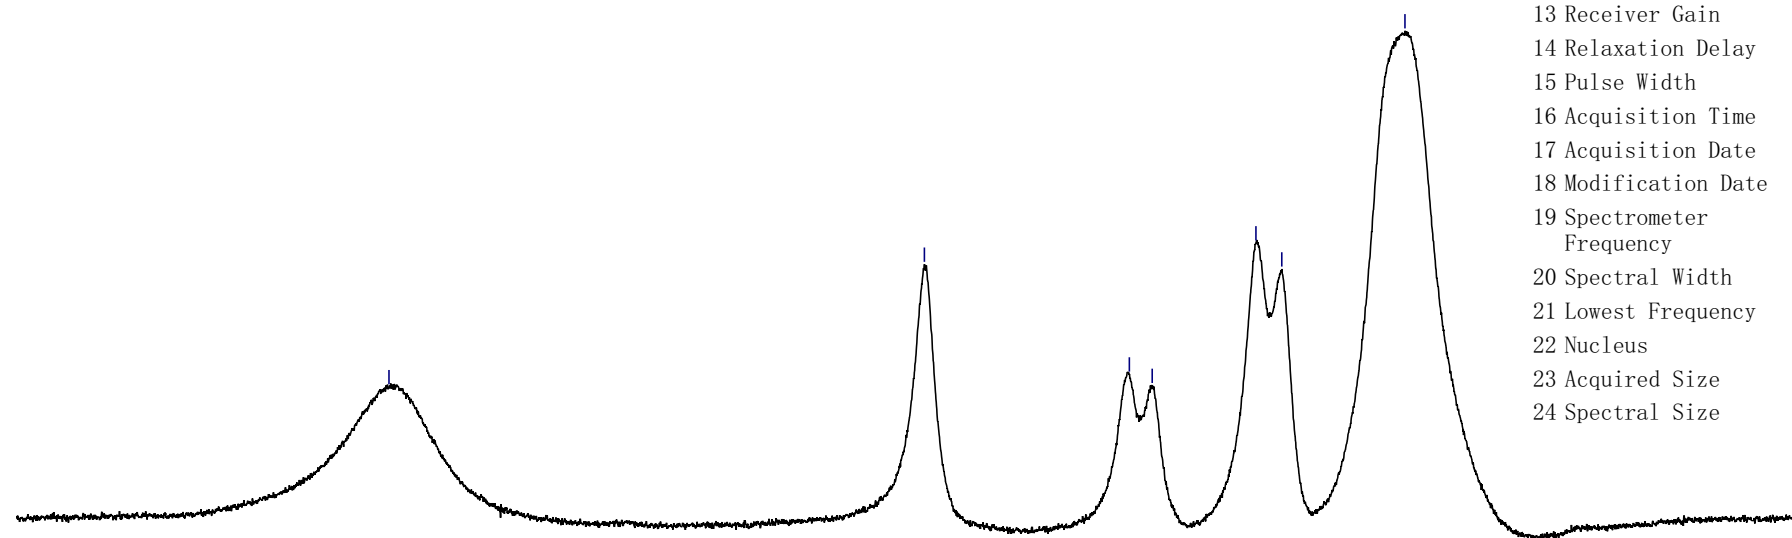

50 45 40 35 30 25 20 15 10 5 0 -5 -10 -15 -20 -25

Supplementary Figure 68. <sup>11</sup>B NMR Spectrum of **3e**.

crf-4-44-H-CDCl<sub>3</sub>

7.524  
7.505  
7.260  
7.080  
7.059  
7.033  
7.021

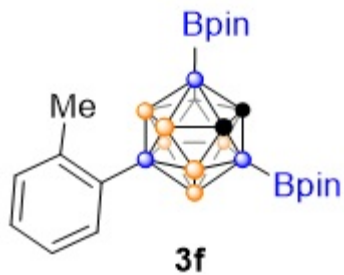

3.633  
3.587

2.475

1.278

| Parameter              | Value                |
|------------------------|----------------------|
| Title                  | crf-4-44-H           |
| Comment                | STANDARD 1H OBSERVE  |
| Origin                 | Varian               |
| Owner                  |                      |
| Site                   |                      |
| Spectrometer           | mercury              |
| Author                 | omc                  |
| Solvent                | CDCl <sub>3</sub>    |
| Temperature            | 29.0                 |
| Pulse Sequence         | zgpg30               |
| Number of Scans        | 16                   |
| Receiver Gain          | 34                   |
| Relaxation Delay       | 1.0000               |
| Pulse Width            | 0.0000               |
| Acquisition Date       | 2015-04-20T11: 2: 35 |
| Spectrometer Frequency | 300.03               |
| Spectral Width         | 5494.5               |
| Lowest Frequency       | -703.3               |
| Nucleus                | 1H                   |
| Acquired Size          | 10876                |
| Spectral Size          | 3268                 |

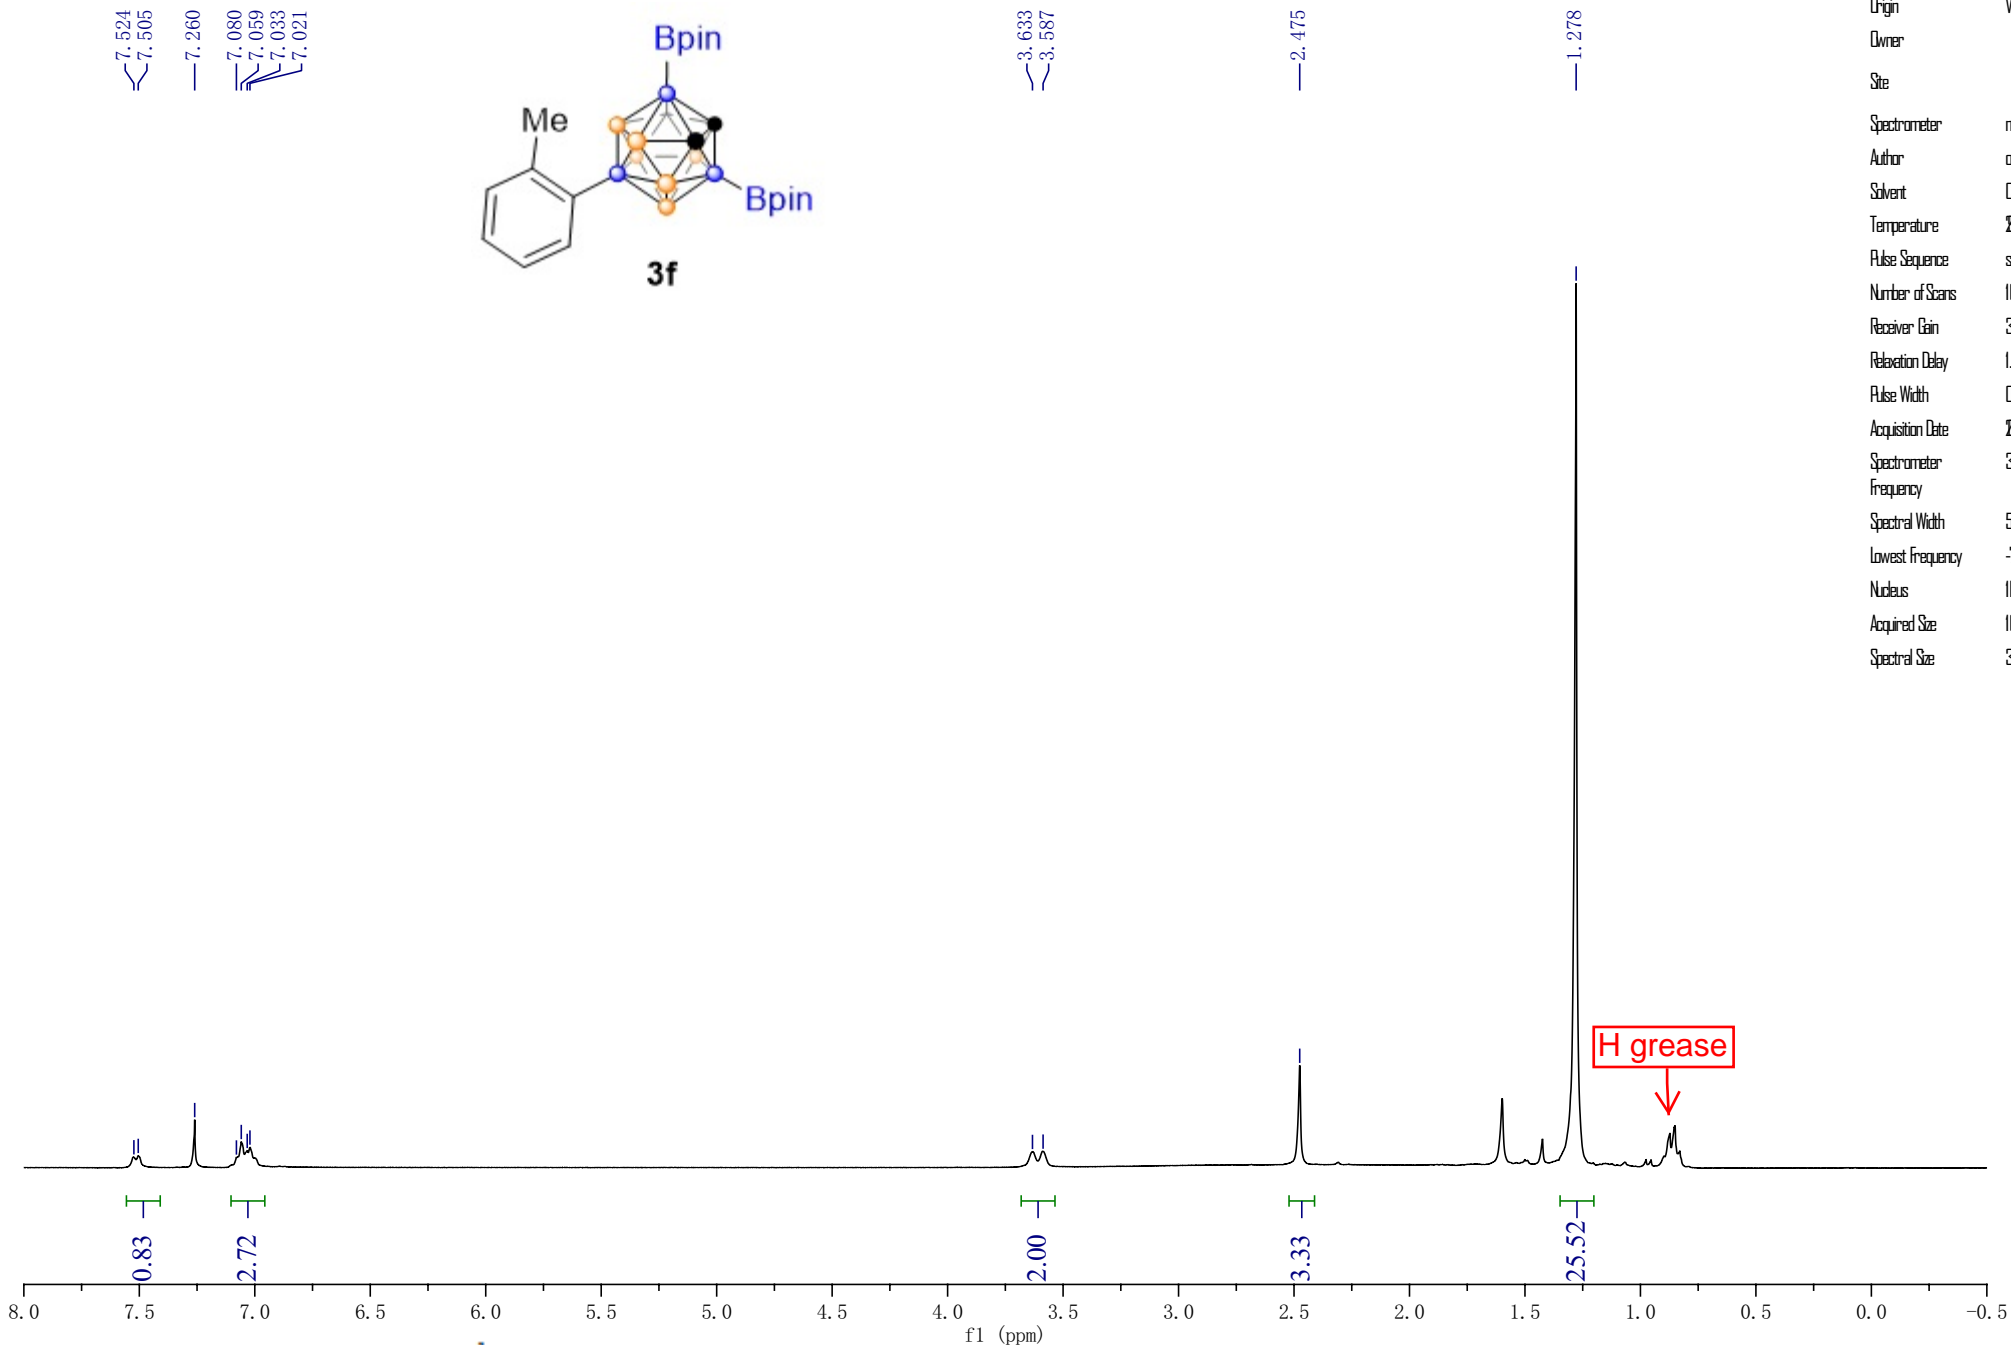

Supplementary Figure 69. <sup>1</sup>H NMR Spectrum of 3f.

S90

crf-4-44-H-CDCl<sub>3</sub>

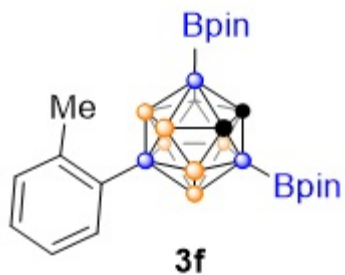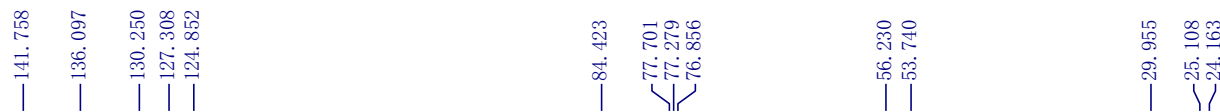

| Parameter              | Value               |
|------------------------|---------------------|
| Title                  | crf-4-44-C          |
| Comment                | 13C OBSERVE         |
| Origin                 | Varian              |
| Owner                  |                     |
| Site                   |                     |
| Spectrometer           | mercury             |
| Author                 | onc                 |
| Solvent                | CDCl <sub>3</sub>   |
| Temperature            | 29.0                |
| Pulse Sequence         | squl                |
| Number of Scans        | 20                  |
| Receiver Gain          | 34                  |
| Relaxation Delay       | 1.0000              |
| Pulse Width            | 0.0000              |
| Acquisition Date       | 2015-04-27 22:41:17 |
| Spectrometer Frequency | 76.45               |
| Spectral Width         | 18887.0             |
| Lowest Frequency       | -162.8              |
| Nucleus                | 13C                 |
| Acquired Size          | 28155               |
| Spectral Size          | 65536               |

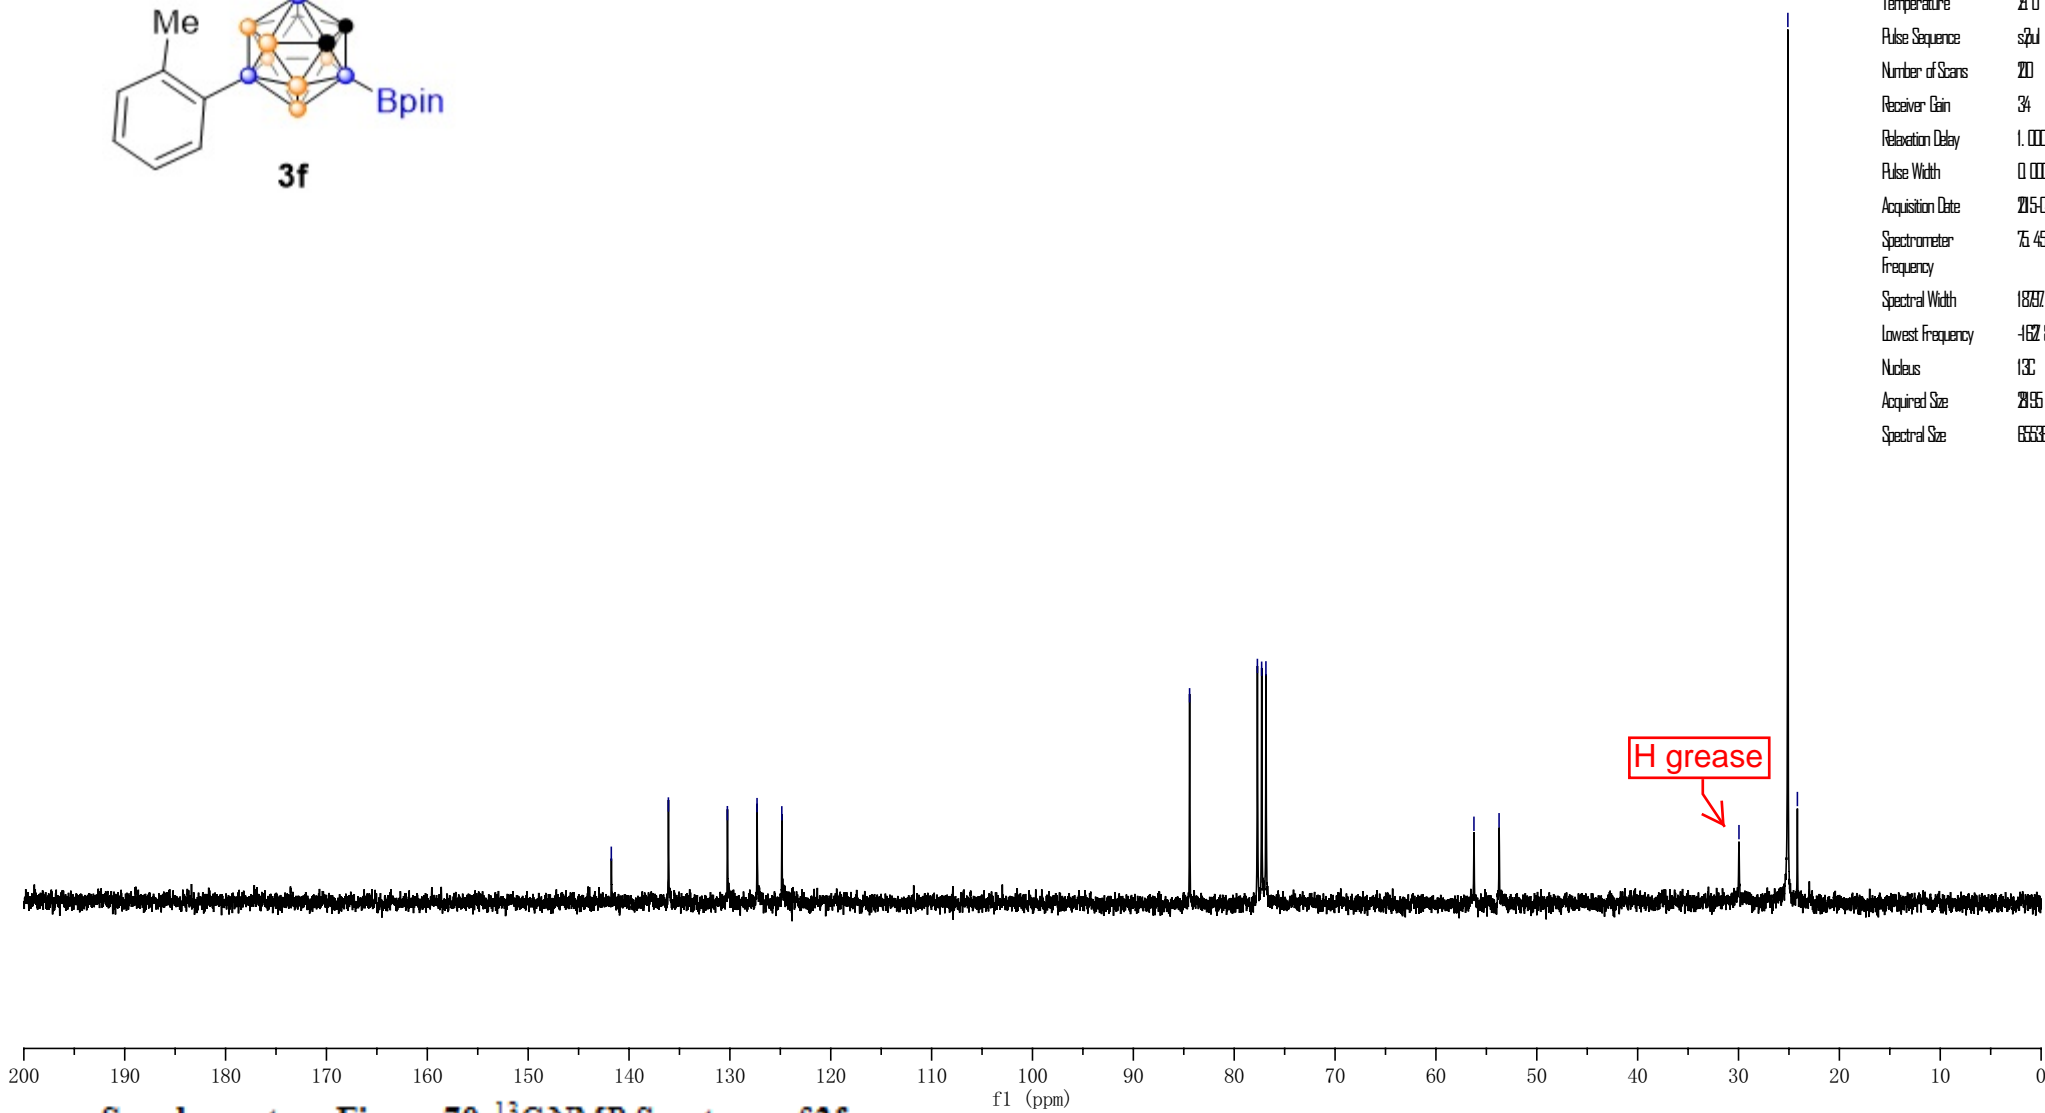

Supplementary Figure 70. <sup>13</sup>C NMR Spectrum of **3f**.

crf-444-B-decoupling-CDCl<sub>3</sub>

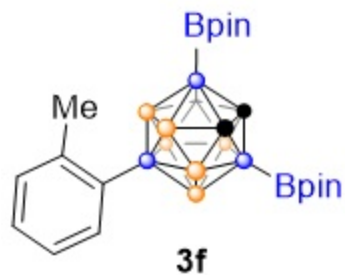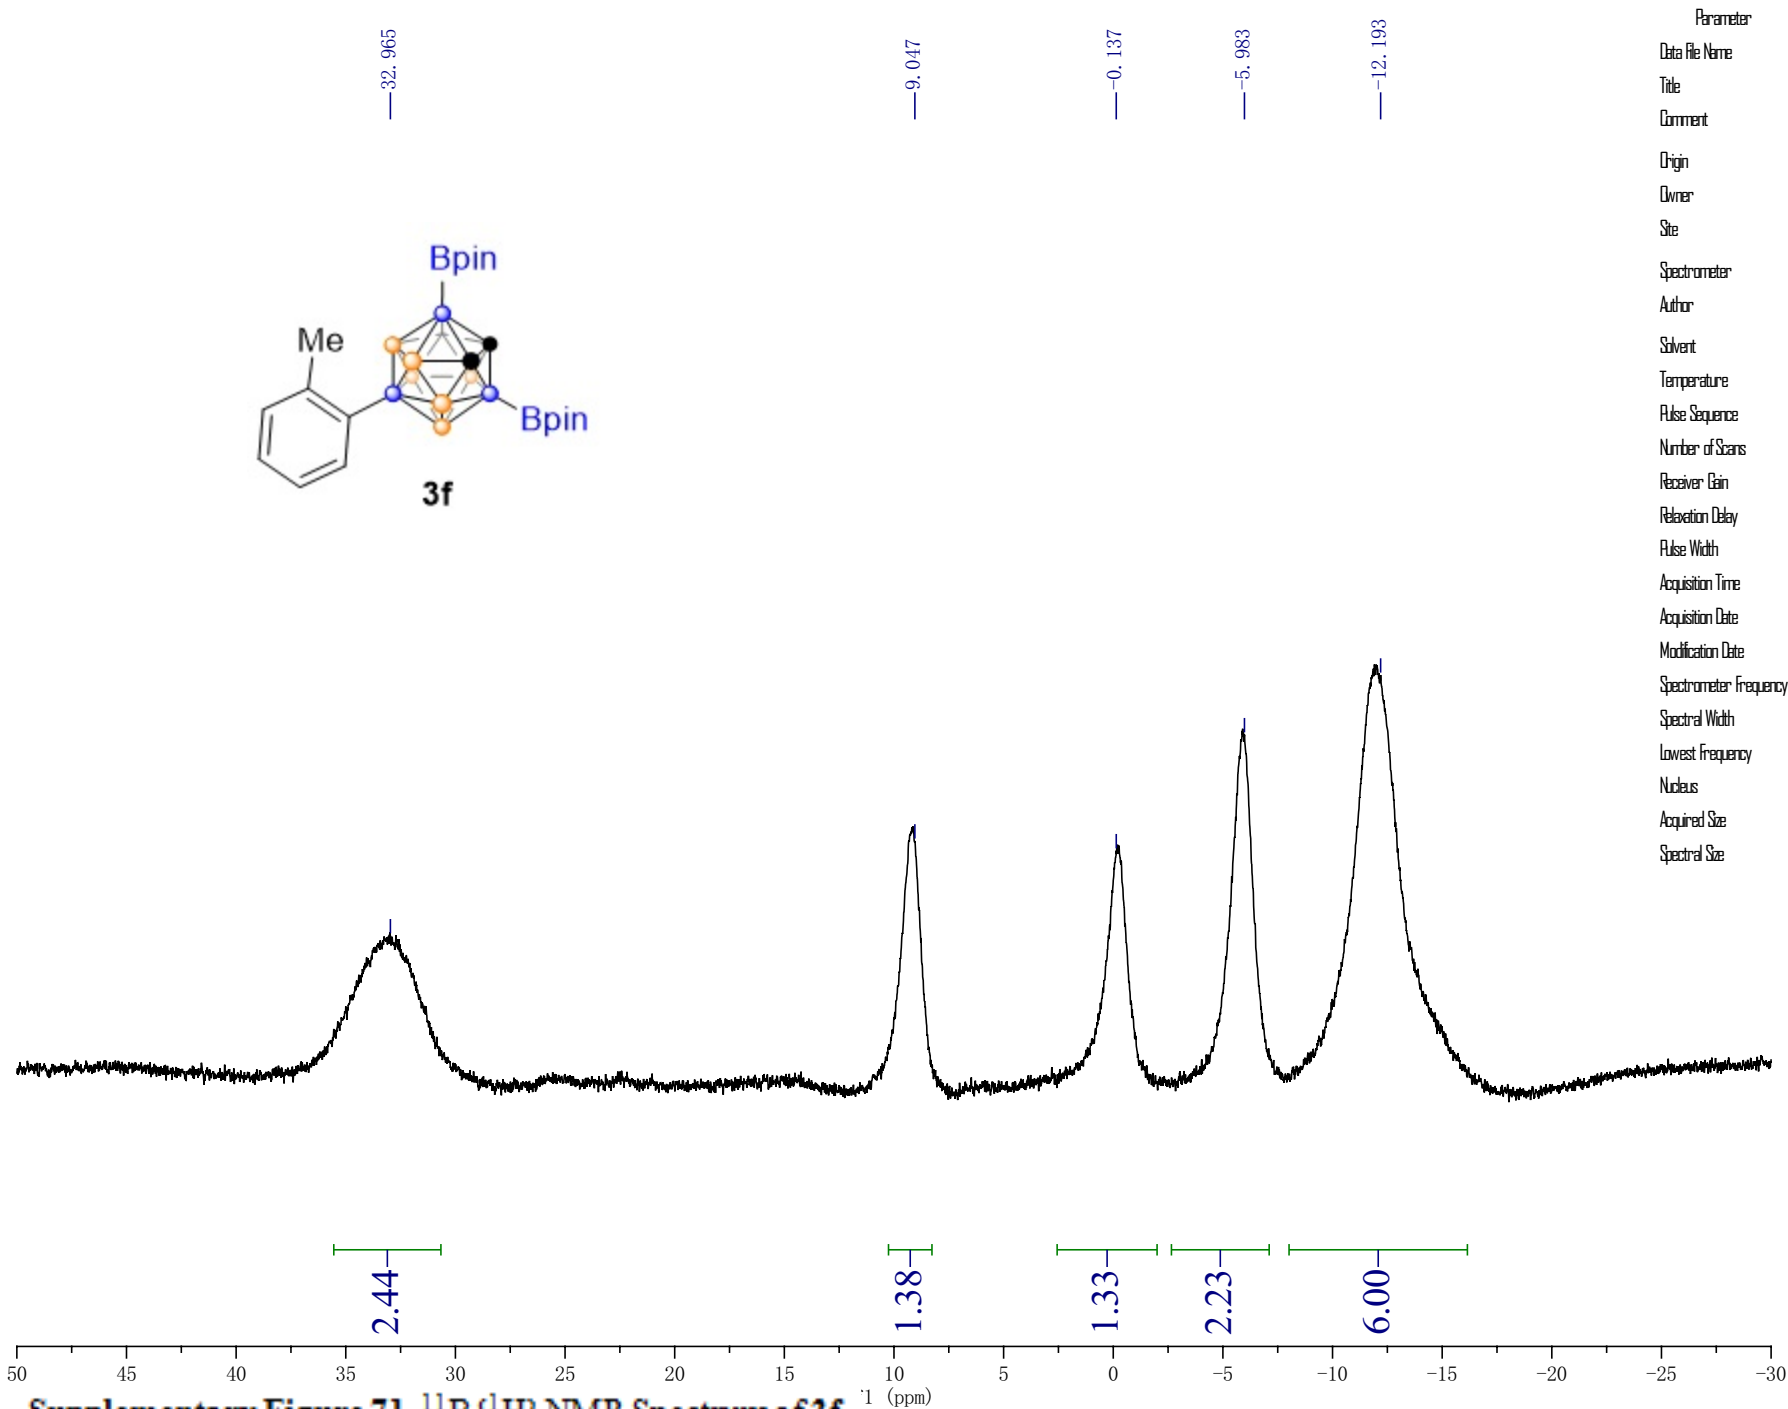

| Parameter              | Value                                       |
|------------------------|---------------------------------------------|
| Data File Name         | C:/Users/Administrator/Desktop/b-orf444/tid |
| Title                  | Desktop                                     |
| Comment                |                                             |
| Origin                 | UNMR Bruker Analytische Messtechnik GmbH    |
| Owner                  | root                                        |
| Site                   |                                             |
| Spectrometer           | dx400                                       |
| Author                 |                                             |
| Solvent                | DMSO                                        |
| Temperature            | 300.0                                       |
| Pulse Sequence         | aring_1g                                    |
| Number of Scans        | 20                                          |
| Receiver Gain          | 32                                          |
| Relaxation Delay       | 0.0000                                      |
| Pulse Width            | 13.4000                                     |
| Acquisition Time       | 0.3155                                      |
| Acquisition Date       | 2015-04-20 13:01:46                         |
| Modification Date      | 2015-04-20 13:01:00                         |
| Spectrometer Frequency | 128.38                                      |
| Spectral Width         | 9.221                                       |
| Lowest Frequency       | -1789.3                                     |
| Nucleus                | 11B                                         |
| Acquired Size          | 16394                                       |
| Spectral Size          | 3268                                        |

Supplementary Figure 71. <sup>11</sup>B{<sup>1</sup>H} NMR Spectrum of **3f**.

crf-444-B-decoupling-CDCl<sub>3</sub>

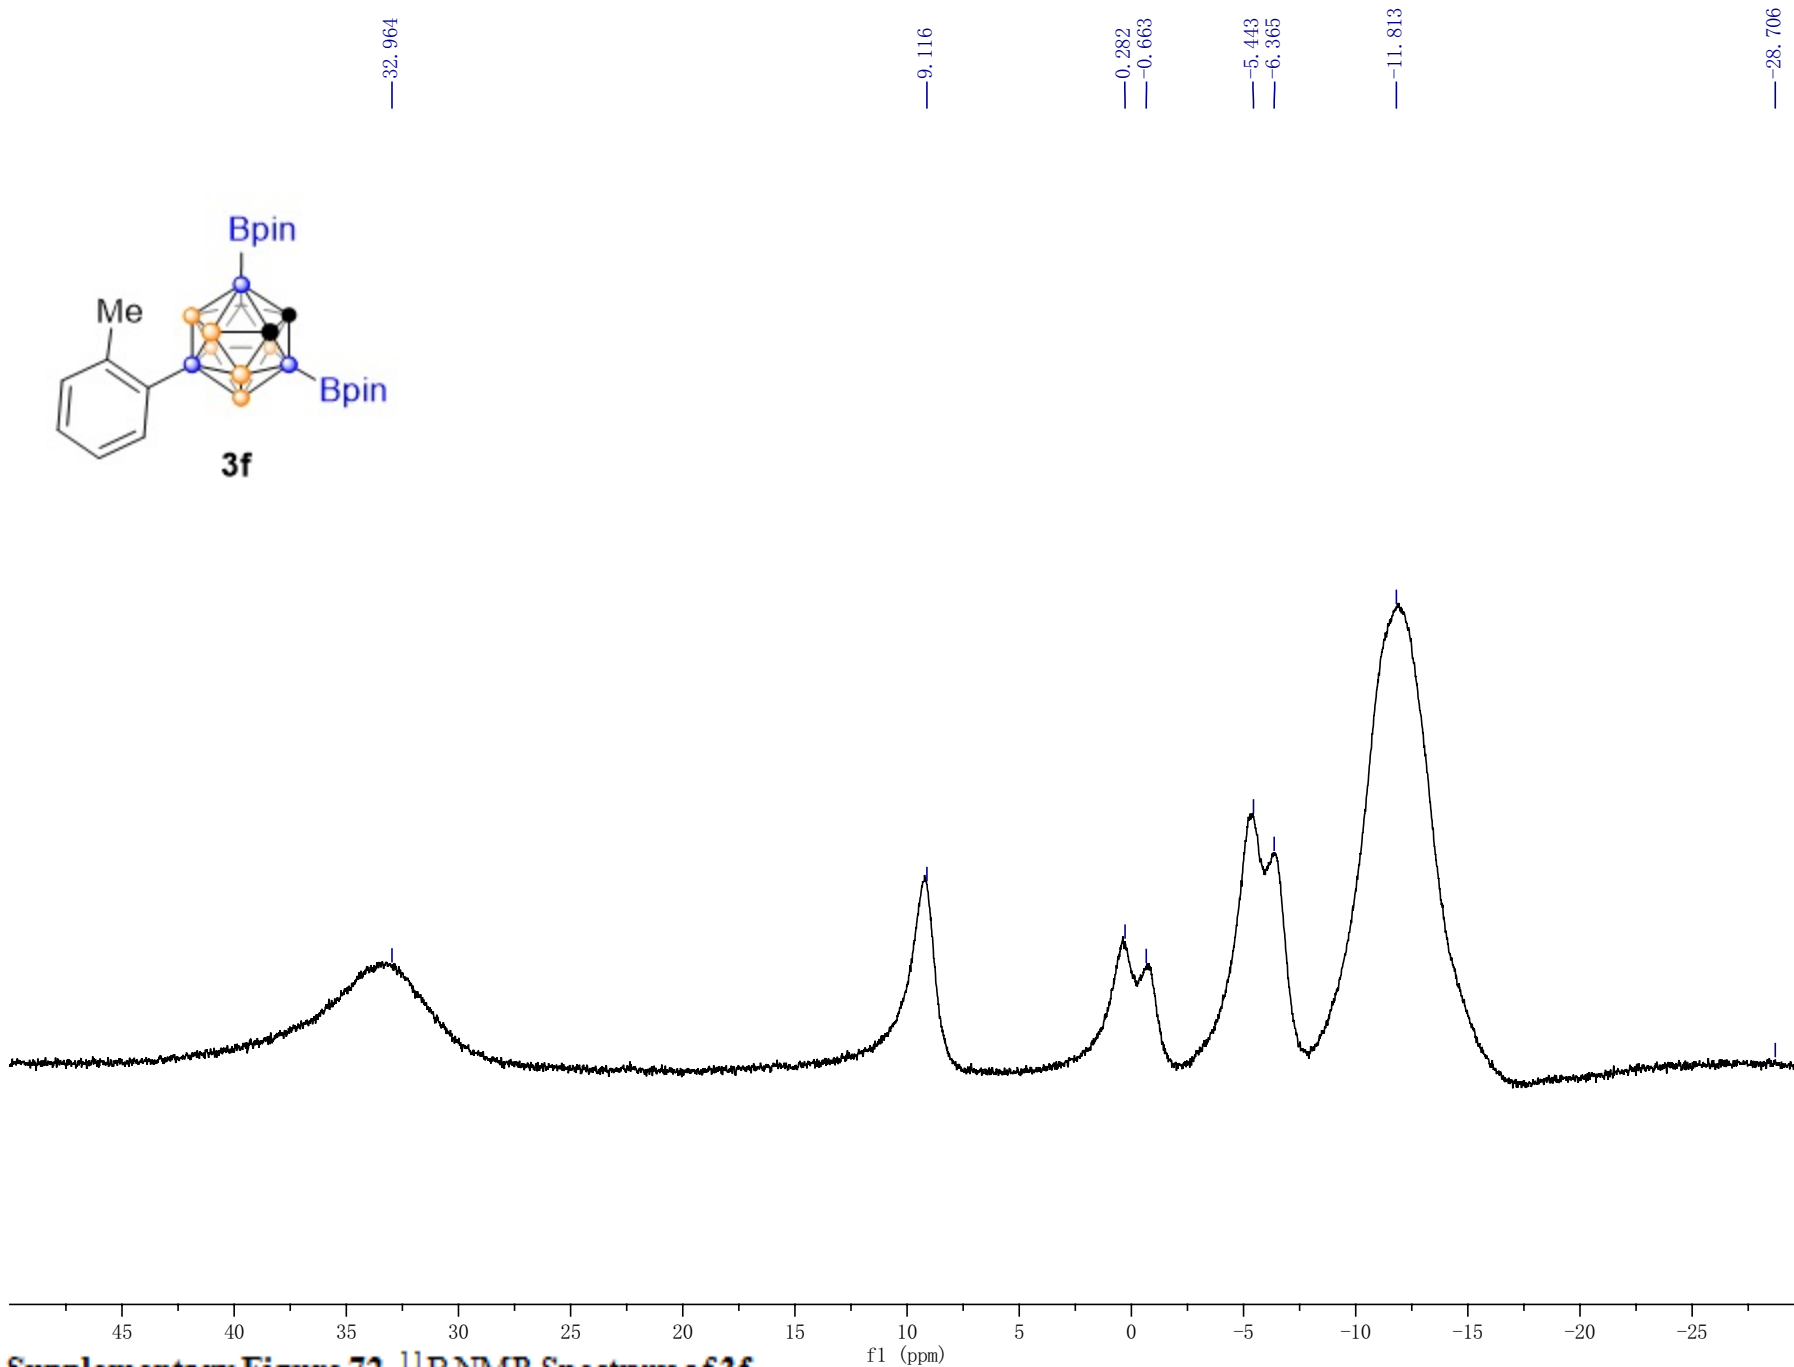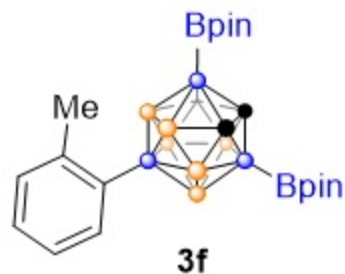

| Parameter              | Value                                              |
|------------------------|----------------------------------------------------|
| Data File Name         | C:/Users/Administrator/Desktop/b-cr444-coupling/1d |
| Title                  | Desktop                                            |
| Comment                |                                                    |
| Origin                 | UNMR Bruker Analytische Messtechnik GmbH           |
| Owner                  | root                                               |
| Site                   |                                                    |
| Spectrometer           | dr400                                              |
| Author                 |                                                    |
| Solvent                | DMSO                                               |
| Temperature            | 300.0                                              |
| Pulse Sequence         | aring1g                                            |
| Number of Scans        | 400                                                |
| Receiver Gain          | 32                                                 |
| Relaxation Delay       | 0.0000                                             |
| Pulse Width            | 13.4000                                            |
| Acquisition Time       | 0.3155                                             |
| Acquisition Date       | 2015-04-20 19:04:45                                |
| Modification Date      | 2015-04-20 13:04:00                                |
| Spectrometer Frequency | 128.38                                             |
| Spectral Width         | 57201                                              |
| Lowest Frequency       | -44628.4                                           |
| Nucleus                | 11B                                                |
| Acquired Size          | 16384                                              |
| Spectral Size          | 3268                                               |

Supplementary Figure 72. <sup>11</sup>B NMR Spectrum of **3f**.

crf-3-90-H-CDCl<sub>3</sub>

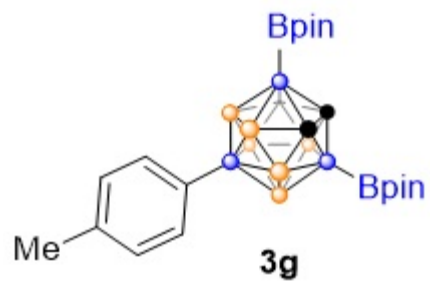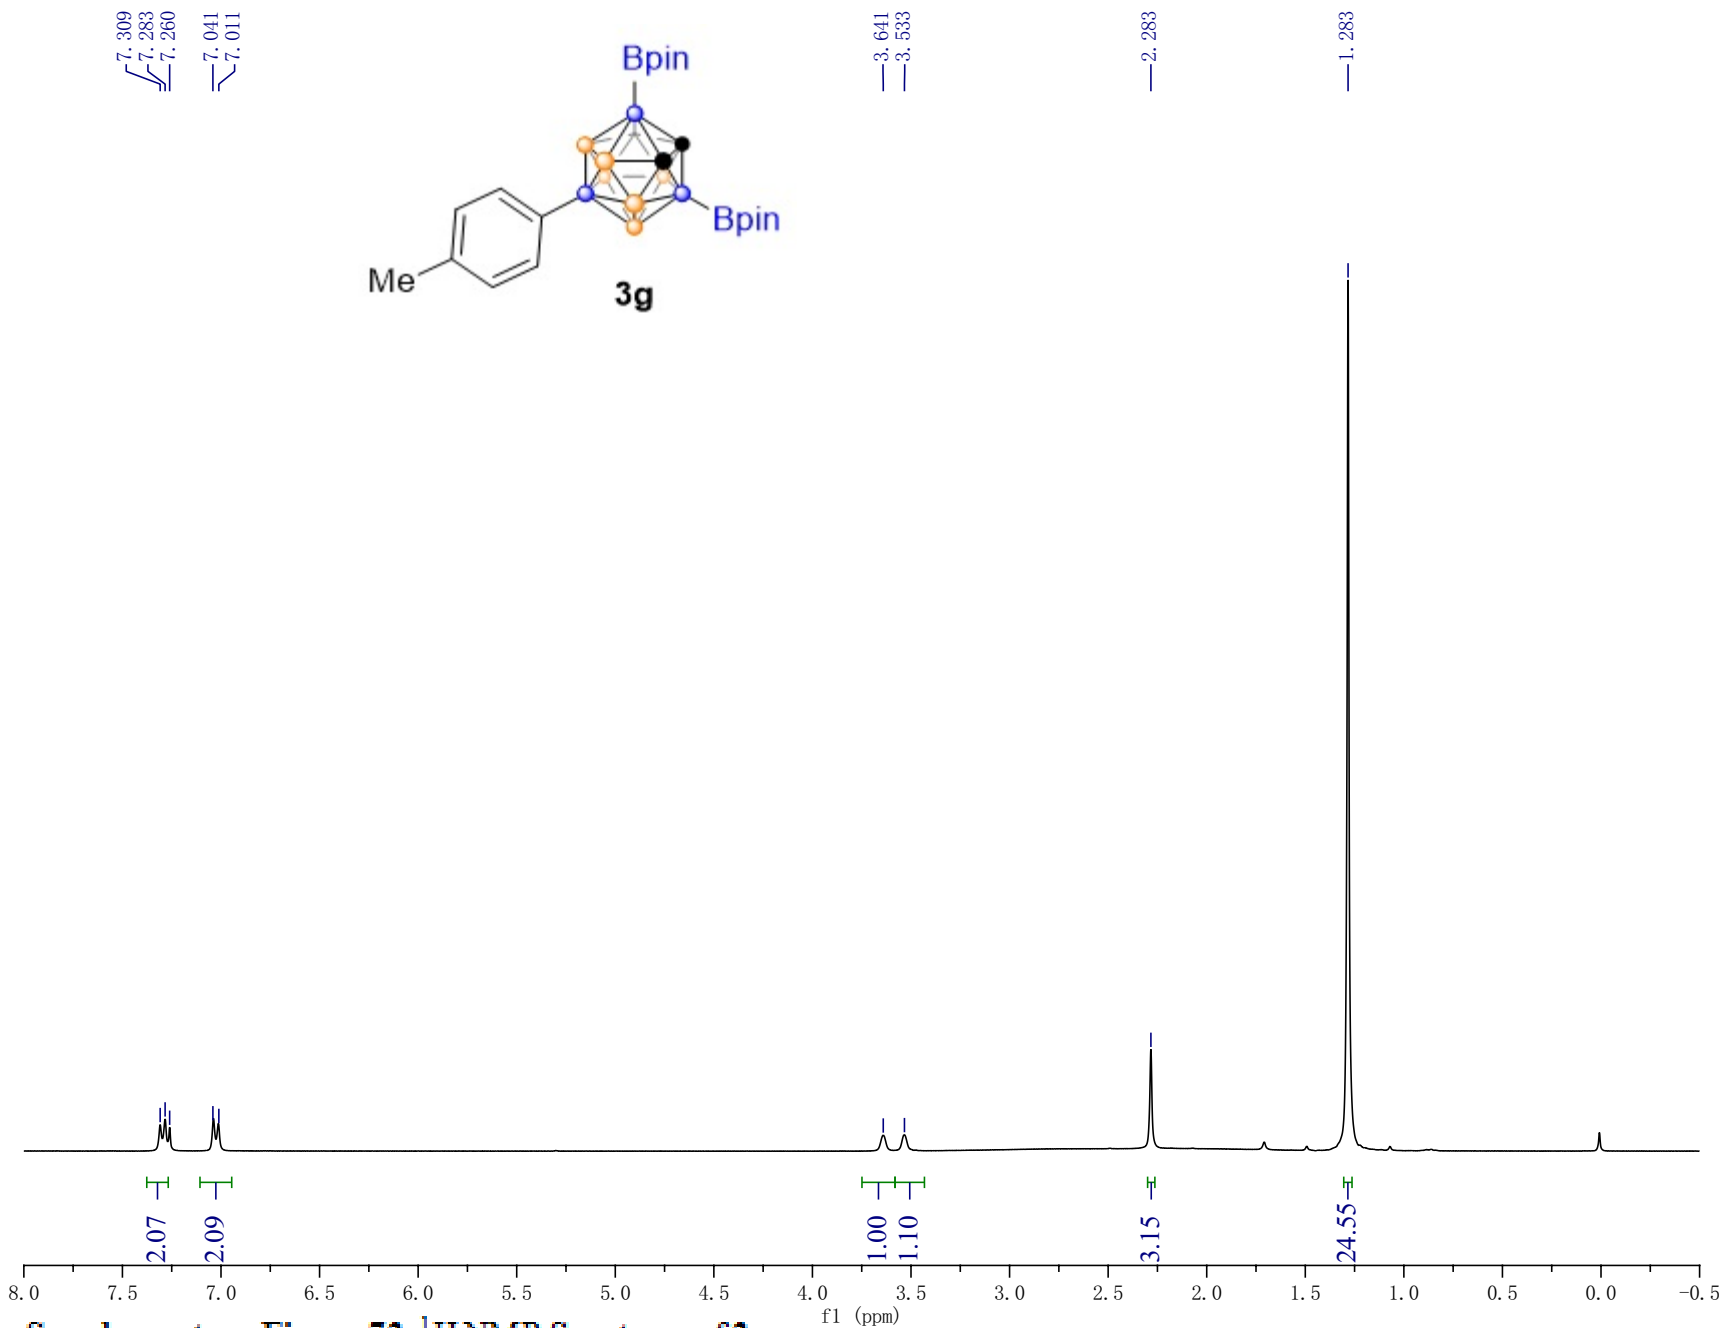

| Parameter              | Value               |
|------------------------|---------------------|
| Title                  | crf-3-90-H          |
| Comment                | STANDARD 1H OBSERVE |
| Origin                 | Varian              |
| Owner                  |                     |
| Site                   |                     |
| Spectrometer           | mercury             |
| Author                 | omc                 |
| Solvent                | CDCl3               |
| Temperature            | 20.0                |
| Pulse Sequence         | sgzg                |
| Number of Scans        | 4                   |
| Receiver Gain          | 2                   |
| Relaxation Delay       | 1.0000              |
| Pulse Width            | 0.0000              |
| Acquisition Date       | 2015-02-27 09:58    |
| Spectrometer Frequency | 300.03              |
| Spectral Width         | 5494.5              |
| Lowest Frequency       | -703.7              |
| Nucleus                | 1H                  |
| Acquired Size          | 10876               |
| Spectral Size          | 3268                |

Supplementary Figure 73. <sup>1</sup>H NMR Spectrum of **3g**.

crf-3-90-C-CDCl<sub>3</sub>

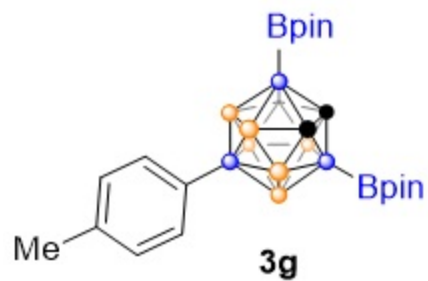

136.254  
132.261  
127.886

84.046  
77.379  
76.956  
76.534

56.219  
51.687

24.729  
21.055

| Parameter              | Value            |
|------------------------|------------------|
| Title                  | crf3-90-C        |
| Comment                | 13C CESSRVE      |
| Origin                 | Varian           |
| Owner                  |                  |
| Site                   |                  |
| Spectrometer           | mercury          |
| Author                 | omc              |
| Solvent                | CDCl3            |
| Temperature            | 29.0             |
| Pulse Sequence         | sZul             |
| Number of Scans        | 48               |
| Receiver Gain          | 34               |
| Relaxation Delay       | 1.0000           |
| Pulse Width            | 0.0000           |
| Acquisition Date       | 2015-02-22 10:55 |
| Spectrometer Frequency | 76.45            |
| Spectral Width         | 1901.4           |
| Lowest Frequency       | -1766.4          |
| Nucleus                | 13C              |
| Acquired Size          | 2517             |
| Spectral Size          | 65536            |

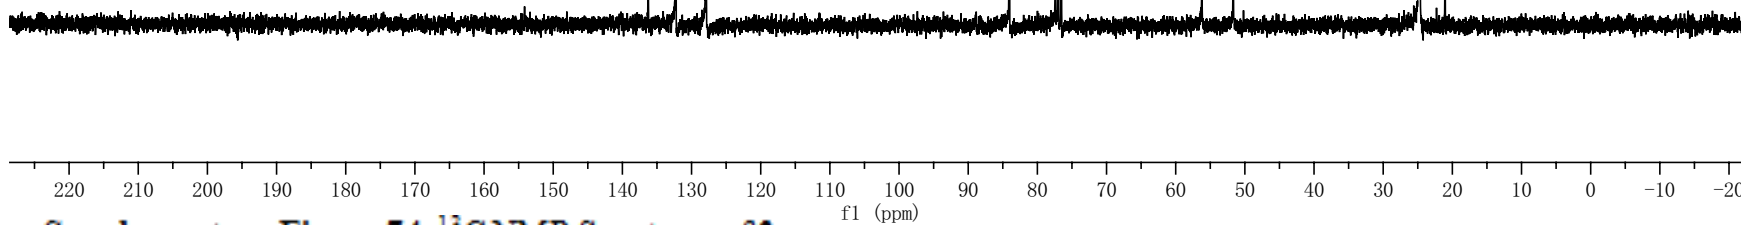

Supplementary Figure 74. <sup>13</sup>C NMR Spectrum of **3g**.

crf-3-90-B-decoupling-CDC13

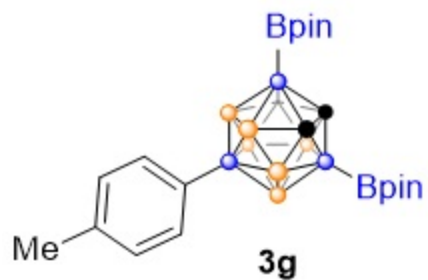

| Parameter              | Value                                       |
|------------------------|---------------------------------------------|
| Data File Name         | E:/Users/Administrator/Desktop/bcrf3-90/tid |
| Title                  | Desktop                                     |
| Comment                |                                             |
| Origin                 | UNMR Bruker Analytische Messtechnik GmbH    |
| Owner                  | root                                        |
| Site                   |                                             |
| Spectrometer           | dx400                                       |
| Author                 |                                             |
| Solvent                | DMSO                                        |
| Temperature            | 300.0                                       |
| Pulse Sequence         | aning.ty                                    |
| Number of Scans        | 800                                         |
| Receiver Gain          | 32                                          |
| Relaxation Delay       | 0.0000                                      |
| Pulse Width            | 13.4000                                     |
| Acquisition Time       | 0.3195                                      |
| Acquisition Date       | 2015-08-31 15:48:04                         |
| Modification Date      | 2015-08-31 08:49:00                         |
| Spectrometer Frequency | 128.38                                      |
| Spectral Width         | 51.221                                      |
| Lowest Frequency       | -17320.9                                    |
| Nucleus                | 11B                                         |
| Acquired Size          | 16384                                       |
| Spectral Size          | 3268                                        |

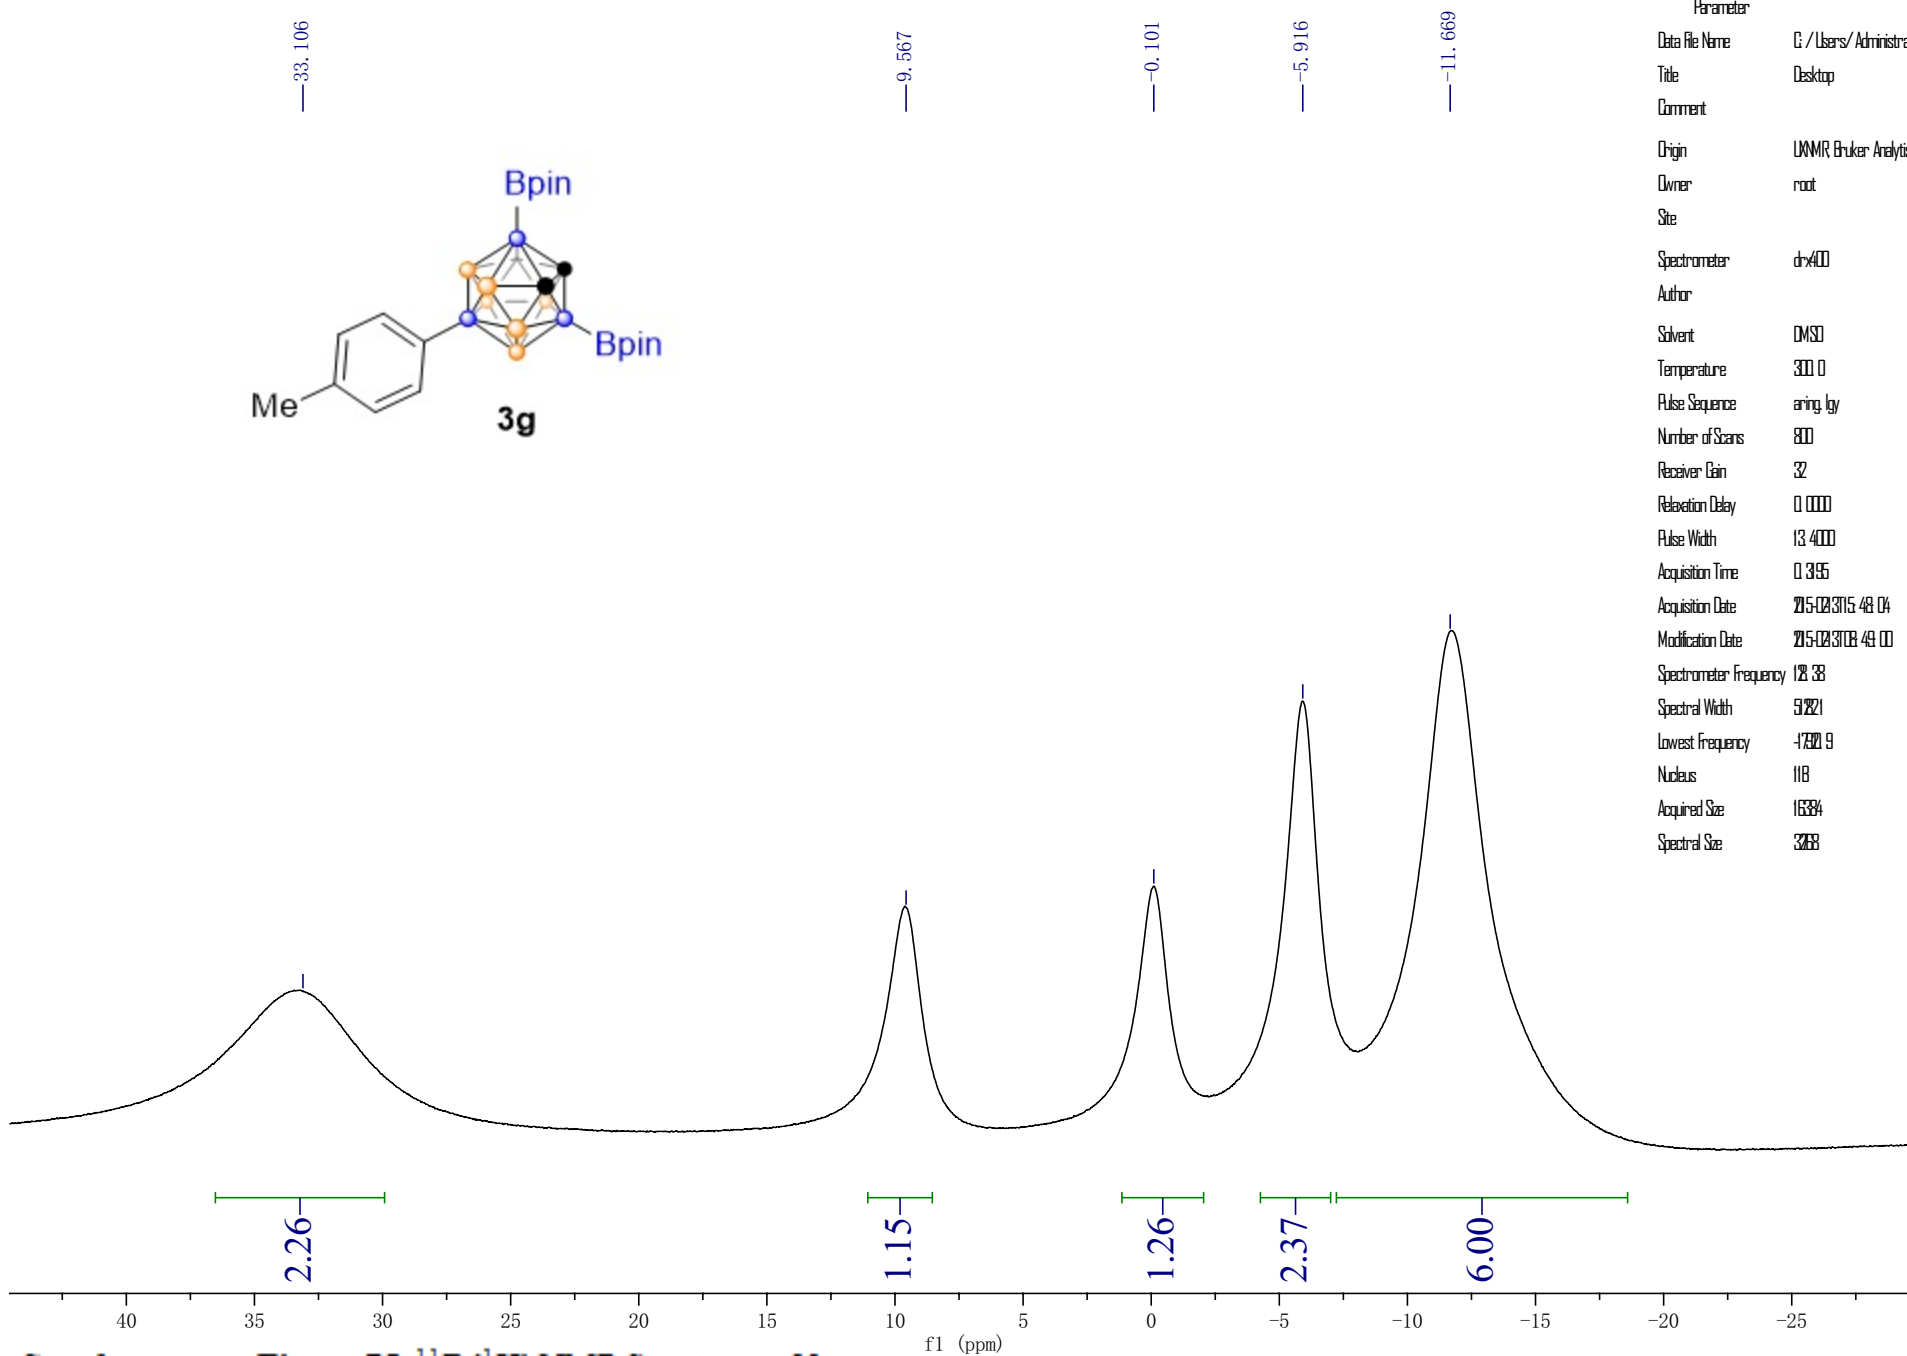

Supplementary Figure 75. <sup>11</sup>B{<sup>1</sup>H} NMR Spectrum of **3g**.



crf-3-90-B-coupling-CDC13

| Parameter              | Value                                                          |
|------------------------|----------------------------------------------------------------|
| Data File Name         | C:/Users/Administrator/Desktop/b-crf3-90-withoutdecoupling/fid |
| Title                  | Desktop                                                        |
| Comment                |                                                                |
| Origin                 | UNMR Bruker Analytische Messtechnik GmbH                       |
| Owner                  | root                                                           |
| Site                   |                                                                |
| Spectrometer           | dmx400                                                         |
| Author                 |                                                                |
| Solvent                | DMSO                                                           |
| Temperature            | 300.0                                                          |
| Pulse Sequence         | aring.1g                                                       |
| Number of Scans        | 800                                                            |
| Receiver Gain          | 32                                                             |
| Relaxation Delay       | 0.0000                                                         |
| Pulse Width            | 13.4000                                                        |
| Acquisition Time       | 0.395                                                          |
| Acquisition Date       | 2015-02-31 15:54:28                                            |
| Modification Date      | 2015-02-31 08:54:00                                            |
| Spectrometer Frequency | 128.39                                                         |
| Spectral Width         | 9.2821                                                         |
| Lowest Frequency       | -16557.0                                                       |
| Nucleus                | 11B                                                            |
| Acquired Size          | 16394                                                          |
| Spectral Size          | 3268                                                           |

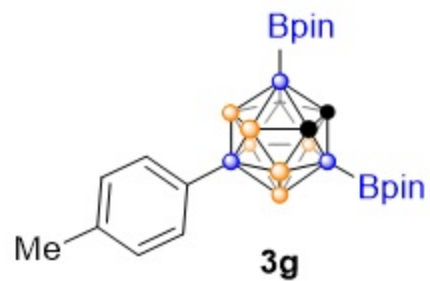

36.255

12.507

3.182  
2.316

2.452  
3.332

8.593

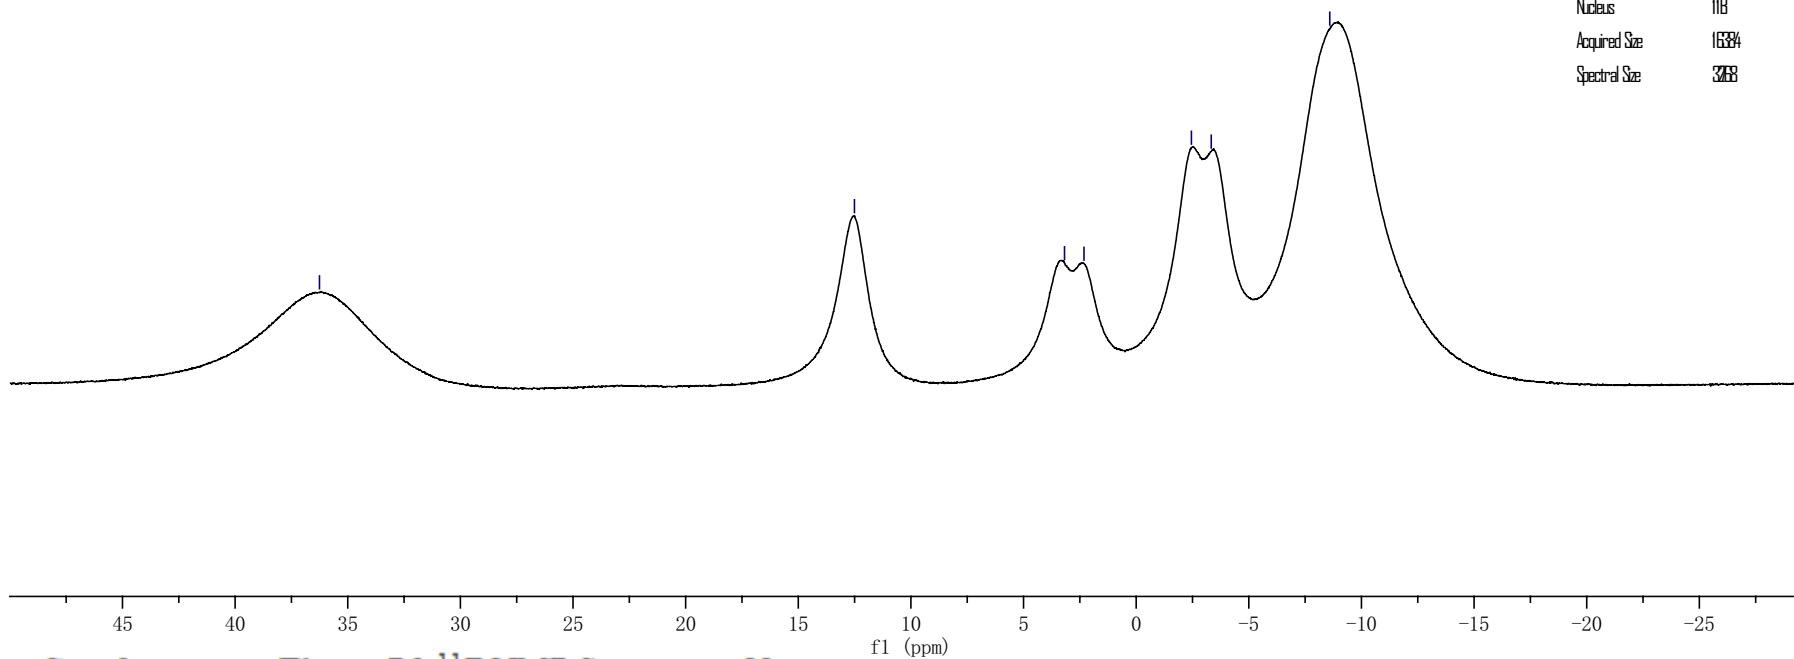

Supplementary Figure 76. <sup>11</sup>B NMR Spectrum of **3g**.

crf-4-45-H-CDCl<sub>3</sub>

7.340  
7.319  
7.293  
7.245  
6.889  
6.860  
6.831

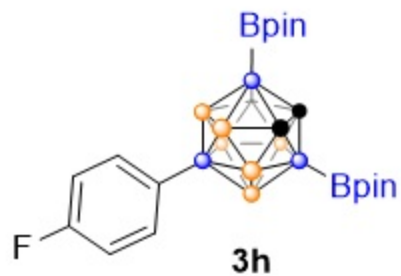

3.632  
3.530

1.262

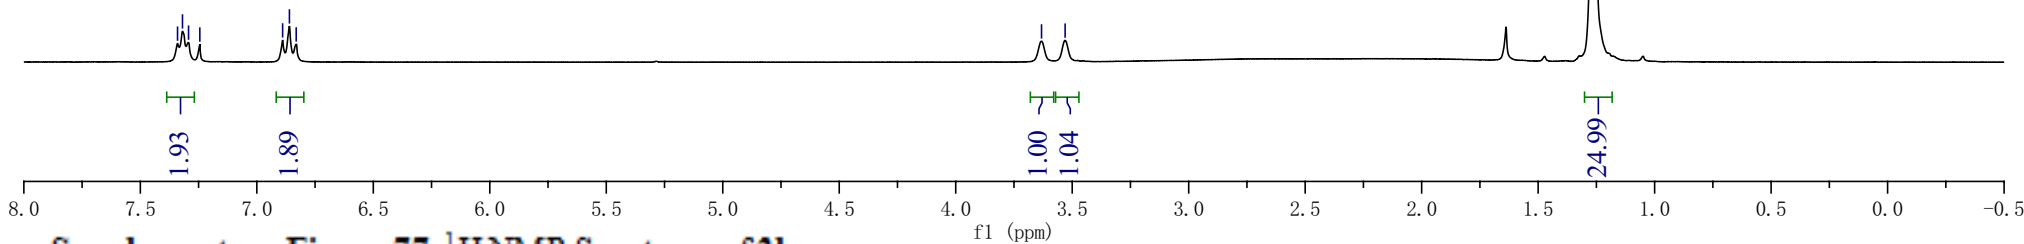

| Parameter              | Value               |
|------------------------|---------------------|
| Title                  | crf-4-45-H          |
| Comment                | STANDARD 1H OBSERVE |
| Origin                 | Varian              |
| Owner                  |                     |
| Site                   |                     |
| Spectrometer           | mercury             |
| Author                 | omc                 |
| Solvent                | CDCl <sub>3</sub>   |
| Temperature            | 28.0                |
| Pulse Sequence         | sgdd                |
| Number of Scans        | 12                  |
| Receiver Gain          | 28                  |
| Relaxation Delay       | 1.0000              |
| Pulse Width            | 0.0000              |
| Acquisition Date       | 2015-04-20T09:11:51 |
| Spectrometer Frequency | 300.03              |
| Spectral Width         | 5494.5              |
| Lowest Frequency       | -74.1               |
| Nucleus                | <sup>1</sup> H      |
| Acquired Size          | 10365               |
| Spectral Size          | 3268                |

Supplementary Figure 77. <sup>1</sup>H NMR Spectrum of **3h**.

crf-4-45-C-CDCl<sub>3</sub>

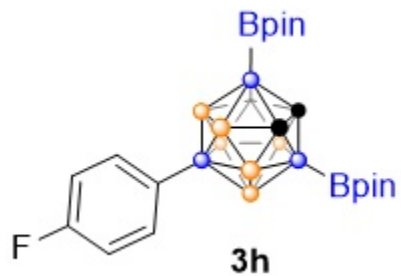

164.511  
161.268

134.247  
134.150

114.340  
114.079

84.494  
77.732  
77.308  
76.884

56.652  
52.267

25.096

| Parameter              | Value                 |
|------------------------|-----------------------|
| Title                  | crf-4-45-C-0420       |
| Comment                | 13C OBSERVE           |
| Origin                 | Varian                |
| Owner                  |                       |
| Site                   |                       |
| Spectrometer           | mercury               |
| Author                 | omc                   |
| Solvent                | CDCl <sub>3</sub>     |
| Temperature            | 28.0                  |
| Pulse Sequence         | zgpg30                |
| Number of Scans        | 200                   |
| Receiver Gain          | 34                    |
| Relaxation Delay       | 1.0000                |
| Pulse Width            | 0.0000                |
| Acquisition Date       | 2015-04-20 11: 28: 56 |
| Spectrometer Frequency | 75.45                 |
| Spectral Width         | 18367.0               |
| Lowest Frequency       | -1627.8               |
| Nucleus                | 13C                   |
| Acquired Size          | 28155                 |
| Spectral Size          | 65536                 |

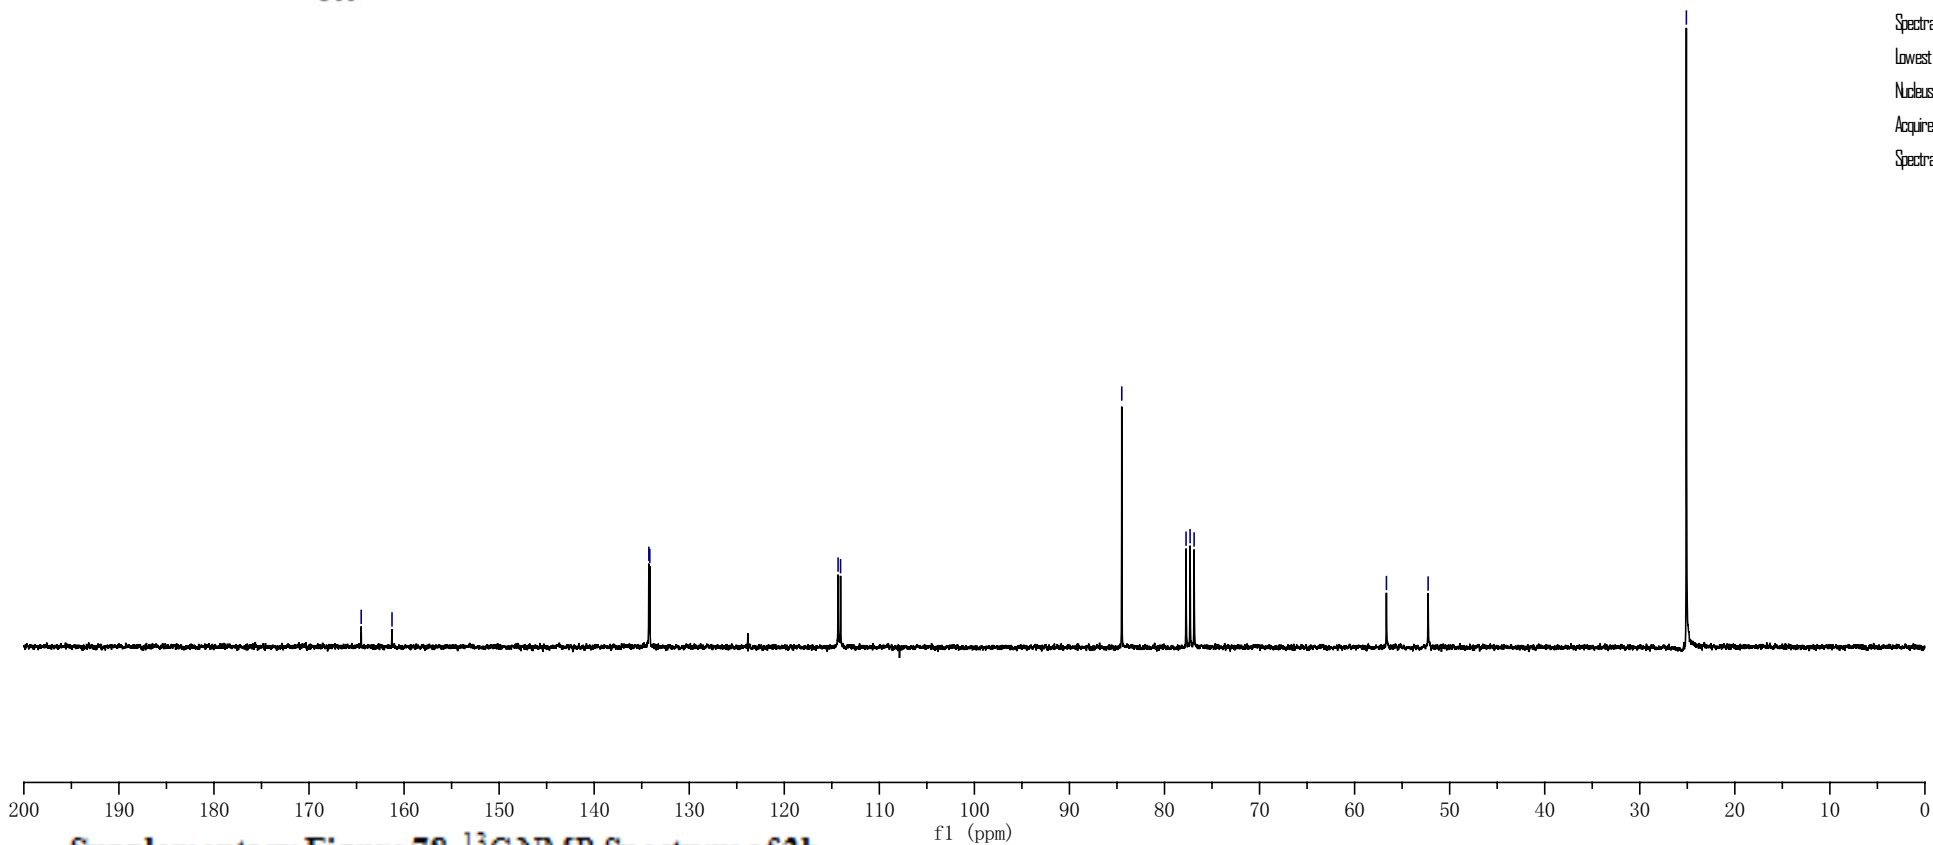

Supplementary Figure 78. <sup>13</sup>C NMR Spectrum of **3h**.

crf-4-45-B-decoupling-CDCl<sub>3</sub>

| Parameter              | Value                                        |
|------------------------|----------------------------------------------|
| Data File Name         | C:/Users/Administrator/Desktop/b-cr-4-45/fid |
| Title                  | Desktop                                      |
| Comment                |                                              |
| Origin                 | UNMR Bruker Analytische Messtechnik GmbH     |
| Owner                  | root                                         |
| Site                   |                                              |
| Spectrometer           | dmx400                                       |
| Author                 |                                              |
| Solvent                | DMSO                                         |
| Temperature            | 300.0                                        |
| Pulse Sequence         | aring-1gy                                    |
| Number of Scans        | 800                                          |
| Receiver Gain          | 32                                           |
| Relaxation Delay       | 0.0000                                       |
| Pulse Width            | 13.4000                                      |
| Acquisition Time       | 0.3195                                       |
| Acquisition Date       | 2015-04-20T13:13:06                          |
| Modification Date      | 2015-04-20T13:13:00                          |
| Spectrometer Frequency | 128.38                                       |
| Spectral Width         | 51281                                        |
| Lowest Frequency       | -47300.9                                     |
| Nucleus                | 11B                                          |
| Acquired Size          | 16384                                        |
| Spectral Size          | 3288                                         |

32.544

8.924

0.282

-6.018

-11.871

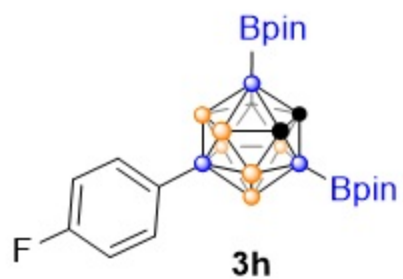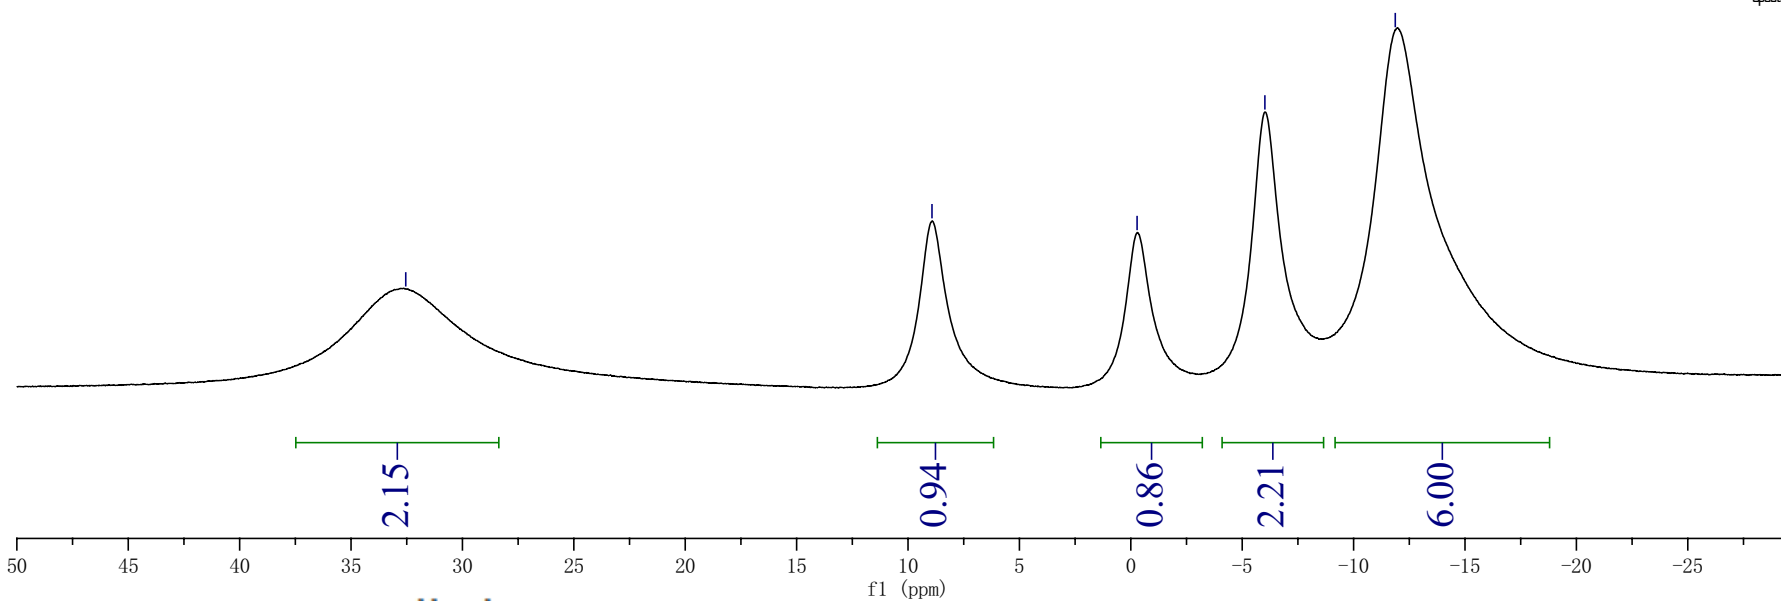

Supplementary Figure 79. <sup>11</sup>B {<sup>1</sup>H} NMR Spectrum of 3h.

S100

crf-4-45-B-coupling-CDCl<sub>3</sub>

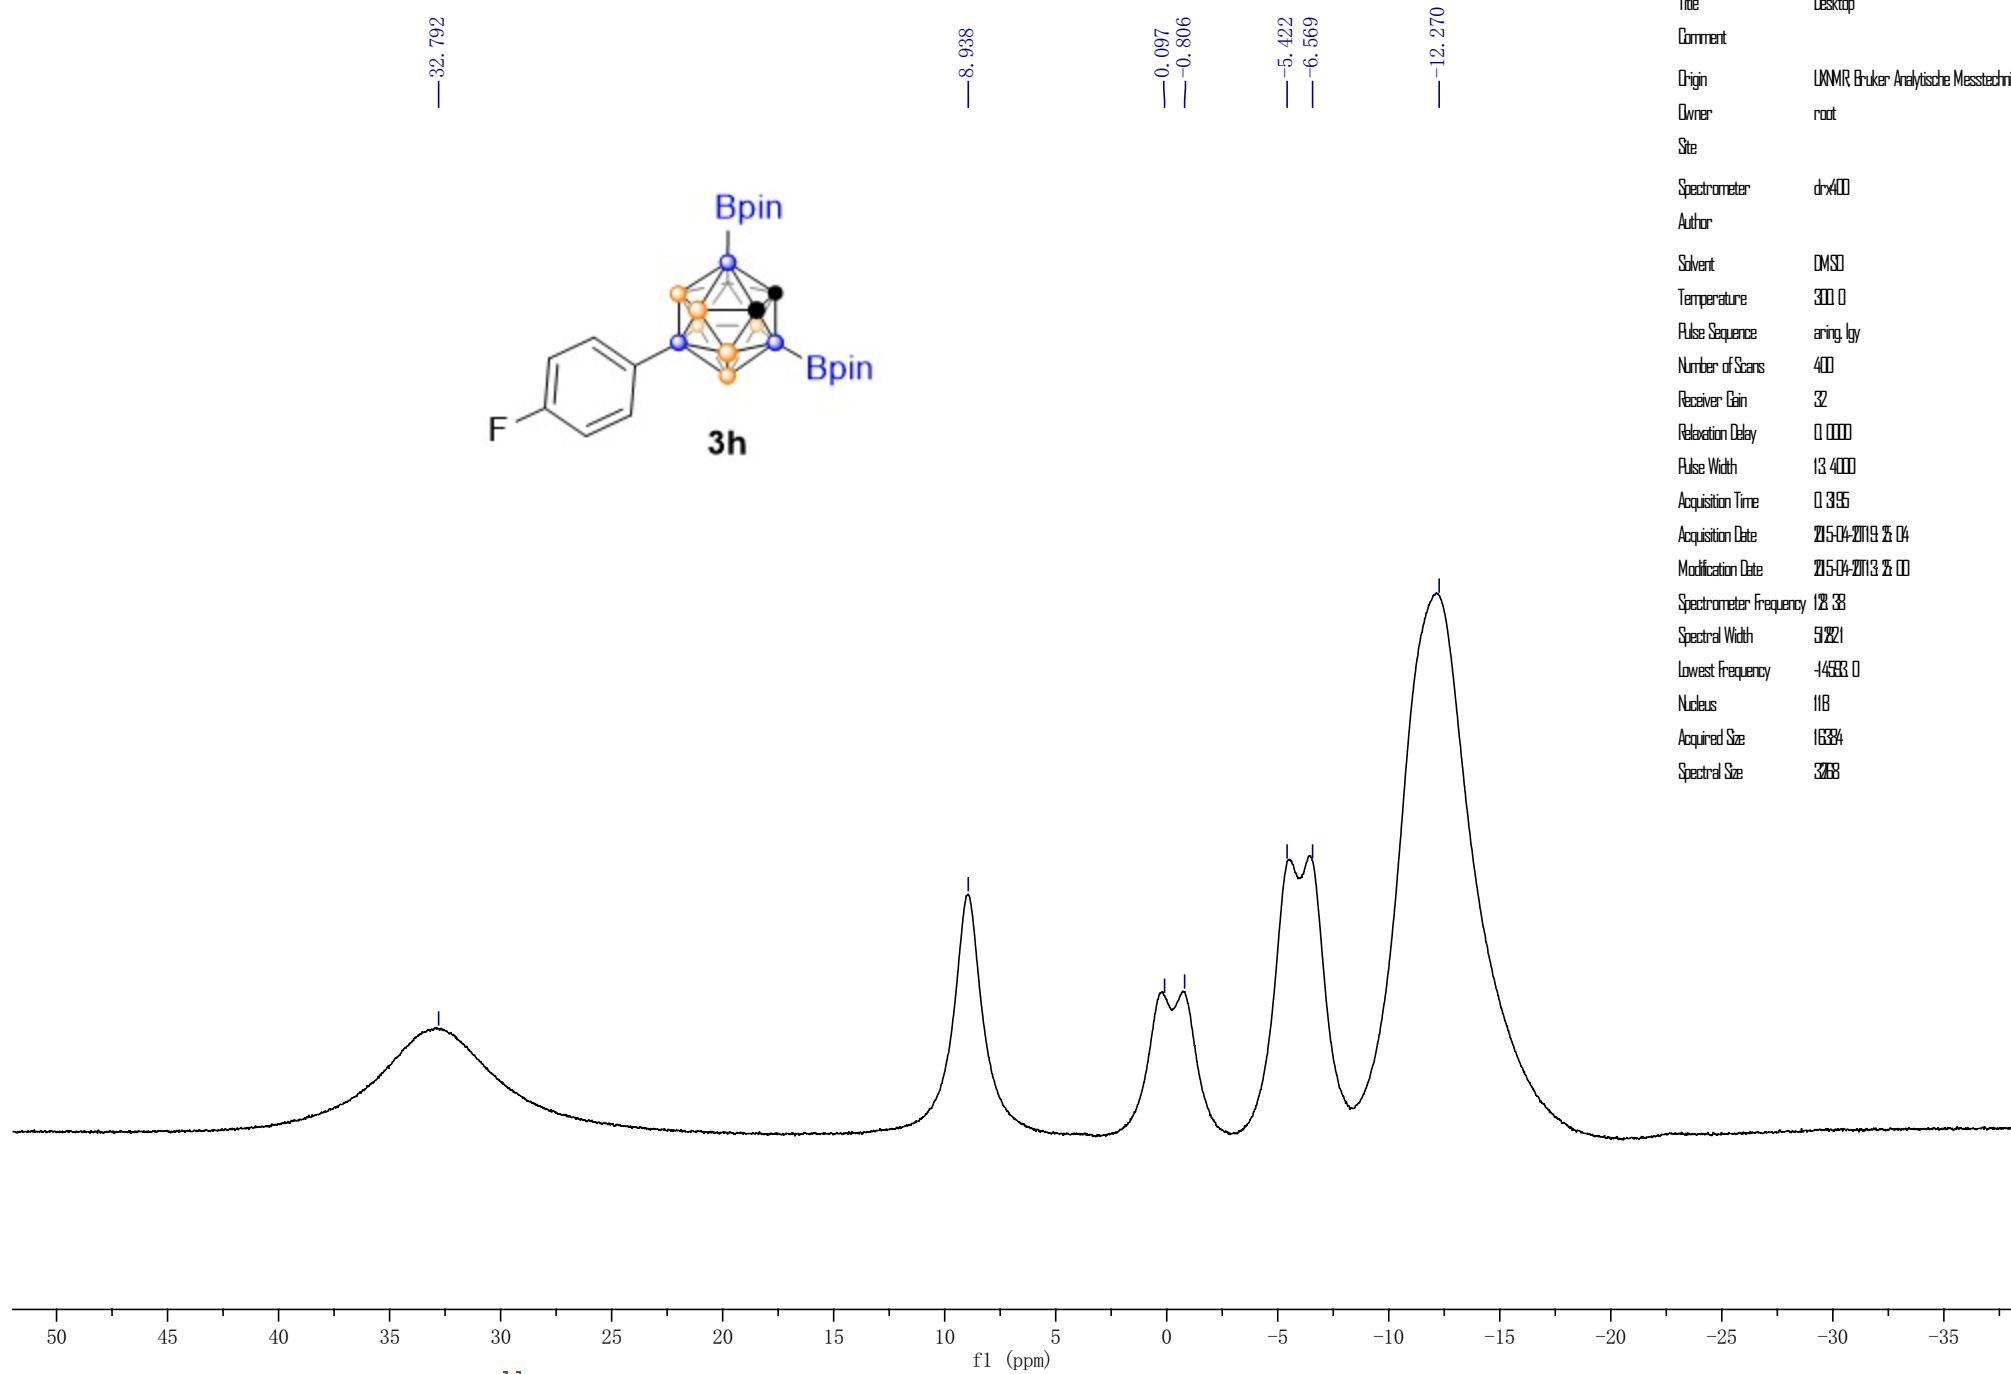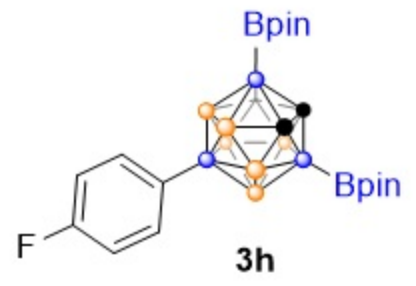

| Parameter              | Value                                                |
|------------------------|------------------------------------------------------|
| Data File Name         | C:/Users/Administrator/Desktop/b-cr4-45-coupling/fid |
| Title                  | Desktop                                              |
| Comment                |                                                      |
| Origin                 | UNMR Bruker Analytische Messtechnik GmbH             |
| Owner                  | root                                                 |
| Site                   |                                                      |
| Spectrometer           | dmx400                                               |
| Author                 |                                                      |
| Solvent                | DMSO                                                 |
| Temperature            | 300.0                                                |
| Pulse Sequence         | aring.ty                                             |
| Number of Scans        | 400                                                  |
| Receiver Gain          | 32                                                   |
| Relaxation Delay       | 0.0000                                               |
| Pulse Width            | 13.4000                                              |
| Acquisition Time       | 0.355                                                |
| Acquisition Date       | 2015-04-20 19:25:04                                  |
| Modification Date      | 2015-04-20 13:25:00                                  |
| Spectrometer Frequency | 128.38                                               |
| Spectral Width         | 51.821                                               |
| Lowest Frequency       | -145883.0                                            |
| Nucleus                | 11B                                                  |
| Acquired Size          | 16384                                                |
| Spectral Size          | 3268                                                 |

Supplementary Figure 80. <sup>11</sup>B NMR Spectrum of **3h**.

crf-4-45-F-CDCl<sub>3</sub>

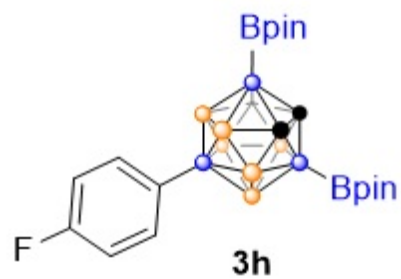

-116.652  
-116.669  
-116.677  
-116.693  
-116.710  
-116.718  
-116.734

| Parameter              | Value                    |
|------------------------|--------------------------|
| Title                  | 21353-07-4-45_FLUORINE_0 |
| Comment                | 21353-07-4-45            |
| Origin                 | Varian                   |
| Owner                  |                          |
| Site                   |                          |
| Spectrometer           | vnmrs                    |
| Author                 |                          |
| Solvent                | cdcl3                    |
| Temperature            | 25.0                     |
| Pulse Sequence         | zgpg30                   |
| Number of Scans        | 16                       |
| Receiver Gain          | 56                       |
| Relaxation Delay       | 1.0000                   |
| Pulse Width            | 0.0000                   |
| Acquisition Date       | 21-03-2022 4: 00         |
| Spectrometer Frequency | 376.06                   |
| Spectral Width         | 8826.7                   |
| Lowest Frequency       | -7691.4                  |
| Nucleus                | 19F                      |
| Acquired Size          | 65536                    |
| Spectral Size          | 13102                    |

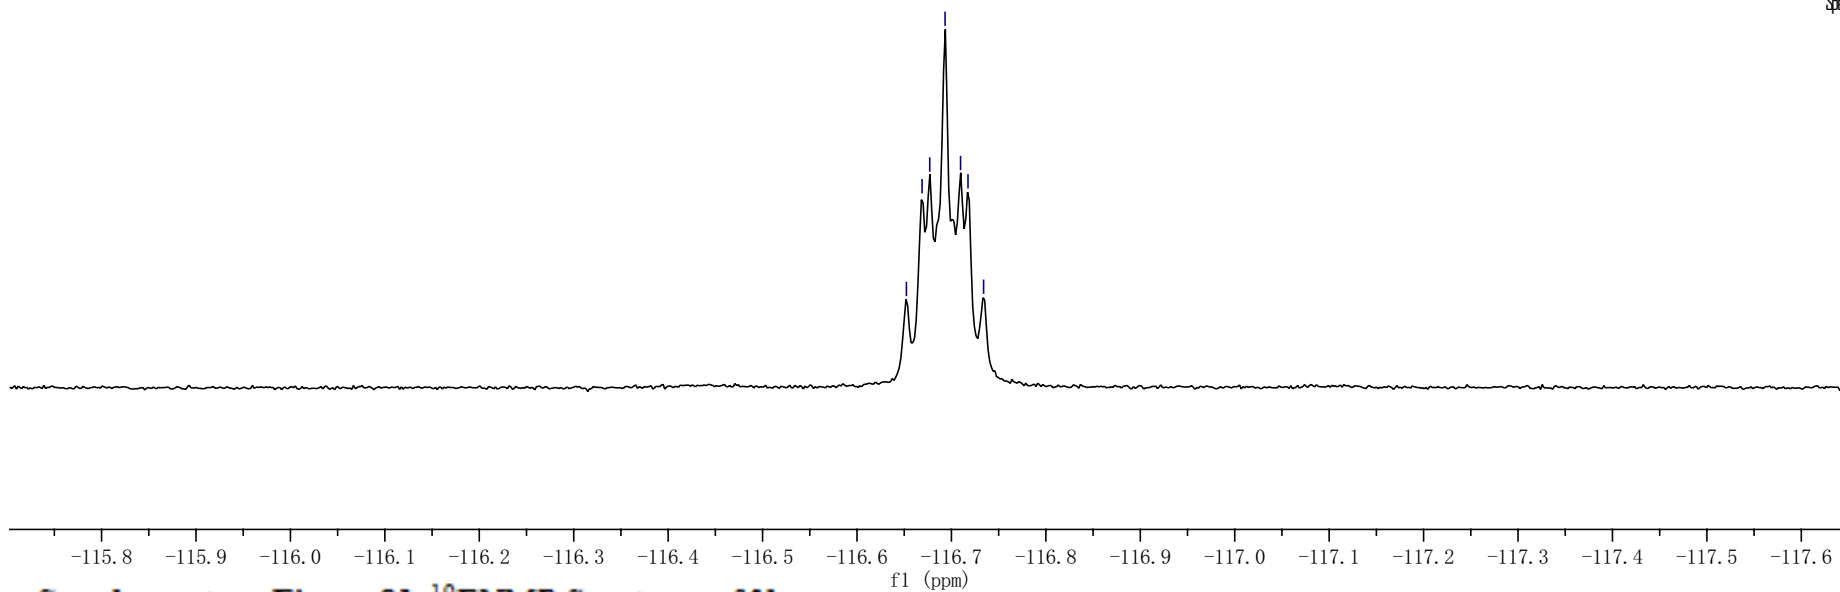

Supplementary Figure 81. <sup>19</sup>F NMR Spectrum of 3h.

crf-4-33-H-CDCl<sub>3</sub>

7.306  
7.280  
7.255  
7.160  
7.135

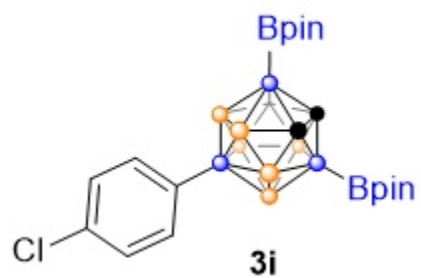

3.645  
3.545

1.271

| Parameter              | Value               |
|------------------------|---------------------|
| Title                  | crf-4-33            |
| Comment                | STANDARD OBSERVE    |
| Origin                 | Varian              |
| Owner                  |                     |
| Site                   |                     |
| Spectrometer           | mercury             |
| Author                 | omc                 |
| Solvent                | CDCl <sub>3</sub>   |
| Temperature            | 28.0                |
| Pulse Sequence         | sgpd                |
| Number of Scans        | 8                   |
| Receiver Gain          | 28                  |
| Relaxation Delay       | 1.0000              |
| Pulse Width            | 0.0000              |
| Acquisition Date       | 2015-04-10 09:58:28 |
| Spectrometer Frequency | 300.03              |
| Spectral Width         | 5494.5              |
| Lowest Frequency       | -71.1               |
| Nucleus                | <sup>1</sup> H      |
| Acquired Size          | 10976               |
| Spectral Size          | 3068                |

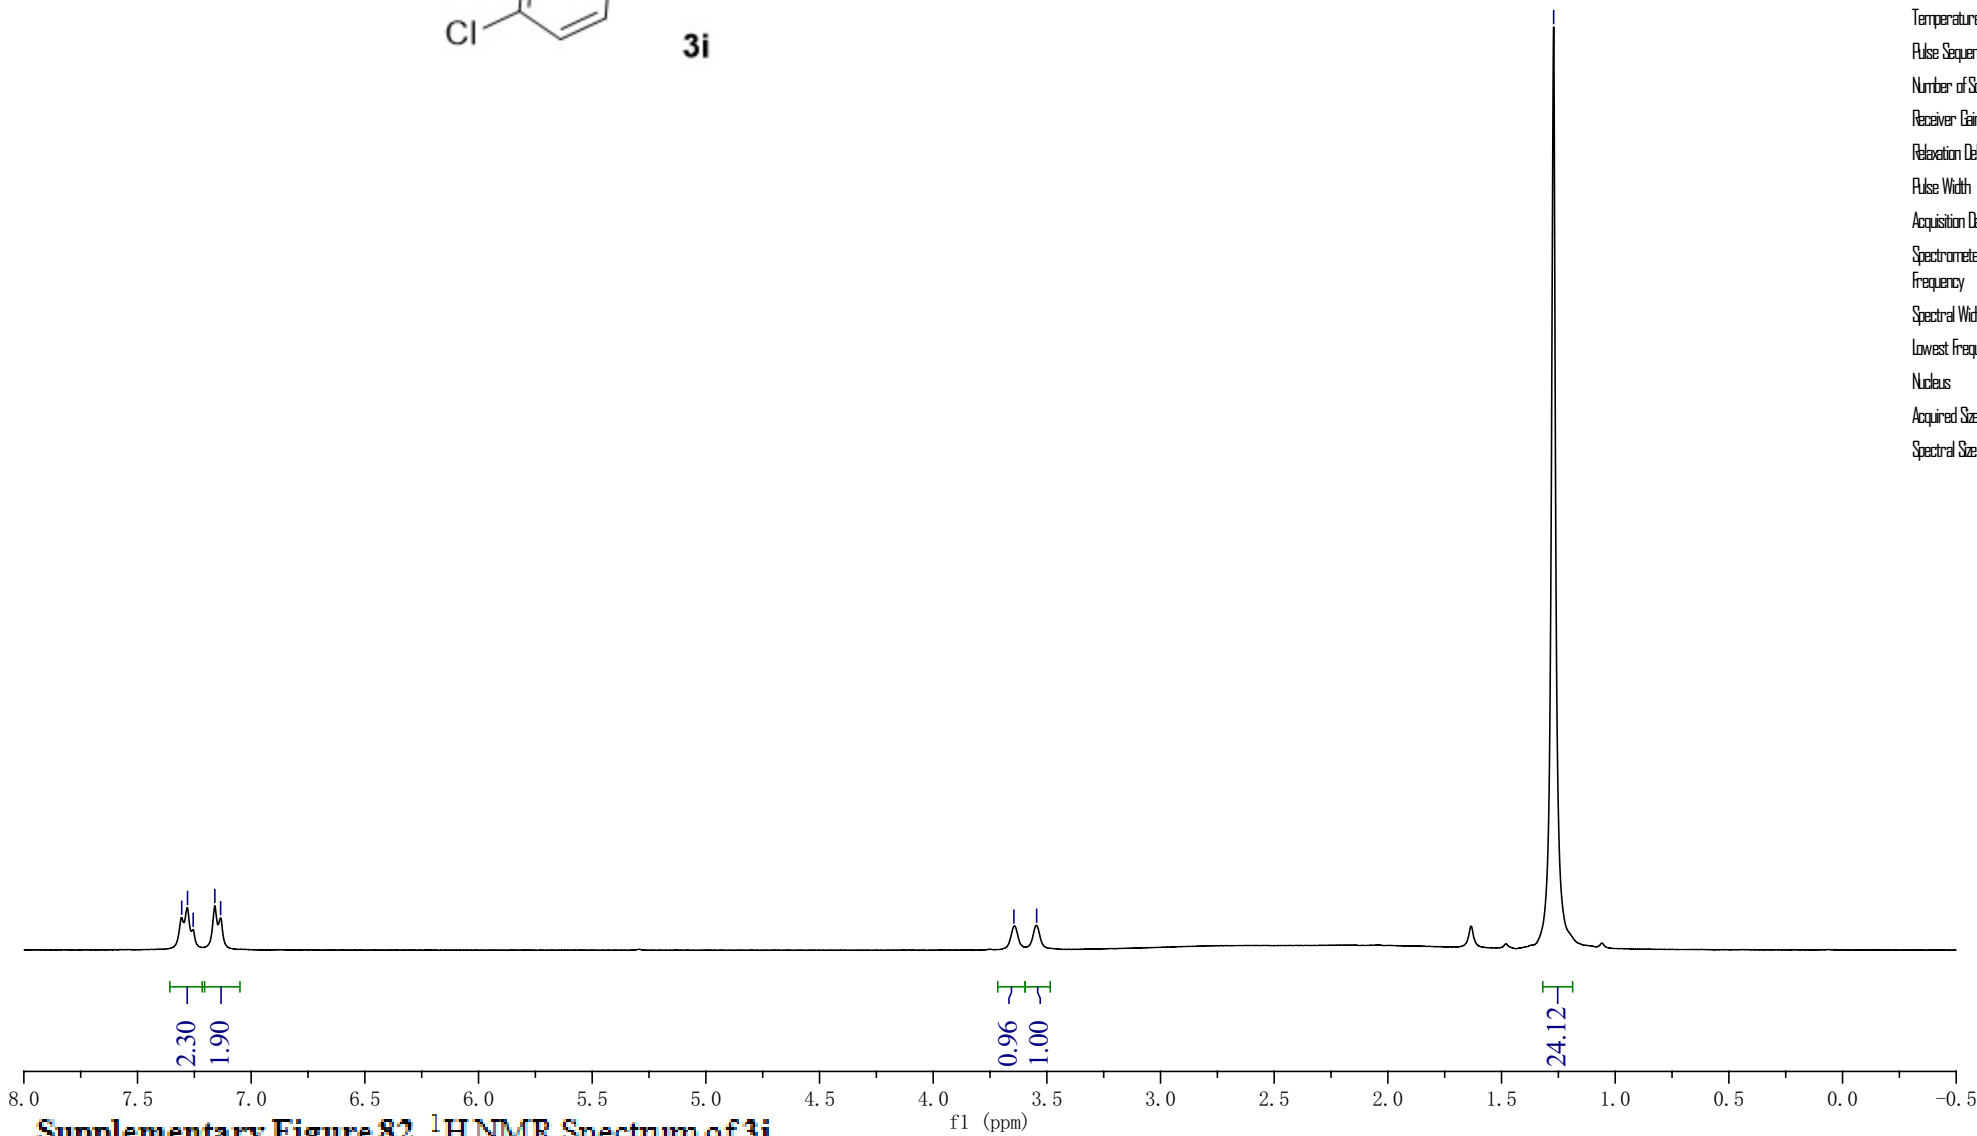

Supplementary Figure 82. <sup>1</sup>H NMR Spectrum of **3i**.

crf-4-33-H-CDCl<sub>3</sub>

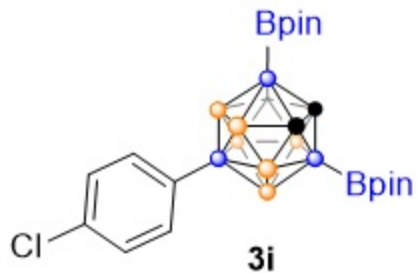

134.009  
133.362  
127.490

84.501  
77.711  
77.289  
76.864

56.692  
52.506

25.100

| Parameter              | Value               |
|------------------------|---------------------|
| Title                  | crf-4-33-C          |
| Comment                | 13C OBSERVE         |
| Origin                 | Varian              |
| Owner                  |                     |
| Site                   |                     |
| Spectrometer           | mercury             |
| Author                 | omc                 |
| Solvent                | CDCl <sub>3</sub>   |
| Temperature            | 21.0                |
| Pulse Sequence         | sgpul               |
| Number of Scans        | 28                  |
| Receiver Gain          | 34                  |
| Relaxation Delay       | 1.0000              |
| Pulse Width            | 0.0000              |
| Acquisition Date       | 2015-04-10T12:01:33 |
| Spectrometer Frequency | 76.45               |
| Spectral Width         | 18897.0             |
| Lowest Frequency       | -462.8              |
| Nucleus                | 13C                 |
| Acquired Size          | 2155                |
| Spectral Size          | 65536               |

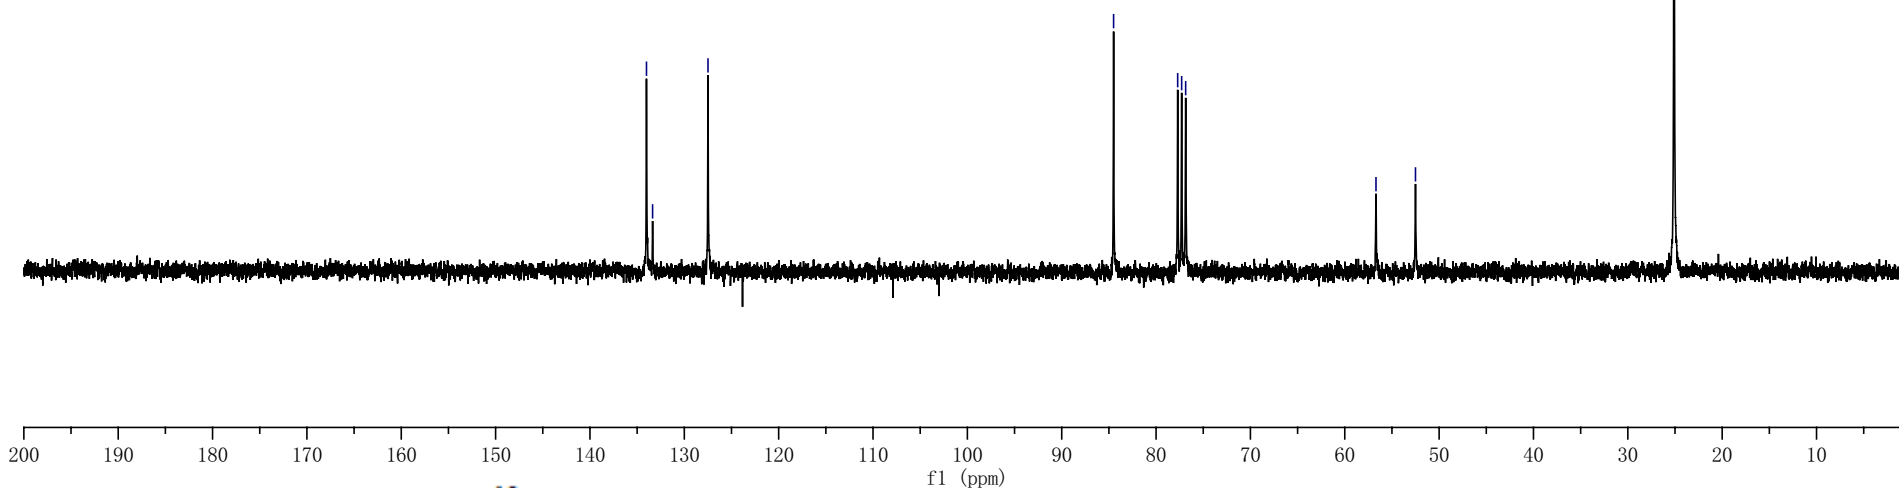

Supplementary Figure 83. <sup>13</sup>C NMR Spectrum of **3i**.



crf-4-33-B-decoupling-CDCl<sub>3</sub>

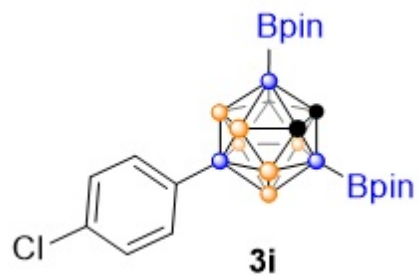

| Parameter              | Value                                      |
|------------------------|--------------------------------------------|
| Data File Name         | C:/Users/Administrator/Desktop/bcrf4-33/td |
| Title                  | Desktop                                    |
| Comment                |                                            |
| Origin                 | LNMNR Bruker Analytische Messtechnik GmbH  |
| Owner                  | root                                       |
| Site                   |                                            |
| Spectrometer           | dx400                                      |
| Author                 |                                            |
| Solvent                | DMSO                                       |
| Temperature            | 300.0                                      |
| Pulse Sequence         | zing1gy                                    |
| Number of Scans        | 800                                        |
| Receiver Gain          | 32                                         |
| Relaxation Delay       | 0.0000                                     |
| Pulse Width            | 13.4000                                    |
| Acquisition Time       | 0.3155                                     |
| Acquisition Date       | 2015-04-01 19:44:54                        |
| Modification Date      | 2015-04-01 13:44:00                        |
| Spectrometer Frequency | 128.38                                     |
| Spectral Width         | 9.821                                      |
| Lowest Frequency       | -1792.9                                    |
| Nucleus                | 11B                                        |
| Acquired Size          | 16384                                      |
| Spectral Size          | 3268                                       |

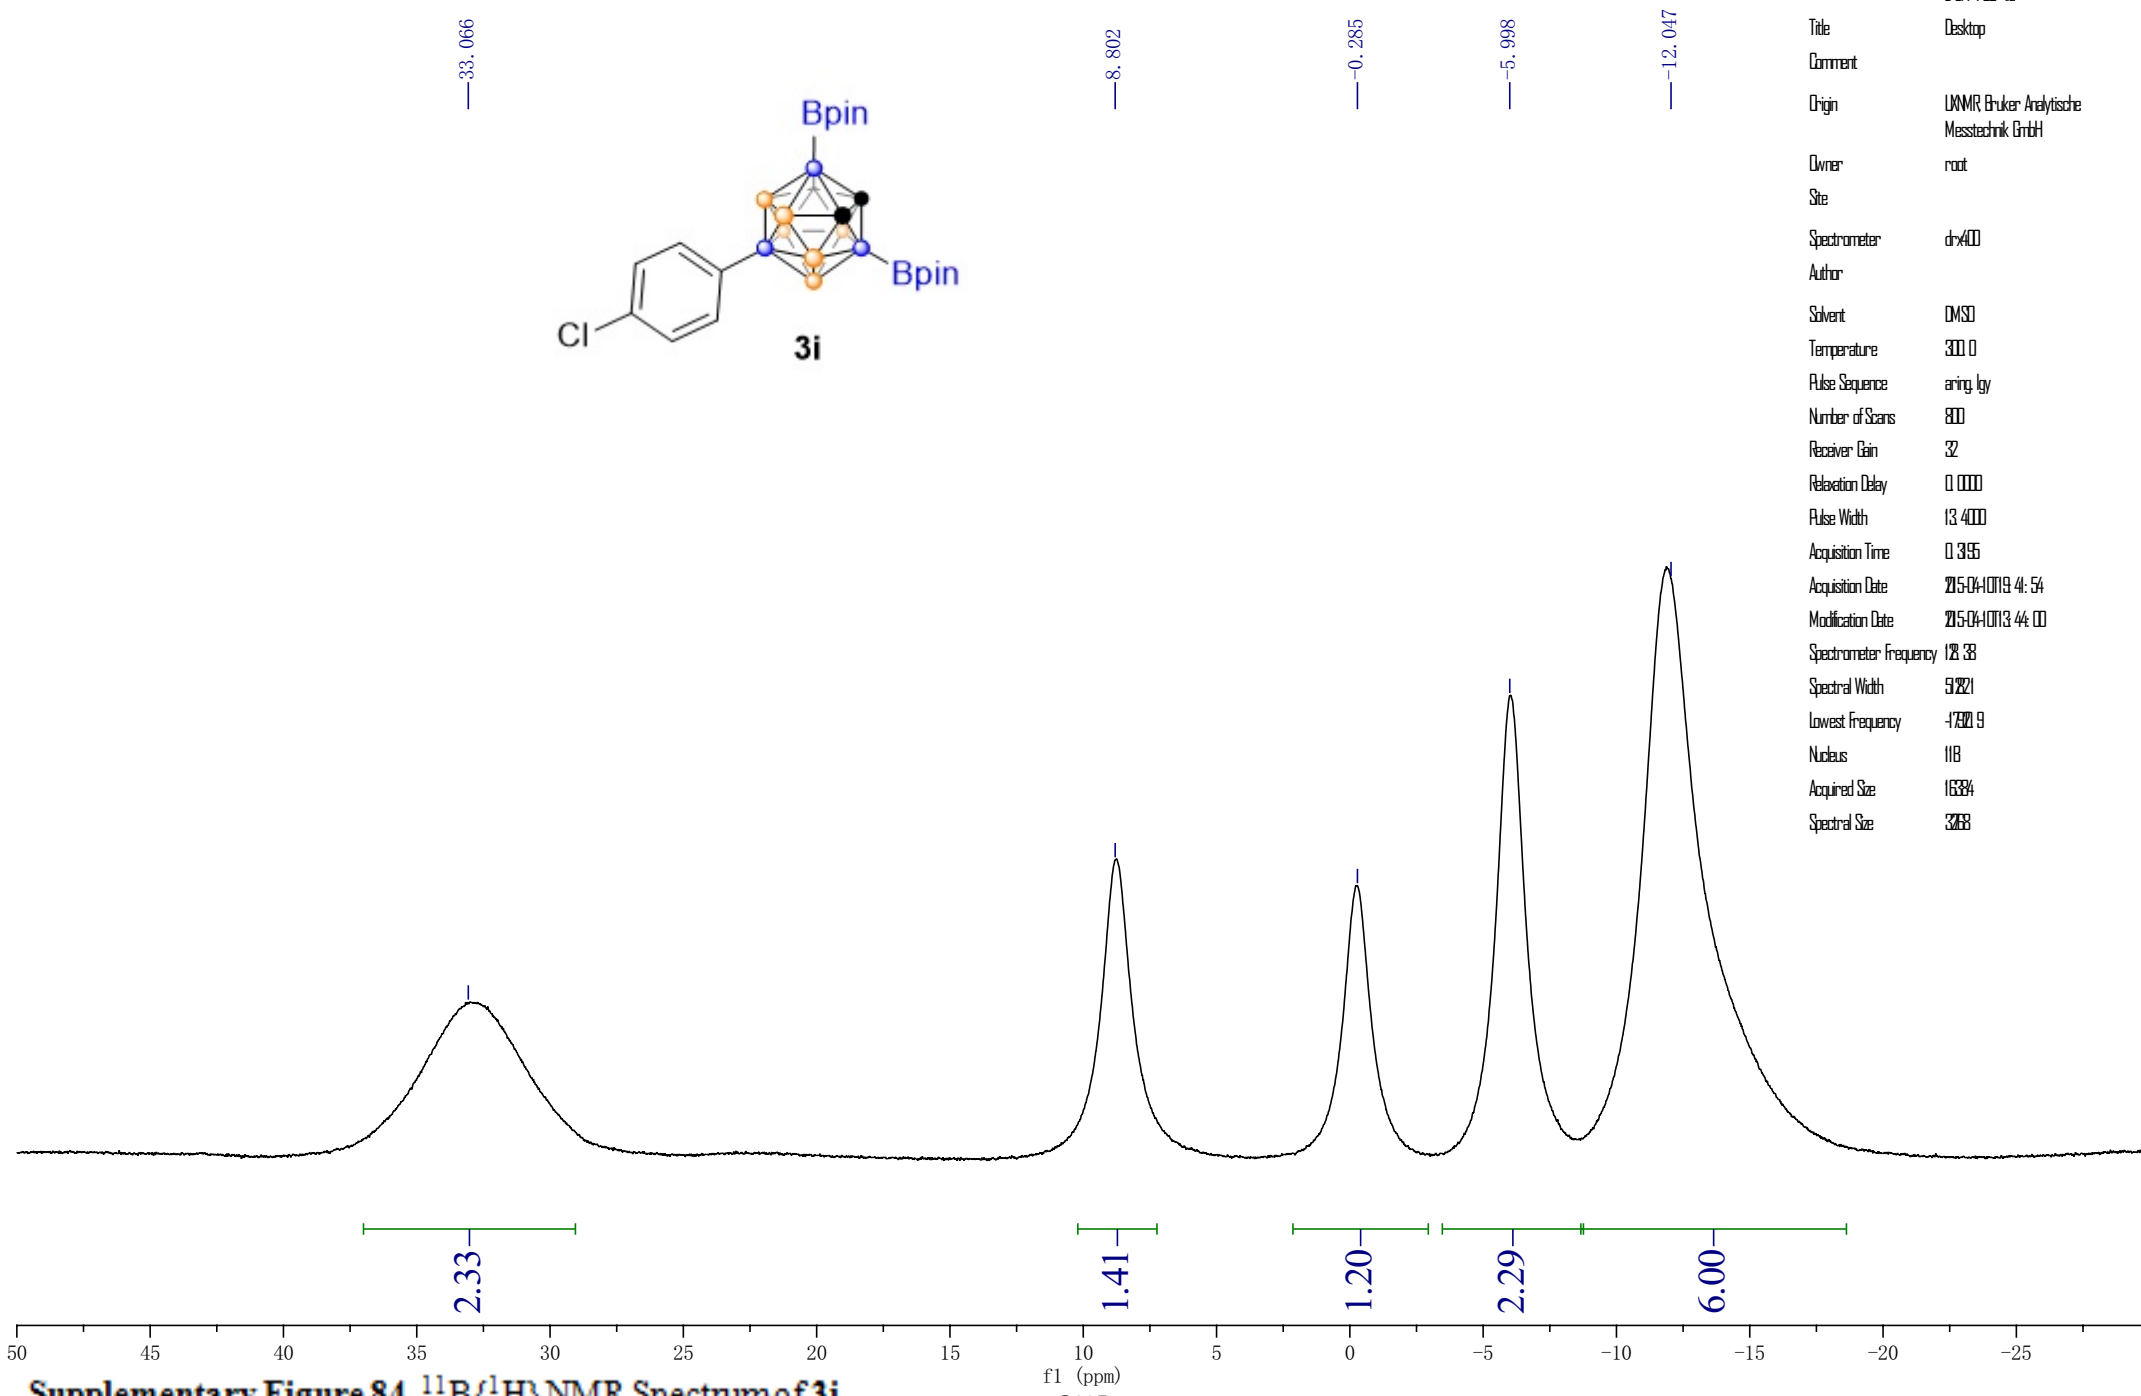

Supplementary Figure 84. <sup>11</sup>B{<sup>1</sup>H} NMR Spectrum of **3i**.

f1 (ppm)  
S105

crf-4-33-B-coupling-CDCl<sub>3</sub>

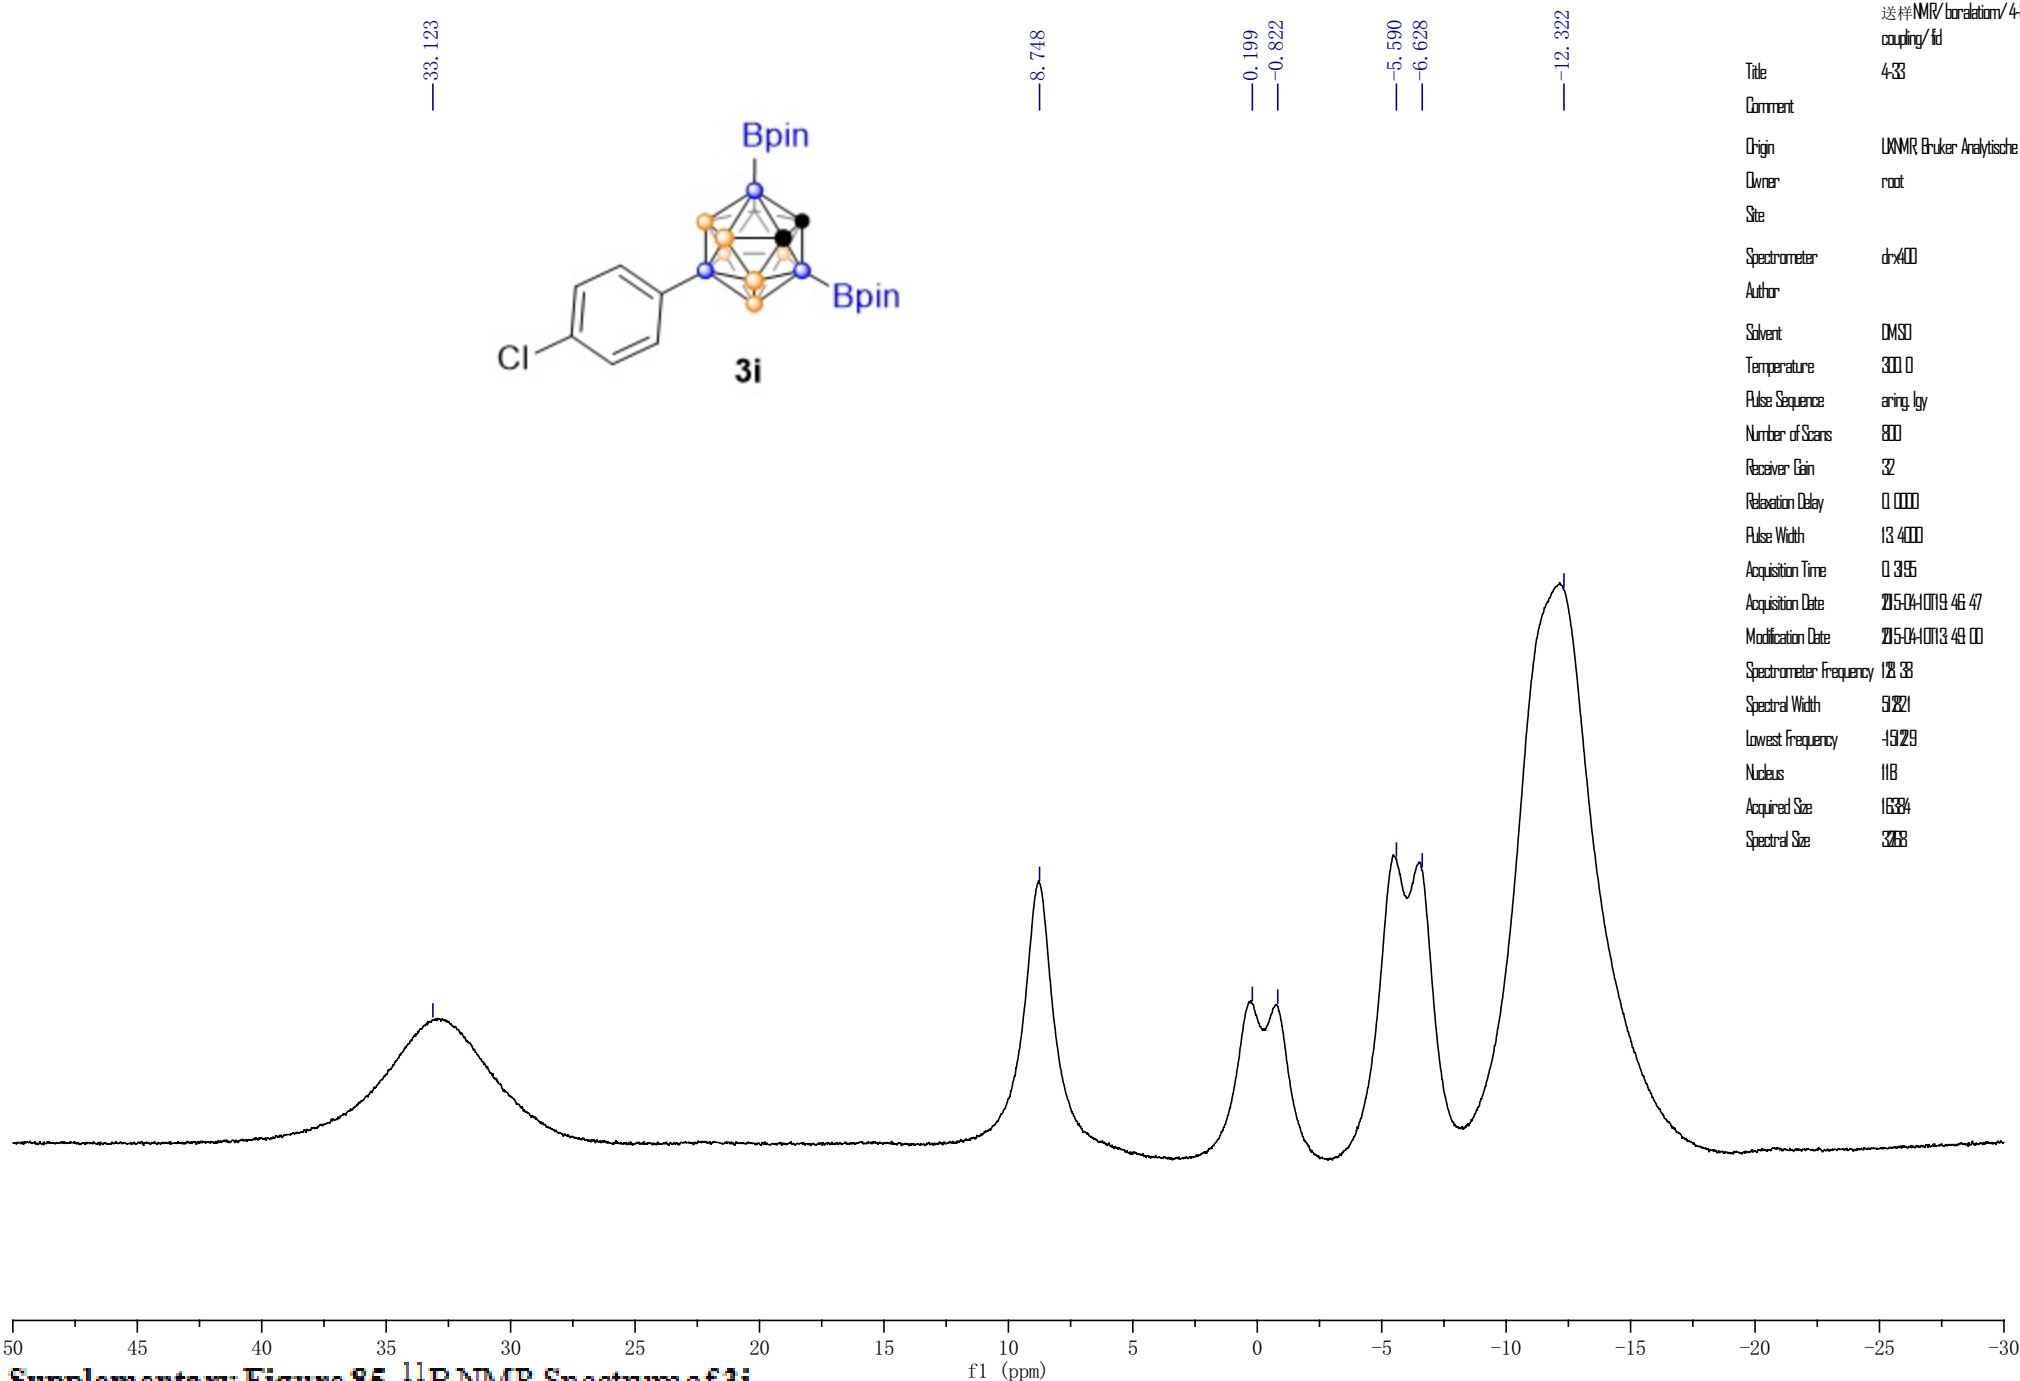

| Parameter              | Value                                                                            |
|------------------------|----------------------------------------------------------------------------------|
| Data File Name         | C:/Users/Administrator/Desktop/work/送样NMR/correlation/4-33/b-cr4-33-coupling.fid |
| Title                  | 4-33                                                                             |
| Comment                |                                                                                  |
| Origin                 | UNMR Bruker Analytische Messtechnik GmbH                                         |
| Owner                  | root                                                                             |
| Site                   |                                                                                  |
| Spectrometer           | dx400                                                                            |
| Author                 |                                                                                  |
| Solvent                | DMSO                                                                             |
| Temperature            | 300.0                                                                            |
| Pulse Sequence         | aring.ty                                                                         |
| Number of Scans        | 800                                                                              |
| Receiver Gain          | 32                                                                               |
| Relaxation Delay       | 0.0000                                                                           |
| Pulse Width            | 13.4000                                                                          |
| Acquisition Time       | 0.3955                                                                           |
| Acquisition Date       | 2015-04-01 19:46:47                                                              |
| Modification Date      | 2015-04-01 13:49:00                                                              |
| Spectrometer Frequency | 128.38                                                                           |
| Spectral Width         | 59.221                                                                           |
| Lowest Frequency       | -19.219                                                                          |
| Nucleus                | 11B                                                                              |
| Acquired Size          | 16384                                                                            |
| Spectral Size          | 3268                                                                             |

Supplementary Figure 85. <sup>11</sup>B NMR Spectrum of **3i**.

crf-4-46-H-CDCl<sub>3</sub>

7.500  
7.475  
7.436  
7.410  
7.260

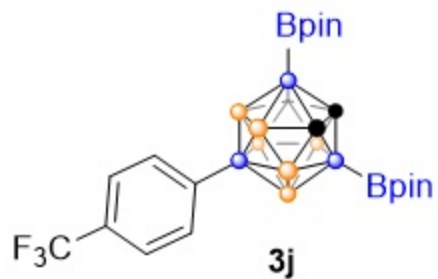

3.675  
3.582

1.281

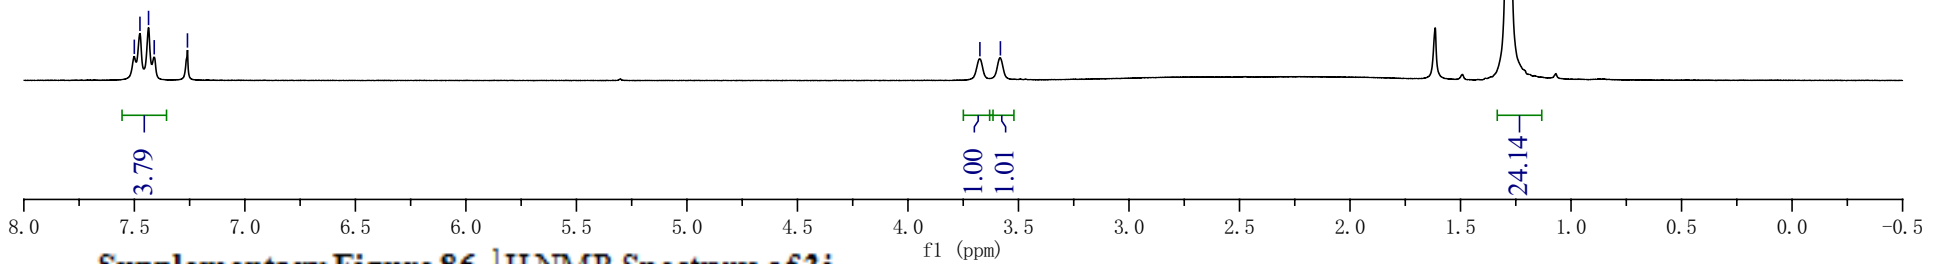

| Parameter              | Value               |
|------------------------|---------------------|
| Title                  | crf4-46H            |
| Comment                | STANDARD 1H OBSERVE |
| Origin                 | Varian              |
| Owner                  |                     |
| Site                   |                     |
| Spectrometer           | mercury             |
| Author                 | omc                 |
| Solvent                | CDCl3               |
| Temperature            | 20.0                |
| Pulse Sequence         | sZul                |
| Number of Scans        | 12                  |
| Receiver Gain          | 34                  |
| Relaxation Delay       | 1.0000              |
| Pulse Width            | 0.0000              |
| Acquisition Date       | 2015-04-27 11:25:33 |
| Spectrometer Frequency | 300.03              |
| Spectral Width         | 5494.5              |
| Lowest Frequency       | -709.3              |
| Nucleus                | 1H                  |
| Acquired Size          | 10376               |
| Spectral Size          | 3268                |

Supplementary Figure 86. <sup>1</sup>H NMR Spectrum of **3j**.

crf-4-46-C-CDCl<sub>3</sub>

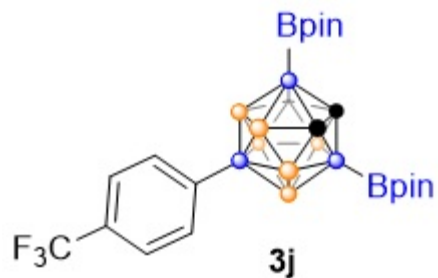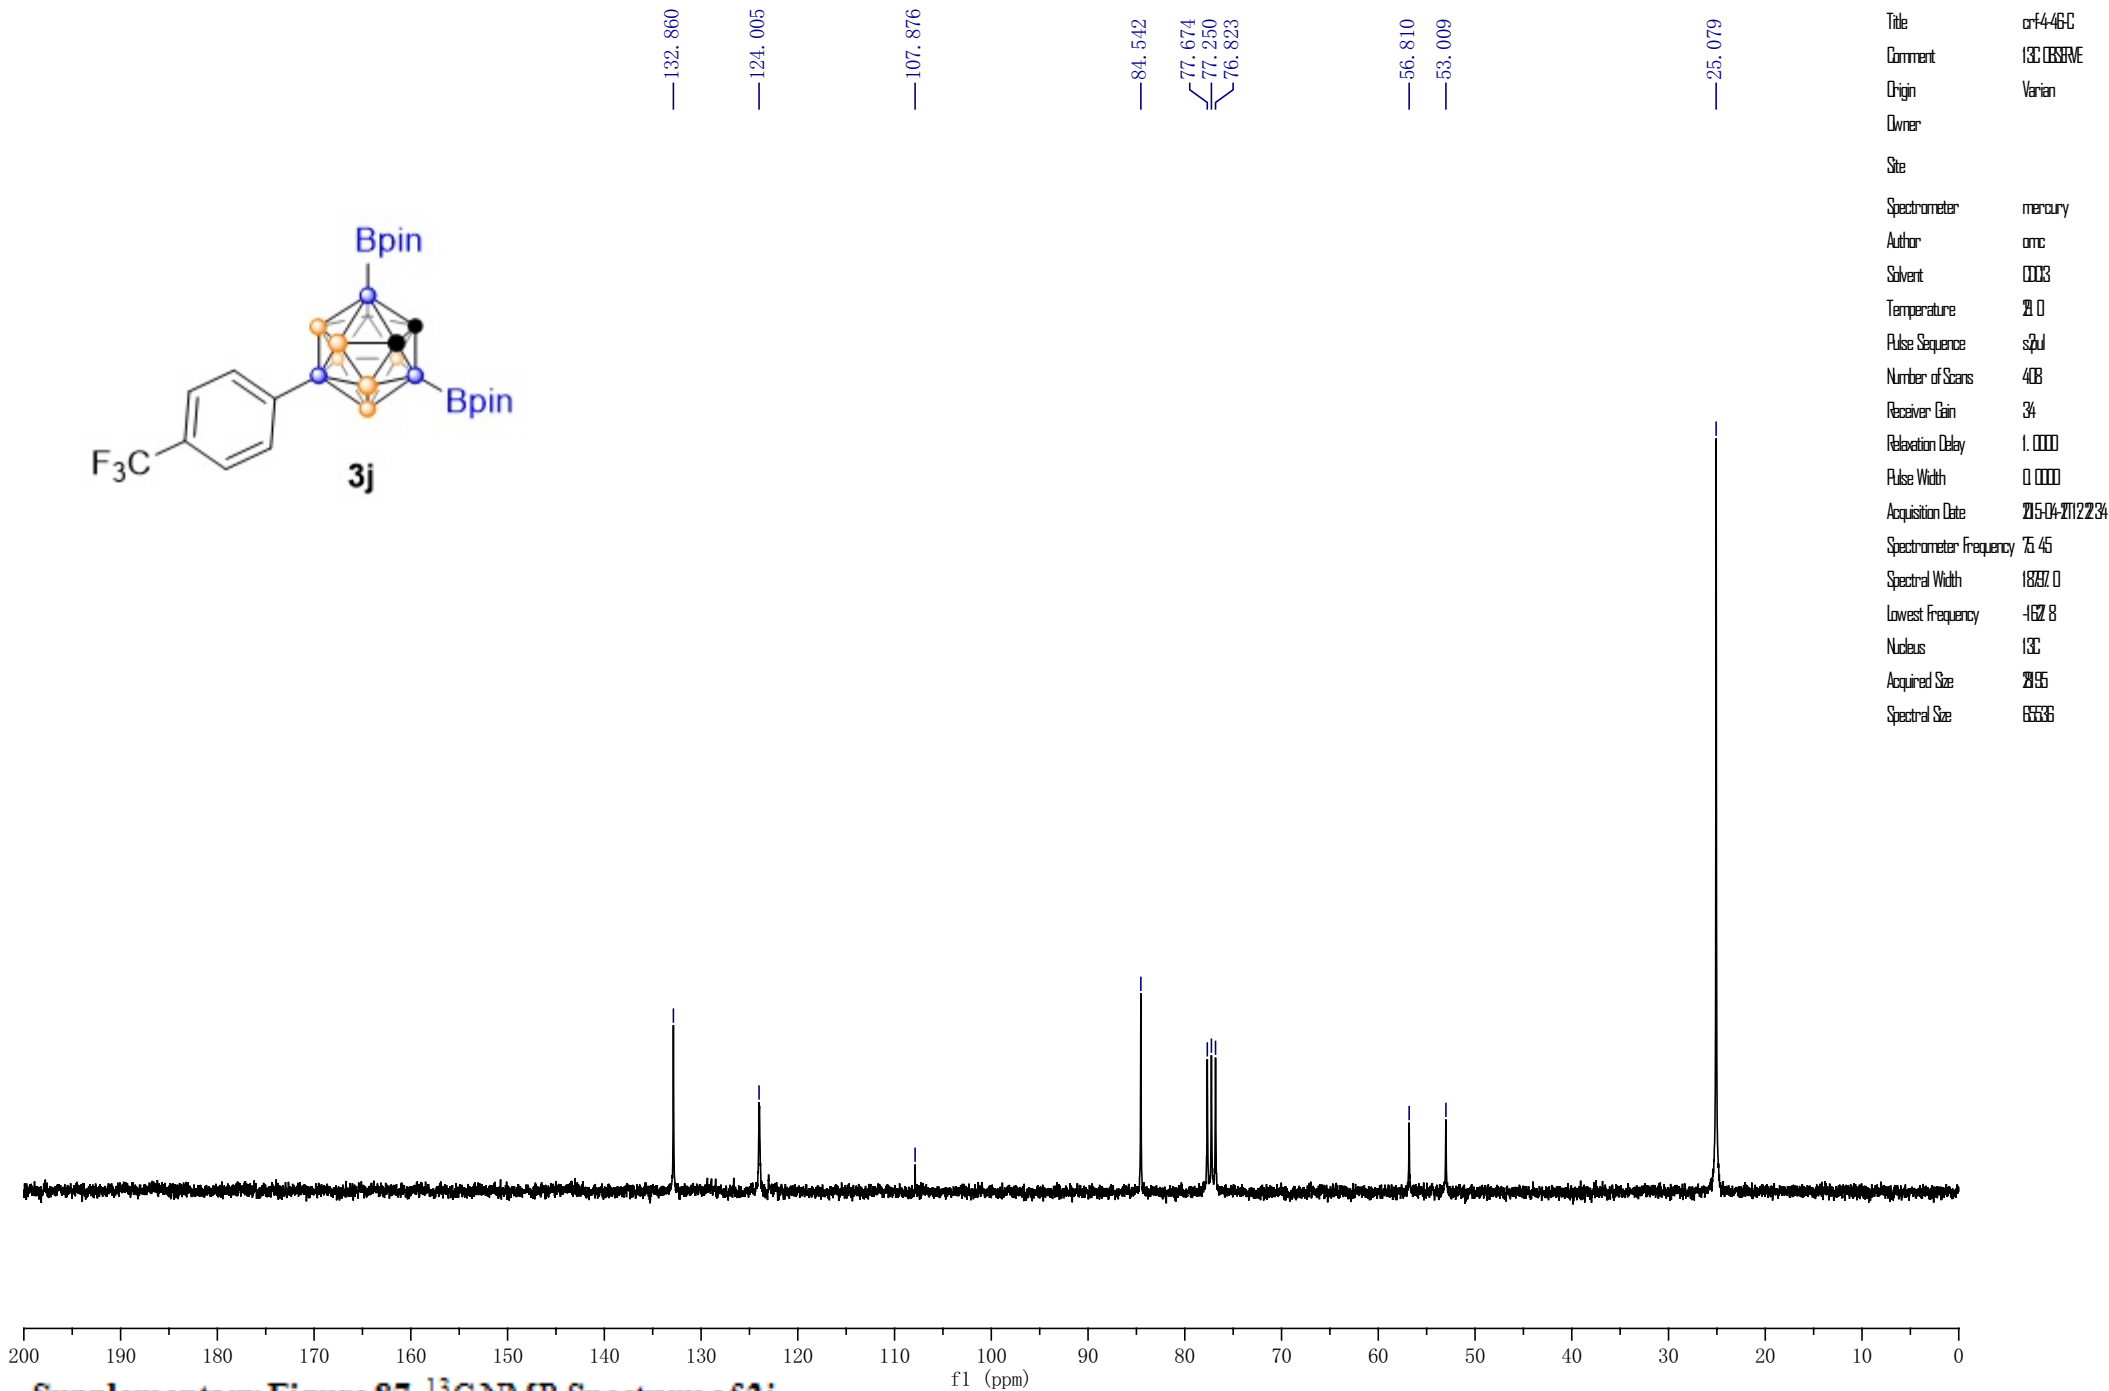

| Parameter              | Value               |
|------------------------|---------------------|
| Title                  | crf-4-46-C          |
| Comment                | 13C, EBSRME         |
| Origin                 | Varian              |
| Owner                  |                     |
| Site                   |                     |
| Spectrometer           | mercury             |
| Author                 | omc                 |
| Solvent                | CDCl <sub>3</sub>   |
| Temperature            | 21.0                |
| Pulse Sequence         | sgpul               |
| Number of Scans        | 408                 |
| Receiver Gain          | 34                  |
| Relaxation Delay       | 1.0000              |
| Pulse Width            | 0.0000              |
| Acquisition Date       | 2015-04-20 12:23:34 |
| Spectrometer Frequency | 76.45               |
| Spectral Width         | 18897.0             |
| Lowest Frequency       | -162.8              |
| Nucleus                | 13C                 |
| Acquired Size          | 2955                |
| Spectral Size          | 65536               |

Supplementary Figure 87. <sup>13</sup>C NMR Spectrum of **3j**.

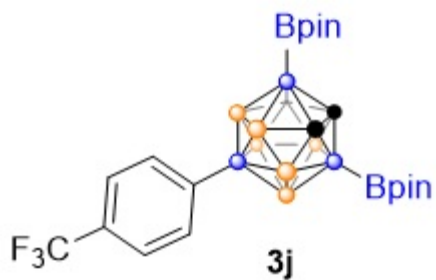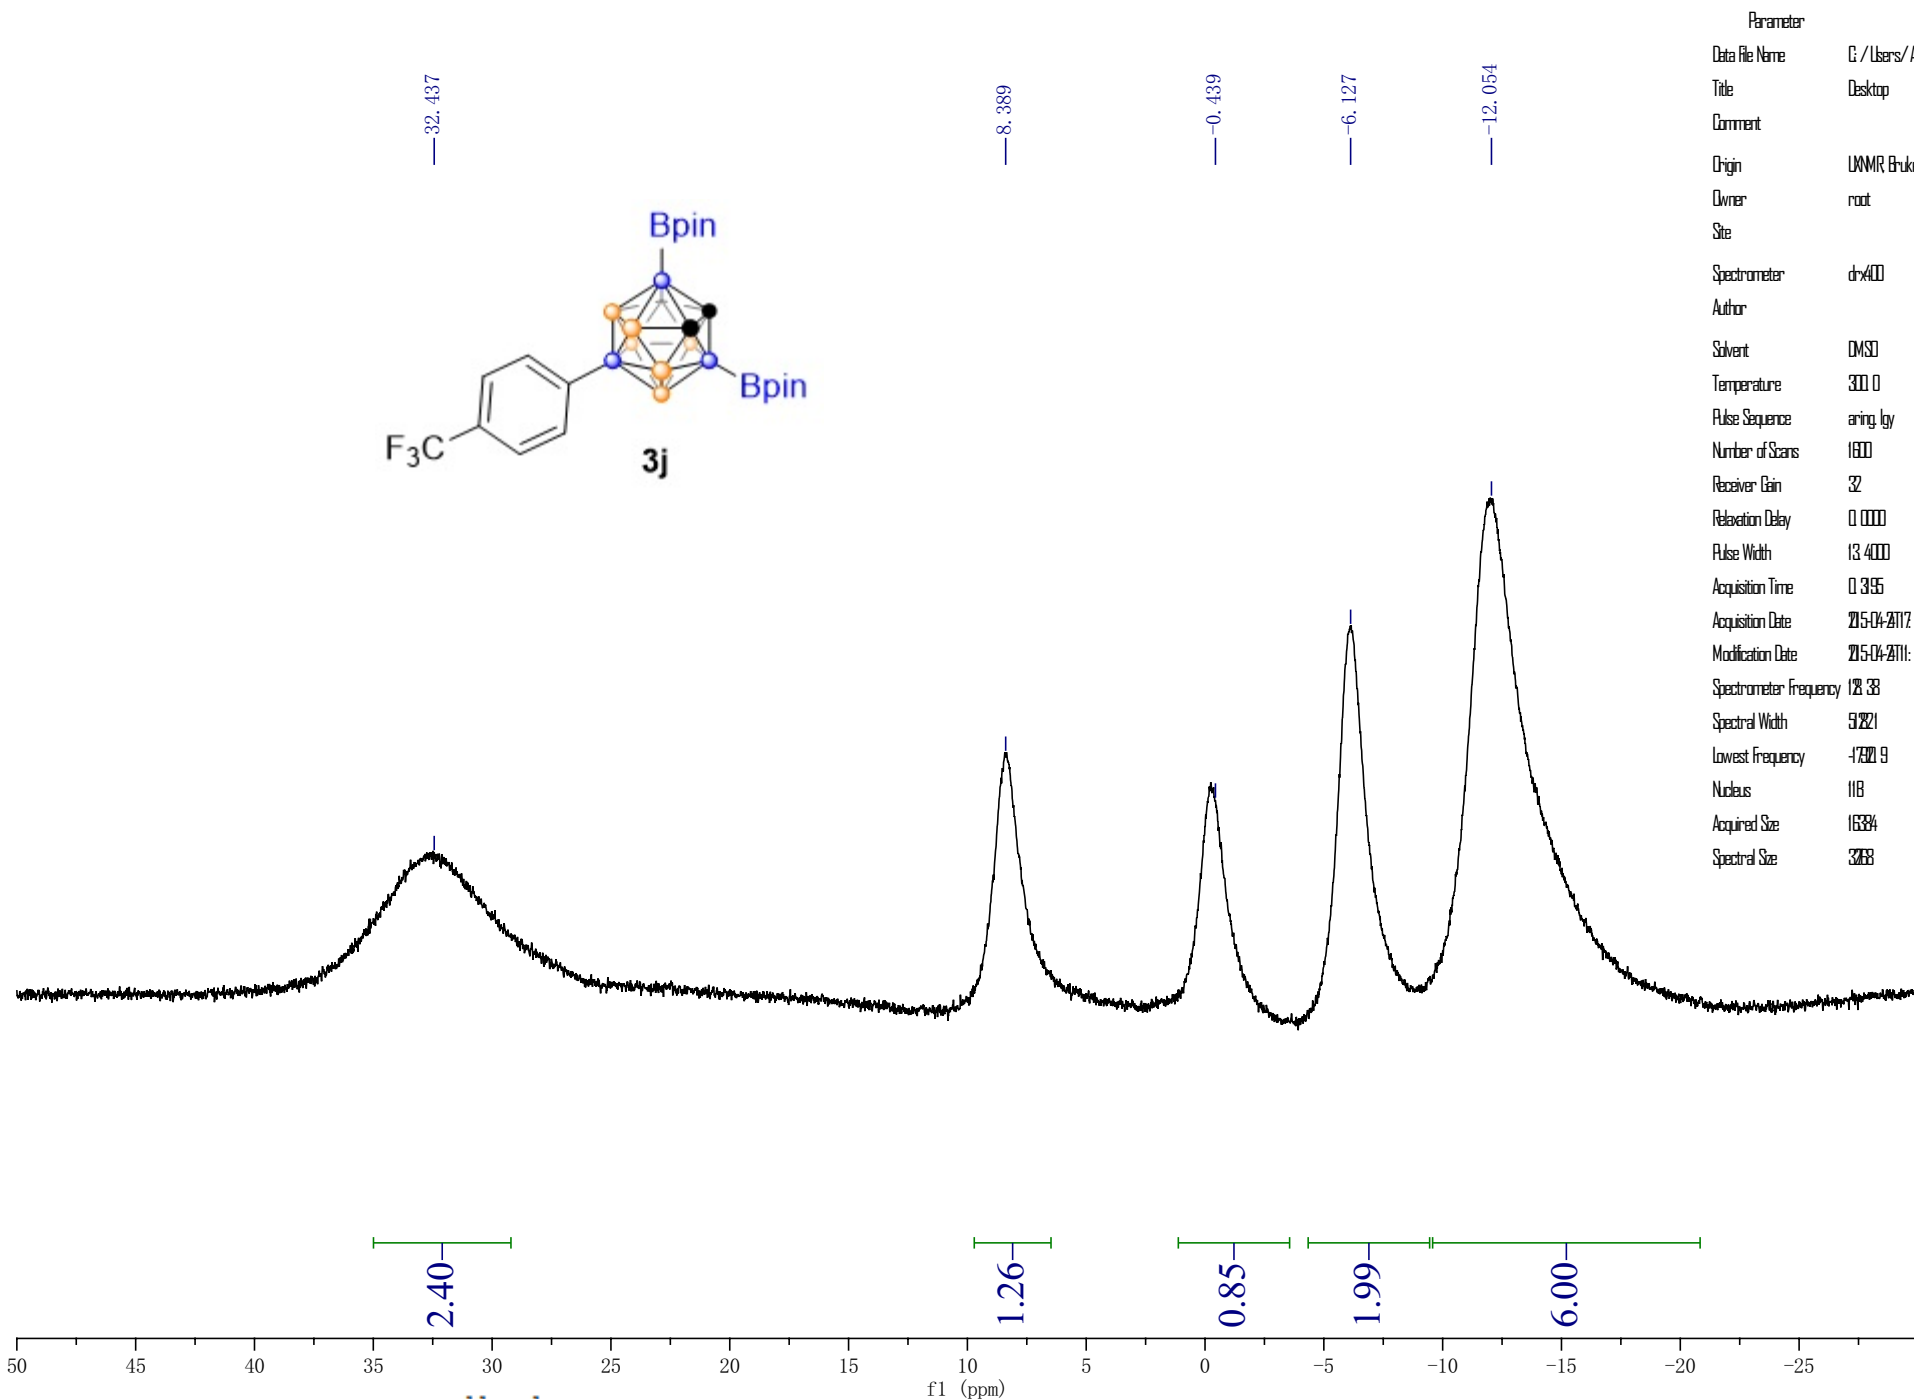

| Parameter              | Value                                        |
|------------------------|----------------------------------------------|
| Data File Name         | G:/Users/Administrator/Desktop/b-crf-4-46/td |
| Title                  | Desktop                                      |
| Comment                |                                              |
| Origin                 | UNMR, Bruker Analytische Messtechnik GmbH    |
| Owner                  | root                                         |
| Site                   |                                              |
| Spectrometer           | dx400                                        |
| Author                 |                                              |
| Solvent                | DMSO                                         |
| Temperature            | 300.0                                        |
| Pulse Sequence         | aning_lg                                     |
| Number of Scans        | 1600                                         |
| Receiver Gain          | 32                                           |
| Relaxation Delay       | 0.0000                                       |
| Pulse Width            | 13.4000                                      |
| Acquisition Time       | 0.3155                                       |
| Acquisition Date       | 2015-04-20T17:14:48                          |
| Modification Date      | 2015-04-20T11:14:00                          |
| Spectrometer Frequency | 128.38                                       |
| Spectral Width         | 51.221                                       |
| Lowest Frequency       | -17.0019                                     |
| Nucleus                | 11B                                          |
| Acquired Size          | 16384                                        |
| Spectral Size          | 3268                                         |

Supplementary Figure 88. <sup>11</sup>B{<sup>1</sup>H} NMR Spectrum of **3j**.

crf-4-46-B-coupling-CDCl<sub>3</sub>

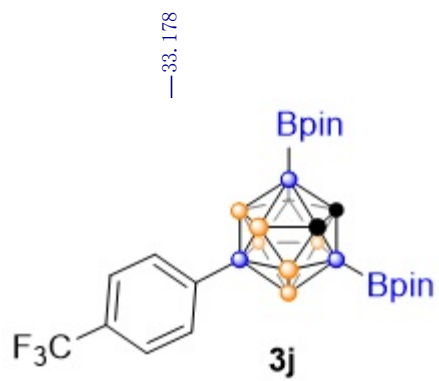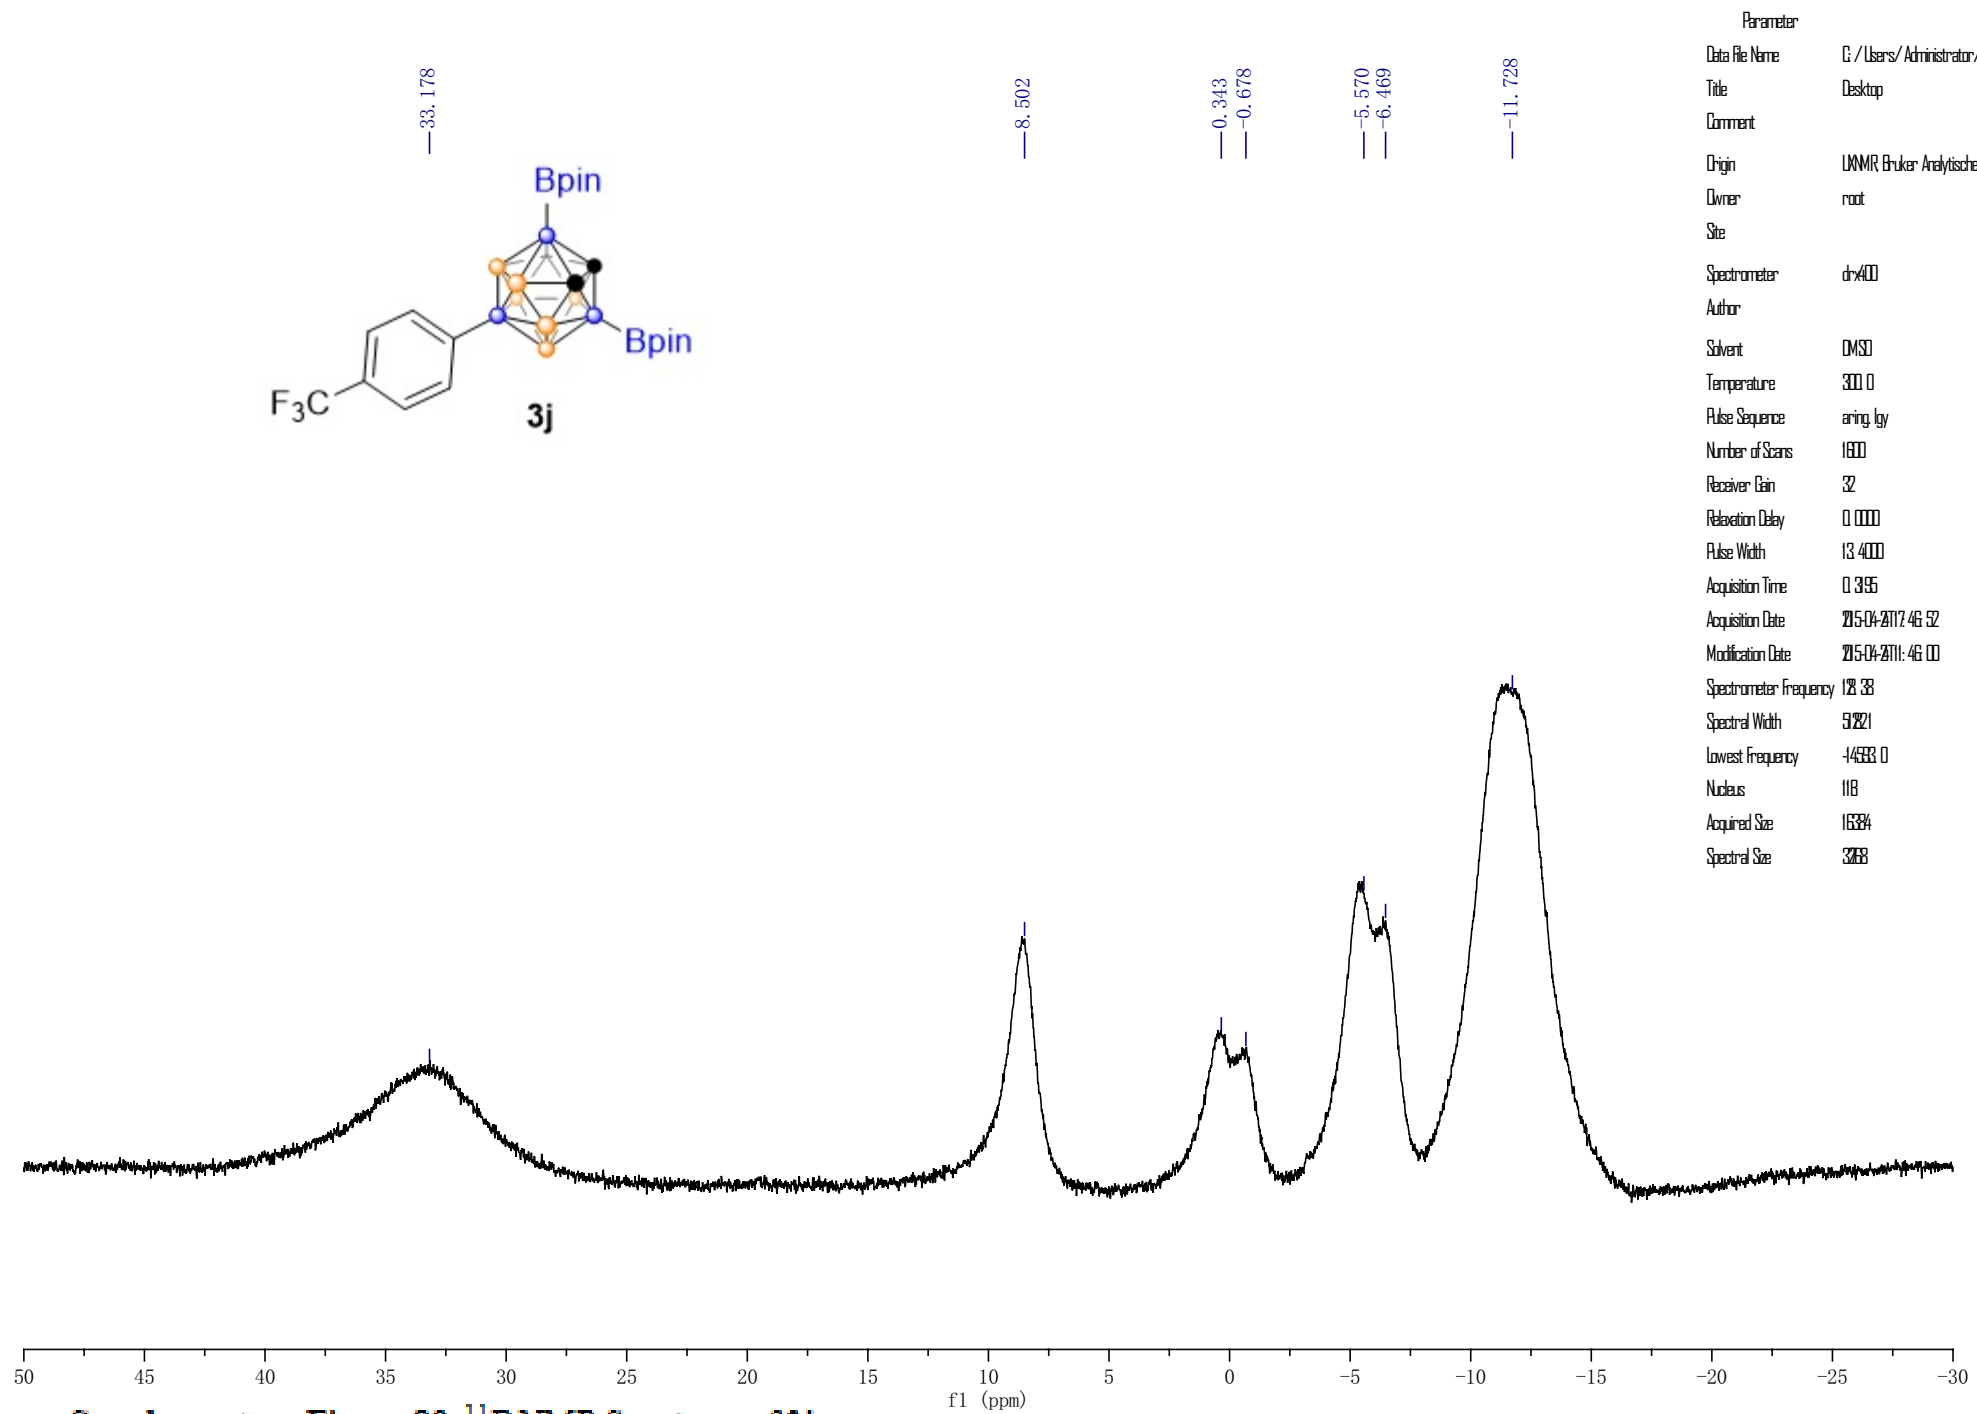

| Parameter              | Value                                                 |
|------------------------|-------------------------------------------------------|
| Data File Name         | C:/Users/Administrator/Desktop/b-crf4-46-coupling/fid |
| Title                  | Desktop                                               |
| Comment                |                                                       |
| Origin                 | UNMR Bruker Analytische Messtechnik GmbH              |
| Owner                  | root                                                  |
| Site                   |                                                       |
| Spectrometer           | dx400                                                 |
| Author                 |                                                       |
| Solvent                | DMSO                                                  |
| Temperature            | 300.0                                                 |
| Pulse Sequence         | aring 1g                                              |
| Number of Scans        | 1800                                                  |
| Receiver Gain          | 32                                                    |
| Relaxation Delay       | 0.0000                                                |
| Pulse Width            | 13.4000                                               |
| Acquisition Time       | 0.355                                                 |
| Acquisition Date       | 2015-04-21T17:46:52                                   |
| Modification Date      | 2015-04-21T17:46:00                                   |
| Spectrometer Frequency | 128.38                                                |
| Spectral Width         | 51.821                                                |
| Lowest Frequency       | -44583.0                                              |
| Nucleus                | 11B                                                   |
| Acquired Size          | 16384                                                 |
| Spectral Size          | 3268                                                  |

Supplementary Figure 89. <sup>11</sup>B NMR Spectrum of **3j**.

crf-4-46-F-CDCl<sub>3</sub>

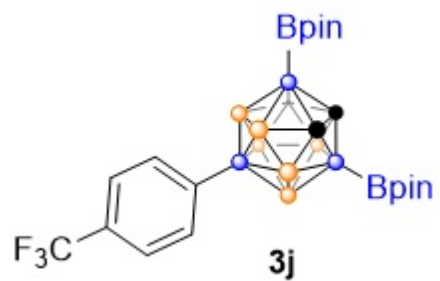

62.537

| Parameter              | Value                 |
|------------------------|-----------------------|
| Title                  | 21353-cr4-46_ALLONE_0 |
| Comment                | 21353-cr4-46          |
| Origin                 | Varian                |
| Owner                  |                       |
| Site                   |                       |
| Spectrometer           | nmr5                  |
| Author                 |                       |
| Solvent                | cdcl3                 |
| Temperature            | 25.0                  |
| Pulse Sequence         | zgpg30                |
| Number of Scans        | 16                    |
| Receiver Gain          | 56                    |
| Relaxation Delay       | 1.0000                |
| Pulse Width            | 0.0000                |
| Acquisition Date       | 21-08-04 17:08:19     |
| Spectrometer Frequency | 316.06                |
| Spectral Width         | 8885.7                |
| Lowest Frequency       | -7830.4               |
| Nucleus                | 19F                   |
| Acquired Size          | 65535                 |
| Spectral Size          | 13102                 |

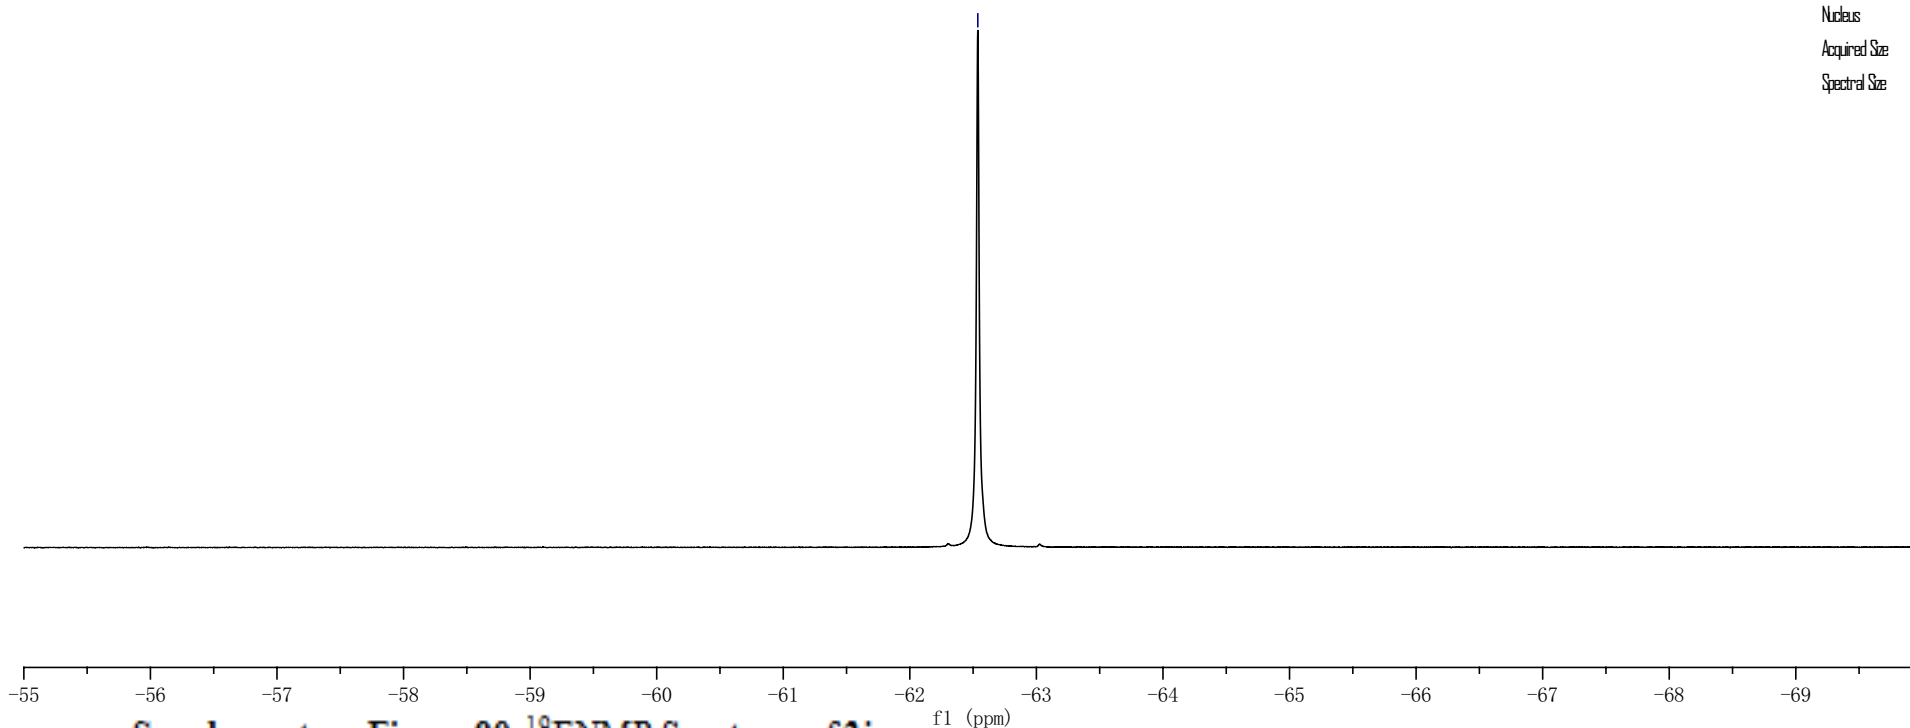

Supplementary Figure 90. <sup>19</sup>F NMR Spectrum of **3j**.

crf-4-21-H-CDCl<sub>3</sub>

7.260

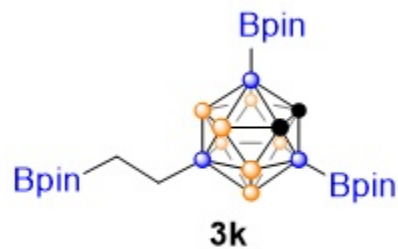

3.476  
3.405

1.250  
1.215

0.784  
0.747

| Parameter              | Value                        |
|------------------------|------------------------------|
| Title                  | crf-4-21-H-CDCl <sub>3</sub> |
| Comment                | STANDARD 1H NMR              |
| Origin                 | Varian                       |
| Owner                  |                              |
| Site                   |                              |
| Spectrometer           | mercury                      |
| Author                 | omc                          |
| Solvent                | CDCl <sub>3</sub>            |
| Temperature            | 29.0                         |
| Pulse Sequence         | zgpg30                       |
| Number of Scans        | 8                            |
| Receiver Gain          | 28                           |
| Relaxation Delay       | 1.0000                       |
| Pulse Width            | 0.0000                       |
| Acquisition Date       | 2015-04-08 10:32:39          |
| Spectrometer Frequency | 300.03                       |
| Spectral Width         | 5464.5                       |
| Lowest Frequency       | -708.6                       |
| Nucleus                | 1H                           |
| Acquired Size          | 10976                        |
| Spectral Size          | 3268                         |

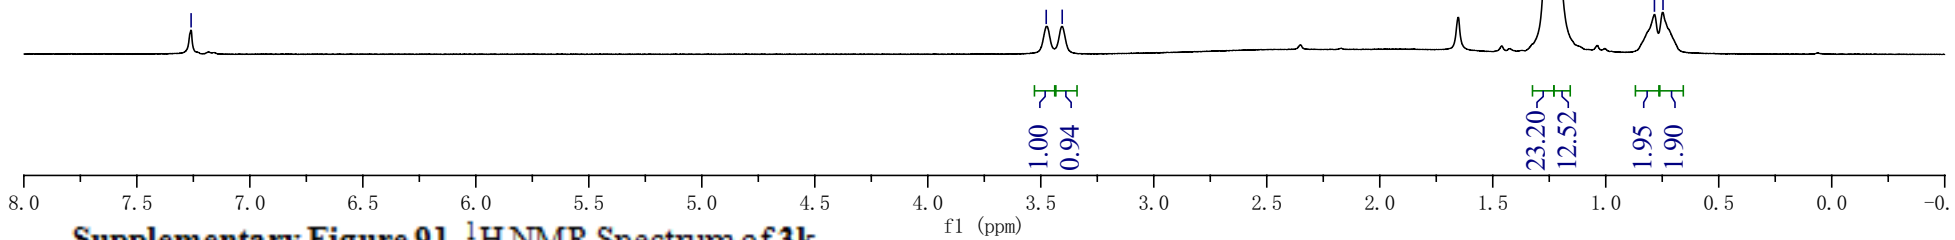

Supplementary Figure 91. <sup>1</sup>H NMR Spectrum of 3k.



crf-4-21-H-CDCl<sub>3</sub>

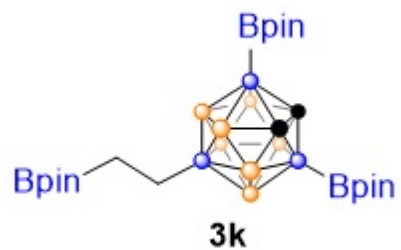

84.212  
82.783  
77.715  
77.289  
76.865

56.294  
51.010

25.052

| Parameter              | Value                |
|------------------------|----------------------|
| Title                  | crf-4-2-G-0408       |
| Comment                | 13C OBSERVE          |
| Origin                 | Varian               |
| Owner                  |                      |
| Site                   |                      |
| Spectrometer           | mercury              |
| Author                 | omc                  |
| Solvent                | CDCl <sub>3</sub>    |
| Temperature            | 21.0                 |
| Pulse Sequence         | sZul                 |
| Number of Scans        | 128                  |
| Receiver Gain          | 34                   |
| Relaxation Delay       | 1.0000               |
| Pulse Width            | 0.0000               |
| Acquisition Date       | 2015-04-08 11: 2: 38 |
| Spectrometer Frequency | 76.45                |
| Spectral Width         | 18897.0              |
| Lowest Frequency       | -162.8               |
| Nucleus                | 13C                  |
| Acquired Size          | 2955                 |
| Spectral Size          | 65536                |

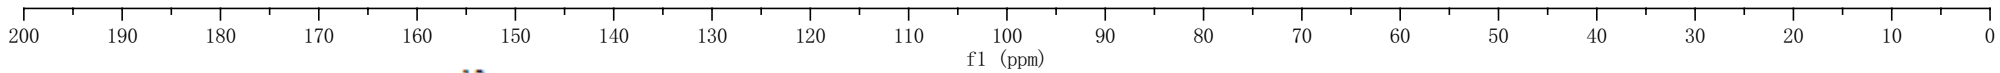

Supplementary Figure 92. <sup>13</sup>C NMR Spectrum of 3k.

crf-4-21-B-decoupling-CDCl<sub>3</sub>

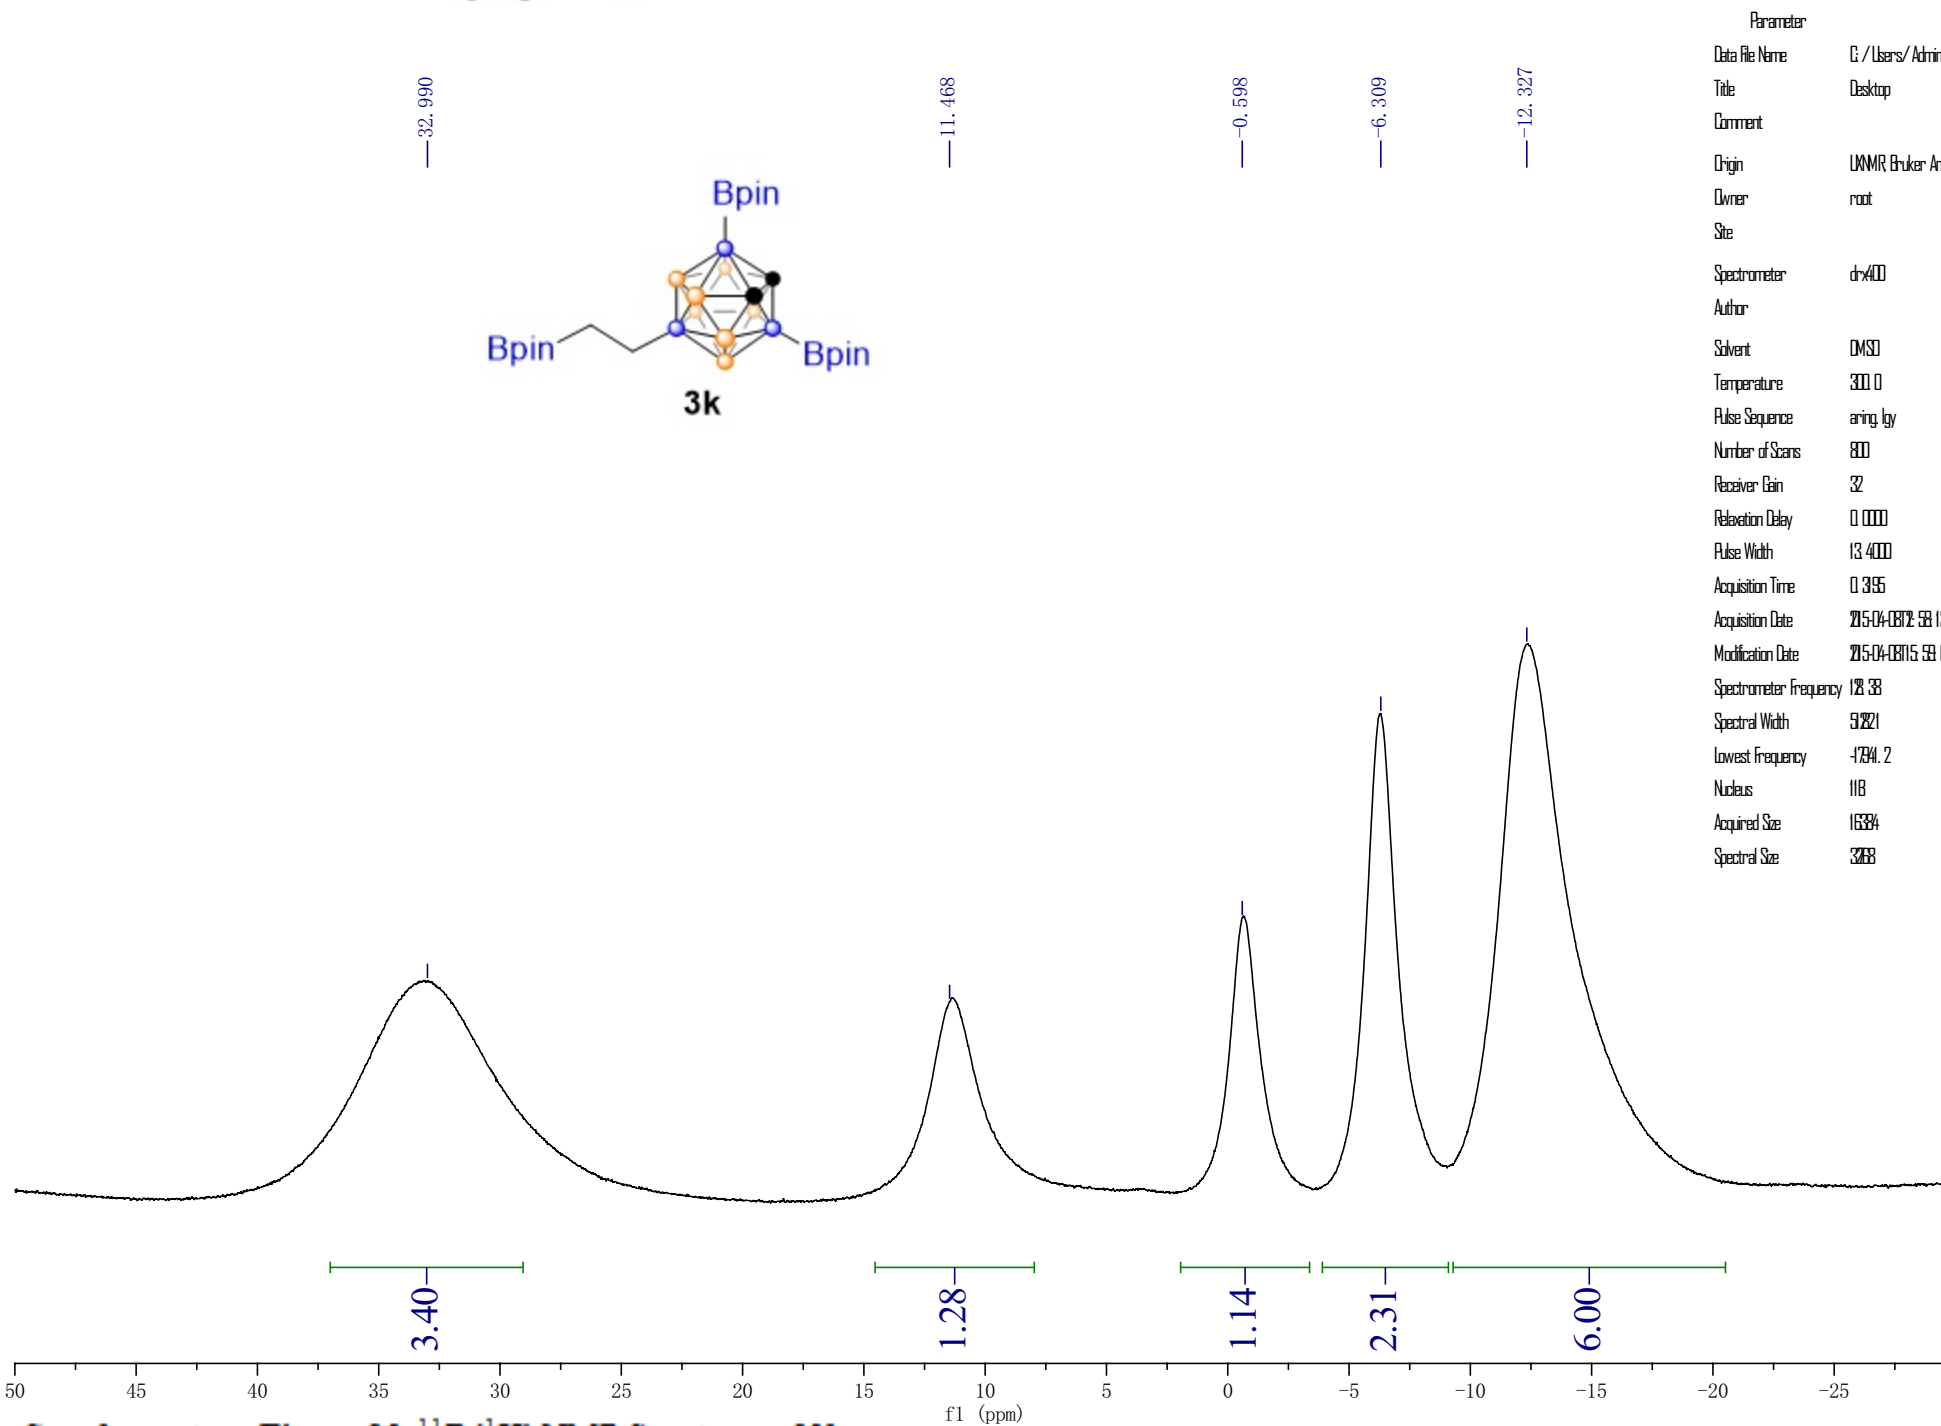

| Parameter              | Value                                        |
|------------------------|----------------------------------------------|
| Data File Name         | C:/Users/Administrator/Desktop/b-crf-4-21-1d |
| Title                  | Desktop                                      |
| Comment                |                                              |
| Origin                 | UNMR Bruker Analytische Messtechnik GmbH     |
| Owner                  | root                                         |
| Site                   |                                              |
| Spectrometer           | dx400                                        |
| Author                 |                                              |
| Solvent                | DMSO                                         |
| Temperature            | 300.0                                        |
| Pulse Sequence         | aring.1g                                     |
| Number of Scans        | 800                                          |
| Receiver Gain          | 32                                           |
| Relaxation Delay       | 0.0000                                       |
| Pulse Width            | 13.4000                                      |
| Acquisition Time       | 0.395                                        |
| Acquisition Date       | 2015-04-08 12:58:13                          |
| Modification Date      | 2015-04-08 15:58:00                          |
| Spectrometer Frequency | 128.38                                       |
| Spectral Width         | 51.821                                       |
| Lowest Frequency       | -17.894.2                                    |
| Nucleus                | 11B                                          |
| Acquired Size          | 16384                                        |
| Spectral Size          | 3268                                         |

Supplementary Figure 93. <sup>11</sup>B{<sup>1</sup>H} NMR Spectrum of **3k**.

crf-4-21-B-coupling-CDCl<sub>3</sub>

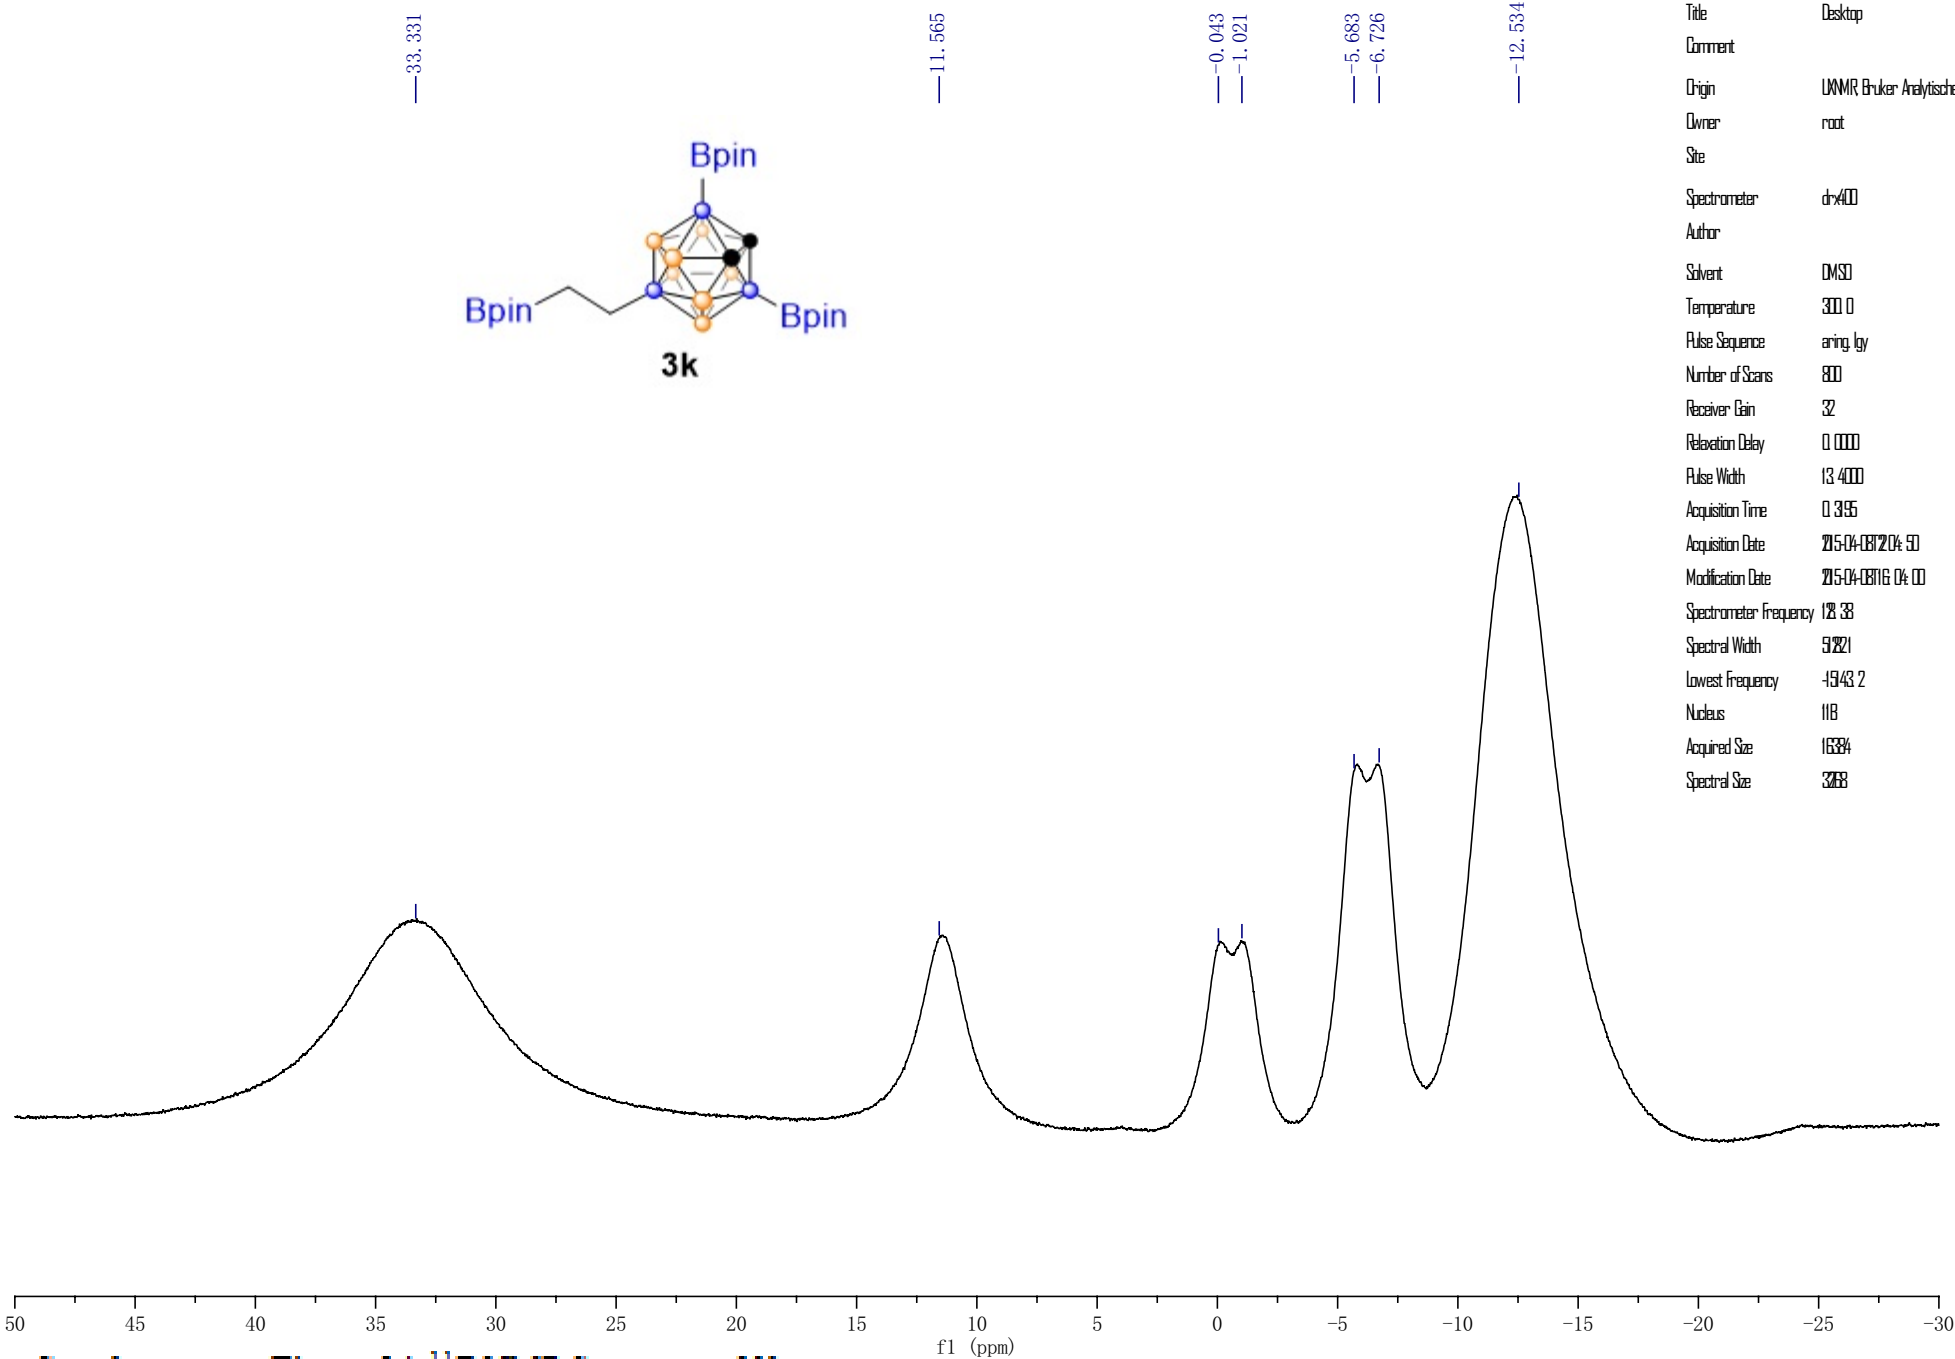

| Parameter              | Value                                                |
|------------------------|------------------------------------------------------|
| Data File Name         | C:/Users/Administrator/Desktop/b-cr-4-2-coupling/fid |
| Title                  | Desktop                                              |
| Comment                |                                                      |
| Origin                 | LUMMR Bruker Analytische Messtechnik GmbH            |
| Owner                  | root                                                 |
| Site                   |                                                      |
| Spectrometer           | dmx400                                               |
| Author                 |                                                      |
| Solvent                | DMSO                                                 |
| Temperature            | 300.0                                                |
| Pulse Sequence         | zing_1g                                              |
| Number of Scans        | 800                                                  |
| Receiver Gain          | 32                                                   |
| Relaxation Delay       | 0.0000                                               |
| Pulse Width            | 13.4000                                              |
| Acquisition Time       | 0.3195                                               |
| Acquisition Date       | 2015-04-08 12:04:50                                  |
| Modification Date      | 2015-04-08 16:04:00                                  |
| Spectrometer Frequency | 128.38                                               |
| Spectral Width         | 5.2821                                               |
| Lowest Frequency       | -19.432                                              |
| Nucleus                | 11B                                                  |
| Acquired Size          | 16384                                                |
| Spectral Size          | 3268                                                 |

Supplementary Figure 94. <sup>11</sup>B NMR Spectrum of **3k**.

crf-3-76-H-CDCl<sub>3</sub>

7.260

3.960

1.252

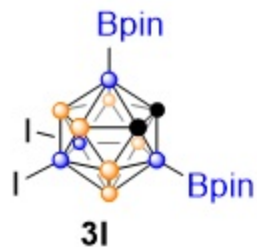

| Parameter              | Value             |
|------------------------|-------------------|
| Title                  | crf3-76-H         |
| Comment                | STANDARD OBSERVE  |
| Origin                 | Varian            |
| Owner                  |                   |
| Site                   |                   |
| Spectrometer           | mercury           |
| Author                 | omc               |
| Solvent                | CDCl <sub>3</sub> |
| Temperature            | 21.0              |
| Pulse Sequence         | zgpg30            |
| Number of Scans        | 8                 |
| Receiver Gain          | 21                |
| Relaxation Delay       | 1.0000            |
| Pulse Width            | 0.0000            |
| Acquisition Date       | 2015-02-17 24:19  |
| Spectrometer Frequency | 300.03            |
| Spectral Width         | 5494.5            |
| Lowest Frequency       | -708.5            |
| Nucleus                | <sup>1</sup> H    |
| Acquired Size          | 10816             |
| Spectral Size          | 3288              |

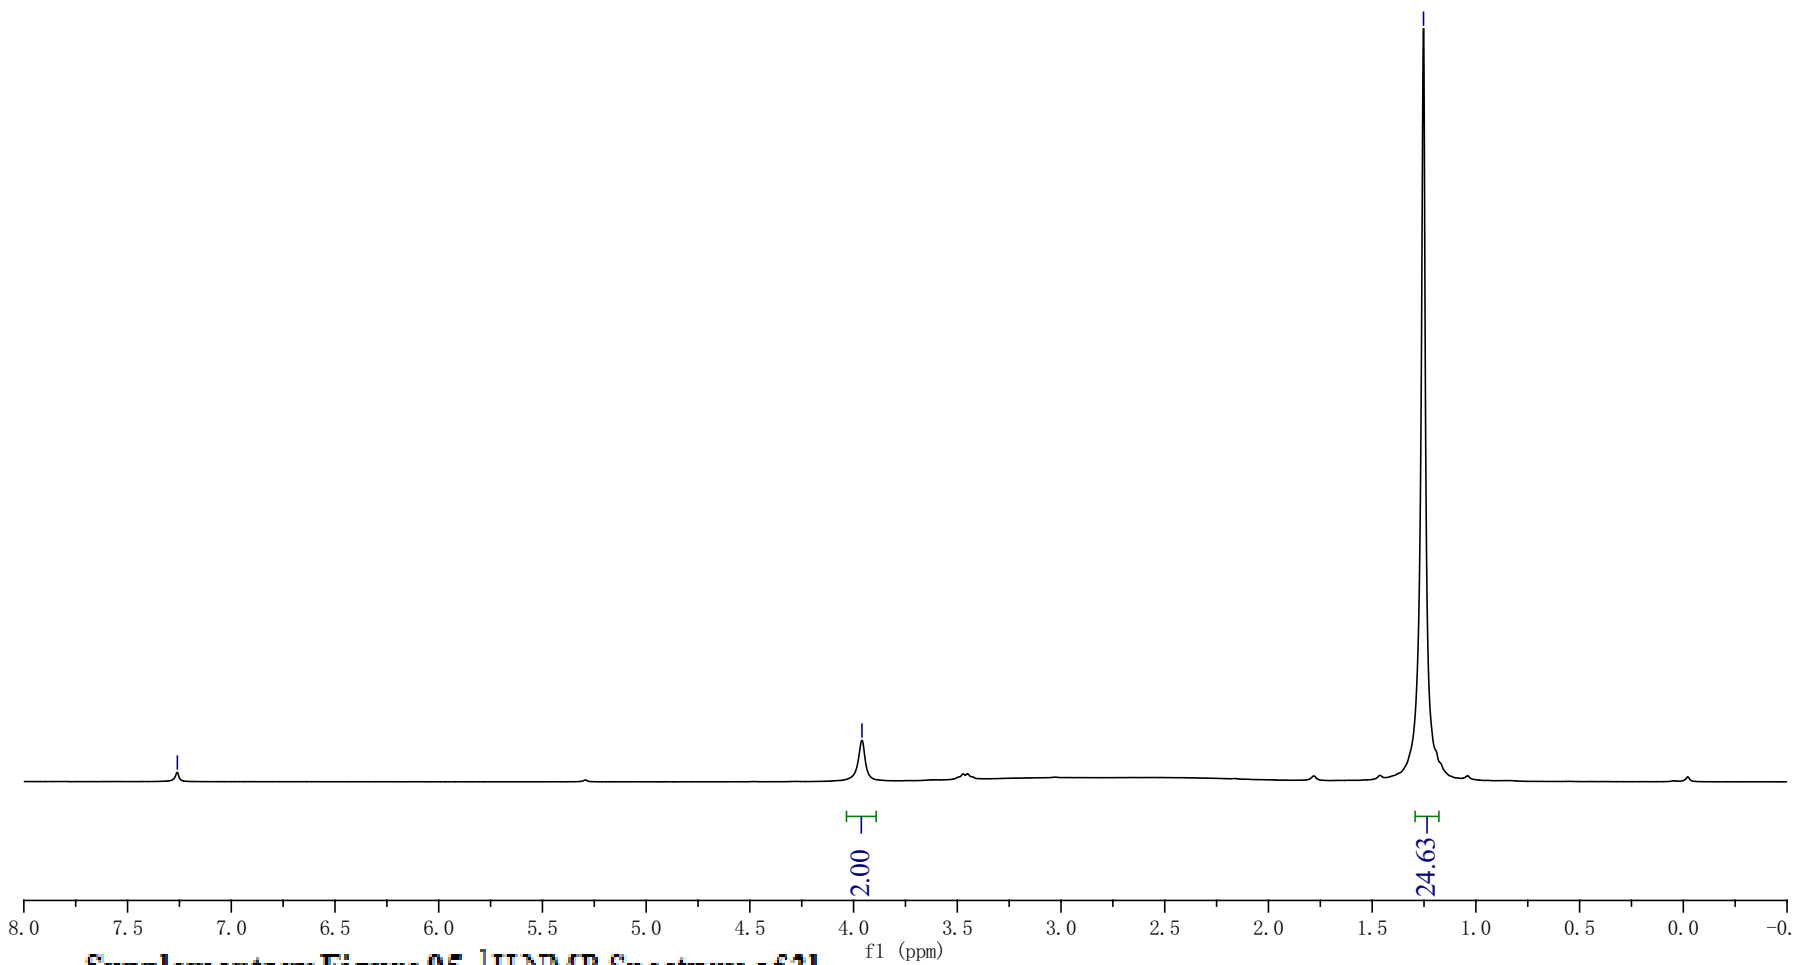

Supplementary Figure 95. <sup>1</sup>H NMR Spectrum of 31.

crf-3-76-C-CDCl<sub>3</sub>

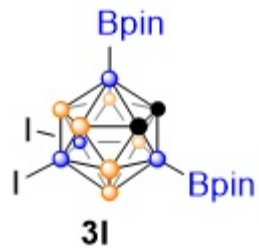

84.549  
77.311  
76.889  
76.465  
54.342  
24.714

| Parameter              | Value              |
|------------------------|--------------------|
| Title                  | crf-3-76-C         |
| Comment                | 13C OBSERVE        |
| Origin                 | Varian             |
| Owner                  |                    |
| Site                   |                    |
| Spectrometer           | mercury            |
| Author                 | omc                |
| Solvent                | CDCl <sub>3</sub>  |
| Temperature            | 28.0               |
| Pulse Sequence         | sZuj               |
| Number of Scans        | 40                 |
| Receiver Gain          | 34                 |
| Relaxation Delay       | 1.0000             |
| Pulse Width            | 0.0000             |
| Acquisition Date       | 2015-02-17 2:42:05 |
| Spectrometer Frequency | 75.45              |
| Spectral Width         | 18887.0            |
| Lowest Frequency       | -1658.2            |
| Nucleus                | 13C                |
| Acquired Size          | 2895               |
| Spectral Size          | 65536              |

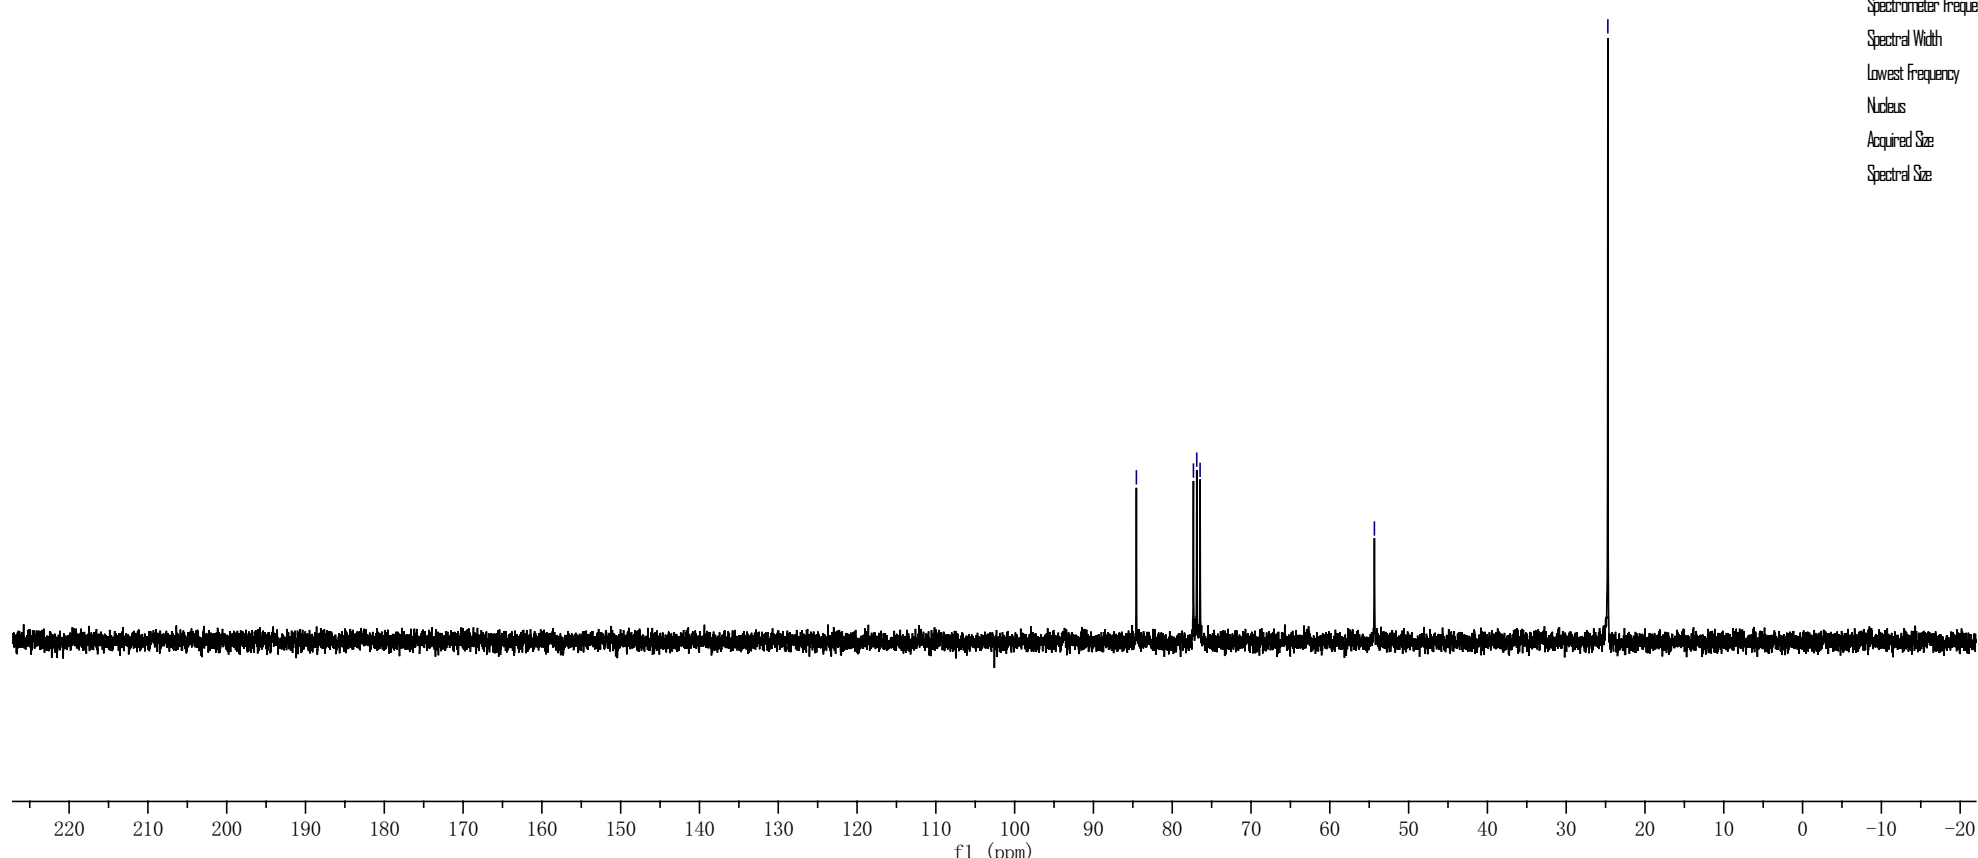

Supplementary Figure 96. <sup>13</sup>C NMR Spectrum of 31.

crf-3-76-B-decoupling-CDCl<sub>3</sub>

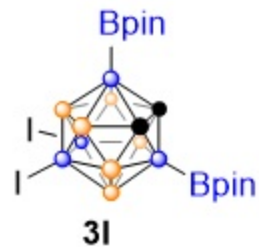

32.441

-3.253

-11.012

-12.617

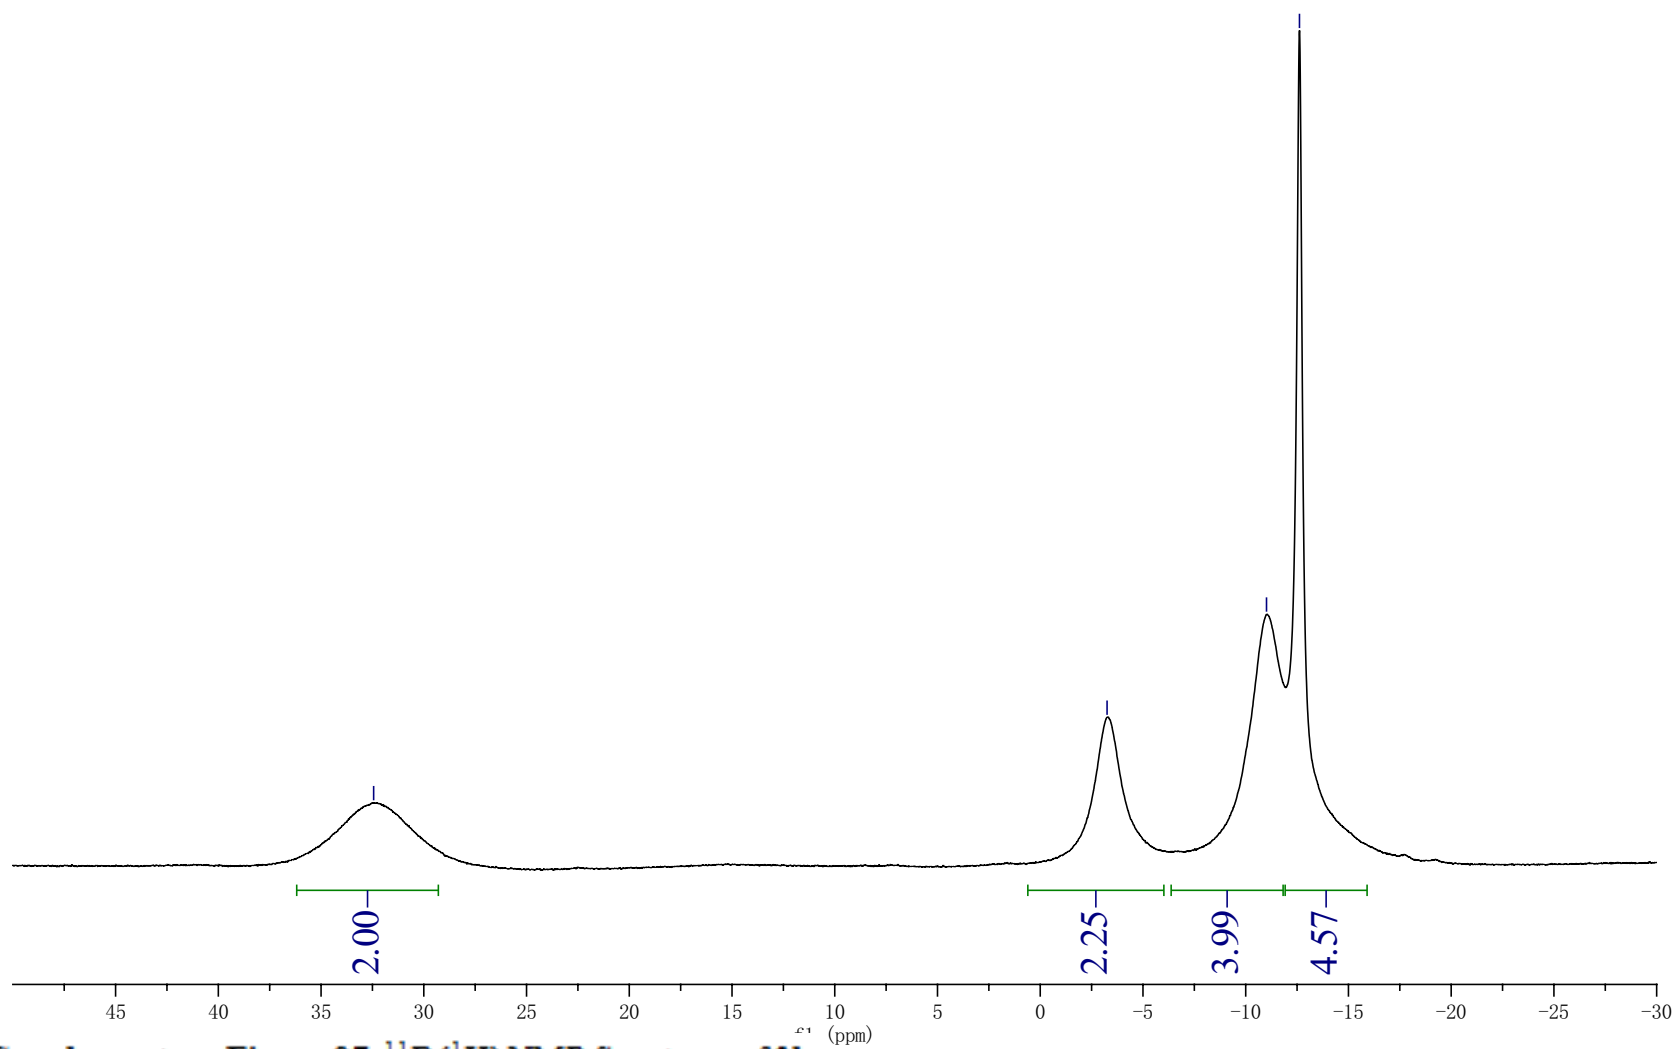

| Parameter              | Value                                         |
|------------------------|-----------------------------------------------|
| Data File Name         | C:/Users/Administrator/Desktop/b-crf-3-76/fid |
| Title                  | Desktop                                       |
| Comment                |                                               |
| Origin                 | UNMR Bruker Analytische Messtechnik GmbH      |
| Owner                  | root                                          |
| Site                   |                                               |
| Spectrometer           | dr400                                         |
| Author                 |                                               |
| Solvent                | DMSO                                          |
| Temperature            | 300.0                                         |
| Pulse Sequence         | aring.1g                                      |
| Number of Scans        | 435                                           |
| Receiver Gain          | 32                                            |
| Relaxation Delay       | 0.000                                         |
| Pulse Width            | 13.400                                        |
| Acquisition Time       | 0.395                                         |
| Acquisition Date       | 2015-02-04 15:59:59                           |
| Modification Date      | 2015-02-04 18:00:00                           |
| Spectrometer Frequency | 128.38                                        |
| Spectral Width         | 59.221                                        |
| Lowest Frequency       | -18565.1                                      |
| Nucleus                | 11B                                           |
| Acquired Size          | 16384                                         |
| Spectral Size          | 3268                                          |

Supplementary Figure 97. <sup>11</sup>B{<sup>1</sup>H} NMR Spectrum of 31.

crf-3-76-B-coupling-CDCl<sub>3</sub>

32.661

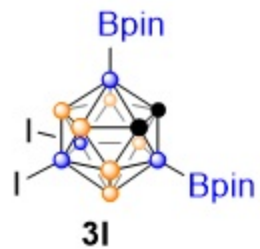

-2.672

-3.856

-10.548

-12.592

| Parameter              | Value                                                           |
|------------------------|-----------------------------------------------------------------|
| Data File Name         | G:/Users/Administrator/Desktop/b-crf-3-76-withoutdecoupling/fid |
| Title                  | Desktop                                                         |
| Comment                |                                                                 |
| Origin                 | UNMR Bruker Analytische Messtechnik GmbH                        |
| Owner                  | root                                                            |
| Site                   |                                                                 |
| Spectrometer           | drx400                                                          |
| Author                 |                                                                 |
| Solvent                | DMSO                                                            |
| Temperature            | 300.0                                                           |
| Pulse Sequence         | aring-1gy                                                       |
| Number of Scans        | 666                                                             |
| Receiver Gain          | 32                                                              |
| Relaxation Delay       | 0.0000                                                          |
| Pulse Width            | 13.4000                                                         |
| Acquisition Time       | 0.395                                                           |
| Acquisition Date       | 2015-02-04T16:01:17                                             |
| Modification Date      | 2015-02-04T16:04:00                                             |
| Spectrometer Frequency | 128.38                                                          |
| Spectral Width         | 51921                                                           |
| Lowest Frequency       | -18885.1                                                        |
| Nucleus                | 11B                                                             |
| Acquired Size          | 16384                                                           |
| Spectral Size          | 3268                                                            |

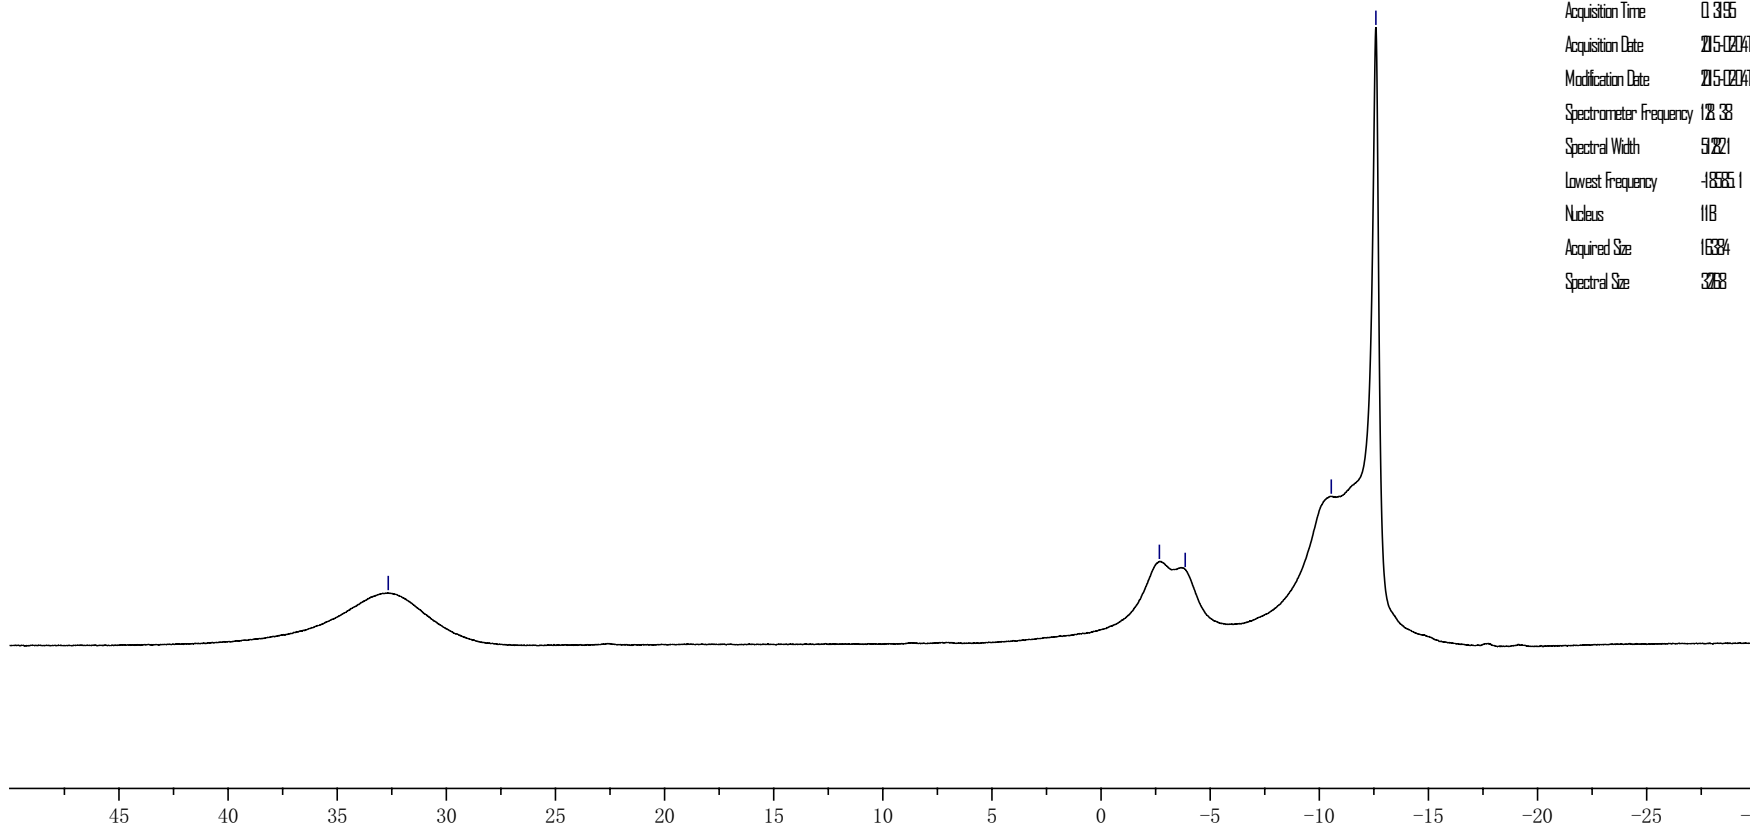

Supplementary Figure 98. <sup>11</sup>B NMR Spectrum of 31.

crf-4-4-H-CDCl<sub>3</sub>

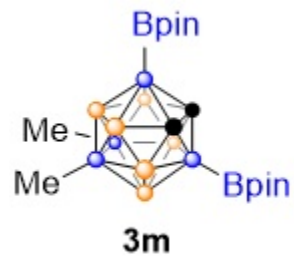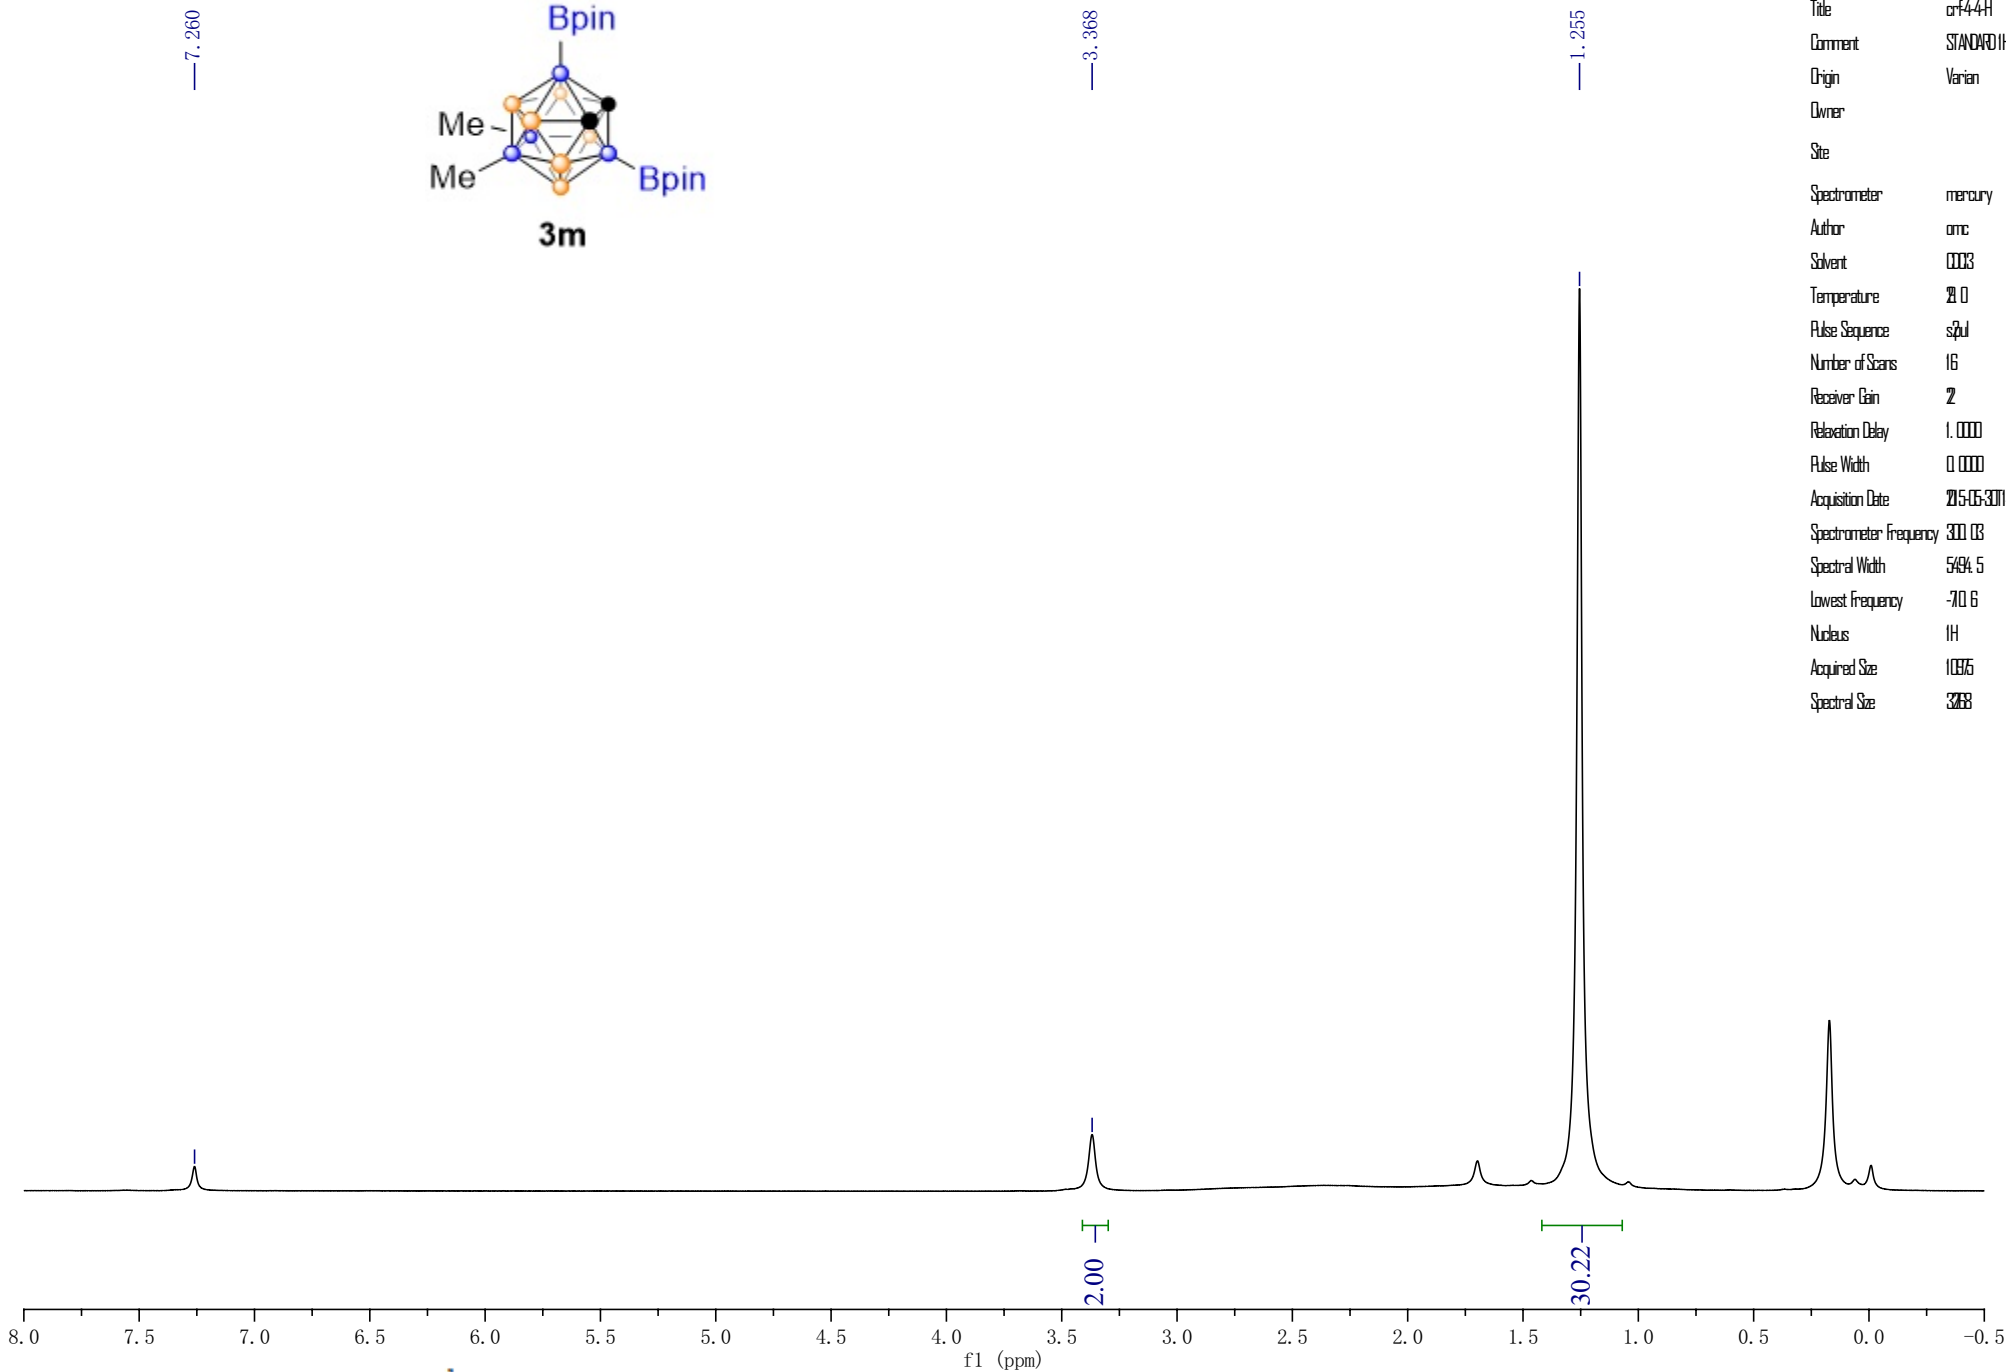

| Parameter              | Value               |
|------------------------|---------------------|
| Title                  | crf-4-4-H           |
| Comment                | STANDARD 1H COSY    |
| Origin                 | Varian              |
| Owner                  |                     |
| Site                   |                     |
| Spectrometer           | mercury             |
| Author                 | omc                 |
| Solvent                | CDCl <sub>3</sub>   |
| Temperature            | 29.0                |
| Pulse Sequence         | sZul                |
| Number of Scans        | 16                  |
| Receiver Gain          | 2                   |
| Relaxation Delay       | 1.0000              |
| Pulse Width            | 0.0000              |
| Acquisition Date       | 2015-05-30T14:49:39 |
| Spectrometer Frequency | 300.03              |
| Spectral Width         | 5694.5              |
| Lowest Frequency       | -70.6               |
| Nucleus                | 1H                  |
| Acquired Size          | 10375               |
| Spectral Size          | 3268                |

Supplementary Figure 99. <sup>1</sup>H NMR Spectrum of **3m**.



crf-4-4-C-CDCl<sub>3</sub>

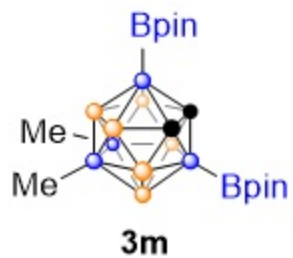

84.225  
77.708  
77.283  
76.859

50.633

25.075

| Parameter              | Value                       |
|------------------------|-----------------------------|
| Title                  | crf-4-4-C-CDCl <sub>3</sub> |
| Comment                | 13C OBSERVE                 |
| Origin                 | Varian                      |
| Owner                  |                             |
| Site                   |                             |
| Spectrometer           | mercury                     |
| Author                 | omc                         |
| Solvent                | CDCl <sub>3</sub>           |
| Temperature            | 29.0                        |
| Pulse Sequence         | sgul                        |
| Number of Scans        | 48                          |
| Receiver Gain          | 30                          |
| Relaxation Delay       | 1.0000                      |
| Pulse Width            | 0.0000                      |
| Acquisition Date       | 2015-05-30 15:06:06         |
| Spectrometer Frequency | 76.45                       |
| Spectral Width         | 18797.0                     |
| Lowest Frequency       | -162.8                      |
| Nucleus                | 13C                         |
| Acquired Size          | 2955                        |
| Spectral Size          | 65536                       |

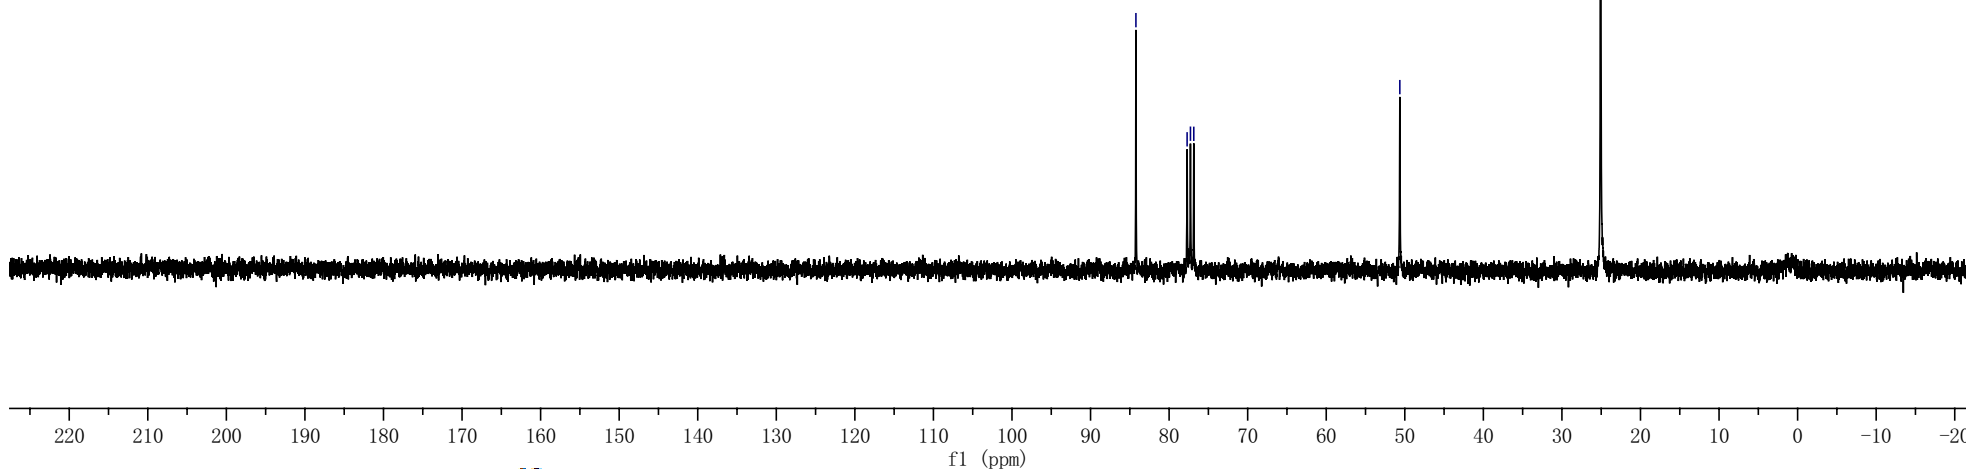

Supplementary Figure 100. <sup>13</sup>C NMR Spectrum of 3m.

crf-4-4-B-decouplinh-CDCl<sub>3</sub>

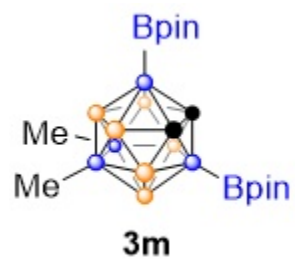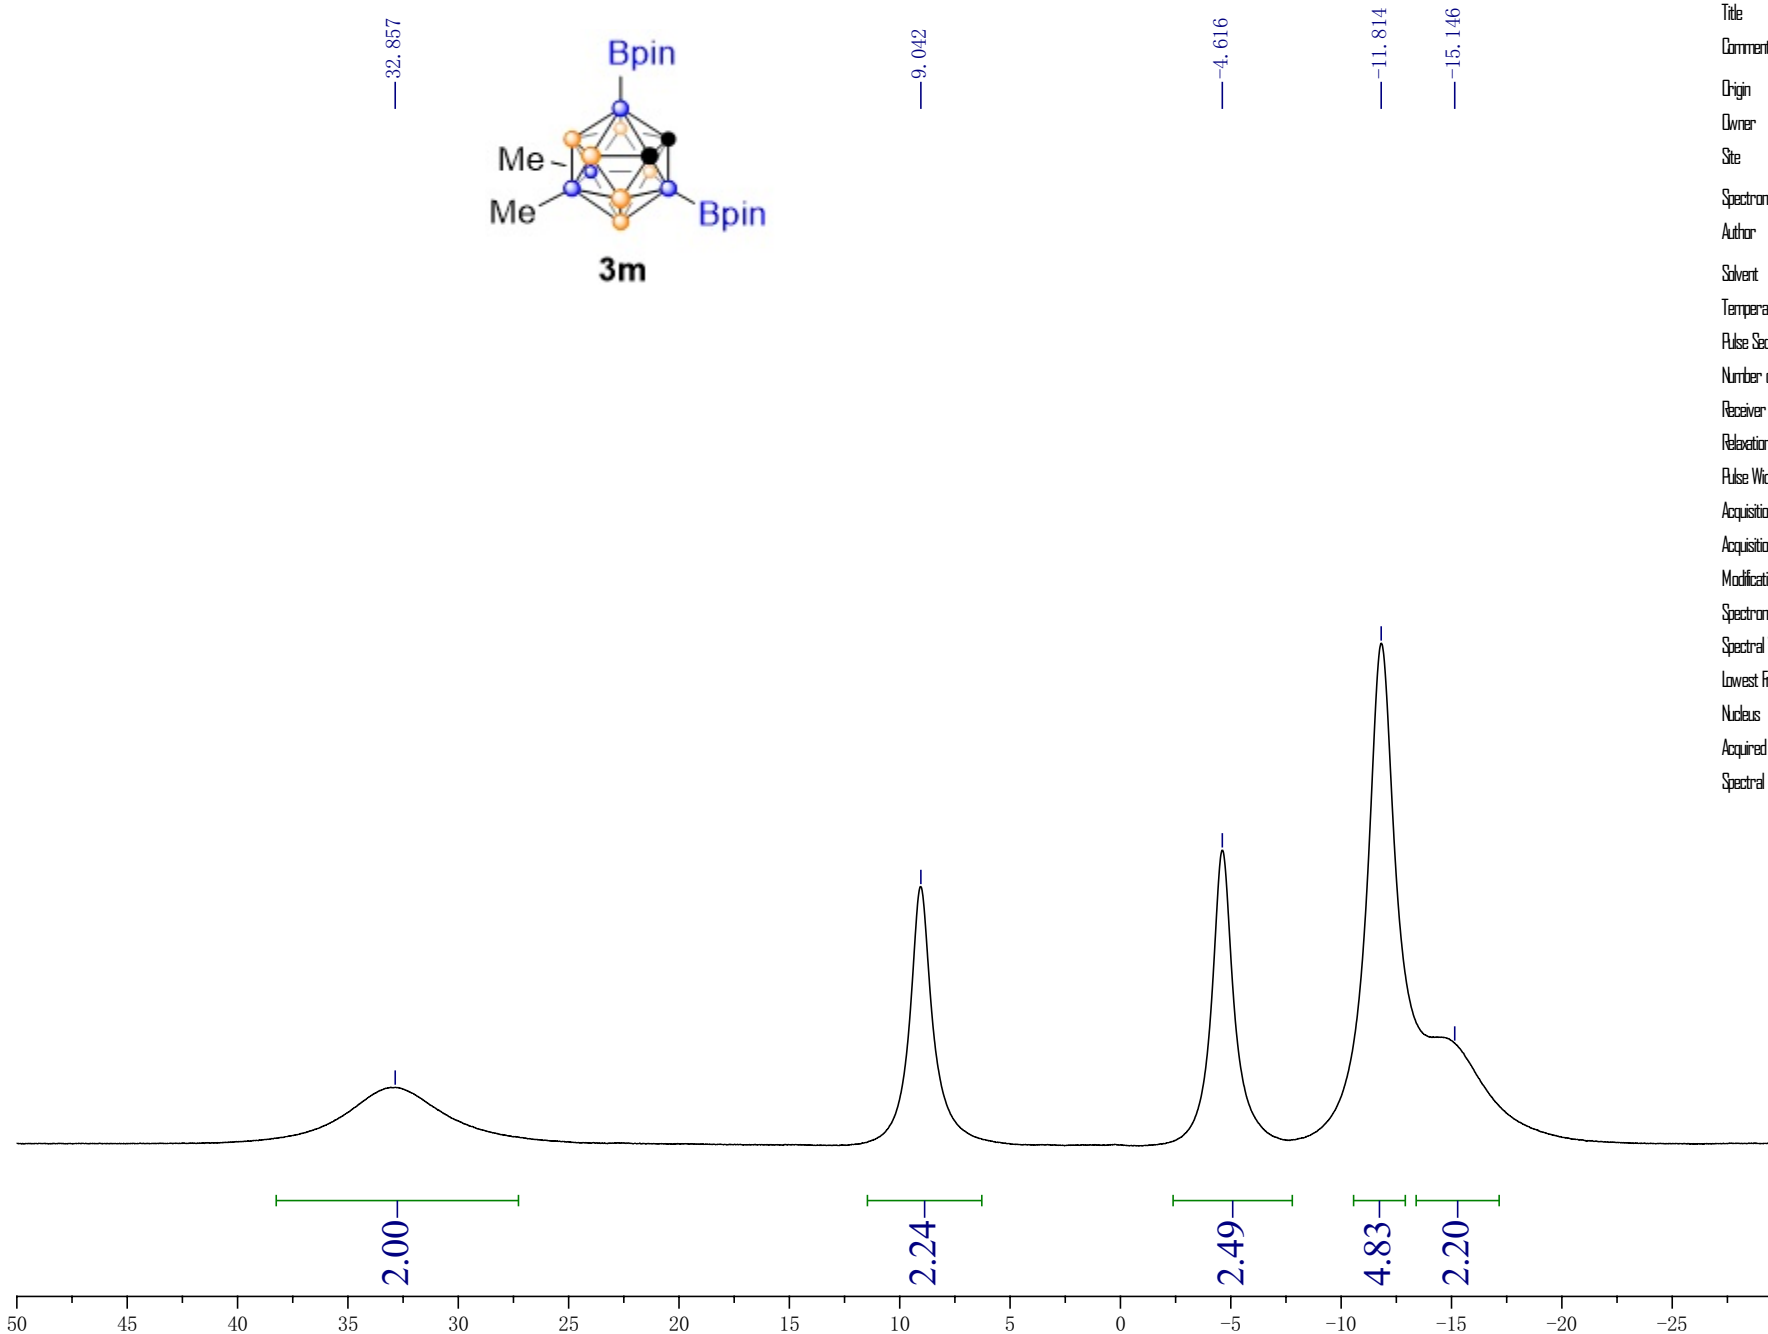

| Parameter              | Value                                                                |
|------------------------|----------------------------------------------------------------------|
| Data File Name         | G:/Users/Administrator/Desktop/work/送<br>样NMR/borane/4-4/b-cr4-4/fid |
| Title                  | 44                                                                   |
| Comment                |                                                                      |
| Origin                 | UMMR Bruker Analytische Messtechnik GmbH                             |
| Owner                  | root                                                                 |
| Site                   |                                                                      |
| Spectrometer           | dm400                                                                |
| Author                 |                                                                      |
| Solvent                | DMSO                                                                 |
| Temperature            | 300.0                                                                |
| Pulse Sequence         | aring.tgy                                                            |
| Number of Scans        | 800                                                                  |
| Receiver Gain          | 32                                                                   |
| Relaxation Delay       | 0.0000                                                               |
| Pulse Width            | 13.4000                                                              |
| Acquisition Time       | 0.395                                                                |
| Acquisition Date       | 2015-06-01 19:25:28                                                  |
| Modification Date      | 2015-06-01 13:25:00                                                  |
| Spectrometer Frequency | 128.38                                                               |
| Spectral Width         | 59221                                                                |
| Lowest Frequency       | -14466.9                                                             |
| Nucleus                | 11B                                                                  |
| Acquired Size          | 16394                                                                |
| Spectral Size          | 3268                                                                 |

Supplementary Figure 101. <sup>11</sup>B{<sup>1</sup>H} NMR Spectrum of 3m.

crf-4-4-B-coupling-CDCl<sub>3</sub>

32.971

9.101

4.060  
5.087

11.201  
12.272

14.892

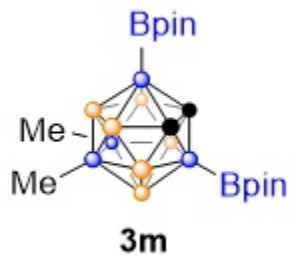

| Parameter              | Value                                                                    |
|------------------------|--------------------------------------------------------------------------|
| Data File Name         | C:/Users/Administrator/Desktop/work/送样NMR/borane/4-4/b-cr4-4-coupling/4d |
| Title                  | 4-4                                                                      |
| Comment                |                                                                          |
| Origin                 | UNMR Bruker Analytische Messtechnik GmbH                                 |
| Owner                  | root                                                                     |
| Site                   |                                                                          |
| Spectrometer           | drx400                                                                   |
| Author                 |                                                                          |
| Solvent                | DMSO                                                                     |
| Temperature            | 300.0                                                                    |
| Pulse Sequence         | aring_1g                                                                 |
| Number of Scans        | 800                                                                      |
| Receiver Gain          | 32                                                                       |
| Relaxation Delay       | 0.0000                                                                   |
| Pulse Width            | 13.4000                                                                  |
| Acquisition Time       | 0.355                                                                    |
| Acquisition Date       | 2015-08-07 19:18:49                                                      |
| Modification Date      | 2015-08-07 13:18:00                                                      |
| Spectrometer Frequency | 128.38                                                                   |
| Spectral Width         | 51221                                                                    |
| Lowest Frequency       | -14466.9                                                                 |
| Nucleus                | 11B                                                                      |
| Acquired Size          | 16384                                                                    |
| Spectral Size          | 3268                                                                     |

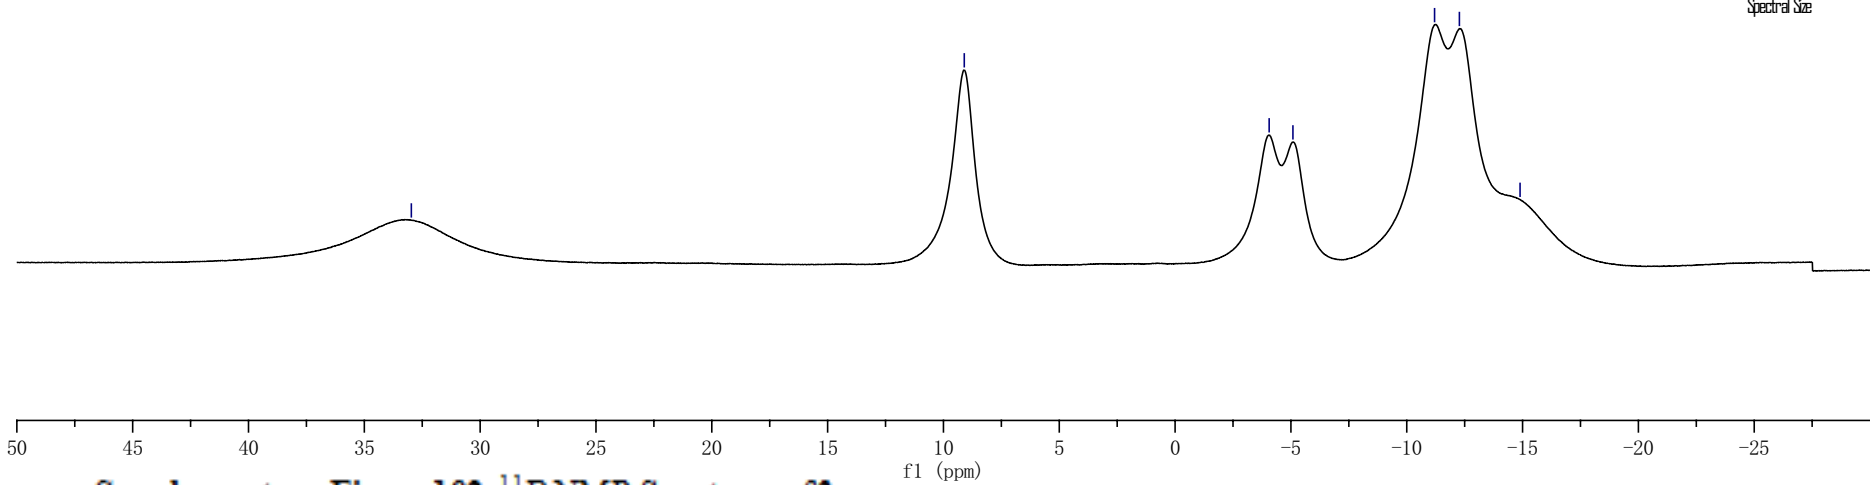

Supplementary Figure 102. <sup>11</sup>B NMR Spectrum of **3m**.

crf-4-7-H-CDCl<sub>3</sub>

7.260

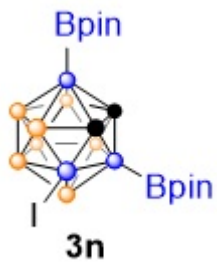

3.960

3.719

1.296

1.275

| Parameter        | Value               |
|------------------|---------------------|
| Title            | crf-4-7H            |
| Comment          | STANDARD 1H OBSERVE |
| Origin           | Varian              |
| Owner            |                     |
| Site             |                     |
| Spectrometer     | mercury             |
| Author           | omc                 |
| Solvent          | CDCl <sub>3</sub>   |
| Temperature      | 20.0                |
| Pulse Sequence   | sgpd                |
| Number of Scans  | 16                  |
| Receiver Gain    | 2                   |
| Relaxation Delay | 1.0000              |
| Pulse Width      | 0.0000              |
| Acquisition Date | 2015-03-27 15:42:42 |
| Spectrometer     | 300.03              |
| Frequency        |                     |
| Spectral Width   | 5494.5              |
| Lowest Frequency | -703.6              |
| Nucleus          | 1H                  |
| Acquired Size    | 10375               |
| Spectral Size    | 3268                |

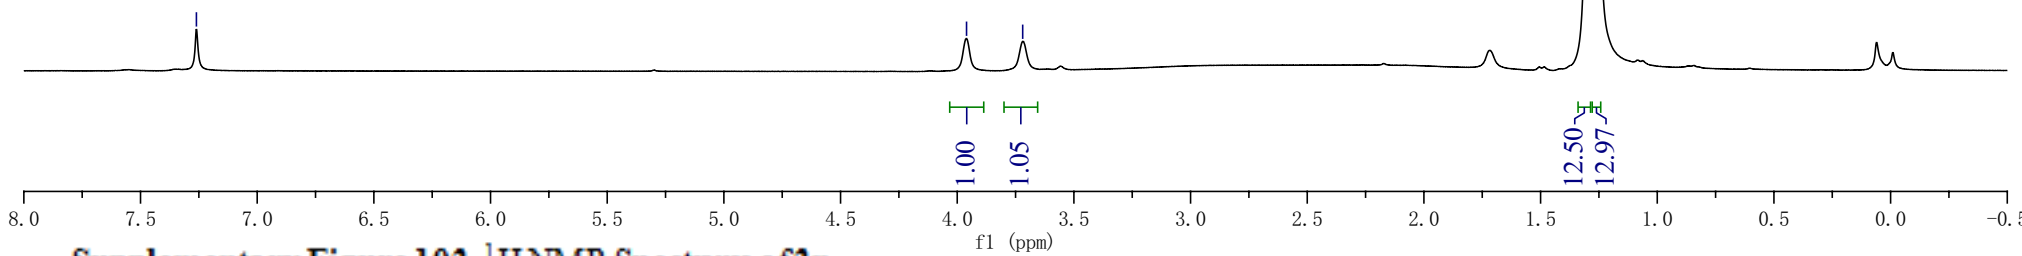

Supplementary Figure 103. <sup>1</sup>H NMR Spectrum of **3n**.

crf-4-7-C-CDCl<sub>3</sub>

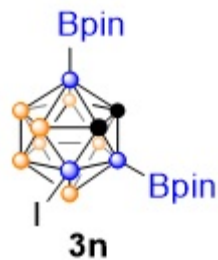

84.809  
84.651

77.689  
77.264  
76.842

59.930

25.236  
25.132  
25.091

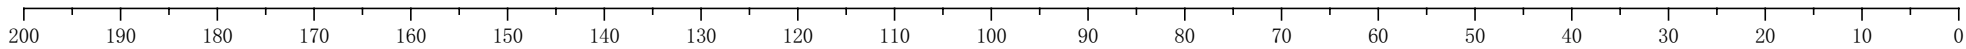

| Parameter              | Value               |
|------------------------|---------------------|
| Title                  | crf-4-7C-0409       |
| Comment                | 13C OBSERVE         |
| Origin                 | Varian              |
| Owner                  |                     |
| Site                   |                     |
| Spectrometer           | mercury             |
| Author                 | omc                 |
| Solvent                | CDCl <sub>3</sub>   |
| Temperature            | 29.0                |
| Pulse Sequence         | sZul                |
| Number of Scans        | 112                 |
| Receiver Gain          | 34                  |
| Relaxation Delay       | 1.0000              |
| Pulse Width            | 0.0000              |
| Acquisition Date       | 2015-04-09 17:55:28 |
| Spectrometer Frequency | 75.45               |
| Spectral Width         | 18797.0             |
| Lowest Frequency       | -1627.8             |
| Nucleus                | <sup>13</sup> C     |
| Acquired Size          | 2955                |
| Spectral Size          | 65536               |

Supplementary Figure 104. <sup>13</sup>C NMR Spectrum of 3n.

crf-4-7-B-decoupling-CDCl<sub>3</sub>

32.606

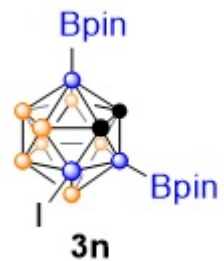

1.073  
0.433

4.589  
5.870

8.907

11.377

13.422

25.174

| Parameter              | Value                                     |
|------------------------|-------------------------------------------|
| Data File Name         | C:/Users/Administrator/Desktop/b-cr4-7/td |
| Title                  | Desktop                                   |
| Comment                |                                           |
| Origin                 | UMMR Bruker Analytische Messtechnik GmbH  |
| Owner                  | root                                      |
| Site                   |                                           |
| Spectrometer           | dx400                                     |
| Author                 |                                           |
| Solvent                | DMSO                                      |
| Temperature            | 300.0                                     |
| Pulse Sequence         | aring 1g                                  |
| Number of Scans        | 800                                       |
| Receiver Gain          | 32                                        |
| Relaxation Delay       | 0.0000                                    |
| Pulse Width            | 13.4000                                   |
| Acquisition Time       | 0.3155                                    |
| Acquisition Date       | 2015-03-20 15:27                          |
| Modification Date      | 2015-03-20 15:15:00                       |
| Spectrometer Frequency | 128.38                                    |
| Spectral Width         | 59.221                                    |
| Lowest Frequency       | 44462.3                                   |
| Nucleus                | <sup>11</sup> B                           |
| Acquired Size          | 16394                                     |
| Spectral Size          | 3268                                      |

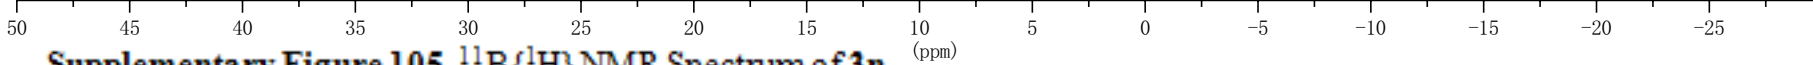

Supplementary Figure 105. <sup>11</sup>B{<sup>1</sup>H} NMR Spectrum of 3n.

crf-4-7-B-coupling-CDCl<sub>3</sub>

32.864

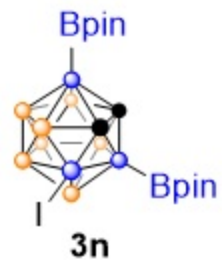

1.801

0.849

0.097

3.910

5.309

6.464

8.135

9.674

12.034

13.607

25.148

| Parameter              | Value                                                 |
|------------------------|-------------------------------------------------------|
| Data File Name         | C:/Users/Administrator/Desktop/b-cr-f4-7-coupling/fid |
| Title                  | Desktop                                               |
| Comment                |                                                       |
| Origin                 | UNMR Bruker Analytische Messtechnik GmbH              |
| Owner                  | root                                                  |
| Site                   |                                                       |
| Spectrometer           | dx400                                                 |
| Author                 |                                                       |
| Solvent                | DMSO                                                  |
| Temperature            | 300.0                                                 |
| Pulse Sequence         | aring.tgy                                             |
| Number of Scans        | 1600                                                  |
| Receiver Gain          | 32                                                    |
| Relaxation Delay       | 0.0000                                                |
| Pulse Width            | 13.4000                                               |
| Acquisition Time       | 0.395                                                 |
| Acquisition Date       | 2015-03-20 12:25:22                                   |
| Modification Date      | 2015-03-20 15:25:00                                   |
| Spectrometer Frequency | 128.38                                                |
| Spectral Width         | 59.221                                                |
| Lowest Frequency       | -444623                                               |
| Nucleus                | <sup>11</sup> B                                       |
| Acquired Size          | 16384                                                 |
| Spectral Size          | 3268                                                  |

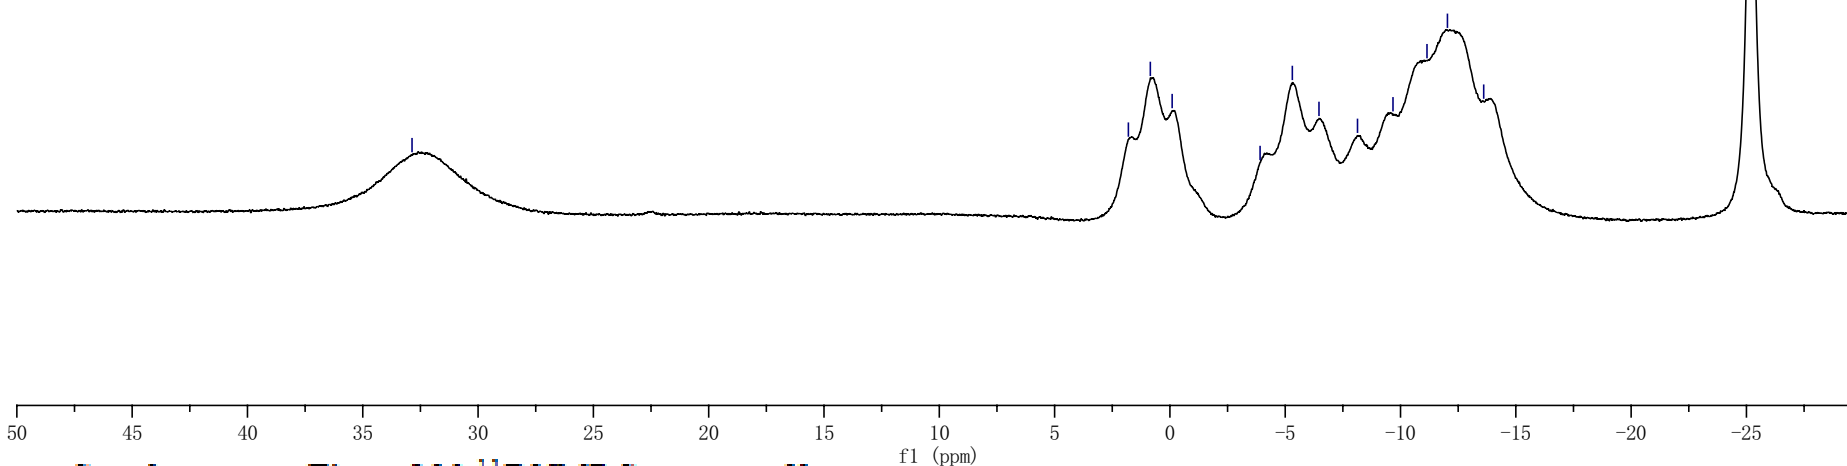

Supplementary Figure 106. <sup>11</sup>B NMR Spectrum of 3n.

crf-7-79-H-CDCl3

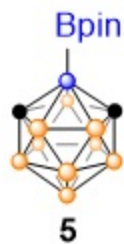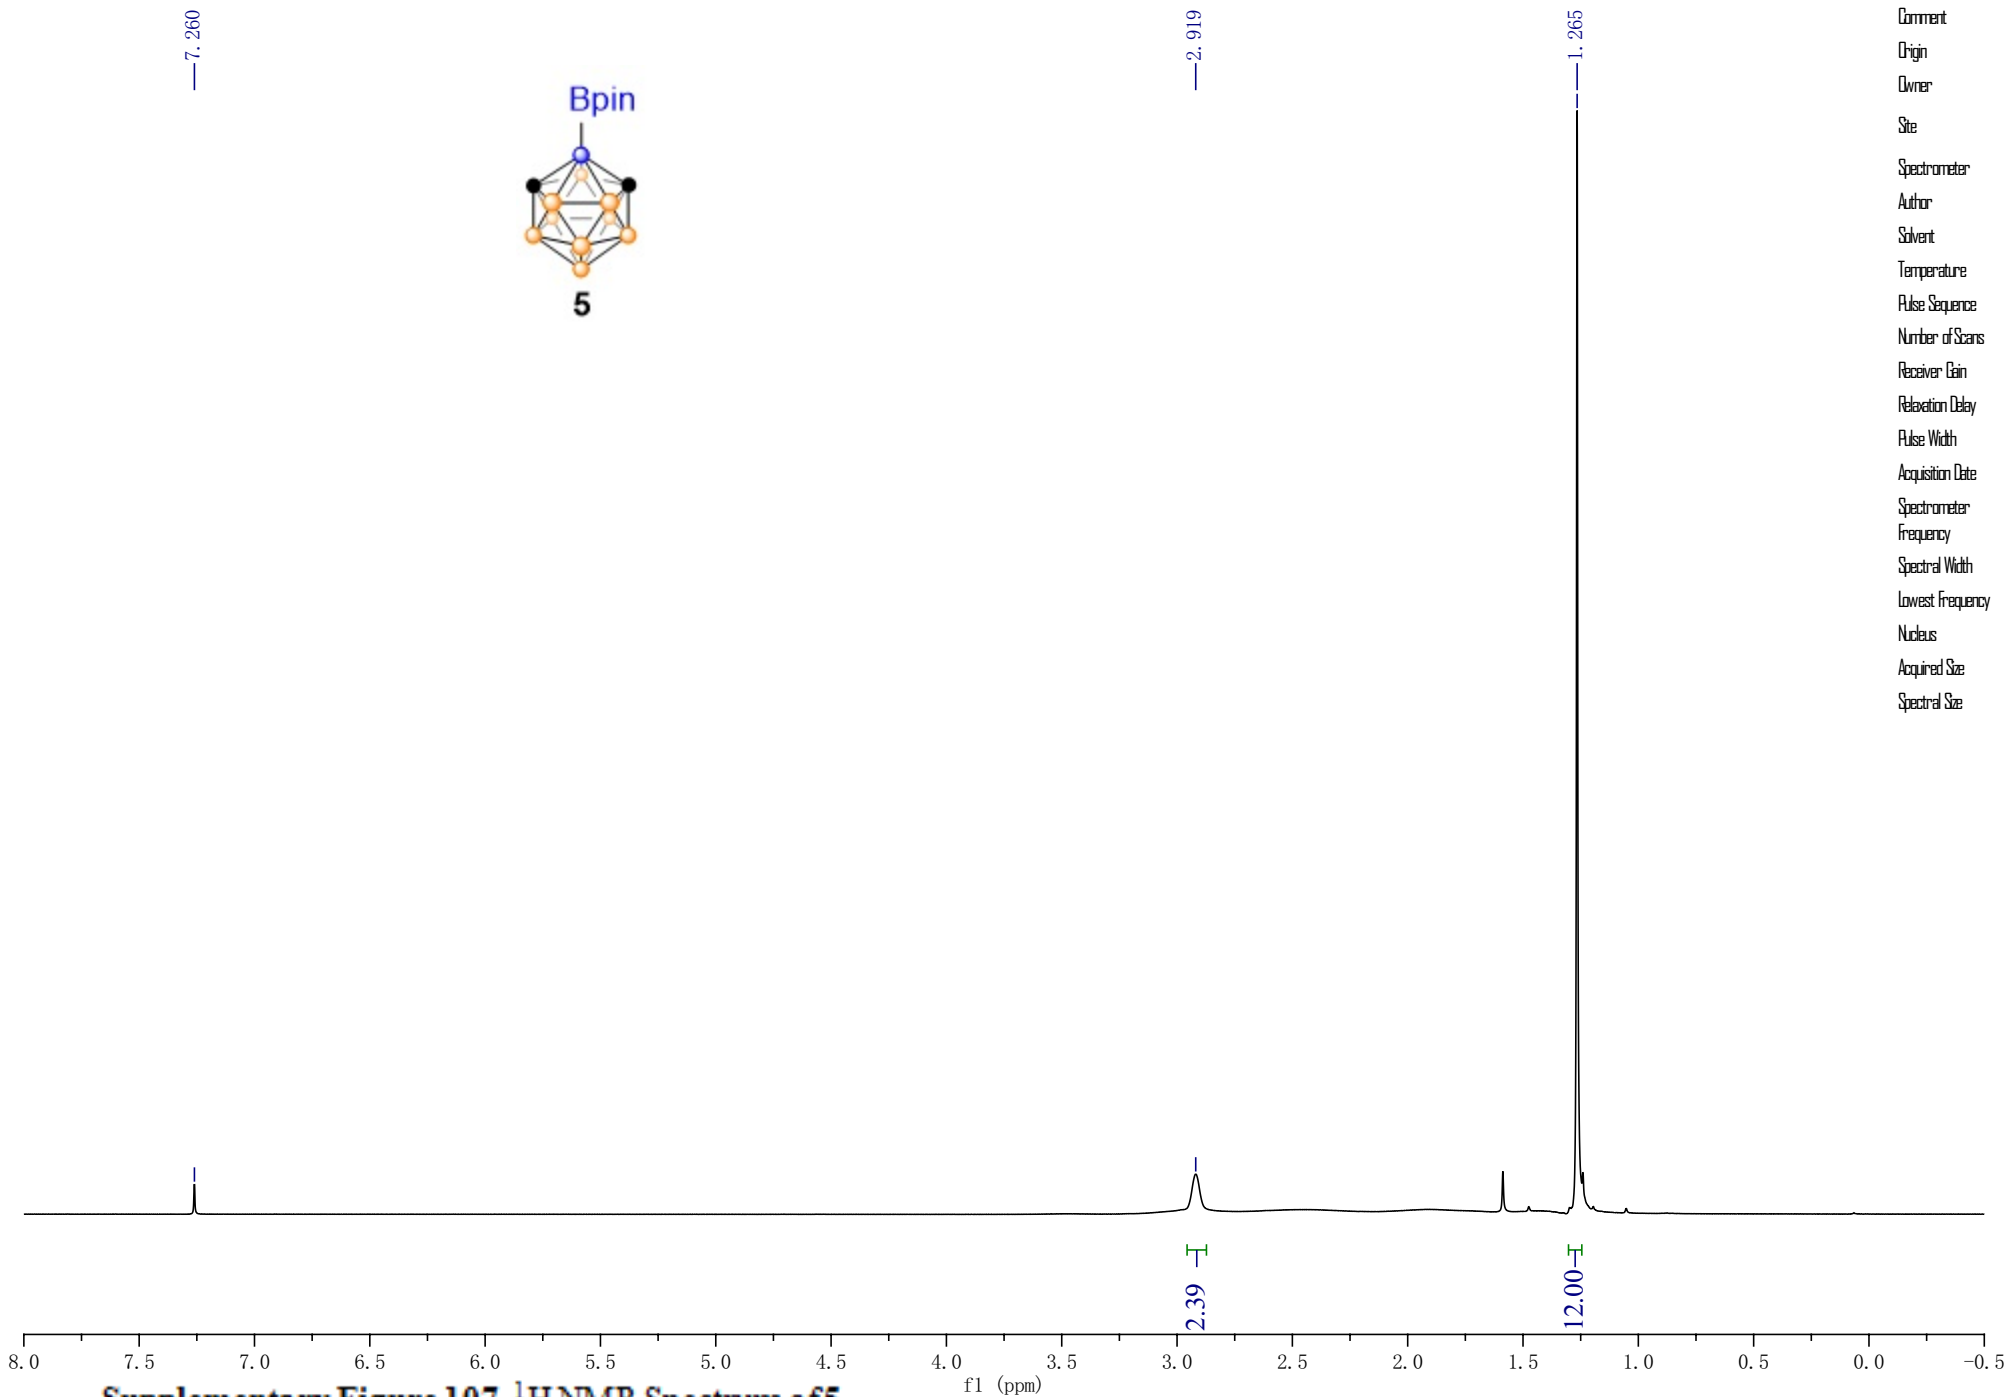

| Parameter              | Value               |
|------------------------|---------------------|
| Title                  | crf-7-79-H          |
| Comment                | STANDARD 1H OBSERVE |
| Origin                 | Varian              |
| Owner                  |                     |
| Site                   |                     |
| Spectrometer           | mercury             |
| Author                 | omc                 |
| Solvent                | CDCl3               |
| Temperature            | 28.0                |
| Pulse Sequence         | sziul               |
| Number of Scans        | 32                  |
| Receiver Gain          | 28                  |
| Relaxation Delay       | 1.0000              |
| Pulse Width            | 0.0000              |
| Acquisition Date       | 2016-01-14 08:36    |
| Spectrometer Frequency | 300.03              |
| Spectral Width         | 5494.5              |
| Lowest Frequency       | -70.2               |
| Nucleus                | 1H                  |
| Acquired Size          | 10888               |
| Spectral Size          | 3268                |

Supplementary Figure 107. <sup>1</sup>H NMR Spectrum of 5.



crf-7-79-C-CDCl3

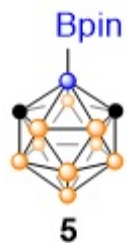

84.334  
77.677  
77.253  
76.830  
57.048  
25.021

| Parameter              | Value               |
|------------------------|---------------------|
| Title                  | crf-7-79-C          |
| Comment                | 13C OBSERVE         |
| Origin                 | Varian              |
| Owner                  |                     |
| Site                   |                     |
| Spectrometer           | mercury             |
| Author                 | omc                 |
| Solvent                | CDCl3               |
| Temperature            | 29.0                |
| Pulse Sequence         | sZul                |
| Number of Scans        | 80                  |
| Receiver Gain          | 38                  |
| Relaxation Delay       | 1.0000              |
| Pulse Width            | 0.0000              |
| Acquisition Date       | 2016-01-07 15:04:54 |
| Spectrometer Frequency | 76.45               |
| Spectral Width         | 2949.8              |
| Lowest Frequency       | -215.2              |
| Nucleus                | 13C                 |
| Acquired Size          | 30738               |
| Spectral Size          | 65536               |

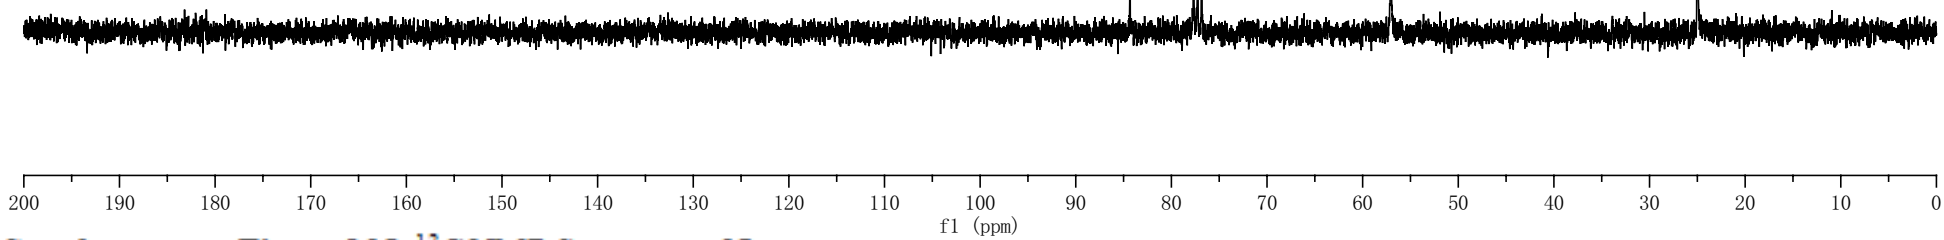

Supplementary Figure 108. <sup>13</sup>C NMR Spectrum of 5.

crf-7-79-B-decoupling-CDC13

34.596

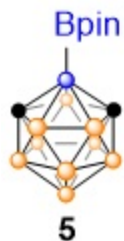

-5.018

-7.980

-11.098

-15.188

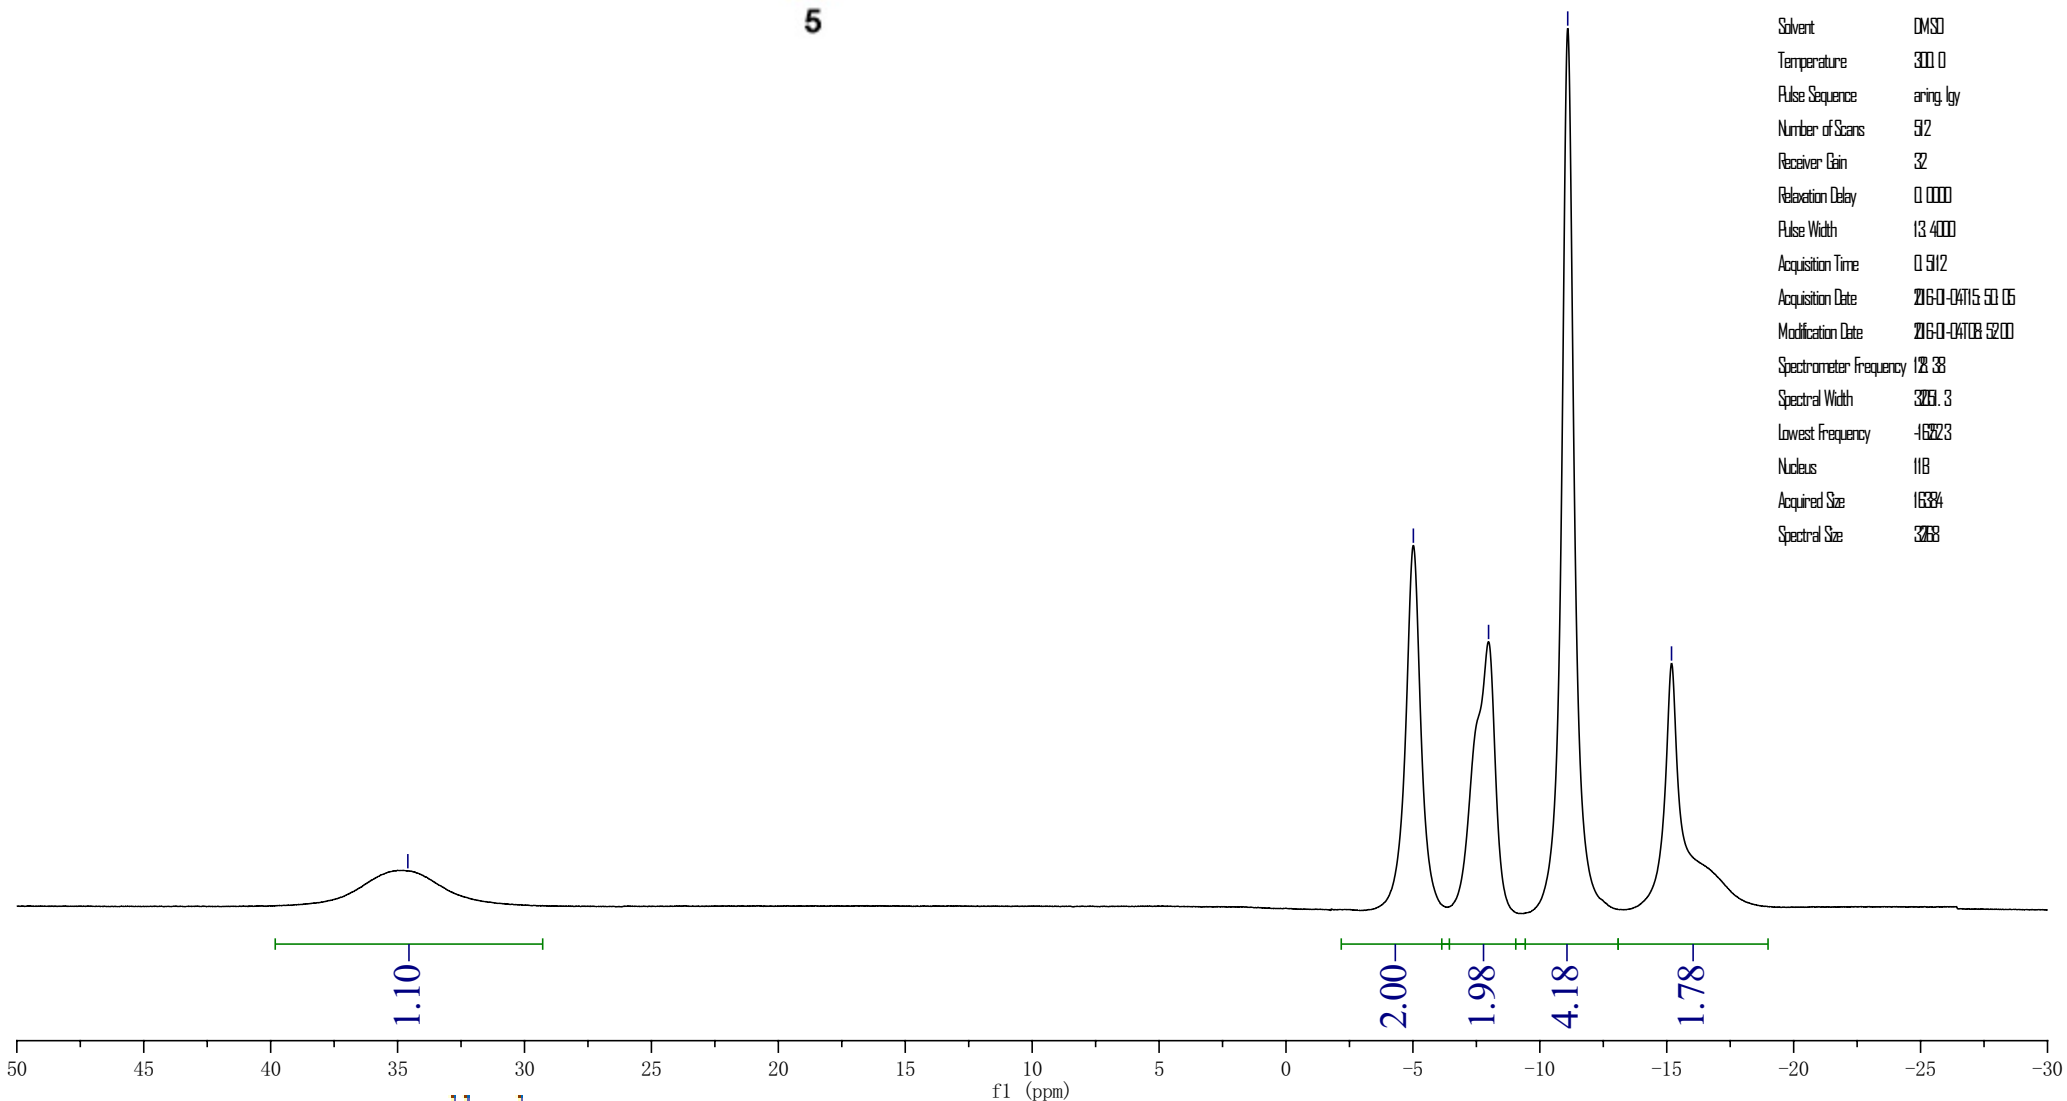

| Parameter              | Value                                       |
|------------------------|---------------------------------------------|
| Data File Name         | C:/Users/Administrator/Desktop/b-crff79/ftd |
| Title                  | Desktop                                     |
| Comment                |                                             |
| Origin                 | UNMR Bruker Analytische Messtechnik GmbH    |
| Owner                  | root                                        |
| Site                   |                                             |
| Spectrometer           | dx400                                       |
| Author                 |                                             |
| Solvent                | DMSO                                        |
| Temperature            | 300.0                                       |
| Pulse Sequence         | aring1g                                     |
| Number of Scans        | 512                                         |
| Receiver Gain          | 32                                          |
| Relaxation Delay       | 0.0000                                      |
| Pulse Width            | 13.4000                                     |
| Acquisition Time       | 0.512                                       |
| Acquisition Date       | 2016-03-04 15:50:05                         |
| Modification Date      | 2016-03-04 18:52:00                         |
| Spectrometer Frequency | 128.38                                      |
| Spectral Width         | 3061.3                                      |
| Lowest Frequency       | -1682.3                                     |
| Nucleus                | 11B                                         |
| Acquired Size          | 16384                                       |
| Spectral Size          | 3263                                        |

Supplementary Figure 109.  $^{11}\text{B}\{^1\text{H}\}$  NMR Spectrum of 5.

crf-7-79-B-coupling-CDC13

—34.584

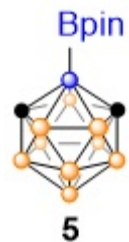

—4.392  
—5.654  
—7.429  
—8.566  
—10.466  
—11.739  
—14.494  
—15.888

| Parameter              | Value                                                 |
|------------------------|-------------------------------------------------------|
| Data File Name         | E:/Users/Administrator/Desktop/b-crf-7-79-coupling/1d |
| Title                  | Desktop                                               |
| Comment                |                                                       |
| Origin                 | UNMR Bruker Analytische Messtechnik GmbH              |
| Owner                  | root                                                  |
| Site                   |                                                       |
| Spectrometer           | dx400                                                 |
| Author                 |                                                       |
| Solvent                | DMSO                                                  |
| Temperature            | 300.0                                                 |
| Pulse Sequence         | aring1gy                                              |
| Number of Scans        | 512                                                   |
| Receiver Gain          | 32                                                    |
| Relaxation Delay       | 0.0000                                                |
| Pulse Width            | 13.4000                                               |
| Acquisition Time       | 0.512                                                 |
| Acquisition Date       | 2016-04-15 44:53                                      |
| Modification Date      | 2016-04-15 48:00                                      |
| Spectrometer Frequency | 128.33                                                |
| Spectral Width         | 3281.3                                                |
| Lowest Frequency       | -16282.3                                              |
| Nucleus                | <sup>11</sup> B                                       |
| Acquired Size          | 16384                                                 |
| Spectral Size          | 3288                                                  |

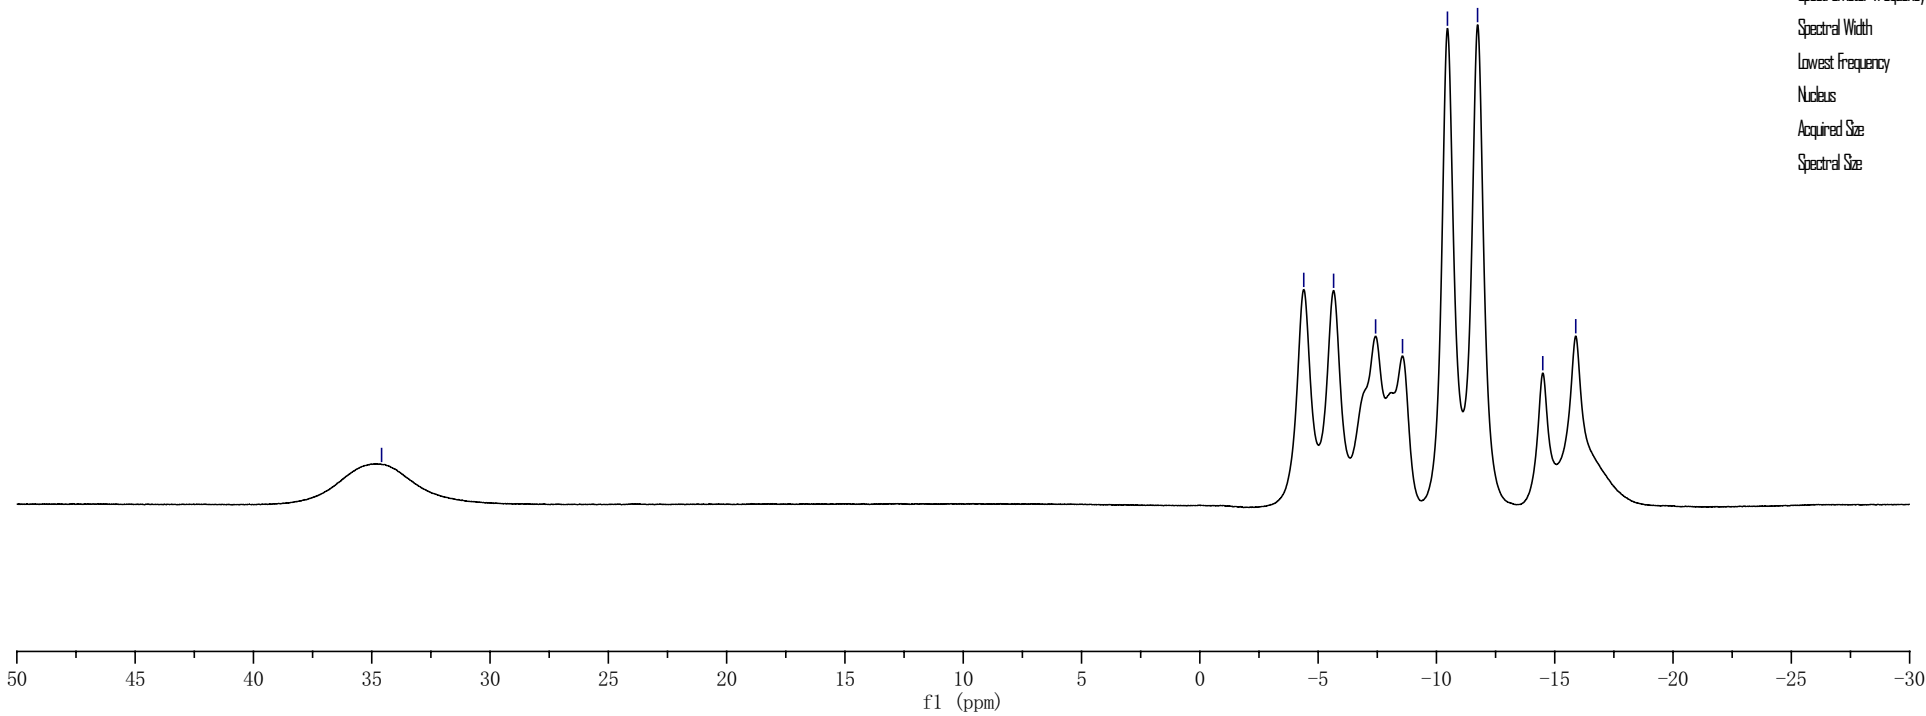

Supplementary Figure 110. <sup>11</sup>B NMR Spectrum of 5.

crf-7-70-1-H-CDCl3

| Parameter              | Value            |
|------------------------|------------------|
| Title                  | crf-7-70-1-H     |
| Comment                | STANDARD OBSERVE |
| Origin                 | Varian           |
| Owner                  |                  |
| Site                   |                  |
| Spectrometer           | mercury          |
| Author                 | cmc              |
| Solvent                | CDCl3            |
| Temperature            | 28.0             |
| Pulse Sequence         | zgpg30           |
| Number of Scans        | 12               |
| Receiver Gain          | 24               |
| Relaxation Delay       | 1.0000           |
| Pulse Width            | 0.0000           |
| Acquisition Date       | 2015-12-28 22:52 |
| Spectrometer Frequency | 300.03           |
| Spectral Width         | 5494.5           |
| Lowest Frequency       | -70.8            |
| Nucleus                | 1H               |
| Acquired Size          | 10888            |
| Spectral Size          | 3068             |

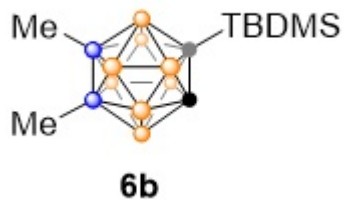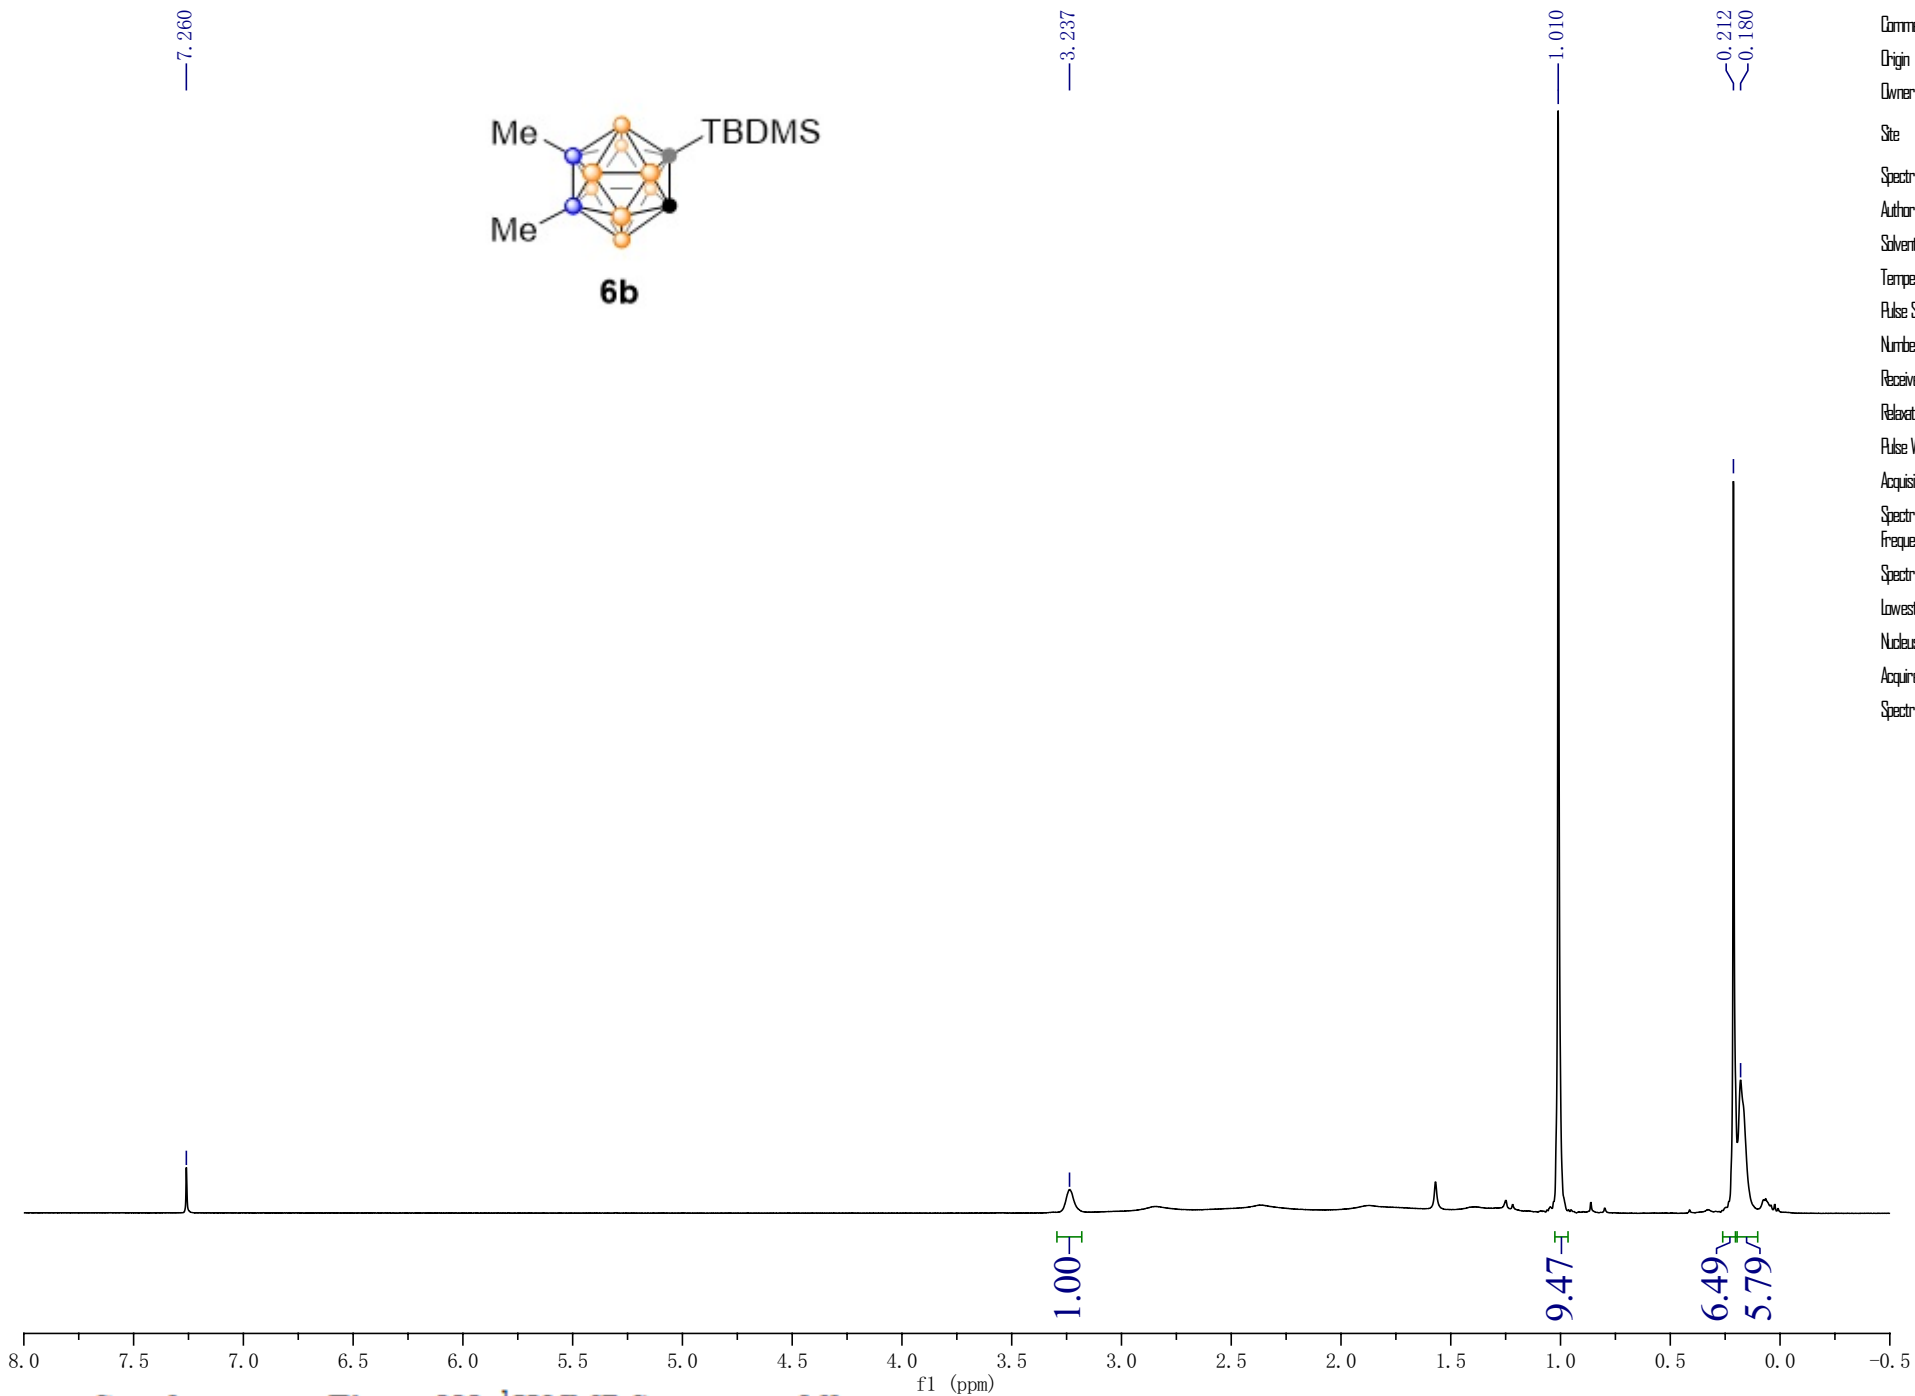

Supplementary Figure 111. <sup>1</sup>H NMR Spectrum of **6b**.

crf-7-70-1-C-CDCl3

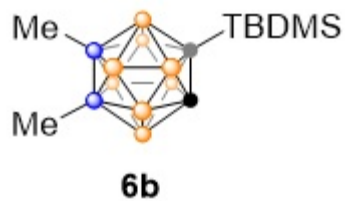

77.192  
76.766  
76.340

56.704  
53.199

26.776

19.060

-4.690

| Parameter              | Value            |
|------------------------|------------------|
| Title                  | crf7704-C        |
| Comment                | 13C OBSERVE      |
| Origin                 | Varian           |
| Owner                  |                  |
| Site                   |                  |
| Spectrometer           | mercury          |
| Author                 | omc              |
| Solvent                | CDCl3            |
| Temperature            | 21.0             |
| Pulse Sequence         | sgpl             |
| Number of Scans        | 132              |
| Receiver Gain          | 38               |
| Relaxation Delay       | 1.0000           |
| Pulse Width            | 0.0000           |
| Acquisition Date       | 2015/22/28 03:58 |
| Spectrometer Frequency | 75.45            |
| Spectral Width         | 2749.8           |
| Lowest Frequency       | -285.2           |
| Nucleus                | 13C              |
| Acquired Size          | 31738            |
| Spectral Size          | 65536            |

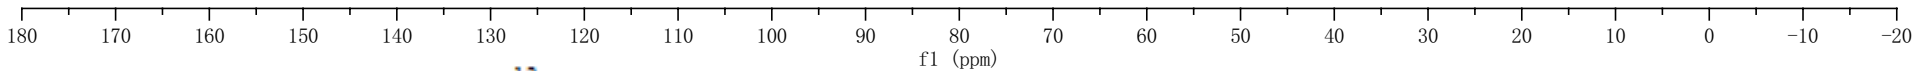

Supplementary Figure 112. <sup>13</sup>C NMR Spectrum of 6b.

S133

crf-7-70-1-B-decoupling-CDC13

9.961

7.866

-5.190

-10.748

-12.424

-14.733

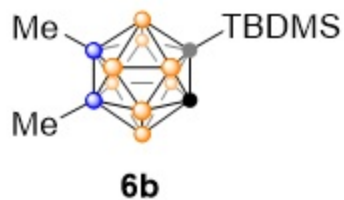

| Parameter              | Value                                                         |
|------------------------|---------------------------------------------------------------|
| Data file Name         | G:/Users/Administrator/Desktop/2135b-cr7701/2135b-cr7701/1/1d |
| Title                  | 2135b-cr7701                                                  |
| Comment                |                                                               |
| Origin                 | UNMR Bruker Analytische Messtechnik GmbH                      |
| Owner                  | root                                                          |
| Site                   |                                                               |
| Spectrometer           | dr400                                                         |
| Author                 |                                                               |
| Solvent                | DMSO                                                          |
| Temperature            | 300.0                                                         |
| Pulse Sequence         | aring.1g                                                      |
| Number of Scans        | 512                                                           |
| Receiver Gain          | 32                                                            |
| Relaxation Delay       | 0.0000                                                        |
| Pulse Width            | 13.4000                                                       |
| Acquisition Time       | 0.512                                                         |
| Acquisition Date       | 2015/28/19 07:33                                              |
| Modification Date      | 2015/28/13 50:15                                              |
| Spectrometer Frequency | 128.38                                                        |
| Spectral Width         | 326.3                                                         |
| Lowest Frequency       | -16823                                                        |
| Nucleus                | 11B                                                           |
| Acquired Size          | 16384                                                         |
| Spectral Size          | 3268                                                          |

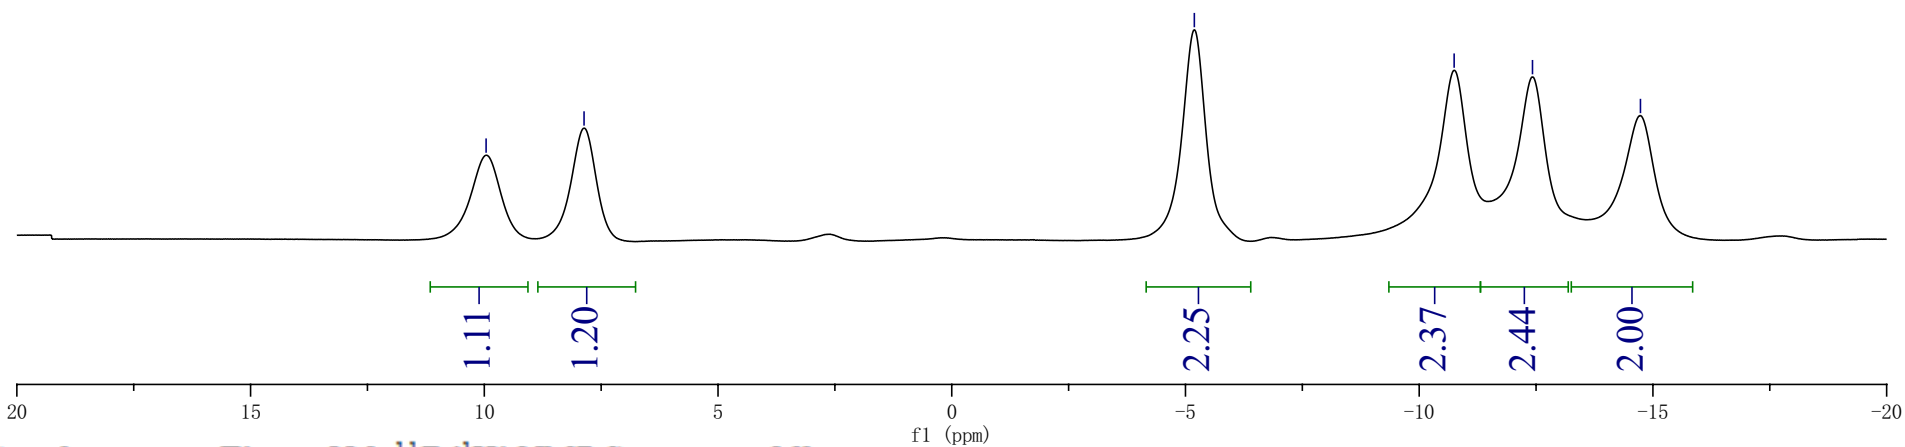

Supplementary Figure 113.  $^{11}\text{B}\{^1\text{H}\}$  NMR Spectrum of **6b**.

crf-7-70-1-B-coupling-CDCl3

9.940

7.854

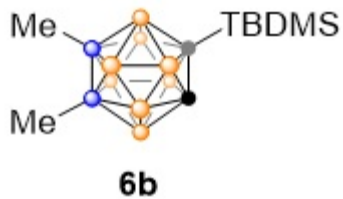

4.632

5.766

10.155

11.535

13.056

14.057

15.404

| Parameter              | Value                                                                     |
|------------------------|---------------------------------------------------------------------------|
| Data File Name         | C:/Users/Administrator/Desktop/2135b-crf7701/2135b-crf7701-coupling/1/fid |
| Title                  | 2135b-crf7701-coupling                                                    |
| Comment                |                                                                           |
| Origin                 | UNMR Bruker Analytische Messtechnik GmbH                                  |
| Owner                  | root                                                                      |
| Site                   |                                                                           |
| Spectrometer           | dx400                                                                     |
| Author                 |                                                                           |
| Solvent                | DMSO                                                                      |
| Temperature            | 300.0                                                                     |
| Pulse Sequence         | aring.1g                                                                  |
| Number of Scans        | 100                                                                       |
| Receiver Gain          | 32                                                                        |
| Relaxation Delay       | 0.0000                                                                    |
| Pulse Width            | 13.4000                                                                   |
| Acquisition Time       | 0.912                                                                     |
| Acquisition Date       | 2015/28/19 15:50                                                          |
| Modification Date      | 2015/28/13 50:10                                                          |
| Spectrometer Frequency | 128.38                                                                    |
| Spectral Width         | 326.3                                                                     |
| Lowest Frequency       | -16323                                                                    |
| Nucleus                | 11B                                                                       |
| Acquired Size          | 16394                                                                     |
| Spectral Size          | 3268                                                                      |

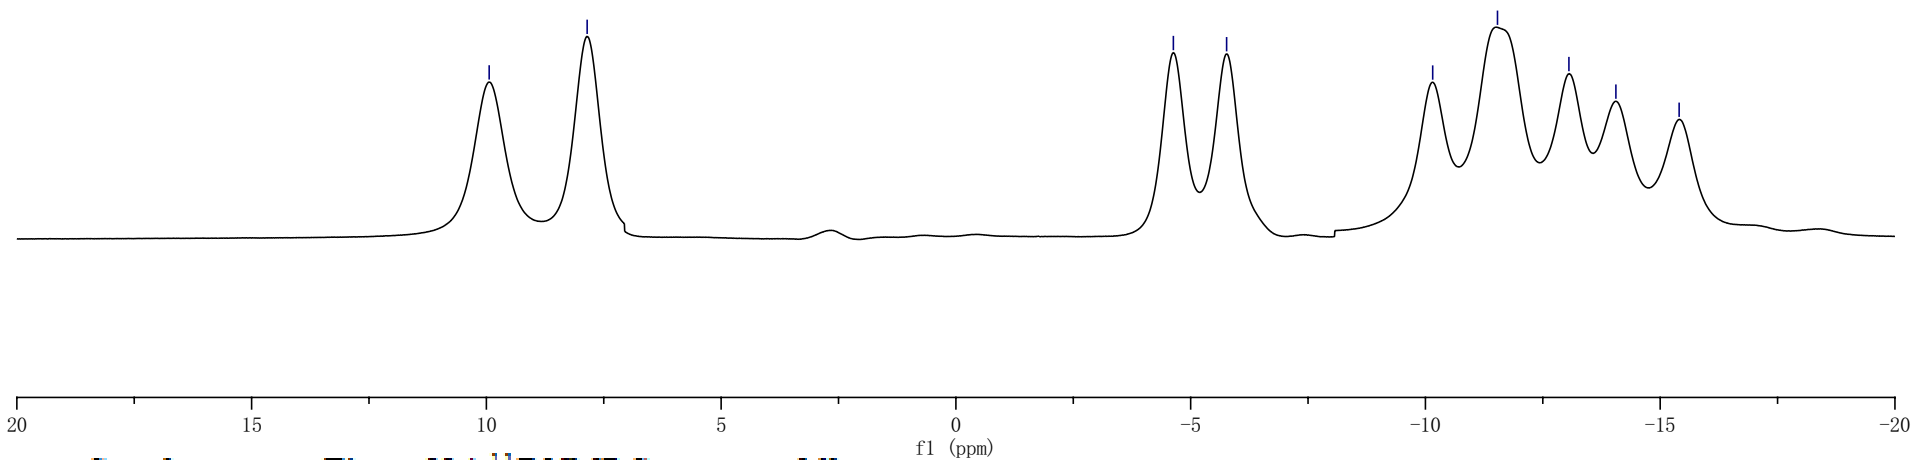

Supplementary Figure 114. <sup>11</sup>B NMR Spectrum of **6b**.

crf-7-50-2-H-CDC13

7.260

3.826

1.026

0.249

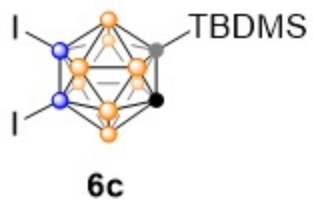

| Parameter              | Value               |
|------------------------|---------------------|
| Title                  | crf7502             |
| Comment                | STANDARD 1H OBSERVE |
| Origin                 | Varian              |
| Owner                  |                     |
| Site                   |                     |
| Spectrometer           | mercury             |
| Author                 | omc                 |
| Solvent                | CDCl3               |
| Temperature            | 28.0                |
| Pulse Sequence         | sgzg                |
| Number of Scans        | 8                   |
| Receiver Gain          | 32                  |
| Relaxation Delay       | 1.000               |
| Pulse Width            | 0.000               |
| Acquisition Date       | 2015/05/16 2: 07    |
| Spectrometer Frequency | 300.03              |
| Spectral Width         | 5494.5              |
| Lowest Frequency       | -70.5               |
| Nucleus                | 1H                  |
| Acquired Size          | 10888               |
| Spectral Size          | 3268                |

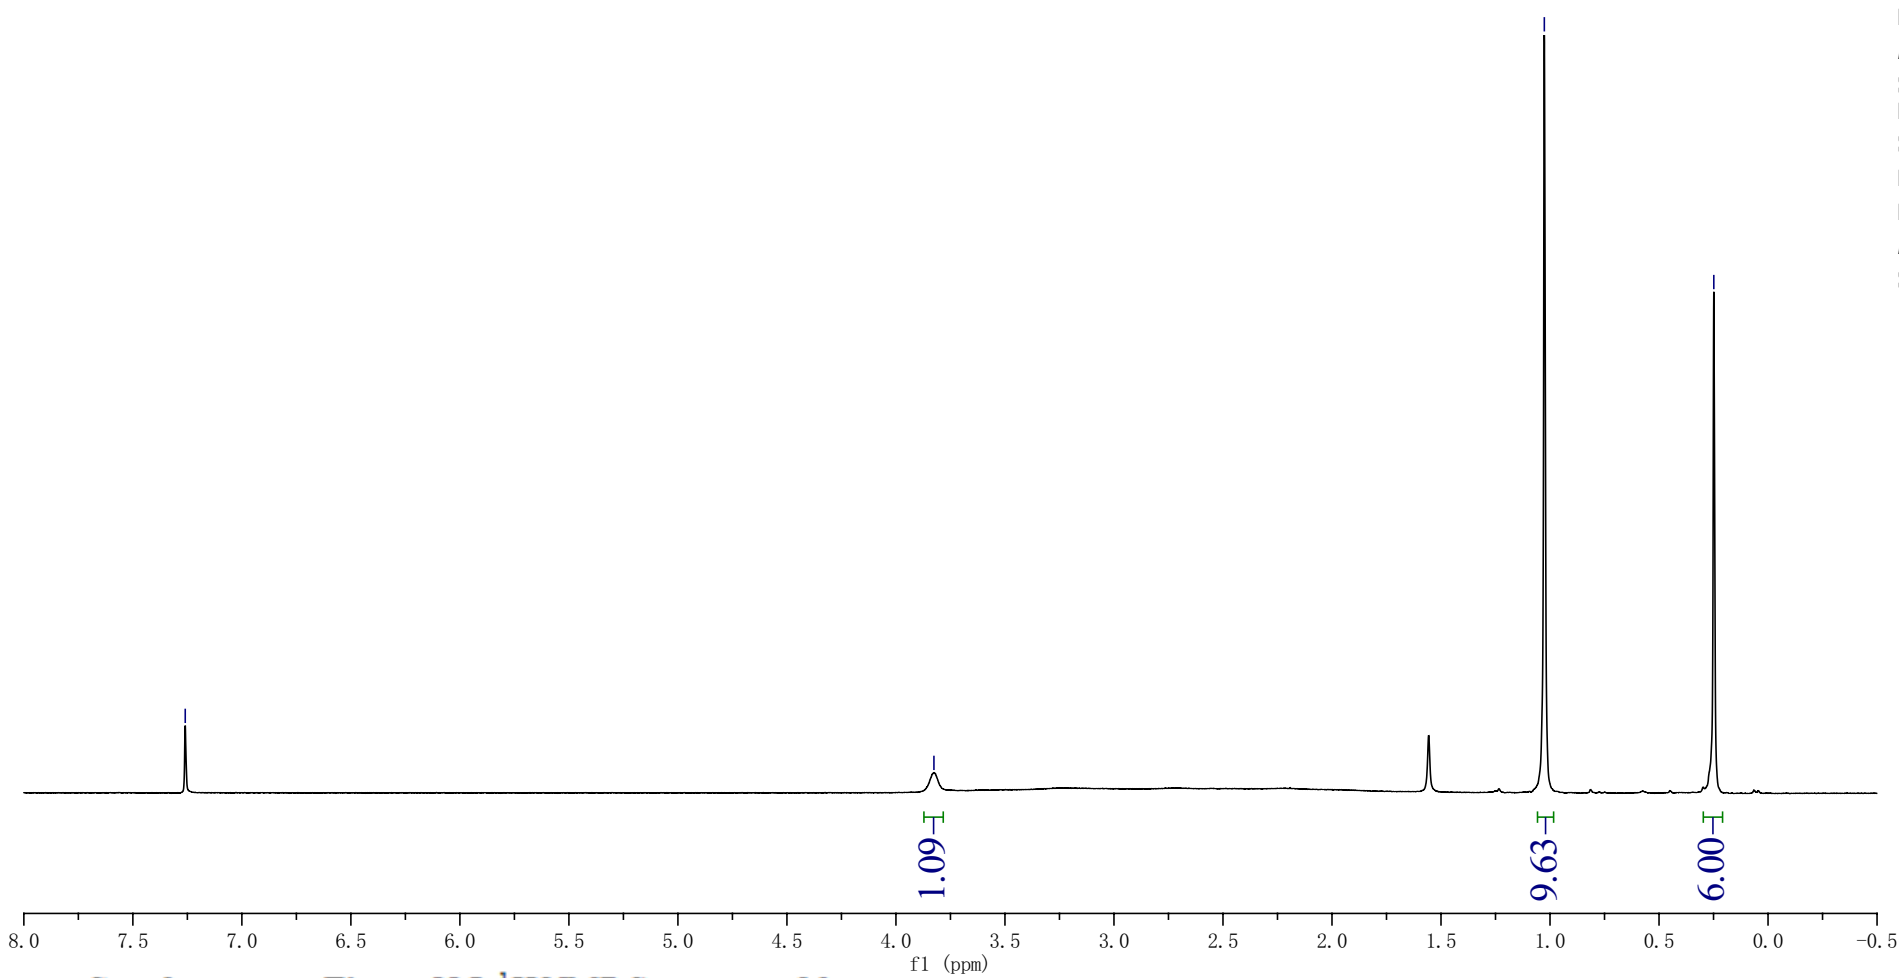

Supplementary Figure 115. <sup>1</sup>H NMR Spectrum of 6c.



crf-7-50-2-H-CDCl3

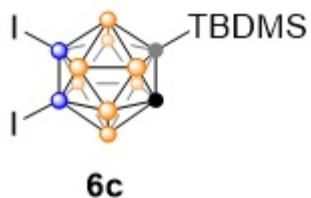

77.761  
77.337  
76.913

62.351

57.471

27.186

19.597

-4.140

| Parameter              | Value           |
|------------------------|-----------------|
| Title                  | crf7-50-2c      |
| Comment                | 13C OBSERVE     |
| Origin                 | Varien          |
| Owner                  |                 |
| Site                   |                 |
| Spectrometer           | mercury         |
| Author                 | omc             |
| Solvent                | CDCl3           |
| Temperature            | 21.0            |
| Pulse Sequence         | zgpg30          |
| Number of Scans        | 60              |
| Receiver Gain          | 38              |
| Relaxation Delay       | 1.0000          |
| Pulse Width            | 0.0000          |
| Acquisition Date       | 2014/2/16 12:55 |
| Spectrometer Frequency | 75.45           |
| Spectral Width         | 299.8           |
| Lowest Frequency       | -285.2          |
| Nucleus                | 13C             |
| Acquired Size          | 30736           |
| Spectral Size          | 65536           |

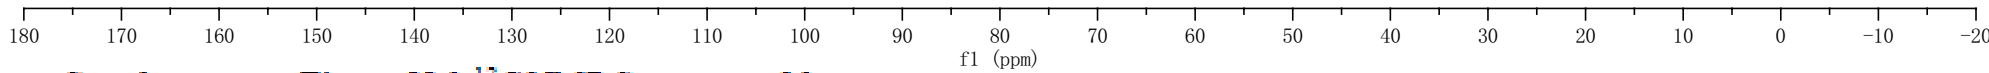

Supplementary Figure 116. <sup>13</sup>C NMR Spectrum of **6c**.

crf-7-50-2-B-decoupling-CDC13

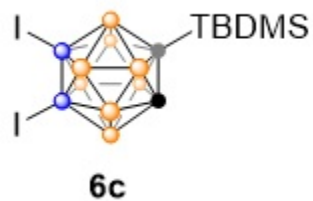

| Parameter              | Value                                             |
|------------------------|---------------------------------------------------|
| Data File Name         | C:/Users/Administrator/Desktop/2135b-crf75021/fid |
| Title                  | 2135b-crf7502                                     |
| Comment                |                                                   |
| Origin                 | LNMNR Bruker Analytische Messtechnik GmbH         |
| Owner                  | root                                              |
| Site                   |                                                   |
| Spectrometer           | dx400                                             |
| Author                 |                                                   |
| Solvent                | DMSO                                              |
| Temperature            | 300.0                                             |
| Pulse Sequence         | aring.tgy                                         |
| Number of Scans        | 92                                                |
| Receiver Gain          | 32                                                |
| Relaxation Delay       | 0.0000                                            |
| Pulse Width            | 13.4000                                           |
| Acquisition Time       | 0.512                                             |
| Acquisition Date       | 2015/22/12 18:54                                  |
| Modification Date      | 2015/22/14 21:56                                  |
| Spectrometer Frequency | 128.38                                            |
| Spectral Width         | 326.3                                             |
| Lowest Frequency       | -16666.1                                          |
| Nucleus                | 11B                                               |
| Acquired Size          | 16384                                             |
| Spectral Size          | 3268                                              |

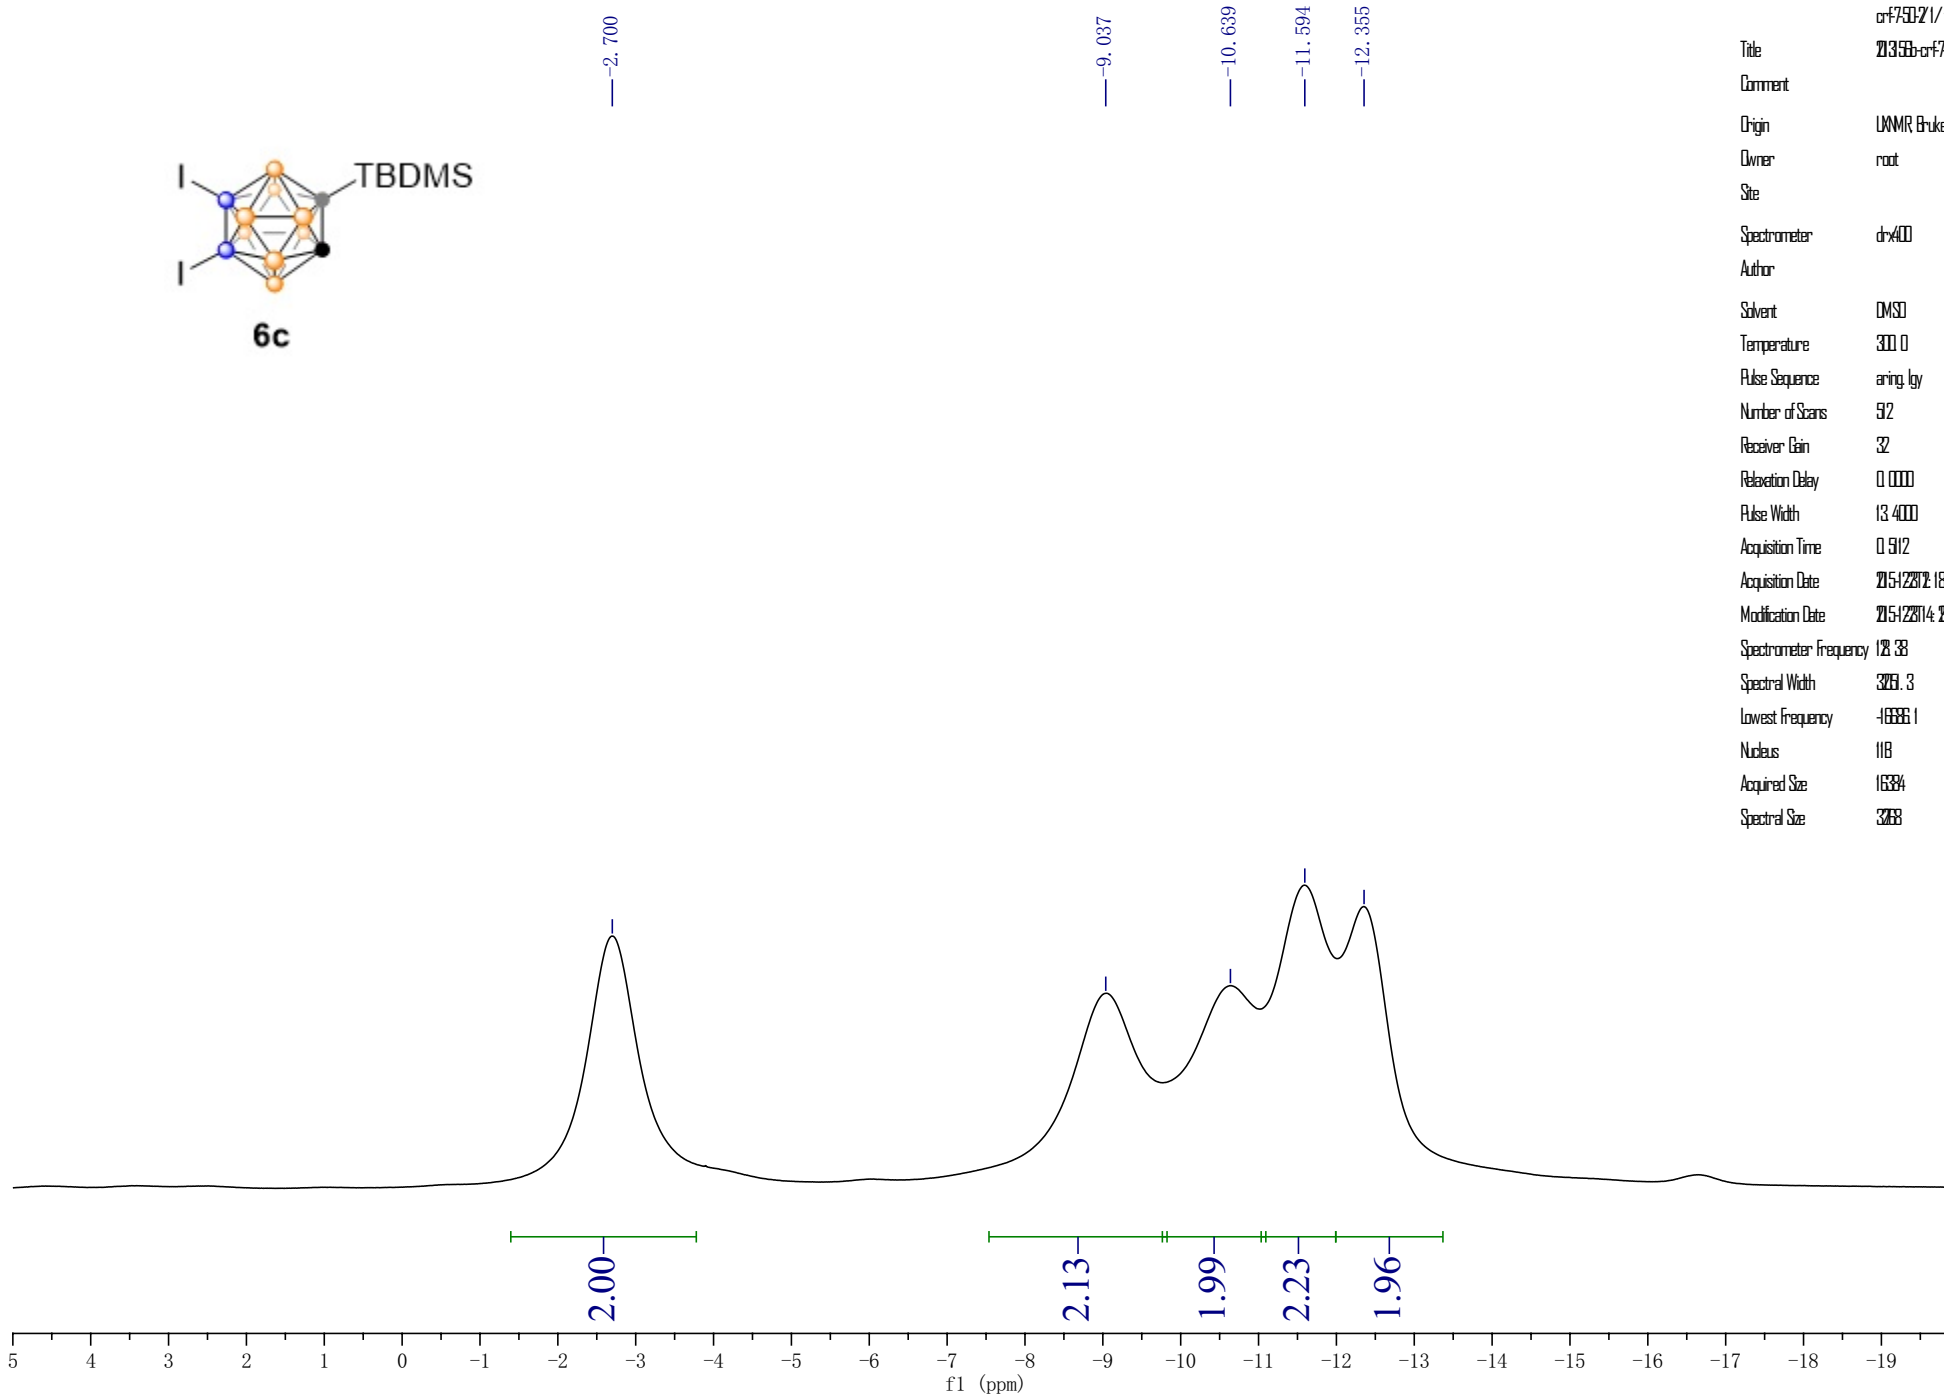

Supplementary Figure 117.  $^{11}\text{B}\{^1\text{H}\}$  NMR Spectrum of **6c**.

crf-7-50-2-B-coupling-CDCl3

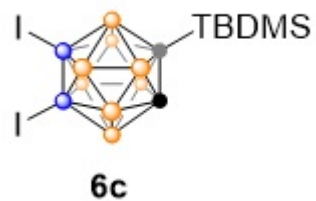

-2.050      -3.271

-8.364      -9.771      -11.418      -12.363

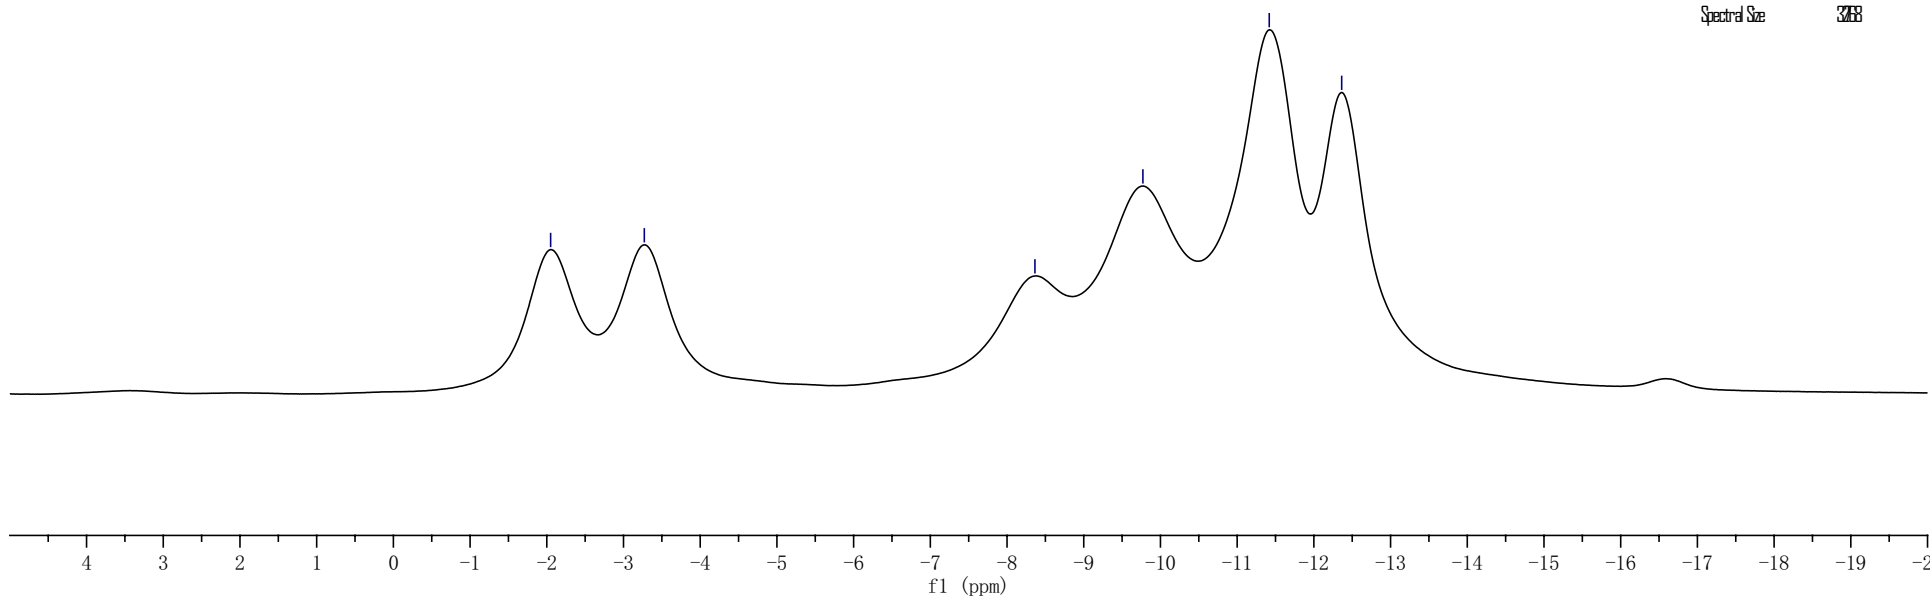

| Parameter              | Value                                                                                |
|------------------------|--------------------------------------------------------------------------------------|
| Data File Name         | C:/Users/Administrator/Desktop/work/送样<br>NMR/correlation/7502/b-crf7502coupling/fid |
| Title                  | 7502                                                                                 |
| Comment                |                                                                                      |
| Origin                 | UNMR Bruker Analytische Messtechnik GmbH                                             |
| Owner                  | root                                                                                 |
| Site                   |                                                                                      |
| Spectrometer           | dx400                                                                                |
| Author                 |                                                                                      |
| Solvent                | DMSO                                                                                 |
| Temperature            | 300.0                                                                                |
| Pulse Sequence         | aring1gy                                                                             |
| Number of Scans        | 512                                                                                  |
| Receiver Gain          | 32                                                                                   |
| Relaxation Delay       | 0.0000                                                                               |
| Pulse Width            | 13.4000                                                                              |
| Acquisition Time       | 0.512                                                                                |
| Acquisition Date       | 2016-04-11T18:00:2                                                                   |
| Modification Date      | 2016-04-11T11:00:00                                                                  |
| Spectrometer Frequency | 128.38                                                                               |
| Spectral Width         | 3261.3                                                                               |
| Lowest Frequency       | -16223                                                                               |
| Nucleus                | 11B                                                                                  |
| Acquired Size          | 16394                                                                                |
| Spectral Size          | 3268                                                                                 |

Supplementary Figure 118. <sup>11</sup>B NMR Spectrum of 6c.

crf-7-48-H-CDCl3

7.260

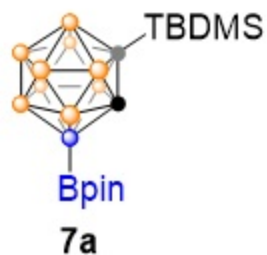

3.459

1.236  
1.229

1.012

0.227  
0.220

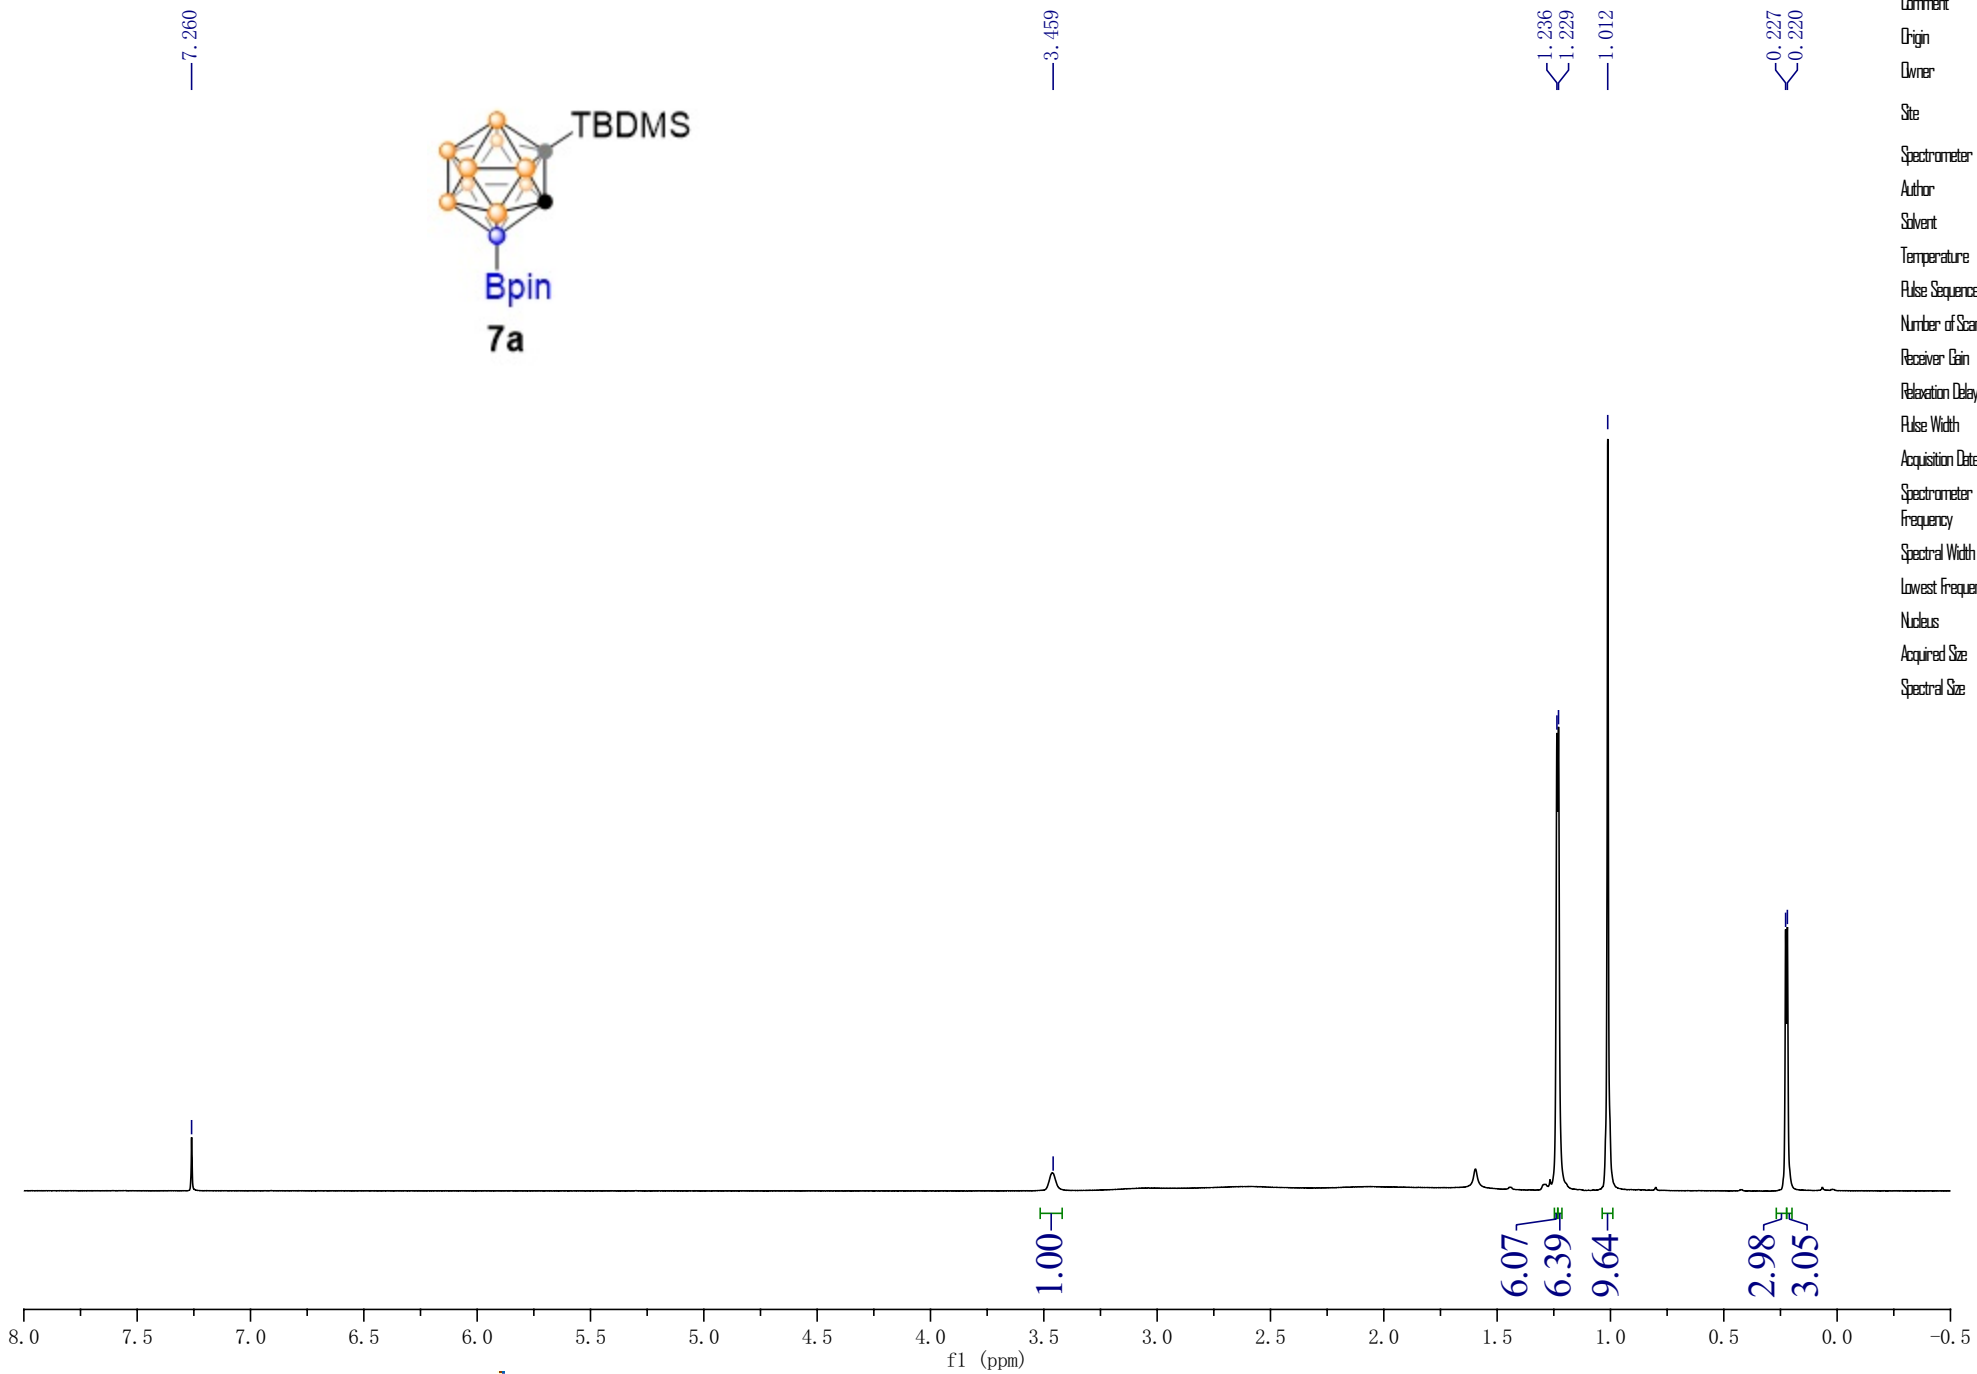

| Parameter              | Value               |
|------------------------|---------------------|
| Title                  | crf748H             |
| Comment                | STANDARD 1H OBSERVE |
| Origin                 | Varian              |
| Owner                  |                     |
| Site                   |                     |
| Spectrometer           | mercury             |
| Author                 | omc                 |
| Solvent                | CDCl3               |
| Temperature            | 21.0                |
| Pulse Sequence         | sgzb                |
| Number of Scans        | 12                  |
| Receiver Gain          | 30                  |
| Relaxation Delay       | 1.000               |
| Pulse Width            | 0.000               |
| Acquisition Date       | 2015/23/08 21:2     |
| Spectrometer Frequency | 300.03              |
| Spectral Width         | 5494.5              |
| Lowest Frequency       | -71.1               |
| Nucleus                | 1H                  |
| Acquired Size          | 10888               |
| Spectral Size          | 3288                |

Supplementary Figure 119. <sup>1</sup>H NMR Spectrum of 7a.

crf-7-48-C-CDCl3

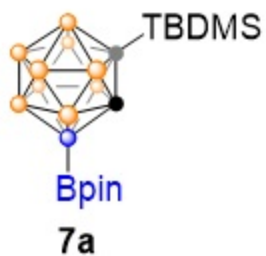

83.693  
77.692  
77.269  
76.845  
67.717  
62.006

27.177  
25.117  
24.943  
19.522

-4.315

| Parameter              | Value                   |
|------------------------|-------------------------|
| Title                  | crf-7-48-C              |
| Comment                | <sup>13</sup> C OBSERVE |
| Origin                 | Varian                  |
| Owner                  |                         |
| Site                   |                         |
| Spectrometer           | mercury                 |
| Author                 | omc                     |
| Solvent                | CDCl3                   |
| Temperature            | 21.0                    |
| Pulse Sequence         | zgpg30                  |
| Number of Scans        | 120                     |
| Receiver Gain          | 38                      |
| Relaxation Delay       | 1.0000                  |
| Pulse Width            | 0.0000                  |
| Acquisition Date       | 2015/23/10 4:43:00      |
| Spectrometer Frequency | 76.46                   |
| Spectral Width         | 2949.8                  |
| Lowest Frequency       | -285.2                  |
| Nucleus                | <sup>13</sup> C         |
| Acquired Size          | 30736                   |
| Spectral Size          | 65536                   |

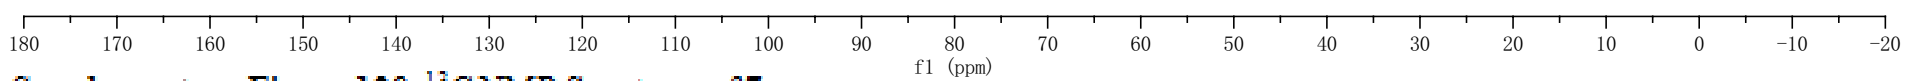

Supplementary Figure 120. <sup>13</sup>C NMR Spectrum of 7a.

crf-7-48-B-decoupling-CDCl3

34.278

0.678

1.048

5.850

9.799

10.895

12.362

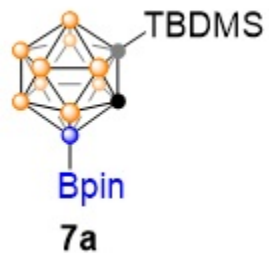

| Parameter              | Value                                      |
|------------------------|--------------------------------------------|
| Data File Name         | E:/Users/Administrator/Desktop/b-cr748/fid |
| Title                  | Desktop                                    |
| Comment                |                                            |
| Origin                 | LWMR Bruker Analytische Messtechnik GmbH   |
| Owner                  | root                                       |
| Site                   |                                            |
| Spectrometer           | dx400                                      |
| Author                 |                                            |
| Solvent                | DMSO                                       |
| Temperature            | 300.0                                      |
| Pulse Sequence         | aring.1g                                   |
| Number of Scans        | 26                                         |
| Receiver Gain          | 32                                         |
| Relaxation Delay       | 0.0000                                     |
| Pulse Width            | 13.4000                                    |
| Acquisition Time       | 0.512                                      |
| Acquisition Date       | 2015/23/11 8:45:0                          |
| Modification Date      | 2015/23/11: 45:00                          |
| Spectrometer Frequency | 128.38                                     |
| Spectral Width         | 3261.3                                     |
| Lowest Frequency       | -16406.2                                   |
| Nucleus                | 11B                                        |
| Acquired Size          | 16384                                      |
| Spectral Size          | 3268                                       |

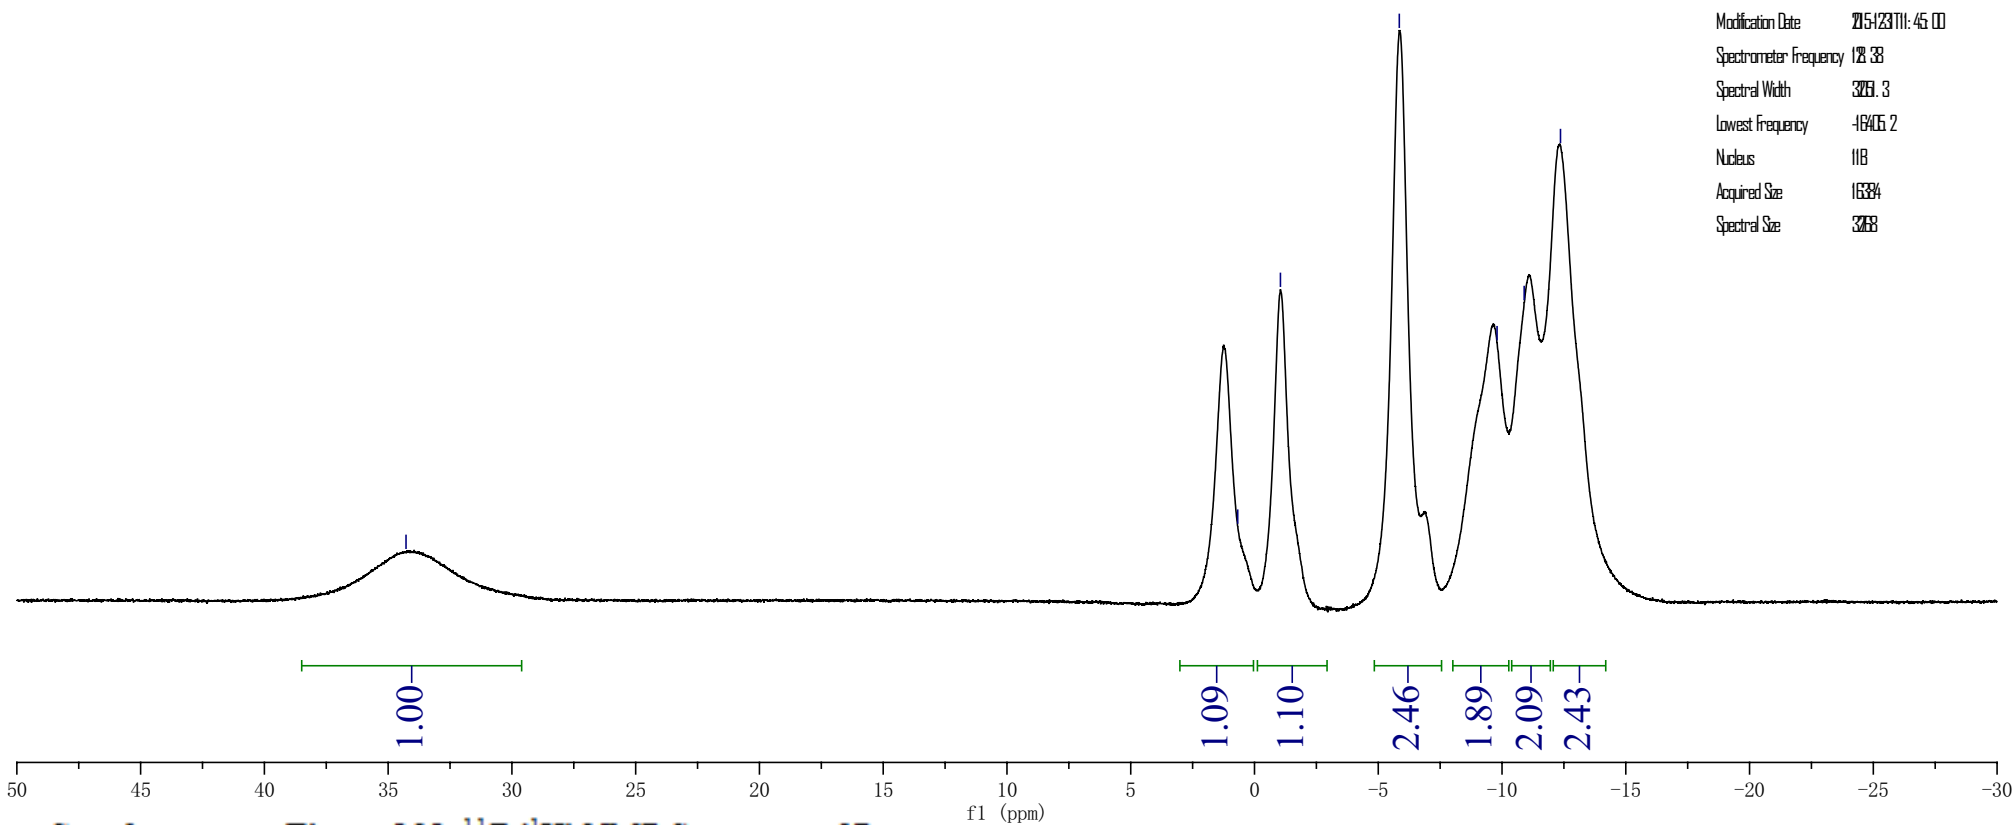

Supplementary Figure 121.  $^{11}\text{B}\{^1\text{H}\}$  NMR Spectrum of **7a**.

crf-7-48-B-decoupling-CDC13

34.049

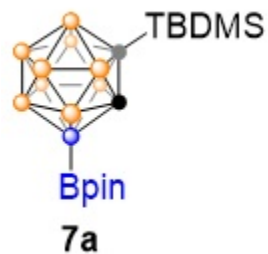

1.811  
0.625  
-0.534  
-1.651  
-5.263  
-6.406  
-9.095  
-10.328  
-11.773  
-12.743

| Parameter              | Value                                                |
|------------------------|------------------------------------------------------|
| Data File Name         | C:/Users/Administrator/Desktop/b-cr7-48-coupling/fid |
| Title                  | Desktop                                              |
| Comment                |                                                      |
| Origin                 | LWMR Bruker Analytische Messtechnik GmbH             |
| Owner                  | root                                                 |
| Site                   |                                                      |
| Spectrometer           | drx400                                               |
| Author                 |                                                      |
| Solvent                | DMSO                                                 |
| Temperature            | 300.0                                                |
| Pulse Sequence         | aring1gy                                             |
| Number of Scans        | 335                                                  |
| Receiver Gain          | 32                                                   |
| Relaxation Delay       | 0.0000                                               |
| Pulse Width            | 13.4000                                              |
| Acquisition Time       | 0.912                                                |
| Acquisition Date       | 2015/23/18:48:44                                     |
| Modification Date      | 2015/23/11:48:00                                     |
| Spectrometer Frequency | 128.38                                               |
| Spectral Width         | 3263.3                                               |
| Lowest Frequency       | -16405.2                                             |
| Nucleus                | <sup>11</sup> B                                      |
| Acquired Size          | 16384                                                |
| Spectral Size          | 3268                                                 |

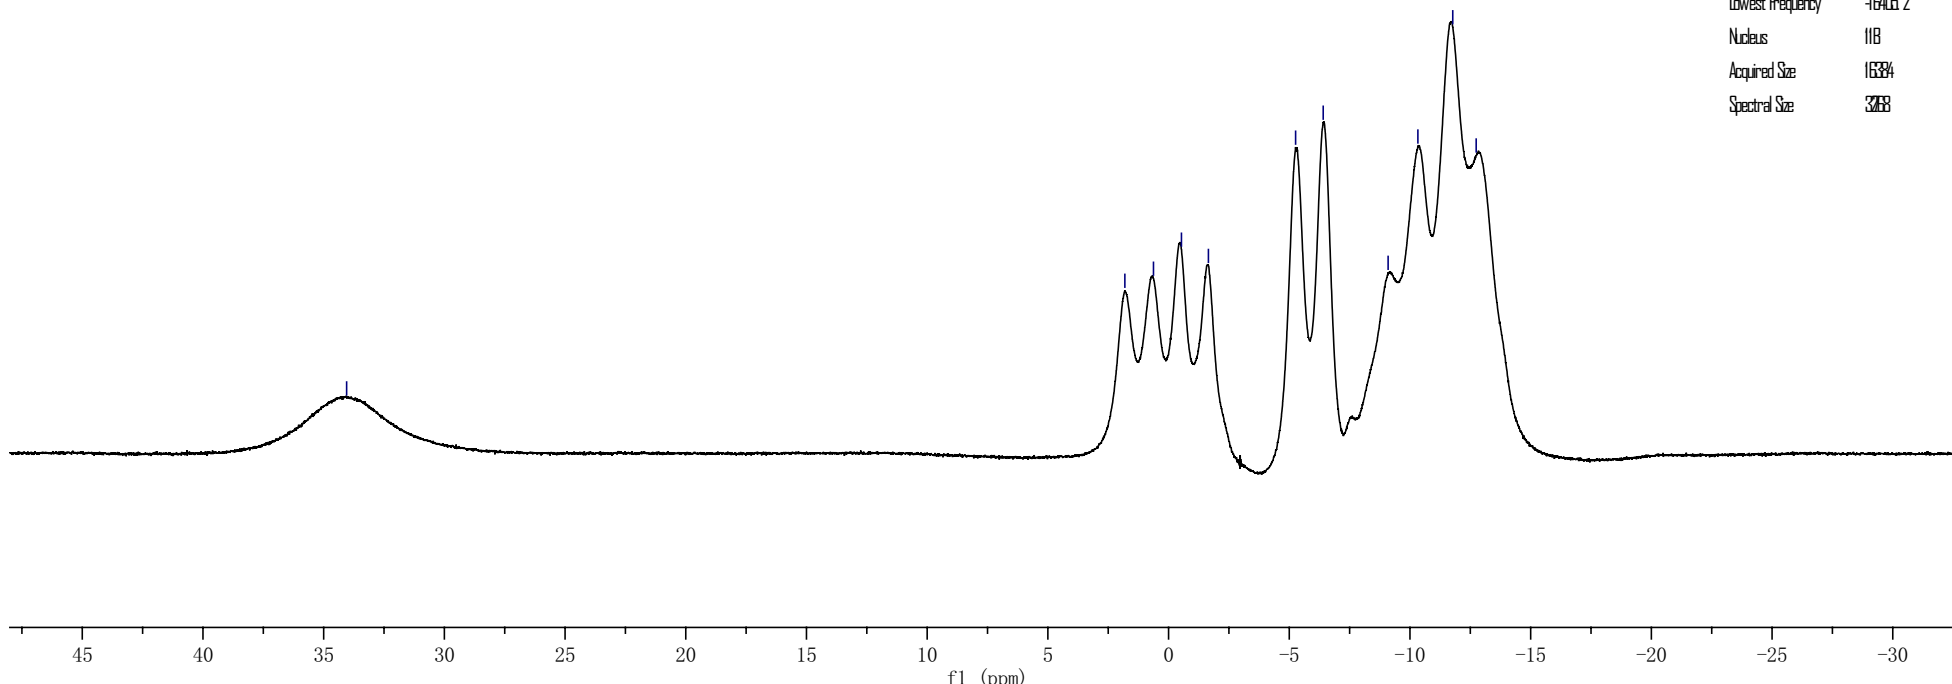

Supplementary Figure 22. <sup>11</sup>B NMR Spectrum of 7a.

crf-7-74-H-CDCl3

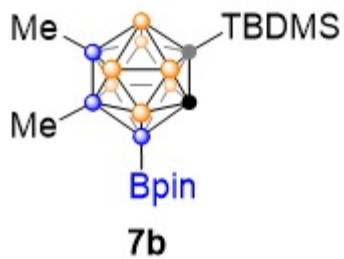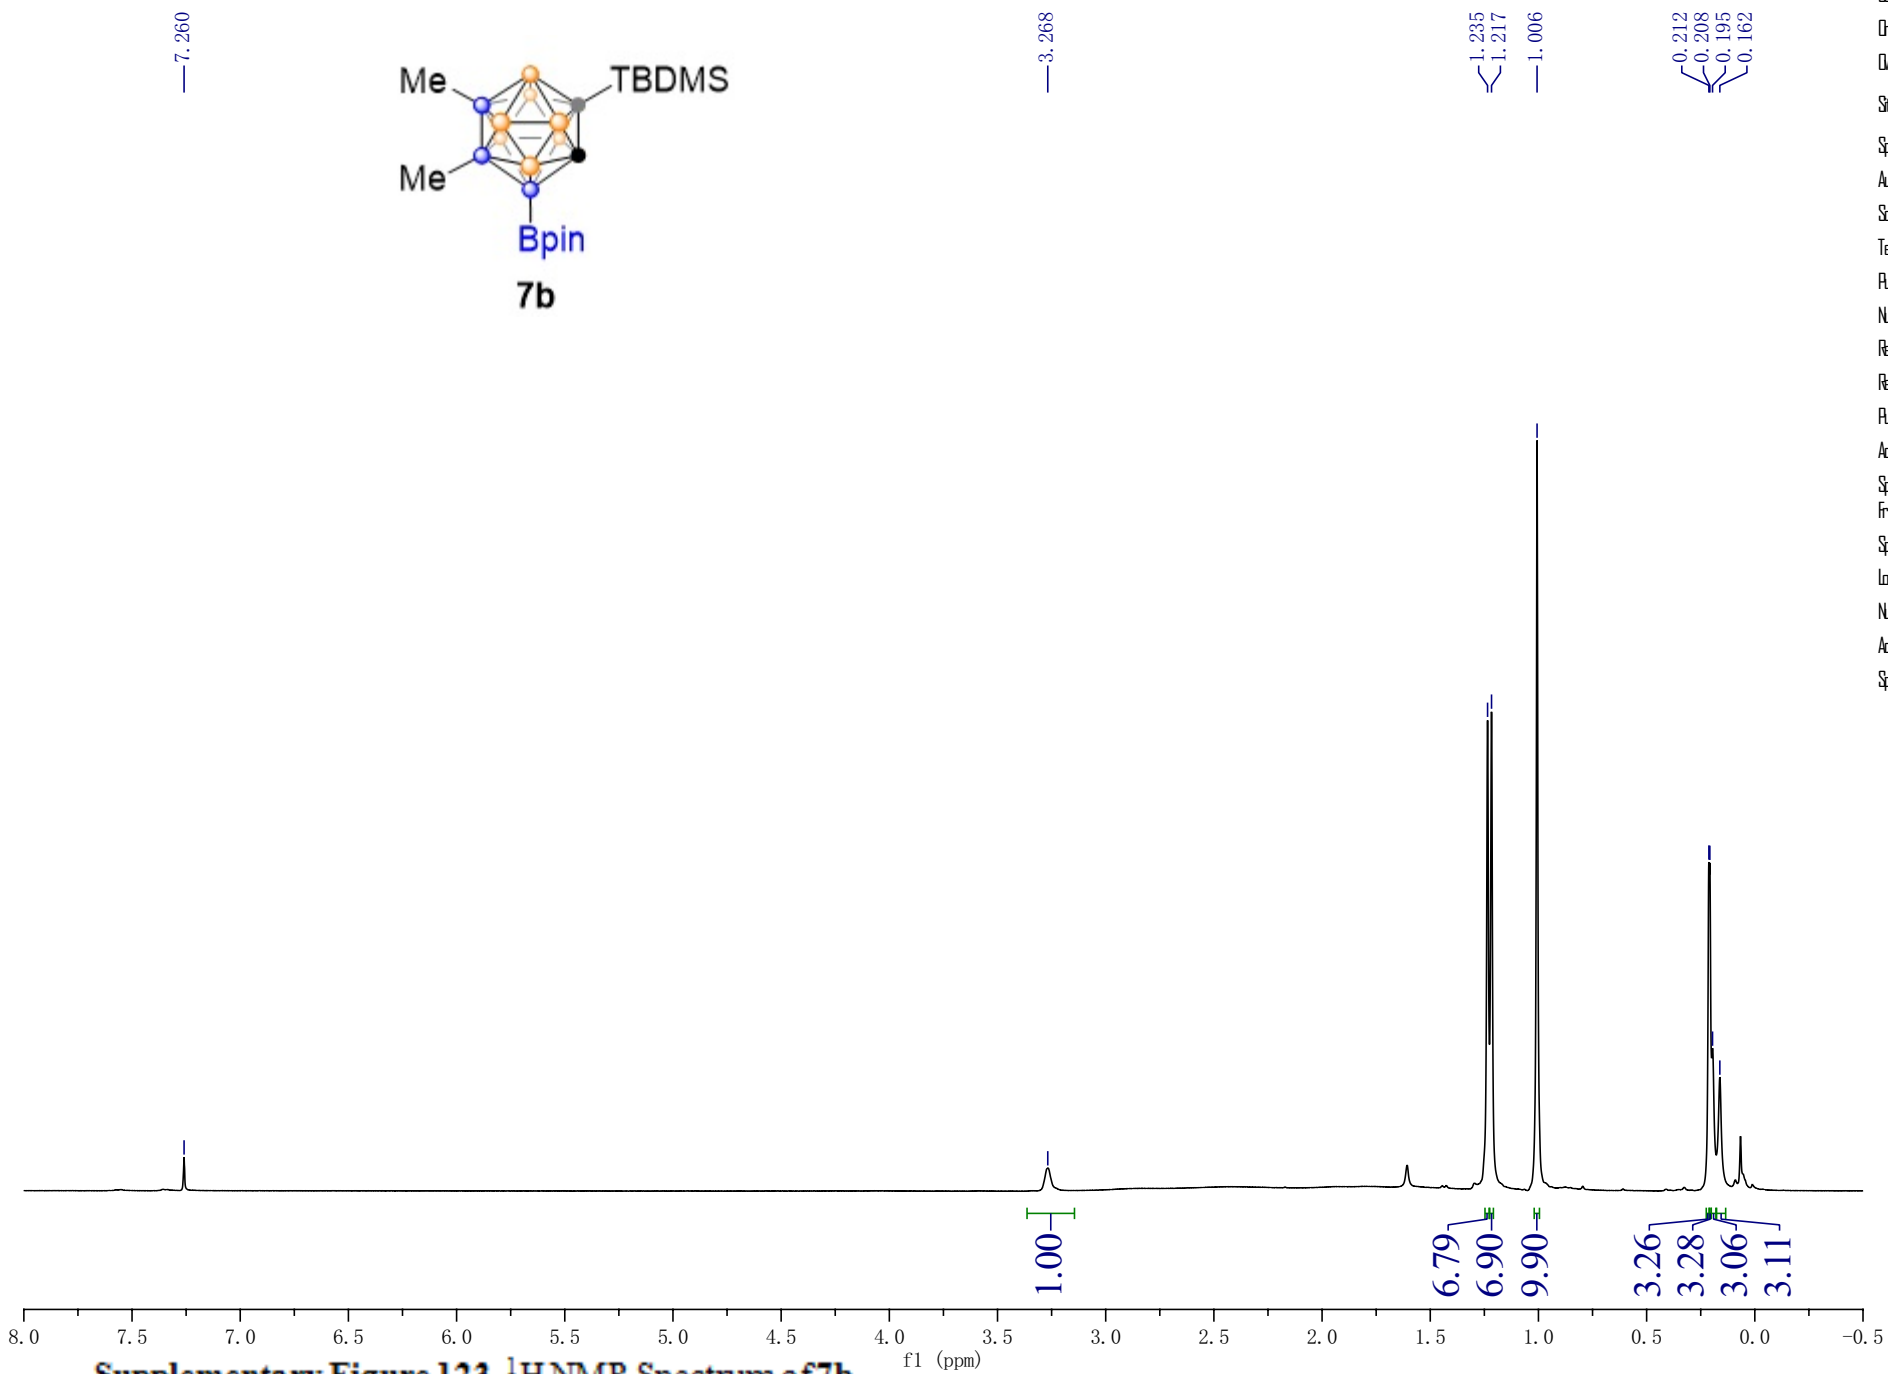

| Parameter              | Value               |
|------------------------|---------------------|
| Title                  | crf77A-H            |
| Comment                | STANDARD 1H OBSERVE |
| Origin                 | Varian              |
| Owner                  |                     |
| Site                   |                     |
| Spectrometer           | mercury             |
| Author                 | omc                 |
| Solvent                | CDCl3               |
| Temperature            | 28.0                |
| Pulse Sequence         | squl                |
| Number of Scans        | 12                  |
| Receiver Gain          | 2                   |
| Relaxation Delay       | 1.0000              |
| Pulse Width            | 0.0000              |
| Acquisition Date       | 20151231 09:33:45   |
| Spectrometer Frequency | 300.03              |
| Spectral Width         | 5494.5              |
| Lowest Frequency       | -71.1               |
| Nucleus                | 1H                  |
| Acquired Size          | 10888               |
| Spectral Size          | 3268                |

Supplementary Figure 123. <sup>1</sup>H NMR Spectrum of 7b.



crf-7-74-C-CDCl3

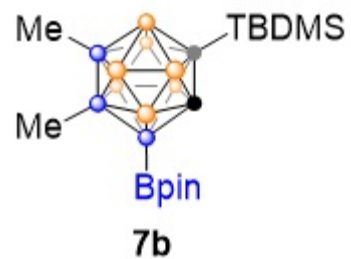

83.377

77.685

77.261

76.837

59.048

55.186

27.224

25.271

24.819

19.513

-4.191

| Parameter              | Value                   |
|------------------------|-------------------------|
| Title                  | crf-774-C               |
| Comment                | <sup>13</sup> C OBSERVE |
| Origin                 | Varian                  |
| Owner                  |                         |
| Site                   |                         |
| Spectrometer           | mercury                 |
| Author                 | omc                     |
| Solvent                | CDCl3                   |
| Temperature            | 28.0                    |
| Pulse Sequence         | zgpg30                  |
| Number of Scans        | 84                      |
| Receiver Gain          | 38                      |
| Relaxation Delay       | 1.0000                  |
| Pulse Width            | 0.0000                  |
| Acquisition Date       | 2015-03-10 08:53:43     |
| Spectrometer Frequency | 76.45                   |
| Spectral Width         | 2991.8                  |
| Lowest Frequency       | -285.2                  |
| Nucleus                | <sup>13</sup> C         |
| Acquired Size          | 30736                   |
| Spectral Size          | 65536                   |

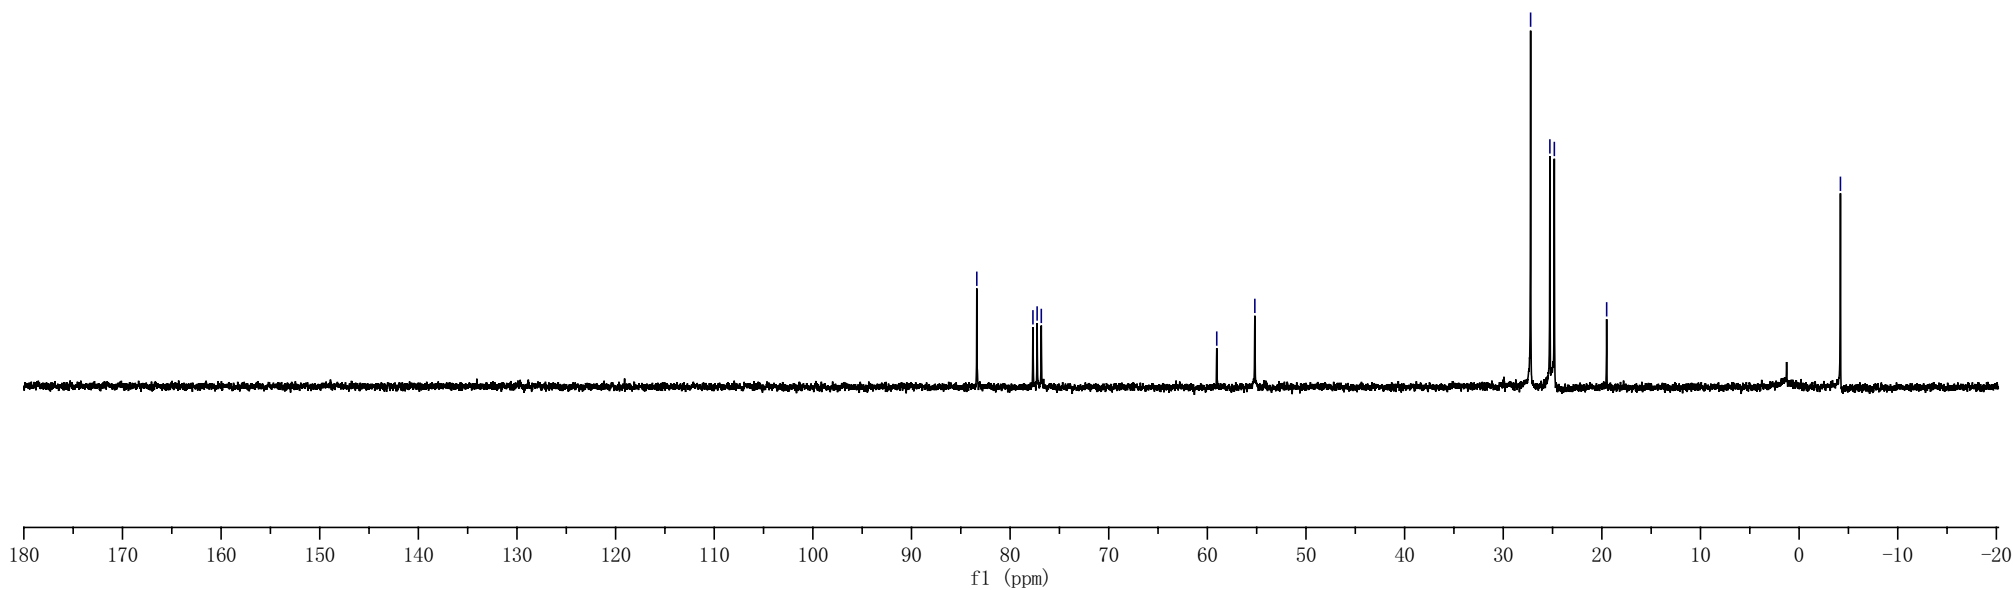

Supplementary Figure 124. <sup>13</sup>C NMR Spectrum of 7b.

crf-7-74-B-decoupling-CDC13

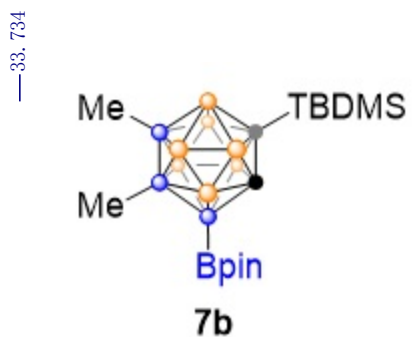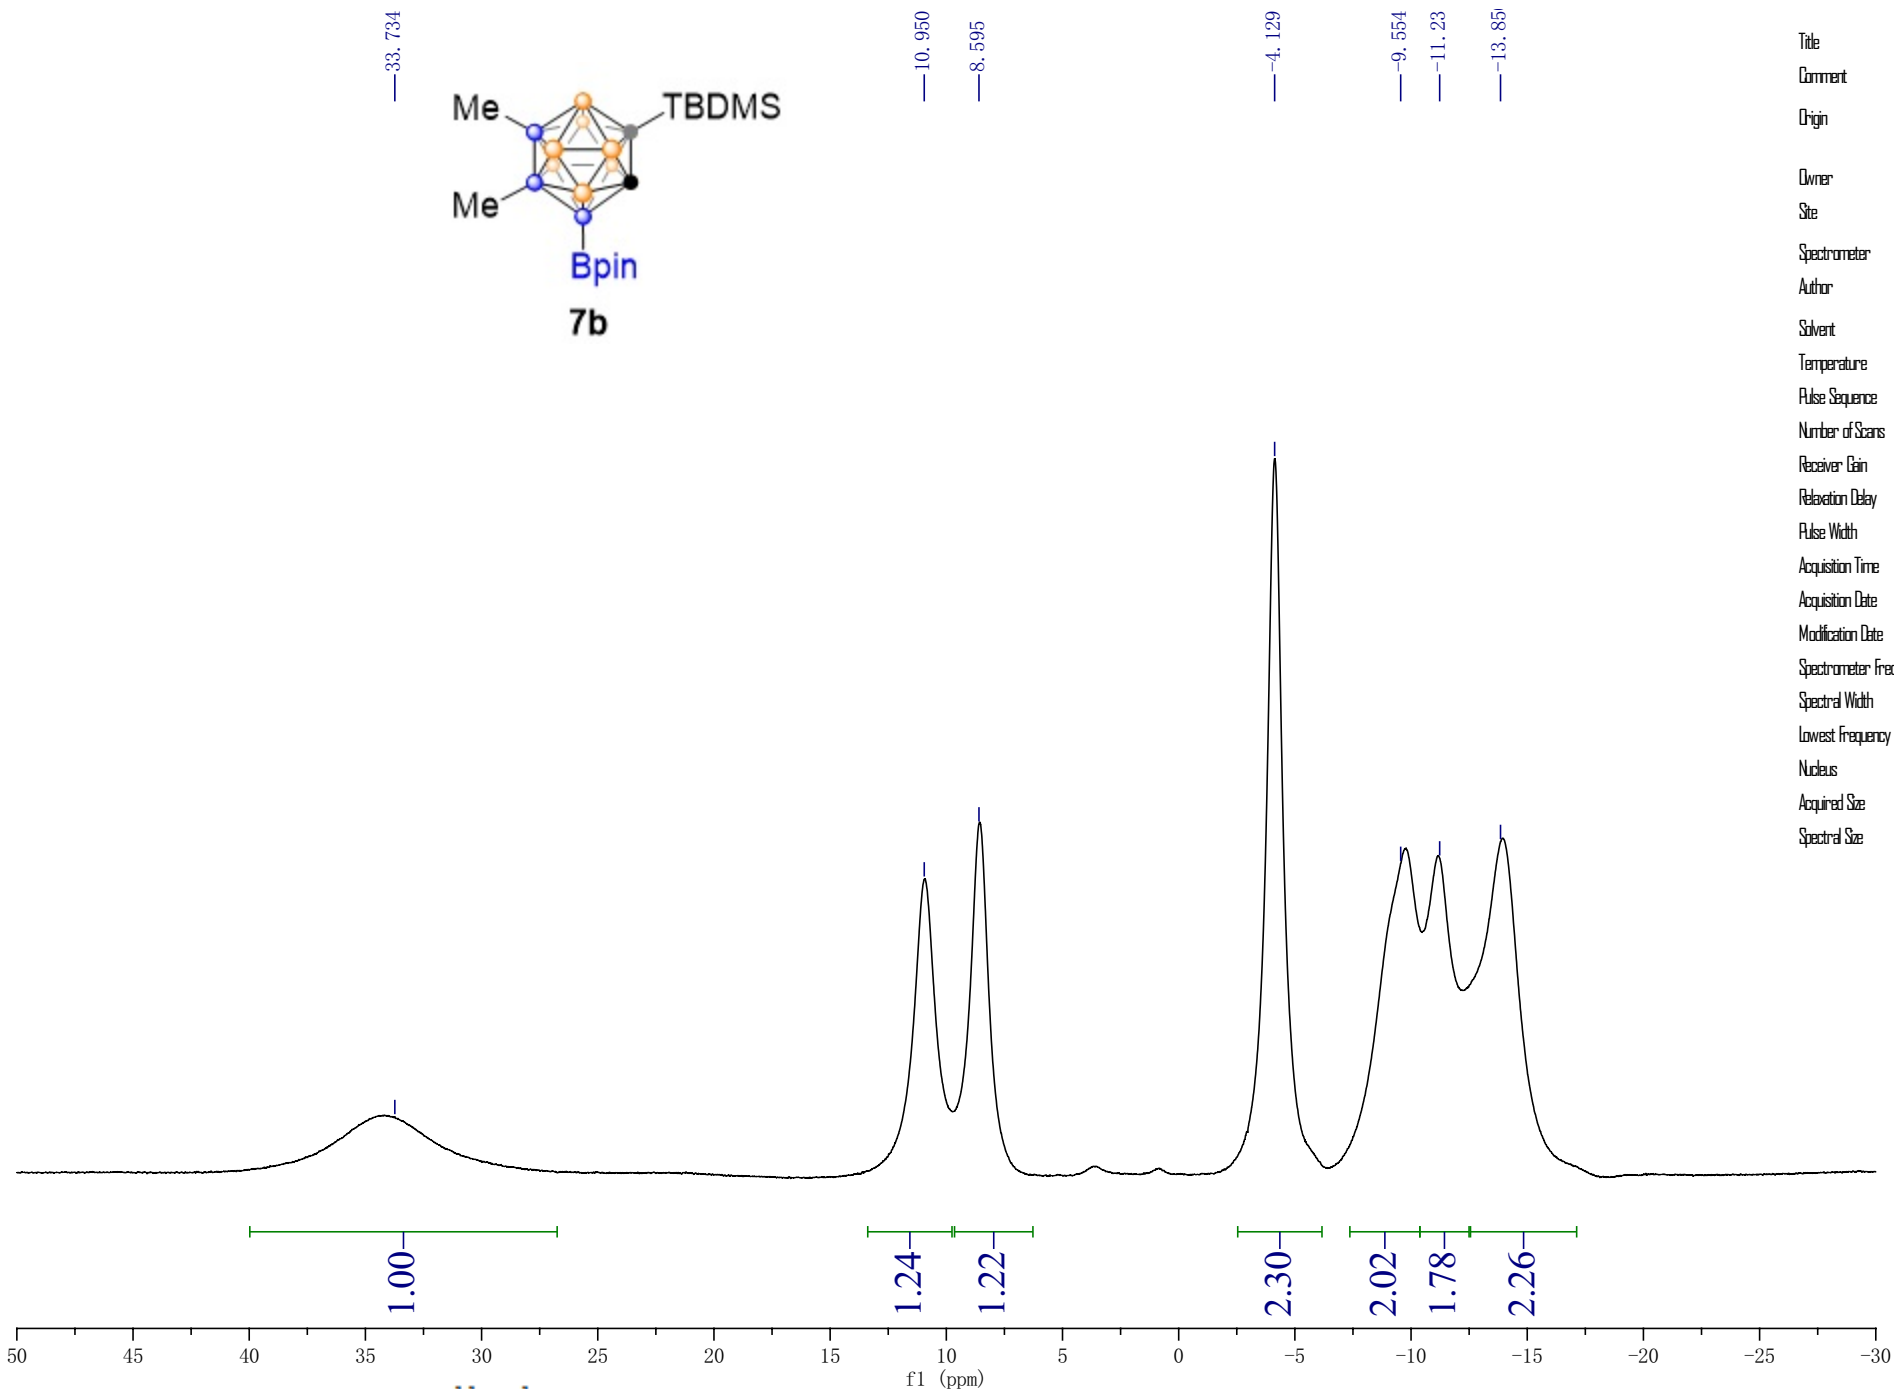

| Parameter              | Value                                      |
|------------------------|--------------------------------------------|
| Data File Name         | C:/Users/Administrator/Desktop/crf-7-74/td |
| Title                  | Desktop                                    |
| Comment                |                                            |
| Origin                 | UNMR Bruker Analytische Messtechnik GmbH   |
| Owner                  | root                                       |
| Site                   |                                            |
| Spectrometer           | dx400                                      |
| Author                 |                                            |
| Solvent                | DMSO                                       |
| Temperature            | 300.0                                      |
| Pulse Sequence         | aring1gy                                   |
| Number of Scans        | 116                                        |
| Receiver Gain          | 32                                         |
| Relaxation Delay       | 0.0000                                     |
| Pulse Width            | 13.4000                                    |
| Acquisition Time       | 0.512                                      |
| Acquisition Date       | 2015/23/18:37:35                           |
| Modification Date      | 2015/23/11:37:00                           |
| Spectrometer Frequency | 128.38                                     |
| Spectral Width         | 3261.3                                     |
| Lowest Frequency       | -16406.2                                   |
| Nucleus                | 11B                                        |
| Acquired Size          | 16384                                      |
| Spectral Size          | 3268                                       |

Supplementary Figure 125.  $^{11}\text{B}\{^1\text{H}\}$  NMR Spectrum of 7b.

crf-7-74-B-coupling-CDC13

33.807

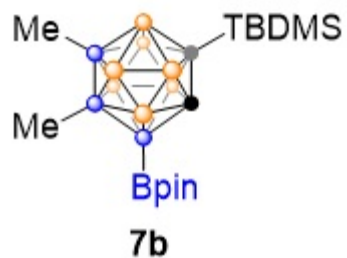

10.841

8.502

3.657

4.703

9.617

10.37

11.64

13.46

14.60

| Parameter              | Value                                                    |
|------------------------|----------------------------------------------------------|
| Data file Name         | C:/Users/Administrator/Desktop/b-crf774-coupling (1)/fid |
| Title                  | Desktop                                                  |
| Comment                |                                                          |
| Origin                 | UNMR, Bruker Analytische Messtechnik GmbH                |
| Owner                  | root                                                     |
| Site                   |                                                          |
| Spectrometer           | dmx400                                                   |
| Author                 |                                                          |
| Solvent                | DMSO                                                     |
| Temperature            | 300.0                                                    |
| Pulse Sequence         | aring.ty                                                 |
| Number of Scans        | 128                                                      |
| Receiver Gain          | 32                                                       |
| Relaxation Delay       | 0.0000                                                   |
| Pulse Width            | 13.4000                                                  |
| Acquisition Time       | 0.512                                                    |
| Acquisition Date       | 20151231 18:39:05                                        |
| Modification Date      | 20151231 11:39:00                                        |
| Spectrometer Frequency | 128.38                                                   |
| Spectral Width         | 3261.3                                                   |
| Lowest Frequency       | -18405.2                                                 |
| Nucleus                | 11B                                                      |
| Acquired Size          | 16384                                                    |
| Spectral Size          | 3268                                                     |

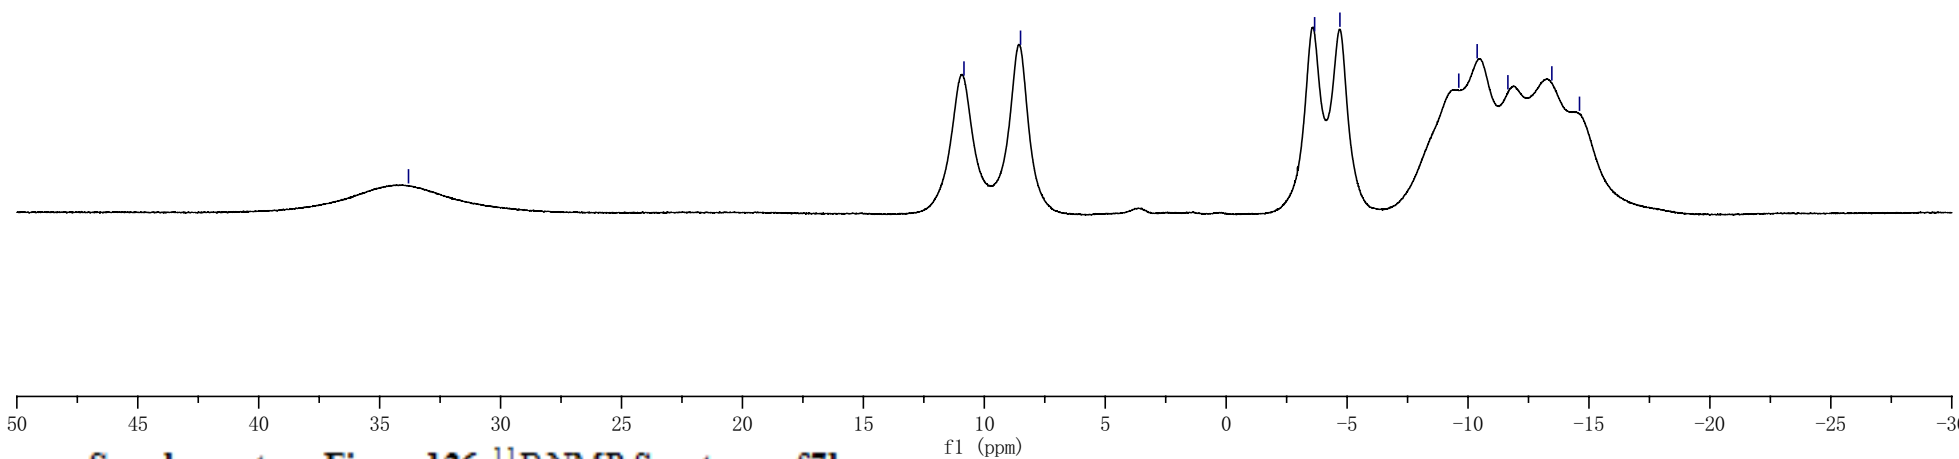

Supplementary Figure 126. <sup>11</sup>B NMR Spectrum of 7b.

crf-7-53-H-CDCl3

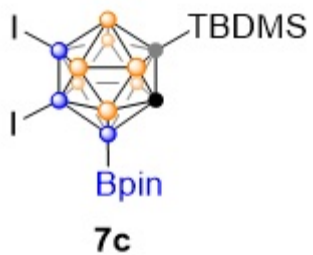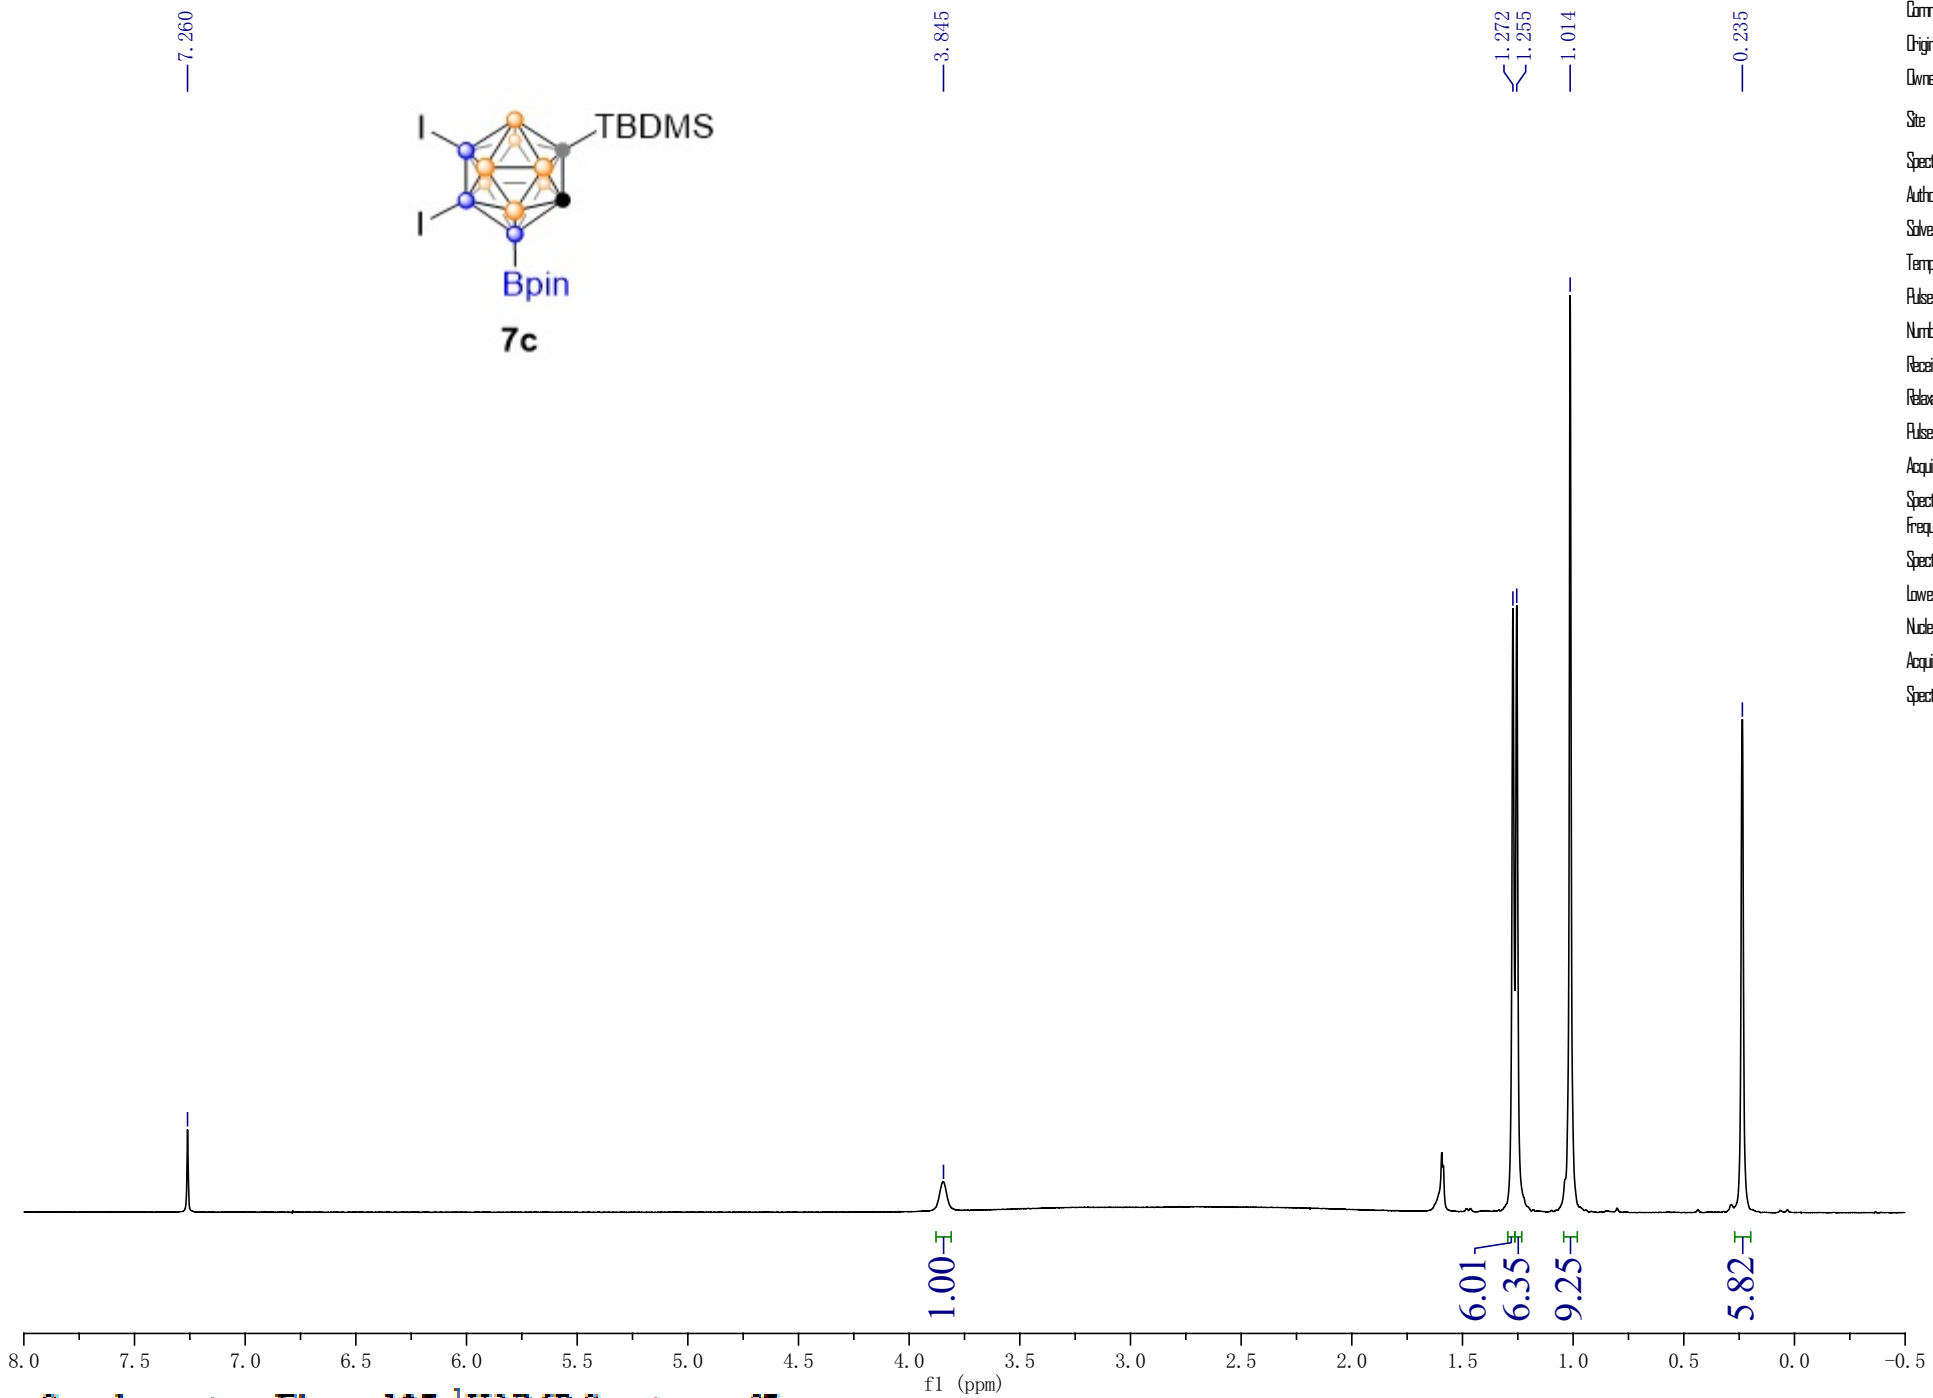

| Parameter              | Value               |
|------------------------|---------------------|
| Title                  | crf753-H-07         |
| Comment                | STANDARD 1H OBSERVE |
| Origin                 | Varian              |
| Owner                  |                     |
| Site                   |                     |
| Spectrometer           | mercury             |
| Author                 | omc                 |
| Solvent                | CDCl3               |
| Temperature            | 28.0                |
| Pulse Sequence         | zgpg30              |
| Number of Scans        | 8                   |
| Receiver Gain          | 32                  |
| Relaxation Delay       | 1.0000              |
| Pulse Width            | 0.0000              |
| Acquisition Date       | 2016-01-07 11:04:04 |
| Spectrometer Frequency | 300.03              |
| Spectral Width         | 5494.5              |
| Lowest Frequency       | -71.3               |
| Nucleus                | 1H                  |
| Acquired Size          | 10888               |
| Spectral Size          | 3288                |

Supplementary Figure 127. <sup>1</sup>H NMR Spectrum of 7c.

crf-7-53-C-CDC13

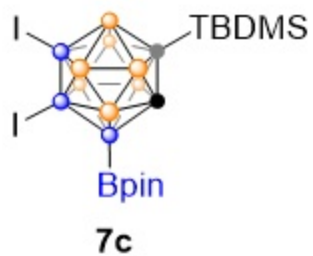

84.009

77.381

76.957

76.526

63.733

58.396

26.783

25.011

24.507

19.206

-4.575

| Parameter              | Value            |
|------------------------|------------------|
| Title                  | crf753C          |
| Comment                | 13C OBSERVE      |
| Origin                 | Varien           |
| Owner                  |                  |
| Site                   |                  |
| Spectrometer           | mercury          |
| Author                 | omc              |
| Solvent                | CDCl3            |
| Temperature            | 21.0             |
| Pulse Sequence         | zgpg30           |
| Number of Scans        | 164              |
| Receiver Gain          | 38               |
| Relaxation Delay       | 1.0000           |
| Pulse Width            | 0.0000           |
| Acquisition Date       | 2016-07-11: 2:53 |
| Spectrometer Frequency | 75.45            |
| Spectral Width         | 2049.8           |
| Lowest Frequency       | -285.2           |
| Nucleus                | 13C              |
| Acquired Size          | 30736            |
| Spectral Size          | 65536            |

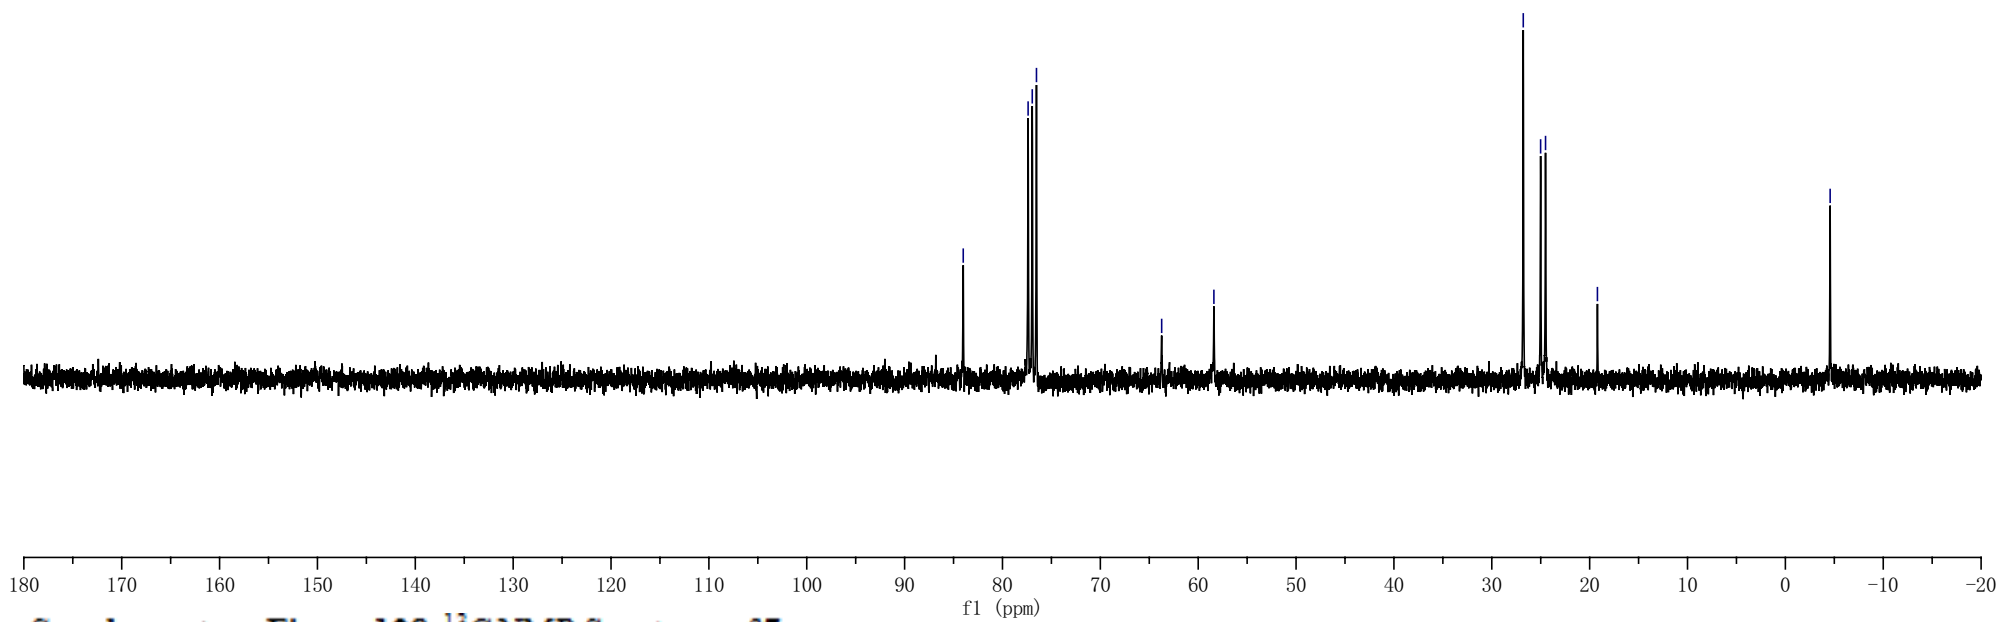

Supplementary Figure 128. <sup>13</sup>C NMR Spectrum of 7c.

crf-7-53-B-decoupling-CDC13

33.421

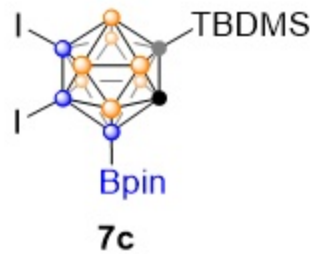

-2.848

-9.069

-10.483

-11.554

-12.865

| Parameter              | Value                                                                 |
|------------------------|-----------------------------------------------------------------------|
| Data File Name         | C:/Users/Administrator/Desktop/work/送样NMR/boradation/753/b-crf753/fid |
| Title                  | 753                                                                   |
| Comment                |                                                                       |
| Origin                 | UNMR Bruker Analytische Messtechnik GmbH                              |
| Owner                  | root                                                                  |
| Site                   |                                                                       |
| Spectrometer           | dx400                                                                 |
| Author                 |                                                                       |
| Solvent                | DMSO                                                                  |
| Temperature            | 300.0                                                                 |
| Pulse Sequence         | aring_tgy                                                             |
| Number of Scans        | 26                                                                    |
| Receiver Gain          | 32                                                                    |
| Relaxation Delay       | 0.0000                                                                |
| Pulse Width            | 13.4000                                                               |
| Acquisition Time       | 0.395                                                                 |
| Acquisition Date       | 2016-07-19 18:29                                                      |
| Modification Date      | 2016-07-21 18:00                                                      |
| Spectrometer Frequency | 128.38                                                                |
| Spectral Width         | 51821                                                                 |
| Lowest Frequency       | -2006.0                                                               |
| Nucleus                | 11B                                                                   |
| Acquired Size          | 16384                                                                 |
| Spectral Size          | 3068                                                                  |

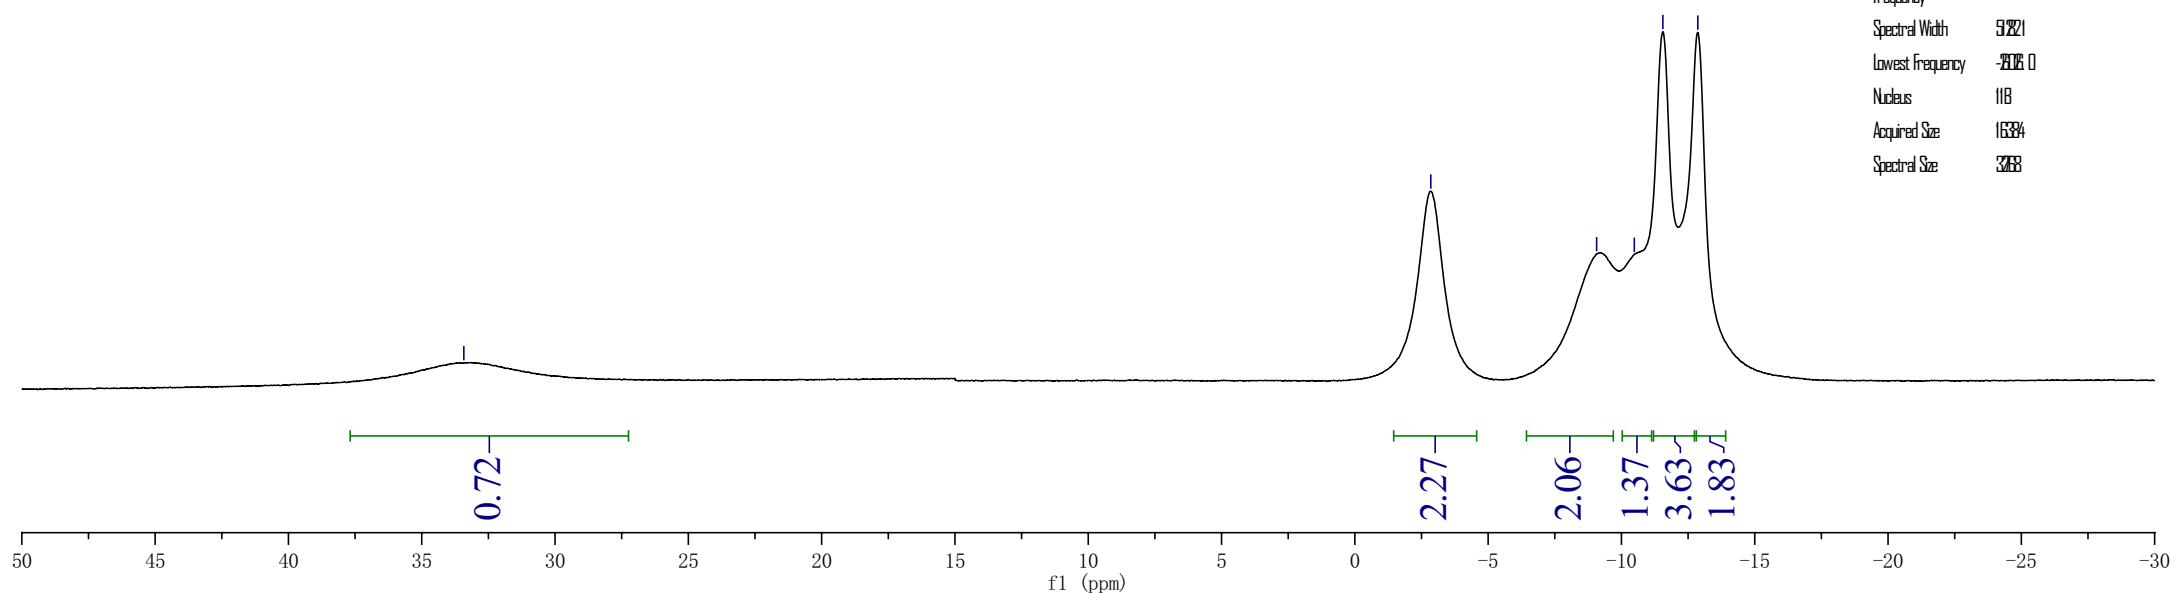

Supplementary Figure 129.  $^{11}\text{B}\{^1\text{H}\}$  NMR Spectrum of 7c.

S150

crf-7-53-B-coupling-CDC13

—32.986

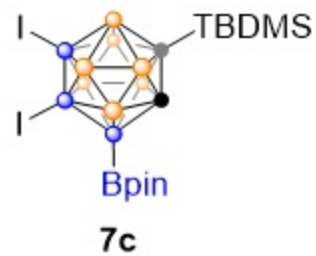

—-2.226  
—-3.501

—-10.074  
—-11.569  
—-12.880

| Parameter              | Value                                                                            |
|------------------------|----------------------------------------------------------------------------------|
| Data file Name         | C:/Users/Administrator/Desktop/work/送<br>样NMR/borolation/753/b-cr753-coupling/td |
| Title                  | 753                                                                              |
| Comment                |                                                                                  |
| Origin                 | UNMR Bruker Analytische Messtechnik GmbH                                         |
| Owner                  | root                                                                             |
| Site                   |                                                                                  |
| Spectrometer           | dr400                                                                            |
| Author                 |                                                                                  |
| Solvent                | DMSO                                                                             |
| Temperature            | 300.0                                                                            |
| Pulse Sequence         | aring_1gy                                                                        |
| Number of Scans        | 512                                                                              |
| Receiver Gain          | 32                                                                               |
| Relaxation Delay       | 0.0000                                                                           |
| Pulse Width            | 13.4000                                                                          |
| Acquisition Time       | 0.395                                                                            |
| Acquisition Date       | 2016-01-07 19:37:59                                                              |
| Modification Date      | 2016-01-07 12:37:00                                                              |
| Spectrometer Frequency | 128.38                                                                           |
| Spectral Width         | 51.821                                                                           |
| Lowest Frequency       | -2677.1                                                                          |
| Nucleus                | 11B                                                                              |
| Acquired Size          | 16384                                                                            |
| Spectral Size          | 3268                                                                             |

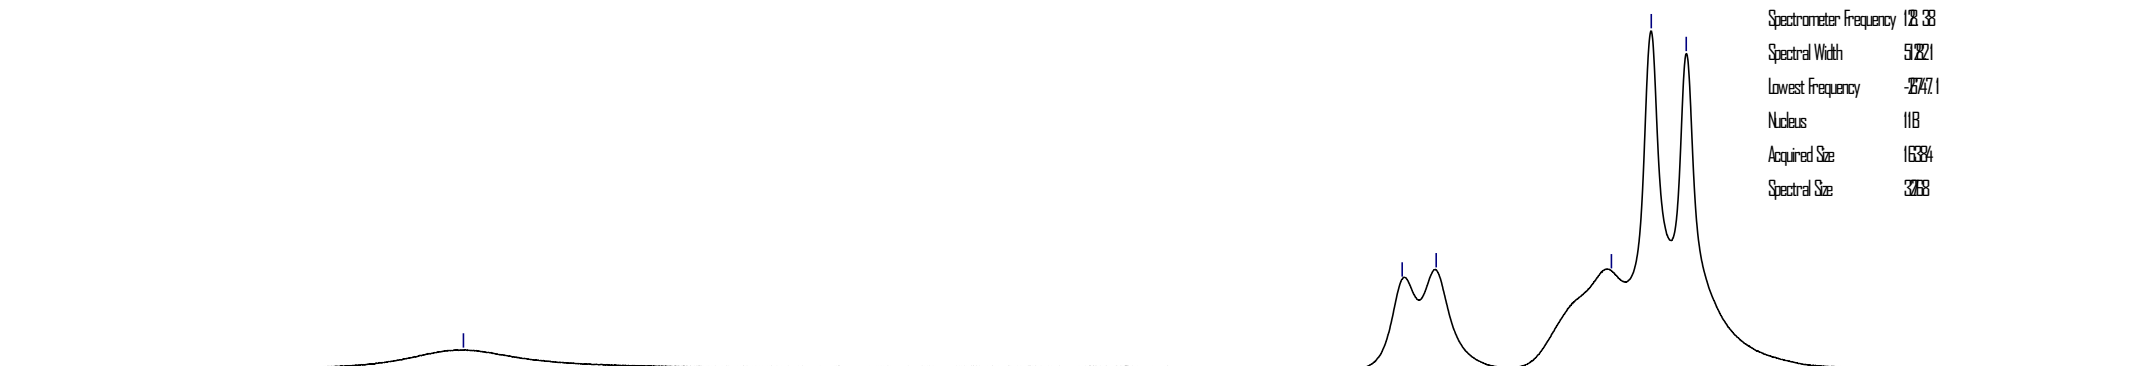

45 40 35 30 25 20 15 10 5 0 -5 -10 -15 -20 -25 -30

Supplementary Figure 130. <sup>11</sup>B NMR Spectrum of 7c.

f1 (ppm)  
S151

crf-7-38-H-CDCl3

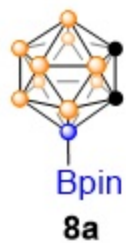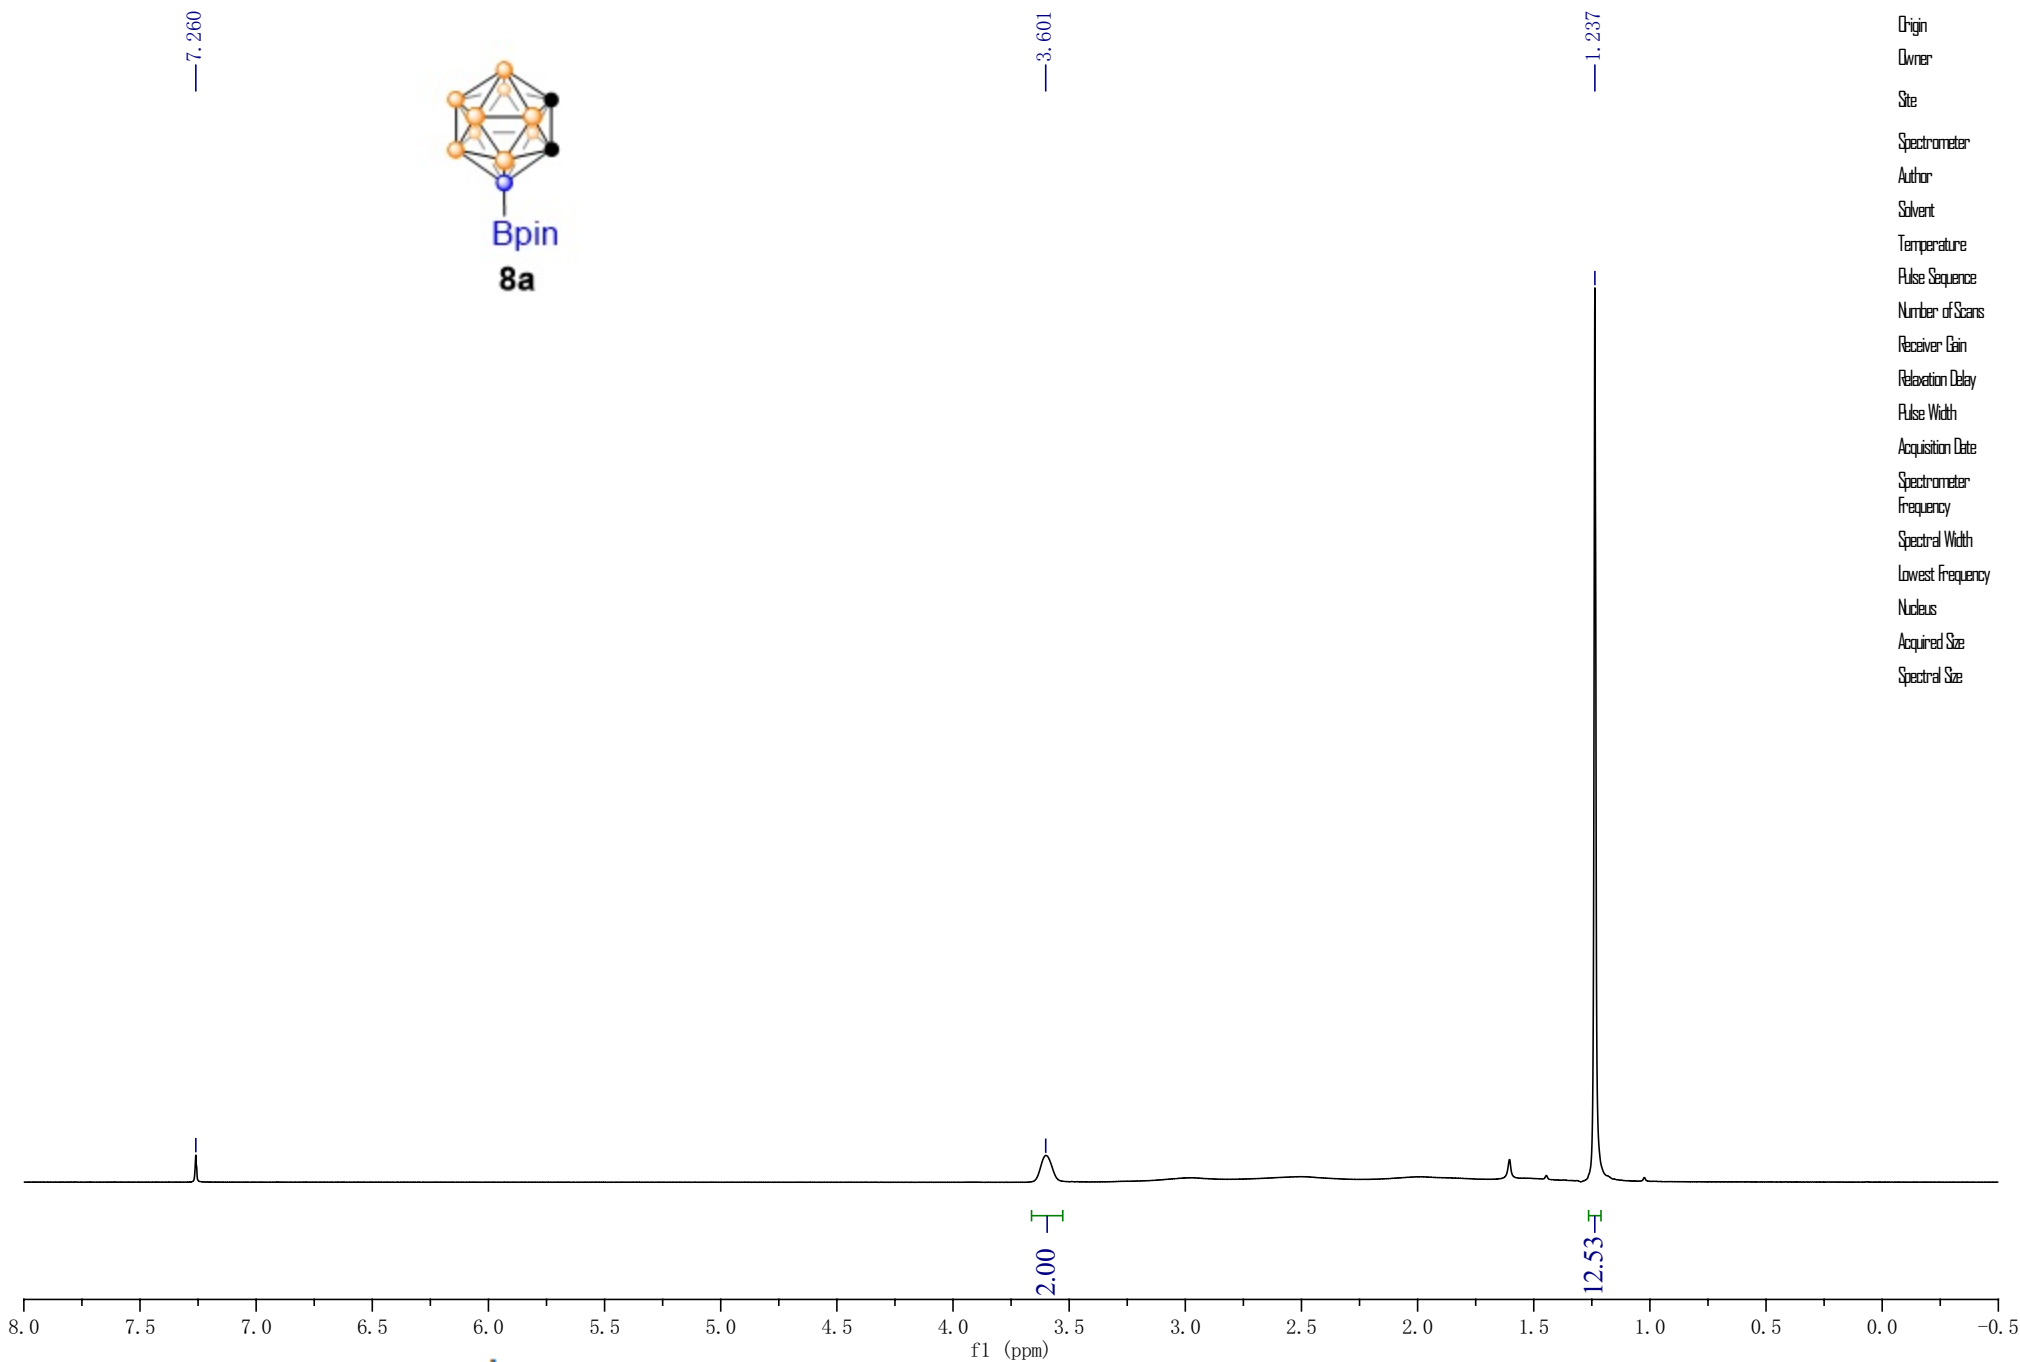

| Parameter              | Value            |
|------------------------|------------------|
| Title                  | crf-7-38-124     |
| Comment                | STANDARD OBSERVE |
| Origin                 | Varian           |
| Owner                  |                  |
| Site                   |                  |
| Spectrometer           | mercury          |
| Author                 | omc              |
| Solvent                | CDCl3            |
| Temperature            | 29.0             |
| Pulse Sequence         | zgpg30           |
| Number of Scans        | 16               |
| Receiver Gain          | 30               |
| Relaxation Delay       | 1.0000           |
| Pulse Width            | 0.0000           |
| Acquisition Date       | 2015/24/11:13:56 |
| Spectrometer Frequency | 300.03           |
| Spectral Width         | 5494.5           |
| Lowest Frequency       | -70.5            |
| Nucleus                | 1H               |
| Acquired Size          | 10888            |
| Spectral Size          | 3268             |

Supplementary Figure 131. <sup>1</sup>H NMR Spectrum of 8a.



crf-7-38-C-CDCl3

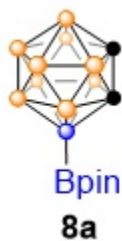

83.846  
77.694  
77.270  
76.847

56.162  
56.025

25.024

| Parameter              | Value            |
|------------------------|------------------|
| Title                  | crf738C124       |
| Comment                | 13C OBSERVE      |
| Origin                 | Varian           |
| Owner                  |                  |
| Site                   |                  |
| Spectrometer           | mercury          |
| Author                 | omc              |
| Solvent                | CDCl3            |
| Temperature            | 21.0             |
| Pulse Sequence         | sfpul            |
| Number of Scans        | 120              |
| Receiver Gain          | 34               |
| Relaxation Delay       | 1.0000           |
| Pulse Width            | 0.0000           |
| Acquisition Date       | 2015124T11:17:17 |
| Spectrometer Frequency | 75.45            |
| Spectral Width         | 2743.8           |
| Lowest Frequency       | -215.2           |
| Nucleus                | 13C              |
| Acquired Size          | 31738            |
| Spectral Size          | 65536            |

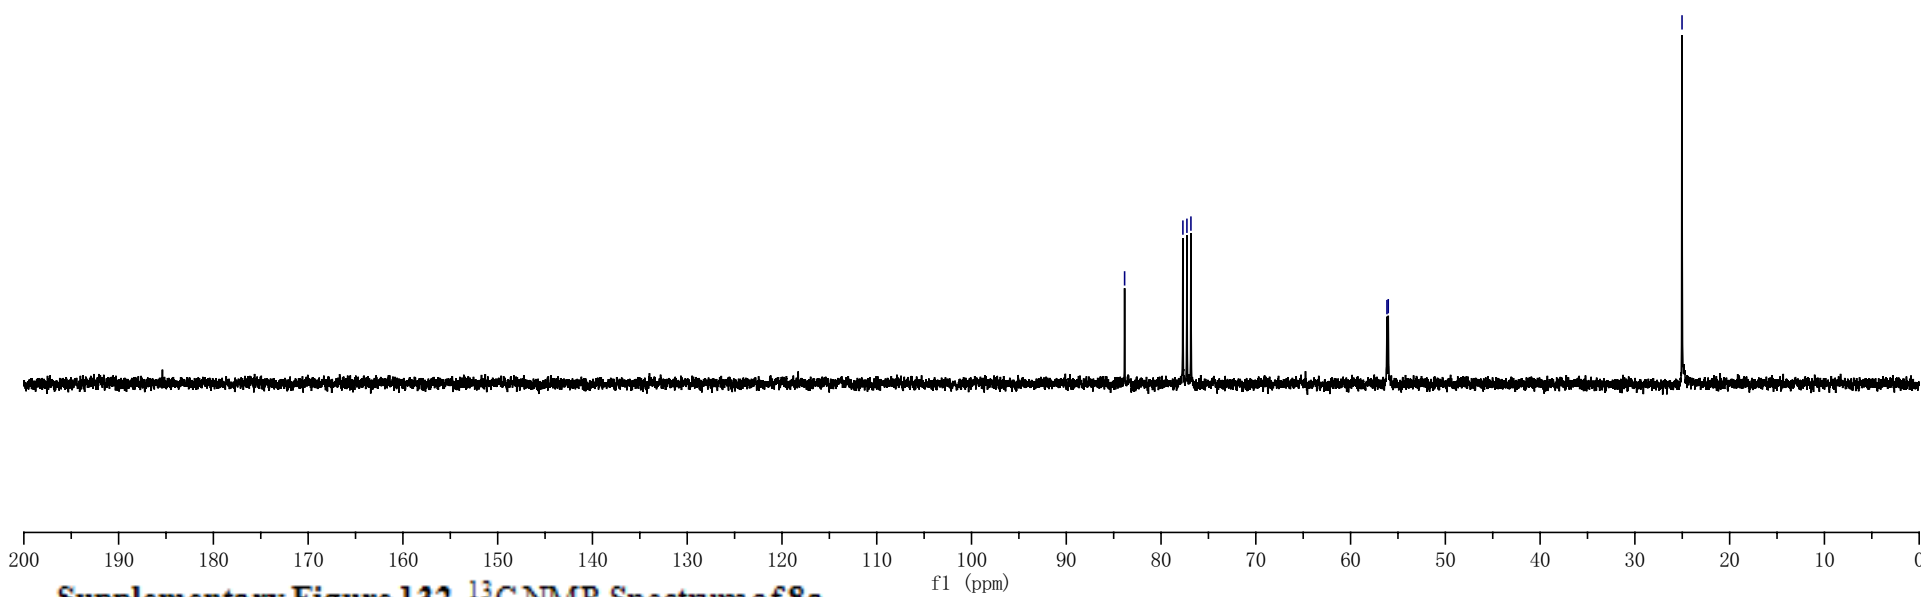

Supplementary Figure 132. <sup>13</sup>C NMR Spectrum of 8a.

crf-7-38-B-decoupling-CDC13

33.879

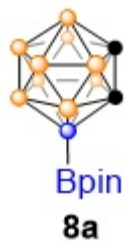

-1.484

-8.051

-11.739

-12.539

-13.898

| Parameter              | Value                                                    |
|------------------------|----------------------------------------------------------|
| Data File Name         | C:/Users/Administrator/Desktop/work/送样NMR/b-crif-7-38/1d |
| Title                  | 送样NMR                                                    |
| Comment                |                                                          |
| Origin                 | LWMR Bruker Analytische Messtechnik GmbH                 |
| Owner                  | root                                                     |
| Site                   |                                                          |
| Spectrometer           | dx400                                                    |
| Author                 |                                                          |
| Solvent                | DMSO                                                     |
| Temperature            | 300.0                                                    |
| Pulse Sequence         | aring.1gy                                                |
| Number of Scans        | 26                                                       |
| Receiver Gain          | 32                                                       |
| Relaxation Delay       | 0.0000                                                   |
| Pulse Width            | 13.4000                                                  |
| Acquisition Time       | 0.512                                                    |
| Acquisition Date       | 2015/2/11/16:08:17                                       |
| Modification Date      | 2015/2/11/16:08:00                                       |
| Spectrometer Frequency | 128.38                                                   |
| Spectral Width         | 3761.3                                                   |
| Lowest Frequency       | -16668.9                                                 |
| Nucleus                | 11B                                                      |
| Acquired Size          | 16394                                                    |
| Spectral Size          | 3268                                                     |

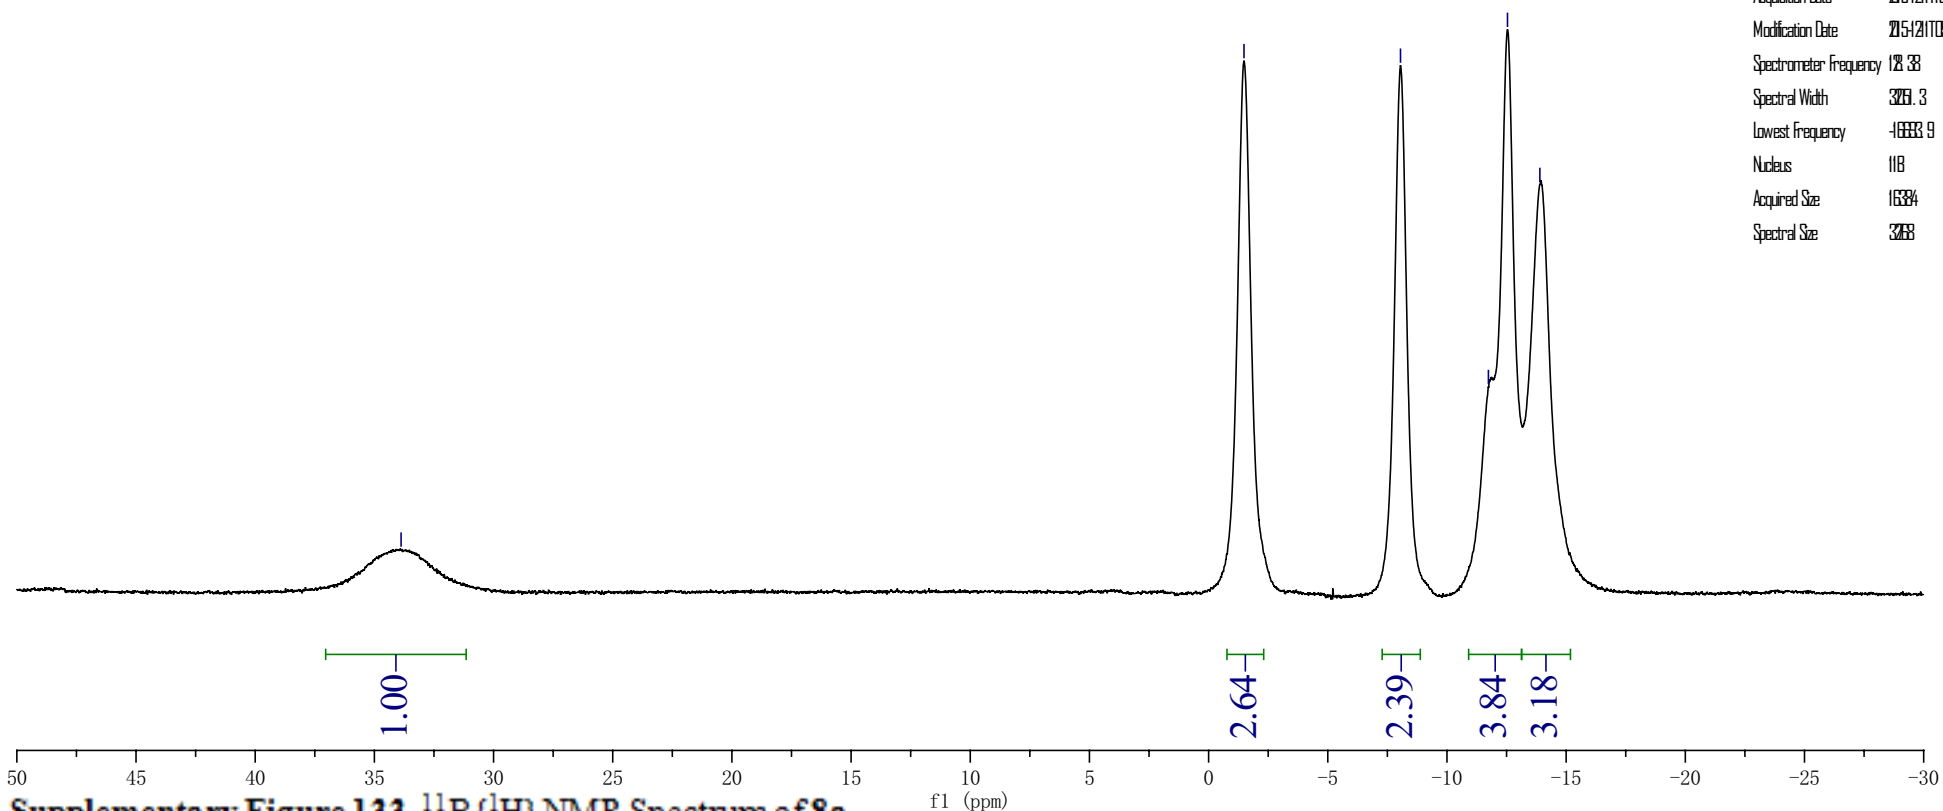

Supplementary Figure 133.  $^{11}\text{B}\{^1\text{H}\}$  NMR Spectrum of **8a**.

crf-7-38-B-coupling-CDC13

— 34.019



— -0.830

— -2.143

— -7.560

— -8.617

— -12.001

— -13.244

— -14.666

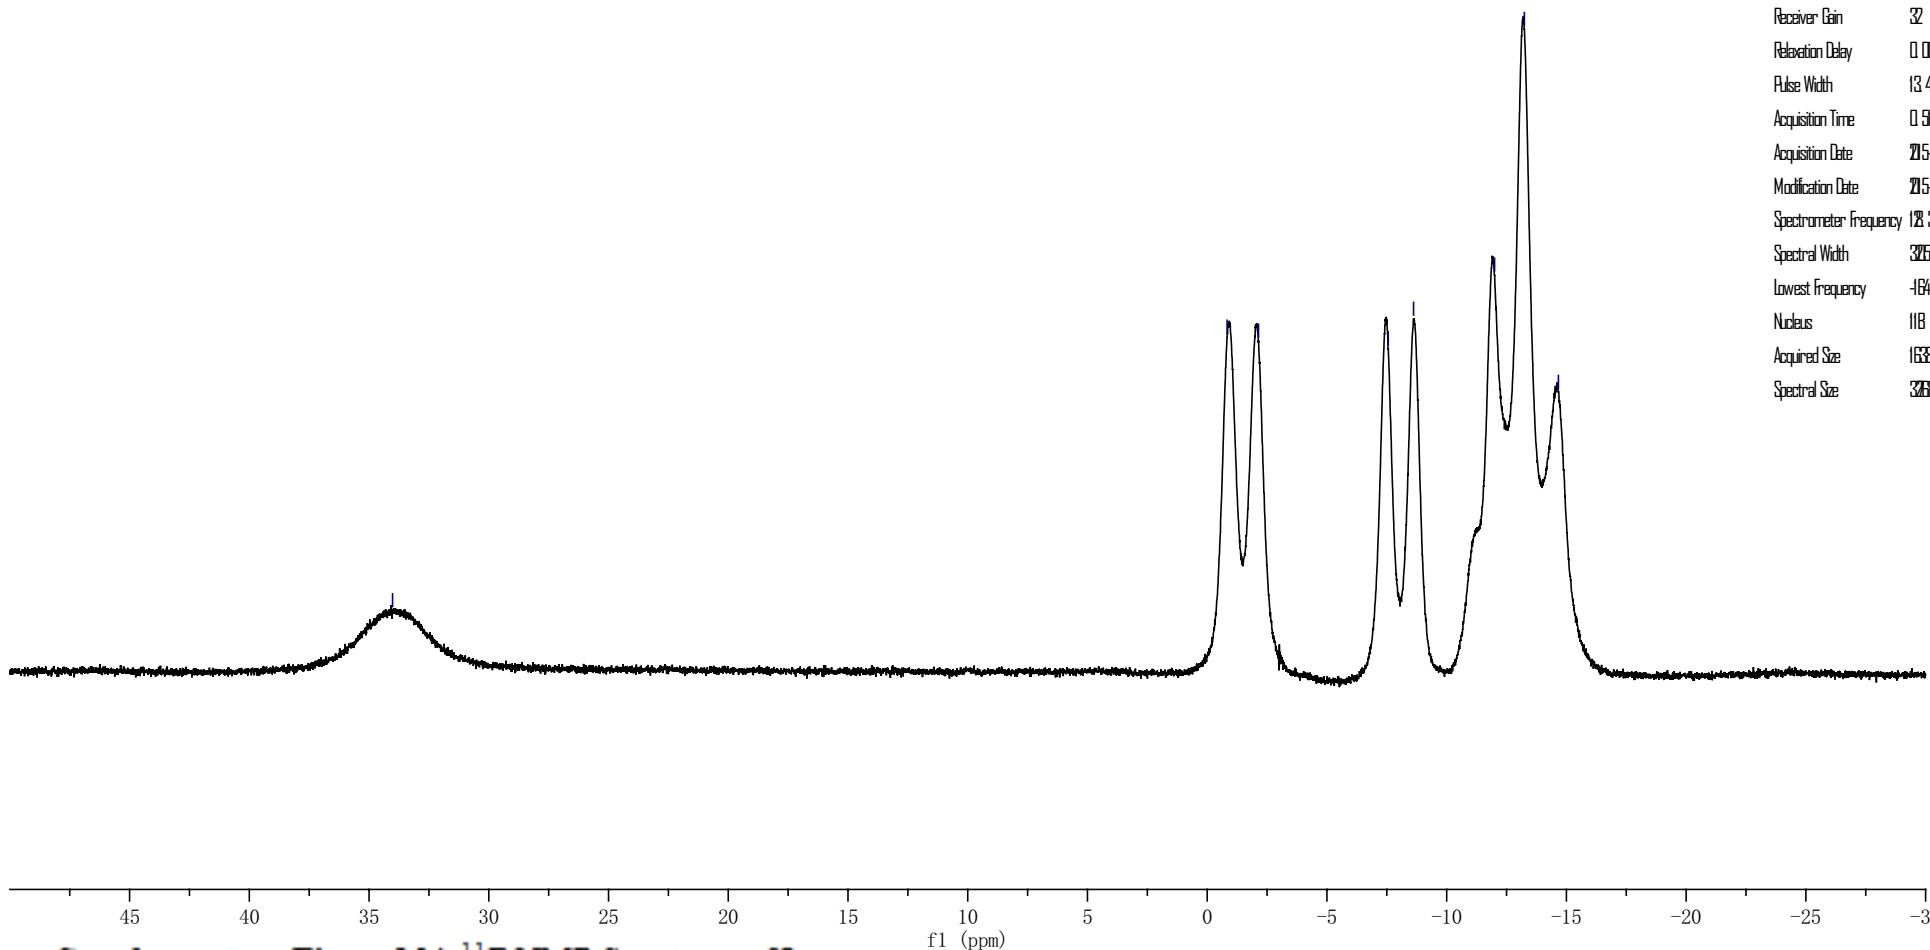

| Parameter              | Value                                                                 |
|------------------------|-----------------------------------------------------------------------|
| Data File Name         | G:/Users/Administrator/Desktop/work/送样NMR/b-crf-7-38-coupling (1)/fid |
| Title                  | 送样NMR                                                                 |
| Comment                |                                                                       |
| Origin                 | UNMR Bruker Analytische Messtechnik GmbH                              |
| Owner                  | root                                                                  |
| Site                   |                                                                       |
| Spectrometer           | dr400                                                                 |
| Author                 |                                                                       |
| Solvent                | CDCl3                                                                 |
| Temperature            | 300.0                                                                 |
| Pulse Sequence         | zing1gy                                                               |
| Number of Scans        | 26                                                                    |
| Receiver Gain          | 32                                                                    |
| Relaxation Delay       | 0.000                                                                 |
| Pulse Width            | 13.400                                                                |
| Acquisition Time       | 0.912                                                                 |
| Acquisition Date       | 2015/2/11 16:10:49                                                    |
| Modification Date      | 2015/2/11 16:10:00                                                    |
| Spectrometer Frequency | 128.38                                                                |
| Spectral Width         | 3261.3                                                                |
| Lowest Frequency       | -16411.0                                                              |
| Nucleus                | 11B                                                                   |
| Acquired Size          | 16384                                                                 |
| Spectral Size          | 3268                                                                  |

Supplementary Figure 134. <sup>11</sup>B NMR Spectrum of 8a.

crf-7-82-H-CDCl3

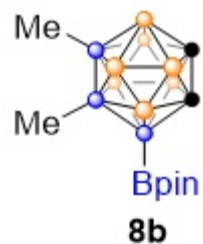

| Parameter              | Value               |
|------------------------|---------------------|
| Title                  | crf782H             |
| Comment                | STANDARD 1H OBSERVE |
| Origin                 | Varian              |
| Owner                  |                     |
| Site                   |                     |
| Spectrometer           | mercury             |
| Author                 | onc                 |
| Solvent                | CDCl3               |
| Temperature            | 21.0                |
| Pulse Sequence         | sgul                |
| Number of Scans        | 2                   |
| Receiver Gain          | 28                  |
| Relaxation Delay       | 1.0000              |
| Pulse Width            | 0.0000              |
| Acquisition Date       | 2016-01-15 02:06    |
| Spectrometer Frequency | 300.03              |
| Spectral Width         | 5494.5              |
| Lowest Frequency       | -70.5               |
| Nucleus                | 1H                  |
| Acquired Size          | 10000               |
| Spectral Size          | 3288                |

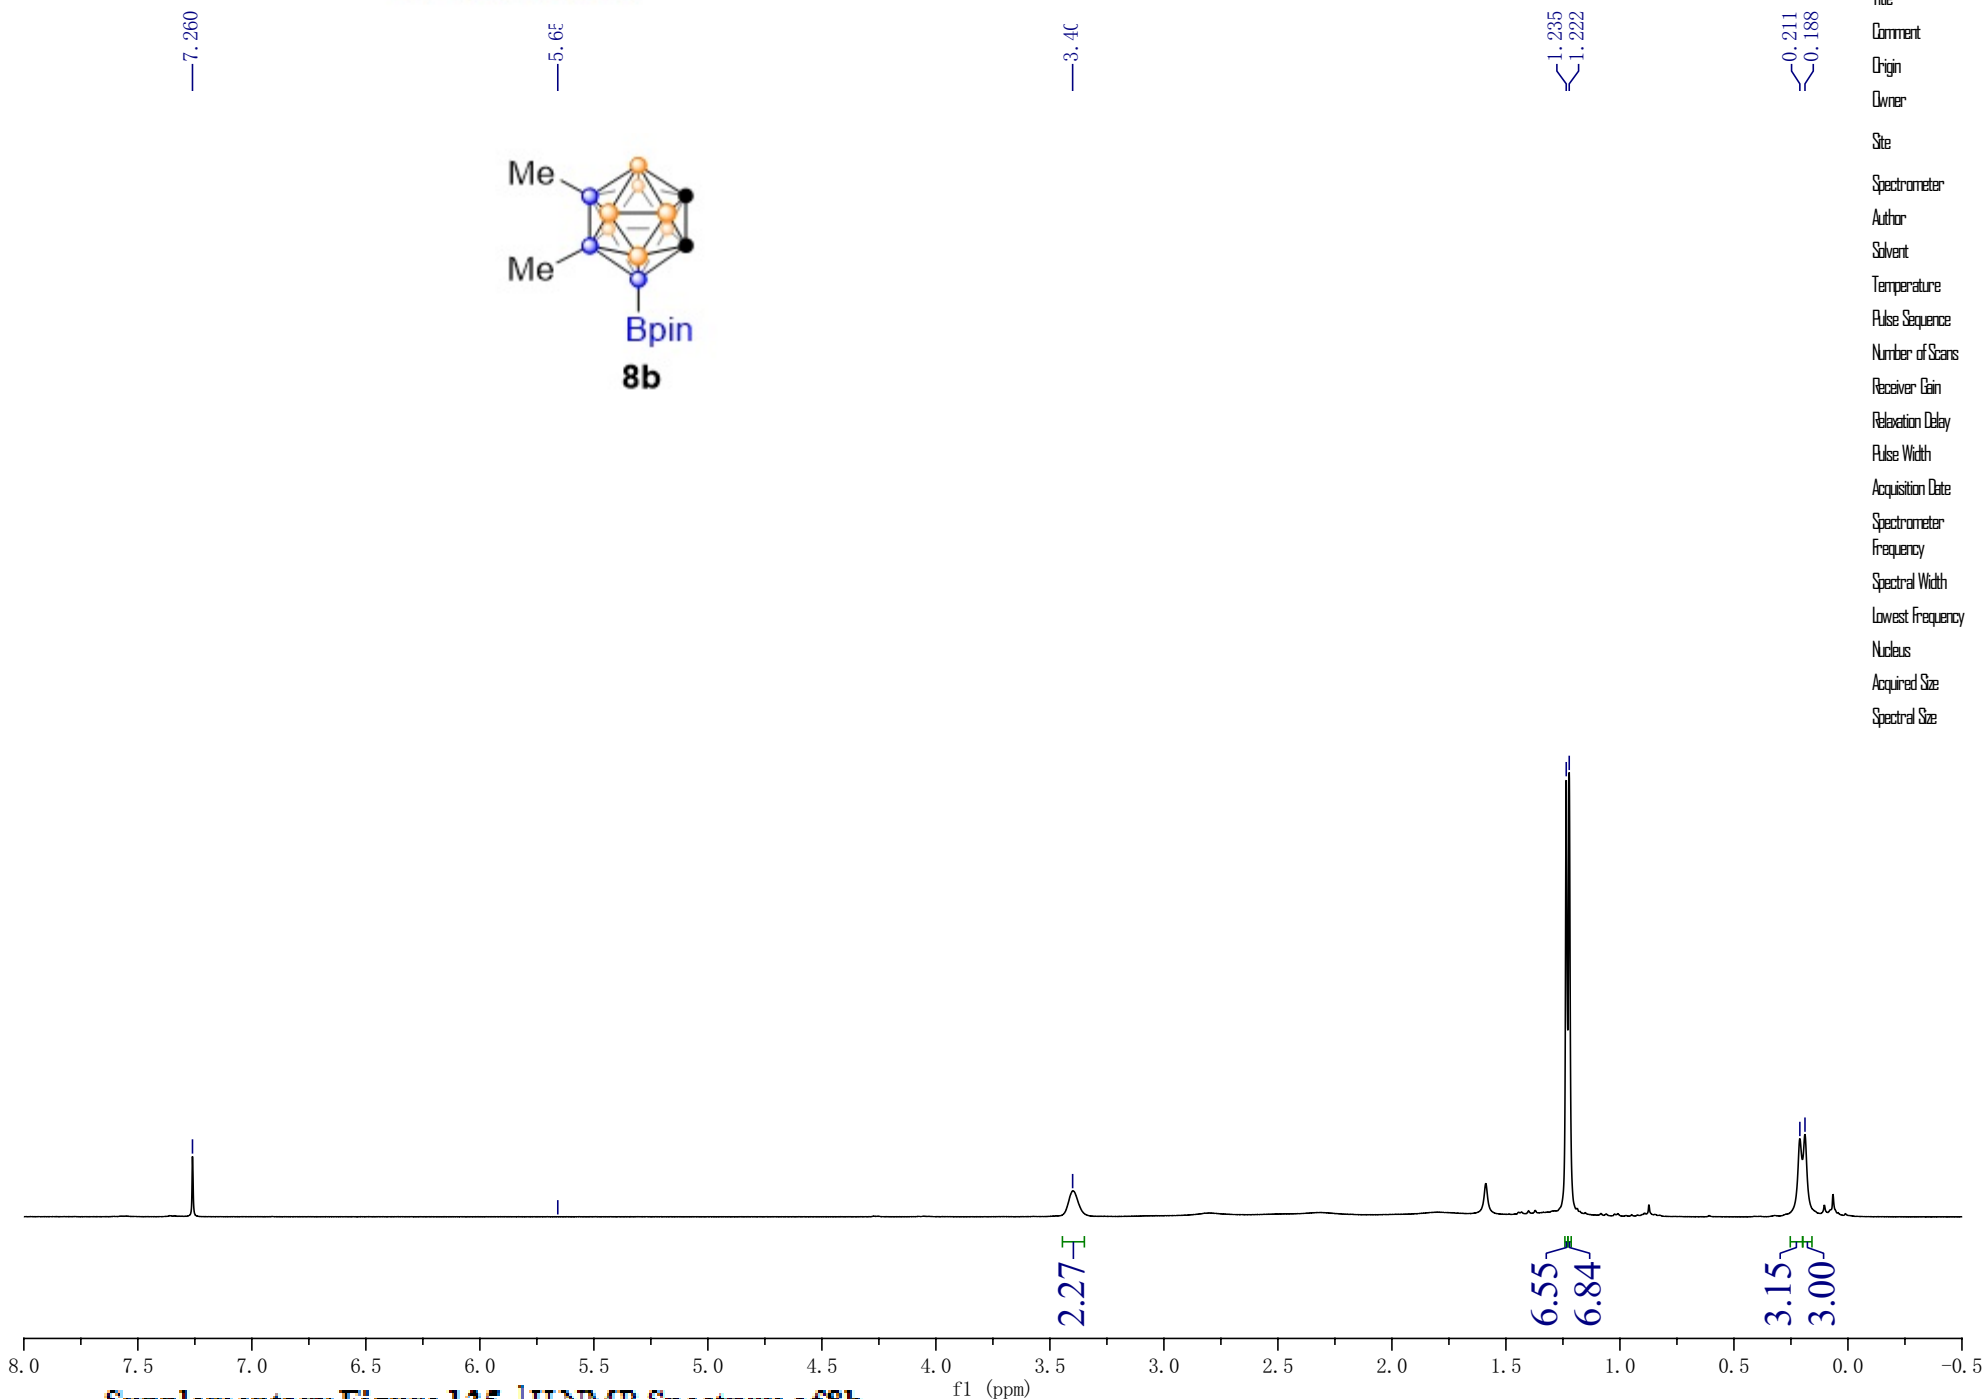

Supplementary Figure 135. <sup>1</sup>H NMR Spectrum of 8b.

crf-7-82-C-CDCl3

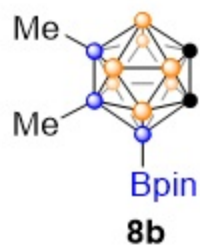

83.523  
77.682  
77.258  
76.835

49.314  
49.143

25.229  
24.878

| Parameter              | Value               |
|------------------------|---------------------|
| Title                  | crf-782C            |
| Comment                | 13C OBSERVE         |
| Origin                 | Varian              |
| Owner                  |                     |
| Site                   |                     |
| Spectrometer           | mercury             |
| Author                 | omc                 |
| Solvent                | CDCl3               |
| Temperature            | 29.0                |
| Pulse Sequence         | sZul                |
| Number of Scans        | 168                 |
| Receiver Gain          | 38                  |
| Relaxation Delay       | 1.0000              |
| Pulse Width            | 0.0000              |
| Acquisition Date       | 2016-01-07 15:09:14 |
| Spectrometer Frequency | 75.45               |
| Spectral Width         | 2049.8              |
| Lowest Frequency       | -215.2              |
| Nucleus                | 13C                 |
| Acquired Size          | 30738               |
| Spectral Size          | 65536               |

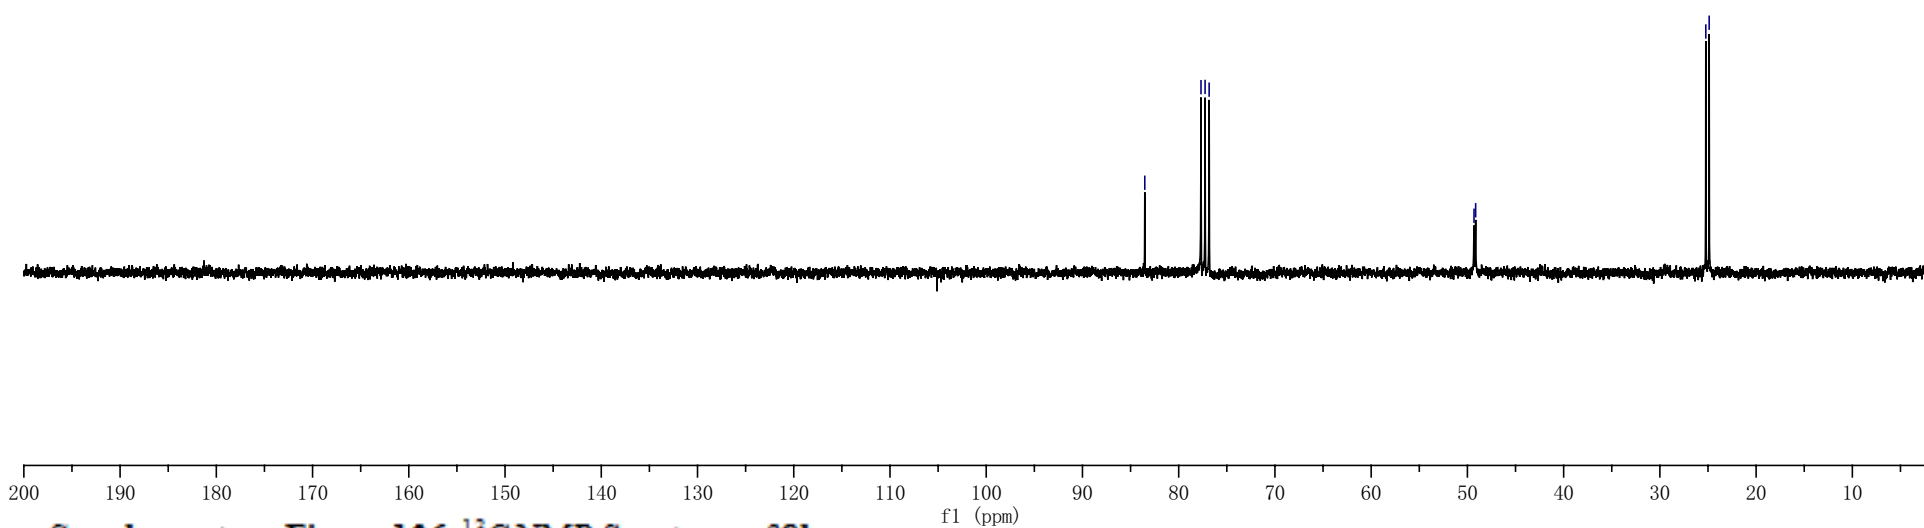

Supplementary Figure 136. <sup>13</sup>C NMR Spectrum of 8b.

crf-7-82-B-decoupling-CDC13

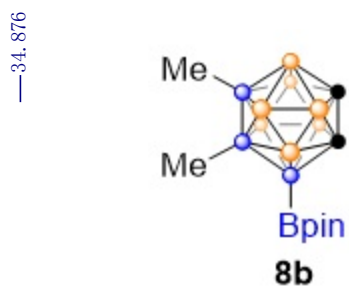

34.876

9.598

-5.017

-11.496

-14.335

| Parameter              | Value                                      |
|------------------------|--------------------------------------------|
| Data File Name         | C:/Users/Administrator/Desktop/b-cr7-82-1d |
| Title                  | Desktop                                    |
| Comment                |                                            |
| Origin                 | UNMR Bruker Analytische Messtechnik GmbH   |
| Owner                  | root                                       |
| Site                   |                                            |
| Spectrometer           | dx400                                      |
| Author                 |                                            |
| Solvent                | DMSO                                       |
| Temperature            | 300.0                                      |
| Pulse Sequence         | aring_1gy                                  |
| Number of Scans        | 512                                        |
| Receiver Gain          | 32                                         |
| Relaxation Delay       | 0.0000                                     |
| Pulse Width            | 13.4000                                    |
| Acquisition Time       | 0.512                                      |
| Acquisition Date       | 2016-01-07 15:24:45                        |
| Modification Date      | 2016-01-07 15:28:00                        |
| Spectrometer Frequency | 128.38                                     |
| Spectral Width         | 3261.3                                     |
| Lowest Frequency       | -16282.3                                   |
| Nucleus                | <sup>11</sup> B                            |
| Acquired Size          | 16394                                      |
| Spectral Size          | 3268                                       |

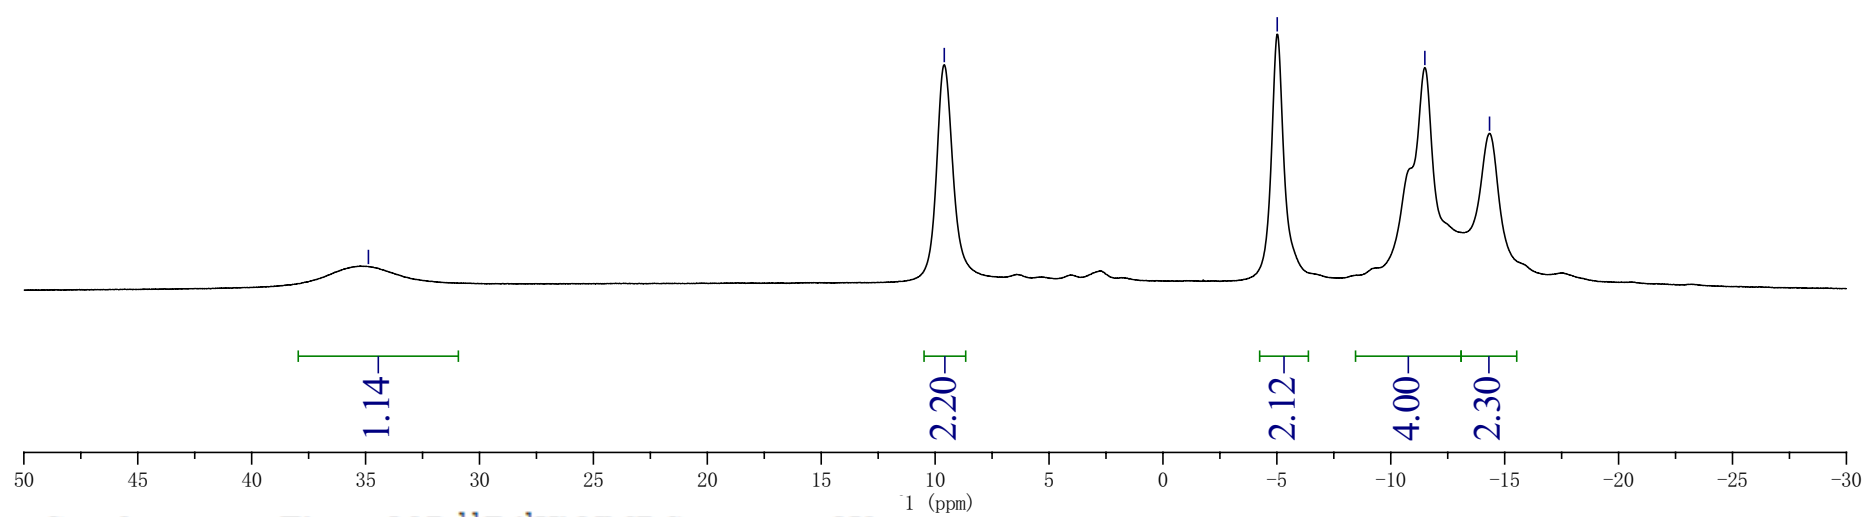

Supplementary Figure 137. <sup>11</sup>B{<sup>1</sup>H} NMR Spectrum of **8b**.

crf-7-82-B-coupling-CDC13

35.119

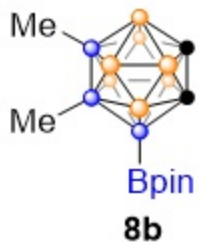

-4.460

-5.596

-10.910

-12.132

-13.706

-15.023

| Parameter              | Value                                             |
|------------------------|---------------------------------------------------|
| Data File Name         | C:/Users/Administrator/Desktop/b-cr782coupling/td |
| Title                  | Desktop                                           |
| Comment                |                                                   |
| Origin                 | UNMR Bruker Analytische Messtechnik GmbH          |
| Owner                  | root                                              |
| Site                   |                                                   |
| Spectrometer           | chr400                                            |
| Author                 |                                                   |
| Solvent                | DMSO                                              |
| Temperature            | 300.0                                             |
| Pulse Sequence         | aring1gy                                          |
| Number of Scans        | 512                                               |
| Receiver Gain          | 32                                                |
| Relaxation Delay       | 0.0000                                            |
| Pulse Width            | 13.4000                                           |
| Acquisition Time       | 0.512                                             |
| Acquisition Date       | 2016-01-04T15:31:18                               |
| Modification Date      | 2016-01-04T18:32:00                               |
| Spectrometer Frequency | 128.38                                            |
| Spectral Width         | 326.3                                             |
| Lowest Frequency       | -16323                                            |
| Nucleus                | 11B                                               |
| Acquired Size          | 16394                                             |
| Spectral Size          | 3268                                              |

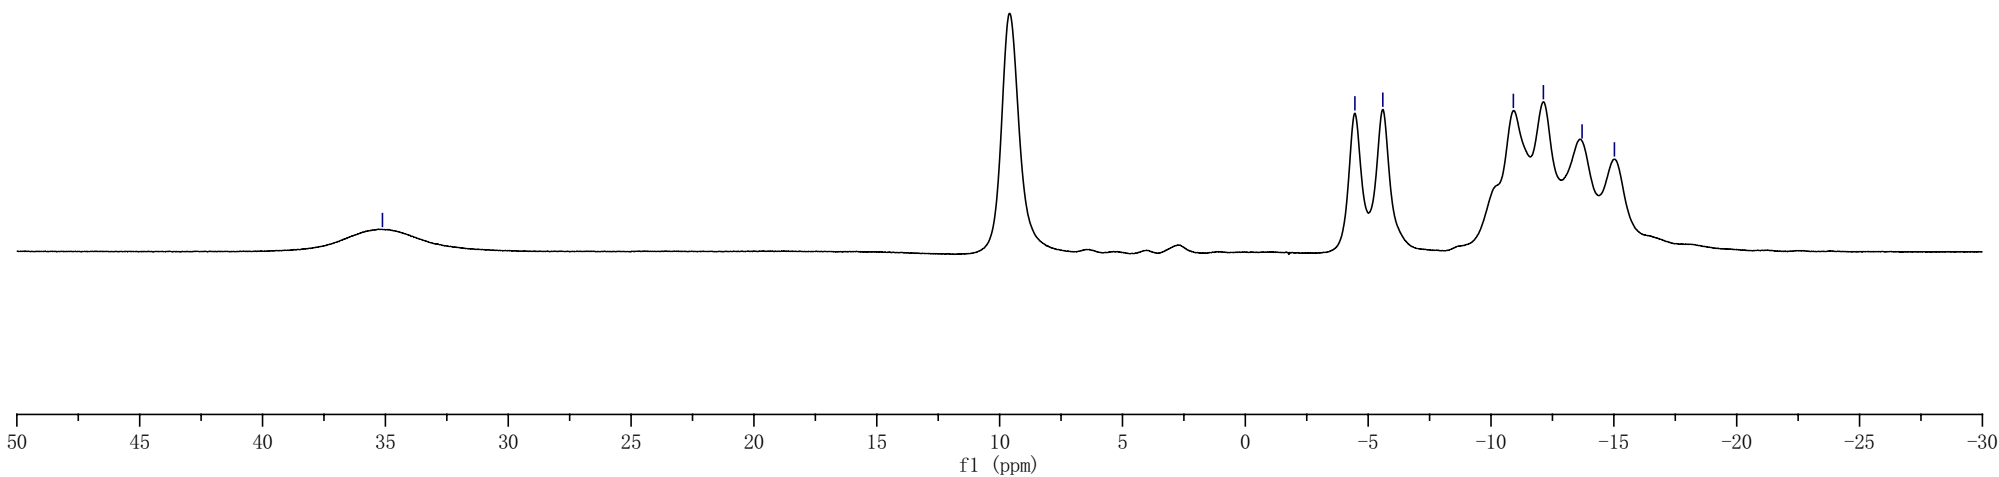

Supplementary Figure 138. <sup>11</sup>B NMR Spectrum of 8b.

crf-8-28-H-CDCl3

7.320

4.065

1.320

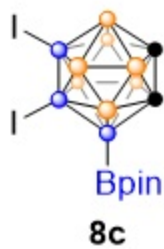

| Parameter        | Value               |
|------------------|---------------------|
| Title            | crf-8-28-H-CDCl3    |
| Comment          | STANDARD 1H CDSERVE |
| Origin           | Varian              |
| Owner            |                     |
| Site             |                     |
| Spectrometer     | mercury             |
| Author           | omc                 |
| Solvent          | CDCl3               |
| Temperature      | 28.0                |
| Pulse Sequence   | zgpg30              |
| Number of Scans  | 8                   |
| Receiver Gain    | 30                  |
| Relaxation Delay | 1.0000              |
| Pulse Width      | 0.0000              |
| Acquisition Date | 2016-03-14 12:25:03 |
| Spectrometer     | 300 CD              |
| Frequency        |                     |
| Spectral Width   | 5494.5              |
| Lowest Frequency | -53.2               |
| Nucleus          | 1H                  |
| Acquired Size    | 10888               |
| Spectral Size    | 3268                |

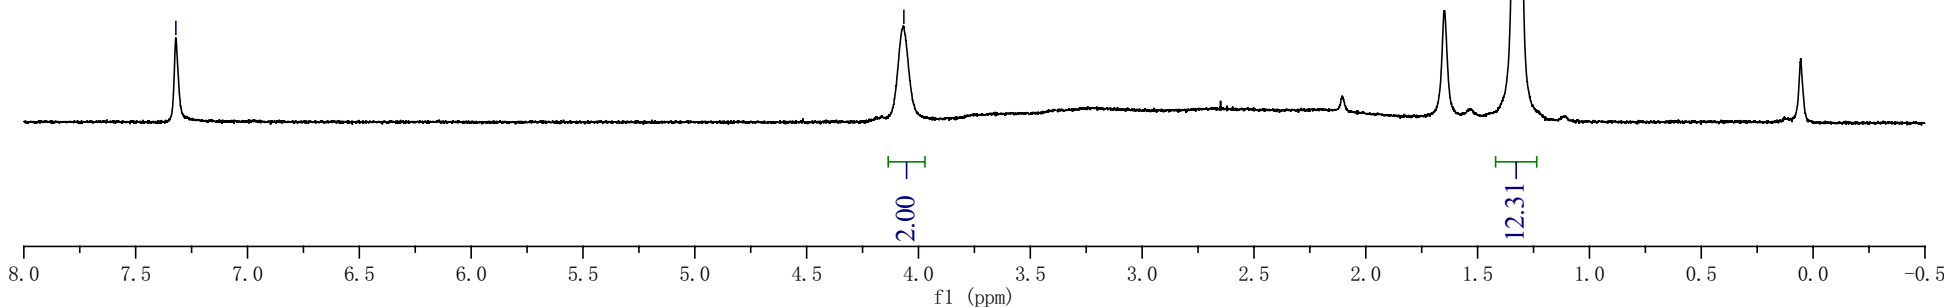

Supplementary Figure 139. <sup>1</sup>H NMR Spectrum of 8c.



crf-8-28-C-CDCl3

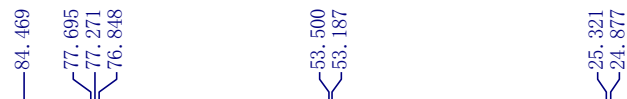

| Parameter              | Value               |
|------------------------|---------------------|
| Title                  | crf-8-28-C-034      |
| Comment                | 13C DEPT-135        |
| Origin                 | Varian              |
| Owner                  |                     |
| Site                   |                     |
| Spectrometer           | mercury             |
| Author                 | omc                 |
| Solvent                | CDCl3               |
| Temperature            | 28.0                |
| Pulse Sequence         | sgzb                |
| Number of Scans        | 1388                |
| Receiver Gain          | 34                  |
| Relaxation Delay       | 1.000               |
| Pulse Width            | 0.000               |
| Acquisition Date       | 2016-03-14 12:30:28 |
| Spectrometer Frequency | 76.45               |
| Spectral Width         | 1901.4              |
| Lowest Frequency       | -4735.0             |
| Nucleus                | 13C                 |
| Acquired Size          | 2637                |
| Spectral Size          | 65536               |

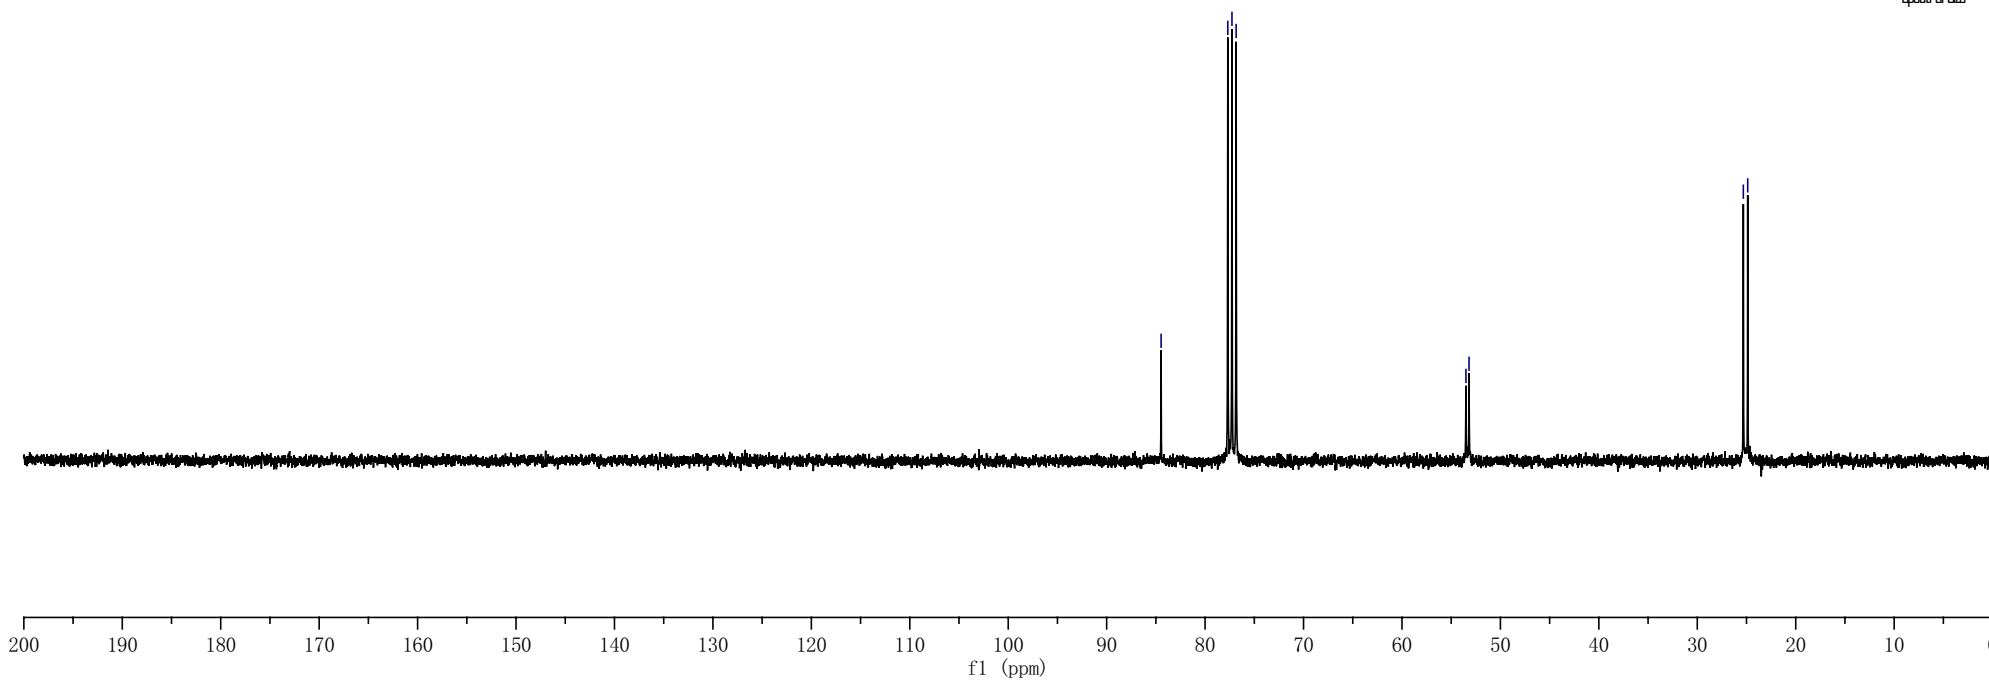

Supplementary Figure 140. <sup>13</sup>C NMR Spectrum of 8c.

33.131

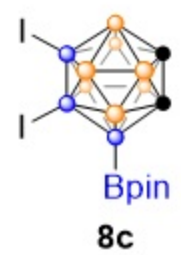

-4.623

-11.745

-13.136

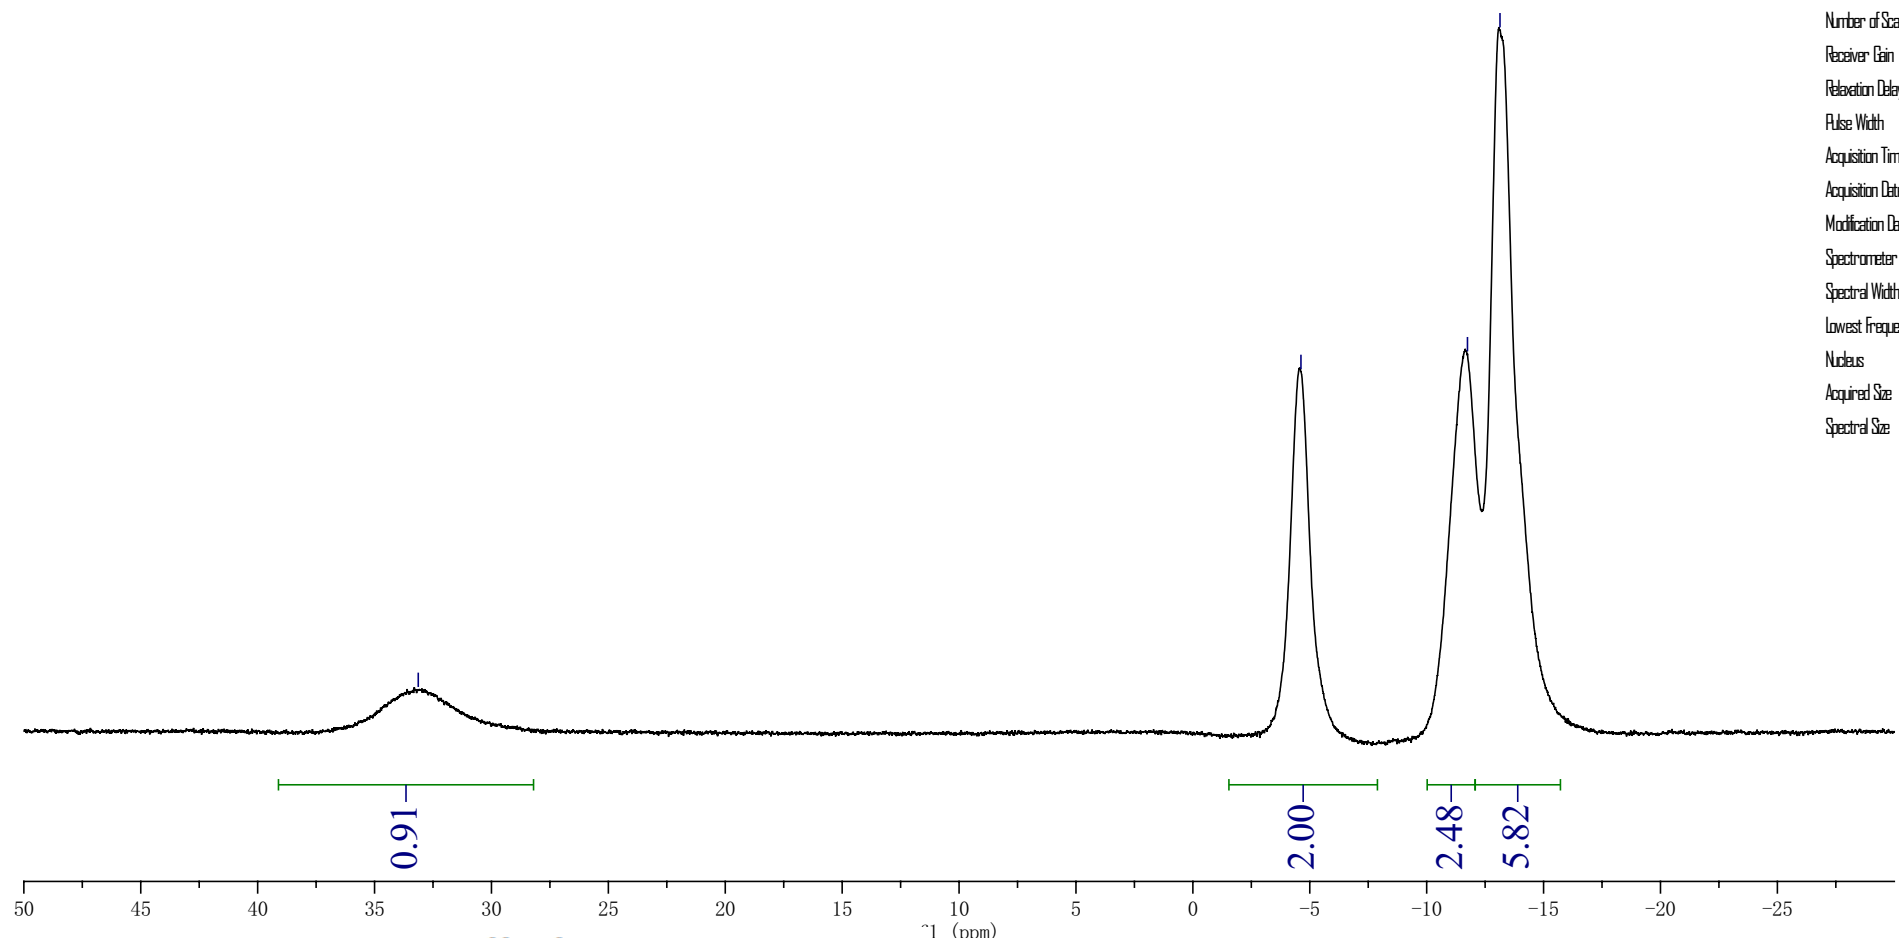

| Parameter              | Value                                                                     |
|------------------------|---------------------------------------------------------------------------|
| Data File Name         | E:/boration/boration/8-28/<br>2135b-cr8-28coupling/2135b-<br>cr8-28/1.fid |
| Title                  | 2135b-cr8-28                                                              |
| Comment                |                                                                           |
| Origin                 | UNMR Bruker Analytische<br>Messtechnik GmbH                               |
| Owner                  | root                                                                      |
| Site                   |                                                                           |
| Spectrometer           | dx400                                                                     |
| Author                 |                                                                           |
| Solvent                | DMSO                                                                      |
| Temperature            | 300.0                                                                     |
| Pulse Sequence         | aring.ty                                                                  |
| Number of Scans        | 80                                                                        |
| Receiver Gain          | 26                                                                        |
| Relaxation Delay       | 1.0000                                                                    |
| Pulse Width            | 8.5000                                                                    |
| Acquisition Time       | 0.512                                                                     |
| Acquisition Date       | 2016-03-15 15:16:04                                                       |
| Modification Date      | 2016-03-15 13:01:20                                                       |
| Spectrometer Frequency | 128.38                                                                    |
| Spectral Width         | 3261.3                                                                    |
| Lowest Frequency       | -1639.5                                                                   |
| Nucleus                | 11B                                                                       |
| Acquired Size          | 16384                                                                     |
| Spectral Size          | 3268                                                                      |

Supplementary Figure 141. <sup>11</sup>B{<sup>1</sup>H} NMR Spectrum of 8c.

crf-8-28-B-coupling-CDC13

33.240

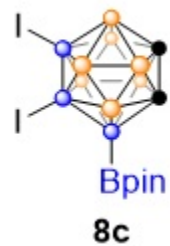

-3.959  
-5.220

-11.187  
-13.076  
-14.207

| Parameter              | Value                                                                         |
|------------------------|-------------------------------------------------------------------------------|
| Data File Name         | E:/boralation/boralation/8-28/2135b-cr8-2-coupling/2135b-cr8-2-coupling/1/fid |
| Title                  | 2135b-cr8-2-coupling                                                          |
| Comment                |                                                                               |
| Origin                 | UNMR Bruker Analytische Messtechnik GmbH                                      |
| Owner                  | root                                                                          |
| Site                   |                                                                               |
| Spectrometer           | dx400                                                                         |
| Author                 |                                                                               |
| Solvent                | DMSO                                                                          |
| Temperature            | 300.0                                                                         |
| Pulse Sequence         | aring.1g                                                                      |
| Number of Scans        | 172                                                                           |
| Receiver Gain          | 26                                                                            |
| Relaxation Delay       | 1.0000                                                                        |
| Pulse Width            | 8.5000                                                                        |
| Acquisition Time       | 0.912                                                                         |
| Acquisition Date       | 2016-03-15 15:18:48                                                           |
| Modification Date      | 2016-03-15 13:01:15                                                           |
| Spectrometer Frequency | 128.38                                                                        |
| Spectral Width         | 3261.3                                                                        |
| Lowest Frequency       | -1630.5                                                                       |
| Nucleus                | 11B                                                                           |
| Acquired Size          | 16394                                                                         |
| Spectral Size          | 3268                                                                          |

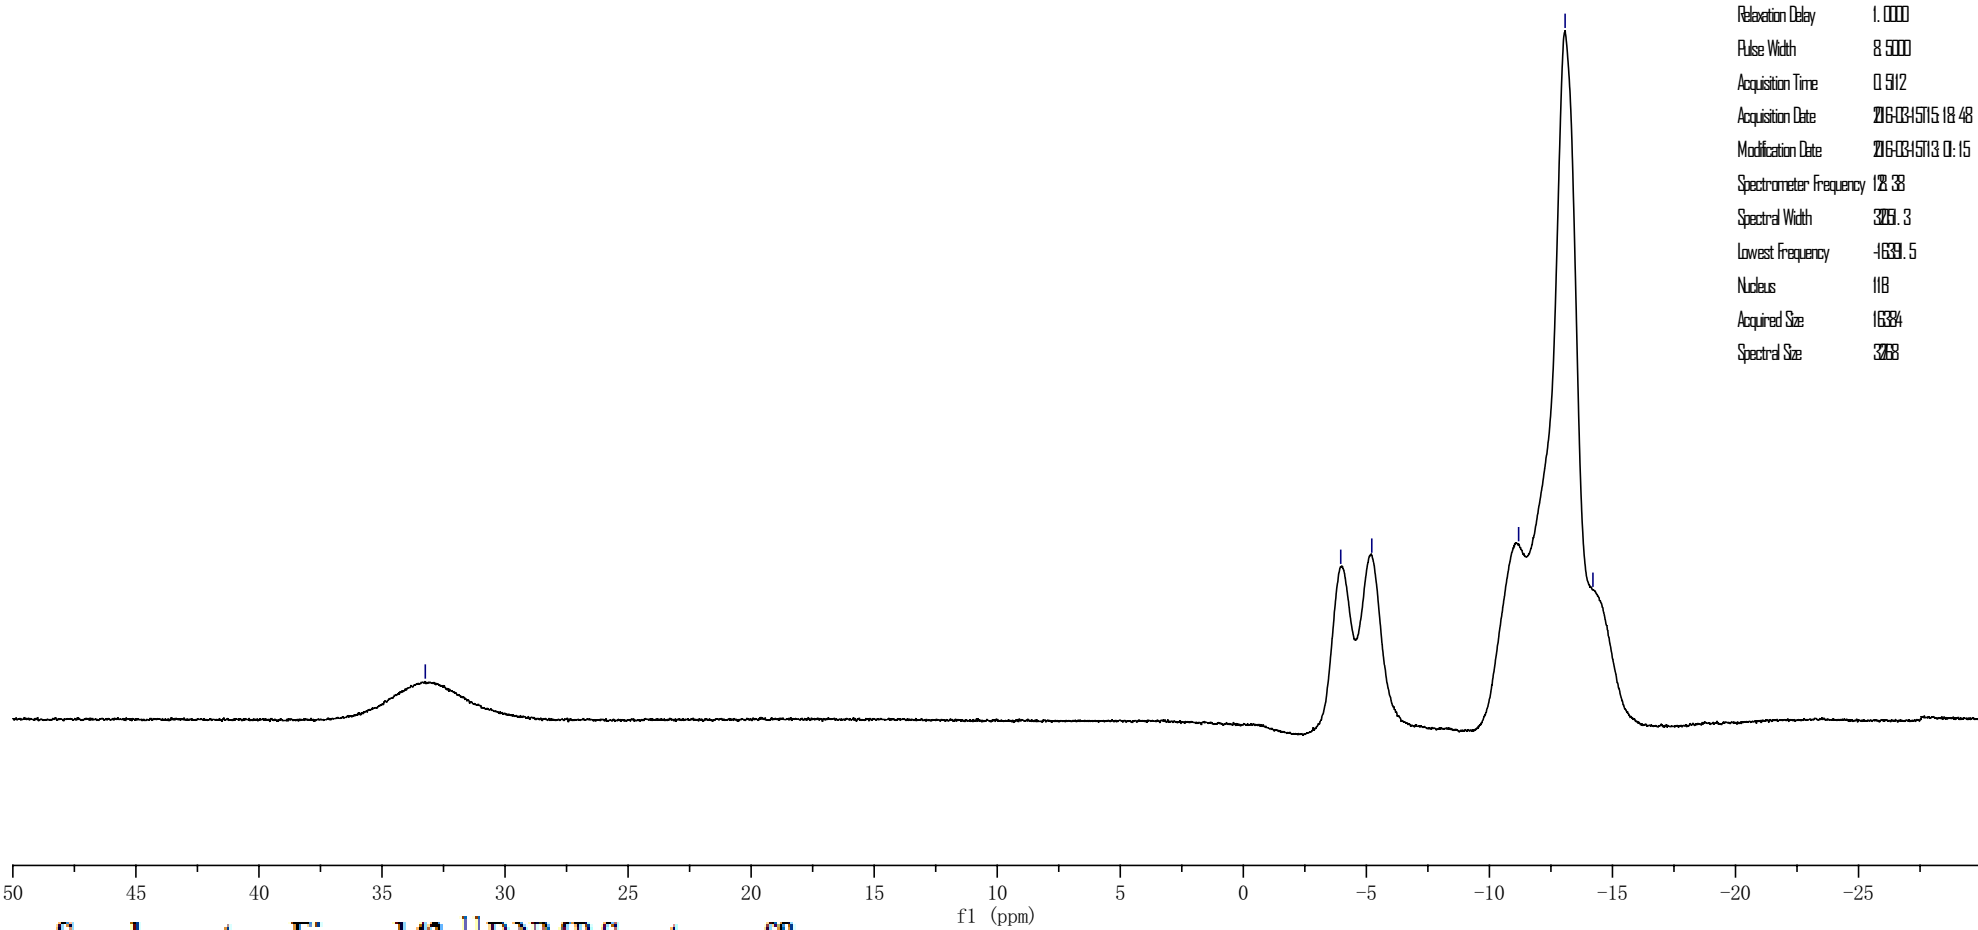

Supplementary Figure 142. <sup>11</sup>B NMR Spectrum of 8c.

crf-5-11-H-CDCl<sub>3</sub>

7.635  
7.612  
7.430  
7.406  
7.393  
7.369  
7.347  
7.260

3.853

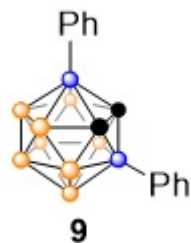

| Parameter              | Value               |
|------------------------|---------------------|
| Title                  | crf511-H            |
| Comment                | STANDARD 1H OBSERVE |
| Origin                 | Varian              |
| Owner                  |                     |
| Site                   |                     |
| Spectrometer           | mercury             |
| Author                 | omc                 |
| Solvent                | CDCl <sub>3</sub>   |
| Temperature            | 28.0                |
| Pulse Sequence         | sput                |
| Number of Scans        | 8                   |
| Receiver Gain          | 34                  |
| Relaxation Delay       | 1.0000              |
| Pulse Width            | 0.0000              |
| Acquisition Date       | 2015-06-20 12:03:02 |
| Spectrometer Frequency | 300.03              |
| Spectral Width         | 5494.5              |
| Lowest Frequency       | -71.0               |
| Nucleus                | <sup>1</sup> H      |
| Acquired Size          | 10975               |
| Spectral Size          | 3268                |

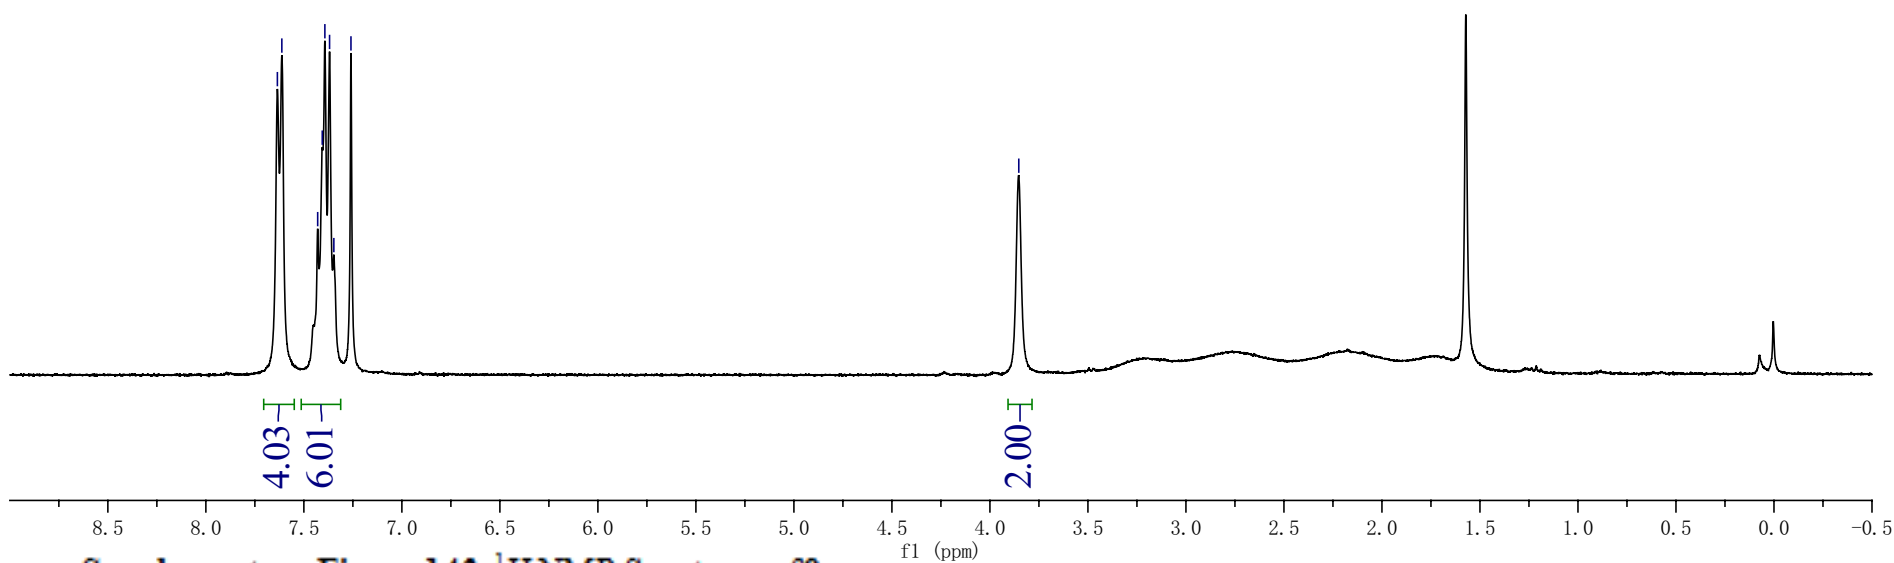

Supplementary Figure 143. <sup>1</sup>H NMR Spectrum of 9.

crf-5-11-C-CDCl<sub>3</sub>

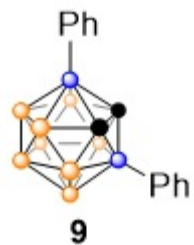

133.394  
130.060  
128.553

77.716  
77.293  
76.869

59.325

| Parameter              | Value               |
|------------------------|---------------------|
| Title                  | crf5-11-C           |
| Comment                | 13C OBSERVE         |
| Origin                 | Varian              |
| Owner                  |                     |
| Site                   |                     |
| Spectrometer           | mercury             |
| Author                 | omc                 |
| Solvent                | CDCl <sub>3</sub>   |
| Temperature            | 28.0                |
| Pulse Sequence         | squl                |
| Number of Scans        | 404                 |
| Receiver Gain          | 34                  |
| Relaxation Delay       | 1.0000              |
| Pulse Width            | 0.0000              |
| Acquisition Date       | 2015-06-20 12:21:53 |
| Spectrometer Frequency | 75.45               |
| Spectral Width         | 18887.0             |
| Lowest Frequency       | -1627.8             |
| Nucleus                | 13C                 |
| Acquired Size          | 28155               |
| Spectral Size          | 65536               |

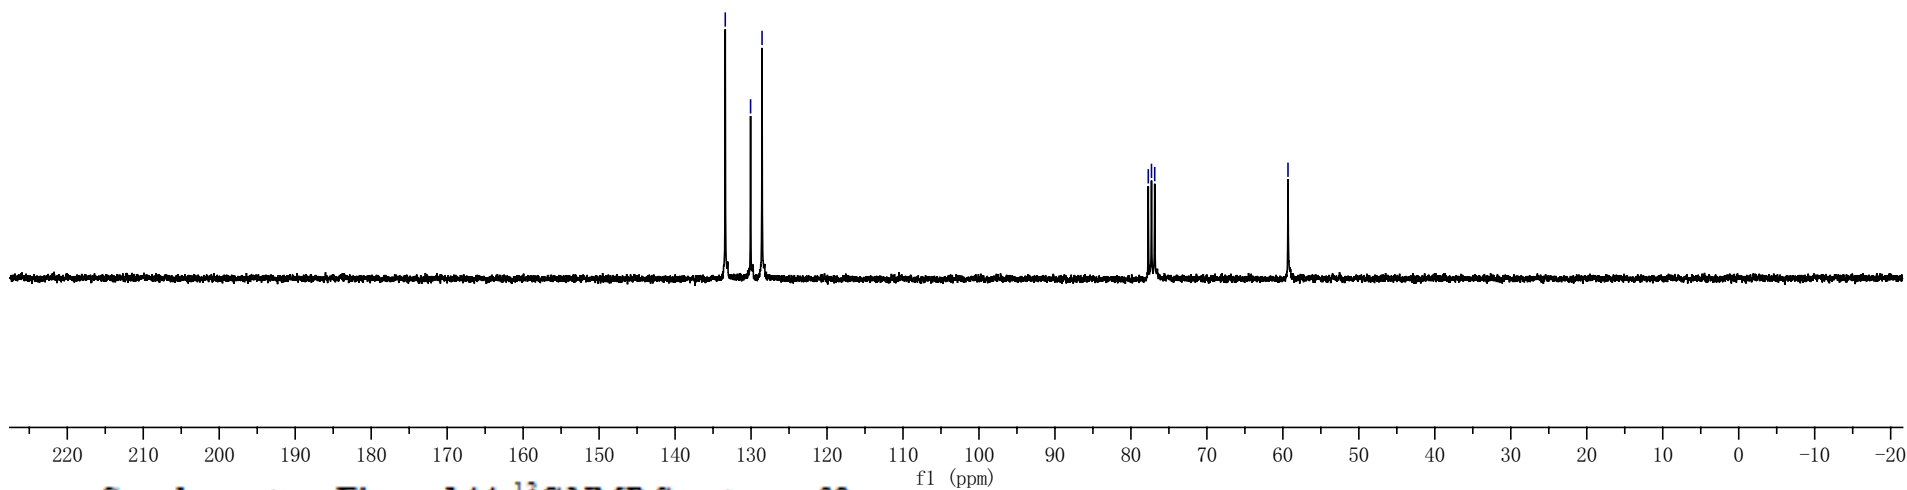

Supplementary Figure 144. <sup>13</sup>C NMR Spectrum of 9.

crf-5-11-B-decoupling-CDCl<sub>3</sub>

| Parameter              | Value                                                                    |
|------------------------|--------------------------------------------------------------------------|
| Data File Name         | C:/Users/Administrator/Desktop/work/送样<br>NMR/borolabium/5H/b-crfs5H/fid |
| Title                  | 5H                                                                       |
| Comment                |                                                                          |
| Origin                 | UNMR Bruker Analytische Messtechnik GmbH                                 |
| Owner                  | root                                                                     |
| Site                   |                                                                          |
| Spectrometer           | dx400                                                                    |
| Author                 |                                                                          |
| Solvent                | DMSO                                                                     |
| Temperature            | 300.0                                                                    |
| Pulse Sequence         | aring1gy                                                                 |
| Number of Scans        | 800                                                                      |
| Receiver Gain          | 32                                                                       |
| Relaxation Delay       | 0.0000                                                                   |
| Pulse Width            | 13.4000                                                                  |
| Acquisition Time       | 0.395                                                                    |
| Acquisition Date       | 2015-06-20 10:30                                                         |
| Modification Date      | 2015-06-20 14:03:00                                                      |
| Spectrometer Frequency | 128.38                                                                   |
| Spectral Width         | 9.2821                                                                   |
| Lowest Frequency       | -17920.9                                                                 |
| Nucleus                | <sup>11</sup> B                                                          |
| Acquired Size          | 16584                                                                    |
| Spectral Size          | 3068                                                                     |

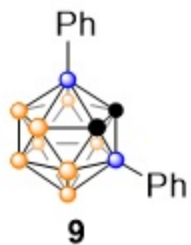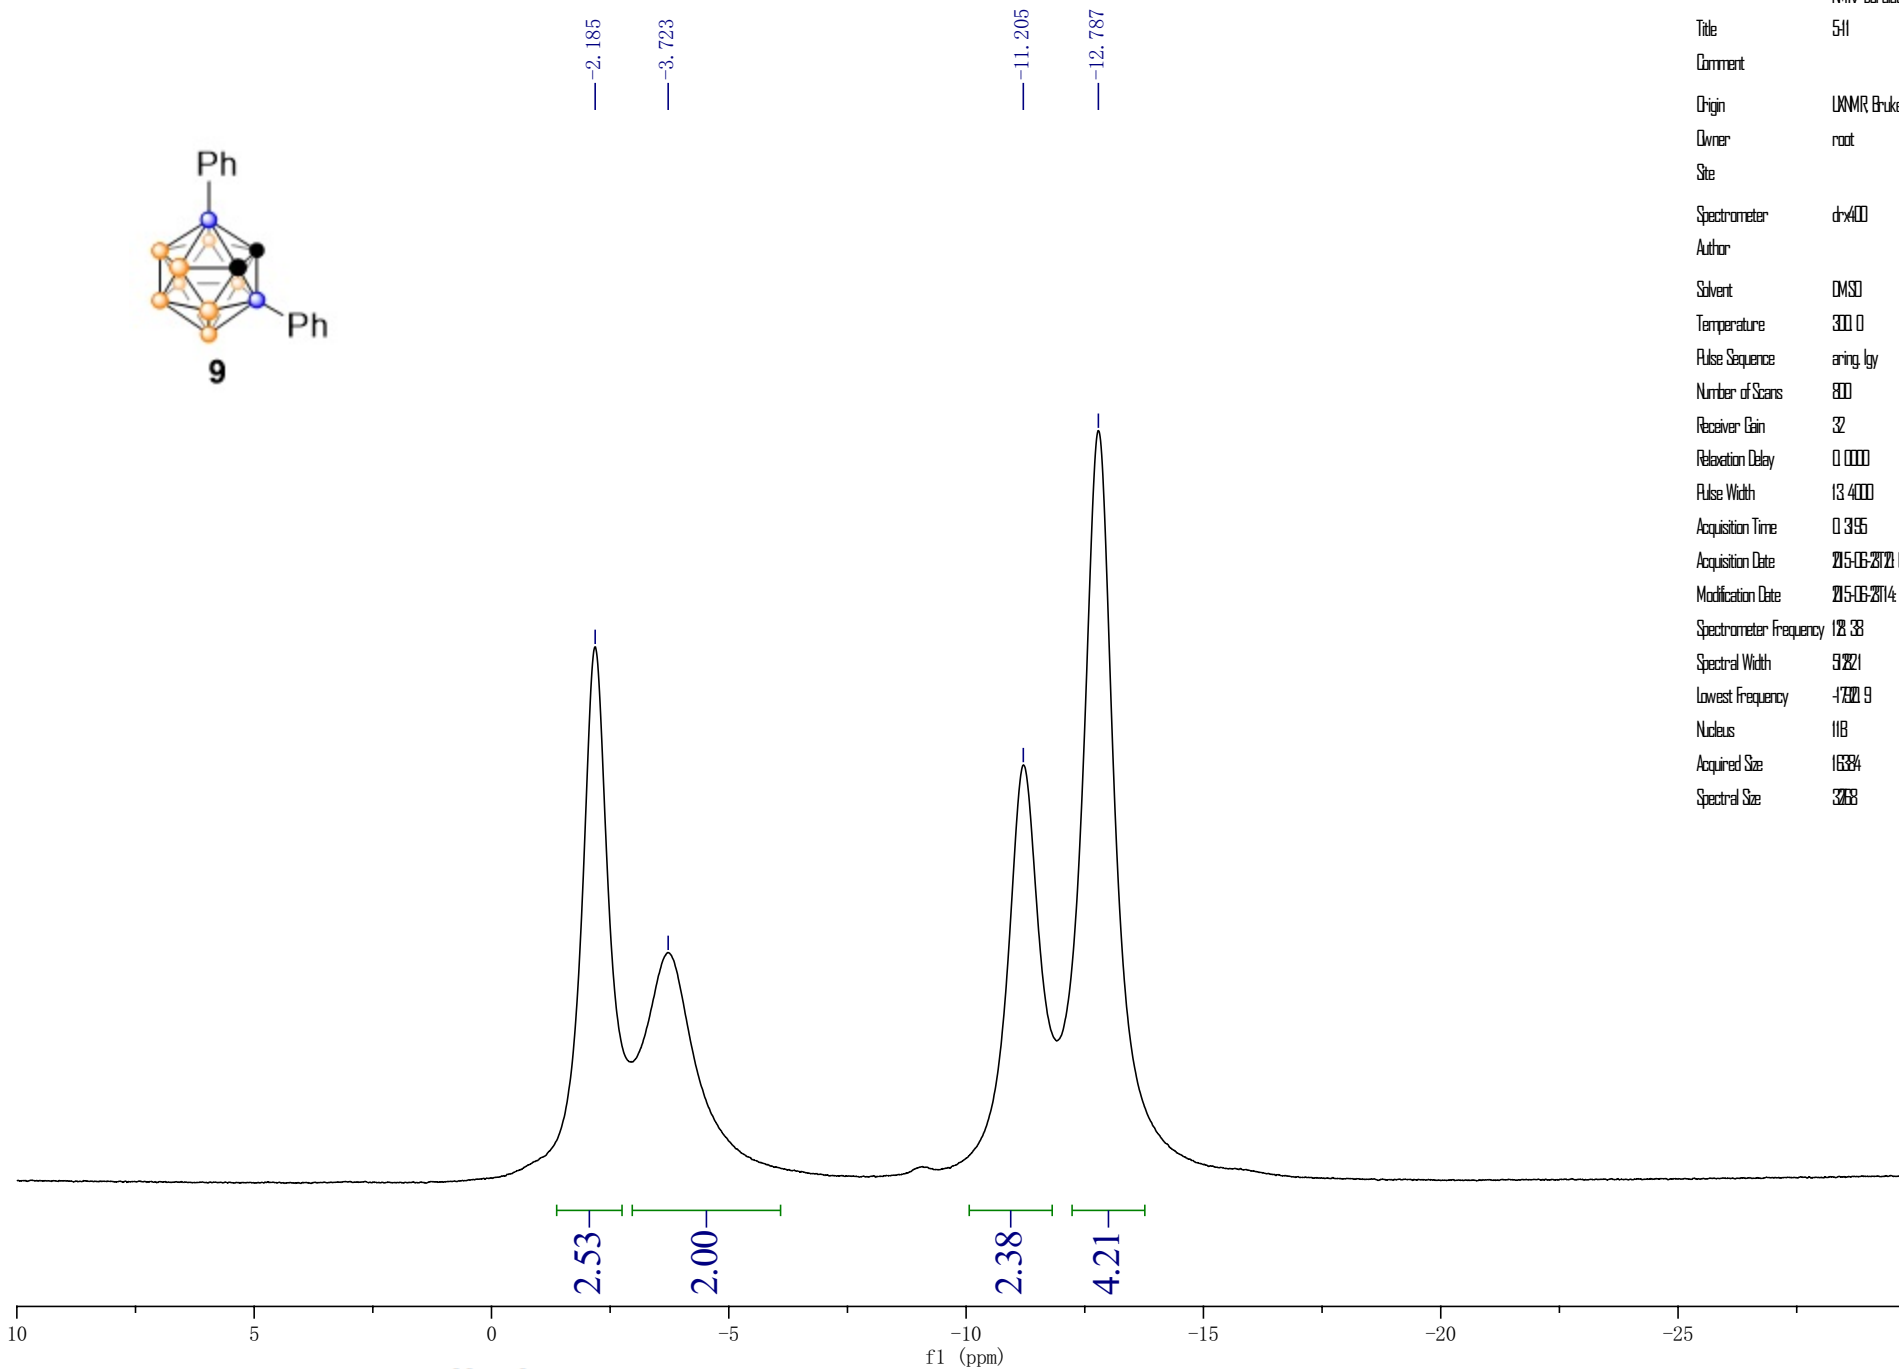

Supplementary Figure 145. <sup>11</sup>B{<sup>1</sup>H} NMR Spectrum of **9**.

crf-5-11-B-coupling-CDCl<sub>3</sub>

—1.593

—2.760

—3.659

—10.622

—12.046

—13.400

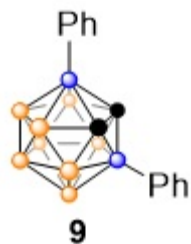

| Parameter              | Value                                                                   |
|------------------------|-------------------------------------------------------------------------|
| Data File Name         | C:/Users/Administrator/Desktop/work/送样 NMR/borabatom/5-11/b-crf5-11/fid |
| Title                  | 5-11                                                                    |
| Comment                |                                                                         |
| Origin                 | LUMMR Bruker Analytische Messtechnik GmbH                               |
| Owner                  | root                                                                    |
| Site                   |                                                                         |
| Spectrometer           | dx400                                                                   |
| Author                 |                                                                         |
| Solvent                | DMSO                                                                    |
| Temperature            | 300.0                                                                   |
| Pulse Sequence         | aring.1gy                                                               |
| Number of Scans        | 800                                                                     |
| Receiver Gain          | 32                                                                      |
| Relaxation Delay       | 0.0000                                                                  |
| Pulse Width            | 13.4000                                                                 |
| Acquisition Time       | 0.3195                                                                  |
| Acquisition Date       | 21-5-16-2017 14:42                                                      |
| Modification Date      | 21-5-16-2017 14:00                                                      |
| Spectrometer Frequency | 128.38                                                                  |
| Spectral Width         | 5.2821                                                                  |
| Lowest Frequency       | -16333.9                                                                |
| Nucleus                | 11B                                                                     |
| Acquired Size          | 16334                                                                   |
| Spectral Size          | 3268                                                                    |

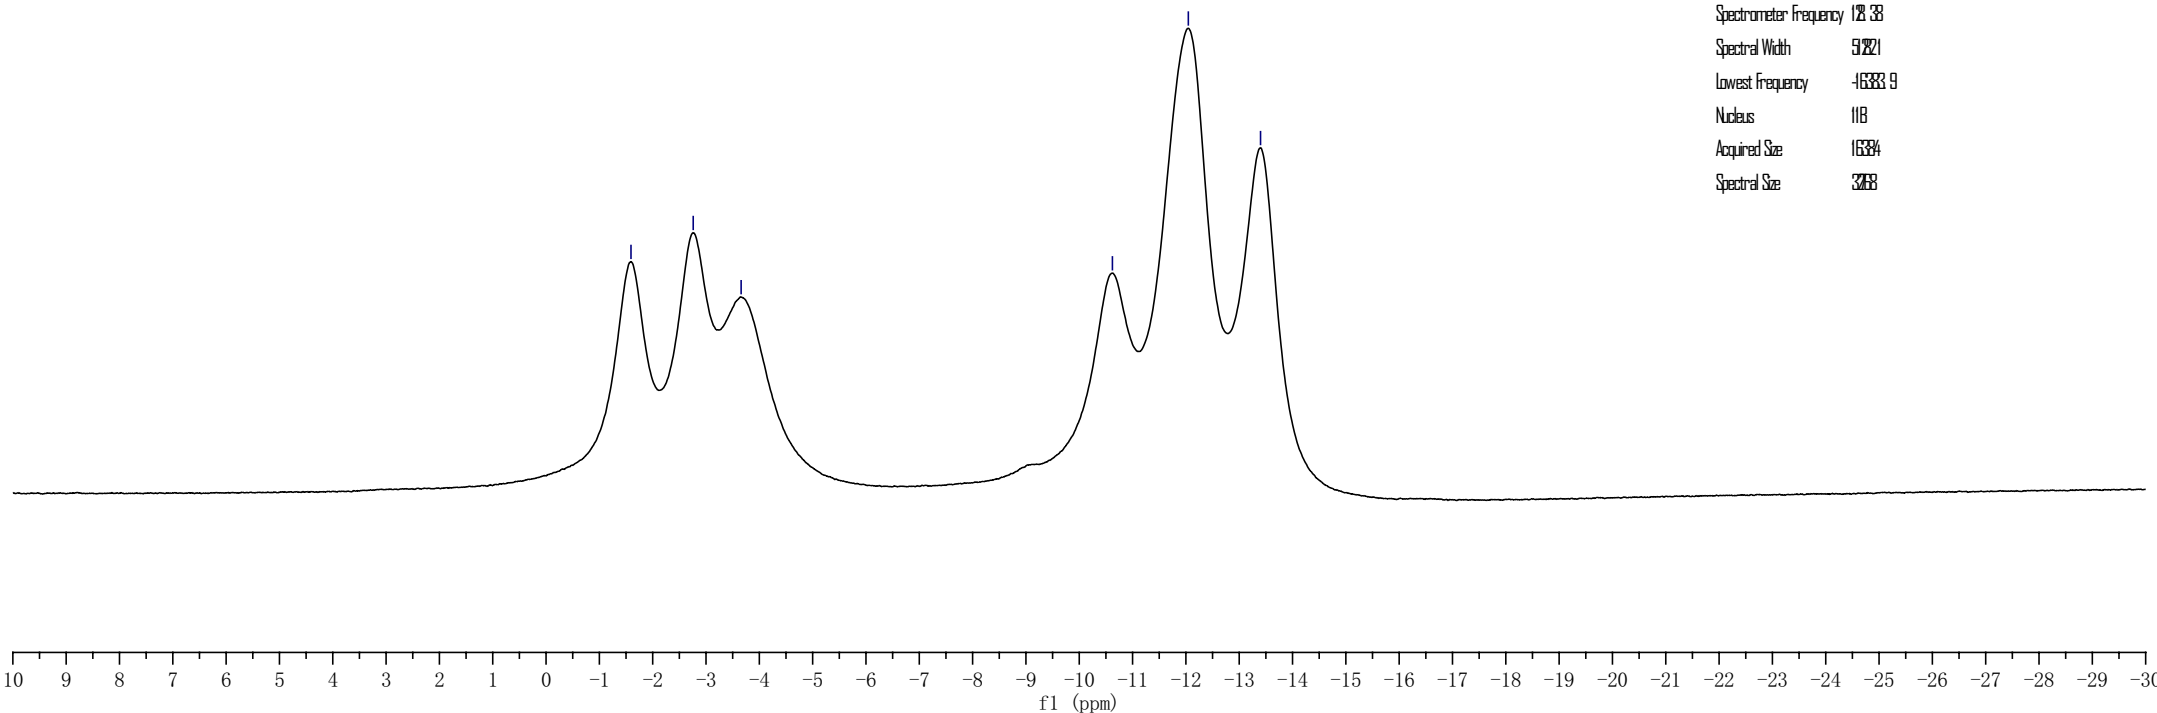

Supplementary Figure 146. <sup>11</sup>B NMR Spectrum of 9.

S167

crf-6-58-H-CDCl3

| Parameter              | Value             |
|------------------------|-------------------|
| Title                  | crf-6-58-H-CDCl3  |
| Comment                | STANDARD OBSERVE  |
| Origin                 | Varien            |
| Owner                  |                   |
| Site                   |                   |
| Spectrometer           | mercury           |
| Author                 | onc               |
| Solvent                | CDCl3             |
| Temperature            | 28.0              |
| Pulse Sequence         | sgui              |
| Number of Scans        | 8                 |
| Receiver Gain          | 24                |
| Relaxation Delay       | 1.0000            |
| Pulse Width            | 0.0000            |
| Acquisition Date       | 20151013 16:30:13 |
| Spectrometer Frequency | 300.03            |
| Spectral Width         | 5494.5            |
| Lowest Frequency       | -71.0             |
| Nucleus                | 1H                |
| Acquired Size          | 10376             |
| Spectral Size          | 3268              |

7.260

5.875  
5.848  
5.815  
5.792  
5.758  
5.732

4.983  
4.966  
4.879

3.250

2.023  
1.998

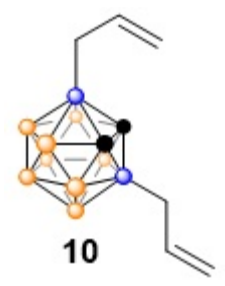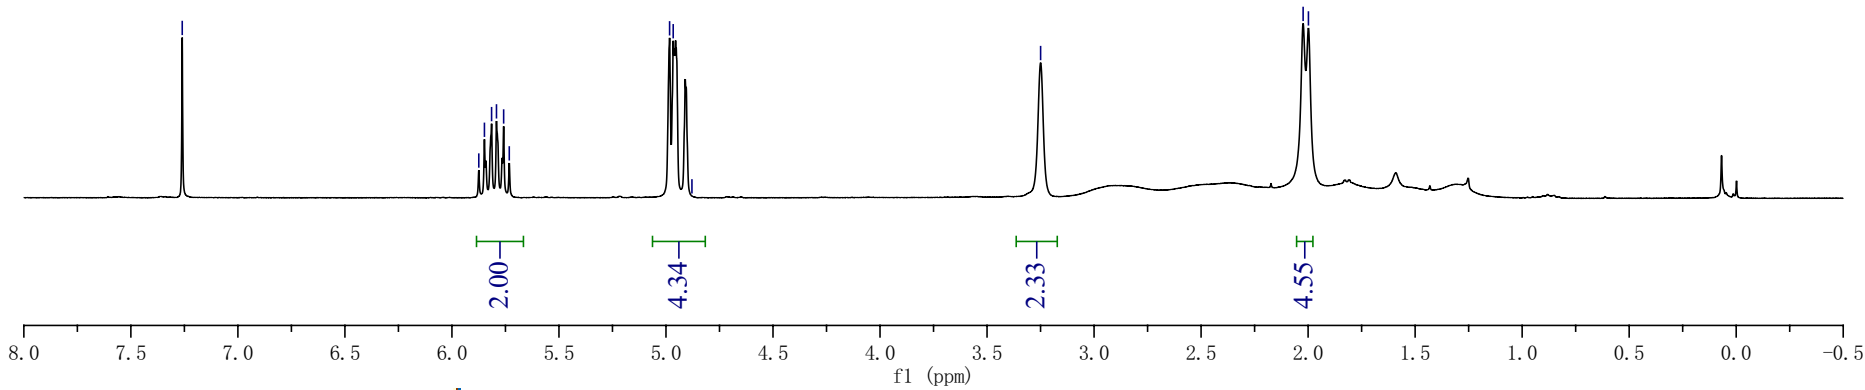

Supplementary Figure 147. <sup>1</sup>H NMR Spectrum of 10.



crf-6-58-C-CDCl3

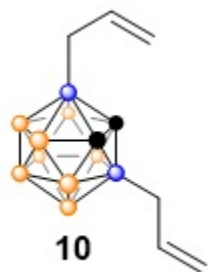

136.082

115.832

77.719  
77.296  
76.872

57.763

| Parameter              | Value               |
|------------------------|---------------------|
| Title                  | crf-6-58-C          |
| Comment                | 13C OBSERVE         |
| Origin                 | Varian              |
| Owner                  |                     |
| Site                   |                     |
| Spectrometer           | mercury             |
| Author                 | omc                 |
| Solvent                | CDCl3               |
| Temperature            | 21.0                |
| Pulse Sequence         | zg31                |
| Number of Scans        | 44                  |
| Receiver Gain          | 30                  |
| Relaxation Delay       | 1.0000              |
| Pulse Width            | 0.0000              |
| Acquisition Date       | 2015-10-08 12:48:01 |
| Spectrometer Frequency | 76.45               |
| Spectral Width         | 20000.0             |
| Lowest Frequency       | -288.3              |
| Nucleus                | 13C                 |
| Acquired Size          | 2888                |
| Spectral Size          | 65536               |

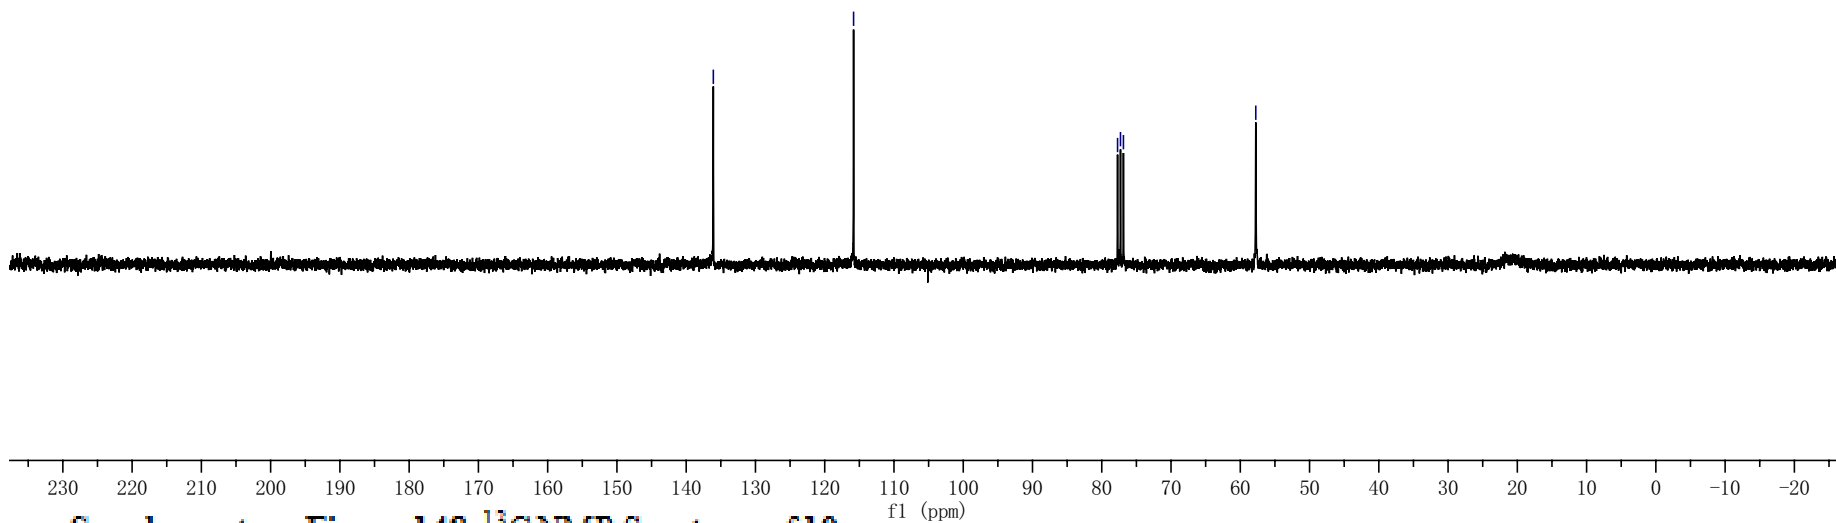

Supplementary Figure 148. <sup>13</sup>C NMR Spectrum of 10.

crf-6-58-B-decoupling-CDC13

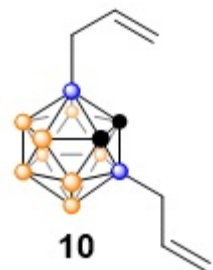

-2.322

-4.029

-12.375

| Parameter              | Value                                     |
|------------------------|-------------------------------------------|
| Data File Name         | E:/nmr/b-cr-f6-58/fid                     |
| Title                  | nmr                                       |
| Comment                |                                           |
| Origin                 | LNMNR Bruker Analytische Messtechnik GmbH |
| Owner                  | root                                      |
| Site                   |                                           |
| Spectrometer           | chr400                                    |
| Author                 |                                           |
| Solvent                | DMSO                                      |
| Temperature            | 300.0                                     |
| Pulse Sequence         | aring.tgy                                 |
| Number of Scans        | 266                                       |
| Receiver Gain          | 32                                        |
| Relaxation Delay       | 0.0000                                    |
| Pulse Width            | 13.4000                                   |
| Acquisition Time       | 0.4260                                    |
| Acquisition Date       | 2015-04-09T15:12:03                       |
| Modification Date      | 2015-04-09T08:12:00                       |
| Spectrometer Frequency | 128.38                                    |
| Spectral Width         | 38963.5                                   |
| Lowest Frequency       | -19333.4                                  |
| Nucleus                | <sup>11</sup> B                           |
| Acquired Size          | 16384                                     |
| Spectral Size          | 3268                                      |

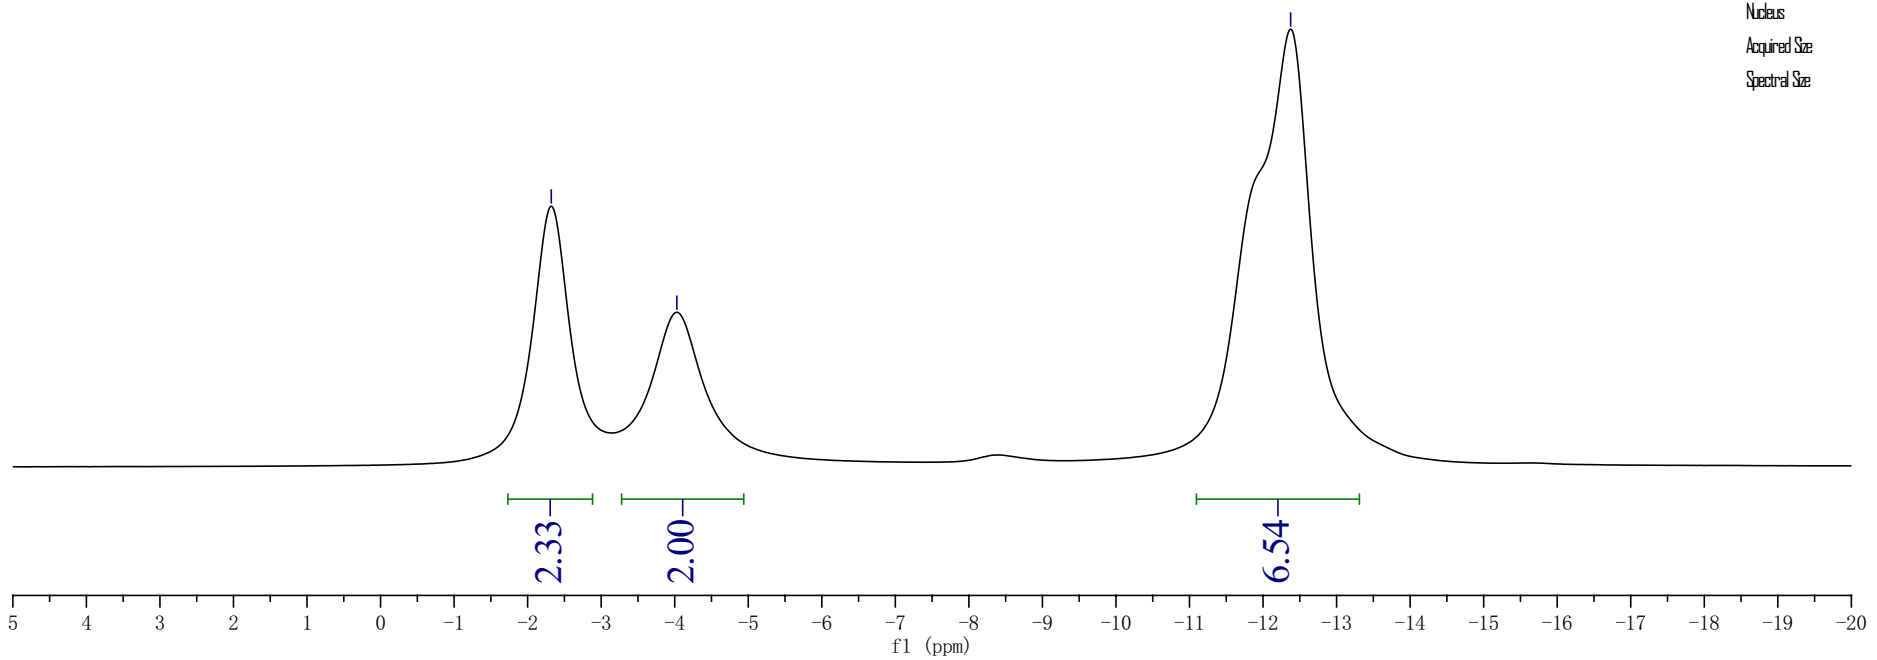

Supplementary Figure 149. <sup>11</sup>B{<sup>1</sup>H} NMR Spectrum of 10.

crf-6-58-B-coupling-CDC13

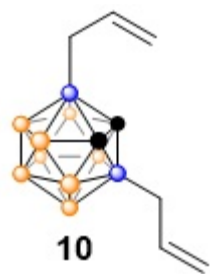

-1.754

-2.909

-4.038

-11.773

-12.435

-13.022

| Parameter              | Value                                    |
|------------------------|------------------------------------------|
| Data File Name         | E:/nmr/b-cr-f6-58-coupling/1d            |
| Title                  | nmr                                      |
| Comment                |                                          |
| Origin                 | UNMR Bruker Analytische Messtechnik GmbH |
| Owner                  | root                                     |
| Site                   |                                          |
| Spectrometer           | dx400                                    |
| Author                 |                                          |
| Solvent                | DMSO                                     |
| Temperature            | 300.0                                    |
| Pulse Sequence         | aring.tgy                                |
| Number of Scans        | 512                                      |
| Receiver Gain          | 32                                       |
| Relaxation Delay       | 0.0000                                   |
| Pulse Width            | 13.4000                                  |
| Acquisition Time       | 0.4260                                   |
| Acquisition Date       | 2015-04-09T15:14:2                       |
| Modification Date      | 2015-04-09T08:18:00                      |
| Spectrometer Frequency | 128.38                                   |
| Spectral Width         | 3946.5                                   |
| Lowest Frequency       | -19810.3                                 |
| Nucleus                | 11B                                      |
| Acquired Size          | 16394                                    |
| Spectral Size          | 3268                                     |

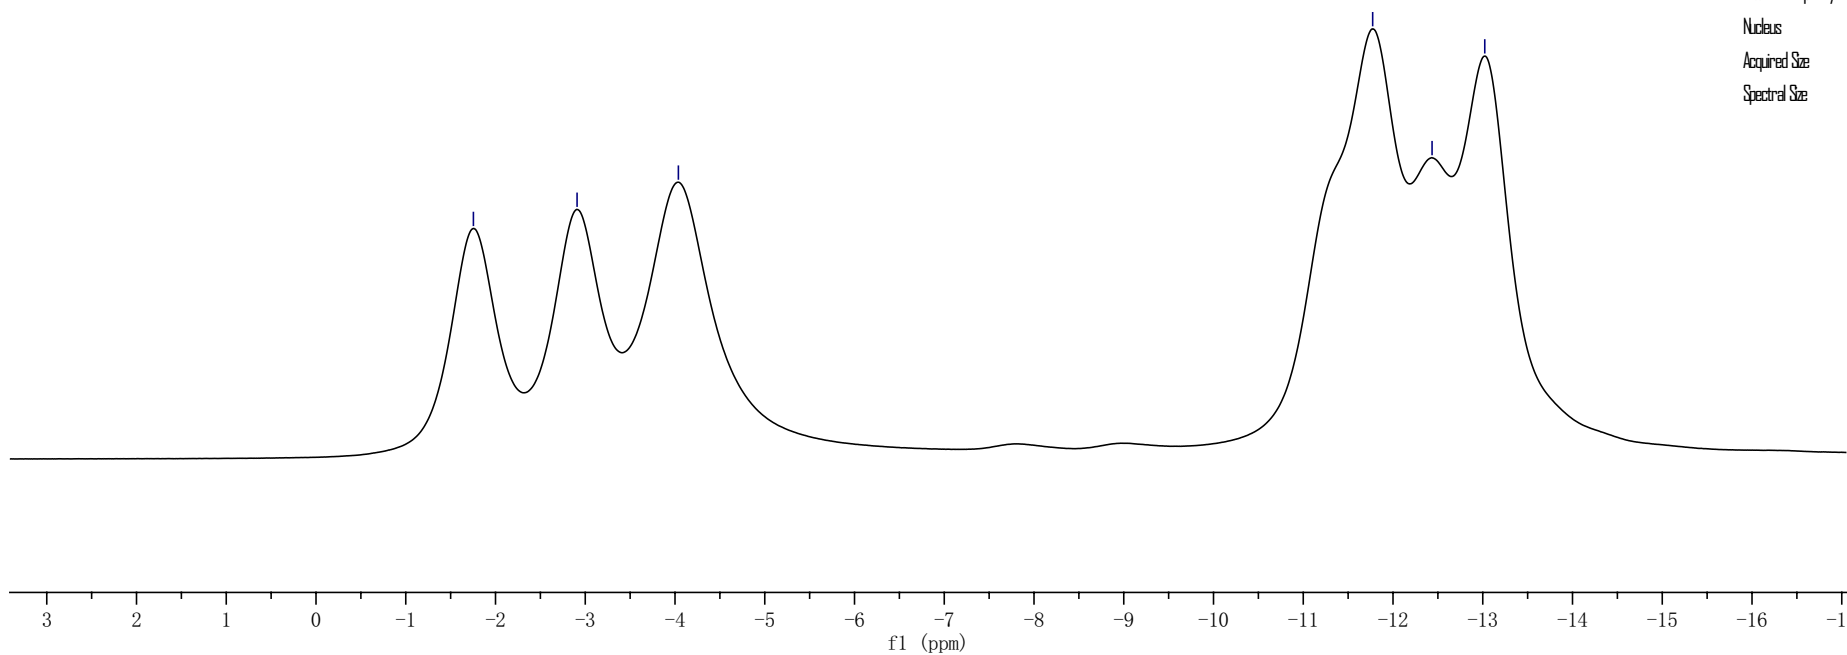

Supplementary Figure 150.  $^{11}\text{B}$  NMR Spectrum of 10.

crf-6-11-H-CDC13

7.260

4.141

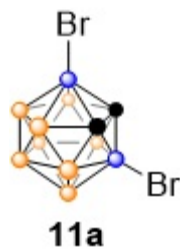

| Parameter              | Value               |
|------------------------|---------------------|
| Title                  | crf-6-11-H-CDC13    |
| Comment                |                     |
| Origin                 | Varian              |
| Owner                  |                     |
| Site                   |                     |
| Spectrometer           | mercury             |
| Author                 | omc                 |
| Solvent                | CDCl3               |
| Temperature            | 29.0                |
| Pulse Sequence         | sgdd                |
| Number of Scans        | 8                   |
| Receiver Gain          | 2                   |
| Relaxation Delay       | 1.0000              |
| Pulse Width            | 0.0000              |
| Acquisition Date       | 2015-09-10 17:43:10 |
| Spectrometer Frequency | 300.03              |
| Spectral Width         | 5494.5              |
| Lowest Frequency       | -708.0              |
| Nucleus                | <sup>1</sup> H      |
| Acquired Size          | 10870               |
| Spectral Size          | 3268                |

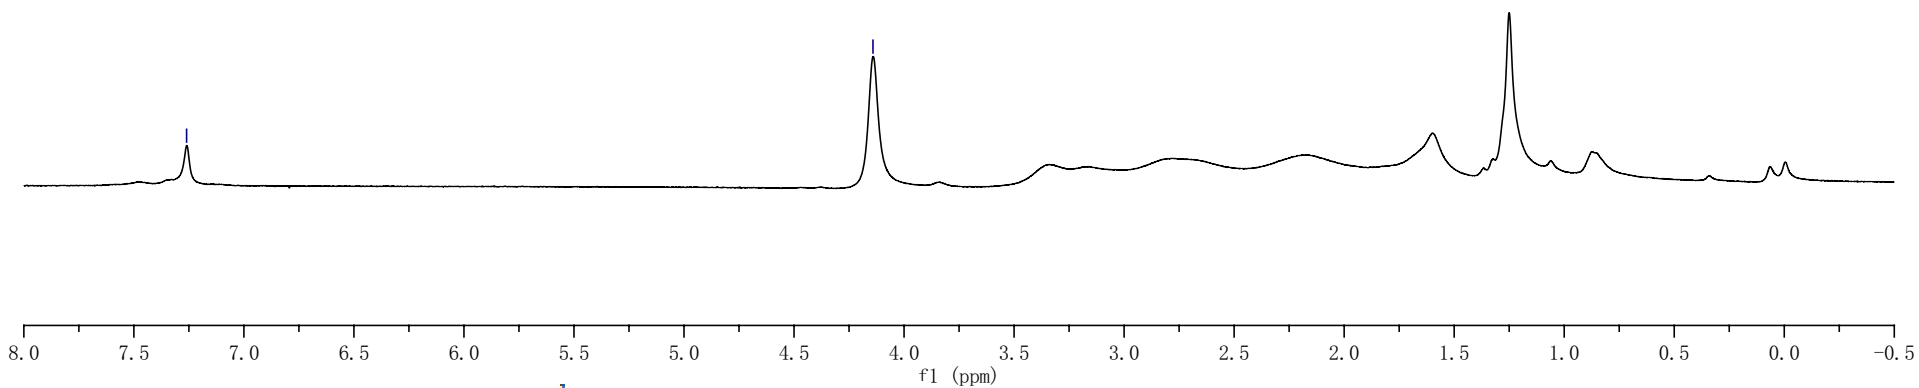

Supplementary Figure 151. <sup>1</sup>H NMR Spectrum of 11a.

crf-6-11-C-CDCl3

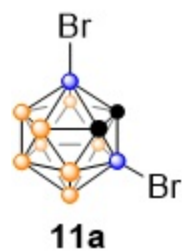

77.675  
77.250  
76.826  
— 63.498

| Parameter              | Value               |
|------------------------|---------------------|
| Title                  | crf6-11-C-CDCl3     |
| Comment                | 13C OBSERVE         |
| Origin                 | Varian              |
| Owner                  |                     |
| Site                   |                     |
| Spectrometer           | mercury             |
| Author                 | omc                 |
| Solvent                | CDCl3               |
| Temperature            | 28.0                |
| Pulse Sequence         | squl                |
| Number of Scans        | 68                  |
| Receiver Gain          | 30                  |
| Relaxation Delay       | 1.0000              |
| Pulse Width            | 0.0000              |
| Acquisition Date       | 2015-09-10 17:44:11 |
| Spectrometer Frequency | 75.45               |
| Spectral Width         | 2000.0              |
| Lowest Frequency       | -2183.3             |
| Nucleus                | 13C                 |
| Acquired Size          | 28888               |
| Spectral Size          | 65536               |

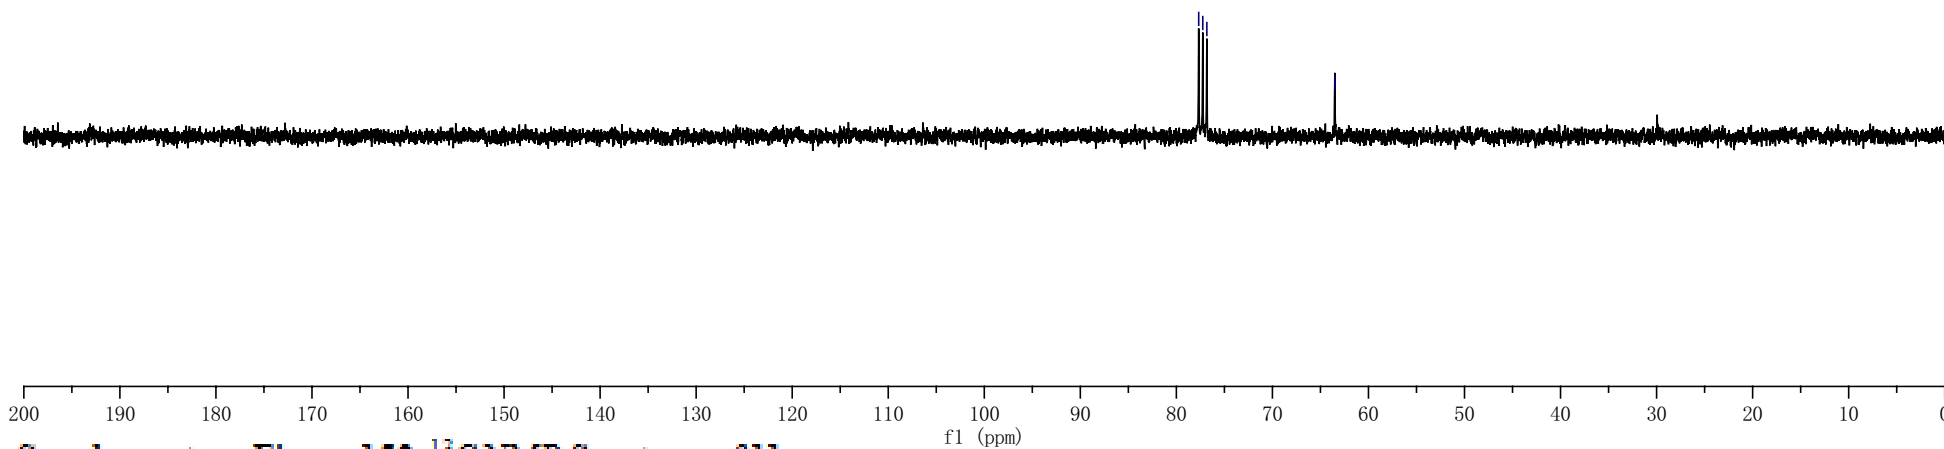

Supplementary Figure 152. <sup>13</sup>C NMR Spectrum of 11a.

crf-6-11-B-decoupling-CDCl3

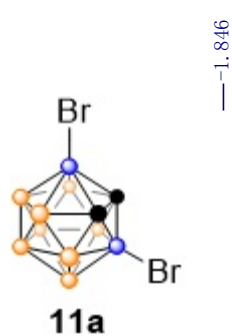

-1.846

-11.446  
-12.262

| Parameter              | Value                                                                |
|------------------------|----------------------------------------------------------------------|
| Data file Name         | G:/Users/Administrator/Desktop/work/送样NMR/borablation/GH/b-crF6H/fid |
| Title                  | GH                                                                   |
| Comment                |                                                                      |
| Origin                 | UNMR, Bruker Analytische Messtechnik GmbH                            |
| Owner                  | root                                                                 |
| Site                   |                                                                      |
| Spectrometer           | dmx400                                                               |
| Author                 |                                                                      |
| Solvent                | DMSO                                                                 |
| Temperature            | 300.0                                                                |
| Pulse Sequence         | aring.tgy                                                            |
| Number of Scans        | 133                                                                  |
| Receiver Gain          | 32                                                                   |
| Relaxation Delay       | 0.0000                                                               |
| Pulse Width            | 13.4000                                                              |
| Acquisition Time       | 0.480                                                                |
| Acquisition Date       | 2015-09-11 22:00:33                                                  |
| Modification Date      | 2015-09-11 16:01:00                                                  |
| Spectrometer Frequency | 128.38                                                               |
| Spectral Width         | 33461.5                                                              |
| Lowest Frequency       | -15166.0                                                             |
| Nucleus                | 11B                                                                  |
| Acquired Size          | 16384                                                                |
| Spectral Size          | 3268                                                                 |

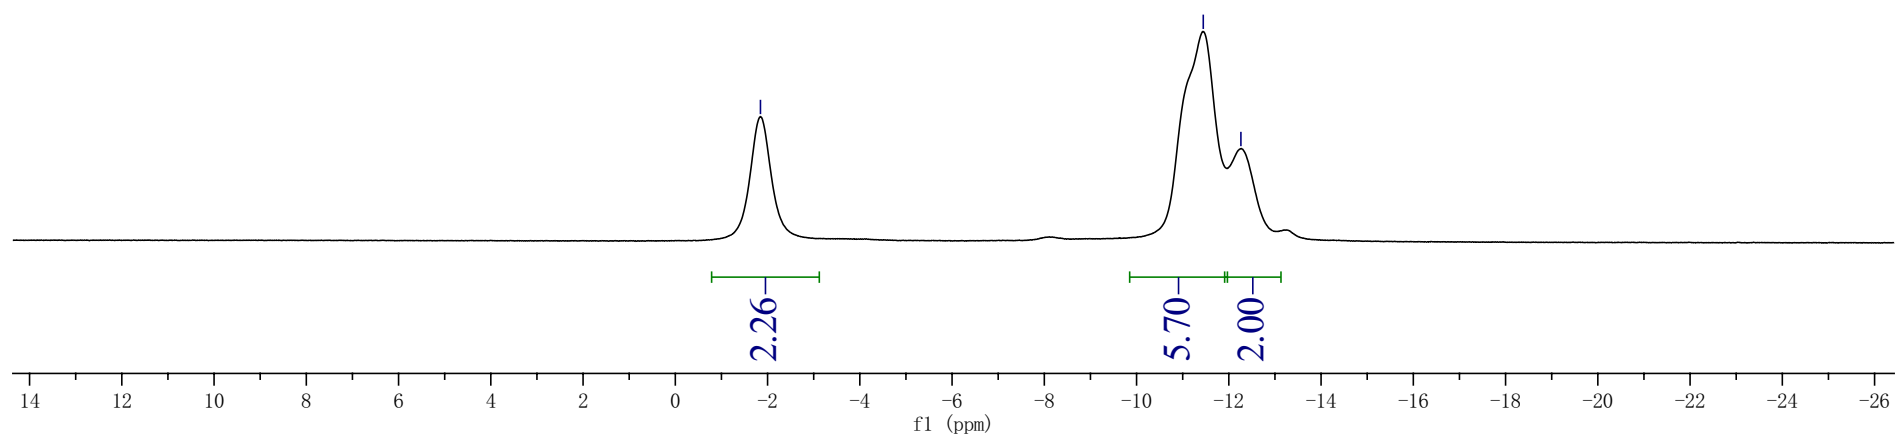

Supplementary Figure 153.  $^{11}\text{B}\{^1\text{H}\}$  NMR Spectrum of 11a.

crf-6-11-B-coupling-CDCl3

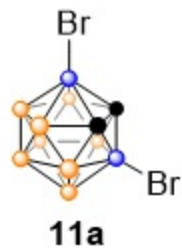

-1.240

-2.380

-10.917

-12.074

-12.827

| Parameter              | Value                                                                        |
|------------------------|------------------------------------------------------------------------------|
| Data File Name         | C:/Users/Administrator/Desktop/work/送样NMR/borabatom/GH/b-cr6-11-coupling/fid |
| Title                  | GH                                                                           |
| Comment                |                                                                              |
| Origin                 | UNMR Bruker Analytische Messtechnik GmbH                                     |
| Owner                  | root                                                                         |
| Site                   |                                                                              |
| Spectrometer           | dx400                                                                        |
| Author                 |                                                                              |
| Solvent                | DMSO                                                                         |
| Temperature            | 300.0                                                                        |
| Pulse Sequence         | zing1gy                                                                      |
| Number of Scans        | 400                                                                          |
| Receiver Gain          | 32                                                                           |
| Relaxation Delay       | 0.0000                                                                       |
| Pulse Width            | 13.4000                                                                      |
| Acquisition Time       | 0.4800                                                                       |
| Acquisition Date       | 2015-08-17 20:04:03                                                          |
| Modification Date      | 2015-08-17 16:04:00                                                          |
| Spectrometer Frequency | 128.38                                                                       |
| Spectral Width         | 3346.5                                                                       |
| Lowest Frequency       | -11800.2                                                                     |
| Nucleus                | 11B                                                                          |
| Acquired Size          | 16384                                                                        |
| Spectral Size          | 3268                                                                         |

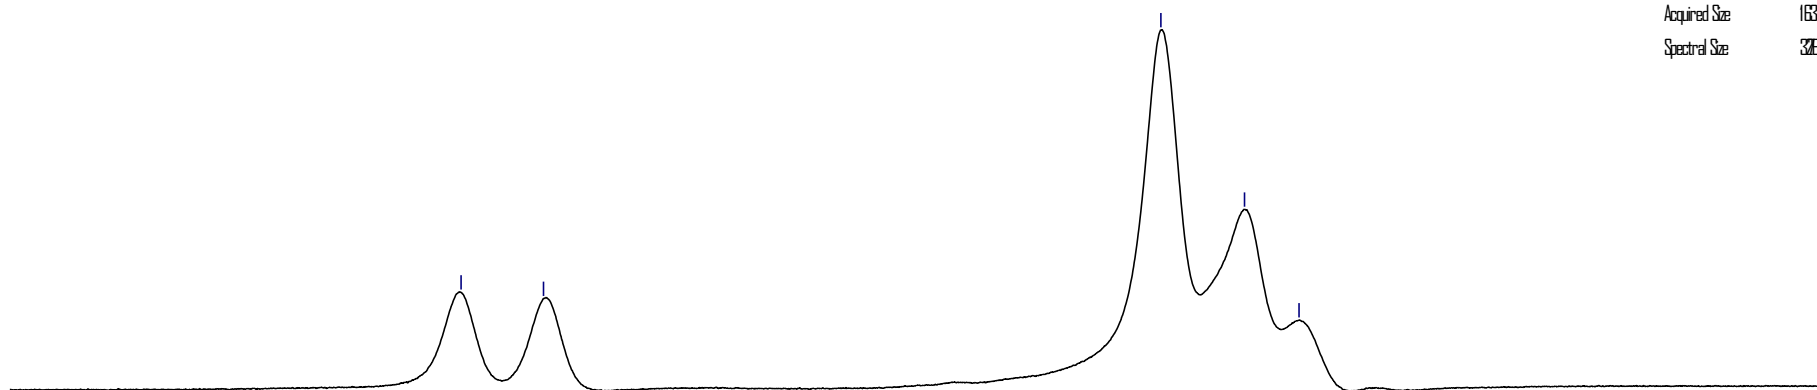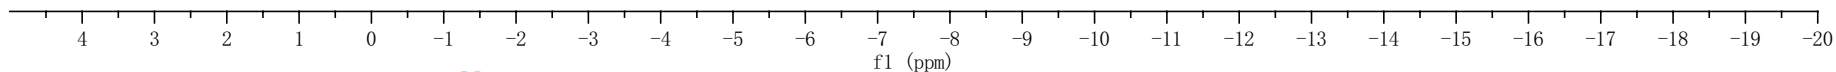

Supplementary Figure 154. <sup>11</sup>B NMR Spectrum of 11a.

crf-6-6-H-CDCl3

7.260

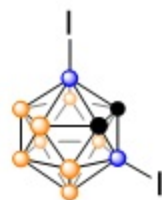

11b

4.126

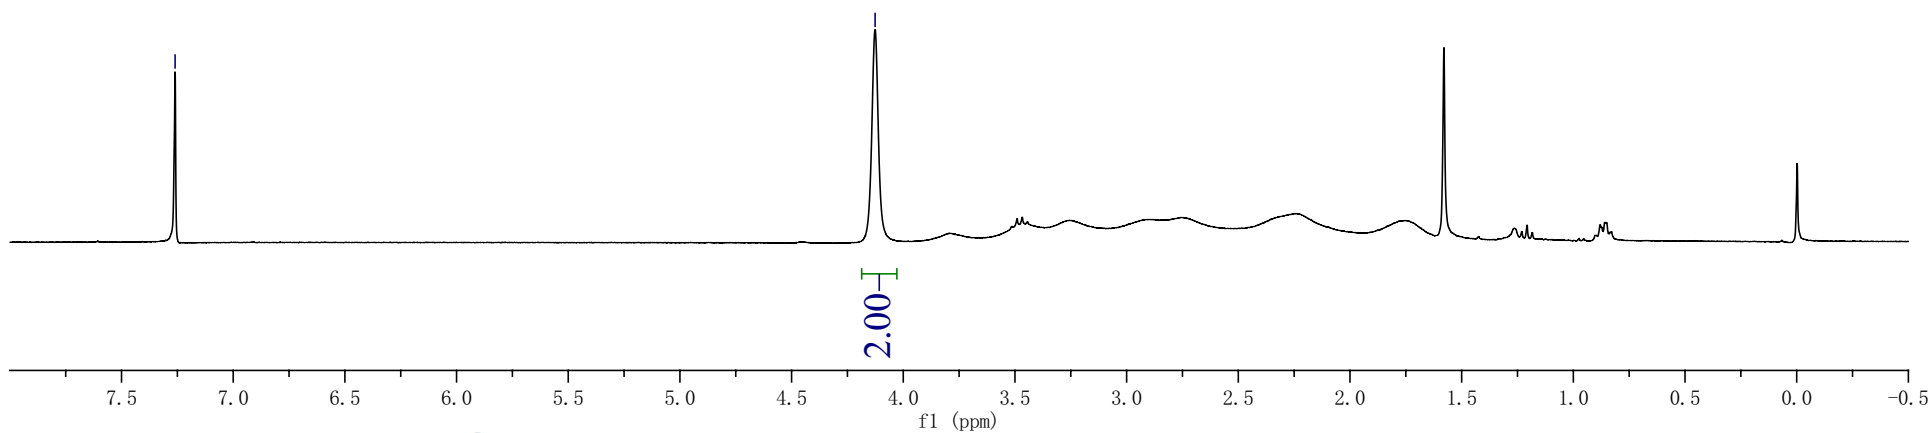

| Parameter              | Value               |
|------------------------|---------------------|
| Title                  | crf6-6H             |
| Comment                |                     |
| Origin                 | Varian              |
| Owner                  |                     |
| Site                   |                     |
| Spectrometer           | mercury             |
| Author                 | onc                 |
| Solvent                | CDCl3               |
| Temperature            | 29.0                |
| Pulse Sequence         | sZgU                |
| Number of Scans        | 8                   |
| Receiver Gain          | 28                  |
| Relaxation Delay       | 1.0000              |
| Pulse Width            | 0.0000              |
| Acquisition Date       | 2015-09-08T12:13:35 |
| Spectrometer Frequency | 300.08              |
| Spectral Width         | 5494.5              |
| Lowest Frequency       | -708.9              |
| Nucleus                | 1H                  |
| Acquired Size          | 10970               |
| Spectral Size          | 3288                |

Supplementary Figure 155. <sup>1</sup>H NMR Spectrum of 11b.



crf-6-6-C-CDCl3

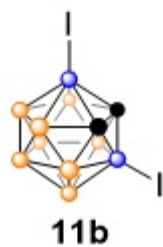

77.693  
77.269  
76.845  
64.444

| Parameter              | Value               |
|------------------------|---------------------|
| Title                  | crf66C              |
| Comment                | 13C OBSERVE         |
| Origin                 | Varian              |
| Owner                  |                     |
| Site                   |                     |
| Spectrometer           | mercury             |
| Author                 | omc                 |
| Solvent                | CDCl3               |
| Temperature            | 21.0                |
| Pulse Sequence         | sZul                |
| Number of Scans        | 52                  |
| Receiver Gain          | 32                  |
| Relaxation Delay       | 1.0000              |
| Pulse Width            | 0.0000              |
| Acquisition Date       | 2015-09-05 12:16:47 |
| Spectrometer Frequency | 76.45               |
| Spectral Width         | 18897.0             |
| Lowest Frequency       | -162.8              |
| Nucleus                | 13C                 |
| Acquired Size          | 3006                |
| Spectral Size          | 65636               |

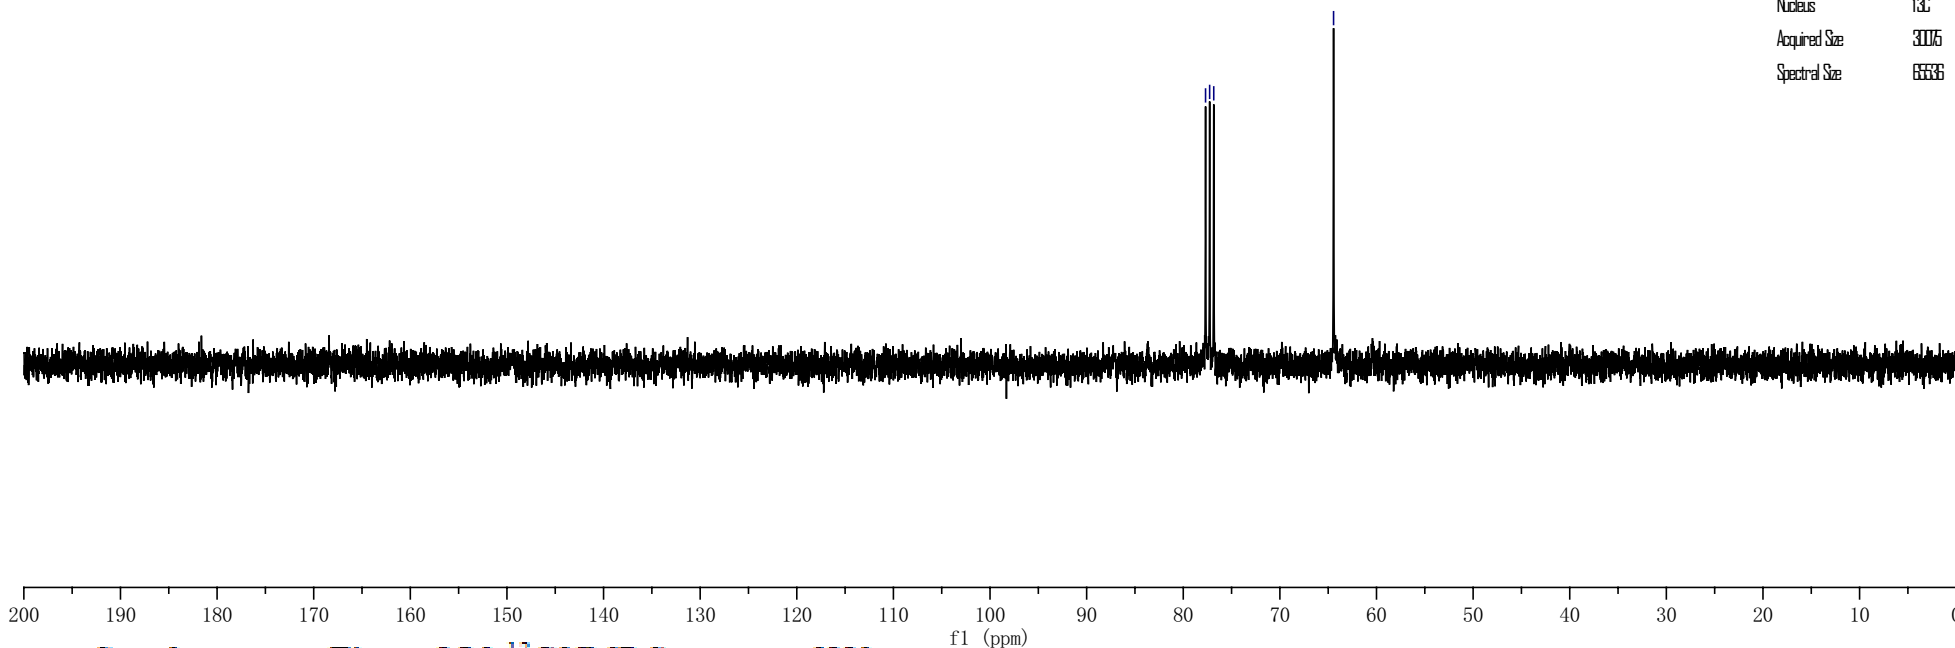

Supplementary Figure 156. <sup>13</sup>C NMR Spectrum of 11b.

crf-6-6-B-decoupling-CDC13

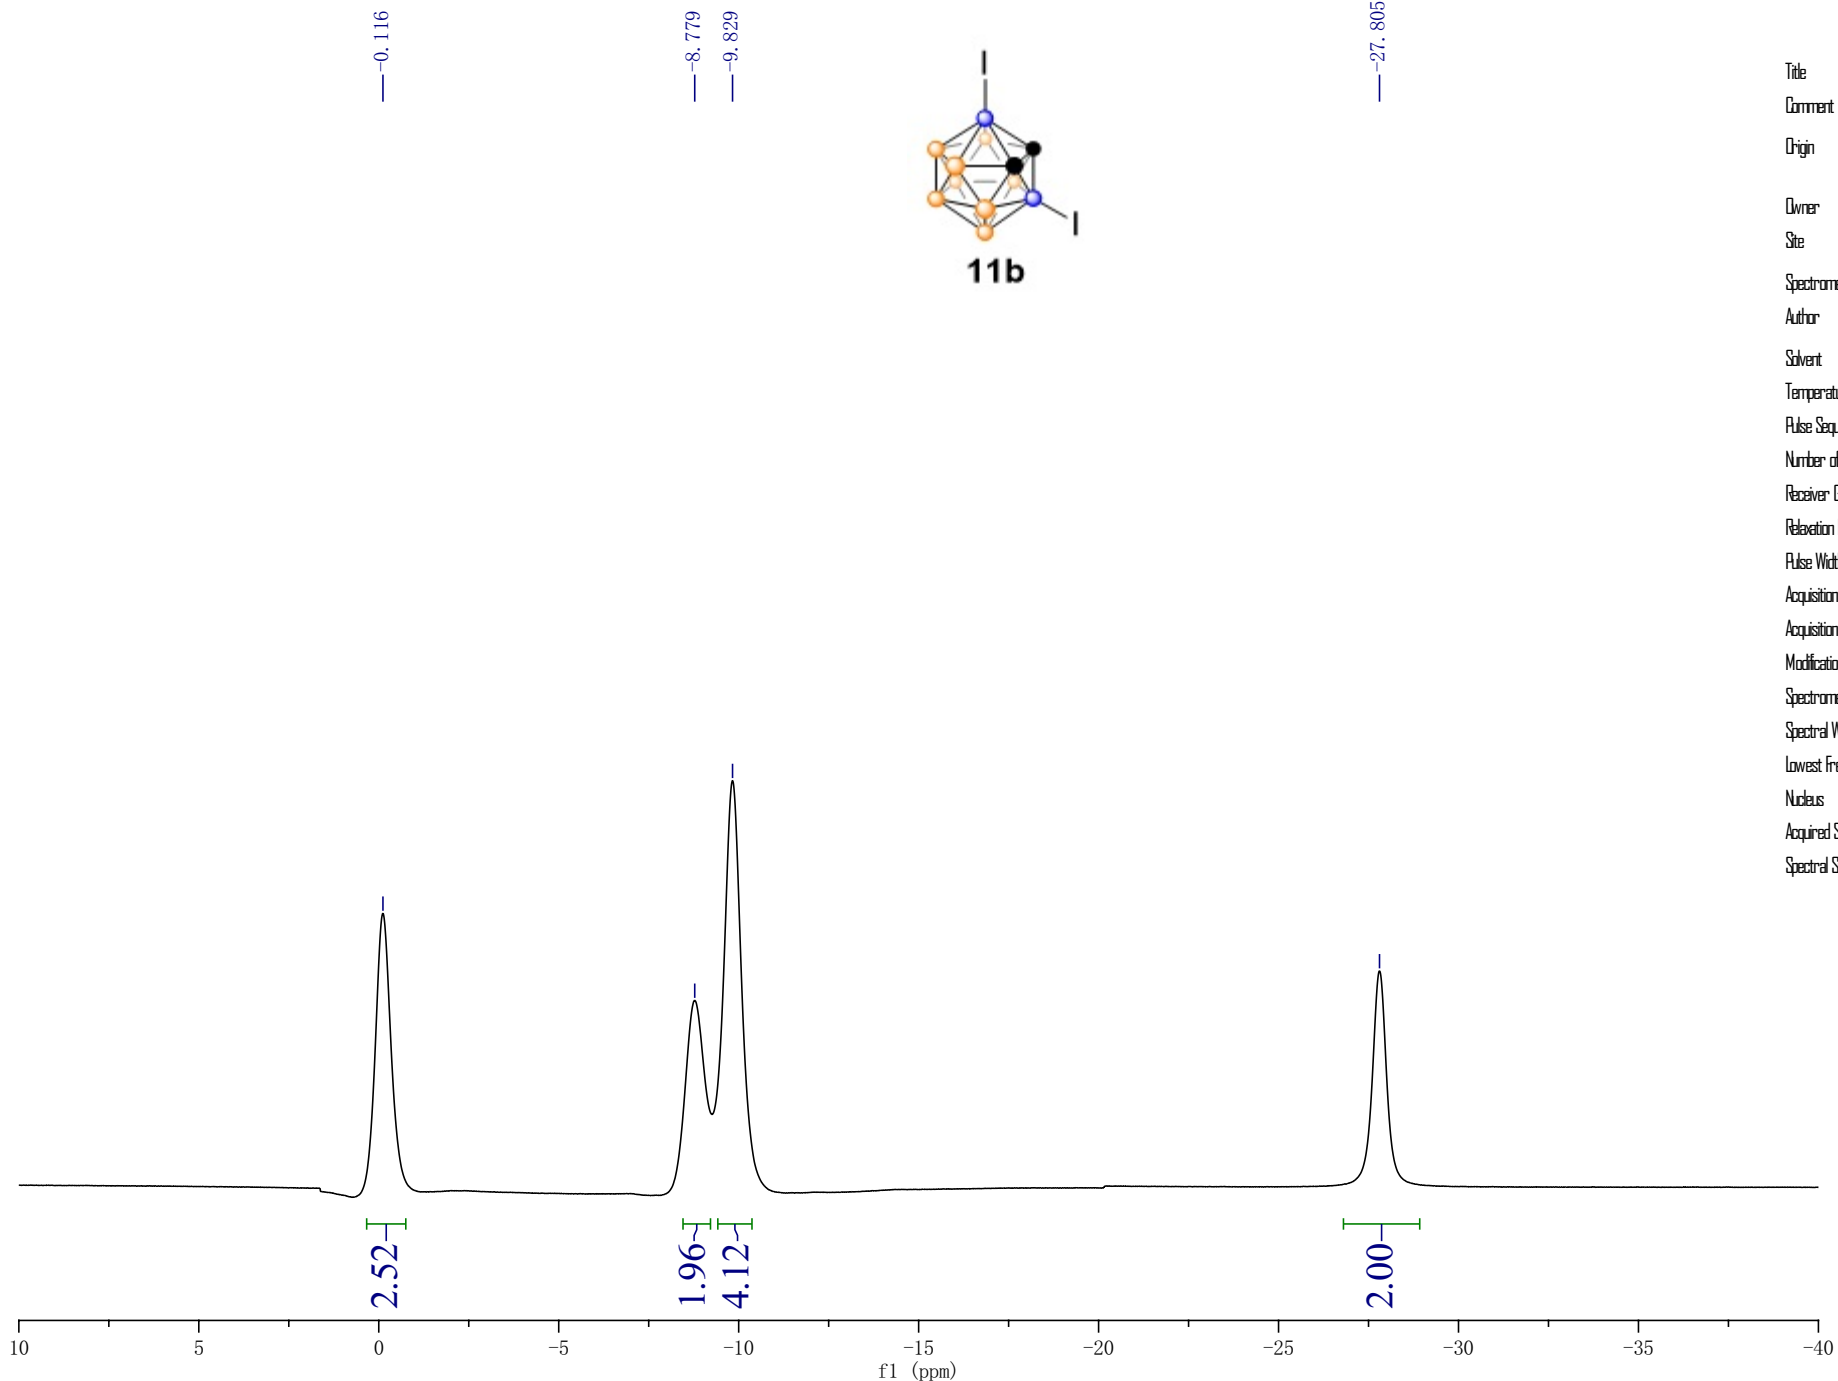

| Parameter              | Value                                                     |
|------------------------|-----------------------------------------------------------|
| Data File Name         | C:/Users/Administrator/Desktop/2135b-cr66/2135b-cr66/1/f1 |
| Title                  | 2135b-cr66                                                |
| Comment                |                                                           |
| Origin                 | UNMR, Bruker Analytische Messtechnik GmbH                 |
| Owner                  | root                                                      |
| Site                   |                                                           |
| Spectrometer           | dx400                                                     |
| Author                 |                                                           |
| Solvent                | DMSO                                                      |
| Temperature            | 300.0                                                     |
| Pulse Sequence         | zing1gy                                                   |
| Number of Scans        | 400                                                       |
| Receiver Gain          | 32                                                        |
| Relaxation Delay       | 0.0000                                                    |
| Pulse Width            | 13.4000                                                   |
| Acquisition Time       | 0.420                                                     |
| Acquisition Date       | 21-08-07 15:50:56                                         |
| Modification Date      | 21-08-07 10:56:15                                         |
| Spectrometer Frequency | 128.36                                                    |
| Spectral Width         | 3846.5                                                    |
| Lowest Frequency       | -1566.0                                                   |
| Nucleus                | 11B                                                       |
| Acquired Size          | 16384                                                     |
| Spectral Size          | 3268                                                      |

Supplementary Figure 157.  $^{11}\text{B}\{^1\text{H}\}$  NMR Spectrum of **11b**.

crf-6-6-B-coupling-CDC13

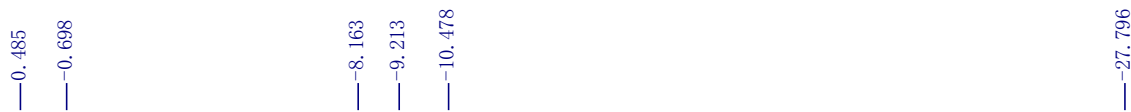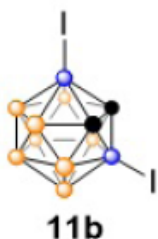

| Parameter              | Value                                                                     |
|------------------------|---------------------------------------------------------------------------|
| Data File Name         | C:/Users/Administrator/Desktop/21355b-crf6-6/21355b-crf6-6-coupling/1/fid |
| Title                  | 21355b-crf6-6-coupling                                                    |
| Comment                |                                                                           |
| Origin                 | UNMR Bruker Analytische Messtechnik GmbH                                  |
| Owner                  | root                                                                      |
| Site                   |                                                                           |
| Spectrometer           | dx400                                                                     |
| Author                 |                                                                           |
| Solvent                | DMSO                                                                      |
| Temperature            | 300.0                                                                     |
| Pulse Sequence         | aring1gy                                                                  |
| Number of Scans        | 400                                                                       |
| Receiver Gain          | 32                                                                        |
| Relaxation Delay       | 0.0000                                                                    |
| Pulse Width            | 13.4000                                                                   |
| Acquisition Time       | 0.480                                                                     |
| Acquisition Date       | 21-09-07 15:54:18                                                         |
| Modification Date      | 21-09-07 10:56:10                                                         |
| Spectrometer Frequency | 128.38                                                                    |
| Spectral Width         | 3946.5                                                                    |
| Lowest Frequency       | -11870.2                                                                  |
| Nucleus                | 11B                                                                       |
| Acquired Size          | 16384                                                                     |
| Spectral Size          | 3288                                                                      |

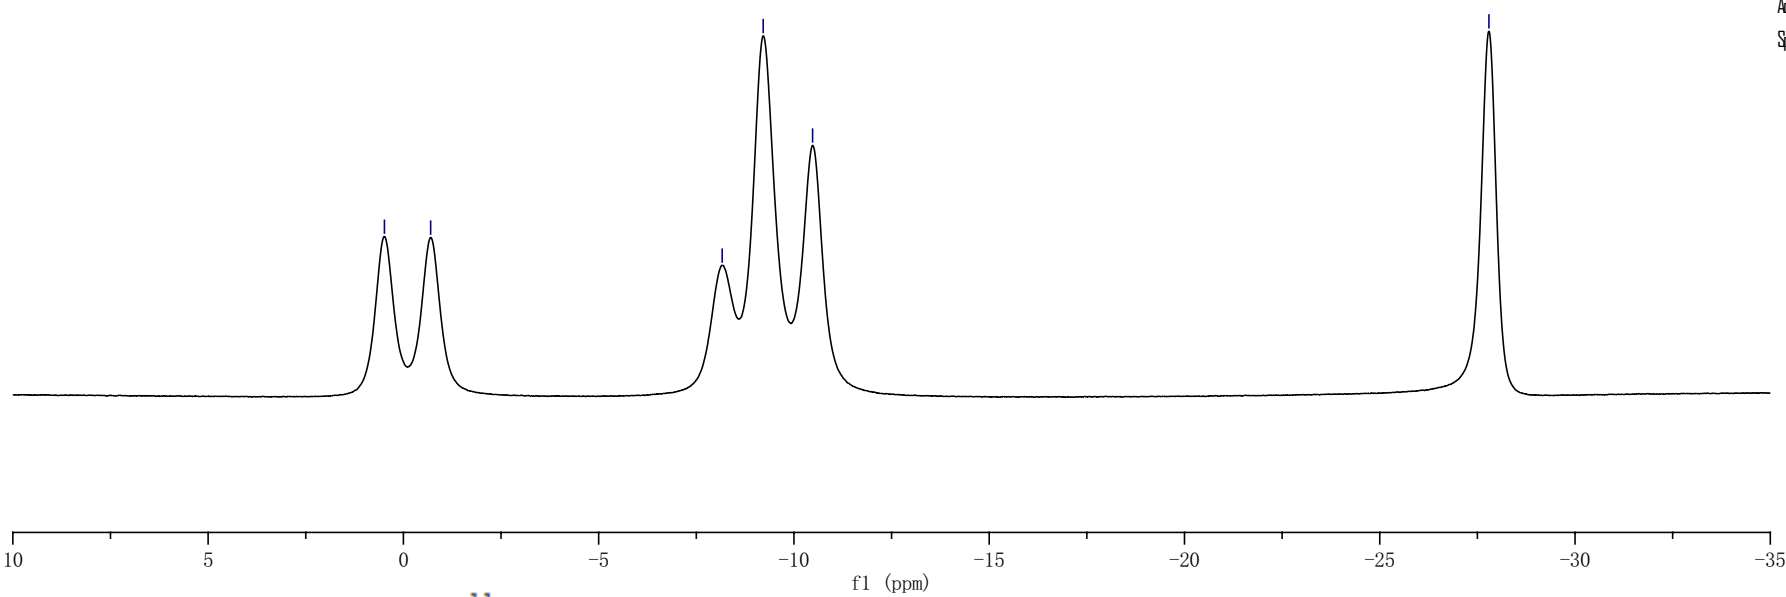

Supplementary Figure 158. <sup>11</sup>B NMR Spectrum of 11b.

crf-5-20-H-300M-CDCl3

| Parameter              | Value               |
|------------------------|---------------------|
| Title                  | crf5-20-300m205     |
| Comment                | 1                   |
| Origin                 | Varien              |
| Owner                  |                     |
| Site                   |                     |
| Spectrometer           | mercury             |
| Author                 |                     |
| Solvent                | CDCl3               |
| Temperature            | 3.0                 |
| Pulse Sequence         | s2ul                |
| Number of Scans        | 16                  |
| Receiver Gain          | 26                  |
| Relaxation Delay       | 1.0000              |
| Pulse Width            | 0.0000              |
| Acquisition Date       | 1999-11-13 16:21:28 |
| Spectrometer Frequency | 300.04              |
| Spectral Width         | 4803.1              |
| Lowest Frequency       | -599.8              |
| Nucleus                | 1H                  |
| Acquired Size          | 5592                |
| Spectral Size          | 3268                |

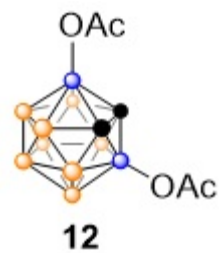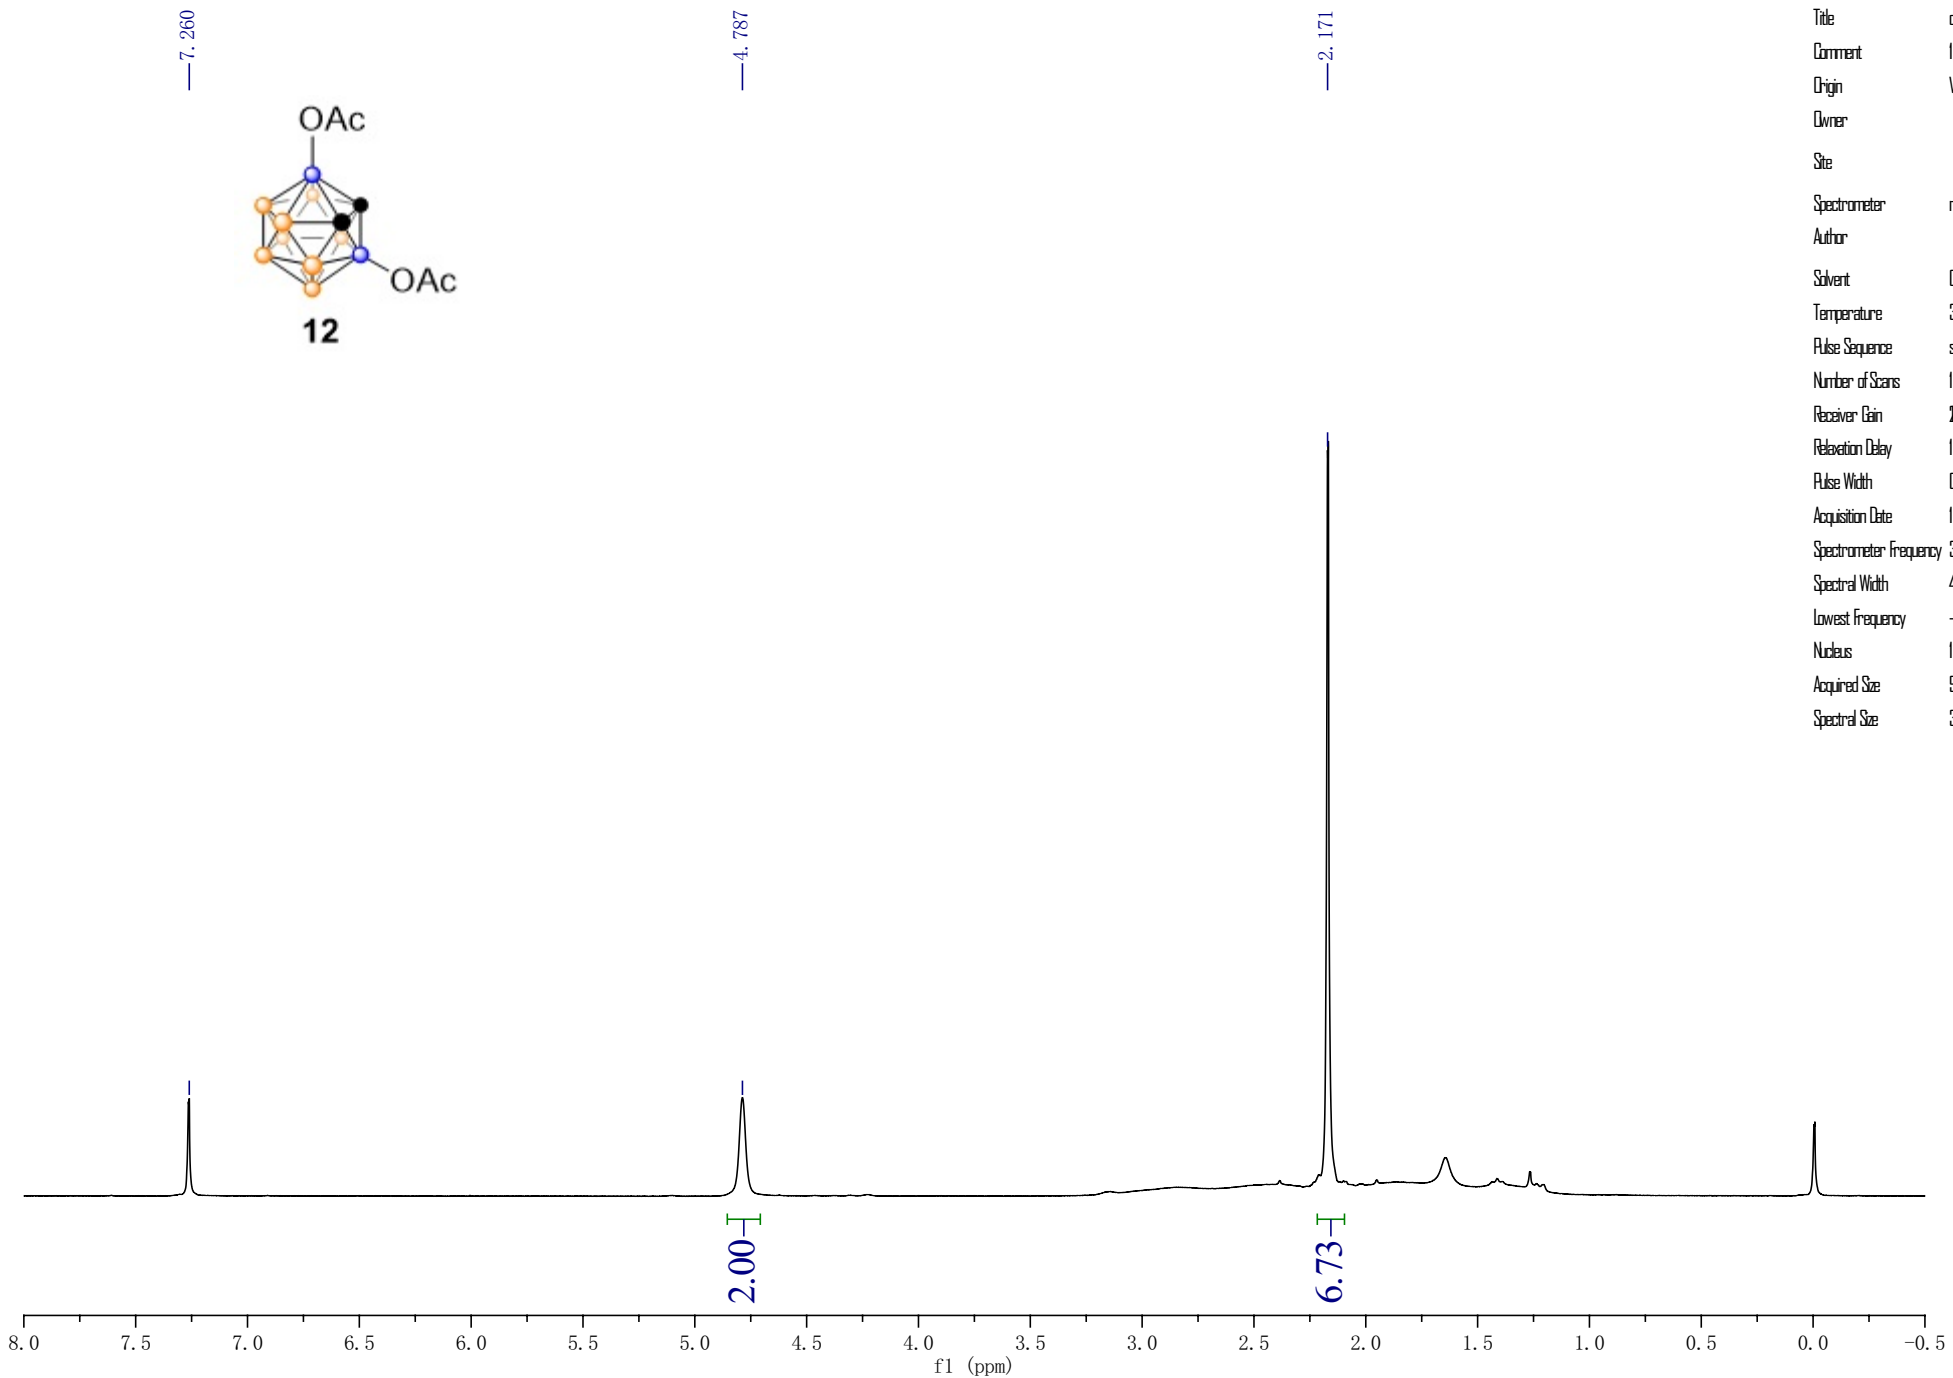

Supplementary Figure 159. <sup>1</sup>H NMR Spectrum of 12.

crf-5-20-C-400M-CDC13

169.82

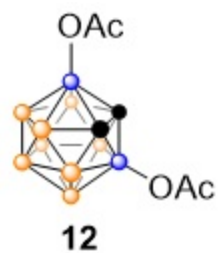

77.320  
77.003  
76.684

55.552

22.360

| Parameter              | Value               |
|------------------------|---------------------|
| Title                  | crf-5-20-C-400M     |
| Comment                | Std carbon          |
| Orign                  | Varian              |
| Owner                  |                     |
| Site                   |                     |
| Spectrometer           | vnmrs               |
| Author                 | omel                |
| Solvent                | cdcl3               |
| Temperature            | 21.0                |
| Pulse Sequence         | sgpu                |
| Number of Scans        | 112                 |
| Receiver Gain          | 60                  |
| Relaxation Delay       | 1.0000              |
| Pulse Width            | 0.0000              |
| Acquisition Date       | 2015-05-30T12:37:28 |
| Spectrometer Frequency | 100.60              |
| Spectral Width         | 2658.8              |
| Lowest Frequency       | -1688.3             |
| Nucleus                | 13C                 |
| Acquired Size          | 3185                |
| Spectral Size          | 65536               |

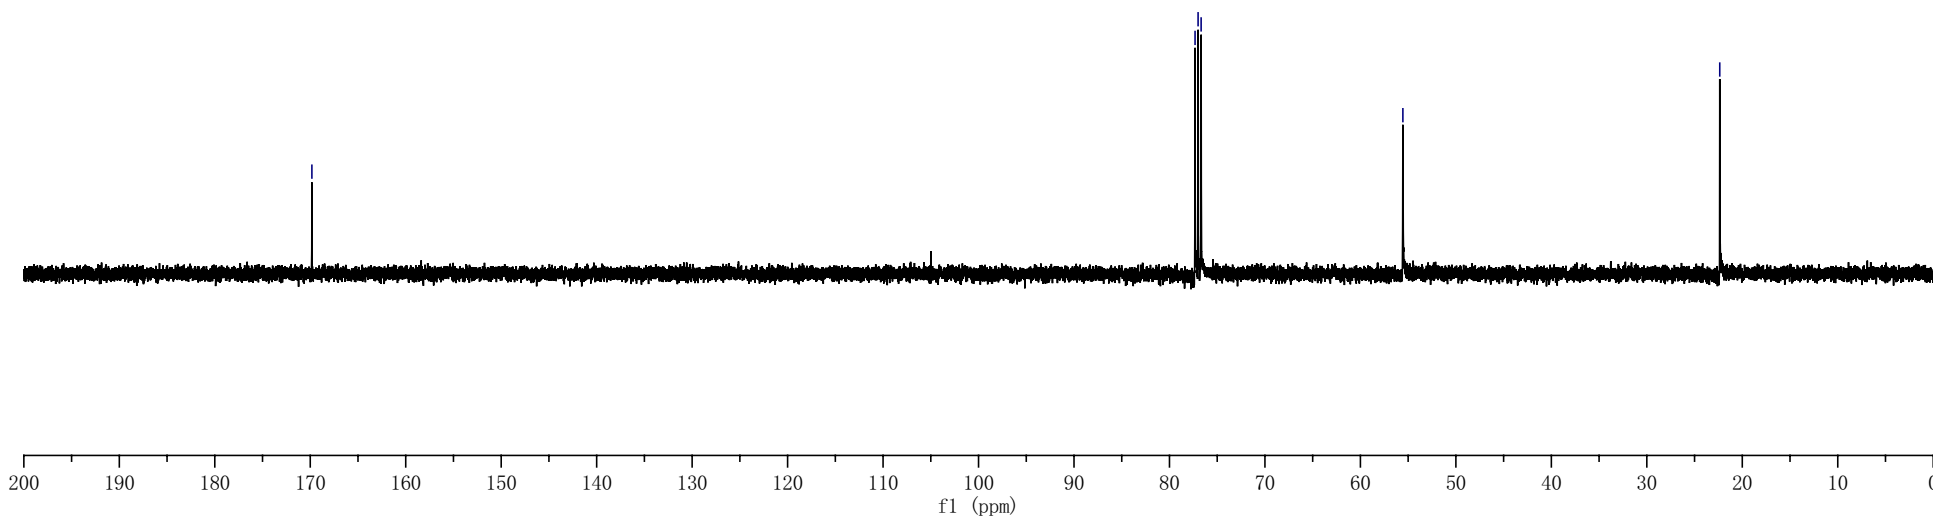

Supplementary Figure 160. <sup>13</sup>C NMR Spectrum of 12.

crf-5-20-B-decoupling-CDCl3

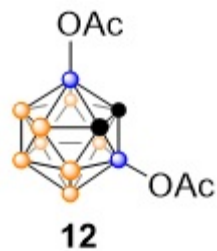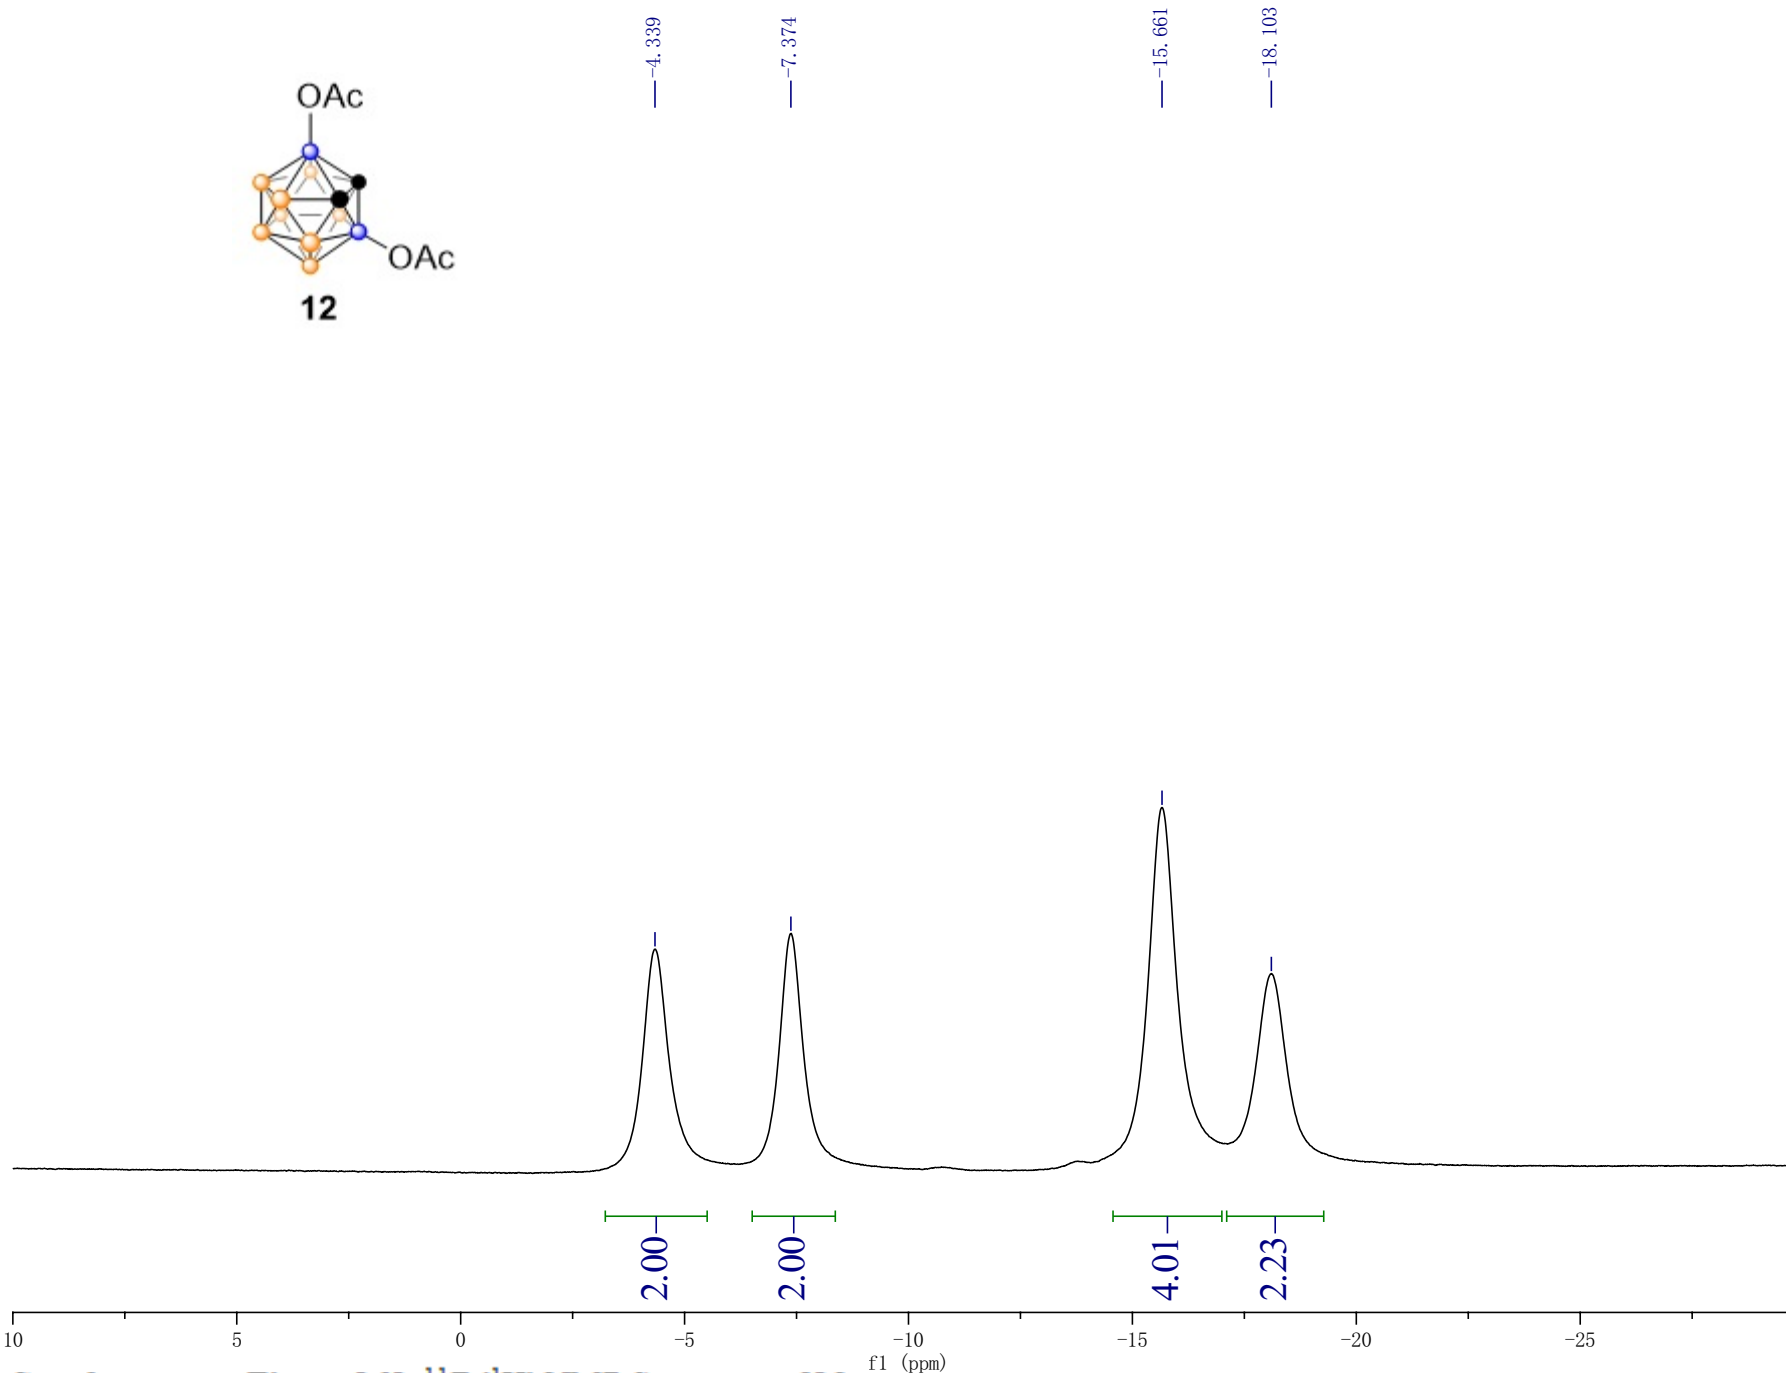

| Parameter              | Value                                                                 |
|------------------------|-----------------------------------------------------------------------|
| Data File Name         | C:/Users/Administrator/Desktop/work/送样NMR/borolatom/5-20/b-cr5-20.fid |
| Title                  | 5-20                                                                  |
| Comment                |                                                                       |
| Origin                 | UNMR Bruker Analytische Messtechnik GmbH                              |
| Owner                  | root                                                                  |
| Site                   |                                                                       |
| Spectrometer           | dx400                                                                 |
| Author                 |                                                                       |
| Solvent                | DMSO                                                                  |
| Temperature            | 300.0                                                                 |
| Pulse Sequence         | aring1g                                                               |
| Number of Scans        | 439                                                                   |
| Receiver Gain          | 32                                                                    |
| Relaxation Delay       | 0.0000                                                                |
| Pulse Width            | 13.4000                                                               |
| Acquisition Time       | 0.355                                                                 |
| Acquisition Date       | 2015-07-07 13:21:34                                                   |
| Modification Date      | 2015-07-07 13:24:00                                                   |
| Spectrometer Frequency | 128.38                                                                |
| Spectral Width         | 51221                                                                 |
| Lowest Frequency       | -17321.9                                                              |
| Nucleus                | 11B                                                                   |
| Acquired Size          | 16384                                                                 |
| Spectral Size          | 3273                                                                  |

Supplementary Figure 161.  $^{11}\text{B}\{^1\text{H}\}$  NMR Spectrum of **12**.

crf-5-20-B-coupling-CDC13

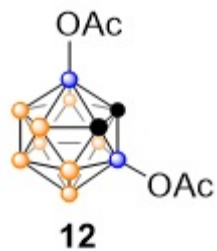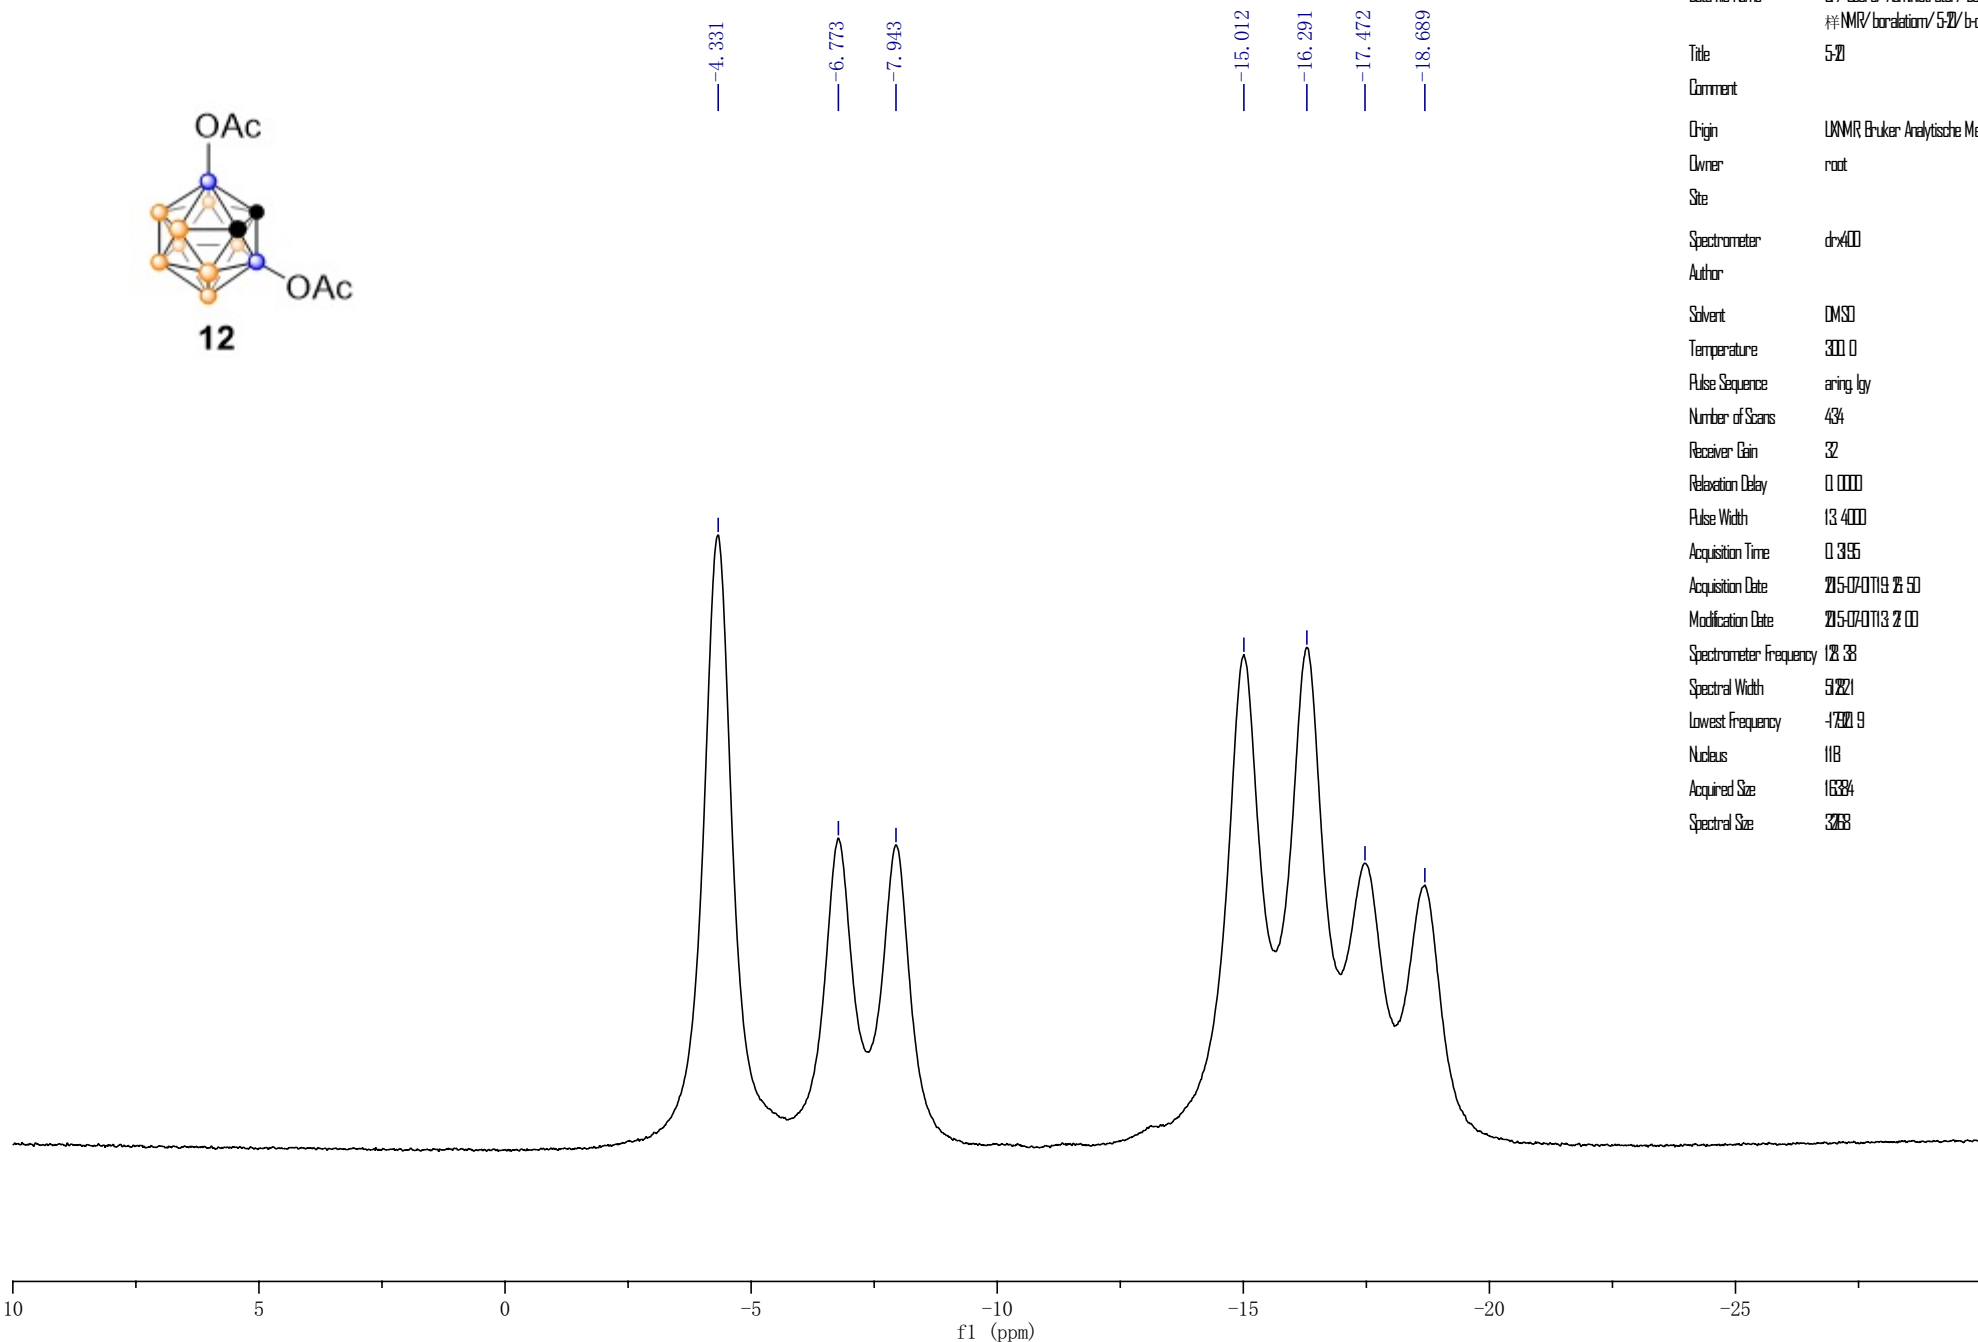

| Parameter              | Value                                                                             |
|------------------------|-----------------------------------------------------------------------------------|
| Data file Name         | C:/Users/Administrator/Desktop/work/送<br>样NMR/borolab/5-20/b-cr-5-20-coupling/fid |
| Title                  | 5-20                                                                              |
| Comment                |                                                                                   |
| Origin                 | UNMR Bruker Analytische Messtechnik GmbH                                          |
| Owner                  | root                                                                              |
| Site                   |                                                                                   |
| Spectrometer           | drx400                                                                            |
| Author                 |                                                                                   |
| Solvent                | DMSO                                                                              |
| Temperature            | 300.0                                                                             |
| Pulse Sequence         | aring1gy                                                                          |
| Number of Scans        | 434                                                                               |
| Receiver Gain          | 32                                                                                |
| Relaxation Delay       | 0.0000                                                                            |
| Pulse Width            | 13.4000                                                                           |
| Acquisition Time       | 0.395                                                                             |
| Acquisition Date       | 2015-07-01 19:28:50                                                               |
| Modification Date      | 2015-07-01 19:28:00                                                               |
| Spectrometer Frequency | 128.38                                                                            |
| Spectral Width         | 51221                                                                             |
| Lowest Frequency       | -17320.9                                                                          |
| Nucleus                | 11B                                                                               |
| Acquired Size          | 16334                                                                             |
| Spectral Size          | 3263                                                                              |

crf-5-16-H-400M-CDC13

7.260

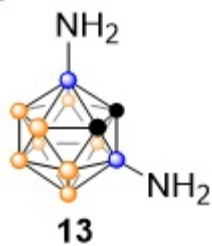

3.583

1.447

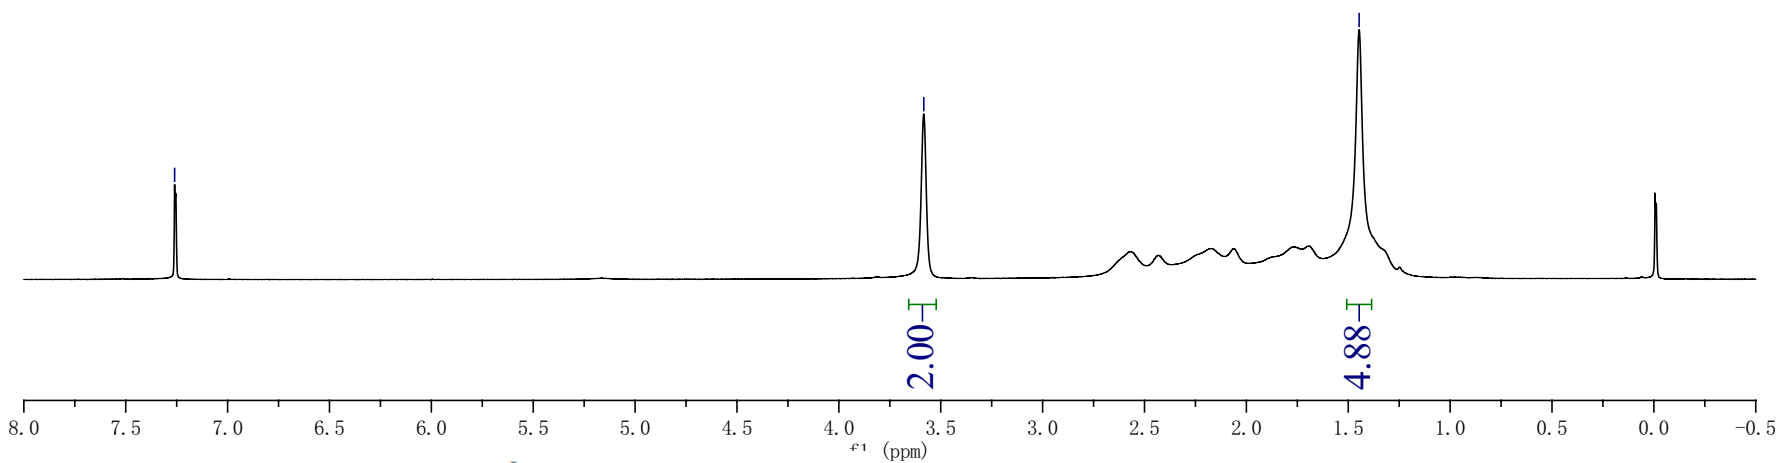

| Parameter              | Value               |
|------------------------|---------------------|
| Title                  | crf516H400M         |
| Comment                |                     |
| Origin                 | Varian              |
| Owner                  |                     |
| Site                   |                     |
| Spectrometer           | nmrs                |
| Author                 |                     |
| Solvent                | CDCl3               |
| Temperature            | 19.0                |
| Pulse Sequence         | sgpl                |
| Number of Scans        | 8                   |
| Receiver Gain          | 36                  |
| Relaxation Delay       | 1.000               |
| Pulse Width            | 0.000               |
| Acquisition Date       | 2015-05-27 09:18:35 |
| Spectrometer Frequency | 399.72              |
| Spectral Width         | 6400.3              |
| Lowest Frequency       | -808.0              |
| Nucleus                | 1H                  |
| Acquired Size          | 1928                |
| Spectral Size          | 65535               |

Supplementary Figure 163. <sup>1</sup>H NMR Spectrum of 13.



crf-5-16-C-500M-CDC13

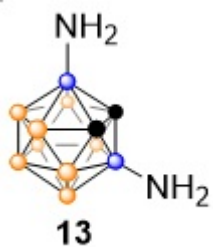

77.303  
77.048  
76.795

62.353

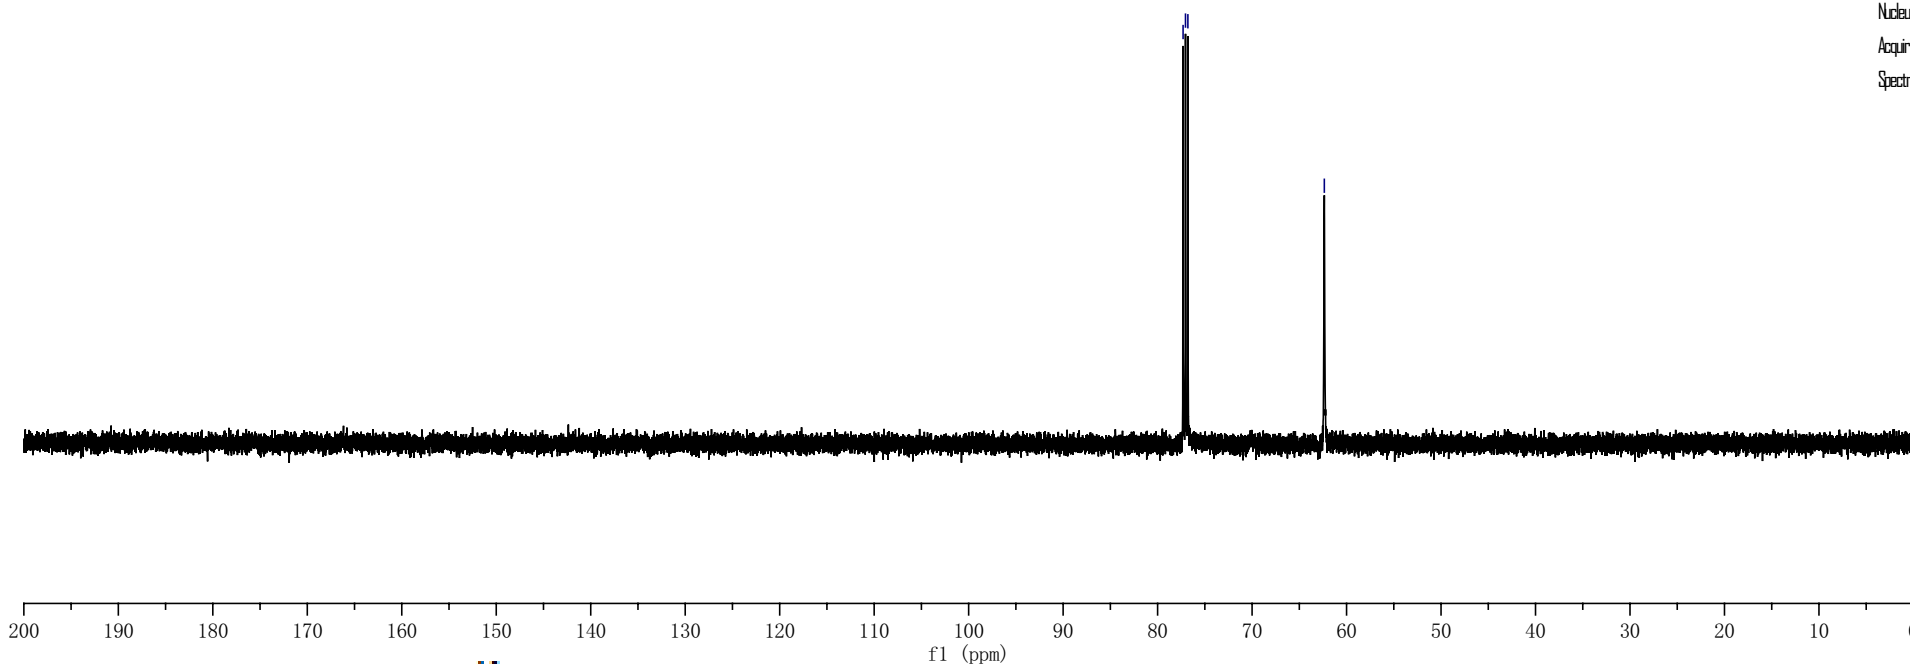

| Parameter              | Value               |
|------------------------|---------------------|
| Title                  | 21333byjc           |
| Comment                | 21333byjc           |
| Origin                 | Varian              |
| Owner                  |                     |
| Site                   |                     |
| Spectrometer           | vnmrs               |
| Author                 |                     |
| Solvent                | cdcl3               |
| Temperature            | 25.0                |
| Pulse Sequence         | sgpd                |
| Number of Scans        | 128                 |
| Receiver Gain          | 30                  |
| Relaxation Delay       | 1.0000              |
| Pulse Width            | 0.0000              |
| Acquisition Date       | 2015-06-20 12:43:22 |
| Spectrometer Frequency | 125.72              |
| Spectral Width         | 3120.0              |
| Lowest Frequency       | -1737.9             |
| Nucleus                | 13C                 |
| Acquired Size          | 3268                |
| Spectral Size          | 65536               |

Supplementary Figure 164. <sup>13</sup>C NMR Spectrum of 13.

crf-5-16-B-decoupling-500M-CDCI3

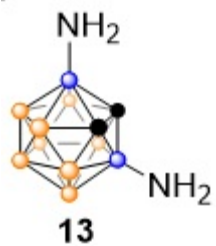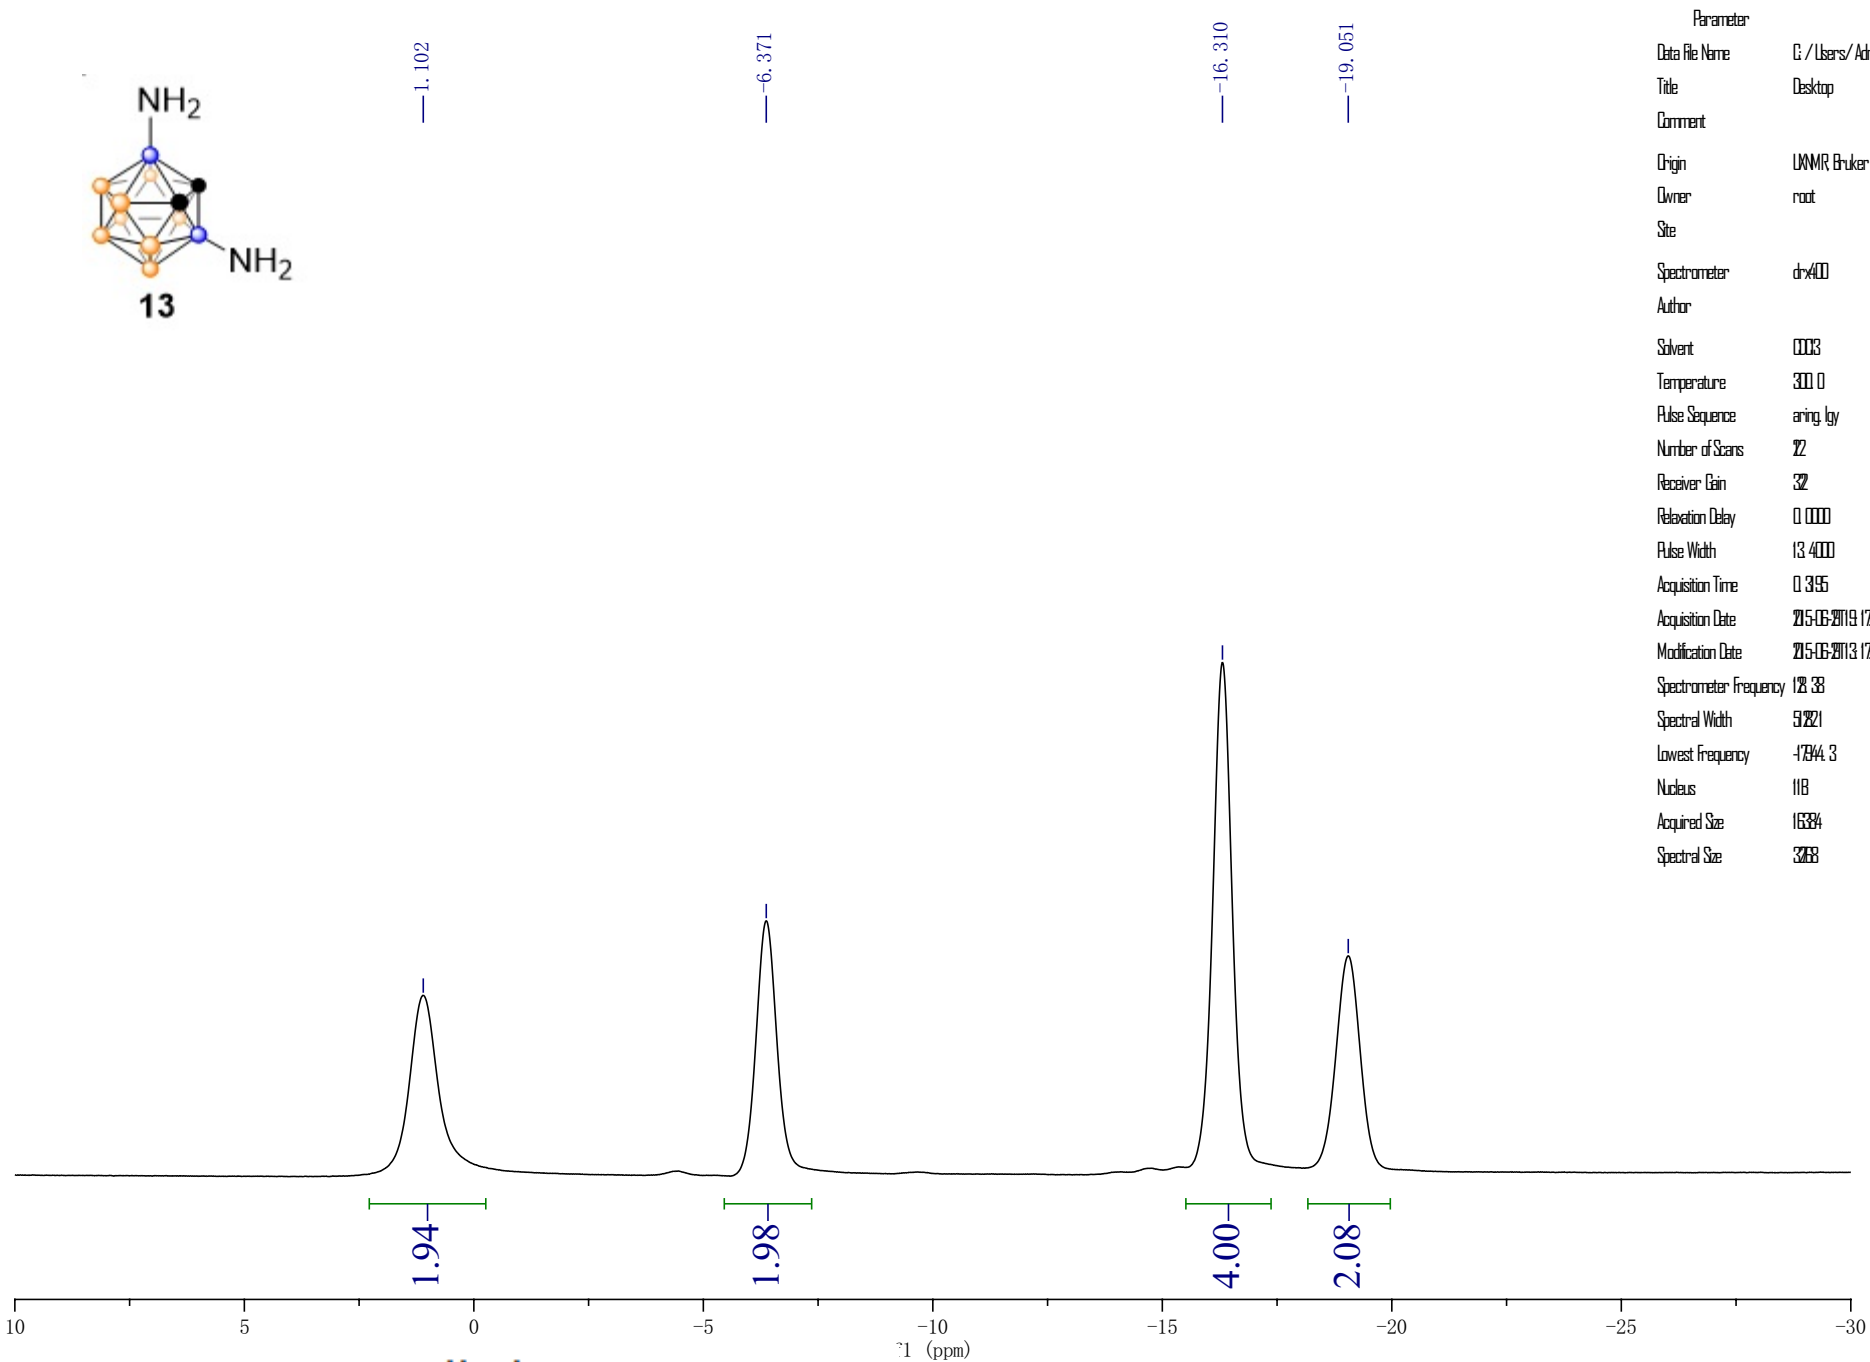

| Parameter              | Value                                       |
|------------------------|---------------------------------------------|
| Data File Name         | C:/Users/Administrator/Desktop/b-cr-f5-9/td |
| Title                  | Desktop                                     |
| Comment                |                                             |
| Origin                 | UNMR Bruker Analytische Messtechnik GmbH    |
| Owner                  | root                                        |
| Site                   |                                             |
| Spectrometer           | dx400                                       |
| Author                 |                                             |
| Solvent                | CDCl3                                       |
| Temperature            | 300.0                                       |
| Pulse Sequence         | aring,lg                                    |
| Number of Scans        | 12                                          |
| Receiver Gain          | 32                                          |
| Relaxation Delay       | 0.0000                                      |
| Pulse Width            | 13.4000                                     |
| Acquisition Time       | 0.395                                       |
| Acquisition Date       | 2015-08-20 13:17:2                          |
| Modification Date      | 2015-08-20 13:17:00                         |
| Spectrometer Frequency | 128.38                                      |
| Spectral Width         | 5.221                                       |
| Lowest Frequency       | 4784.3                                      |
| Nucleus                | 11B                                         |
| Acquired Size          | 16394                                       |
| Spectral Size          | 3288                                        |

Supplementary Figure 165.  $^{11}\text{B}\{^1\text{H}\}$  NMR Spectrum of **13**.

crf-5-16-B-coupling-500M-CDC13

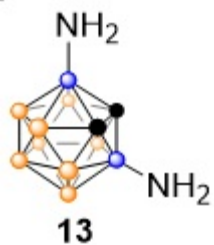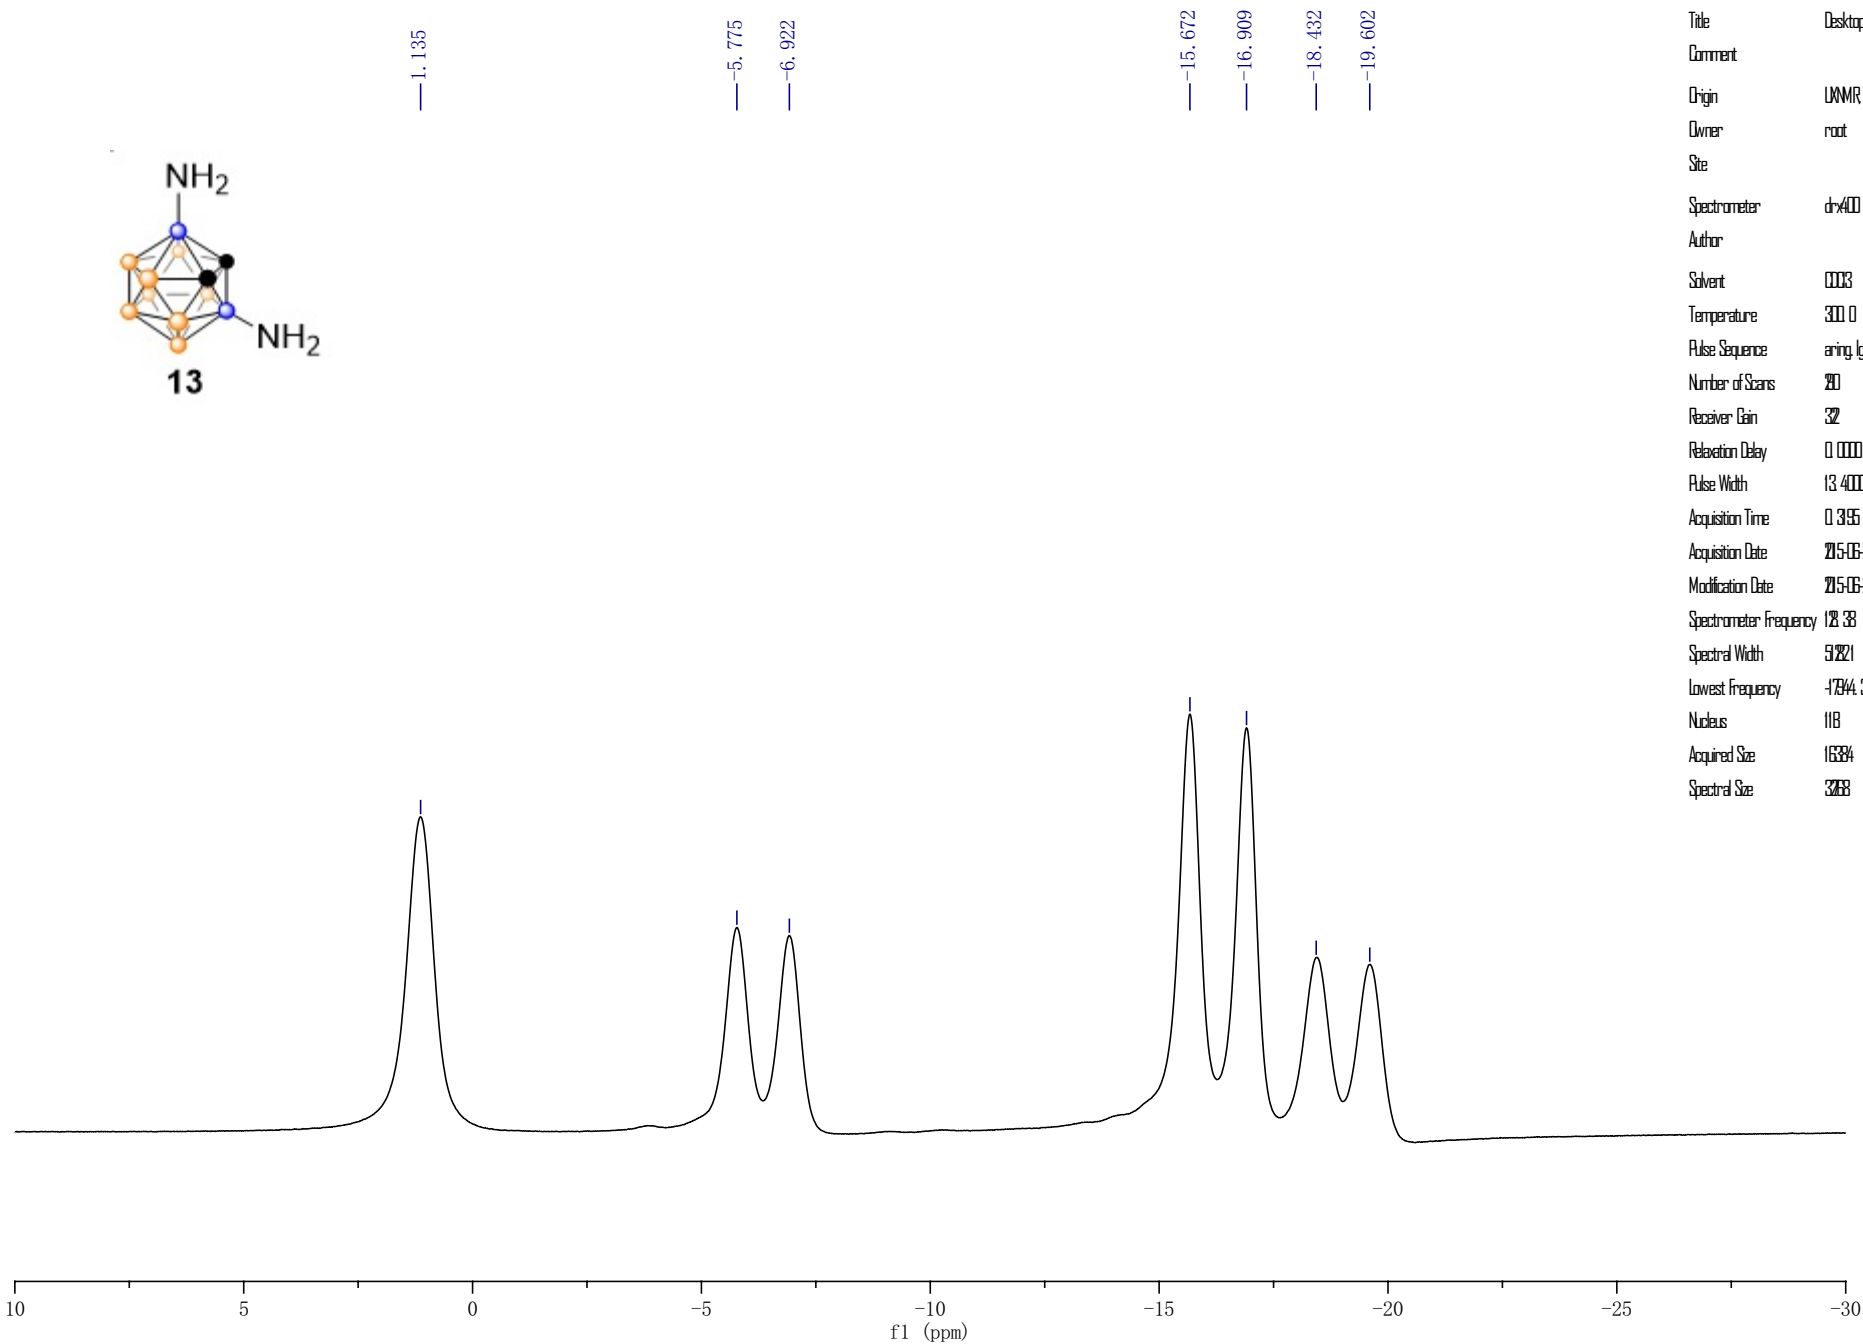

| Parameter              | Value                                                |
|------------------------|------------------------------------------------------|
| Data File Name         | C:/Users/Administrator/Desktop/b-cr-5-2-coupling/fid |
| Title                  | Desktop                                              |
| Comment                |                                                      |
| Origin                 | UNMR Bruker Analytische Messtechnik GmbH             |
| Owner                  | root                                                 |
| Site                   |                                                      |
| Spectrometer           | dx400                                                |
| Author                 |                                                      |
| Solvent                | CDCl3                                                |
| Temperature            | 300.0                                                |
| Pulse Sequence         | aring1gy                                             |
| Number of Scans        | 20                                                   |
| Receiver Gain          | 32                                                   |
| Relaxation Delay       | 0.0000                                               |
| Pulse Width            | 13.4000                                              |
| Acquisition Time       | 0.3155                                               |
| Acquisition Date       | 2015-05-29 13:18:28                                  |
| Modification Date      | 2015-05-29 13:19:00                                  |
| Spectrometer Frequency | 128.38                                               |
| Spectral Width         | 5.221                                                |
| Lowest Frequency       | -17.844.3                                            |
| Nucleus                | 11B                                                  |
| Acquired Size          | 16384                                                |
| Spectral Size          | 3288                                                 |

Supplementary Figure 166. <sup>11</sup>B NMR Spectrum of 13.

crf-4-65-H-CDCl3

7.260

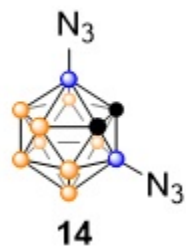

3.665

| Parameter              | Value               |
|------------------------|---------------------|
| Title                  | crf-4-65-H-CDCl3    |
| Comment                | STANDARD 1H CDSERVE |
| Origin                 | Varian              |
| Owner                  |                     |
| Site                   |                     |
| Spectrometer           | mercury             |
| Author                 | omc                 |
| Solvent                | CDCl3               |
| Temperature            | 21.0                |
| Pulse Sequence         | sZul                |
| Number of Scans        | 8                   |
| Receiver Gain          | 28                  |
| Relaxation Delay       | 1.0000              |
| Pulse Width            | 0.0000              |
| Acquisition Date       | 2015-06-15 16:37:00 |
| Spectrometer Frequency | 300.03              |
| Spectral Width         | 5494.5              |
| Lowest Frequency       | -71.9               |
| Nucleus                | 1H                  |
| Acquired Size          | 10016               |
| Spectral Size          | 3288                |

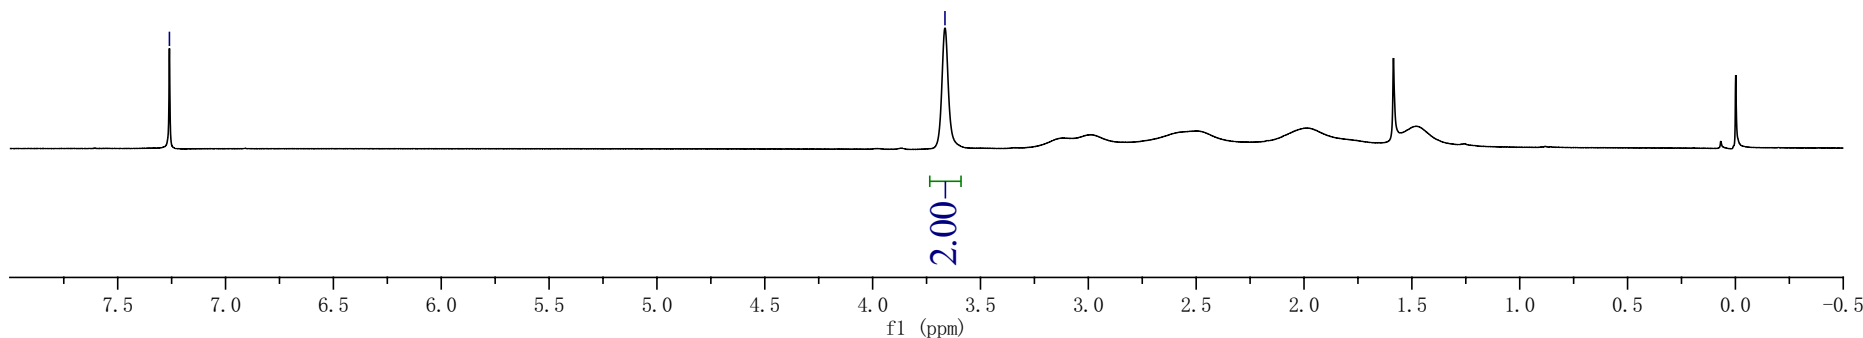

Supplementary Figure 167. <sup>1</sup>H NMR Spectrum of 14.

crf-4-65-C-CDC13

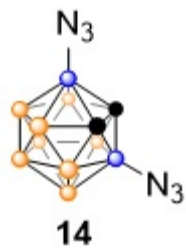

77.702  
77.279  
76.855

57.366

| Parameter              | Value               |
|------------------------|---------------------|
| Title                  | crf-4-65-C          |
| Comment                | 13C OBSERVE         |
| Origin                 | Varian              |
| Owner                  |                     |
| Site                   |                     |
| Spectrometer           | mercury             |
| Author                 | omc                 |
| Solvent                | CDCl3               |
| Temperature            | 29.0                |
| Pulse Sequence         | sZul                |
| Number of Scans        | 136                 |
| Receiver Gain          | 28                  |
| Relaxation Delay       | 1.0000              |
| Pulse Width            | 0.0000              |
| Acquisition Date       | 2015-08-15 17:12:51 |
| Spectrometer Frequency | 76.45               |
| Spectral Width         | 18887.0             |
| Lowest Frequency       | 462.8               |
| Nucleus                | 13C                 |
| Acquired Size          | 2955                |
| Spectral Size          | 65636               |

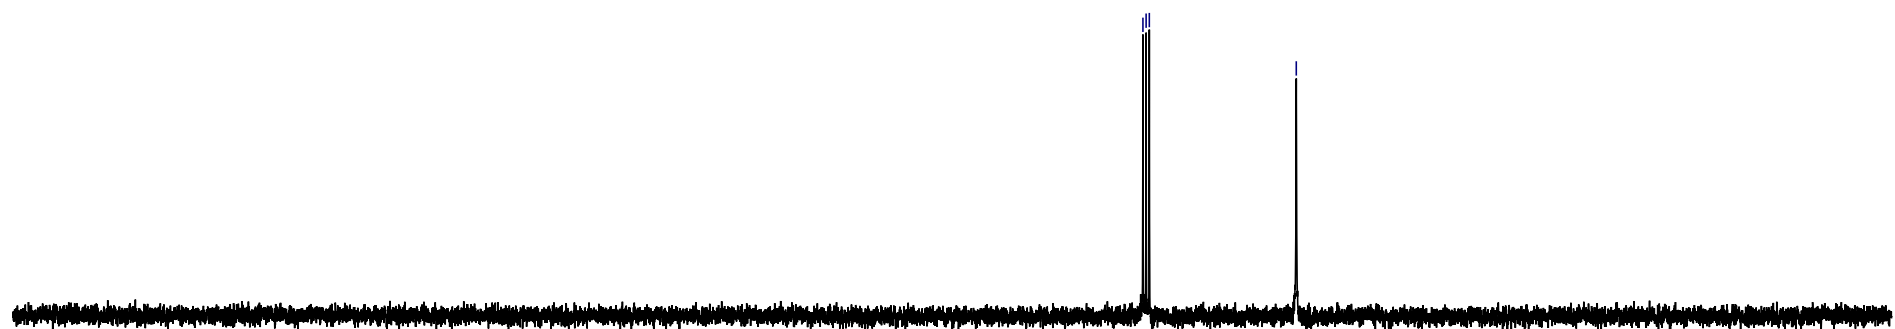

Supplementary Figure 168. <sup>13</sup>C NMR Spectrum of 14.

crf-4-65-B-decoupling-CDC13

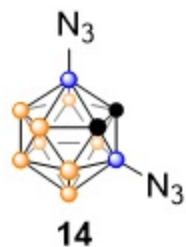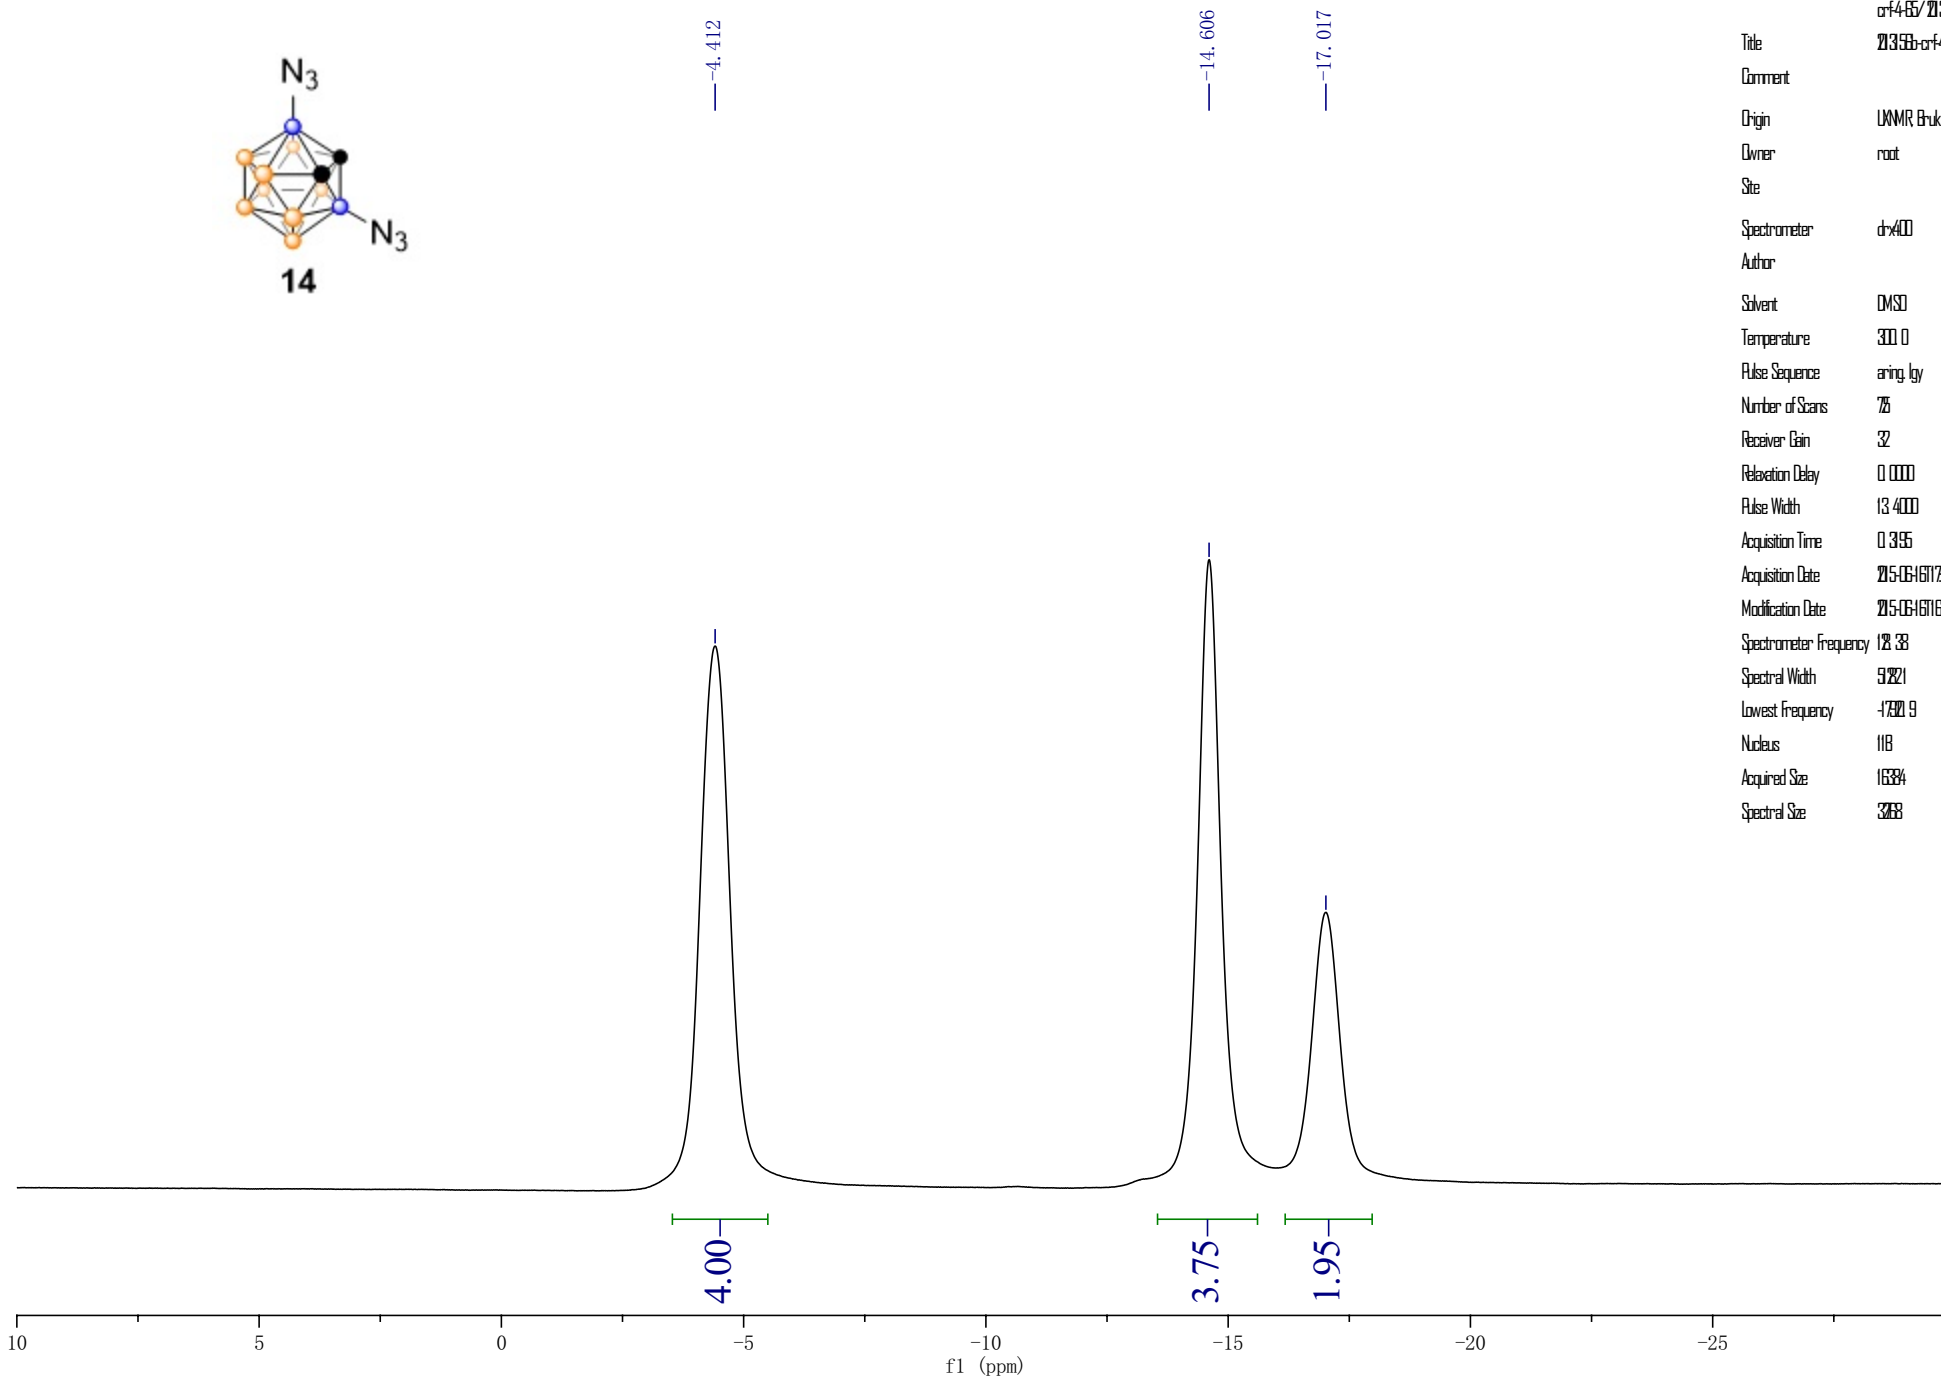

| Parameter              | Value                                                           |
|------------------------|-----------------------------------------------------------------|
| Data File Name         | G:/Users/Administrator/Desktop/20135B-cr4-65/20135B-cr4-65/1/f1 |
| Title                  | 20135B-cr4-65                                                   |
| Comment                |                                                                 |
| Origin                 | UNMR Bruker Analytische Messtechnik GmbH                        |
| Owner                  | root                                                            |
| Site                   |                                                                 |
| Spectrometer           | dr400                                                           |
| Author                 |                                                                 |
| Solvent                | DMSO                                                            |
| Temperature            | 300.0                                                           |
| Pulse Sequence         | ering_1gy                                                       |
| Number of Scans        | 78                                                              |
| Receiver Gain          | 32                                                              |
| Relaxation Delay       | 0.0000                                                          |
| Pulse Width            | 13.4000                                                         |
| Acquisition Time       | 0.355                                                           |
| Acquisition Date       | 2015-03-16 17:57:50                                             |
| Modification Date      | 2015-03-16 16:00:25                                             |
| Spectrometer Frequency | 128.38                                                          |
| Spectral Width         | 9.281                                                           |
| Lowest Frequency       | -17.929                                                         |
| Nucleus                | 11B                                                             |
| Acquired Size          | 16334                                                           |
| Spectral Size          | 3268                                                            |

Supplementary Figure 169.  $^{11}\text{B}\{^1\text{H}\}$  NMR Spectrum of 14.

crf-4-65-B-coupling-CDCl3

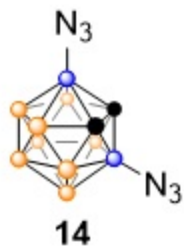

-4.189  
-5.100

-13.941  
-15.235  
-16.390  
-17.587

| Parameter              | Value                                                                     |
|------------------------|---------------------------------------------------------------------------|
| Data file Name         | C:/Users/Administrator/Desktop/201508-cr4-65/201508-cr4-65-coupling/1/fid |
| Title                  | 201508-cr4-65-coupling                                                    |
| Comment                |                                                                           |
| Origin                 | UNMR Bruker Analytische Messtechnik GmbH                                  |
| Owner                  | root                                                                      |
| Site                   |                                                                           |
| Spectrometer           | dr400                                                                     |
| Author                 |                                                                           |
| Solvent                | DMSO                                                                      |
| Temperature            | 300.0                                                                     |
| Pulse Sequence         | zing_1gy                                                                  |
| Number of Scans        | 562                                                                       |
| Receiver Gain          | 32                                                                        |
| Relaxation Delay       | 0.0000                                                                    |
| Pulse Width            | 13.4000                                                                   |
| Acquisition Time       | 0.395                                                                     |
| Acquisition Date       | 2015-08-16 18:01:48                                                       |
| Modification Date      | 2015-08-16 18:01:20                                                       |
| Spectrometer Frequency | 128.38                                                                    |
| Spectral Width         | 51221                                                                     |
| Lowest Frequency       | -14882.9                                                                  |
| Nucleus                | 11B                                                                       |
| Acquired Size          | 16334                                                                     |
| Spectral Size          | 3268                                                                      |

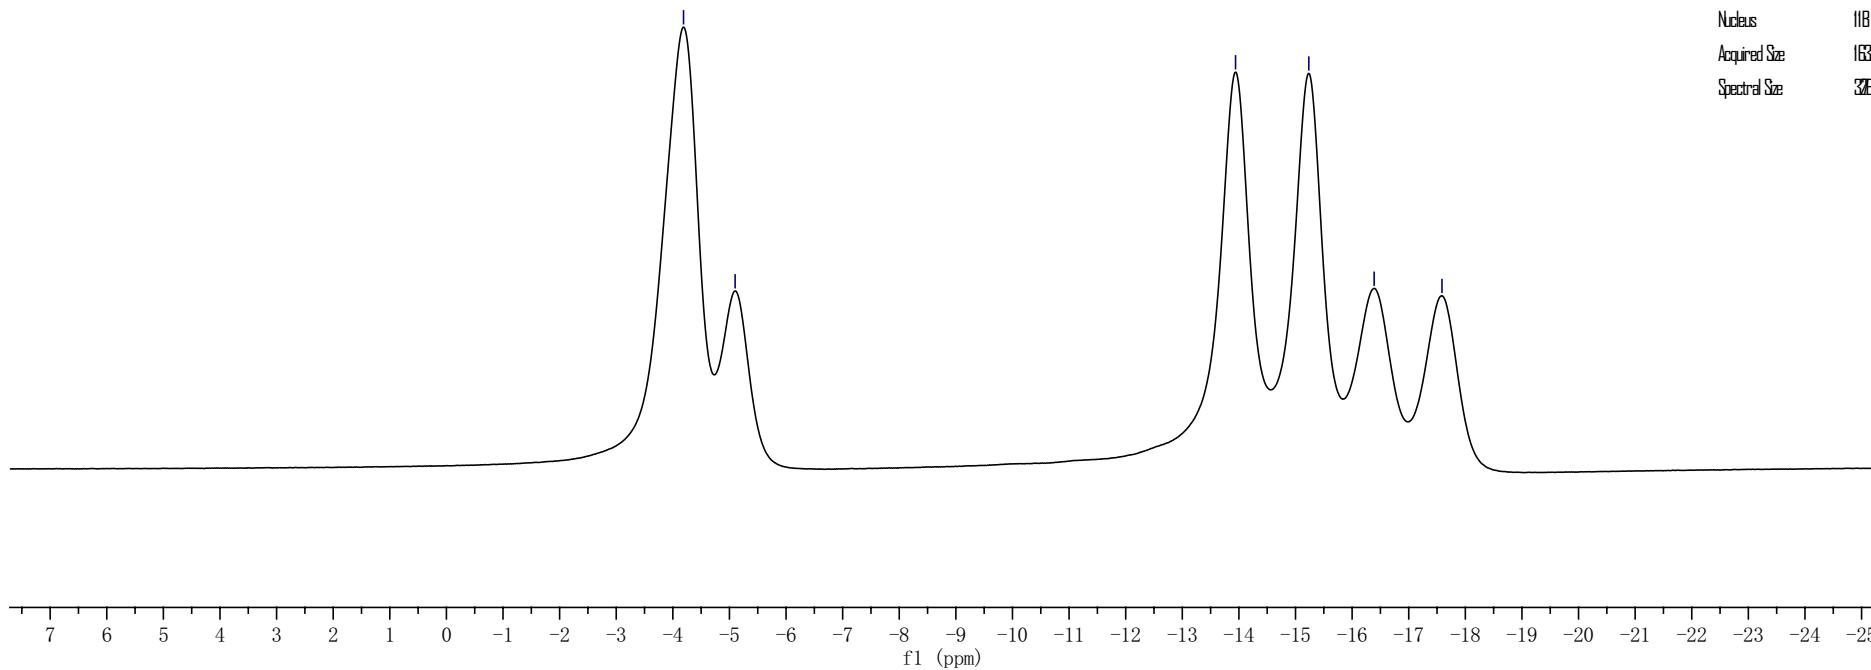

Supplementary Figure 170. <sup>11</sup>B NMR Spectrum of 14.

crf-7-54-H-CDCl3

7.260

5.334

4.553  
4.529  
4.505  
4.481  
4.464  
4.440  
4.417  
4.393

1.471  
1.447  
1.423  
1.418  
1.394  
1.370

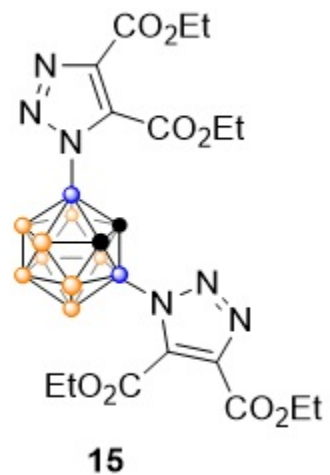

| Parameter              | Value            |
|------------------------|------------------|
| Title                  | crf754-H127      |
| Comment                | STANDARD OBSERVE |
| Origin                 | Varian           |
| Owner                  |                  |
| Site                   |                  |
| Spectrometer           | mercury          |
| Author                 | omc              |
| Solvent                | CDCl3            |
| Temperature            | 21.0             |
| Pulse Sequence         | sgzb             |
| Number of Scans        | 8                |
| Receiver Gain          | 32               |
| Relaxation Delay       | 1.0000           |
| Pulse Width            | 0.0000           |
| Acquisition Date       | 2015/28/10 3: 3  |
| Spectrometer Frequency | 300.03           |
| Spectral Width         | 5494.5           |
| Lowest Frequency       | -70.5            |
| Nucleus                | 1H               |
| Acquired Size          | 10333            |
| Spectral Size          | 3268             |

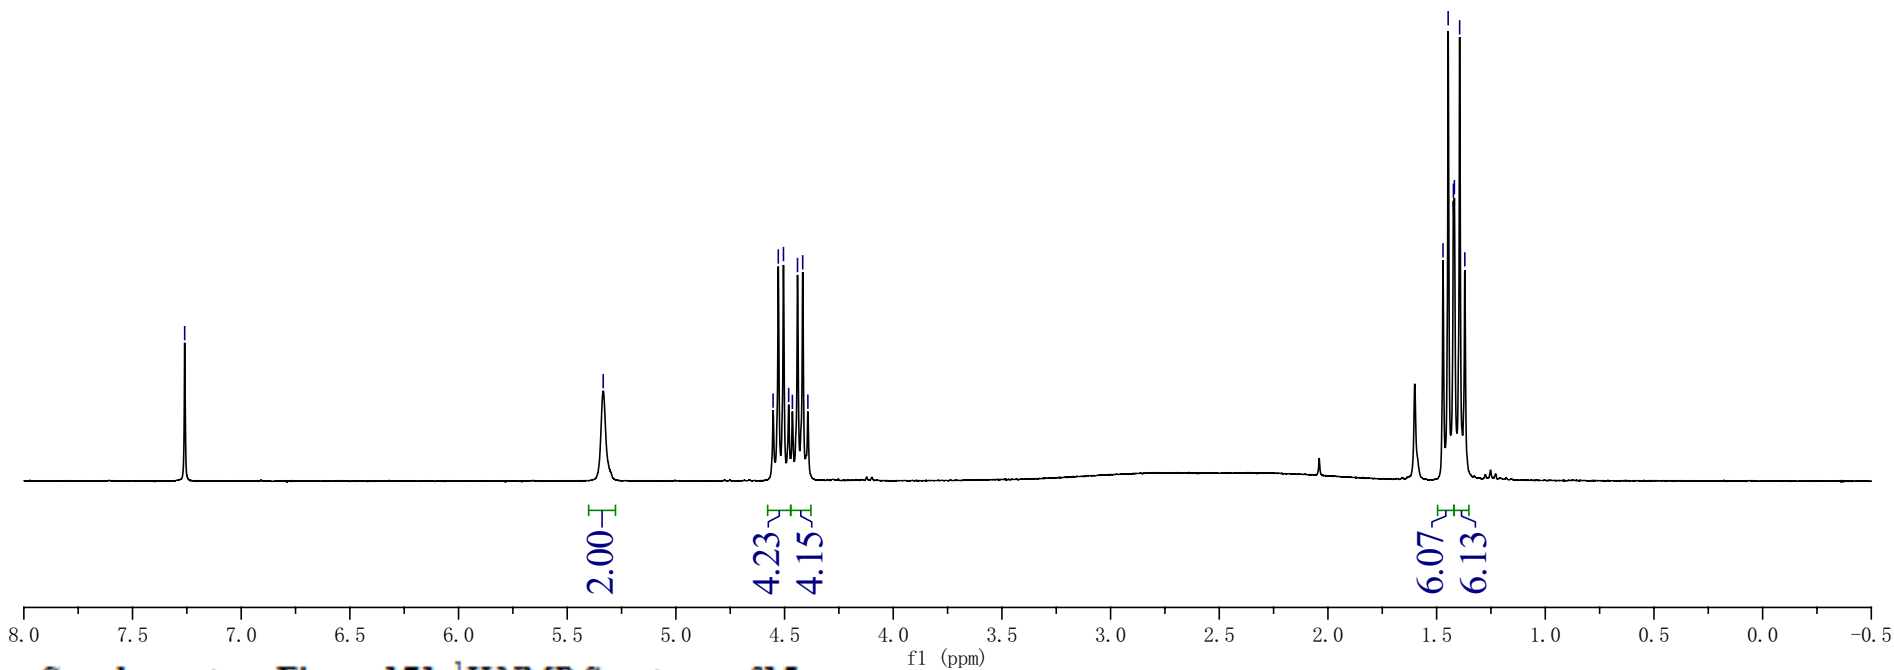

Supplementary Figure 171. <sup>1</sup>H NMR Spectrum of 15.



crf-7-54-C-CDCl3

159.728  
159.381

139.293  
138.952

77.724  
77.300  
76.876

64.147  
62.249  
60.573

14.377  
14.050

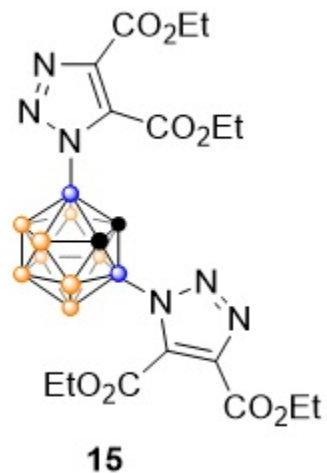

| Parameter              | Value             |
|------------------------|-------------------|
| Title                  | crf754C           |
| Comment                | 13C OBSERVE       |
| Origin                 | Varien            |
| Owner                  |                   |
| Site                   |                   |
| Spectrometer           | mercury           |
| Author                 | omc               |
| Solvent                | CDCl3             |
| Temperature            | 21.0              |
| Pulse Sequence         | zgpg30            |
| Number of Scans        | 20                |
| Receiver Gain          | 38                |
| Relaxation Delay       | 1.0000            |
| Pulse Width            | 0.0000            |
| Acquisition Date       | 20151208 11:13:33 |
| Spectrometer Frequency | 75.45             |
| Spectral Width         | 2949.8            |
| Lowest Frequency       | -285.2            |
| Nucleus                | 13C               |
| Acquired Size          | 30738             |
| Spectral Size          | 65536             |

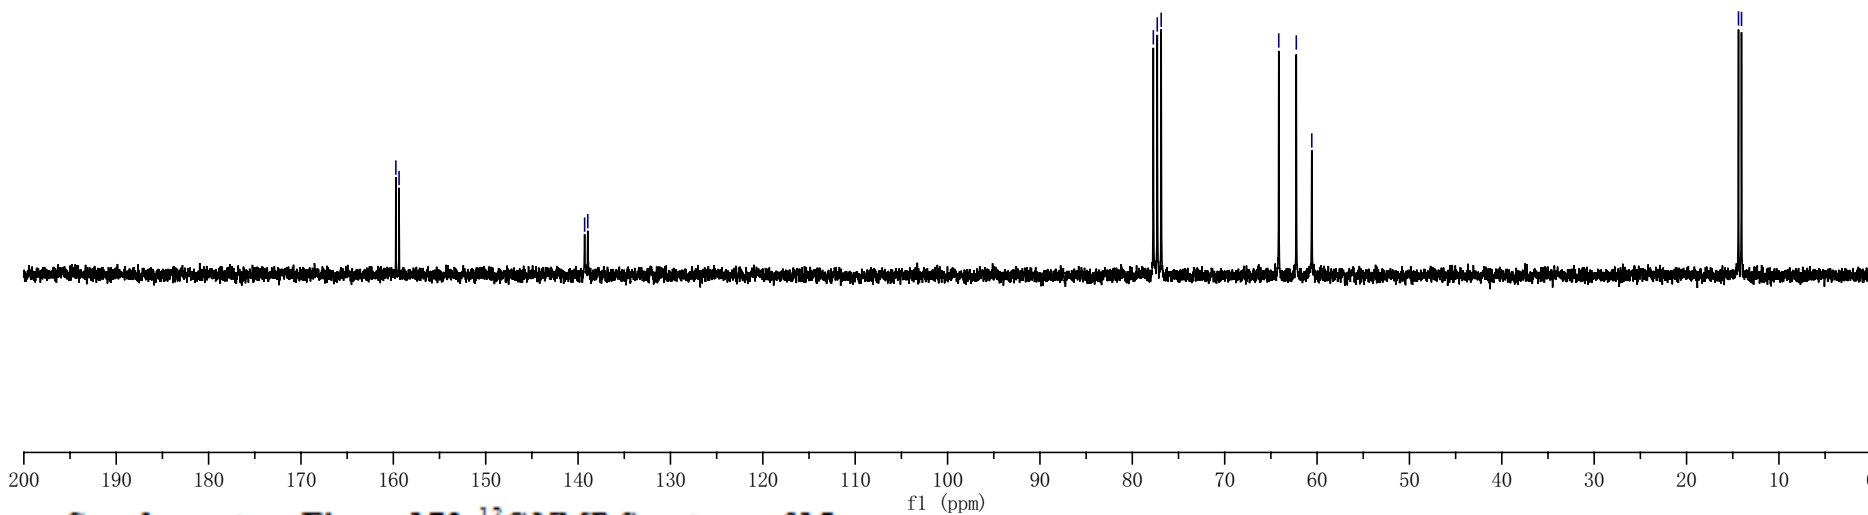

Supplementary Figure 172. <sup>13</sup>C NMR Spectrum of 15.

| Parameter              | Value                                                          |
|------------------------|----------------------------------------------------------------|
| Data File Name         | G:/Users/Administrator/Desktop/2135b-crf754/2135b-crf754/1/fid |
| Title                  | 2135b-crf754                                                   |
| Comment                |                                                                |
| Origin                 | UNMR Bruker Analytische Messtechnik GmbH                       |
| Owner                  | root                                                           |
| Site                   |                                                                |
| Spectrometer           | cry400                                                         |
| Author                 |                                                                |
| Solvent                | DMSO                                                           |
| Temperature            | 300.0                                                          |
| Pulse Sequence         | aring1g                                                        |
| Number of Scans        | 512                                                            |
| Receiver Gain          | 32                                                             |
| Relaxation Delay       | 0.0000                                                         |
| Pulse Width            | 13.4000                                                        |
| Acquisition Time       | 0.512                                                          |
| Acquisition Date       | 2015/2/27 19:05:40                                             |
| Modification Date      | 2015/2/27 13:34:31                                             |
| Spectrometer Frequency | 128.38                                                         |
| Spectral Width         | 3261.3                                                         |
| Lowest Frequency       | -16407.9                                                       |
| Nucleus                | <sup>11</sup> B                                                |
| Acquired Size          | 16384                                                          |
| Spectral Size          | 3268                                                           |

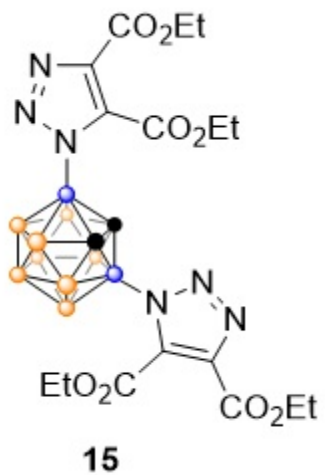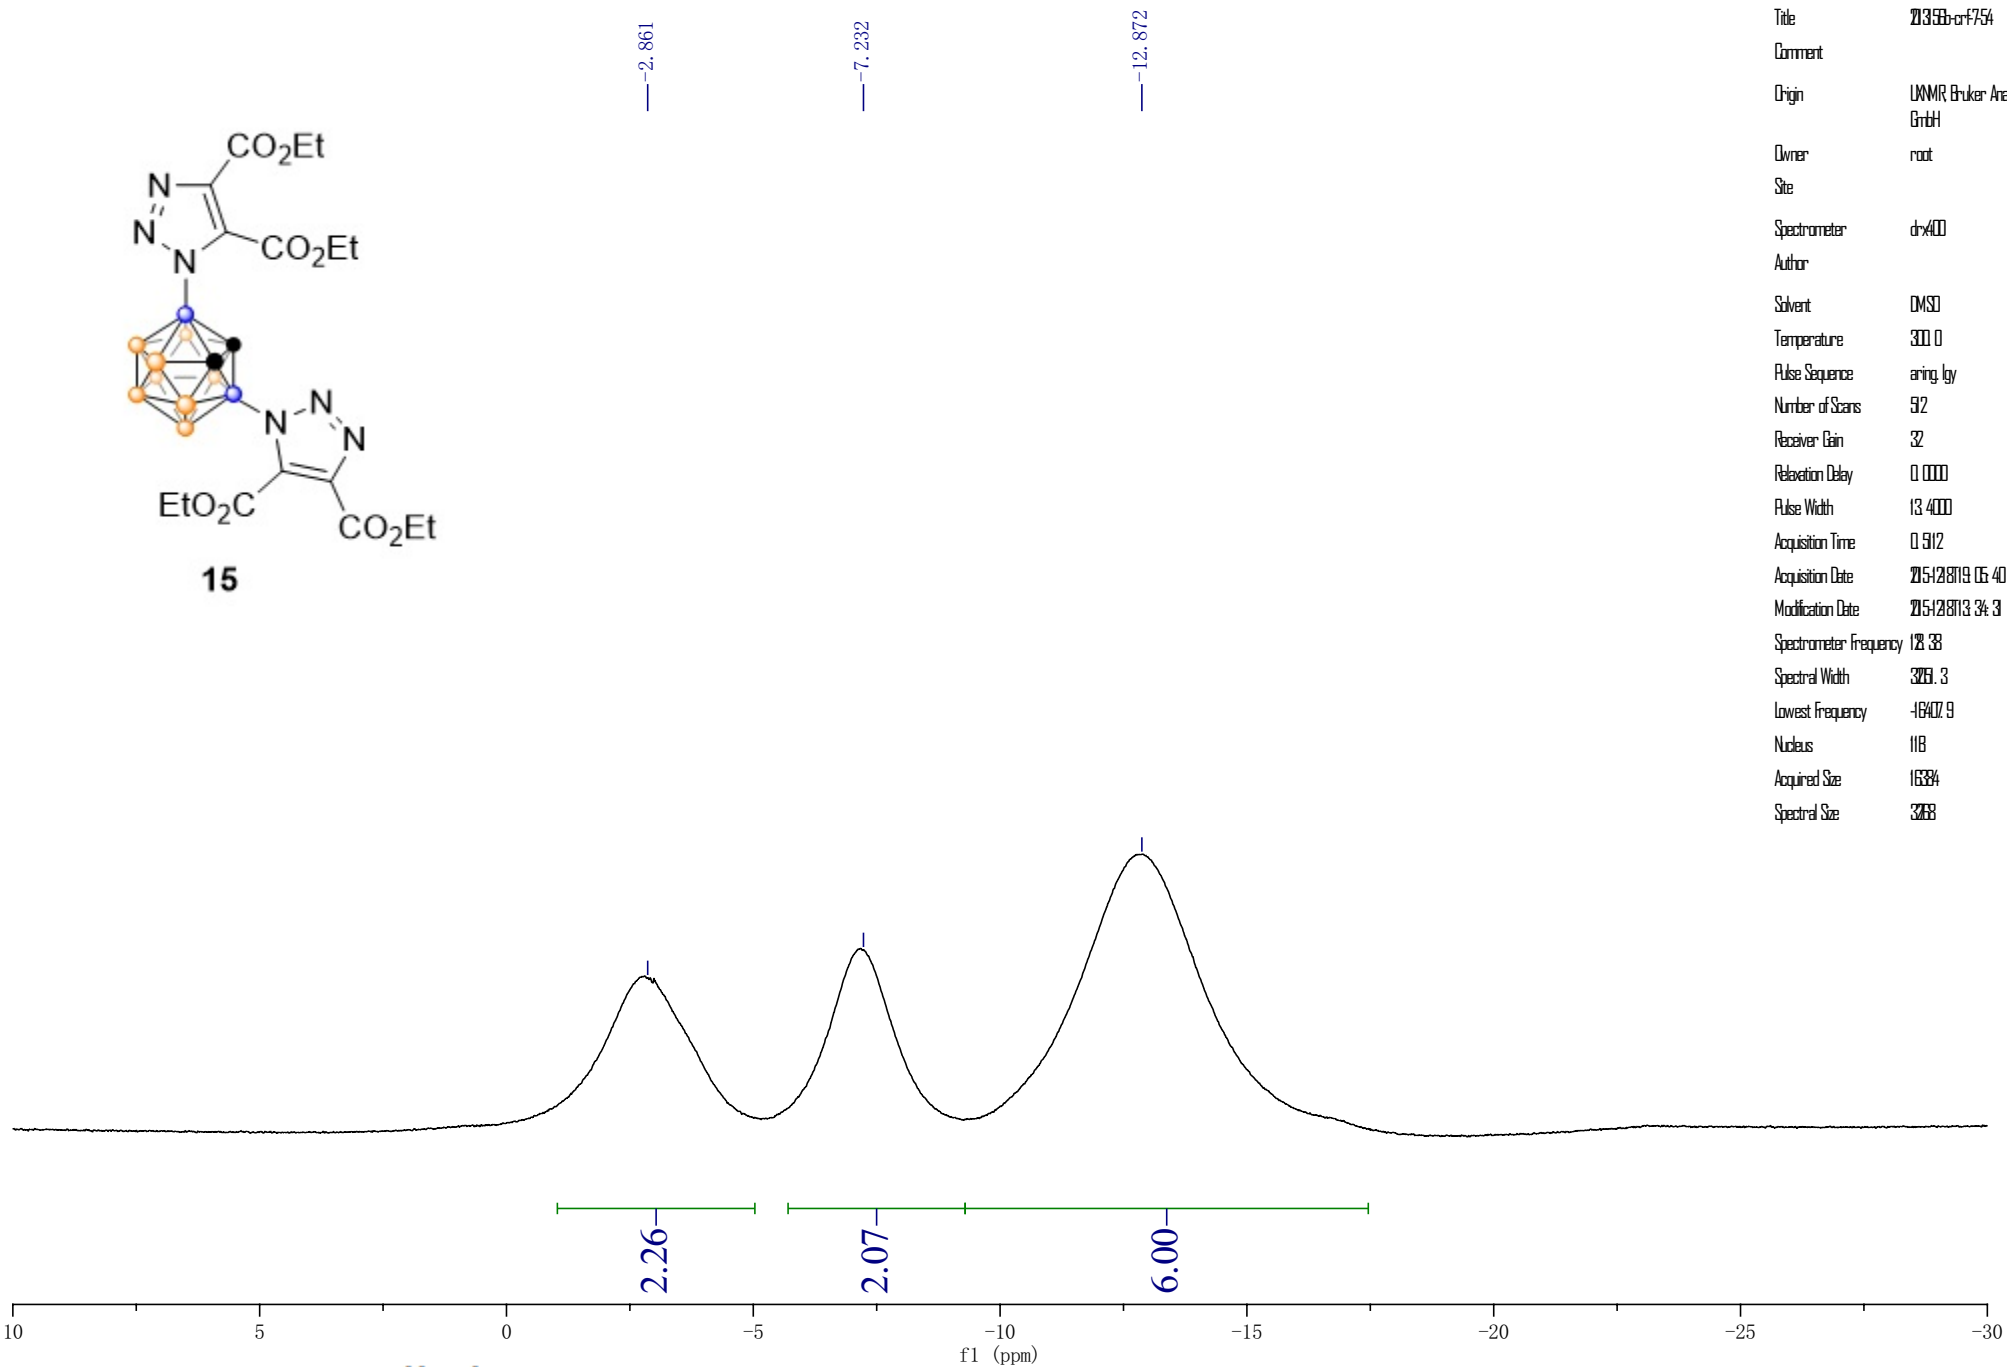

Supplementary Figure 173. <sup>11</sup>B{<sup>1</sup>H} NMR Spectrum of 15.

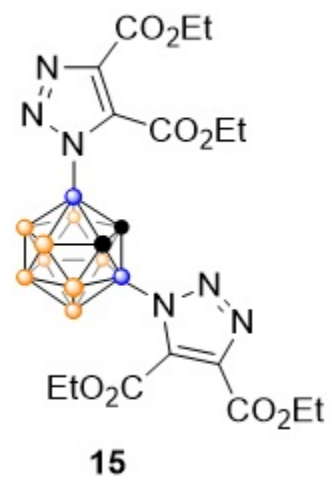

-2.745

-7.151

-12.649

| Parameter              | Value                                                                    |
|------------------------|--------------------------------------------------------------------------|
| Data File Name         | C:/Users/Administrator/Desktop/21355b-crf754/21355b-crf754-coupling/1/1d |
| Title                  | 21355b-crf754-coupling                                                   |
| Comment                |                                                                          |
| Origin                 | LNMNR Bruker Analytische Messtechnik GmbH                                |
| Owner                  | root                                                                     |
| Site                   |                                                                          |
| Spectrometer           | dx400                                                                    |
| Author                 |                                                                          |
| Solvent                | DMSO                                                                     |
| Temperature            | 300.0                                                                    |
| Pulse Sequence         | aring.1g                                                                 |
| Number of Scans        | 512                                                                      |
| Receiver Gain          | 32                                                                       |
| Relaxation Delay       | 0.0000                                                                   |
| Pulse Width            | 13.4000                                                                  |
| Acquisition Time       | 0.512                                                                    |
| Acquisition Date       | 2015/12/8/19:12:15                                                       |
| Modification Date      | 2015/12/8/13:34:27                                                       |
| Spectrometer Frequency | 128.38                                                                   |
| Spectral Width         | 3279.3                                                                   |
| Lowest Frequency       | -18407.9                                                                 |
| Nucleus                | 11B                                                                      |
| Acquired Size          | 16384                                                                    |
| Spectral Size          | 3268                                                                     |

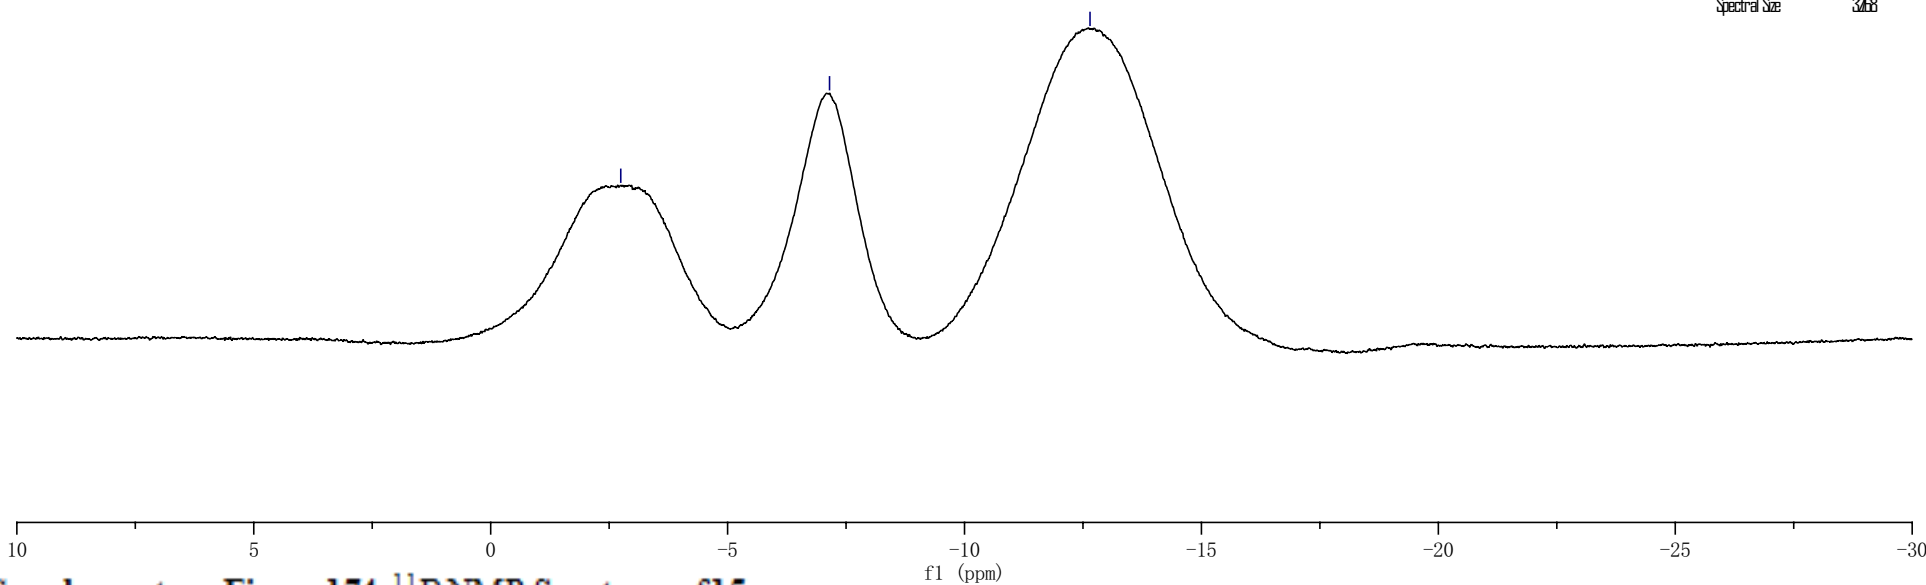

crf-5-93-H-DMSO

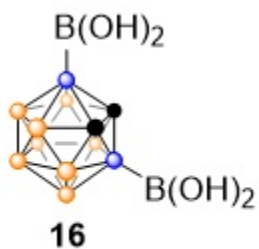

8.113

4.316

3.347

2.500

| Parameter              | Value               |
|------------------------|---------------------|
| Title                  | crf-5-93-H          |
| Comment                | STANDARD 1H OBSERVE |
| Origin                 | Varian              |
| Owner                  |                     |
| Site                   |                     |
| Spectrometer           | mercury             |
| Author                 | omc                 |
| Solvent                | DMSO                |
| Temperature            | 29.0                |
| Pulse Sequence         | sgpd                |
| Number of Scans        | 8                   |
| Receiver Gain          | 32                  |
| Relaxation Delay       | 1.0000              |
| Pulse Width            | 0.0000              |
| Acquisition Date       | 2015-11-27 09:50:46 |
| Spectrometer Frequency | 300.03              |
| Spectral Width         | 5494.5              |
| Lowest Frequency       | -706.0              |
| Nucleus                | 1H                  |
| Acquired Size          | 10888               |
| Spectral Size          | 3068                |

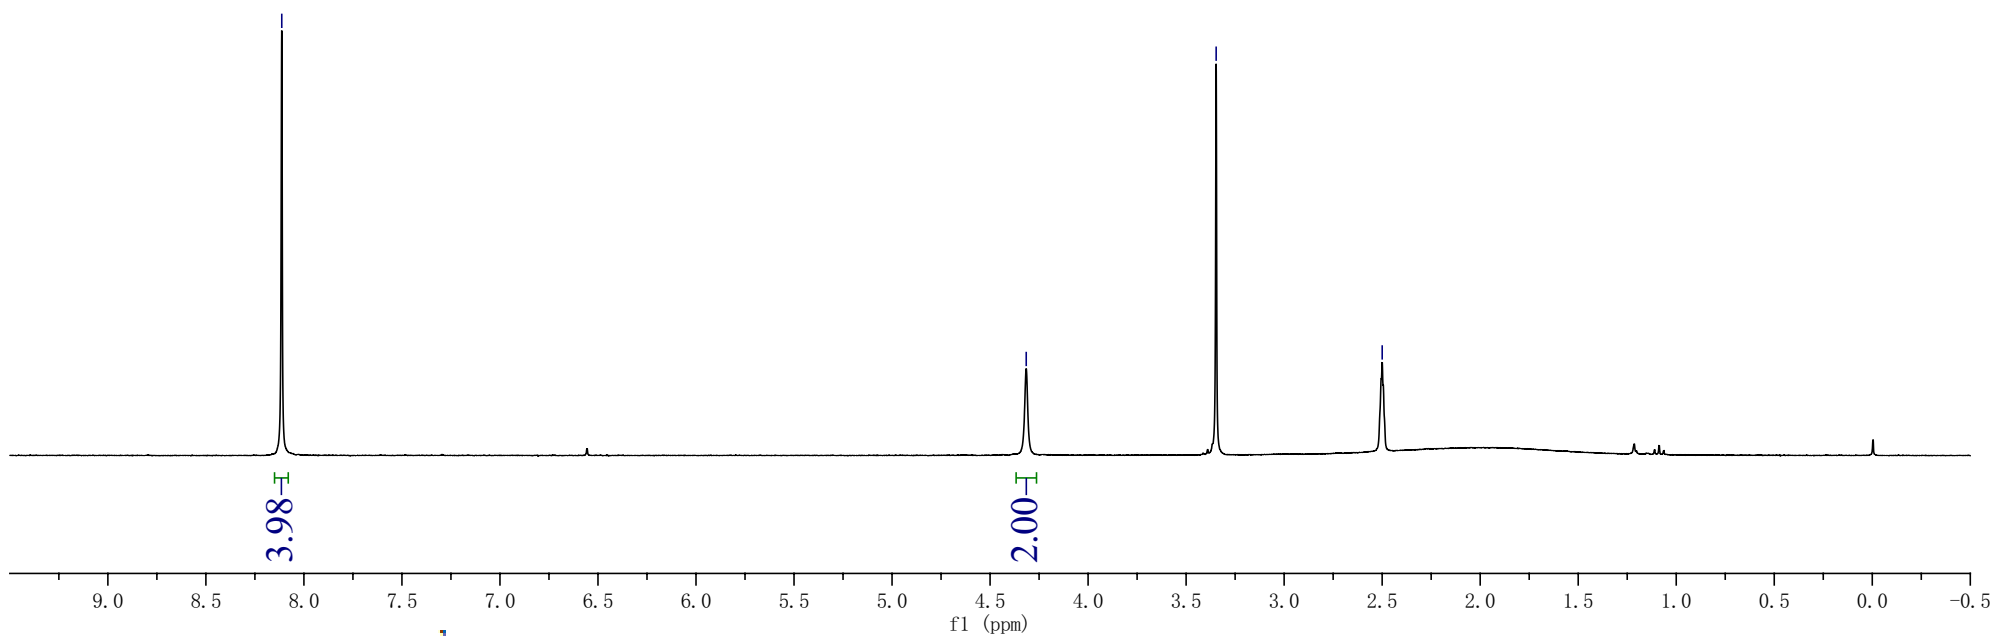

Supplementary Figure 175. <sup>1</sup>H NMR Spectrum of 16.

crf-5-93-C-DMSO

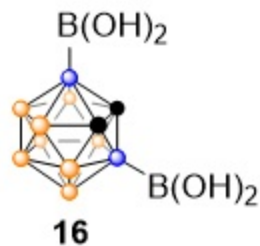

59.460

40.943  
40.674  
40.388  
40.106  
39.824  
39.555  
39.292

| Parameter              | Value               |
|------------------------|---------------------|
| Title                  | crf5-93-C-DMSO12    |
| Comment                | 13C OBSRV           |
| Origin                 | Varian              |
| Owner                  |                     |
| Site                   |                     |
| Spectrometer           | mercury             |
| Author                 | omc                 |
| Solvent                | DMSO                |
| Temperature            | 29.0                |
| Pulse Sequence         | sgul                |
| Number of Scans        | 224                 |
| Receiver Gain          | 39                  |
| Relaxation Delay       | 1.0000              |
| Pulse Width            | 0.0000              |
| Acquisition Date       | 2015-11-27 21:58:54 |
| Spectrometer Frequency | 75.45               |
| Spectral Width         | 2000.0              |
| Lowest Frequency       | -20.2               |
| Nucleus                | 13C                 |
| Acquired Size          | 2800                |
| Spectral Size          | 65536               |

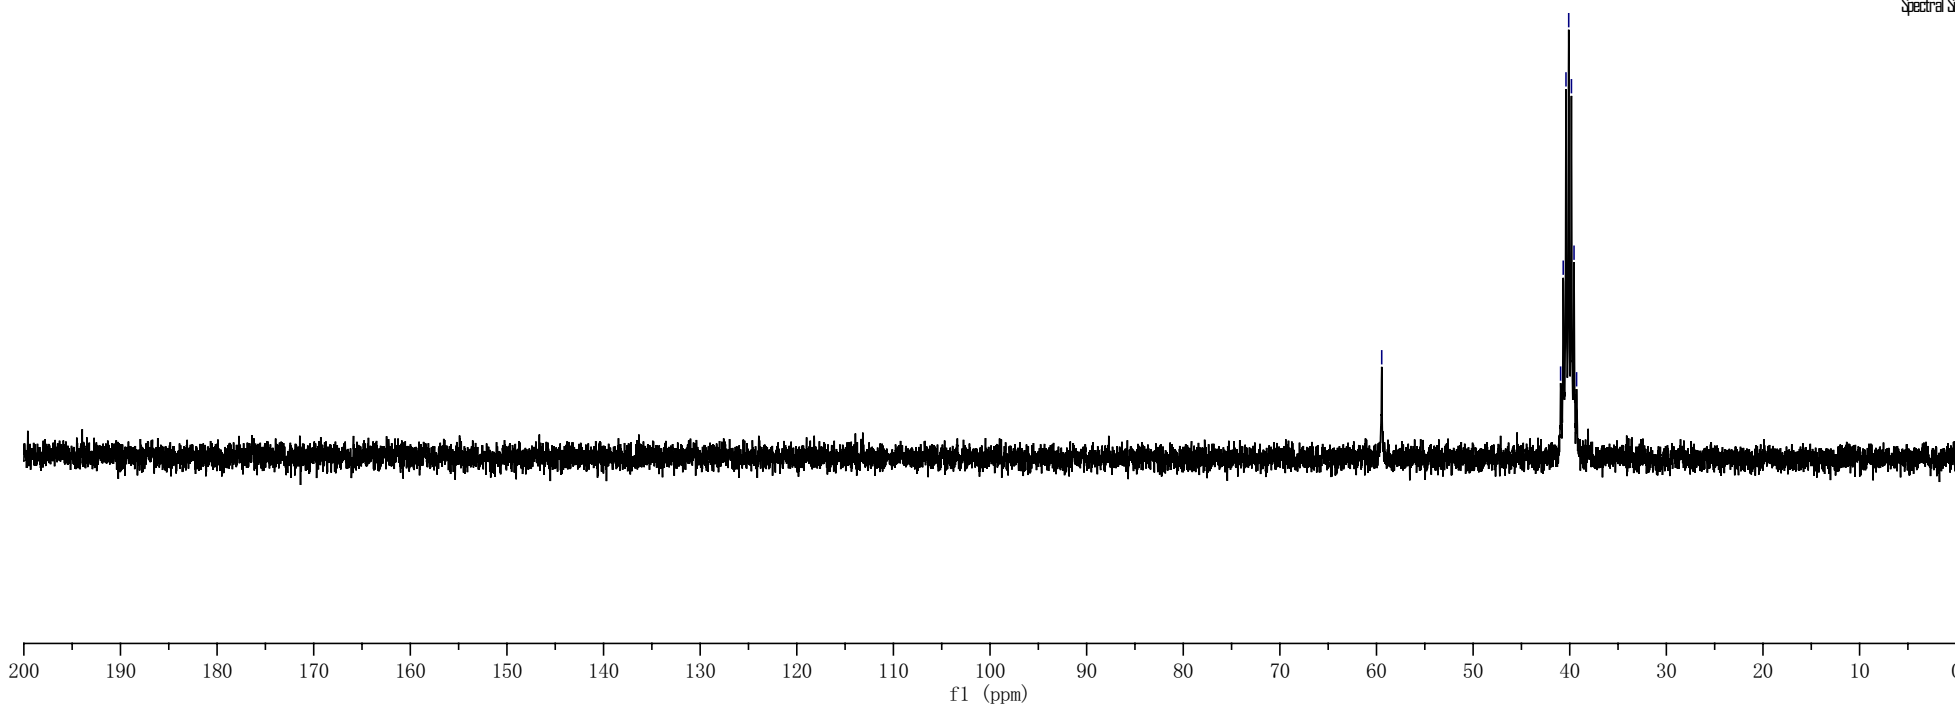

Supplementary Figure 176. <sup>13</sup>C NMR Spectrum of 16.

crf-5-93-B-decoupling-DMSO

33.285

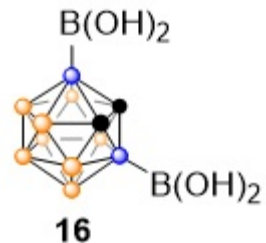

-1.479

-7.440

-11.047

| Parameter              | Value                                                           |
|------------------------|-----------------------------------------------------------------|
| Data File Name         | G:/Users/Administrator/Desktop/2015/crf-72/2135b-crf-5-93/1/fid |
| Title                  | 2135b-crf-5-93                                                  |
| Comment                |                                                                 |
| Origin                 | UNMR Bruker Analytische Messtechnik GmbH                        |
| Owner                  | root                                                            |
| Site                   |                                                                 |
| Spectrometer           | dx400                                                           |
| Author                 |                                                                 |
| Solvent                | DMSO                                                            |
| Temperature            | 300.0                                                           |
| Pulse Sequence         | aring1g                                                         |
| Number of Scans        | 26                                                              |
| Receiver Gain          | 32                                                              |
| Relaxation Delay       | 0.0000                                                          |
| Pulse Width            | 13.4000                                                         |
| Acquisition Time       | 0.512                                                           |
| Acquisition Date       | 2015/20/12/21 2                                                 |
| Modification Date      | 2015/20/14/33 2                                                 |
| Spectrometer Frequency | 128.38                                                          |
| Spectral Width         | 3269.3                                                          |
| Lowest Frequency       | -1663.3                                                         |
| Nucleus                | 11B                                                             |
| Acquired Size          | 16384                                                           |
| Spectral Size          | 3268                                                            |

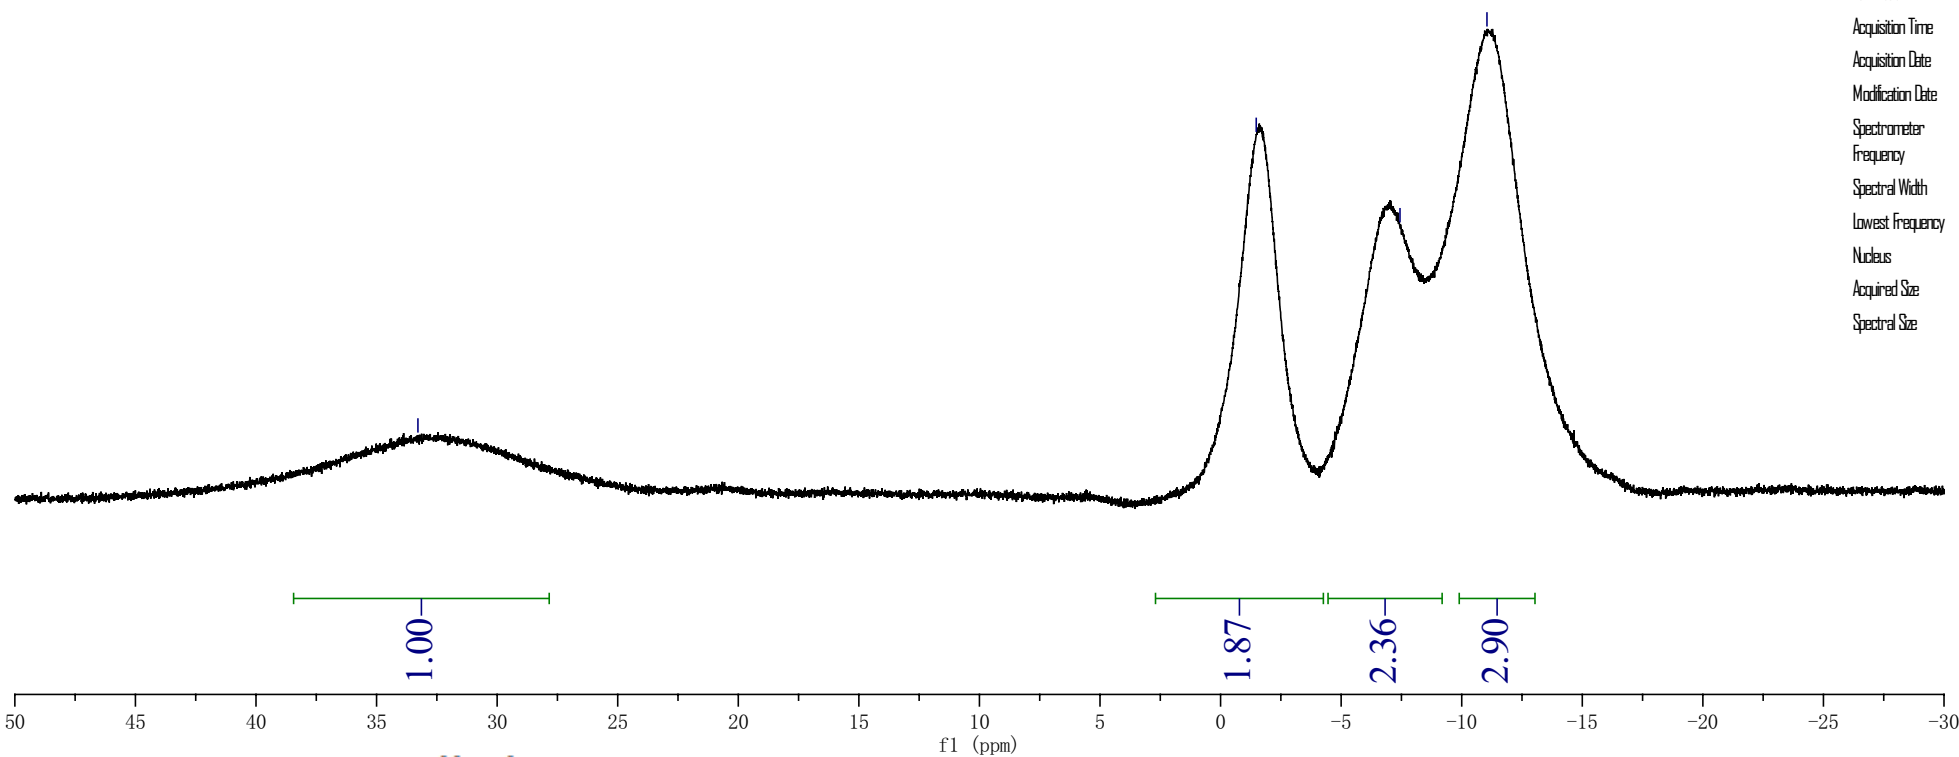

Supplementary Figure 177.  $^{11}\text{B}\{^1\text{H}\}$  NMR Spectrum of 16.

crf-5-93-B-coupling-DMSO

31.489

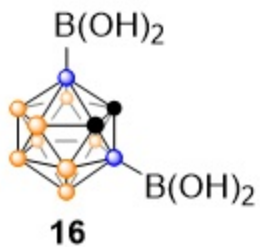

-2.001

-6.943

-11.292

| Parameter              | Value                                                                      |
|------------------------|----------------------------------------------------------------------------|
| Data File Name         | C:/Users/Administrator/Desktop/210119-cr-f72/2135B-cr-f5-93-coupling/1/fid |
| Title                  | 2135B-cr-f5-93-coupling                                                    |
| Comment                |                                                                            |
| Origin                 | UNMR Bruker Analytische Messtechnik GmbH                                   |
| Owner                  | root                                                                       |
| Site                   |                                                                            |
| Spectrometer           | dx400                                                                      |
| Author                 |                                                                            |
| Solvent                | DMSO                                                                       |
| Temperature            | 300.0                                                                      |
| Pulse Sequence         | aring1gy                                                                   |
| Number of Scans        | 256                                                                        |
| Receiver Gain          | 32                                                                         |
| Relaxation Delay       | 0.0000                                                                     |
| Pulse Width            | 13.4000                                                                    |
| Acquisition Time       | 0.512                                                                      |
| Acquisition Date       | 215420170228                                                               |
| Modification Date      | 215420171433.15                                                            |
| Spectrometer Frequency | 128.38                                                                     |
| Spectral Width         | 3261.3                                                                     |
| Lowest Frequency       | -16306.4                                                                   |
| Nucleus                | 11B                                                                        |
| Acquired Size          | 16384                                                                      |
| Spectral Size          | 3268                                                                       |

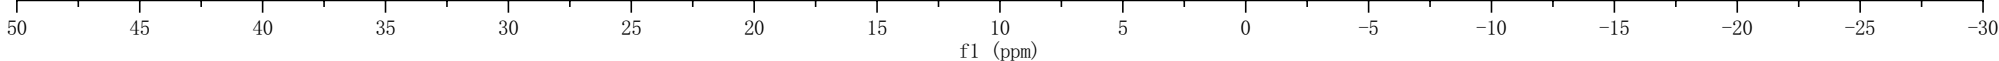

Supplementary Figure 78. <sup>11</sup>B NMR Spectrum of 16.
